# Supplementary material for: PomX, a ParA/MinD ATPase activating protein, is a triple regulator of cell division in Myxococcus xanthus
Source: eLife. 2021 Mar 18;10:e66160. doi: 10.7554/eLife.66160 (PMC7993993; doi:10.7554/eLife.66160)
Supplement: Figure 1—figure supplement 1—source data 1. [file elife-66160-fig1-figsupp1-data1.xlsx]

## Sheet: Figure 1_Source data 2
Source data for Figure 1_Figure supplement 1B
		Lane									Lane									Lane
		1	not relevant								1	not relevant								1	Marker
		2	not relevant								2	not relevant								2	DK1622
		3	not relevant								3	not relevant								3	SA4223
		4	not relevant								4	not relevant								4	SA9755
		5	not relevant								5	not relevant								5	SA9762
		6	Marker								6	Marker								6	SA9756
		7	DK1622								7	DK1622								7	SA9757
		8	SA4223								8	SA4223								8	not relevant
		9	SA4297								9	SA9727
		10	SA4252								10	SA9726
