# Supplementary material for: PomX, a ParA/MinD ATPase activating protein, is a triple regulator of cell division in Myxococcus xanthus
Source: eLife. 2021 Mar 18;10:e66160. doi: 10.7554/eLife.66160 (PMC7993993; doi:10.7554/eLife.66160)
Supplement: Figure 1—source data 1. [file elife-66160-fig1-data1.xlsx]

## Sheet: Figure 1-source data 1
Source Data for Figure 1D											minicells
Strain	DK1622	SA4223	SA4297	SA4252	SA9727	SA9726	SA9755	SA9762
N=	789	602	1009	1202	788	771	734	660
Mean	7.95853	13.0769	7.67691	7.66213	6.90461	13.038	8.73852	13.7725
STDEV	1.80501	6.0889	1.74498	1.71837	1.43281	6.53319	2.0992	6.11452
Cell length	4.59908	1.28864	4.27969	4.2066	4.19884	1.27172	4.16737	0.403697
	4.68184	1.29792	4.37838	4.23158	4.24955	1.37343	4.30938	2.18231
	4.73396	1.40685	4.53155	4.25302	4.26839	1.46733	4.69005	2.28553
	4.75602	1.49221	4.69746	4.41219	4.30144	1.68982	4.9568	2.37995
	4.80931	1.57111	4.75287	4.53866	4.34035	1.76767	5.03759	2.91389
	4.84363	1.59207	4.86029	4.54237	4.34635	1.90872	5.07155	3.52695
	4.96431	1.60591	4.9191	4.57728	4.43004	1.92299	5.08186	4.1318
	4.97983	1.63887	4.92227	4.58452	4.4371	1.9294	5.15499	4.26198
	4.99897	1.76506	4.92548	4.60539	4.5246	2.03535	5.15912	4.3276
	5.01413	1.83218	4.94458	4.62973	4.53002	2.07193	5.16198	4.33733
	5.05988	1.91989	4.95783	4.72996	4.57	2.20549	5.21122	4.49153
	5.09026	1.97347	4.97376	4.81836	4.60993	2.22006	5.32653	4.52303
	5.10847	1.98434	4.98713	4.86875	4.63658	2.6403	5.38632	4.6009
	5.10871	2.04608	4.98842	4.87198	4.64826	2.70163	5.38908	4.71664
	5.13329	2.05554	5.03424	4.87671	4.66687	2.76457	5.42552	4.80548
	5.13944	2.07913	5.0533	4.88911	4.66826	3.02923	5.45116	5.03052
	5.16101	2.11421	5.06626	4.9096	4.67069	3.14516	5.50514	5.09777
	5.18046	2.38425	5.0809	4.91859	4.67949	3.2942	5.50846	5.2131
	5.1839	2.85694	5.10418	4.92386	4.69925	3.33602	5.52198	5.41084
	5.19527	3.04662	5.12743	4.92424	4.70638	3.52054	5.56035	5.41927
	5.24148	3.14705	5.16727	4.93261	4.70687	3.75721	5.57584	5.47954
	5.26691	3.22968	5.17191	4.96754	4.7417	4.05278	5.5785	5.48739
	5.27085	3.81523	5.20474	4.96924	4.76374	4.23544	5.58399	5.5478
	5.29062	3.87108	5.20705	5.00453	4.76524	4.2494	5.58471	5.55566
	5.31356	3.99776	5.22051	5.0152	4.77198	4.5234	5.60538	5.63479
	5.33772	4.04855	5.2218	5.01613	4.77792	4.5334	5.60934	5.71955
	5.35804	4.08537	5.22281	5.02437	4.7803	4.80783	5.61234	5.7429
	5.44129	4.21171	5.24386	5.02894	4.7908	4.89951	5.68816	5.75266
	5.47979	4.42946	5.24994	5.03275	4.79103	4.95354	5.6958	5.86302
	5.48008	4.54842	5.2663	5.0631	4.79274	4.97137	5.69967	5.87069
	5.4823	4.57205	5.26885	5.06652	4.83239	5.11078	5.73818	5.8986
	5.50103	4.57445	5.28381	5.06992	4.83558	5.11363	5.76134	5.93065
	5.5147	4.59577	5.28579	5.08708	4.84134	5.11689	5.77832	5.95312
	5.51699	4.6038	5.294	5.12939	4.84138	5.12073	5.7944	5.96212
	5.53455	4.65606	5.29586	5.13694	4.84176	5.17552	5.83631	6.00881
	5.54741	4.65995	5.29945	5.14812	4.85519	5.17687	5.83843	6.12504
	5.55048	4.99985	5.30334	5.15111	4.85525	5.24399	5.85545	6.18134
	5.55329	5.0132	5.32982	5.15261	4.86523	5.33389	5.85933	6.23091
	5.56315	5.12707	5.33049	5.15909	4.88878	5.40351	5.86226	6.25348
	5.56684	5.2424	5.33521	5.16861	4.89916	5.41187	5.86362	6.27611
	5.56805	5.29207	5.34146	5.17434	4.90566	5.46135	5.86691	6.32639
	5.57551	5.3482	5.34433	5.17602	4.90633	5.6125	5.88015	6.34741
	5.60283	5.35342	5.347	5.18158	4.91253	5.66714	5.89017	6.41466
	5.60462	5.41484	5.3561	5.18823	4.91452	5.66929	5.89118	6.41885
	5.61699	5.49979	5.35668	5.18912	4.92168	5.66984	5.91029	6.5036
	5.62423	5.58051	5.35823	5.20555	4.93964	5.69205	5.92862	6.53676
	5.63119	5.81003	5.36426	5.21015	4.94654	5.71495	5.93924	6.54179
	5.63126	5.94448	5.3694	5.22458	4.94836	5.75175	5.95193	6.56098
	5.63189	5.98696	5.37339	5.22752	4.98176	5.75967	5.96553	6.59692
	5.63921	6.05667	5.38052	5.23181	4.9835	5.78156	5.99733	6.67053
	5.64432	6.08217	5.39485	5.23503	4.98425	5.81062	5.99881	6.702
	5.64638	6.13119	5.40504	5.24478	4.98842	5.85422	6.00392	6.75058
	5.65285	6.14617	5.41248	5.25366	4.99072	5.85828	6.00472	6.7631
	5.6533	6.1477	5.41253	5.25797	4.99507	5.88398	6.017	6.76321
	5.68533	6.19436	5.41985	5.25805	4.99528	5.89567	6.02888	6.83318
	5.70819	6.27017	5.42014	5.27556	5.01553	5.90169	6.03753	6.87239
	5.70954	6.28666	5.42368	5.28786	5.0182	5.90217	6.03953	6.9251
	5.73328	6.31675	5.42638	5.29105	5.02225	5.91734	6.05165	6.93321
	5.74681	6.3476	5.44988	5.3052	5.02566	5.93465	6.07037	6.93603
	5.75851	6.38714	5.47734	5.30797	5.02938	5.95947	6.07065	6.93804
	5.75853	6.46369	5.48324	5.31397	5.03057	5.97578	6.09173	6.96691
	5.76003	6.46731	5.48666	5.32215	5.03297	5.99825	6.12794	6.96729
	5.76097	6.48683	5.4957	5.32503	5.03806	6.00377	6.1341	7.00289
	5.77938	6.49445	5.49611	5.32692	5.0388	6.0116	6.13925	7.01915
	5.78216	6.54609	5.49977	5.32806	5.03984	6.01431	6.14877	7.02477
	5.78776	6.58816	5.50102	5.34024	5.05269	6.01718	6.15052	7.03731
	5.78792	6.59283	5.50252	5.34341	5.06562	6.03022	6.15351	7.05065
	5.79892	6.61657	5.50284	5.34873	5.07073	6.09636	6.20508	7.0686
	5.80047	6.63737	5.51703	5.35354	5.09507	6.10243	6.21885	7.10338
	5.81164	6.65603	5.5329	5.3617	5.10195	6.11797	6.22573	7.10356
	5.8288	6.65759	5.53669	5.36639	5.113	6.12368	6.25848	7.11566
	5.84058	6.65947	5.54019	5.37027	5.11382	6.1376	6.26253	7.17365
	5.84576	6.69245	5.54508	5.37418	5.1164	6.14259	6.26575	7.1879
	5.84603	6.71611	5.54948	5.37496	5.11929	6.15604	6.28022	7.21499
	5.86644	6.80607	5.55505	5.38159	5.12512	6.15691	6.29251	7.23762
	5.87143	6.81392	5.55778	5.38198	5.12944	6.16295	6.29644	7.2501
	5.87435	6.82359	5.56017	5.38217	5.14009	6.1646	6.2982	7.25107
	5.87513	6.84434	5.56059	5.39257	5.14671	6.17373	6.32198	7.26466
	5.88257	6.8664	5.56113	5.39769	5.15328	6.26943	6.33537	7.27056
	5.89727	6.94257	5.57178	5.4117	5.15677	6.28977	6.33934	7.27245
	5.90369	6.94428	5.57187	5.42235	5.15864	6.30646	6.34343	7.28985
	5.91773	6.98808	5.57414	5.42683	5.17595	6.31781	6.35736	7.30136
	5.92145	7.01287	5.58083	5.43349	5.17616	6.34874	6.3648	7.37602
	5.92584	7.04747	5.6092	5.43439	5.18272	6.35328	6.36664	7.39698
	5.93346	7.1101	5.60931	5.43466	5.18409	6.38332	6.40032	7.40854
	5.95017	7.11949	5.61224	5.43537	5.19406	6.40507	6.40301	7.44773
	5.95233	7.14141	5.61377	5.43897	5.20036	6.44598	6.40651	7.45793
	5.95414	7.21123	5.6141	5.44104	5.21493	6.45154	6.40914	7.51312
	5.95459	7.21451	5.61641	5.4413	5.22451	6.47974	6.41239	7.5435
	5.95946	7.22487	5.6188	5.44224	5.22852	6.53172	6.41447	7.56306
	5.96644	7.2434	5.6266	5.44859	5.2287	6.53389	6.42514	7.56921
	5.96931	7.26536	5.63475	5.4504	5.23566	6.54266	6.44842	7.57962
	5.98667	7.3296	5.64094	5.48336	5.23691	6.54754	6.45887	7.59427
	5.99071	7.3419	5.6537	5.48831	5.24263	6.55787	6.46042	7.62197
	5.99144	7.37259	5.65448	5.49275	5.2463	6.55957	6.46443	7.68773
	5.99625	7.3874	5.6678	5.49666	5.25248	6.56059	6.46475	7.69425
	6.00515	7.40891	5.66997	5.50752	5.25814	6.60963	6.46669	7.70122
	6.01143	7.41702	5.67688	5.50811	5.25899	6.61406	6.47428	7.70171
	6.01499	7.43769	5.67892	5.52026	5.25992	6.6546	6.47481	7.71723
	6.01916	7.44527	5.68054	5.52814	5.26414	6.65501	6.47569	7.72018
	6.02058	7.50323	5.68192	5.54074	5.27288	6.66616	6.47999	7.76813
	6.02424	7.52105	5.68514	5.55503	5.28309	6.744	6.51069	7.82953
	6.02606	7.53268	5.68543	5.55947	5.28355	6.75013	6.51727	7.84075
	6.0325	7.53358	5.68649	5.56314	5.28603	6.75228	6.5271	7.87189
	6.0409	7.58031	5.69056	5.56318	5.29765	6.75618	6.53038	7.88018
	6.05666	7.59279	5.69095	5.56344	5.29775	6.76467	6.53935	7.94924
	6.0603	7.6387	5.69706	5.56784	5.31026	6.76772	6.55169	7.95208
	6.0653	7.64141	5.70162	5.56962	5.31401	6.80583	6.55233	8.009
	6.06698	7.65205	5.70675	5.57238	5.32006	6.85407	6.57793	8.02239
	6.08226	7.76114	5.70971	5.57486	5.33711	6.86021	6.58356	8.02477
	6.08556	7.78826	5.71227	5.58246	5.33775	6.86169	6.58743	8.04573
	6.08795	7.88851	5.73034	5.59004	5.33799	6.88256	6.59476	8.04895
	6.09745	7.89373	5.73188	5.59138	5.3563	6.8984	6.59707	8.05399
	6.10615	7.90687	5.73265	5.5917	5.35818	6.91242	6.61851	8.09171
	6.10619	7.91083	5.74095	5.59867	5.36187	6.92707	6.64653	8.10701
	6.1103	7.91211	5.74261	5.59899	5.38413	6.93181	6.65204	8.15678
	6.12979	8.00603	5.7433	5.59904	5.39627	6.94941	6.65601	8.17566
	6.13386	8.0277	5.75073	5.60823	5.40085	6.96502	6.66046	8.18393
	6.13914	8.0342	5.7583	5.60935	5.40755	6.99485	6.66249	8.20673
	6.15734	8.06721	5.76037	5.61434	5.42086	6.99627	6.67871	8.23237
	6.15807	8.0807	5.76384	5.61698	5.42917	6.99917	6.68419	8.26482
	6.16174	8.08318	5.77547	5.61803	5.43625	7.00373	6.68751	8.27582
	6.16523	8.09127	5.77561	5.61896	5.4384	7.02246	6.6926	8.27973
	6.16948	8.09819	5.78165	5.62051	5.44198	7.03932	6.7032	8.29922
	6.18281	8.1016	5.78559	5.62341	5.44296	7.04172	6.70493	8.31461
	6.18731	8.13727	5.79168	5.62486	5.47261	7.05745	6.71904	8.34507
	6.19014	8.15588	5.79523	5.63409	5.47566	7.0685	6.72313	8.36096
	6.19474	8.16806	5.79584	5.63595	5.47727	7.07517	6.7288	8.36638
	6.19651	8.19102	5.79655	5.65103	5.48042	7.12769	6.72888	8.36694
	6.20073	8.22257	5.80601	5.65568	5.48771	7.12881	6.74056	8.43168
	6.20161	8.22482	5.80857	5.65888	5.48879	7.13154	6.74096	8.43664
	6.21467	8.25031	5.81109	5.66933	5.49487	7.13488	6.74362	8.46184
	6.22183	8.265	5.8204	5.67308	5.49571	7.142	6.77289	8.49116
	6.2406	8.27284	5.8271	5.67406	5.49759	7.17803	6.77596	8.50005
	6.24314	8.27574	5.84144	5.67851	5.5048	7.17836	6.78571	8.50042
	6.24372	8.28182	5.84488	5.68682	5.50985	7.22711	6.78774	8.50731
	6.26188	8.2927	5.85186	5.68696	5.51216	7.23806	6.79608	8.52414
	6.265	8.31605	5.858	5.6882	5.51768	7.2411	6.79787	8.56556
	6.27045	8.36917	5.85902	5.69456	5.51913	7.26871	6.80207	8.57098
	6.27479	8.37262	5.86303	5.70843	5.53058	7.32248	6.80613	8.58425
	6.27644	8.37497	5.8675	5.71097	5.53475	7.33057	6.80644	8.62008
	6.27779	8.42305	5.86931	5.72112	5.53762	7.3657	6.80934	8.62548
	6.28009	8.42356	5.87681	5.72896	5.53965	7.36992	6.8203	8.65673
	6.28063	8.43112	5.87944	5.73129	5.54117	7.3709	6.82694	8.66133
	6.29445	8.46817	5.88005	5.73996	5.54458	7.39185	6.83713	8.67008
	6.29589	8.49591	5.89027	5.74236	5.55428	7.49448	6.83899	8.71518
	6.2963	8.56107	5.89329	5.74315	5.55586	7.50716	6.85774	8.71654
	6.30457	8.57989	5.8944	5.74641	5.55749	7.51569	6.86715	8.74483
	6.3059	8.5863	5.89576	5.74799	5.55808	7.5317	6.86802	8.75248
	6.30658	8.60926	5.89848	5.74973	5.55896	7.54158	6.86873	8.76409
	6.31036	8.62058	5.90661	5.74994	5.56271	7.57017	6.89608	8.83871
	6.31736	8.62757	5.9124	5.7552	5.57442	7.57027	6.89704	8.89171
	6.32822	8.63403	5.91728	5.76674	5.57863	7.59461	6.90794	8.92883
	6.33136	8.63655	5.91898	5.7703	5.59677	7.62489	6.91142	8.94195
	6.33588	8.67194	5.92271	5.77225	5.6028	7.64434	6.91218	8.96652
	6.341	8.67968	5.92292	5.77324	5.60451	7.65401	6.92331	8.96925
	6.34168	8.68361	5.92855	5.7747	5.60742	7.65885	6.94404	9.08659
	6.3453	8.70622	5.92951	5.78584	5.6096	7.67181	6.94537	9.12634
	6.36159	8.73234	5.93071	5.79102	5.6114	7.689	6.96038	9.14193
	6.36503	8.7394	5.93125	5.79229	5.61263	7.69313	6.96069	9.15176
	6.36706	8.74667	5.9324	5.79509	5.61646	7.69376	6.97123	9.17405
	6.37514	8.77635	5.93879	5.81036	5.61662	7.71527	6.98106	9.18503
	6.37654	8.77835	5.94192	5.81359	5.62642	7.72383	6.99009	9.19794
	6.38024	8.79038	5.94287	5.81622	5.63044	7.7404	6.99521	9.21932
	6.38536	8.81484	5.94518	5.81664	5.63161	7.74321	7.00274	9.23783
	6.39674	8.84162	5.94771	5.81941	5.63753	7.75348	7.01146	9.32171
	6.39842	8.86694	5.94931	5.82226	5.63913	7.77399	7.01904	9.34665
	6.40657	8.88778	5.95137	5.82862	5.64112	7.83001	7.02258	9.34917
	6.40792	8.9043	5.95932	5.83007	5.64532	7.8366	7.03245	9.35309
	6.41219	8.96851	5.96626	5.83083	5.66936	7.83943	7.04038	9.38379
	6.42345	8.99186	5.96643	5.83572	5.67048	7.86587	7.06125	9.38551
	6.42698	9.01428	5.97132	5.8409	5.67134	7.87644	7.0719	9.396
	6.42703	9.02011	5.97208	5.86169	5.67955	7.889	7.07347	9.40675
	6.44009	9.02151	5.98346	5.86208	5.68684	7.89235	7.07853	9.41356
	6.4464	9.02294	5.99688	5.86912	5.6933	7.89689	7.07971	9.43137
	6.44929	9.05633	6.00261	5.8746	5.69735	7.91243	7.08804	9.43574
	6.4578	9.07886	6.00506	5.87641	5.69735	7.9244	7.08827	9.44435
	6.45953	9.09181	6.01261	5.87956	5.70165	7.92626	7.08859	9.46696
	6.46013	9.12874	6.01875	5.89146	5.71375	7.95544	7.09709	9.48223
	6.46124	9.1357	6.02089	5.89304	5.72853	7.9668	7.09797	9.48618
	6.46154	9.14023	6.02138	5.89701	5.72893	7.96797	7.1055	9.51236
	6.465	9.14673	6.03178	5.8976	5.74803	8.00144	7.10733	9.52187
	6.46608	9.1977	6.0349	5.89854	5.75014	8.00176	7.10735	9.54141
	6.48447	9.2099	6.04072	5.90765	5.75095	8.00918	7.11624	9.58907
	6.48867	9.21667	6.05042	5.92231	5.75274	8.03164	7.15159	9.65107
	6.49001	9.21774	6.05211	5.92334	5.75277	8.07339	7.15333	9.65625
	6.4905	9.23599	6.05752	5.92987	5.76034	8.08371	7.16205	9.65941
	6.49956	9.26603	6.06243	5.93138	5.76745	8.09574	7.16544	9.71784
	6.50497	9.26857	6.06255	5.93219	5.77291	8.11074	7.17635	9.7367
	6.50653	9.27489	6.06845	5.93293	5.77692	8.13073	7.18951	9.73732
	6.51096	9.27591	6.07098	5.9385	5.78383	8.14293	7.21245	9.75153
	6.51199	9.28284	6.07534	5.93955	5.78548	8.17353	7.219	9.75467
	6.52347	9.28798	6.07841	5.94252	5.7889	8.19723	7.22061	9.76438
	6.52489	9.31772	6.09022	5.94725	5.79316	8.21351	7.22593	9.79398
	6.52757	9.32029	6.09212	5.94772	5.79649	8.23681	7.22895	9.80349
	6.55649	9.34087	6.09459	5.95782	5.79931	8.23924	7.24355	9.82545
	6.56202	9.3453	6.09538	5.96109	5.80087	8.27689	7.24824	9.8354
	6.56446	9.38189	6.09769	5.96408	5.80373	8.27982	7.25214	9.8362
	6.5668	9.39389	6.10644	5.96459	5.81254	8.28512	7.25403	9.83676
	6.56888	9.41883	6.11442	5.97261	5.81484	8.31282	7.27266	9.88436
	6.57011	9.4212	6.1203	5.97536	5.81509	8.37026	7.27302	9.91286
	6.57598	9.43213	6.12294	5.98455	5.82375	8.40953	7.2805	9.91458
	6.58145	9.43523	6.14557	5.99123	5.8241	8.42906	7.28149	9.9149
	6.59392	9.43654	6.14743	5.99128	5.82413	8.43581	7.28548	9.93502
	6.59455	9.45186	6.14915	5.99381	5.8292	8.466	7.29372	9.94564
	6.60519	9.46007	6.14933	6.00015	5.82964	8.47276	7.29785	9.96367
	6.61168	9.48184	6.15064	6.00169	5.83146	8.47665	7.30744	9.97375
	6.61224	9.52137	6.1532	6.00593	5.84117	8.49332	7.31406	9.97564
	6.62777	9.52687	6.15446	6.00811	5.85186	8.50051	7.32339	9.9788
	6.63673	9.5291	6.16485	6.01124	5.86543	8.50446	7.32574	9.99112
	6.63788	9.53398	6.16688	6.01308	5.86829	8.50531	7.33044	9.9942
	6.64545	9.58575	6.16741	6.02373	5.87508	8.51201	7.33136	10.0171
	6.66644	9.59609	6.16978	6.02448	5.87697	8.52309	7.33936	10.0231
	6.6683	9.60469	6.17023	6.02525	5.87916	8.52804	7.35153	10.0336
	6.67536	9.63445	6.18173	6.02936	5.88649	8.53408	7.387	10.0409
	6.67817	9.63622	6.18777	6.03421	5.88667	8.54117	7.39862	10.0445
	6.69855	9.65488	6.19782	6.04256	5.89407	8.55321	7.39939	10.0445
	6.70163	9.65541	6.20274	6.04505	5.89455	8.55403	7.41823	10.0689
	6.71265	9.66463	6.20393	6.05116	5.89967	8.55416	7.42149	10.0907
	6.71302	9.66576	6.2071	6.05278	5.90443	8.59988	7.42238	10.0944
	6.71719	9.68028	6.20875	6.05511	5.91101	8.60888	7.42595	10.2229
	6.72571	9.70229	6.20913	6.06477	5.91522	8.61819	7.46047	10.286
	6.72644	9.70526	6.21143	6.0677	5.91672	8.62813	7.46417	10.2953
	6.7275	9.74243	6.21234	6.07126	5.9212	8.63156	7.46447	10.3013
	6.73832	9.74298	6.21236	6.07443	5.92574	8.6426	7.46712	10.3492
	6.74872	9.74673	6.2133	6.07514	5.92679	8.64261	7.47592	10.3818
	6.74924	9.75416	6.21377	6.07661	5.92874	8.65535	7.48746	10.4058
	6.75024	9.76616	6.21407	6.07815	5.93099	8.66897	7.49383	10.4077
	6.75332	9.77869	6.21481	6.07904	5.9343	8.66998	7.50064	10.4431
	6.77789	9.7818	6.21942	6.08027	5.93876	8.68615	7.51035	10.45
	6.77949	9.78559	6.22156	6.08398	5.94439	8.69817	7.5179	10.4943
	6.78204	9.79471	6.22369	6.10141	5.94521	8.70861	7.52004	10.4945
	6.78521	9.82534	6.2242	6.10356	5.96461	8.71361	7.52398	10.4966
	6.78588	9.82832	6.22439	6.10586	5.96803	8.7354	7.52748	10.5002
	6.78858	9.8607	6.2273	6.1061	5.96863	8.76223	7.54234	10.5051
	6.79933	9.87074	6.22746	6.10679	5.96922	8.7862	7.54817	10.5387
	6.80228	9.89102	6.22753	6.11457	5.97146	8.78738	7.55574	10.5573
	6.81621	9.90375	6.23218	6.12178	5.97304	8.78886	7.55761	10.5633
	6.83524	9.92492	6.23592	6.12363	5.97469	8.79803	7.56995	10.5737
	6.84186	10.0191	6.23769	6.12438	5.98249	8.8068	7.57946	10.6025
	6.84458	10.0266	6.2394	6.12653	5.99069	8.80815	7.59034	10.6867
	6.84874	10.0268	6.24235	6.12698	5.99582	8.84413	7.59355	10.6905
	6.84953	10.0281	6.24251	6.13184	6.0104	8.8464	7.60003	10.6937
	6.8541	10.0307	6.24904	6.13611	6.01629	8.86493	7.60697	10.6989
	6.86246	10.0548	6.25158	6.1381	6.01912	8.86857	7.62652	10.704
	6.8672	10.1314	6.25213	6.14473	6.02125	8.88043	7.64545	10.7152
	6.87722	10.1519	6.25845	6.14603	6.02308	8.89299	7.64715	10.7408
	6.87804	10.1686	6.26083	6.14747	6.03766	8.94017	7.65298	10.7626
	6.88572	10.1687	6.26291	6.14958	6.0424	8.94028	7.67992	10.7706
	6.88593	10.1689	6.26421	6.16466	6.04369	8.94779	7.68061	10.8003
	6.90195	10.2021	6.26439	6.16982	6.04543	8.99133	7.68416	10.8435
	6.90352	10.2087	6.26731	6.17173	6.0489	8.99202	7.69005	10.8604
	6.90959	10.2101	6.26868	6.17872	6.04939	8.99445	7.69146	10.8685
	6.91339	10.2333	6.2728	6.17953	6.0513	8.99638	7.69312	10.8722
	6.91459	10.2395	6.27547	6.17983	6.05138	9.02125	7.69469	10.8754
	6.91922	10.2616	6.27995	6.18182	6.06297	9.0247	7.71307	10.8881
	6.92894	10.2749	6.28379	6.18691	6.06514	9.03545	7.71404	10.889
	6.9294	10.2837	6.29303	6.1889	6.07015	9.0866	7.71631	10.9558
	6.9298	10.3863	6.31813	6.19264	6.07034	9.10401	7.71941	10.9576
	6.93638	10.393	6.31866	6.19343	6.07501	9.12468	7.72196	10.9683
	6.93703	10.4347	6.32218	6.19394	6.07846	9.21761	7.73157	10.9745
	6.93773	10.4457	6.32611	6.20099	6.08107	9.22309	7.75743	10.9901
	6.94255	10.4511	6.32873	6.20099	6.08351	9.25863	7.76047	11.0427
	6.94281	10.5451	6.3428	6.2053	6.08695	9.27596	7.76197	11.0541
	6.94478	10.5526	6.34352	6.20761	6.08724	9.2783	7.76257	11.0667
	6.95055	10.5556	6.34447	6.20777	6.08811	9.27864	7.76699	11.0782
	6.956	10.6321	6.34477	6.20966	6.09041	9.28349	7.7677	11.0935
	6.96662	10.6397	6.34541	6.20996	6.09216	9.31539	7.77153	11.1181
	6.96805	10.678	6.34936	6.21858	6.09528	9.33838	7.78884	11.1222
	6.97446	10.6781	6.35154	6.22221	6.09603	9.34149	7.78909	11.1487
	6.9809	10.6851	6.3526	6.22452	6.0982	9.35231	7.79753	11.1508
	6.98296	10.6909	6.3593	6.23138	6.10071	9.37	7.80635	11.1869
	6.98337	10.6948	6.37135	6.2524	6.1043	9.37751	7.81757	11.2411
	6.98651	10.7021	6.37321	6.25243	6.1174	9.38275	7.82528	11.2609
	6.98871	10.7054	6.37612	6.25278	6.12018	9.3904	7.83052	11.2782
	6.99924	10.7686	6.38398	6.25754	6.12275	9.39616	7.83152	11.2849
	7.00853	10.7999	6.38794	6.2578	6.12387	9.40005	7.83522	11.3209
	7.01648	10.8074	6.38984	6.26065	6.13004	9.43001	7.83827	11.3293
	7.02041	10.8182	6.3902	6.26657	6.13008	9.44259	7.8393	11.3441
	7.02273	10.8285	6.39094	6.26674	6.1423	9.47167	7.84051	11.3458
	7.02435	10.8382	6.39121	6.2699	6.16455	9.49414	7.84465	11.3492
	7.04845	10.8534	6.39283	6.27159	6.17227	9.50786	7.84847	11.3492
	7.05285	10.8776	6.39446	6.27511	6.17501	9.50831	7.86826	11.4808
	7.05436	10.89	6.40976	6.27797	6.17662	9.52707	7.87228	11.489
	7.05672	10.8901	6.4115	6.27973	6.18037	9.57119	7.8777	11.5437
	7.06401	10.8963	6.41163	6.28011	6.18403	9.57608	7.87865	11.5474
	7.0791	10.9054	6.41232	6.28094	6.20599	9.58518	7.87979	11.5845
	7.09008	10.9287	6.41597	6.28742	6.21028	9.61776	7.88992	11.5969
	7.09611	10.941	6.41687	6.2965	6.21368	9.61896	7.90348	11.6566
	7.09881	10.9411	6.41844	6.29976	6.21535	9.6484	7.9062	11.6607
	7.11429	11.0184	6.42253	6.31332	6.21587	9.69755	7.91363	11.6872
	7.11459	11.0321	6.4275	6.32058	6.2192	9.70279	7.92438	11.7035
	7.11511	11.108	6.42771	6.32464	6.22355	9.72662	7.92962	11.7432
	7.14013	11.108	6.42829	6.32749	6.22442	9.73105	7.96357	11.7436
	7.14453	11.1449	6.44677	6.32832	6.2245	9.7566	7.97294	11.7471
	7.14825	11.2468	6.45111	6.32957	6.22544	9.75891	7.97385	11.7511
	7.1548	11.2483	6.45538	6.32968	6.23551	9.76909	7.98798	11.7802
	7.1548	11.2728	6.46718	6.33031	6.24529	9.77153	7.99636	11.8245
	7.15625	11.3164	6.46869	6.33122	6.24958	9.77278	8.00282	11.8684
	7.16074	11.3652	6.47416	6.33152	6.25094	9.82532	8.00306	11.9216
	7.17584	11.4071	6.47776	6.34551	6.25862	9.8265	8.00545	11.9288
	7.17888	11.4257	6.47794	6.34591	6.25914	9.84294	8.01572	11.9842
	7.1791	11.4424	6.48132	6.3462	6.26151	9.86819	8.02633	11.9853
	7.17933	11.4709	6.48322	6.34739	6.26566	9.87999	8.02802	11.9942
	7.18324	11.4733	6.48765	6.35256	6.26912	9.90168	8.03894	11.9995
	7.18521	11.4755	6.49943	6.35279	6.27353	9.92204	8.05107	12.0087
	7.1858	11.4758	6.50102	6.35297	6.28438	9.93655	8.06283	12.0516
	7.18806	11.5046	6.50693	6.3574	6.28653	9.94573	8.06884	12.118
	7.18894	11.6006	6.50775	6.35915	6.30174	9.97642	8.08988	12.1182
	7.19029	11.659	6.50896	6.36213	6.30413	9.98166	8.09398	12.1266
	7.19276	11.6609	6.51384	6.36282	6.30839	9.99233	8.10734	12.1793
	7.20013	11.7615	6.51798	6.36435	6.3204	10.0033	8.11076	12.1987
	7.20057	11.7795	6.51877	6.36524	6.32252	10.0101	8.11259	12.2148
	7.20635	11.8063	6.52434	6.36957	6.32351	10.0252	8.11614	12.2314
	7.21116	11.8081	6.52965	6.37001	6.32464	10.0266	8.11726	12.2444
	7.21288	11.8171	6.52971	6.37753	6.33804	10.0326	8.12164	12.2516
	7.22425	11.8675	6.53174	6.37761	6.33866	10.0877	8.1245	12.2545
	7.22472	11.9143	6.53178	6.38019	6.34054	10.0941	8.1262	12.2691
	7.23235	11.9179	6.53201	6.38815	6.34167	10.1039	8.13047	12.2722
	7.23644	11.9291	6.53653	6.39158	6.34348	10.1132	8.13873	12.2941
	7.24994	11.9457	6.53667	6.392	6.34899	10.1228	8.15102	12.2944
	7.25215	11.9668	6.53801	6.39229	6.34948	10.1375	8.15464	12.3193
	7.25707	12.0039	6.5389	6.39475	6.35524	10.1507	8.16119	12.3371
	7.26565	12.0089	6.54152	6.39686	6.35613	10.1542	8.20237	12.4029
	7.28215	12.0461	6.54553	6.3984	6.35977	10.1798	8.21461	12.4046
	7.28889	12.0614	6.56053	6.4041	6.37588	10.1901	8.21471	12.4263
	7.29613	12.1879	6.56482	6.40417	6.38199	10.2146	8.21756	12.4324
	7.29671	12.1906	6.56915	6.41091	6.39132	10.2155	8.22434	12.4684
	7.29827	12.1976	6.57079	6.41344	6.39343	10.2418	8.22672	12.5146
	7.3012	12.1998	6.58024	6.4169	6.39367	10.2456	8.22871	12.5614
	7.3047	12.2127	6.58052	6.41851	6.39778	10.282	8.24025	12.5893
	7.30503	12.2286	6.58154	6.41933	6.39781	10.3061	8.26564	12.6505
	7.30722	12.2392	6.58415	6.42412	6.40343	10.3206	8.27478	12.6848
	7.31826	12.3014	6.58474	6.42561	6.40458	10.3256	8.27697	12.6925
	7.32006	12.3023	6.58872	6.42577	6.40483	10.3316	8.29125	12.7021
	7.32181	12.3274	6.59248	6.43579	6.40705	10.3718	8.29482	12.7477
	7.32803	12.3437	6.59617	6.44542	6.40764	10.3754	8.29559	12.7736
	7.32864	12.3785	6.59777	6.44722	6.40881	10.3785	8.29758	12.7799
	7.33846	12.3803	6.59871	6.44825	6.41016	10.4097	8.30558	12.7823
	7.34028	12.4145	6.59915	6.45438	6.41748	10.417	8.32472	12.8479
	7.34171	12.4281	6.60156	6.45529	6.41893	10.4524	8.33273	12.8479
	7.34948	12.4726	6.60471	6.45564	6.42575	10.4538	8.33367	12.8667
	7.36724	12.5271	6.60912	6.45821	6.42776	10.4813	8.33668	12.8772
	7.37548	12.5329	6.60976	6.46013	6.43015	10.4866	8.36489	12.885
	7.37807	12.5925	6.62543	6.46186	6.44872	10.5025	8.36603	12.9027
	7.38378	12.6353	6.63502	6.46186	6.44928	10.5416	8.37129	12.9282
	7.38385	12.6503	6.64992	6.47058	6.46592	10.5593	8.39243	12.9363
	7.38698	12.6566	6.65125	6.47149	6.46636	10.5641	8.40782	12.9382
	7.39232	12.7303	6.65128	6.47321	6.46902	10.5693	8.41601	12.9434
	7.39306	12.7401	6.65571	6.47831	6.46926	10.6093	8.43381	12.9649
	7.39491	12.7663	6.65714	6.48109	6.47933	10.6756	8.44473	12.9665
	7.39505	12.7892	6.66458	6.48348	6.48245	10.6863	8.46244	13.0272
	7.39746	12.8018	6.66711	6.48404	6.48293	10.696	8.46977	13.0368
	7.40179	12.8577	6.66872	6.48616	6.4837	10.698	8.47024	13.0697
	7.40562	12.8959	6.67149	6.49391	6.48441	10.7099	8.48642	13.0949
	7.42202	12.9299	6.67727	6.49392	6.48775	10.8084	8.48782	13.1211
	7.42571	12.9614	6.67854	6.49508	6.4994	10.8128	8.48811	13.243
	7.44902	12.9705	6.67948	6.49727	6.50146	10.8263	8.50119	13.266
	7.45015	12.9848	6.69636	6.49851	6.50821	10.8313	8.50324	13.2919
	7.45071	13.0306	6.69674	6.51459	6.51567	10.8621	8.50921	13.3989
	7.45185	13.0309	6.70501	6.51565	6.52193	10.8703	8.51028	13.4039
	7.45835	13.0361	6.71869	6.52183	6.5291	10.8768	8.52118	13.4216
	7.45911	13.0754	6.72561	6.52489	6.53123	10.8978	8.52406	13.4415
	7.46401	13.0829	6.7258	6.52495	6.53309	10.9267	8.52843	13.4766
	7.46517	13.0843	6.73458	6.52858	6.53341	10.9584	8.53502	13.497
	7.48692	13.0895	6.73477	6.53475	6.53406	11.0004	8.54841	13.5035
	7.49555	13.0957	6.73721	6.53568	6.53597	11.0073	8.54955	13.5126
	7.49881	13.1042	6.7375	6.53815	6.544	11.0168	8.56313	13.5437
	7.50397	13.1243	6.74087	6.54151	6.54786	11.0273	8.56794	13.5534
	7.50607	13.1399	6.74417	6.54183	6.55061	11.0405	8.57083	13.5548
	7.51429	13.1708	6.74924	6.54847	6.55372	11.0601	8.58616	13.5752
	7.52432	13.1755	6.7574	6.55089	6.5607	11.068	8.59136	13.6057
	7.52794	13.2147	6.76538	6.55379	6.57361	11.0776	8.59162	13.6069
	7.54728	13.2558	6.77331	6.55725	6.57457	11.085	8.59264	13.6117
	7.54799	13.2674	6.77377	6.57787	6.57814	11.0897	8.59807	13.6291
	7.55806	13.2895	6.77488	6.57976	6.58365	11.1133	8.59969	13.6751
	7.55952	13.2955	6.78216	6.5833	6.58769	11.1535	8.61288	13.6836
	7.56061	13.3449	6.78262	6.58351	6.59342	11.2082	8.61956	13.6864
	7.56409	13.3451	6.78531	6.5839	6.59348	11.2283	8.63527	13.7832
	7.57238	13.4195	6.78744	6.58429	6.59628	11.2552	8.64149	13.8002
	7.5775	13.4361	6.79174	6.59182	6.59667	11.2677	8.67197	13.8238
	7.57753	13.4464	6.79201	6.59493	6.59851	11.2708	8.68386	13.868
	7.57955	13.4619	6.79382	6.5955	6.59989	11.2748	8.68544	13.8694
	7.59428	13.5004	6.79389	6.59684	6.6102	11.2867	8.6864	13.9299
	7.59578	13.5407	6.79464	6.59718	6.61604	11.2979	8.68682	13.952
	7.60243	13.5553	6.79518	6.60997	6.61745	11.3068	8.68812	13.9871
	7.60436	13.5857	6.79981	6.61	6.61945	11.3246	8.7101	13.993
	7.61381	13.5866	6.80328	6.6103	6.63349	11.3335	8.71736	14.006
	7.62616	13.6473	6.80522	6.61543	6.63355	11.3521	8.73137	14.0376
	7.63	13.6661	6.81685	6.6179	6.65718	11.3582	8.74323	14.0534
	7.63049	13.6968	6.83914	6.62537	6.6576	11.3614	8.76081	14.0551
	7.63217	13.7308	6.83943	6.63448	6.68767	11.3639	8.76528	14.0731
	7.64439	13.7453	6.84164	6.64133	6.68964	11.3929	8.79495	14.0788
	7.64989	13.8087	6.84264	6.64262	6.69692	11.397	8.79763	14.104
	7.65194	13.8136	6.84953	6.64521	6.71349	11.4214	8.79869	14.1497
	7.67192	13.8187	6.85413	6.64542	6.71901	11.4554	8.80088	14.1853
	7.68237	13.918	6.85465	6.64905	6.723	11.4574	8.8024	14.1952
	7.68398	13.9541	6.86132	6.65326	6.72748	11.4641	8.80365	14.2152
	7.68625	14.0115	6.86977	6.65721	6.73338	11.5198	8.82342	14.2224
	7.69471	14.059	6.8819	6.66583	6.7405	11.5373	8.8259	14.2691
	7.71859	14.0603	6.88907	6.67945	6.74457	11.5568	8.82955	14.2856
	7.72505	14.0698	6.8936	6.68238	6.74711	11.5683	8.84415	14.3122
	7.74084	14.1021	6.90372	6.68429	6.75026	11.5949	8.84629	14.3243
	7.74754	14.1233	6.91099	6.69729	6.76722	11.64	8.8538	14.3966
	7.75377	14.2243	6.91221	6.71391	6.76923	11.6479	8.85612	14.4158
	7.75605	14.3139	6.92056	6.71407	6.77467	11.6521	8.87087	14.5211
	7.76064	14.3616	6.92426	6.72366	6.77672	11.655	8.87187	14.5214
	7.76301	14.3988	6.92948	6.72612	6.79208	11.6717	8.87708	14.5847
	7.76442	14.407	6.93192	6.72874	6.79406	11.6839	8.88273	14.6651
	7.76631	14.4239	6.93286	6.72895	6.79488	11.7033	8.88575	14.6677
	7.77523	14.4426	6.9357	6.73009	6.80093	11.7296	8.88871	14.6742
	7.7843	14.4554	6.94126	6.73041	6.80344	11.7601	8.89002	14.7272
	7.79648	14.512	6.94185	6.73131	6.80861	11.7846	8.8929	14.7799
	7.80496	14.5217	6.94397	6.73189	6.82608	11.7861	8.89544	14.7979
	7.81017	14.5612	6.94725	6.73283	6.83231	11.7952	8.89961	14.8011
	7.81128	14.6521	6.95961	6.74147	6.83713	11.8211	8.91358	14.8337
	7.82507	14.6606	6.96312	6.74172	6.83731	11.8499	8.92414	14.8725
	7.84382	14.7412	6.97078	6.75179	6.84285	11.8857	8.92487	14.8865
	7.85273	14.7558	6.97312	6.75411	6.85481	11.8881	8.94245	14.9099
	7.85862	14.7742	6.97779	6.75865	6.85594	11.8899	8.9425	14.9127
	7.8631	14.8181	6.98422	6.76606	6.85969	11.9047	8.94371	14.928
	7.86422	14.8782	6.98756	6.77304	6.87389	11.9074	8.9527	14.9784
	7.86885	14.8838	6.98787	6.77714	6.87427	11.9132	8.96107	15.0157
	7.86972	14.9132	6.98803	6.77806	6.89305	11.9399	8.96677	15.071
	7.88029	14.9406	6.98839	6.78342	6.8995	11.9523	8.9691	15.1086
	7.89515	14.9949	6.99062	6.78732	6.92618	11.9802	8.97349	15.1599
	7.89544	15.0191	6.99435	6.79601	6.93312	12.0033	8.977	15.1826
	7.89774	15.0596	6.99714	6.79912	6.94265	12.0102	8.98748	15.1934
	7.91014	15.1161	7.01443	6.79927	6.94282	12.012	8.99017	15.2768
	7.91286	15.1488	7.02354	6.80135	6.94489	12.0224	8.99057	15.3257
	7.91523	15.1549	7.02856	6.80482	6.95076	12.029	8.99257	15.3258
	7.92778	15.1948	7.03881	6.80598	6.95461	12.0658	8.99261	15.3466
	7.94993	15.2277	7.03919	6.80792	6.95881	12.1128	8.99983	15.3842
	7.95205	15.3167	7.03958	6.80792	6.96334	12.1223	9.00201	15.4222
	7.95271	15.321	7.04049	6.80831	6.9748	12.1479	9.01197	15.4297
	7.95582	15.3512	7.04281	6.80853	6.98715	12.1615	9.01625	15.4497
	7.97531	15.4656	7.04847	6.82233	6.98928	12.2119	9.02368	15.5035
	7.9759	15.5064	7.05051	6.82755	6.99143	12.2425	9.04246	15.506
	7.97641	15.5087	7.05969	6.82916	6.99676	12.2866	9.04547	15.5083
	7.9776	15.5149	7.06111	6.83465	7.00169	12.2919	9.04697	15.5227
	7.98675	15.5342	7.06581	6.83658	7.00356	12.3567	9.04979	15.5408
	7.99218	15.5958	7.0792	6.84197	7.00514	12.3719	9.0706	15.5554
	8.00823	15.7659	7.087	6.84226	7.00923	12.4594	9.09793	15.5605
	8.01071	15.8366	7.08786	6.85049	7.01032	12.4913	9.10304	15.6495
	8.01628	15.8442	7.09098	6.85158	7.01112	12.4938	9.10904	15.6759
	8.02517	15.8457	7.09547	6.85289	7.01132	12.5057	9.11384	15.7086
	8.02973	15.8546	7.10021	6.86747	7.01982	12.5288	9.13266	15.7303
	8.03158	15.86	7.10158	6.87069	7.02076	12.5398	9.13432	15.7393
	8.03321	15.8662	7.10418	6.87262	7.02309	12.5636	9.13757	15.8002
	8.03874	15.9054	7.10564	6.8738	7.02927	12.5765	9.14426	15.8102
	8.06085	15.9611	7.10902	6.87775	7.04475	12.5854	9.14785	15.8367
	8.08157	15.9733	7.11762	6.87807	7.05972	12.5956	9.1568	15.8679
	8.09431	15.9846	7.11773	6.87948	7.06258	12.634	9.18558	15.8936
	8.09598	16.0338	7.11815	6.87965	7.06358	12.6731	9.19157	15.953
	8.10091	16.0463	7.12037	6.88287	7.06358	12.6843	9.1921	15.985
	8.10962	16.0734	7.12995	6.88533	7.0718	12.6962	9.19538	15.9941
	8.12169	16.091	7.13475	6.88543	7.10689	12.7133	9.2065	15.9992
	8.13471	16.1036	7.13624	6.88614	7.10809	12.7167	9.21692	16.0102
	8.13727	16.1556	7.13631	6.89308	7.11317	12.7174	9.21704	16.0235
	8.13851	16.2452	7.14607	6.89897	7.11579	12.726	9.22704	16.0818
	8.15588	16.2472	7.14776	6.92001	7.12309	12.7293	9.22967	16.1141
	8.16904	16.2883	7.15462	6.92137	7.12688	12.8275	9.25401	16.1371
	8.1745	16.3768	7.16588	6.92149	7.15303	12.8434	9.25643	16.1675
	8.17514	16.4553	7.17318	6.92585	7.15648	12.8464	9.2619	16.1926
	8.17692	16.4747	7.18036	6.92681	7.15986	12.8597	9.2754	16.2122
	8.18183	16.5433	7.18131	6.92741	7.1745	12.8992	9.27572	16.2142
	8.18615	16.5464	7.18261	6.92789	7.17589	12.9036	9.27943	16.2217
	8.18646	16.6179	7.19474	6.93026	7.17605	12.9189	9.2851	16.2956
	8.19839	16.6778	7.20146	6.93161	7.18258	12.9199	9.28646	16.3457
	8.20649	16.7082	7.21298	6.93332	7.18833	12.9436	9.30383	16.3523
	8.20992	16.7238	7.21846	6.93872	7.18915	13.0148	9.30591	16.3552
	8.21745	16.7483	7.22365	6.95314	7.19149	13.0325	9.31109	16.3673
	8.21835	16.7948	7.22874	6.9617	7.19187	13.0431	9.31728	16.39
	8.21885	16.7981	7.23338	6.96486	7.19739	13.0508	9.318	16.4581
	8.21937	16.8059	7.2338	6.96814	7.20326	13.0627	9.33922	16.4849
	8.22591	16.8345	7.23756	6.96899	7.21079	13.074	9.33982	16.4849
	8.23368	16.839	7.23902	6.97937	7.2154	13.0817	9.3554	16.4883
	8.23635	16.9187	7.24093	6.98096	7.2162	13.0914	9.35552	16.5078
	8.23769	16.9189	7.24136	6.98188	7.2173	13.1282	9.36289	16.528
	8.24234	16.927	7.24173	6.98324	7.21775	13.1726	9.36542	16.5614
	8.25826	17.0593	7.24805	6.98747	7.21915	13.2109	9.36569	16.5864
	8.27222	17.0764	7.25192	6.98868	7.22904	13.2171	9.36987	16.6257
	8.27418	17.1322	7.25754	6.9906	7.23022	13.2347	9.37726	16.6576
	8.27517	17.2134	7.25858	6.99696	7.23117	13.2565	9.37799	16.6807
	8.28648	17.2318	7.26582	6.99984	7.23119	13.275	9.39346	16.7179
	8.28755	17.2391	7.26895	7.00947	7.23274	13.3094	9.39859	16.733
	8.30196	17.2857	7.27525	7.01489	7.23538	13.3472	9.4005	16.7912
	8.3119	17.3395	7.29013	7.02151	7.23911	13.3493	9.42706	16.7916
	8.3191	17.5128	7.29405	7.02393	7.2511	13.4216	9.43536	16.8743
	8.32777	17.5205	7.29571	7.03886	7.25152	13.4509	9.45302	16.8854
	8.329	17.5763	7.2991	7.04107	7.25611	13.454	9.45458	16.9034
	8.33085	17.66	7.3022	7.04509	7.25828	13.4989	9.45979	16.9723
	8.34284	17.7506	7.30543	7.04736	7.27223	13.5124	9.47068	16.9993
	8.34459	17.7892	7.30603	7.04805	7.27252	13.5147	9.47077	17.0186
	8.34762	17.9728	7.30686	7.04876	7.29247	13.5153	9.48952	17.038
	8.35082	17.9766	7.3103	7.04979	7.29551	13.544	9.49323	17.0446
	8.35611	18.1161	7.31409	7.05102	7.30321	13.5723	9.4974	17.116
	8.35623	18.1685	7.31656	7.0591	7.30724	13.5725	9.49927	17.1674
	8.36732	18.1695	7.31895	7.0637	7.30743	13.627	9.50087	17.1792
	8.3771	18.1732	7.31989	7.06673	7.31233	13.6486	9.50675	17.2234
	8.39041	18.2414	7.33088	7.06817	7.3258	13.6555	9.50909	17.228
	8.39325	18.2798	7.33295	7.06971	7.33469	13.6611	9.51199	17.2572
	8.39616	18.3136	7.33805	7.07553	7.34387	13.6678	9.53574	17.2814
	8.40158	18.3404	7.33989	7.08014	7.34473	13.6717	9.54622	17.3076
	8.42284	18.4172	7.34028	7.08303	7.35218	13.6878	9.56604	17.3248
	8.42393	18.4288	7.34523	7.08307	7.35636	13.7031	9.57223	17.3682
	8.42535	18.4826	7.36304	7.0935	7.35696	13.7421	9.60053	17.5019
	8.42546	18.5347	7.36524	7.09659	7.36597	13.7606	9.62778	17.5763
	8.42876	18.5734	7.36608	7.09981	7.36771	13.7675	9.63534	17.5843
	8.4416	18.6063	7.36792	7.10078	7.37708	13.8183	9.65599	17.6133
	8.44196	18.7616	7.37072	7.10629	7.3814	13.8525	9.65764	17.6535
	8.44809	18.8254	7.3774	7.10744	7.38695	13.8711	9.65778	17.6902
	8.45067	18.8369	7.37787	7.1094	7.38767	13.9262	9.66169	17.7362
	8.46694	18.9259	7.3824	7.11237	7.40017	13.9347	9.66798	17.7398
	8.47067	18.9428	7.38521	7.11349	7.40644	13.9417	9.66814	17.7412
	8.49619	19.0793	7.38954	7.11482	7.42005	13.9636	9.67664	17.7825
	8.50115	19.0856	7.39875	7.11714	7.43105	13.9642	9.68219	17.802
	8.5418	19.0919	7.4203	7.12153	7.43204	14.0266	9.6837	17.8351
	8.54364	19.1358	7.42702	7.1267	7.43382	14.069	9.70259	17.8722
	8.5497	19.1816	7.43249	7.13339	7.43781	14.0914	9.70539	17.881
	8.55285	19.2079	7.43282	7.13737	7.44232	14.0919	9.70628	17.8997
	8.56483	19.2174	7.43787	7.14162	7.44545	14.0952	9.70957	17.9192
	8.59943	19.2911	7.44081	7.14173	7.45898	14.1197	9.71091	17.971
	8.60739	19.3211	7.44149	7.15459	7.46024	14.1525	9.71455	17.9974
	8.61025	19.355	7.44249	7.15618	7.46105	14.2122	9.7409	18.043
	8.62705	19.3811	7.45247	7.1562	7.46393	14.2452	9.74368	18.0652
	8.62868	19.4825	7.45854	7.1646	7.47645	14.2777	9.74652	18.0879
	8.64033	19.7346	7.45968	7.17006	7.48736	14.2965	9.74906	18.0991
	8.64955	19.7552	7.46882	7.17228	7.49237	14.3332	9.78205	18.1698
	8.65239	19.7594	7.47309	7.17635	7.49548	14.3517	9.789	18.2881
	8.65694	19.7773	7.47463	7.17999	7.49812	14.5031	9.79303	18.3652
	8.66621	19.89	7.50926	7.1808	7.50972	14.542	9.80643	18.3824
	8.67019	19.9581	7.50998	7.18392	7.51096	14.5499	9.82056	18.4726
	8.6743	20.0494	7.51131	7.19408	7.52533	14.5776	9.82961	18.4743
	8.68002	20.1537	7.51657	7.19613	7.53687	14.5924	9.83848	18.4902
	8.68892	20.2096	7.51659	7.19841	7.54128	14.614	9.84578	18.5585
	8.6922	20.246	7.52574	7.21813	7.54538	14.6187	9.84902	18.5702
	8.69593	20.247	7.53055	7.219	7.55467	14.6347	9.85536	18.5721
	8.70828	20.3437	7.53239	7.2272	7.56193	14.6689	9.85791	18.5846
	8.70895	20.6581	7.53371	7.23304	7.56378	14.7128	9.86501	18.612
	8.71129	20.854	7.54949	7.23563	7.57412	14.715	9.87242	18.6212
	8.72306	20.9123	7.55021	7.23718	7.57646	14.7298	9.87242	18.6319
	8.73487	21.0313	7.55345	7.24088	7.57693	14.8098	9.89875	18.7036
	8.7358	21.0394	7.56415	7.24404	7.57713	14.91	9.90583	18.7111
	8.74464	21.1407	7.57495	7.24511	7.58215	14.9628	9.91211	18.7543
	8.75341	21.181	7.59039	7.24571	7.58222	14.9634	9.91268	18.7636
	8.75609	21.233	7.59311	7.24588	7.58357	15.0034	9.91342	18.8487
	8.75883	21.3145	7.59533	7.24828	7.5896	15.0493	9.95687	18.8878
	8.76791	21.4139	7.59768	7.25472	7.59338	15.0517	9.95754	18.8879
	8.77152	21.4759	7.60193	7.25653	7.59491	15.064	9.95864	18.9988
	8.78674	21.544	7.6082	7.25956	7.59897	15.1151	9.96342	19.0619
	8.78856	21.5704	7.61215	7.25992	7.61324	15.1435	10.0138	19.0928
	8.7988	21.8128	7.61602	7.27662	7.62352	15.319	10.036	19.2211
	8.80209	21.8258	7.61914	7.27861	7.6341	15.366	10.0386	19.2658
	8.80823	21.9992	7.62306	7.286	7.63889	15.4192	10.0416	19.2778
	8.83396	22.288	7.62435	7.29166	7.64464	15.4202	10.0452	19.3299
	8.84323	22.3404	7.63121	7.29201	7.64718	15.4343	10.0526	19.3527
	8.84437	22.3774	7.63482	7.30536	7.65071	15.456	10.0622	19.3559
	8.85895	22.3774	7.63553	7.3054	7.65423	15.5204	10.0679	19.3592
	8.86108	22.5924	7.63634	7.30577	7.65582	15.5325	10.0801	19.4096
	8.86406	22.6131	7.63733	7.30669	7.66478	15.5379	10.0919	19.5193
	8.87787	22.7415	7.63851	7.30734	7.66557	15.5745	10.0964	19.7467
	8.92201	22.7964	7.63987	7.31682	7.67119	15.5953	10.0965	19.7508
	8.92788	22.8389	7.64506	7.31746	7.67742	15.6187	10.0989	19.8297
	8.92871	22.8878	7.64824	7.3264	7.67921	15.6915	10.1039	19.8995
	8.93101	22.9368	7.65073	7.3314	7.68755	15.7094	10.1076	19.9749
	8.93252	23.695	7.6545	7.33247	7.68952	15.7132	10.1142	20.0007
	8.9493	23.7389	7.65895	7.33528	7.75318	15.7146	10.1146	20.112
	8.94966	24.3581	7.6605	7.34933	7.75881	15.7464	10.1168	20.1862
	8.9528	24.4045	7.66079	7.3542	7.75892	15.773	10.1248	20.2219
	8.95835	24.5253	7.68289	7.35931	7.75949	15.8265	10.1251	20.2497
	8.95938	24.7404	7.69419	7.36078	7.76017	15.8961	10.1456	20.3058
	8.961	24.8598	7.69695	7.36151	7.76147	16.0174	10.1506	20.309
	8.96836	24.865	7.70103	7.36202	7.76469	16.0386	10.1665	20.4505
	8.9752	24.951	7.70814	7.36218	7.77477	16.0471	10.1707	20.4952
	8.99256	25.0145	7.71443	7.36654	7.77776	16.0911	10.1708	20.5143
	8.99259	25.2757	7.71983	7.37167	7.78055	16.1013	10.2068	20.6825
	9.01469	25.3265	7.72007	7.37348	7.78366	16.1125	10.2078	20.7201
	9.01919	25.3619	7.72704	7.37648	7.79818	16.1318	10.2155	20.7906
	9.01982	25.5417	7.73107	7.37793	7.80556	16.1736	10.2242	20.8744
	9.02001	25.8447	7.75008	7.38175	7.80742	16.1957	10.2279	20.8873
	9.0208	25.8985	7.7508	7.38976	7.83763	16.2054	10.2298	20.9208
	9.03493	26.2572	7.75097	7.39427	7.87838	16.2152	10.2479	20.9663
	9.03744	26.3651	7.75223	7.39667	7.89248	16.2259	10.2705	21.0077
	9.06325	26.4957	7.76444	7.39763	7.89621	16.2558	10.2816	21.2026
	9.07806	26.9139	7.76981	7.40035	7.89941	16.2683	10.2832	21.2197
	9.08225	26.9514	7.78947	7.4018	7.92532	16.3468	10.2888	21.2349
	9.08485	27.4505	7.7895	7.41127	7.92892	16.3933	10.2926	21.4173
	9.10224	27.7028	7.79309	7.42115	7.93664	16.4013	10.2978	21.4321
	9.1094	27.74	7.80387	7.42353	7.94951	16.4442	10.3025	21.4719
	9.11308	28.6423	7.80775	7.42634	7.95465	16.5038	10.3077	21.4845
	9.12046	28.6859	7.81721	7.43288	7.9576	16.5157	10.3274	21.5268
	9.12548	28.9934	7.82006	7.43765	7.95787	16.5425	10.333	21.6616
	9.12962	30.7439	7.82055	7.44524	7.95986	16.5707	10.351	21.8162
	9.13855	30.8526	7.82282	7.4472	7.96332	16.6706	10.3568	21.8293
	9.14864	31.293	7.8277	7.45045	7.96615	16.6824	10.3614	21.9616
	9.15454	34.6969	7.83029	7.45132	7.96783	16.6863	10.3647	21.9661
	9.15735	36.1515	7.83324	7.45915	7.9761	16.7416	10.3836	22.0073
	9.159	36.7765	7.83874	7.46627	7.97809	16.8307	10.3886	22.0411
	9.17525	37.5166	7.84547	7.47872	7.99579	16.8405	10.4204	22.0429
	9.18073	37.6662	7.84595	7.48422	7.99666	16.923	10.4297	22.0432
	9.18157	55.3687	7.84678	7.49239	7.99731	16.947	10.4421	22.0557
	9.18396		7.84926	7.49386	8.00548	16.9806	10.444	22.0669
	9.18813		7.85624	7.49818	8.01882	16.9907	10.4789	22.145
	9.21027		7.86853	7.5033	8.02057	16.9985	10.4914	22.1624
	9.219		7.8781	7.50954	8.02498	17.0463	10.5163	22.2761
	9.23245		7.88298	7.51966	8.02776	17.0504	10.5189	22.3422
	9.24085		7.89415	7.52233	8.02812	17.0588	10.5387	22.3898
	9.24403		7.89586	7.5225	8.03062	17.0814	10.5533	22.4322
	9.27711		7.90723	7.52289	8.04943	17.1106	10.5574	22.4766
	9.28697		7.9087	7.54636	8.05209	17.1473	10.564	22.5032
	9.32324		7.91722	7.54693	8.05682	17.1507	10.5859	22.7711
	9.32983		7.92134	7.5473	8.0823	17.1923	10.637	22.8561
	9.33026		7.92145	7.5488	8.08608	17.2614	10.6611	22.8678
	9.33172		7.94958	7.55142	8.08747	17.3183	10.6674	22.8843
	9.33242		7.95198	7.5625	8.09586	17.3428	10.6728	22.9736
	9.33265		7.95368	7.56389	8.11008	17.3459	10.6758	22.9797
	9.33528		7.97013	7.5703	8.11386	17.3555	10.6793	23.2543
	9.35837		7.97427	7.57091	8.11938	17.396	10.6985	23.3169
	9.36298		7.97831	7.57124	8.12636	17.5232	10.6986	23.4332
	9.36317		7.98509	7.57215	8.14016	17.5466	10.7628	23.6268
	9.37316		7.98774	7.57431	8.14056	17.565	10.7683	23.6679
	9.37359		7.99586	7.57494	8.1444	17.5834	10.8203	23.8937
	9.39322		8.00791	7.57625	8.15954	17.7136	10.8704	24.1302
	9.39398		8.00858	7.57801	8.15963	17.7403	10.8834	24.1745
	9.40291		8.01372	7.57832	8.17275	17.7569	10.904	24.8409
	9.40504		8.01378	7.59893	8.18152	17.7709	10.9134	25.1823
	9.42913		8.02938	7.5994	8.18154	17.7742	10.9577	25.1883
	9.442		8.03644	7.60015	8.19546	17.8146	10.9612	25.4908
	9.44646		8.03749	7.6076	8.19609	17.9074	10.9624	25.681
	9.46225		8.0375	7.60906	8.20026	17.9173	10.9679	25.7923
	9.46294		8.04478	7.61539	8.20247	17.9949	10.9689	25.9146
	9.47216		8.04622	7.62133	8.21111	18.0068	11.0141	25.965
	9.47291		8.04752	7.6224	8.21122	18.0263	11.0141	25.9826
	9.47444		8.05484	7.62482	8.22702	18.0953	11.0248	26.1281
	9.49345		8.07126	7.63346	8.22764	18.1058	11.0713	26.2086
	9.50542		8.07337	7.63372	8.23254	18.1141	11.074	26.3973
	9.52086		8.07556	7.63865	8.23338	18.1209	11.0883	26.4339
	9.5234		8.07652	7.64688	8.25675	18.1255	11.0883	26.4844
	9.52945		8.07665	7.65164	8.2569	18.1579	11.1	26.5211
	9.5454		8.07711	7.6561	8.26955	18.2611	11.1451	27.0104
	9.54805		8.0814	7.66221	8.29415	18.3491	11.1616	27.2611
	9.56354		8.08285	7.66323	8.30595	18.3643	11.198	27.6407
	9.56837		8.08984	7.66491	8.30939	18.4492	11.218	29.2135
	9.57096		8.09748	7.66935	8.31162	18.5545	11.2186	30.0116
	9.57867		8.10192	7.67724	8.31325	18.5751	11.2518	30.1103
	9.59416		8.10787	7.68338	8.32797	18.681	11.2564	30.1343
	9.60548		8.11454	7.68368	8.33267	18.6847	11.2564	31.2866
	9.62274		8.12133	7.68386	8.33892	18.75	11.2653	31.3616
	9.62288		8.1296	7.68681	8.35964	18.7956	11.2957	31.3772
	9.65503		8.1302	7.68762	8.37241	18.8026	11.3304	32.2694
	9.67756		8.13774	7.68871	8.37866	18.8285	11.3692	32.3557
	9.68015		8.14922	7.6955	8.39184	18.8603	11.3963	32.6062
	9.68669		8.16432	7.696	8.40237	19.0867	11.4118	32.6585
	9.70427		8.16529	7.69647	8.40511	19.1658	11.4177	33.8169
	9.72013		8.17394	7.69658	8.4066	19.1983	11.4945	35.5092
	9.74381		8.17496	7.69841	8.40954	19.2461	11.5523	36.438
	9.75001		8.1848	7.69946	8.41255	19.2895	11.5576	38.9782
	9.77736		8.19471	7.70075	8.42294	19.3397	11.5839	40.4683
	9.77819		8.20067	7.70537	8.4238	19.4078	11.5863	47.5885
	9.77919		8.20256	7.70698	8.43219	19.478	11.5918
	9.77958		8.21308	7.70767	8.46334	19.5259	11.5995
	9.78108		8.22006	7.70848	8.46908	19.545	11.6076
	9.78523		8.23532	7.71061	8.47099	19.6405	11.6245
	9.78886		8.23569	7.71598	8.47588	19.6513	11.6265
	9.82943		8.24306	7.71772	8.4761	19.6621	11.6721
	9.83053		8.25562	7.72169	8.4826	19.6882	11.685
	9.85695		8.26835	7.72459	8.48972	19.7526	11.7115
	9.87304		8.26853	7.72832	8.49966	19.7742	11.7248
	9.88818		8.26912	7.73135	8.50358	19.8131	11.756
	9.89299		8.27686	7.73568	8.51178	19.8278	11.7717
	9.90506		8.27922	7.73818	8.51363	19.8304	11.8064
	9.91472		8.28051	7.73867	8.51738	19.863	11.8155
	9.91683		8.28313	7.74003	8.51942	19.911	11.8599
	9.93361		8.29022	7.74486	8.52731	19.9572	11.8732
	9.9399		8.29104	7.75426	8.53474	19.9835	12.0884
	9.94243		8.31199	7.75577	8.54565	20.0096	12.1044
	9.95932		8.3286	7.75676	8.55286	20.1384	12.1062
	9.99357		8.33022	7.76363	8.55381	20.2718	12.1193
	10.001		8.33206	7.76452	8.56099	20.2964	12.1485
	10.0035		8.3336	7.77308	8.56613	20.313	12.1629
	10.0081		8.33417	7.77535	8.57183	20.4255	12.1698
	10.0217		8.35042	7.77623	8.57368	20.5047	12.1747
	10.0253		8.35167	7.78457	8.60357	20.5523	12.2024
	10.0282		8.36513	7.78638	8.6053	20.6348	12.2039
	10.0599		8.37	7.79675	8.62309	20.8137	12.2183
	10.066		8.38072	7.79927	8.64976	20.8788	12.2454
	10.0878		8.41798	7.80039	8.6521	20.9291	12.2541
	10.0907		8.429	7.81627	8.67286	20.9678	12.2574
	10.0925		8.43032	7.82205	8.69885	20.9994	12.2862
	10.0973		8.43306	7.82957	8.7111	21.0374	12.374
	10.1122		8.4453	7.83192	8.72194	21.3177	12.42
	10.1277		8.45914	7.83306	8.74852	21.4147	12.4613
	10.1317		8.46689	7.8358	8.75564	21.4864	12.4986
	10.1492		8.46824	7.84074	8.76596	21.51	12.5599
	10.1601		8.46927	7.84158	8.79885	21.6814	12.6355
	10.1838		8.48561	7.84224	8.8047	21.6953	12.6859
	10.1894		8.48925	7.84354	8.81074	21.7705	12.7014
	10.1968		8.49206	7.84513	8.82667	21.8139	12.8203
	10.2149		8.49218	7.85309	8.85428	21.8185	12.8612
	10.2475		8.50026	7.85467	8.85784	21.8877	12.8761
	10.25		8.51338	7.85511	8.86535	21.895	12.8944
	10.2509		8.51371	7.85684	8.87002	21.9154	13.0361
	10.2564		8.52396	7.859	8.87889	21.921	13.0444
	10.2734		8.52826	7.86966	8.88024	21.9415	13.1295
	10.2804		8.52974	7.8746	8.89573	21.9596	13.1483
	10.2817		8.53099	7.87714	8.91616	21.9691	13.1525
	10.2836		8.5365	7.88078	8.91859	22.2134	13.1636
	10.297		8.53711	7.88251	8.92527	22.4226	13.1715
	10.3019		8.53788	7.8838	8.92725	22.4764	13.1735
	10.3196		8.53823	7.88381	8.96569	22.5307	13.1846
	10.3254		8.53943	7.88614	8.9694	22.5363	13.3082
	10.3274		8.54282	7.89614	8.98534	22.5766	13.3673
	10.3418		8.54335	7.89664	8.99503	22.6231	13.3695
	10.3581		8.55656	7.89734	9.00045	22.6702	13.4207
	10.3592		8.5581	7.89921	9.00071	22.6722	13.4279
	10.3721		8.56765	7.90356	9.00181	22.7355	13.4979
	10.3749		8.57963	7.90421	9.0081	22.9464	13.552
	10.3854		8.59237	7.90694	9.01044	22.9685	13.5883
	10.4071		8.60699	7.90914	9.02356	22.9911	13.6422
	10.4122		8.61477	7.91565	9.05278	23.0367	13.7409
	10.415		8.6154	7.91891	9.05665	23.1199	13.8511
	10.4162		8.61879	7.92197	9.06008	23.3361	13.8934
	10.4207		8.62645	7.92808	9.06646	23.458	13.996
	10.4551		8.64556	7.92965	9.07723	23.5408	14.0233
	10.4552		8.65197	7.93359	9.08136	23.5693	14.0285
	10.4711		8.65456	7.93947	9.08955	23.6988	14.0354
	10.5002		8.65605	7.9478	9.09737	23.9571	14.3778
	10.5102		8.66812	7.95194	9.09913	24.0348	14.6543
	10.511		8.6818	7.95289	9.11012	24.6343	15.1618
	10.5453		8.68414	7.95842	9.11447	24.6451	15.6709
	10.5761		8.68435	7.9589	9.1148	24.8965	16.016
	10.6471		8.68867	7.96721	9.11501	24.9986	16.0796
	10.7737		8.68894	7.96841	9.16205	25.1462	19.2608
	10.867		8.69657	7.97067	9.16923	25.6578
	10.8737		8.69787	7.97206	9.1747	25.7805
	10.874		8.70559	7.9894	9.18059	25.8257
	10.8754		8.70583	7.9933	9.25657	26.1938
	10.8865		8.70629	7.99733	9.27893	26.617
	10.9213		8.71982	8.01604	9.29097	26.6925
	10.9288		8.7244	8.01951	9.30166	26.8035
	10.9695		8.72451	8.0233	9.31774	26.991
	10.9937		8.74557	8.02499	9.33921	27.0556
	11.0381		8.74913	8.02666	9.34284	27.0696
	11.0642		8.75323	8.02756	9.34575	27.485
	11.0938		8.75681	8.02838	9.353	27.5913
	11.1068		8.77035	8.02928	9.3574	27.8476
	11.1338		8.78811	8.03026	9.36189	28.2989
	11.2243		8.79502	8.03292	9.36381	30.1264
	11.2704		8.79517	8.04117	9.36964	30.1951
	11.2742		8.79709	8.06605	9.4073	30.477
	11.2785		8.81727	8.079	9.41095	30.8042
	11.2985		8.81735	8.0818	9.42966	31.1009
	11.3401		8.81791	8.08379	9.44204	31.6892
	11.3809		8.83973	8.08798	9.44594	31.7165
	11.3936		8.8505	8.08842	9.46157	31.9631
	11.3981		8.85061	8.09042	9.46909	32.2057
	11.4185		8.86373	8.09066	9.49534	32.2426
	11.4419		8.88225	8.09474	9.54505	33.3798
	11.448		8.88441	8.10392	9.55411	33.5629
	11.4537		8.89203	8.10757	9.57545	34.1674
	11.5307		8.89358	8.10969	9.59469	35.3433
	11.5971		8.92201	8.11236	9.60392	35.3701
	11.6463		8.92257	8.11819	9.63021	35.4254
	11.6502		8.93052	8.11861	9.63604	35.7342
	11.6948		8.93452	8.12948	9.64008	35.8986
	11.715		8.94984	8.13382	9.65077	37.0432
	11.7216		8.95134	8.14007	9.69807	41.8068
	11.77		8.95346	8.14417	9.77112	42.9422
	11.7816		8.95466	8.15161	9.77679	46.0817
	11.9011		8.9548	8.16251	9.78213	49.9919
	11.9699		8.97536	8.16549	9.82205
	12.0395		8.9757	8.16783	9.90517
	12.0653		8.97868	8.16979	9.91852
	12.1113		8.97978	8.17344	9.96696
	12.1396		8.98457	8.18471	10.0001
	12.1454		8.9889	8.18508	10.0149
	12.2532		8.99166	8.20518	10.0308
	12.5294		8.99745	8.20554	10.0452
	12.532		9.00542	8.20794	10.0897
	12.5479		9.02321	8.21072	10.1138
	12.9592		9.02722	8.21078	10.1687
	13.5989		9.02745	8.21299	10.3019
	13.6539		9.03517	8.22135	10.5378
	13.8089		9.04752	8.22136	10.9492
	14.1953		9.04944	8.22457	11.4322
	14.7023		9.05177	8.22493	12.3992
	15.6163		9.06498	8.22672	15.0813
	18.3429		9.07818	8.22853
			9.07846	8.22942
			9.0995	8.24223
			9.10433	8.2492
			9.10507	8.25094
			9.10537	8.25204
			9.12818	8.25238
			9.12891	8.25928
			9.13441	8.26378
			9.13909	8.27022
			9.14822	8.27064
			9.149	8.27104
			9.16005	8.27218
			9.16524	8.28603
			9.16609	8.28624
			9.16948	8.29249
			9.17507	8.29811
			9.18998	8.2995
			9.20138	8.30503
			9.20213	8.31073
			9.20218	8.31995
			9.20619	8.32471
			9.21472	8.33319
			9.21753	8.34404
			9.21984	8.34424
			9.22687	8.34498
			9.23418	8.35291
			9.25056	8.35574
			9.26201	8.35728
			9.26444	8.36219
			9.26756	8.36252
			9.27175	8.36379
			9.27229	8.3689
			9.27834	8.37398
			9.27847	8.38357
			9.28369	8.38627
			9.31356	8.40022
			9.31367	8.40543
			9.32248	8.4094
			9.32917	8.4114
			9.3365	8.41182
			9.35785	8.41341
			9.37461	8.41397
			9.38419	8.41587
			9.4028	8.41771
			9.40973	8.42023
			9.45571	8.424
			9.45857	8.42455
			9.45997	8.42932
			9.49554	8.43241
			9.50363	8.43442
			9.50769	8.43447
			9.50949	8.44334
			9.51538	8.4488
			9.52928	8.4514
			9.53339	8.45403
			9.54278	8.45942
			9.55978	8.46186
			9.57319	8.46427
			9.58435	8.46858
			9.60426	8.46887
			9.61736	8.47318
			9.63269	8.47398
			9.64145	8.47885
			9.64367	8.48334
			9.64397	8.48588
			9.64897	8.49613
			9.66046	8.49659
			9.6628	8.50345
			9.66629	8.51228
			9.70468	8.51426
			9.70725	8.51725
			9.71103	8.52136
			9.72176	8.53271
			9.73738	8.53477
			9.743	8.54219
			9.74612	8.54309
			9.75796	8.54387
			9.77112	8.54493
			9.77936	8.5506
			9.78194	8.55436
			9.79038	8.55725
			9.8158	8.55891
			9.81935	8.56403
			9.82967	8.56857
			9.83311	8.57067
			9.83828	8.57152
			9.84064	8.57369
			9.8592	8.57403
			9.86027	8.58094
			9.88847	8.59317
			9.8929	8.60393
			9.8967	8.60532
			9.90498	8.61297
			9.90791	8.61401
			9.91802	8.61425
			9.92094	8.61455
			9.92837	8.61793
			9.9369	8.61983
			9.94821	8.62316
			9.95177	8.63015
			9.95584	8.63109
			9.96322	8.63639
			9.9654	8.65515
			9.97989	8.65685
			9.98306	8.6584
			9.98402	8.66271
			10.0172	8.66415
			10.0238	8.66889
			10.0302	8.6723
			10.0436	8.67333
			10.0507	8.67401
			10.0793	8.68351
			10.0922	8.68771
			10.094	8.6915
			10.1003	8.69726
			10.1073	8.70505
			10.1088	8.71116
			10.1162	8.71502
			10.1183	8.71957
			10.1223	8.72236
			10.1286	8.73444
			10.1366	8.73794
			10.1727	8.74761
			10.1797	8.75093
			10.1864	8.75722
			10.19	8.76008
			10.2122	8.76217
			10.2156	8.77813
			10.2311	8.78218
			10.2445	8.79305
			10.2553	8.80009
			10.2737	8.8012
			10.2763	8.80213
			10.3166	8.80342
			10.3202	8.81294
			10.3382	8.81866
			10.3713	8.84003
			10.3717	8.84748
			10.3892	8.87041
			10.4137	8.87375
			10.4427	8.88914
			10.4468	8.88964
			10.4514	8.89148
			10.4962	8.89399
			10.509	8.90854
			10.5303	8.91549
			10.5467	8.92147
			10.5962	8.92225
			10.5985	8.92503
			10.601	8.93572
			10.6095	8.94723
			10.6116	8.95224
			10.6351	8.95637
			10.6436	8.97188
			10.6442	9.0003
			10.6725	9.00877
			10.6998	9.01505
			10.7016	9.01673
			10.7304	9.03181
			10.745	9.03399
			10.7754	9.04111
			10.7977	9.05549
			10.8083	9.05763
			10.8126	9.05775
			10.8368	9.05952
			10.838	9.07068
			10.8825	9.07511
			10.8933	9.07755
			10.8966	9.08134
			10.9452	9.08275
			10.9525	9.08419
			10.9527	9.08733
			10.9544	9.08912
			10.9553	9.09281
			10.984	9.11776
			10.9876	9.12403
			11.0138	9.12563
			11.0415	9.13312
			11.0547	9.14099
			11.0627	9.15129
			11.1188	9.17167
			11.1327	9.17417
			11.1579	9.17475
			11.1708	9.17837
			11.1776	9.19476
			11.179	9.20103
			11.2011	9.20307
			11.2075	9.20848
			11.2238	9.21035
			11.2672	9.21188
			11.2838	9.21247
			11.3373	9.21647
			11.3575	9.21953
			11.3651	9.21963
			11.4297	9.22005
			11.4306	9.22206
			11.4449	9.23129
			11.4597	9.23349
			11.5345	9.2394
			11.5464	9.25846
			11.5568	9.25855
			11.6098	9.26325
			11.6117	9.27235
			11.6542	9.28708
			11.6826	9.33297
			11.8713	9.33546
			11.8865	9.33794
			11.9155	9.34283
			11.9961	9.35167
			12.0218	9.35186
			12.05	9.36663
			12.0594	9.37094
			12.0611	9.37359
			12.1181	9.37637
			12.3418	9.38671
			12.5575	9.39066
			12.6336	9.39381
			13.2805	9.40434
			14.9034	9.41228
			17.4493	9.41528
				9.43635
				9.44314
				9.44995
				9.46722
				9.46768
				9.47447
				9.48064
				9.4862
				9.50542
				9.51082
				9.51098
				9.51394
				9.51745
				9.52373
				9.52598
				9.52766
				9.52822
				9.53398
				9.53926
				9.54023
				9.54756
				9.56297
				9.58193
				9.58433
				9.59437
				9.62017
				9.63008
				9.63045
				9.64438
				9.65754
				9.6782
				9.70785
				9.70911
				9.71588
				9.71791
				9.7202
				9.74076
				9.74842
				9.75513
				9.76347
				9.76974
				9.7784
				9.78976
				9.79113
				9.79708
				9.80269
				9.81196
				9.82367
				9.83115
				9.84447
				9.84733
				9.84978
				9.85617
				9.8567
				9.85773
				9.86921
				9.86994
				9.89031
				9.90577
				9.90675
				9.9093
				9.91091
				9.92127
				9.93227
				9.93572
				9.93591
				9.93897
				9.94042
				9.94172
				9.94487
				9.9802
				9.98429
				9.98791
				10.0038
				10.0224
				10.0307
				10.0402
				10.0479
				10.0659
				10.0961
				10.0971
				10.1027
				10.1069
				10.1193
				10.1218
				10.1284
				10.133
				10.1534
				10.1831
				10.1953
				10.2255
				10.2284
				10.2442
				10.2492
				10.2551
				10.2576
				10.2596
				10.2666
				10.2798
				10.2954
				10.3019
				10.3138
				10.3205
				10.3337
				10.365
				10.3913
				10.4002
				10.414
				10.4146
				10.4273
				10.4353
				10.4367
				10.4548
				10.4593
				10.48
				10.4875
				10.4892
				10.5036
				10.5412
				10.5712
				10.5915
				10.5928
				10.5959
				10.5971
				10.6047
				10.6358
				10.6676
				10.669
				10.6764
				10.6921
				10.7036
				10.7134
				10.7596
				10.7624
				10.7666
				10.8076
				10.8172
				10.8222
				10.8223
				10.8393
				10.8393
				10.8935
				10.894
				10.9583
				10.9608
				10.9686
				10.9818
				11.0564
				11.0568
				11.0698
				11.0992
				11.1012
				11.1326
				11.1332
				11.1338
				11.1708
				11.1922
				11.201
				11.2108
				11.226
				11.2529
				11.2796
				11.2796
				11.3251
				11.4153
				11.4647
				11.4654
				11.481
				11.4864
				11.5419
				11.6024
				11.6072
				11.6484
				11.6508
				11.6835
				11.7522
				11.7727
				11.9844
				12.108
				12.1172
				12.2077
				12.3044
				12.3845
				12.3932
				12.4872
				12.549
				12.5929
				12.7534
				12.8502
				12.9928
				14.7727
				16.0192
				16.465
