# Supplementary material for: PomX, a ParA/MinD ATPase activating protein, is a triple regulator of cell division in Myxococcus xanthus
Source: eLife. 2021 Mar 18;10:e66160. doi: 10.7554/eLife.66160 (PMC7993993; doi:10.7554/eLife.66160)
Supplement: Figure 2—figure supplement 1—source data 1. [file elife-66160-fig2-figsupp1-data1.xlsx]

## Sheet: Figure 2_Source data 10
Source data for Figure 1_figure supplement 1A
	Lane										Lane
	1	not relevant									1	Marker
	2	Marker									2	PomXC-Strep
	3	PomX-His6
	4	PomXN-His6
	5	PomXC-His6
	6	PomXK13AR15A-His6
	7	PomXNK13AR15A-His6
	8	PomXN-Strep
	9	PomY-His6
	10	His6-PomZ
