# Supplementary material for: PomX, a ParA/MinD ATPase activating protein, is a triple regulator of cell division in Myxococcus xanthus
Source: eLife. 2021 Mar 18;10:e66160. doi: 10.7554/eLife.66160 (PMC7993993; doi:10.7554/eLife.66160)
Supplement: Figure 2—figure supplement 1—source data 2. [file elife-66160-fig2-figsupp1-data2.xlsx]

## Sheet: Figure 2_Source data 11
Source data for Figure 2_figure supplement 1B
													Lane
													1	Marker
													2	Supernatant	PomX-His6
													3	Pellet	PomX-His6
													4	Supernatant	PomY-His6
													5	Pellet	PomY-His6
													6	Supernatant	PomX-His6+PomY-His6
													7	Pellet	PomX-His6+PomY-His6
													8	Supernatant	PomXC-His6
													9	Pellet	PomXC-His6
													10	Supernatant	PomY-His6+PomXC-His6
													11	Pellet	PomY-His6+PomXC-His6
												Quantifications	Lane
												PomX
												Supernatant PomX-His6	2	750042	10738602	6.98454
												Pellet PomX-His6	3	9988560		93.0155
												Supernatant PomX-His6 + PomY-His6	6	1749284	6137196	28.503
												Pellet PomX-His6 + PomY-His6	7	4387912		71.497
												PomXC
												Supernatant PomXC-His6	8	966305	10709643	9.02276
												Pellet PomXC-His6	9	9743338		90.9772
												Supernatant PomY-His6+PomXC-His6	10	4673882	19764341	23.6481
												Pellet PomY-His6+PomXC-His6	11	15090459		76.3519
												PomY
												Supernatant PomY-His6	4	7429154	11392329	65.2119
												Pellet PomY-His6	5	3963175		34.7881
												Supernatant PomX-His6 + PomY-His6	6	7040054	13730865	51.2717
												Pellet PomX-His6 + PomY-His6	7	6690811		48.7283
												Supernatant PomY-His6+PomXC-His6	10	8521861	16252794	52.4332
												Pellet PomY-His6+PomXC-His6	11	7730933		47.5668
