# Supplementary material for: PomX, a ParA/MinD ATPase activating protein, is a triple regulator of cell division in Myxococcus xanthus
Source: eLife. 2021 Mar 18;10:e66160. doi: 10.7554/eLife.66160 (PMC7993993; doi:10.7554/eLife.66160)
Supplement: Figure 2—figure supplement 1—source data 3. [file elife-66160-fig2-figsupp1-data3.xlsx]

## Sheet: Figure 2_Source data 12
Source data for Figure 2_figure supplement 1C
														Lane
														1	Marker
														2	Supernatant	PomX-His6
														3	Pellet	PomX-His6
														4	Supernatant	PomX-His6+PomY-His6
														5	Pellet	PomX-His6+PomY-His6
														6	Supernatant	PomXN-His6
														7	Pellet	PomXN-His6
														8	Supernatant	PomY-His6+PomXN-His6
														9	Pellet	PomY-His6+PomXN-His6
														10	Supernatant	PomY-His6
														11	Pellet	PomY-His6
														Quantifications	Lane
														PomXs			Summe (100%)	%
														Supernatant PomX-His6	2	344.263	7468.66	4.60943
														Pellet PomX-His6	3	7124.4		95.3906
														Supernatant PomX-His6 + PomY-His6	4	950.87	6592	14.4246
														Pellet PomX-His6 + PomY-His6	5	5641.13		85.5754
														PomXN
														Supernatant PomXN-His6	6	14539	14733.3	98.6815
														Pellet PomXN-His6	7	194.263		1.31853
														Supernatant PomY-His6+PomXN-His6	8	11669.9	11843.5	98.5346
														Pellet PomY-His6+PomXN-His6	9	173.556		1.46541
														PomY			Summe (100%)	%
														Supernatant PomX-His6 + PomY-His6	4	3653.23	7028.81	51.9751
														Pellet PomX-His6 + PomY-His6	5	3375.58		48.0249
														Supernatant PomY-His6+PomXN-His6	8	4088.48	5386.69	75.8996
														Pellet PomY-His6+PomXN-His6	9	1298.21		24.1004
														Supernatant PomY-His6	10	4728.18	6673.52	70.8499
														Pellet PomY-His6	11	1945.34		29.1501
