# Supplementary material for: PomX, a ParA/MinD ATPase activating protein, is a triple regulator of cell division in Myxococcus xanthus
Source: eLife. 2021 Mar 18;10:e66160. doi: 10.7554/eLife.66160 (PMC7993993; doi:10.7554/eLife.66160)
Supplement: Figure 2—figure supplement 1—source data 4. [file elife-66160-fig2-figsupp1-data4.xlsx]

## Sheet: Figure 2_Source data 13
Source data for Figure 2-figure supplement 1D
														Lane
														1	Marker
														2	Supernatant	PomX-His6
														3	Pellet	PomX-His6
														4	Supernatant	PomXC-His6
														5	Pellet	PomXC-His6
														6	Supernatant	PomXN-His6
														7	Pellet	PomXN-His6
														8	Supernatant	PomX-His6+PomXC-His6
														9	Pellet	PomX-His6+PomXC-His6
														10	Supernatant	PomX-His6+PomXN-His6
														11	Pellet	PomX-His6+PomXN-His6
														12	Supernatant	PomXC-His6+PomXN-His6
														13	Pellet	PomXC-His6+PomXN-His6
													Quantifications	Lane
													PomX
													Supernatant PomX-His6	2	185556	3363690	5.51644
													Pellet PomX-His6	3	3178134		94.4836
													PomX-His6+PomXC-His6	8	338506	3294518	10.2748
													PomX-His6+PomXC-His6	9	2956012		89.7252
													PomX-His6+PomXN-His6	10	180728	4517054	4.00101
													PomX-His6+PomXN-His6	11	4336326		95.999
													PomXC
													Supernatant PomXC-His6	4	180263	1979518	9.10641
													Pellet PomXC-His6	5	1799255		90.8936
													PomX-His6+PomXC-His6	8	134607	1638448	8.21552
													PomX-His6+PomXC-His6	9	1503841		91.7845
													PomXC-His6+PomXN-His6	12	196385	1403397	13.9935
													PomXC-His6+PomXN-His6	13	1207012		86.0065
													PomXN
													PomXN-His6	6	17489167	17741966	98.5751
													PomXN-His6	7	252799		1.42486
													PomX-His6+PomXN-His6	10	15530560	16179380	95.9898
													PomX-His6+PomXN-His6	11	648820		4.01017
													PomXC-His6+PomXN-His6	12	17685581	19130221	92.4484
													PomXC-His6+PomXN-His6	13	1444640		7.55161
