# Supplementary material for: PomX, a ParA/MinD ATPase activating protein, is a triple regulator of cell division in Myxococcus xanthus
Source: eLife. 2021 Mar 18;10:e66160. doi: 10.7554/eLife.66160 (PMC7993993; doi:10.7554/eLife.66160)
Supplement: Figure 2—figure supplement 1—source data 5. [file elife-66160-fig2-figsupp1-data5.xlsx]

## Sheet: Figure 2_Source data 14
Source data for Figure 2_figure supplement 1E
Standards
Protein	kDa	Volumen [µL]
Blue Dextran	2000000	500
Ferritin	440000	500
Conalbumin	75000	500
Carbonic Anhydrase	29000	500
Rnase A	13700	500
Ovalbumin	43000	500
Rnase A	13700	500
Aprotinin	6500	500
