# Supplementary material for: PomX, a ParA/MinD ATPase activating protein, is a triple regulator of cell division in Myxococcus xanthus
Source: eLife. 2021 Mar 18;10:e66160. doi: 10.7554/eLife.66160 (PMC7993993; doi:10.7554/eLife.66160)
Supplement: Figure 2—figure supplement 1—source data 6. [file elife-66160-fig2-figsupp1-data6.xlsx]

## Sheet: Figure 2_Source data 15
Source data for Figure 2_figure supplement 1F
													Lane
													1	Marker
													2	Load	PomXN-Strep
													3	Flowthrough
													4	Last wash
													5	Elution
													6	Marker
													7	Load	PomXN-Strep+PomXC-His6
													8	Flowthrough
													9	Last wash
													10	Elution
													11	Marker
													12	Load	PomXC-His6
													13	Flowthrough
													14	Last wash
													15	Elution
