# Supplementary material for: PomX, a ParA/MinD ATPase activating protein, is a triple regulator of cell division in Myxococcus xanthus
Source: eLife. 2021 Mar 18;10:e66160. doi: 10.7554/eLife.66160 (PMC7993993; doi:10.7554/eLife.66160)
Supplement: Figure 2—source data 1. [file elife-66160-fig2-data1.xlsx]

## Sheet: Figure 2-source data 1
Source data for Figure 2A
			pKT25								pKNT25
			PomX	PomXK13R15A	PomX ∆2-21	PomX C	PomX N	PomXNK13R15A	PomX N∆2-21	-	PomX	PomXK13R15	PomX ∆2-21	PomX C	PomX N	PomXNK13R15A	PomX N∆2-21	-
			pDS106	pSH37	pDS186	pDS190	pDS194	pDS255	pDS259		pDS114	pSH36	pDS187	pDS191	pDS195	pDS256	pDS260
pUT18	PomX	pDS110	1	2	3	4	5	6	7	8	1	2	3	4	5	6	7	8
	PomXK13R15A	pSH38	9	10	11	12	13	14	15	16	9	10	11	12	13	14	15	16
	PomX ∆2-21	pDS184	17	18	19	20	21	22	23	24	17	18	19	20	21	22	23	24
	PomX C	pDS188	25	26	27	28	29	30	31	32	25	26	27	28	29	30	31	32
	PomX N	pDS192	33	34	35	36	37	38	39	40	33	34	35	36	37	38	39	40
	PomY	pDS122	41	42	43	44	45	46	47	48	41	42	43	44	45	46	47	48			1	2
	PomZ	pDS109	49	50	51	52	53	54	55	56	49	50	51	52	53	54	55	56			3	4
	PomZD90A	pDS117	57	58	59	60	61	62	63	64	57	58	59	60	61	62	63	64
	PomXNK13R15A	pDS253	65	66	67	68	69	70	71	72	65	66	67	68	69	70	71	72
	PomXN∆2-21	pDS257	73	74	75	76	77	78	79	80	73	74	75	76	77	78	79	80
	-		81	82	83	84	85	86	87	88	81	82	83	84	85	86	87	88
pUT18C	PomX	pDS103	1	2	3	4	5	6	7	8	1	2	3	4	5	6	7	8
	PomXK13R15A	pSH39	9	10	11	12	13	14	15	16	9	10	11	12	13	14	15	16
	PomX ∆2-21	pDS185	17	18	19	20	21	22	23	24	17	18	19	20	21	22	23	24
	PomX C	pDS189	25	26	27	28	29	30	31	32	25	26	27	28	29	30	31	32
	PomX N	pDS193	33	34	35	36	37	38	39	40	33	34	35	36	37	38	39	40
	PomY	pDS120	41	42	43	44	45	46	47	48	41	42	43	44	45	46	47	48
	PomZ	pDS100	49	50	51	52	53	54	55	56	49	50	51	52	53	54	55	56
	PomZD90A	pDS115	57	58	59	60	61	62	63	64	57	58	59	60	61	62	63	64
	PomXNK13R15A	pDS254	65	66	67	68	69	70	71	72	65	66	67	68	69	70	71	72
	PomX N∆2-21	pDS258	73	74	75	76	77	78	79	80	73	74	75	76	77	78	79	80
	-		81	82	83	84	85	86	87	88	81	82	83	84	85	86	87	88
																		positive
	Indicated here are the lines and row of the spotted colonies in the pictures
