# Supplementary material for: PomX, a ParA/MinD ATPase activating protein, is a triple regulator of cell division in Myxococcus xanthus
Source: eLife. 2021 Mar 18;10:e66160. doi: 10.7554/eLife.66160 (PMC7993993; doi:10.7554/eLife.66160)
Supplement: Figure 2—source data 3. [file elife-66160-fig2-data3.xlsx]

## Sheet: Figure 2-source data 3
Source data for Figure 2C
	Sample No.	Sample description
	1	PageRuler™ Prestained Protein Ladder, #SM0671									Sample No.	Sample description
	2	Load		6	PomX C-Strep						1	PageRuler™ Prestained Protein Ladder, #SM0671
	3	Flowthrough									2	Load		6	PomX C-Strep
	4	Wash									3	Flowthrough
	5	Elution 1									4	Wash
	6	PageRuler™ Prestained Protein Ladder, #SM0671									5	Elution 1
	7	Load		8	PomX-His6 + PomX C-Strep						6	PageRuler™ Prestained Protein Ladder, #SM0671
	8	Flowthrough									7	Load		7	PomY-His6 + PomX C-Strep
	9	Wash									8	Flowthrough
	10	Elution 1									9	Wash
	11	PageRuler™ Prestained Protein Ladder, #SM0671									10	Elution 1
	12	Load		2	PomX-His6						11	PageRuler™ Prestained Protein Ladder, #SM0671
	13	Flowthrough									12	Load		1	PomY-His6
	14	Wash									13	Flowthrough
	15	Elution 1									14	Wash
											15	Elution 1		15
