# Supplementary material for: PomX, a ParA/MinD ATPase activating protein, is a triple regulator of cell division in Myxococcus xanthus
Source: eLife. 2021 Mar 18;10:e66160. doi: 10.7554/eLife.66160 (PMC7993993; doi:10.7554/eLife.66160)
Supplement: Figure 2—source data 4. [file elife-66160-fig2-data4.xlsx]

## Sheet: Figure 2-source data 4
Source data for Figure 2D
	Sample No.	Sample description									Sample No.	Sample description
	1	PageRuler™ Prestained Protein Ladder, #SM0671									1	PageRuler™ Prestained Protein Ladder, #SM0671
	2	Load				PomX N-Strep					2	Load				PomX N-Strep
	3	Flowthrough									3	Flowthrough
	4	Wash									4	Wash
	5	Elution 1									5	Elution 1
	6	PageRuler™ Prestained Protein Ladder, #SM0671									6	PageRuler™ Prestained Protein Ladder, #SM0671
	7	Load				PomX-His6 + PomX N-Strep					7	Load				PomY-His6 + PomX N-Strep
	8	Flowthrough									8	Flowthrough
	9	Wash									9	Wash
	10	Elution 1									10	Elution 1
	11	PageRuler™ Prestained Protein Ladder, #SM0671									11	PageRuler™ Prestained Protein Ladder, #SM0671
	12	Load				PomX-His6					12	Load				PomY-His6
	13	Flowthrough									13	Flowthrough
	14	Wash									14	Wash
	15	Elution 1									15	Elution 1
