# Supplementary material for: PomX, a ParA/MinD ATPase activating protein, is a triple regulator of cell division in Myxococcus xanthus
Source: eLife. 2021 Mar 18;10:e66160. doi: 10.7554/eLife.66160 (PMC7993993; doi:10.7554/eLife.66160)
Supplement: Figure 2—source data 5. [file elife-66160-fig2-data5.xlsx]

## Sheet: Figure 2-source data 5
Source data for Figure 2E
																				PomZ protein range				PomZ protein range with DNA
µM His6-PomZ	Δ340nm 1	Δ340nm 2	Δ340nm 3	Δ340nm 1 - ØKontrolle	Δ340nm 2 - ØKontrolle	Δ340nm 3 - ØKontrolle	d [cm]	Activity [µM/min]	Activity [µM/min]	Activity [µM/min]	Activity [µM/min]	Activity [µM/min]	Activity [µM/min]							MEAN activity	STDEV			MEAN activity	STDEV
0	0.000921	0.000971	0.000983	7.13333e-05	0.000121333	0.000133333	0.248189	0.045694	0.0777225	0.0854093	2.74164	4.66335	5.12456						0	2.72883	2.24898			3.28612	5.05993
0.5	0.000929	0.000881	0.000994	0.000154667	0.000106667	0.000219667	0.248189	0.0990748	0.0683275	0.140712	5.94449	4.09965	8.44271						0.5	7.58435	2.81717			12.2989	4.43338
1	0.00105	0.0011	0.00119	0.000291333	0.000341333	0.000431333	0.248189	0.186619	0.218648	0.276299	11.1972	13.1189	16.5779						1	12.5039	3.01261			16.2769	4.50618
2	0.00129	0.00119	0.00116	0.000551667	0.000451667	0.000421667	0.248189	0.353381	0.289324	0.270107	21.2029	17.3594	16.2064						2	16.879	3.33164			25.0719	5.49325
4	0.00152	0.00147	0.00164	0.000738667	0.000688667	0.000858667	0.248189	0.473168	0.441139	0.550036	28.3901	26.4683	33.0022						4	29.7481	2.65895			50.6819	2.77522
8	0.00225	0.00211	0.00207	0.00145533	0.00131533	0.00127533	0.248189	0.932243	0.842563	0.81694	55.9346	50.5538	49.0164						8	51.1111	3.74458			87.9631	16.1779
10	0.00245	0.00257	0.00245	0.00165133	0.00177133	0.00165133	0.248189	1.05779	1.13466	1.05779	63.4677	68.0798	63.4677						10	62.667	3.06852			102.722	18.2958
12	0.00263	0.00266	0.00282	0.00181433	0.00184433	0.00200433	0.248189	1.16221	1.18142	1.28392	69.7324	70.8855	77.0349						12	70.4947	3.85264			111.517	10.8971
15	0.00301	0.00302	0.00316	0.00215633	0.00216633	0.00230633	0.248189	1.38128	1.38769	1.47737	82.8769	83.2613	88.6421						15	83.2164	3.22549			150.713	4.23472
20	0.00393	0.00393	0.00413	0.00300533	0.00300533	0.00320533	0.248189	1.92513	1.92513	2.05324	115.508	115.508	123.194						20	116.91	3.99149			199.108	6.70934
								Kontrolle 1	Kontrolle 2	Kontrolle 3	ØKontrolle	µM His6-PomZ
								0.000842	0.00086	0.000847	0.000849667	0
								0.00079	0.000758	0.000775	0.000774333	0.5
								0.000753	0.000751	0.000772	0.000758667	1
								0.000727	0.000726	0.000762	0.000738333	2
								0.000768	0.000804	0.000772	0.000781333	4
								0.000781	0.000791	0.000812	0.000794667	8
								0.000788	0.000831	0.000777	0.000798667	10
								0.000803	0.000806	0.000838	0.000815667	12
								0.000852	0.000842	0.000867	0.000853667	15
								0.000918	0.000932	0.000924	0.000924667	20
µM His6-PomZ	Δ340nm 1	Δ340nm 2	Δ340nm 3	Δ340nm 1 - ØKontrolle	Δ340nm 2 - ØKontrolle	Δ340nm 3 - ØKontrolle	d [cm]	Activity [µM/min]	Activity [µM/min]	Activity [µM/min]	Activity [µM/min]	Activity [µM/min]	Activity [µM/min]
0	0.000907	0.000954	0.00102	-2e-05	2.7e-05	9.3e-05	0.248189	-0.0128114	0.0172954	0.059573	-0.768684	1.03772	3.57438
0.5	0.00105	0.000955	0.00111	0.000246	0.000151	0.000306	0.248189	0.15758	0.0967261	0.196014	9.45481	5.80356	11.7609
1	0.000976	0.00104	0.00115	0.000216667	0.000280667	0.000390667	0.248189	0.13879	0.179787	0.250249	8.32741	10.7872	15.015
2	0.0013	0.00117	0.0011	0.000513333	0.000383333	0.000313333	0.248189	0.328826	0.245552	0.200712	19.7296	14.7331	12.0427
4	0.00147	0.0015	0.00159	0.000736	0.000766	0.000856	0.248189	0.471459	0.490677	0.548328	28.2876	29.4406	32.8997
8	0.00219	0.00201	0.00197	0.00144433	0.00126433	0.00122433	0.248189	0.925196	0.809894	0.784271	55.5118	48.5936	47.0563
10	0.00233	0.00233	0.00232	0.001573	0.001573	0.001563	0.248189	1.00762	1.00762	1.00121	60.457	60.457	60.0726
12	0.0025	0.00251	0.00264	0.00173067	0.00174067	0.00187067	0.248189	1.10861	1.11502	1.19829	66.5168	66.9011	71.8976
15	0.00289	0.00286	0.00299	0.00209733	0.00206733	0.00219733	0.248189	1.34349	1.32427	1.40755	80.6093	79.4563	84.4527
20	0.00378	0.0038	0.00397	0.00294167	0.00296167	0.00313167	0.248189	1.88434	1.89715	2.00605	113.061	113.829	120.363
								Kontrolle 1	Kontrolle 2	Kontrolle 3	ØKontrolle	µM His6-PomZ
								0.000919	0.000956	0.000906	0.000927	0
								0.000827	0.000798	0.000787	0.000804	0.5
								0.000753	0.000752	0.000773	0.000759333	1
								0.000776	0.000781	0.000803	0.000786667	2
								0.000718	0.000754	0.00073	0.000734	4
								0.000734	0.00073	0.000773	0.000745667	8
								0.000745	0.00075	0.000776	0.000757	10
								0.00075	0.000758	0.0008	0.000769333	12
								0.000774	0.000789	0.000815	0.000792667	15
								0.000839	0.000845	0.000831	0.000838333	20
µM His6-PomZ	Δ340nm 1	Δ340nm 2	Δ340nm 3	Δ340nm 1 - ØKontrolle	Δ340nm 2 - ØKontrolle	Δ340nm 3 - ØKontrolle	d [cm]	Activity [µM/min]	Activity [µM/min]	Activity [µM/min]	Activity [µM/min]	Activity [µM/min]	Activity [µM/min]
0	0.000992	0.00104	0.00115	0.000104	0.000152	0.000262	0.248189	0.0666193	0.0973666	0.167829	3.99716	5.842	10.0698
0.5	0.001	0.000946	0.0011	0.00023	0.000176	0.00033	0.248189	0.147331	0.11274	0.211388	8.83986	6.76442	12.6833
1	0.000994	0.00106	0.00115	0.000274667	0.000340667	0.000430667	0.248189	0.175943	0.218221	0.275872	10.5566	13.0932	16.5523
2	0.00144	0.00139	0.00129	0.000618	0.000568	0.000468	0.248189	0.395872	0.363844	0.299787	23.7523	21.8306	17.9872
4	0.00196	0.00205	0.00206	0.00123933	0.00132933	0.00133933	0.248189	0.79388	0.851531	0.857937	47.6328	51.0919	51.4762
8	0.00284	0.00228	0.00295	0.00216033	0.00160033	0.00227033	0.248189	1.38384	1.02513	1.45431	83.0307	61.5075	87.2584
10	0.003	0.0034	0.00301	0.00228967	0.00268967	0.00229967	0.248189	1.46669	1.72292	1.4731	88.0015	103.375	88.3858
12	0.00331	0.00334	0.0039	0.002554	0.002584	0.003144	0.248189	1.63602	1.65523	2.01395	98.1609	99.314	120.837
15	0.00461	0.00458	0.00474	0.00384033	0.00381033	0.00397033	0.248189	2.46	2.44078	2.54328	147.6	146.447	152.597
20	0.00596	0.00592	0.00603	0.00512	0.00508	0.00519	0.248189	3.27972	3.2541	3.32456	196.783	195.246	199.473
								Kontrolle 1	Kontrolle 2	Kontrolle 3	ØKontrolle	µM His6-PomZ
								0.0009	0.000864	0.0009	0.000888	0
								0.000778	0.00078	0.000752	0.00077	0.5
								0.000712	0.000734	0.000712	0.000719333	1
								0.000814	0.000836	0.000816	0.000822	2
								0.000701	0.000714	0.000747	0.000720667	4
								0.000662	0.000653	0.000724	0.000679667	8
								0.000716	0.000724	0.000691	0.000710333	10
								0.000749	0.000765	0.000754	0.000756	12
								0.000758	0.000765	0.000786	0.000769667	15
								0.000844	0.000865	0.000811	0.00084	20
µM His6-PomZ	Δ340nm 1	Δ340nm 2	Δ340nm 3	Δ340nm 1 - ØKontrolle	Δ340nm 2 - ØKontrolle	Δ340nm 3 - ØKontrolle	d [cm]	Activity [µM/min]	Activity [µM/min]	Activity [µM/min]	Activity [µM/min]	Activity [µM/min]	Activity [µM/min]
0	0.000935	0.00103	0.00117	-0.000111667	-1.66667e-05	0.000123333	0.248189	-0.0715303	-0.0106762	0.0790036	-4.29182	-0.64057	4.74022
0.5	0.00124	0.00121	0.0014	0.000351333	0.000321333	0.000511333	0.248189	0.225054	0.205836	0.327545	13.5032	12.3502	19.6527
1	0.00135	0.00128	0.00149	0.000475	0.000405	0.000615	0.248189	0.304271	0.259431	0.39395	18.2562	15.5658	23.637
2	0.00173	0.00155	0.0015	0.00089	0.00071	0.00066	0.248189	0.570107	0.454805	0.422776	34.2064	27.2883	25.3666
4	0.00205	0.00217	0.00224	0.00123133	0.00135133	0.00142133	0.248189	0.788755	0.865623	0.910463	47.3253	51.9374	54.6278
8	0.00335	0.00309	0.00366	0.00255033	0.00229033	0.00286033	0.248189	1.63367	1.46712	1.83224	98.02	88.0271	109.935
10	0.00392	0.00411	0.00303	0.00315233	0.00334233	0.00226233	0.248189	2.01929	2.141	1.44918	121.157	128.46	86.951
12	0.00382	0.00403	0.00368	0.003019	0.003229	0.002879	0.248189	1.93388	2.0684	1.8442	116.033	124.104	110.652
15	0.00466	0.00474	0.00491	0.003859	0.003939	0.004109	0.248189	2.47196	2.5232	2.6321	148.318	151.392	157.926
20	0.00598	0.0062	0.00649	0.00498767	0.00520767	0.00549767	0.248189	3.19495	3.33587	3.52164	191.697	200.152	211.298
								Kontrolle 1	Kontrolle 2	Kontrolle 3	ØKontrolle	µM His6-PomZ
								0.00105	0.00105	0.00104	0.00104667	0
								0.000878	0.000867	0.000921	0.000888667	0.5
								0.000879	0.000888	0.000858	0.000875	1
								0.000851	0.000821	0.000848	0.00084	2
								0.000832	0.000813	0.000811	0.000818667	4
								0.000809	0.000799	0.000791	0.000799667	8
								0.000764	0.000782	0.000757	0.000767667	10
								0.000794	0.000803	0.000806	0.000801	12
								0.000812	0.000806	0.000785	0.000801	15
								0.000993	0.001	0.000984	0.000992333	20
