# Supplementary material for: PomX, a ParA/MinD ATPase activating protein, is a triple regulator of cell division in Myxococcus xanthus
Source: eLife. 2021 Mar 18;10:e66160. doi: 10.7554/eLife.66160 (PMC7993993; doi:10.7554/eLife.66160)
Supplement: Figure 2—source data 6. [file elife-66160-fig2-data6.xlsx]

## Sheet: Figure 2-source data 6
Source data for Figure 2F
Herring Sperm DNA [µg/mL]	µM His6-PomZ	Δ340nm 1	Δ340nm 2	Δ340nm 3	Δ340nm 1 - ØKontrolle	Δ340nm 2 - ØKontrolle	Δ340nm 3 - ØKontrolle	d [cm]	Activity [1/min]	Activity [1/min]	Activity [1/min]	Activity [1/h]	Activity [1/h]	Activity [1/h]					Herring Sperm DNA [µg/mL]	MEAN	STDEV
0	4	0.00173	0.00177	0.00165	0.000887	0.000927	0.000807	0.248189	0.142046	0.148452	0.129235	8.52278	8.90712	7.7541					0	7.80855	0.777932
0.625	4	0.00164	0.00176	0.0017	0.000801333	0.000921333	0.000861333	0.248189	0.128328	0.147545	0.137936	7.69965	8.85268	8.27616					0.625	8.53346	0.931543
2.5	4	0.00198	0.00184	0.00179	0.001168	0.001028	0.000978	0.248189	0.187046	0.164626	0.156619	11.2228	9.87759	9.39716					2.5	9.25944	1.46168
10	4	0.00232	0.00216	0.00229	0.001572	0.001412	0.001542	0.248189	0.251744	0.226121	0.24694	15.1046	13.5673	14.8164					10	13.9772	1.16111
20	4	0.00225	0.00214	0.00216	0.001521	0.001411	0.001431	0.248189	0.243577	0.225961	0.229164	14.6146	13.5577	13.7498					20	13.9217	1.65512
40	4	0.00213	0.00203	0.00209	0.001366	0.001266	0.001326	0.248189	0.218755	0.20274	0.212349	13.1253	12.1644	12.7409					40	14.5217	1.63613
60	4	0.00247	0.0022	0.00235	0.00172533	0.00145533	0.00160533	0.248189	0.276299	0.233061	0.257082	16.5779	13.9836	15.4249					60	15.5669	1.05567
80	4	0.00228	0.00226	0.00227	0.00152167	0.00150167	0.00151167	0.248189	0.243683	0.240481	0.242082	14.621	14.4288	14.5249					80	14.89	0.864783
100	4	0.00222	0.00233	0.00235	0.001487	0.001597	0.001617	0.248189	0.238132	0.255748	0.25895	14.2879	15.3449	15.537					100	14.5997	1.10747
150	4	0.00244	0.00237	0.00258	0.00168233	0.00161233	0.00182233	0.248189	0.269413	0.258203	0.291833	16.1648	15.4922	17.51					150	15.8018	1.26512
200	4	0.0024	0.00252	0.00232	0.00152367	0.00164367	0.00144367	0.248189	0.244004	0.263221	0.231192	14.6402	15.7933	13.8715					200	15.2071	1.85462
250	4	0.00259	0.0027	0.00252	0.001608	0.001718	0.001538	0.248189	0.257509	0.275125	0.246299	15.4505	16.5075	14.7779					250	15.0011	1.71512
									Kontrolle 1	Kontrolle 2	Kontrolle 3	ØKontrolle	Herring Sperm DNA [µg/mL]
									0.000833	0.000877	0.000819	0.000843	0
									0.000828	0.000859	0.000829	0.000838667	0.625
									0.000781	0.000803	0.000852	0.000812	2.5
									0.000734	0.000772	0.000738	0.000748	10
									0.000717	0.000753	0.000717	0.000729	20
									0.00075	0.000755	0.000787	0.000764	40
									0.000739	0.000767	0.000728	0.000744667	60
									0.000765	0.000781	0.000729	0.000758333	80
									0.000705	0.000767	0.000727	0.000733	100
									0.000791	0.000745	0.000737	0.000757667	150
									0.000934	0.000849	0.000846	0.000876333	200
									0.00101	0.000971	0.000965	0.000982	250
Herring Sperm DNA [µg/mL]	µM His6-PomZ	Δ340nm 1	Δ340nm 2	Δ340nm 3	Δ340nm 1 - ØKontrolle	Δ340nm 2 - ØKontrolle	Δ340nm 3 - ØKontrolle	d [cm]	Activity [1/min]	Activity [1/min]	Activity [1/min]	Activity [1/h]	Activity [1/h]	Activity [1/h]
0	4	0.00181	0.00188	0.00176	0.000811	0.000881	0.000761	0.248189	0.129876	0.141086	0.121868	7.79253	8.46513	7.31211
0.625	4	0.00161	0.00182	0.00167	0.000769667	0.000979667	0.000829667	0.248189	0.123256	0.156886	0.132865	7.39538	9.41317	7.97189
2.5	4	0.0019	0.00179	0.0017	0.001143	0.001033	0.000943	0.248189	0.183043	0.165427	0.151014	10.9826	9.92563	9.06086
10	4	0.00229	0.00217	0.00235	0.00154533	0.00142533	0.00160533	0.248189	0.247474	0.228256	0.257082	14.8484	13.6954	15.4249
20	4	0.00241	0.00234	0.00246	0.00161233	0.00154233	0.00166233	0.248189	0.258203	0.246993	0.26621	15.4922	14.8196	15.9726
40	4	0.0024	0.00241	0.00224	0.00157467	0.00158467	0.00141467	0.248189	0.252171	0.253772	0.226548	15.1303	15.2263	13.5929
60	4	0.00249	0.00222	0.00243	0.00174833	0.00147833	0.00168833	0.248189	0.279982	0.236744	0.270374	16.7989	14.2046	16.2224
80	4	0.00247	0.00228	0.00249	0.00168067	0.00149067	0.00170067	0.248189	0.269146	0.238719	0.272349	16.1488	14.3231	16.3409
100	4	0.00224	0.00225	0.00225	0.001408	0.001418	0.001418	0.248189	0.225481	0.227082	0.227082	13.5288	13.6249	13.6249
150	4	0.00241	0.00237	0.00253	0.00156467	0.00152467	0.00168467	0.248189	0.25057	0.244164	0.269787	15.0342	14.6498	16.1872
200	4	0.00257	0.00271	0.00251	0.00176433	0.00190433	0.00170433	0.248189	0.282545	0.304965	0.272936	16.9527	18.2979	16.3762
250	4	0.00261	0.00267	0.00257	0.001699	0.001759	0.001659	0.248189	0.272082	0.281691	0.265676	16.3249	16.9014	15.9406
									Kontrolle 1	Kontrolle 2	Kontrolle 3	ØKontrolle	Herring Sperm DNA [µg/mL]
									0.001	0.000987	0.00101	0.000999	0
									0.00084	0.000868	0.000813	0.000840333	0.625
									0.000742	0.000779	0.00075	0.000757	2.5
									0.000734	0.00077	0.00073	0.000744667	10
									0.000777	0.000839	0.000777	0.000797667	20
									0.000804	0.000864	0.000808	0.000825333	40
									0.000726	0.000736	0.000763	0.000741667	60
									0.000772	0.000819	0.000777	0.000789333	80
									0.00082	0.00081	0.000866	0.000832	100
									0.000886	0.000819	0.000831	0.000845333	150
									0.00083	0.000816	0.000771	0.000805667	200
									0.000918	0.000931	0.000884	0.000911	250
Herring Sperm DNA [µg/mL]	µM His6-PomZ	Δ340nm 1	Δ340nm 2	Δ340nm 3	Δ340nm 1 - ØKontrolle	Δ340nm 2 - ØKontrolle	Δ340nm 3 - ØKontrolle	d [cm]	Activity [1/min]	Activity [1/min]	Activity [1/min]	Activity [1/h]	Activity [1/h]	Activity [1/h]
0	4	0.0022	0.00231	0.00215	0.000726667	0.000836667	0.000676667	0.248189	0.11637	0.133986	0.108363	6.98221	8.03915	6.50178
0.625	4	0.00212	0.00234	0.00213	0.000866667	0.00108667	0.000876667	0.248189	0.13879	0.174021	0.140392	8.32741	10.4413	8.42349
2.5	4	0.0022	0.00213	0.00203	0.000873333	0.000803333	0.000703333	0.248189	0.139858	0.128648	0.112634	8.39147	7.71887	6.75801
10	4	0.00272	0.0027	0.00256	0.00139	0.00137	0.00123	0.248189	0.222598	0.219395	0.196975	13.3559	13.1637	11.8185
20	4	0.00273	0.00236	0.0026	0.00145333	0.00108333	0.00132333	0.248189	0.23274	0.173488	0.211922	13.9644	10.4093	12.7153
40	4	0.00295	0.00301	0.00298	0.00166	0.00172	0.00169	0.248189	0.265837	0.275445	0.270641	15.9502	16.5267	16.2384
60	4	0.00305	0.00287	0.00299	0.00170667	0.00152667	0.00164667	0.248189	0.27331	0.244484	0.263701	16.3986	14.6691	15.8221
80	4	0.00289	0.0028	0.00273	0.00159667	0.00150667	0.00143667	0.248189	0.255694	0.241281	0.230071	15.3416	14.4769	13.8043
100	4	0.0031	0.00284	0.00283	0.00175333	0.00149333	0.00148333	0.248189	0.280783	0.239146	0.237545	16.847	14.3488	14.2527
150	4	0.00289	0.00279	0.00318	0.00157333	0.00147333	0.00186333	0.248189	0.251957	0.235943	0.298399	15.1174	14.1566	17.9039
200	4	0.00285	0.00304	0.00276	0.00138667	0.00157667	0.00129667	0.248189	0.222064	0.252491	0.207651	13.3239	15.1495	12.4591
250	4	0.0029	0.00306	0.0028	0.00133667	0.00149667	0.00123667	0.248189	0.214057	0.23968	0.198043	12.8434	14.3808	11.8826
									Kontrolle 1	Kontrolle 2	Kontrolle 3	ØKontrolle	Herring Sperm DNA [µg/mL]
									0.00146	0.00149	0.00147	0.00147333	0
									0.00128	0.00126	0.00122	0.00125333	0.625
									0.00131	0.00132	0.00135	0.00132667	2.5
									0.00131	0.00132	0.00136	0.00133	10
									0.00125	0.00131	0.00127	0.00127667	20
									0.00128	0.00127	0.00132	0.00129	40
									0.00132	0.00134	0.00137	0.00134333	60
									0.00128	0.00131	0.00129	0.00129333	80
									0.00133	0.00133	0.00138	0.00134667	100
									0.00136	0.00129	0.0013	0.00131667	150
									0.00146	0.00148	0.00145	0.00146333	200
									0.00158	0.00154	0.00157	0.00156333	250
