# Supplementary material for: PomX, a ParA/MinD ATPase activating protein, is a triple regulator of cell division in Myxococcus xanthus
Source: eLife. 2021 Mar 18;10:e66160. doi: 10.7554/eLife.66160 (PMC7993993; doi:10.7554/eLife.66160)
Supplement: Figure 2—source data 7. [file elife-66160-fig2-data7.xlsx]

## Sheet: Figure 2-source data 7
Source data for Figure 2G																			minus DNA			plus DNA
µM PomX-His6	Herring Sperm DNA [µg/mL]	µM His6-PomZ	Δ340nm 1	Δ340nm 2	Δ340nm 3	Δ340nm 1 - ØKontrolle	Δ340nm 2 - ØKontrolle	Δ340nm 3 - ØKontrolle	d [cm]	Activity [1/min]	Activity [1/min]	Activity [1/min]	Activity [1/h]	Activity [1/h]	Activity [1/h]			Protein conc.	MEAN	STDEV		MEAN	STDEV
0	0	4	0.00157	0.00149	0.00166	0.000707	0.000627	0.000797	0.248189	0.113221	0.100409	0.127634	6.79324	6.02456	7.65801			0	6.2984	0.835154		8.0872	0.791751
0.5	0	4	0.00149	0.00154	0.00164	0.000626333	0.000676333	0.000776333	0.248189	0.100303	0.10831	0.124324	6.01815	6.49858	7.45944			0.5	6.26798	0.736661		9.52688	1.44372
1	0	4	0.00174	0.00176	0.0017	0.00069	0.00071	0.00065	0.248189	0.110498	0.113701	0.104093	6.6299	6.82207	6.24556			1	5.97812	0.762834		16.2224	2.21824
2	0	4	0.0019	0.00172	0.00171	0.000746667	0.000566667	0.000556667	0.248189	0.119573	0.0907474	0.089146	7.17438	5.44484	5.34876			2	6.36887	0.914528		20.6584	2.04822
4	0	4	0.00244	0.0023	0.00252	0.00072	0.00058	0.0008	0.248189	0.115303	0.0928826	0.128114	6.91816	5.57296	7.68684			4	5.14057	1.90732		18.8488	1.25538
6	0	4	0.0027	0.00258	0.00263	0.00064	0.00052	0.00057	0.248189	0.102491	0.0832741	0.0912812	6.14947	4.99645	5.47687			6	4.54805	1.26161		26.3595	1.25034
8	0	4	0.00305	0.00321	0.00305	0.000645	0.000805	0.000645	0.248189	0.103292	0.128915	0.103292	6.19751	7.73488	6.19751			8	5.65303	1.64715		34.2465	2.4162
10	0	4	0.0035	0.00353	0.00346	0.000475	0.000505	0.000435	0.248189	0.0760677	0.080872	0.069662	4.56406	4.85232	4.17972			10	4.74022	0.638565		35.3034	3.69516
12	0	4	0.00368	0.00371	0.00373	0.000363333	0.000393333	0.000413333	0.248189	0.0581851	0.0629894	0.0661922	3.49111	3.77936	3.97153			12	2.57829	1.51975		39.9555	5.86276
15	0	4	0.00439	0.00353	0.00436	0.00053	-0.00033	0.0005	0.248189	0.0848755	-0.052847	0.0800712	5.09253	-3.17082	4.80427			15	4.21975	1.05625		44.2794	6.71868
										Kontrolle 1	Kontrolle 2	Kontrolle 3	ØKontrolle	µM PomX-His6
										0.000863	0.000853	0.000873	0.000863	0
										0.000862	0.000853	0.000876	0.000863667	0.5
										0.00105	0.00104	0.00106	0.00105	1
										0.00114	0.00113	0.00119	0.00115333	2
										0.00169	0.00163	0.00184	0.00172	4
										0.00206	0.00204	0.00208	0.00206	6
										0.00233	0.00228	0.00248	0.002405	8
										0.003	0.00286	0.00305	0.003025	10
										0.00318	0.00328	0.00349	0.00331667	12
										0.00375	0.00389	0.00394	0.00386	15
µM PomX-His6	Herring Sperm DNA [µg/mL]	µM His6-PomZ	Δ340nm 1	Δ340nm 2	Δ340nm 3	Δ340nm 1 - ØKontrolle	Δ340nm 2 - ØKontrolle	Δ340nm 3 - ØKontrolle	d [cm]	Activity [1/min]	Activity [1/min]	Activity [1/min]	Activity [1/h]	Activity [1/h]	Activity [1/h]
0	0	4	0.00132	0.00129	0.00139	0.000587333	0.000557333	0.000657333	0.248189	0.094057	0.0892527	0.105267	5.64342	5.35516	6.31602
0.5	0	4	0.00129	0.00132	0.00141	0.000561667	0.000591667	0.000681667	0.248189	0.0899467	0.094751	0.109164	5.3968	5.68506	6.54983
1	0	4	0.0014	0.00146	0.00134	0.000561	0.000621	0.000501	0.248189	0.0898399	0.0994485	0.0802314	5.3904	5.96691	4.81388
2	0	4	0.00168	0.00174	0.00158	0.000715667	0.000775667	0.000615667	0.248189	0.114609	0.124217	0.0985944	6.87652	7.45303	5.91566
4	0	4	0.00208	0.00209	0.00197	0.000403333	0.000413333	0.000293333	0.248189	0.0645908	0.0661922	0.0469751	3.87545	3.97153	2.81851
6	0	4	0.0023	0.00213	0.00219	0.000463333	0.000293333	0.000353333	0.248189	0.0741993	0.0469751	0.0565837	4.45196	2.81851	3.39502
8	0	4	0.00254	0.00277	0.00244	0.000435	0.000665	0.000335	0.248189	0.069662	0.106495	0.0536477	4.17972	6.38968	3.21886
10	0	4	0.00284	0.00296	0.00278	0.000495	0.000615	0.000435	0.248189	0.0792705	0.0984876	0.069662	4.75623	5.90926	4.17972
12	0	4	0.00309	0.00329	0.00304	9.66667e-05	0.000296667	4.66667e-05	0.248189	0.0154804	0.0475089	0.00747332	0.928826	2.85054	0.448399
15	0	4	0.00359	0.00296	0.00343	0.000443333	-0.000186667	0.000283333	0.248189	0.0709965	-0.0298933	0.0453737	4.25979	-1.7936	2.72242
										Kontrolle 1	Kontrolle 2	Kontrolle 3	ØKontrolle	µM PomX-His6
										0.000722	0.000743	0.000733	0.000732667	0
										0.000714	0.000709	0.000762	0.000728333	0.5
										0.000844	0.000825	0.000848	0.000839	1
										0.00105	0.000927	0.000916	0.000964333	2
										0.00167	0.00163	0.00173	0.00167667	4
										0.00182	0.00187	0.00182	0.00183667	6
										0.00211	0.00205	0.0021	0.002105	8
										0.00234	0.00255	0.00235	0.002345	10
										0.0029	0.00312	0.00296	0.00299333	12
										0.00325	0.00314	0.00305	0.00314667	15
µM PomX-His6	Herring Sperm DNA [µg/mL]	µM His6-PomZ	Δ340nm 1	Δ340nm 2	Δ340nm 3	Δ340nm 1 - ØKontrolle	Δ340nm 2 - ØKontrolle	Δ340nm 3 - ØKontrolle	d [cm]	Activity [1/min]	Activity [1/min]	Activity [1/min]	Activity [1/h]	Activity [1/h]	Activity [1/h]
0	60	4	0.00182	0.00177	0.00186	0.000905667	0.000855667	0.000945667	0.248189	0.145036	0.137029	0.151441	8.70214	8.22171	9.08648
0.5	60	4	0.00214	0.00194	0.00167	0.001201	0.001001	0.000731	0.248189	0.192331	0.160303	0.117064	11.5399	9.61816	7.02385
1	60	4	0.00272	0.00318	0.00258	0.00168667	0.00214667	0.00154667	0.248189	0.270107	0.343773	0.247687	16.2064	20.6264	14.8612
2	60	4	0.00356	0.00335	0.00376	0.00228	0.00207	0.00248	0.248189	0.365125	0.331495	0.397153	21.9075	19.8897	23.8292
4	60	4	0.0041	0.00382	0.00374	0.00216333	0.00188333	0.00180333	0.248189	0.346442	0.301602	0.28879	20.7865	18.0961	17.3274
6	60	4	0.00523	0.00519	0.00526	0.00278667	0.00274667	0.00281667	0.248189	0.446264	0.439858	0.451068	26.7758	26.3915	27.0641
8	60	4	0.00694	0.00704	0.00668	0.0038	0.0039	0.00354	0.248189	0.608541	0.624556	0.566904	36.5125	37.4733	34.0143
10	60	4	0.0073	0.00755	0.00754	0.003845	0.004095	0.004085	0.248189	0.615748	0.655783	0.654182	36.9449	39.347	39.2509
12	60	4	0.00841	0.00859	0.00878	0.00451333	0.00469333	0.00488333	0.248189	0.722776	0.751602	0.782029	43.3666	45.0961	46.9217
15	60	4	0.00998	0.00782	0.00972	0.00527667	0.00311667	0.00501667	0.248189	0.845018	0.499111	0.803381	50.7011	29.9466	48.2029
										Kontrolle 1	Kontrolle 2	Kontrolle 3	ØKontrolle	µM PomX-His6
										0.000905	0.00092	0.000918	0.000914333	0
										0.000924	0.000923	0.00097	0.000939	0.5
										0.00102	0.00102	0.00106	0.00103333	1
										0.00127	0.00127	0.0013	0.00128	2
										0.00195	0.00192	0.00194	0.00193667	4
										0.00236	0.00246	0.00251	0.00244333	6
										0.00313	0.00315	0.00315	0.00314	8
										0.00348	0.00323	0.00343	0.003455	10
										0.00401	0.00378	0.0039	0.00389667	12
										0.00447	0.00483	0.00481	0.00470333	15
µM PomX-His6	Herring Sperm DNA [µg/mL]	µM His6-PomZ	Δ340nm 1	Δ340nm 2	Δ340nm 3	Δ340nm 1 - ØKontrolle	Δ340nm 2 - ØKontrolle	Δ340nm 3 - ØKontrolle	d [cm]	Activity [1/min]	Activity [1/min]	Activity [1/min]	Activity [1/h]	Activity [1/h]	Activity [1/h]
0	60	4	0.00176	0.00173	0.00185	0.000761	0.000731	0.000851	0.248189	0.121868	0.117064	0.136281	7.31211	7.02385	8.17687
0.5	60	4	0.00202	0.00199	0.00201	0.00101867	0.000988667	0.00100867	0.248189	0.163132	0.158328	0.16153	9.78791	9.49965	9.69182
1	60	4	0.00283	0.00276	0.00283	0.00160667	0.00153667	0.00160667	0.248189	0.257296	0.246086	0.257296	15.4377	14.7651	15.4377
2	60	4	0.00348	0.00319	0.00342	0.00214	0.00185	0.00208	0.248189	0.342705	0.296264	0.333096	20.5623	17.7758	19.9858
4	60	4	0.00372	0.00388	0.00378	0.0019	0.00206	0.00196	0.248189	0.304271	0.329894	0.313879	18.2562	19.7936	18.8328
6	60	4	0.00542	0.00509	0.00509	0.00292333	0.00259333	0.00259333	0.248189	0.46815	0.415303	0.415303	28.089	24.9182	24.9182
8	60	4	0.00643	0.00646	0.00618	0.003455	0.003485	0.003205	0.248189	0.553292	0.558097	0.513257	33.1975	33.4858	30.7954
10	60	4	0.00668	0.00689	0.00668	0.00327	0.00348	0.00327	0.248189	0.523666	0.557296	0.523666	31.42	33.4377	31.42
12	60	4	0.00742	0.00771	0.00743	0.00352	0.00381	0.00353	0.248189	0.563702	0.610143	0.565303	33.8221	36.6086	33.9182
15	60	4	0.00892	0.0071	0.00818	0.00444	0.00262	0.0037	0.248189	0.711033	0.419573	0.592527	42.662	25.1744	35.5516
										Kontrolle 1	Kontrolle 2	Kontrolle 3	ØKontrolle	µM PomX-His6
										0.000994	0.00102	0.000983	0.000999	0
										0.000991	0.000993	0.00102	0.00100133	0.5
										0.00122	0.00119	0.00126	0.00122333	1
										0.00134	0.00132	0.00136	0.00134	2
										0.00182	0.00173	0.00191	0.00182	4
										0.00254	0.00246	0.00249	0.00249667	6
										0.00297	0.00293	0.00298	0.002975	8
										0.00346	0.00357	0.00336	0.00341	10
										0.00386	0.004	0.00384	0.0039	12
										0.00448	0.00456	0.0044	0.00448	15
