# Supplementary material for: PomX, a ParA/MinD ATPase activating protein, is a triple regulator of cell division in Myxococcus xanthus
Source: eLife. 2021 Mar 18;10:e66160. doi: 10.7554/eLife.66160 (PMC7993993; doi:10.7554/eLife.66160)
Supplement: Figure 2—source data 8. [file elife-66160-fig2-data8.xlsx]

## Sheet: Figure 2-source data 8
Source data for Figure 2H
µM PomXl.c.-His6	Herring Sperm DNA [µg/mL]	µM His6-PomZ	Δ340nm 1	Δ340nm 2	Δ340nm 3	Δ340nm 1 - ØKontrolle	Δ340nm 2 - ØKontrolle	Δ340nm 3 - ØKontrolle	d [cm]	Activity [1/min]	Activity [1/min]	Activity [1/min]	Activity [1/h]	Activity [1/h]	Activity [1/h]					Protein conc.	MEAN	STDEV		MEAN	STDEV
0	0	4	0.00134	0.00138	0.00126	0.000586667	0.000626667	0.000506667	0.248189	0.0939503	0.100356	0.0811389	5.63702	6.02136	4.86833					0	5.70428	0.848756		8.25801	0.977227
0.5	0	4	0.00129	0.00122	0.00133	0.000588333	0.000518333	0.000628333	0.248189	0.0942172	0.0830072	0.100623	5.65303	4.98043	6.03737					0.5	5.6479	0.620331		9.61816	0.790869
1	0	4	0.00126	0.00136	0.00122	0.000579333	0.000679333	0.000539333	0.248189	0.0927759	0.10879	0.0863702	5.56655	6.52741	5.18221					1	5.88684	0.591271		11.5185	1.00365
2	0	4	0.00142	0.0012	0.00124	0.000769	0.000549	0.000589	0.248189	0.12315	0.0879182	0.0943239	7.38897	5.27509	5.65944					2	5.81157	0.851184		15.363	1.29169
4	0	4	0.00122	0.00137	0.00122	0.000555	0.000705	0.000555	0.248189	0.0888791	0.1129	0.0888791	5.33274	6.77403	5.33274					4	5.97972	1.16995		23.2772	1.62779
6	0	4	0.00146	0.00135	0.00131	0.0004	0.00029	0.00025	0.248189	0.064057	0.0464413	0.0400356	3.84342	2.78648	2.40214					6	4.19573	1.93726		28.9474	1.55838
8	0	4	0.00148	0.00145	0.00133	0.00037	0.00034	0.00022	0.248189	0.0592527	0.0544484	0.0352313	3.55516	3.26691	2.11388					8	4.35588	1.81463		35.1353	1.66477
10	0	4	0.00145	0.00131	0.00133	0.000792	0.000652	0.000672	0.248189	0.126833	0.104413	0.107616	7.60997	6.26477	6.45694					10	6.33396	1.21424		38.5196	1.93171
12	0	4	0.0014	0.0016	0.00151	0.000213333	0.000413333	0.000323333	0.248189	0.0341637	0.0661922	0.0517794	2.04982	3.97153	3.10676					12	4.54805	2.4431		42.4057	3.25346
15	0	4	0.00152	0.00145	0.00123	0.000522	0.000452	0.000232	0.248189	0.0835944	0.0723844	0.0371531	5.01566	4.34306	2.22918					15	4.73894	1.84437		42.4805	4.24686
40	0	4	0.00204	0.00198	0.000958	0.00056	0.0005	-0.000522	0.248189	0.0896798	0.0800712	-0.0835944	5.38079	4.80427	-5.01566
										Kontrolle 1	Kontrolle 2	Kontrolle 3	ØKontrolle	µM PomX-His6
										0.000765	0.000712	0.000783	0.000753333	0
										0.000706	0.000695	0.000704	0.000701667	0.5
										0.000671	0.000688	0.000683	0.000680667	1
										0.000644	0.00065	0.000659	0.000651	2
										0.000661	0.000672	0.000662	0.000665	4
										0.00104	0.00109	0.00105	0.00106	6
										0.00111	0.00113	0.00111	0.00111	8
										0.000644	0.000683	0.000672	0.000658	10
										0.00117	0.00119	0.0012	0.00118667	12
										0.00101	0.000991	0.000993	0.000998	15
										0.0015	0.00147	0.00147	0.00148	40
µM PomXl.c.-His6	Herring Sperm DNA [µg/mL]	µM His6-PomZ	Δ340nm 1	Δ340nm 2	Δ340nm 3	Δ340nm 1 - ØKontrolle	Δ340nm 2 - ØKontrolle	Δ340nm 3 - ØKontrolle	d [cm]	Activity [1/min]	Activity [1/min]	Activity [1/min]	Activity [1/h]	Activity [1/h]	Activity [1/h]
0	0	4	0.00142	0.00128	0.00152	0.000627333	0.000487333	0.000727333	0.248189	0.100463	0.0780428	0.116477	6.02776	4.68257	6.98862
0.5	0	4	0.000827	0.00132	0.00146	3.9e-05	0.000532	0.000672	0.248189	0.00624556	0.0851958	0.107616	0.374733	5.11175	6.45694
1	0	4	0.00138	0.00146	0.00134	0.000612667	0.000692667	0.000572667	0.248189	0.098114	0.110925	0.0917083	5.88684	6.65552	5.5025
2	0	4	0.00156	0.00146	0.00147	0.000637333	0.000537333	0.000547333	0.248189	0.102064	0.0860499	0.0876513	6.12385	5.16299	5.25908
4	0	4	0.00166	0.00195	0.000834	0.000503333	0.000793333	-0.000322667	0.248189	0.080605	0.127046	-0.0516726	4.8363	7.62278	-3.10036
6	0	4	0.00189	0.00216	0.000883	0.000486667	0.000756667	-0.000520333	0.248189	0.077936	0.121174	-0.0833275	4.67616	7.27047	-4.99965
8	0	4	0.00212	0.00233	0.00205	0.00055	0.00076	0.00048	0.248189	0.0880784	0.121708	0.0768684	5.2847	7.3025	4.6121
10	0	4	0.00251	0.00224	0.000877	0.000725	0.000455	-0.000908	0.248189	0.116103	0.0728648	-0.145409	6.9662	4.37189	-8.72456
12	0	4	0.00247	0.0028	0.000972	0.000543333	0.000873333	-0.000954667	0.248189	0.0870107	0.139858	-0.152883	5.22064	8.39147	-9.17296
15	0	4	0.00287	0.00315	0.00107	0.00049	0.00077	-0.00131	0.248189	0.0784698	0.12331	-0.209787	4.70819	7.39858	-12.5872
										Kontrolle 1	Kontrolle 2	Kontrolle 3	ØKontrolle	µM PomX-His6
these values were not considered for the calculation of the mean for a technical reason										0.000769	0.000809	0.0008	0.000792667	0
										0.000786	0.000774	0.000804	0.000788	0.5
										0.000769	0.000769	0.000764	0.000767333	1
										0.000895	0.000914	0.000959	0.000922667	2
										0.00114	0.00117	0.00116	0.00115667	4
										0.00135	0.00143	0.00143	0.00140333	6
										0.00157	0.00164	0.00157	0.00157	8
										0.0018	0.0017	0.00177	0.001785	10
										0.00195	0.00196	0.00187	0.00192667	12
										0.00236	0.00245	0.00233	0.00238	15
µM PomXl.c.-His6	Herring Sperm DNA [µg/mL]	µM His6-PomZ	Δ340nm 1	Δ340nm 2	Δ340nm 3	Δ340nm 1 - ØKontrolle	Δ340nm 2 - ØKontrolle	Δ340nm 3 - ØKontrolle	d [cm]	Activity [1/min]	Activity [1/min]	Activity [1/min]	Activity [1/h]	Activity [1/h]	Activity [1/h]
0	60	4	0.0015	0.00146	0.00156	0.000824667	0.000784667	0.000884667	0.248189	0.132064	0.125658	0.141673	7.92385	7.53951	8.50036
0.5	60	4	0.00159	0.00164	0.00168	0.000933	0.000983	0.001023	0.248189	0.149413	0.15742	0.163826	8.96478	9.4452	9.82955
1	60	4	0.00181	0.00189	0.0018	0.00111233	0.00119233	0.00110233	0.248189	0.178132	0.190943	0.17653	10.6879	11.4566	10.5918
2	60	4	0.00239	0.00223	0.00235	0.00167767	0.00151767	0.00163767	0.248189	0.268666	0.243043	0.26226	16.1199	14.5826	15.7356
4	60	4	0.00333	0.0033	0.00315	0.00248367	0.00245367	0.00230367	0.248189	0.397741	0.392936	0.368915	23.8644	23.5762	22.1349
6	60	4	0.00399	0.00395	0.00404	0.00302567	0.00298567	0.00307567	0.248189	0.484538	0.478132	0.492545	29.0723	28.6879	29.5527
8	60	4	0.00499	0.00482	0.00478	0.003935	0.003765	0.003725	0.248189	0.630161	0.602936	0.596531	37.8096	36.1762	35.7918
10	60	4	0.00541	0.00549	0.00524	0.004185	0.004265	0.004015	0.248189	0.670196	0.683008	0.642972	40.2118	40.9805	38.5783
12	60	4	0.006	0.00578	0.00622	0.00463667	0.00441667	0.00485667	0.248189	0.742527	0.707296	0.777759	44.5516	42.4378	46.6655
15	60	4	0.00639	0.00565	0.00626	0.00481667	0.00407667	0.00468667	0.248189	0.771353	0.652848	0.750534	46.2812	39.1709	45.0321
										Kontrolle 1	Kontrolle 2	Kontrolle 3	ØKontrolle	µM PomX-His6
										0.000665	0.00069	0.000671	0.000675333	0
										0.000649	0.000655	0.000667	0.000657	0.5
										0.000683	0.000721	0.000689	0.000697667	1
										0.000712	0.000716	0.000709	0.000712333	2
										0.000838	0.000844	0.000857	0.000846333	4
										0.000978	0.000952	0.000963	0.000964333	6
										0.001	0.00111	0.00111	0.001055	8
										0.00119	0.0012	0.00126	0.001225	10
										0.00134	0.00136	0.00139	0.00136333	12
										0.00155	0.00156	0.00161	0.00157333	15
µM PomXl.c.-His6	Herring Sperm DNA [µg/mL]	µM His6-PomZ	Δ340nm 1	Δ340nm 2	Δ340nm 3	Δ340nm 1 - ØKontrolle	Δ340nm 2 - ØKontrolle	Δ340nm 3 - ØKontrolle	d [cm]	Activity [1/min]	Activity [1/min]	Activity [1/min]	Activity [1/h]	Activity [1/h]	Activity [1/h]
0	60	4	0.00156	0.00145	0.00151	0.000823667	0.000713667	0.000773667	0.248189	0.131904	0.114288	0.123897	7.91424	6.8573	7.43381
0.5	60	4	0.00163	0.00173	0.00185	0.000956667	0.00105667	0.00117667	0.248189	0.153203	0.169217	0.188434	9.19218	10.153	11.3061
1	60	4	0.00191	0.00205	0.00182	0.00122333	0.00136333	0.00113333	0.248189	0.195908	0.218328	0.181495	11.7545	13.0997	10.8897
2	60	4	0.00258	0.00234	0.00246	0.001828	0.001588	0.001708	0.248189	0.29274	0.254306	0.273523	17.5644	15.2584	16.4114
4	60	4	0.00343	0.00344	0.00342	0.00260767	0.00261767	0.00259767	0.248189	0.417598	0.4192	0.415997	25.0559	25.152	24.9598
6	60	4	0.00423	0.00409	0.00413	0.003259	0.003119	0.003159	0.248189	0.521904	0.499484	0.50589	31.3143	29.9691	30.3534
8	60	4	0.0049	0.00468	0.00479	0.003795	0.003575	0.003685	0.248189	0.607741	0.572509	0.590125	36.4644	34.3506	35.4075
10	60	4	0.00531	0.00541	0.00506	0.0041	0.0042	0.00385	0.248189	0.656584	0.672598	0.616549	39.395	40.3559	36.9929
12	60	4	0.00584	0.00553	0.0061	0.00452	0.00421	0.00478	0.248189	0.723844	0.6742	0.765481	43.4306	40.452	45.9289
15	60	4	0.00649	0.00624	0.00559	0.00496667	0.00471667	0.00406667	0.248189	0.795374	0.755339	0.651246	47.7225	45.3203	39.0748
										Kontrolle 1	Kontrolle 2	Kontrolle 3	ØKontrolle	µM PomX-His6
										0.000722	0.000746	0.000741	0.000736333	0
										0.000674	0.000674	0.000672	0.000673333	0.5
										0.000666	0.000683	0.000711	0.000686667	1
										0.000746	0.000754	0.000756	0.000752	2
										0.000813	0.000804	0.00085	0.000822333	4
										0.000936	0.000977	0.001	0.000971	6
										0.00112	0.00111	0.00109	0.001105	8
										0.00122	0.00122	0.0012	0.00121	10
										0.00131	0.00132	0.00133	0.00132	12
										0.00154	0.00153	0.0015	0.00152333	15
PomZ+DNA+PomX N-terminus 18.06.2019
µM PomXl.c.-His6	Herring Sperm DNA [µg/mL]	µM His6-PomZ	Δ340nm 1	Δ340nm 2	Δ340nm 3	Δ340nm 1 - ØKontrolle	Δ340nm 2 - ØKontrolle	Δ340nm 3 - ØKontrolle	d [cm]	Activity [1/min]	Activity [1/min]	Activity [1/min]	Activity [1/h]	Activity [1/h]	Activity [1/h]
0	60	4	0.00173	0.0017	0.00179	0.000966667	0.000936667	0.00102667	0.248189	0.154804	0.15	0.164413	9.28826	9.00001	9.86478
0.5	60	4	0.00174	0.00177	0.00186	0.00091	0.00094	0.00103	0.248189	0.14573	0.150534	0.164947	8.74378	9.03204	9.89681
1	60	4	0.00194	0.00214	0.00188	0.001174	0.001374	0.001114	0.248189	0.188007	0.220036	0.178399	11.2804	13.2021	10.7039
2	60	4	0.00242	0.00222	0.00227	0.00159433	0.00139433	0.00144433	0.248189	0.25532	0.223292	0.231299	15.3192	13.3975	13.8779
4	60	4	0.00319	0.00329	0.00312	0.00223633	0.00233633	0.00216633	0.248189	0.358132	0.374146	0.346922	21.4879	22.4488	20.8153
6	60	4	0.00398	0.00387	0.00383	0.00291667	0.00280667	0.00276667	0.248189	0.467082	0.449467	0.443061	28.0249	26.968	26.5837
8	60	4	0.00455	0.00468	0.00447	0.00346	0.00359	0.00338	0.248189	0.554093	0.574911	0.541282	33.2456	34.4947	32.4769
10	60	4	0.00503	0.00517	0.00485	0.003835	0.003975	0.003655	0.248189	0.614146	0.636566	0.585321	36.8488	38.194	35.1192
12	60	4	0.00536	0.00542	0.00592	0.00389333	0.00395333	0.00445333	0.248189	0.623488	0.633097	0.713168	37.4093	37.9858	42.7901
15	60	4	0.00621	0.00529	0.00607	0.00450667	0.00358667	0.00436667	0.248189	0.721709	0.574378	0.699289	43.3025	34.4627	41.9573
										Kontrolle 1	Kontrolle 2	Kontrolle 3	ØKontrolle	µM PomX-His6
										0.000752	0.000765	0.000773	0.000763333	0
										0.00082	0.000813	0.000857	0.00083	0.5
										0.000765	0.00074	0.000793	0.000766	1
										0.00084	0.000797	0.00084	0.000825667	2
										0.000955	0.000914	0.000992	0.000953667	4
										0.00103	0.00109	0.00107	0.00106333	6
										0.00108	0.00104	0.0011	0.00109	8
										0.00118	0.00128	0.00121	0.001195	10
										0.00145	0.00152	0.00143	0.00146667	12
										0.00179	0.00167	0.00165	0.00170333	15
