# Supplementary material for: PomX, a ParA/MinD ATPase activating protein, is a triple regulator of cell division in Myxococcus xanthus
Source: eLife. 2021 Mar 18;10:e66160. doi: 10.7554/eLife.66160 (PMC7993993; doi:10.7554/eLife.66160)
Supplement: Figure 2—source data 9. [file elife-66160-fig2-data9.xlsx]

## Sheet: Figure 2-source data 9
Source data for Figure 2I
PomZ+PomX C
µM PomXCC.-His6	Herring Sperm DNA [µg/mL]	µM His6-PomZ	Δ340nm 1	Δ340nm 2	Δ340nm 3	Δ340nm 1 - ØKontrolle	Δ340nm 2 - ØKontrolle	Δ340nm 3 - ØKontrolle	d [cm]	Activity [1/min]	Activity [1/min]	Activity [1/min]	Activity [1/h]	Activity [1/h]	Activity [1/h]			protein conc.	minus DNA			plus DNA
0	0	4	0.00146	0.00142	0.00151	0.000604333	0.000564333	0.000654333	0.248189	0.0967794	0.0903737	0.104787	5.80677	5.42242	6.28719				MEAN	STDEV		MEAN	STDEV
0.5	0	4	0.00169	0.00184	0.00175	0.000743333	0.000893333	0.000803333	0.248189	0.119039	0.143061	0.128648	7.14235	8.58364	7.71887			0	5.75712	0.402341		7.5251	0.572896
1	0	4	0.00169	0.00175	0.00163	0.0007	0.00076	0.00064	0.248189	0.1121	0.121708	0.102491	6.72598	7.3025	6.14947			0.5	6.11264	2.00906		7.25445	1.59485
2	0	4	0.00197	0.00187	0.00194	0.000766667	0.000666667	0.000736667	0.248189	0.122776	0.106762	0.117972	7.36655	6.4057	7.0783			1	5.82919	1.22949		7.76691	1.97673
4	0	4	0.00209	0.0021	0.00204	0.00056	0.00057	0.00051	0.248189	0.0896798	0.0912812	0.0816727	5.38079	5.47687	4.90036			2	5.98933	1.22849		8.50357	1.48783
6	0	4	0.00248	0.00238	0.00239	0.00071	0.00061	0.00062	0.248189	0.113701	0.0976869	0.0992883	6.82207	5.86121	5.9573			4	5.70107	0.682139		5.5089	1.12875
8	0	4	0.00278	0.00269	0.00271	0.00048	0.00039	0.00041	0.248189	0.0768684	0.0624556	0.0656584	4.6121	3.74733	3.9395			6	6.45374	0.811719		5.02847	1.66942
10	0	4	0.00303	0.00307	0.00296	0.00063	0.00067	0.00056	0.248189	0.10089	0.107295	0.0896798	6.05339	6.43773	5.38079			8	5.02047	1.19577		4.39591	1.80599
12	0	4	0.00301	0.0031	0.00292	3e-05	0.00012	-6e-05	0.248189	0.00480427	0.0192171	-0.00960855	0.288256	1.15303	-0.576513			10	5.57296	1.41478		4.45997	2.28664
15	0	4	0.00351	0.00307	0.00348	0.000293333	-0.000146667	0.000263333	0.248189	0.0469751	-0.0234876	0.0421709	2.81851	-1.40925	2.53025			12	3.25089	3.45235		4.29182	2.65238
										Kontrolle 1	Kontrolle 2	Kontrolle 3	ØKontrolle	µM PomX-His6				15	4.08363	4.10609		1.54377	4.05253
										0.000842	0.000846	0.000879	0.000855667	0
										0.000941	0.000934	0.000965	0.000946667	0.5
										0.00101	0.000981	0.000979	0.00099	1
										0.0012	0.00119	0.00122	0.00120333	2
										0.00149	0.00154	0.00156	0.00153	4
										0.00182	0.00174	0.00175	0.00177	6
										0.0023	0.00218	0.0023	0.0023	8
										0.00242	0.00223	0.00238	0.0024	10
										0.00307	0.00285	0.00302	0.00298	12
										0.00329	0.00327	0.00309	0.00321667	15
PomZ+PomX C
µM PomXCC.-His6	Herring Sperm DNA [µg/mL]	µM His6-PomZ	Δ340nm 1	Δ340nm 2	Δ340nm 3	Δ340nm 1 - ØKontrolle	Δ340nm 2 - ØKontrolle	Δ340nm 3 - ØKontrolle	d [cm]	Activity [1/min]	Activity [1/min]	Activity [1/min]	Activity [1/h]	Activity [1/h]	Activity [1/h]
0	0	4	0.00139	0.00139	0.00131	0.000617333	0.000617333	0.000537333	0.248189	0.0988613	0.0988613	0.0860499	5.93168	5.93168	5.16299
0.5	0	4	0.00134	0.00153	0.0014	0.000375667	0.000565667	0.000435667	0.248189	0.0601602	0.0905873	0.0697687	3.60961	5.43524	4.18612
1	0	4	0.00147	0.00163	0.00143	0.000473333	0.000633333	0.000433333	0.248189	0.0758008	0.101424	0.0693951	4.54805	6.08541	4.1637
2	0	4	0.0018	0.00162	0.00173	0.000606667	0.000426667	0.000536667	0.248189	0.0971531	0.0683275	0.0859431	5.82919	4.09965	5.15659
4	0	4	0.00226	0.00221	0.00212	0.000703333	0.000653333	0.000563333	0.248189	0.112634	0.104626	0.0902136	6.75801	6.27759	5.41282
6	0	4	0.00284	0.00262	0.00268	0.000823333	0.000603333	0.000663333	0.248189	0.131851	0.0966193	0.106228	7.91104	5.79716	6.37367
8	0	4	0.00324	0.0031	0.00306	0.000725	0.000585	0.000545	0.248189	0.116103	0.0936833	0.0872777	6.9662	5.621	5.23666
10	0	4	0.00366	0.00386	0.00343	0.00055	0.00075	0.00032	0.248189	0.0880784	0.120107	0.0512456	5.2847	7.20641	3.07474
12	0	4	0.0042	0.00433	0.00399	0.000673333	0.000803333	0.000463333	0.248189	0.107829	0.128648	0.0741993	6.46976	7.71887	4.45196
15	0	4	0.00471	0.00447	0.00522	0.000623333	0.000383333	0.00113333	0.248189	0.0998221	0.061388	0.181495	5.98933	3.68328	10.8897
										Kontrolle 1	Kontrolle 2	Kontrolle 3	ØKontrolle	µM PomX-His6
										0.000766	0.000783	0.000769	0.000772667	0
										0.000952	0.000987	0.000954	0.000964333	0.5
										0.000978	0.000982	0.00103	0.000996667	1
										0.00121	0.00115	0.00122	0.00119333	2
										0.00164	0.00152	0.00151	0.00155667	4
										0.00201	0.00205	0.00199	0.00201667	6
										0.00254	0.00246	0.00249	0.002515	8
										0.00315	0.00312	0.00307	0.00311	10
										0.00364	0.00351	0.00343	0.00352667	12
										0.00406	0.00425	0.00395	0.00408667	15
PomZ+PomX C-terminus + DNA
µM PomXCC.-His6	Herring Sperm DNA [µg/mL]	µM His6-PomZ	Δ340nm 1	Δ340nm 2	Δ340nm 3	Δ340nm 1 - ØKontrolle	Δ340nm 2 - ØKontrolle	Δ340nm 3 - ØKontrolle	d [cm]	Activity [1/min]	Activity [1/min]	Activity [1/min]	Activity [1/h]	Activity [1/h]	Activity [1/h]
0	60	4	0.00162	0.00156	0.00171	0.000791	0.000731	0.000881	0.248189	0.126673	0.117064	0.141086	7.60036	7.02385	8.46513
0.5	60	4	0.00185	0.00206	0.00196	0.00077	0.00098	0.00088	0.248189	0.12331	0.15694	0.140925	7.39858	9.41638	8.45552
1	60	4	0.00213	0.00226	0.002	0.000683333	0.000813333	0.000553333	0.248189	0.109431	0.130249	0.0886122	6.56584	7.81495	5.31673
2	60	4	0.00277	0.00263	0.00283	0.000836667	0.000696667	0.000896667	0.248189	0.133986	0.111566	0.143594	8.03915	6.69396	8.61567
4	60	4	0.00374	0.00356	0.00352	0.000753333	0.000573333	0.000533333	0.248189	0.120641	0.091815	0.0854093	7.23844	5.5089	5.12456
6	60	4	0.00499	0.00461	0.00483	0.000666667	0.000286667	0.000506667	0.248189	0.106762	0.0459075	0.0811389	6.4057	2.75445	4.86833
8	60	4	0.00634	0.00594	0.00591	0.00081	0.00041	0.00038	0.248189	0.129715	0.0656584	0.0608541	7.78292	3.9395	3.65125
10	60	4	0.00714	0.00723	0.00687	0.00038	0.00047	0.00011	0.248189	0.0608541	0.075267	0.0176157	3.65125	4.51602	1.05694
12	60	4	0.00808	0.00818	0.00866	0.000246667	0.000346667	0.000826667	0.248189	0.0395018	0.0555161	0.132384	2.37011	3.33096	7.94307
15	60	4	0.0101	0.00781	0.00949	0.000536667	-0.00175333	-7.33333e-05	0.248189	0.0859431	-0.280783	-0.0117438	5.15659	-16.847	-0.704627
										Kontrolle 1	Kontrolle 2	Kontrolle 3	ØKontrolle	µM PomX-His6
this values were not considered for the calculation of the mean for a technical reason										0.000833	0.000831	0.000823	0.000829	0
										0.00112	0.00108	0.00104	0.00108	0.5
										0.00151	0.00138	0.00145	0.00144667	1
										0.00194	0.00193	0.00193	0.00193333	2
										0.00309	0.00298	0.00289	0.00298667	4
										0.00438	0.00424	0.00435	0.00432333	6
										0.00565	0.00512	0.00541	0.00553	8
										0.00687	0.00662	0.00665	0.00676	10
										0.00812	0.00767	0.00771	0.00783333	12
										0.00933	0.01	0.00936	0.00956333	15
PomZ+PomX C-terminus + DNA
µM PomXCC.-His6	Herring Sperm DNA [µg/mL]	µM His6-PomZ	Δ340nm 1	Δ340nm 2	Δ340nm 3	Δ340nm 1 - ØKontrolle	Δ340nm 2 - ØKontrolle	Δ340nm 3 - ØKontrolle	d [cm]	Activity [1/min]	Activity [1/min]	Activity [1/min]	Activity [1/h]	Activity [1/h]	Activity [1/h]
0	60	4	0.00177	0.00168	0.00175	0.000802	0.000712	0.000782	0.248189	0.128434	0.114021	0.125231	7.70606	6.84129	7.51389
0.5	60	4	0.00197	0.00218	0.00199	0.000556667	0.000766667	0.000576667	0.248189	0.089146	0.122776	0.0923488	5.34876	7.36655	5.54093
1	60	4	0.00221	0.00257	0.00222	0.00081	0.00117	0.00082	0.248189	0.129715	0.187367	0.131317	7.78292	11.242	7.87901
2	60	4	0.00311	0.00275	0.00291	0.00114667	0.000786667	0.000946667	0.248189	0.18363	0.125979	0.151602	11.0178	7.55872	9.09609
4	60	4	0.00382	0.00379	0.0036	0.00061	0.00058	0.00039	0.248189	0.0976869	0.0928826	0.0624556	5.86121	5.57296	3.74733
6	60	4	0.00515	0.0048	0.00509	0.000696667	0.000346667	0.000636667	0.248189	0.111566	0.0555161	0.101957	6.69396	3.33096	6.11744
8	60	4	0.00613	0.00592	0.00594	0.000515	0.000305	0.000325	0.248189	0.0824734	0.0488435	0.0520463	4.9484	2.93061	3.12278
10	60	4	0.00728	0.00748	0.00706	0.000615	0.000815	0.000395	0.248189	0.0984876	0.130516	0.0632563	5.90926	7.83097	3.79538
12	60	4	0.00843	0.00885	0.00826	0.000336667	0.000756667	0.000166667	0.248189	0.0539146	0.121174	0.0266904	3.23488	7.27047	1.60142
15	60	4	0.0103	0.00816	0.00996	0.00094	-0.0012	0.0006	0.248189	0.150534	-0.192171	0.0960855	9.03204	-11.5303	5.76513
										Kontrolle 1	Kontrolle 2	Kontrolle 3	ØKontrolle	µM PomX-His6
										0.000971	0.000963	0.00097	0.000968	0
										0.00142	0.0014	0.00142	0.00141333	0.5
										0.00136	0.00137	0.00147	0.0014	1
										0.00195	0.00196	0.00198	0.00196333	2
										0.00321	0.00313	0.00329	0.00321	4
										0.00458	0.00429	0.00449	0.00445333	6
										0.00566	0.00534	0.00557	0.005615	8
										0.00678	0.00671	0.00655	0.006665	10
										0.00844	0.00782	0.00802	0.00809333	12
										0.00906	0.00946	0.00956	0.00936	15
