# Supplementary material for: PomX, a ParA/MinD ATPase activating protein, is a triple regulator of cell division in Myxococcus xanthus
Source: eLife. 2021 Mar 18;10:e66160. doi: 10.7554/eLife.66160 (PMC7993993; doi:10.7554/eLife.66160)
Supplement: Figure 3—source data 1. [file elife-66160-fig3-data1.xlsx]

## Sheet: Figure 3-source data 1
Source data for Figure 3 B
			Lane															Lane
			1	Marker														1	Marker
			2	DK1622														2	DK1622
			3	SA4223														3	SA4223
			4	SA9718														4	SA9714
			5	SA9715														5	SA9731
			6	SA9700														6	SA9719
			7	SA9701														7	SA9716
			8	SA9702														8	SA9717
			9	SA9732														9	SA6100
																																											α
	Upper layer															lower layer
