# Supplementary material for: PomX, a ParA/MinD ATPase activating protein, is a triple regulator of cell division in Myxococcus xanthus
Source: eLife. 2021 Mar 18;10:e66160. doi: 10.7554/eLife.66160 (PMC7993993; doi:10.7554/eLife.66160)
Supplement: Figure 3—source data 2. [file elife-66160-fig3-data2.xlsx]

## Sheet: Figure 3-source data 2
Source data for Figure 3D
	Mean w/o minicells																	SA6100								DK1622								SA4223								SA9731
	Mean	7.95853	13.0769	7.35547	12.9101	7.40222	7.06433	7.65423	7.7407	7.82698	9.42802	8.83836	7.4885	7.83512	9.83824			Image Plane	Region Label	Distance	Constrictions	in %	normalized			Image Plane	Region Label	Distance	Constriction	in %	normalized			Image Plane	Region Label	Distance	constriction	in %	normalized			Image Plane	Region Label	Distance	constriction	in %	normalized
	STDEV	1.80501	6.0889	1.60968	5.41198	1.7469	1.59846	1.85432	1.97619	1.81577	3.13892	2.53799	1.7653	1.80803	5.39152			12	Polyline17	9.86324	5.1	51.7071	48.2929			13	Polyline5	10.9727	5.48	49.9423	49.9423			3	Polyline3	20.2505	12.08	59.6528	40.3472			2	Polyline17	12.6368	6.34	50.171	49.829
	N=	789	602	1186	620	1787	1579	739	1393	1103	1420	1417	1610	1682	501			6	Polyline7	17.6615	8.39	47.5044	47.5044			14	Polyline20	12.383	6.2	50.0687	49.9313			15	Polyline11	12.2875	7.46	60.712	39.288			2	Polyline18	14.2752	7.08	49.5966	49.5966
	Strain	DK1622	SA4223	SA9718	SA9715	SA9700	SA9701	SA9702	SA9732	SA9714	SA9731	SA9719	SA9716	SA9717	SA6100			15	Polyline8	13.6972	7.31	53.3686	46.6314			8	Polyline23	11.3171	5.68	50.1894	49.8106			19	Polyline17	22.4226	14.22	63.4182	36.5818			11	Polyline22	28.4923	14.13	49.5923	49.5923
	genotype	WT	ΔpomX	pomXK2A	pomXK3A	pomXE6A	pomXQ7A	pomXN8A	pomXS10A	pomXR11A	pomXK13A	pomXR15A	pomXR17A	pomXT22A	pomXK13R15A			15	Polyline23	11.8105	6.36	53.8502	46.1498			12	Polyline27	10.475	5.21	49.7376	49.7376			17	Polyline43	12.3827	4.16	33.5953	33.5953			14	Polyline5	11.677	5.92	50.6981	49.3019
		4.59908	1.28864	4.25908	1.93722	3.81954	3.59783	3.53232	3.56814	3.64963	0.740049	3.79359	3.19488	4.24663	1.84594			15	Polyline24	11.869	5.41	45.5809	45.5809			12	Polyline10	13.2642	6.58	49.6074	49.6074			16	Polyline22	24.67	7.94	32.1848	32.1848			5	Polyline23	10.8722	5.36	49.3001	49.3001
		4.68184	1.29792	4.29669	1.99044	4.00071	3.63893	3.85119	3.63515	3.71126	1.42652	4.41418	3.80118	4.39583	2.27572			18	Polyline7	9.26986	5.05	54.4776	45.5224			5	Polyline7	11.3498	5.72	50.3976	49.6024			17	Polyline33	22.8599	6.39	27.9528	27.9528			9	Polyline26	11.1462	5.48	49.1649	49.1649
		4.73396	1.40685	4.34316	2.49885	4.11525	3.75502	3.97982	3.84114	3.71392	2.05963	4.62106	4.2381	4.45724	2.43941			15	Polyline3	13.7602	6.21	45.1302	45.1302			4	Polyline1	10.4589	5.18	49.5273	49.5273			15	Polyline17	12.8083	3.14	24.5153	24.5153			4	Polyline7	19.991	10.36	51.8233	48.1767
		4.75602	1.49221	4.39563	2.77211	4.12866	3.77921	4.09706	3.85442	3.96921	2.16173	4.69401	4.24248	4.45861	2.68282			17	Polyline4	12.2881	6.77	55.0937	44.9063			6	Polyline15	10.5926	5.37	50.6958	49.3042			9	Polyline5	19.5006	16.3	83.5871	16.4129			10	Polyline27	9.33767	4.92	52.6898	47.3102
		4.80931	1.57111	4.44045	2.91085	4.14317	3.8438	4.25009	3.93705	4.20725	2.35733	4.76912	4.3203	4.50818	2.79492			18	Polyline24	9.62994	4.28	44.4447	44.4447			12	Polyline35	12.5218	6.35	50.7114	49.2886			1	Polyline1	6.60804		0	0			15	Polyline19	11.9958	6.38	53.1855	46.8145
		4.84363	1.59207	4.44836	3.87294	4.18115	3.90748	4.27518	3.96612	4.39603	3.11058	4.8665	4.394	4.55697	2.83271			15	Polyline7	12.0178	5.23	43.5189	43.5189			13	Polyline30	10.9569	5.56	50.7441	49.2559			1	Polyline2	13.1507		0	0			3	Polyline25	27.2103	12.6	46.306	46.306
		4.96431	1.60591	4.52465	4.84522	4.26819	3.94635	4.296	4.06522	4.48326	3.26207	4.94869	4.40944	4.61206	2.85906			15	Polyline19	11.2375	6.35	56.5072	43.4928			6	Polyline4	13.5891	6.91	50.8497	49.1503			1	Line3	3.55604		0	0			8	Polyline5	12.3962	6.72	54.21	45.79
		4.97983	1.63887	4.63508	5.16419	4.30856	4.04029	4.34309	4.06552	4.51856	3.46667	4.96146	4.43099	4.6416	3.07693			13	Polyline12	11.6564	4.97	42.6376	42.6376			4	Polyline6	11.9707	6.09	50.8744	49.1256			1	Line4	1.34001		0	0			2	Polyline24	11.9625	6.67	55.7577	44.2423
		4.99897	1.76506	4.65256	5.25027	4.31057	4.13531	4.35906	4.07654	4.54421	3.62575	4.98916	4.45726	4.69395	3.1072			13	Polyline8	18.3944	10.57	57.4631	42.5369			2	Polyline17	9.95719	5.07	50.918	49.082			1	Polyline5	20.3262		0	0			8	Polyline18	12.4212	7.03	56.5969	43.4031
		5.01413	1.83218	4.70571	5.38869	4.47401	4.18603	4.38906	4.08873	4.57445	3.71263	5.11612	4.48896	4.71223	3.16177			19	Polyline5	9.4837	5.58	58.8378	41.1622			7	Polyline16	12.6607	6.45	50.945	49.055			1	Polyline6	10.5822		0	0			15	Polyline7	12.3738	7.04	56.8943	43.1057
		5.05988	1.91989	4.7289	5.44868	4.48089	4.207	4.49609	4.26231	4.70908	4.1815	5.17538	4.52177	4.78914	3.16512			4	Polyline1	9.55878	5.65	59.108	40.892			4	Polyline12	10.9663	5.37	48.9681	48.9681			1	Polyline7	13.1574		0	0			7	Polyline12	10.1338	4.3	42.4321	42.4321
		5.09026	1.97347	4.75421	5.46106	4.58664	4.30913	4.55832	4.45147	4.74836	4.34713	5.19965	4.54695	4.80285	3.37897			1	Polyline11	14.6198	5.94	40.6297	40.6297			4	Polyline24	11.5221	5.88	51.0323	48.9677			2	Polyline1	12.9715		0	0			2	Polyline11	12.7996	7.44	58.1266	41.8734
		5.10847	1.98434	4.79352	5.56684	4.59187	4.31749	4.67398	4.47268	4.79943	4.49426	5.2184	4.55944	4.87876	3.42749			13	Polyline3	12.1742	7.25	59.5522	40.4478			2	Polyline8	9.59443	4.91	51.1755	48.8245			2	Polyline2	11.5912		0	0			15	Polyline30	11.849	4.89	41.2695	41.2695
		5.10871	2.04608	4.82012	5.57491	4.59368	4.33079	4.68992	4.51916	4.81409	4.68113	5.24492	4.56272	4.89407	3.5119			17	Polyline12	10.2575	6.18	60.2485	39.7515			8	Polyline2	9.46775	4.61	48.6916	48.6916			2	Polyline3	13.3076		0	0			15	Polyline3	10.873	4.37	40.1913	40.1913
		5.13329	2.05554	4.84359	5.61344	4.61774	4.3823	4.73876	4.51951	4.87823	4.68373	5.25562	4.56337	4.90224	3.57445			12	Polyline5	18.4717	7.21	39.0327	39.0327			10	Polyline4	11.4312	5.88	51.438	48.562			2	Polyline4	8.99781		0	0			6	Polyline9	11.6529	6.97	59.8136	40.1864
		5.13944	2.07913	4.84692	5.61763	4.64879	4.40153	4.76264	4.54042	4.9538	4.8791	5.28169	4.62314	4.91182	3.63803			8	Polyline2	9.44	3.58	37.9237	37.9237			13	Polyline22	10.393	5.35	51.477	48.523			2	Polyline5	13.094		0	0			14	Polyline7	11.6211	7.01	60.3214	39.6786
		5.16101	2.11421	4.85886	5.61941	4.65471	4.42047	4.77003	4.56225	4.96178	4.89175	5.32477	4.63023	4.92945	3.68555			11	Polyline3	15.2201	9.46	62.1546	37.8454			1	Polyline23	18.702	9.07	48.4974	48.4974			2	Polyline6	6.9872		0	0			13	Polyline9	11.6141	7.23	62.252	37.748
		5.18046	2.38425	4.8817	5.63481	4.65862	4.42733	4.78291	4.60153	4.99267	4.98081	5.36607	4.65604	4.93941	3.68842			20	Polyline5	9.27839	3.25	35.0276	35.0276			14	Polyline25	12.3087	6.34	51.5084	48.4916			2	Polyline7	28.7799		0	0			10	Polyline15	12.9494	8.23	63.5551	36.4449
		5.1839	2.85694	4.92991	5.63657	4.66804	4.44756	4.78822	4.60921	4.99939	4.98162	5.41654	4.65802	4.97545	3.70519			7	Polyline3	15.1379	9.87	65.2006	34.7994			12	Polyline6	12.0528	5.82	48.2875	48.2875			2	Polyline8	14.39		0	0			14	Polyline8	10.4678	3.66	34.9644	34.9644
		5.19527	3.04662	4.95752	5.70199	4.70233	4.48037	4.78988	4.68989	5.00903	5.01958	5.42048	4.67691	4.97851	3.71649			13	Polyline6	16.3899	5.6	34.1675	34.1675			1	Polyline8	10.4908	5.05	48.1375	48.1375			3	Polyline1	19.6637		0	0			4	Polyline33	15.969	5.48	34.3166	34.3166
		5.24148	3.14705	4.96187	5.75577	4.70512	4.51245	4.82134	4.7001	5.01859	5.03215	5.42319	4.6902	4.9902	3.73658			10	Polyline37	11.223	3.72	33.1464	33.1464			12	Polyline14	12.6762	6.1	48.1215	48.1215			3	Polyline2	8.33735		0	0			6	Polyline18	7.39916	5.06	68.3861	31.6139
		5.26691	3.22968	4.98096	5.81124	4.71191	4.51322	4.84068	4.7148	5.02262	5.04084	5.42439	4.70279	5.01584	3.74683			12	Polyline16	7.58139	2.48	32.7117	32.7117			14	Polyline4	11.6504	6.05	51.9293	48.0707			3	Polyline4	8.21271		0	0			9	Polyline2	11.2683	7.89	70.0193	29.9807
		5.27085	3.81523	4.98768	5.88043	4.73493	4.51861	4.84257	4.71548	5.0393	5.09286	5.42532	4.70623	5.01862	4.05345			6	Polyline10	13.7161	4.41	32.152	32.152			12	Polyline15	12.1171	5.82	48.0313	48.0313			3	Polyline5	21.3971		0	0			12	Polyline23	8.72309	2.44	27.9717	27.9717
		5.29062	3.87108	4.9909	5.96639	4.749	4.52416	4.90094	4.7255	5.08957	5.09825	5.42555	4.71311	5.03936	4.1071			8	Polyline5	12.1125	8.51	70.2578	29.7422			2	Polyline5	11.628	5.58	47.9876	47.9876			3	Polyline6	16.2487		0	0			7	Polyline4	8.09886	5.84	72.1089	27.8911
		5.31356	3.99776	5.01615	5.97114	4.75838	4.5387	4.914	4.72652	5.10091	5.18471	5.42558	4.73204	5.03999	4.14491			6	Polyline6	7.27521	2.1	28.8652	28.8652			1	Polyline3	11.1912	5.83	52.0946	47.9054			3	Polyline7	21.6618		0	0			11	Polyline23	7.17953	1.51	21.032	21.032
		5.33772	4.04855	5.01813	5.99855	4.761	4.54255	4.92619	4.76028	5.10884	5.22597	5.43128	4.77831	5.04688	4.20096			8	Polyline4	10.5951	2.96	27.9374	27.9374			7	Polyline8	9.47932	4.98	52.5354	47.4646			4	Polyline1	12.3208		0	0			11	Polyline11	10.2903	2.08	20.2132	20.2132
		5.35804	4.08537	5.02778	6.00279	4.76279	4.57757	4.93586	4.81732	5.13197	5.28985	5.4362	4.78553	5.05362	4.22782			8	Polyline3	10.7651	3	27.8678	27.8678			3	Polyline5	10.5852	5.01	47.3304	47.3304			4	Polyline2	7.81248		0	0			7	Polyline27	6.77446	5.45	80.4493	19.5507
		5.44129	4.21171	5.03193	6.03735	4.7633	4.59036	4.93725	4.82574	5.15608	5.31177	5.45642	4.78734	5.06583	4.25069			19	Polyline11	13.5608	9.91	73.0783	26.9217			7	Polyline15	10.7147	5.73	53.4777	46.5223			4	Polyline3	5.65258		0	0			2	Polyline15	11.3694	9.33	82.0625	17.9375
		5.47979	4.42946	5.03503	6.09903	4.76547	4.637	4.9388	4.82598	5.16181	5.35539	5.4714	4.7887	5.07295	4.37847			18	Polyline10	10.4592	2.74	26.1971	26.1971			12	Polyline24	12.6884	5.9	46.4992	46.4992			4	Polyline4	16.9051		0	0			12	Polyline5	7.77509	1.21	15.5625	15.5625
		5.48008	4.54842	5.05351	6.16074	4.76776	4.64422	4.96393	4.83758	5.16413	5.3629	5.47896	4.81245	5.08127	4.39987			20	Polyline20	14.3304	10.8	75.3641	24.6359			1	Poly1	8.38528		0	0			4	Polyline5	16.2659		0	0			6	Polyline22	8.43424	7.43	88.0933	11.9067
		5.4823	4.57205	5.06854	6.17662	4.78656	4.68384	4.9915	4.83815	5.2184	5.37549	5.48624	4.8198	5.08154	4.61413			4	Polyline20	10.4117	2.51	24.1074	24.1074			1	Polyline2	7.49835		0	0			4	Line6	7.25588		0	0			1	Polyline1	8.43299		0	0
		5.50103	4.57445	5.0792	6.23068	4.80746	4.69283	4.99589	4.84108	5.23042	5.39209	5.4901	4.8253	5.10135	4.61589			8	Polyline13	10.5419	9.44	89.5472	10.4528			1	Polyline4	10.3432		0	0			4	Polyline7	14.3126		0	0			1	Polyline2	10.6162		0	0
		5.5147	4.59577	5.08334	6.25523	4.81104	4.71069	5.02272	4.84202	5.23128	5.43934	5.51419	4.8432	5.10551	4.65711			9	Line1	3.11051		0	0			1	Polyline5	9.71228		0	0			4	Polyline8	18.6612		0	0			1	Polyline3	9.49684		0	0
		5.51699	4.6038	5.08421	6.26045	4.82084	4.72924	5.02461	4.85722	5.25099	5.45017	5.51526	4.84774	5.10741	4.65879			10	Line1	8.35674		0	0			1	Polyline6	8.91047		0	0			5	Polyline1	21.2727		0	0			1	Polyline4	8.26384		0	0
		5.53455	4.65606	5.09054	6.29162	4.83415	4.75491	5.03444	4.85872	5.25726	5.4796	5.5312	4.85491	5.12704	4.679			14	Line1	7.68761		0	0			1	Polyline7	7.11648		0	0			5	Polyline2	8.89635		0	0			1	Polyline5	9.60671		0	0
		5.54741	4.65995	5.0911	6.30327	4.84023	4.76149	5.04705	4.86035	5.25901	5.48458	5.56334	4.86999	5.14003	4.70935			15	Line10	2.23849		0	0			1	Polyline9	7.90378		0	0			5	Line3	8.16856		0	0			1	Polyline6	8.74521		0	0
		5.55048	4.99985	5.0919	6.30482	4.84408	4.76928	5.06095	4.87577	5.28848	5.50221	5.56615	4.87673	5.14139	4.74144			6	Line11	5.36201		0	0			1	Polyline10	5.29283		0	0			5	Polyline4	28.0308		0	0			1	Line7	6.65576		0	0
		5.55329	5.0132	5.09893	6.30864	4.84738	4.77611	5.10222	4.88334	5.29085	5.50787	5.57805	4.87752	5.14224	4.74483			8	Line11	5.83011		0	0			1	Polyline11	5.75392		0	0			5	Polyline5	18.2962		0	0			1	Polyline8	8.12872		0	0
		5.56315	5.12707	5.09942	6.35761	4.85054	4.78208	5.10615	4.90179	5.29385	5.54588	5.5783	4.93144	5.15882	4.74492			13	Line11	7.51221		0	0			1	Line12	6.16164		0	0			5	Polyline6	17.0301		0	0			1	Polyline9	10.4374		0	0
		5.56684	5.2424	5.09964	6.36186	4.85723	4.78572	5.108	4.90304	5.29604	5.55958	5.58194	4.95587	5.15979	4.74733			2	Line12	6.34241		0	0			1	Polyline13	7.56504		0	0			5	Polyline7	19.1792		0	0			1	Polyline10	8.46852		0	0
		5.56805	5.29207	5.10488	6.40925	4.86418	4.7961	5.11708	4.90738	5.30904	5.57701	5.58219	4.95623	5.16085	4.75215			4	Line12	4.87543		0	0			1	Polyline14	8.97007		0	0			5	Polyline8	24.615		0	0			1	Line11	3.48402		0	0
		5.57551	5.3482	5.12115	6.47149	4.88896	4.80228	5.14956	4.91821	5.31518	5.58354	5.59821	4.9572	5.16634	4.76331			10	Line12	4.493		0	0			1	Polyline15	7.16092		0	0			5	Polyline9	12.7757		0	0			1	Polyline12	7.57857		0	0
		5.60283	5.35342	5.13282	6.48862	4.8982	4.81849	5.18259	4.9247	5.31893	5.59301	5.60667	4.96201	5.16886	4.80517			15	Line12	6.43631		0	0			1	Polyline16	7.67935		0	0			5	Polyline10	16.5915		0	0			1	Polyline13	11.407		0	0
		5.60462	5.41484	5.13331	6.51891	4.90702	4.82569	5.18722	4.95078	5.31912	5.61689	5.61938	4.9633	5.17226	4.81149			20	Line12	9.34283		0	0			1	Line17	5.85		0	0			6	Polyline1	8.33188		0	0			1	Polyline14	7.67229		0	0
		5.61699	5.49979	5.1371	6.52068	4.91289	4.82845	5.21843	4.9553	5.32526	5.62112	5.62638	4.96621	5.17492	4.83328			4	Line13	7.95155		0	0			1	Polyline18	7.221		0	0			6	Polyline2	9.52212		0	0			1	Polyline15	8.32504		0	0
		5.62423	5.58051	5.15508	6.52246	4.91635	4.83683	5.22231	4.95924	5.33634	5.63316	5.64024	4.96685	5.17914	4.88715			10	Line13	7.98098		0	0			1	Polyline19	7.10536		0	0			6	Polyline3	11.1272		0	0			1	Polyline16	8.04986		0	0
		5.63119	5.81003	5.1581	6.52867	4.92241	4.83683	5.22741	4.96542	5.34176	5.65736	5.65017	4.97339	5.18512	4.89546			13	Line13	1.68625		0	0			1	Polyline20	6.85767		0	0			6	Polyline4	55.5265		0	0			1	Polyline17	11.7773		0	0
		5.63126	5.94448	5.1613	6.53049	4.92938	4.84141	5.22931	4.96629	5.36644	5.65761	5.6741	4.97577	5.202	4.90504			18	Line13	7.18213		0	0			1	Polyline21	9.4765		0	0			6	Polyline5	17.824		0	0			1	Polyline18	6.79712		0	0
		5.63189	5.98696	5.16254	6.53466	4.93397	4.84361	5.23379	4.97456	5.37204	5.66745	5.67817	4.98081	5.20858	4.93893			2	Line15	4.94		0	0			1	Line22	6.86912		0	0			6	Polyline6	11.077		0	0			1	Polyline19	9.02585		0	0
		5.63921	6.05667	5.16263	6.55581	4.93951	4.84977	5.24582	5.00019	5.39049	5.67952	5.68106	4.98306	5.21605	4.97136			4	Line15	4.04152		0	0			1	Polyline24	8.53641		0	0			6	Polyline7	10.2735		0	0			1	Polyline20	12.1242		0	0
		5.64432	6.08217	5.16833	6.56436	4.94802	4.85692	5.24612	5.00657	5.39199	5.68621	5.69305	5.0022	5.22652	5.01681			8	Line15	8.30501		0	0			1	Polyline25	6.60201		0	0			6	Polyline8	22.083		0	0			1	Polyline21	5.38379		0	0
		5.64638	6.13119	5.17087	6.5922	4.95061	4.85795	5.26029	5.02269	5.40386	5.694	5.69381	5.009	5.2339	5.04973			13	Line15	3.99525		0	0			2	Polyline1	8.2505		0	0			6	Polyline9	17.778		0	0			1	Polyline22	9.37901		0	0
		5.65285	6.14617	5.17854	6.60384	4.95072	4.8616	5.26191	5.0246	5.40868	5.69914	5.69933	5.01214	5.25164	5.05709			20	Line15	6.58556		0	0			2	Polyline2	6.56167		0	0			6	Line10	8.75668		0	0			1	Polyline23	9.56172		0	0
		5.6533	6.1477	5.18089	6.60967	4.97002	4.86882	5.29062	5.02535	5.41376	5.70443	5.72889	5.01914	5.2541	5.10627			3	Line16	8.31416		0	0			2	Polyline3	6.64331		0	0			6	Polyline11	20.1252		0	0			1	Polyline24	9.80856		0	0
		5.68533	6.19436	5.18401	6.65102	4.97957	4.88723	5.30584	5.02757	5.41643	5.71938	5.7315	5.02022	5.2576	5.10982			8	Line16	1.50766		0	0			2	Polyline4	9.41697		0	0			7	Polyline1	14.2795		0	0			2	Polyline1	6.8485		0	0
		5.70819	6.27017	5.18452	6.72283	4.98995	4.88837	5.33364	5.03103	5.42876	5.73541	5.7352	5.02469	5.27098	5.11217			9	Line16	2.79576		0	0			2	Polyline6	9.24048		0	0			7	Polyline2	28.9221		0	0			2	Polyline2	9.68416		0	0
		5.70954	6.28666	5.18577	6.76788	5.00106	4.90215	5.34339	5.03645	5.43184	5.74071	5.75095	5.03619	5.2742	5.20036			13	Line16	6.11311		0	0			2	Polyline7	8.46204		0	0			7	Polyline3	12.8532		0	0			2	Polyline3	7.63793		0	0
		5.73328	6.31675	5.18794	6.78368	5.00288	4.90499	5.35117	5.04116	5.43723	5.75393	5.76286	5.03703	5.28235	5.21188			19	Line16	5.85902		0	0			2	Polyline9	9.26901		0	0			7	Polyline4	26.4941		0	0			2	Polyline4	7.75899		0	0
		5.74681	6.3476	5.19149	6.78369	5.01066	4.93868	5.35711	5.04151	5.44698	5.75704	5.76303	5.05663	5.28288	5.25687			9	Line17	7.01579		0	0			2	Polyline10	7.67005		0	0			7	Polyline5	13.5103		0	0			2	Polyline5	7.83777		0	0
		5.75851	6.38714	5.21295	6.82248	5.01239	4.96282	5.37188	5.04349	5.46058	5.76077	5.76772	5.05971	5.29516	5.26598			1	Line2	8.15096		0	0			2	Polyline11	7.87512		0	0			7	Polyline6	18.2833		0	0			2	Polyline6	7.64444		0	0
		5.75853	6.46369	5.21484	6.84576	5.02023	4.97148	5.39583	5.04428	5.4612	5.77033	5.7837	5.08345	5.29632	5.30622			7	Line2	6.44681		0	0			2	Polyline12	8.77244		0	0			7	Line7	1.9769		0	0			2	Polyline7	8.35427		0	0
		5.76003	6.46731	5.21632	6.90217	5.03251	4.97552	5.40367	5.06374	5.47026	5.79361	5.79696	5.0852	5.30037	5.31406			14	Line2	6.51979		0	0			2	Line13	6.80299		0	0			7	Polyline8	13.5224		0	0			2	Polyline8	6.6309		0	0
		5.76097	6.48683	5.2186	6.90636	5.0339	4.98124	5.40706	5.10537	5.47673	5.80888	5.79748	5.09532	5.30216	5.33474			16	Line2	5.01807		0	0			2	Polyline14	11.146		0	0			7	Polyline9	19.1423		0	0			2	Polyline9	11.8831		0	0
		5.77938	6.49445	5.23131	6.9145	5.03973	4.98223	5.41123	5.10689	5.47763	5.82777	5.80521	5.10149	5.30462	5.35413			17	Line2	8.09765		0	0			2	Polyline15	9.54368		0	0			7	Polyline10	9.44175		0	0			2	Line10	6.71044		0	0
		5.78216	6.54609	5.23371	6.92511	5.04733	4.98464	5.41808	5.10835	5.48848	5.83242	5.80535	5.11291	5.30769	5.35484			10	Line20	6.63541		0	0			2	Polyline16	7.70718		0	0			7	Polyline11	10.7524		0	0			2	Polyline12	8.45049		0	0
		5.78776	6.58816	5.23999	6.96734	5.04808	4.98811	5.419	5.11436	5.49171	5.83375	5.82213	5.12128	5.31503	5.3959			10	Line26	2.36246		0	0			3	Line1	7.05272		0	0			7	Polyline12	10.2892		0	0			2	Polyline13	7.62072		0	0
		5.78792	6.59283	5.24254	6.96766	5.05338	4.98898	5.42935	5.11904	5.50384	5.85976	5.83367	5.13594	5.32121	5.39751			2	Line3	3.50578		0	0			3	Polyline2	7.89807		0	0			7	Polyline13	17.6015		0	0			2	Polyline14	6.93587		0	0
		5.79892	6.61657	5.24448	6.97106	5.05481	4.99305	5.44277	5.15732	5.50632	5.86201	5.86058	5.13814	5.32297	5.39926			10	Line30	3.26038		0	0			3	Polyline3	9.85739		0	0			7	Polyline14	8.91221		0	0			2	Polyline16	7.72245		0	0
		5.80047	6.63737	5.24874	7.01808	5.05864	4.99407	5.46059	5.15836	5.5156	5.86205	5.87713	5.14846	5.32643	5.41266			10	Line33	5.93247		0	0			3	Polyline4	6.84347		0	0			8	Polyline1	13.1161		0	0			2	Polyline19	8.93945		0	0
		5.81164	6.65603	5.26815	7.0625	5.06122	5.01714	5.46867	5.16012	5.52912	5.86369	5.89737	5.15395	5.33227	5.42864			10	Line34	6.62107		0	0			3	Polyline6	8.7123		0	0			8	Polyline2	8.37644		0	0			2	Polyline20	5.61839		0	0
		5.8288	6.65759	5.27206	7.07167	5.07916	5.01861	5.48481	5.17472	5.54002	5.87744	5.90115	5.16074	5.33311	5.4427			10	Line35	3.08185		0	0			3	Polyline7	6.87405		0	0			8	Polyline3	7.86839		0	0			2	Polyline21	9.48761		0	0
		5.84058	6.65947	5.27735	7.0797	5.07932	5.02237	5.52324	5.18335	5.54339	5.87826	5.90323	5.16834	5.33413	5.44438			9	Line4	5.44799		0	0			3	Polyline8	7.78022		0	0			8	Polyline4	9.70733		0	0			2	Polyline22	17.4709		0	0
		5.84576	6.69245	5.27799	7.10286	5.08008	5.02566	5.52466	5.18477	5.54454	5.87828	5.92762	5.16846	5.34838	5.56626			18	Line4	6.12692		0	0			3	Polyline9	6.06759		0	0			8	Polyline5	6.8522		0	0			2	Polyline23	6.00752		0	0
		5.84603	6.71611	5.28293	7.10874	5.08653	5.03085	5.53338	5.18813	5.54589	5.88646	5.93074	5.17355	5.34948	5.56661			7	Line5	4.25886		0	0			3	Polyline10	6.06171		0	0			8	Polyline6	10.011		0	0			2	Polyline25	6.34055		0	0
		5.86644	6.80607	5.28491	7.18008	5.0874	5.04747	5.53384	5.18954	5.54623	5.89363	5.93141	5.18088	5.34975	5.6087			2	Line6	5.2974		0	0			3	Line11	6.9553		0	0			8	Polyline7	9.67506		0	0			3	Polyline1	8.96889		0	0
		5.87143	6.81392	5.28764	7.20312	5.08781	5.04789	5.55582	5.19382	5.55189	5.91631	5.93872	5.18641	5.36136	5.61074			4	Line6	6.99709		0	0			3	Polyline12	8.73197		0	0			8	Line8	1.56271		0	0			3	Line2	6.52239		0	0
		5.87435	6.82359	5.29071	7.20799	5.09437	5.05064	5.56639	5.21903	5.55365	5.9505	5.93948	5.19176	5.36772	5.61777			9	Line6	3.93451		0	0			3	Line13	6.63127		0	0			8	Polyline9	7.18738		0	0			3	Polyline3	6.99998		0	0
		5.87513	6.84434	5.29133	7.21913	5.09986	5.05297	5.56652	5.22523	5.55435	5.95273	5.9412	5.19303	5.36899	5.62225			16	Line6	5.23926		0	0			3	Polyline14	7.65027		0	0			8	Polyline10	14.7942		0	0			3	Polyline4	9.89019		0	0
		5.88257	6.8664	5.29591	7.22461	5.09991	5.06001	5.5729	5.2262	5.56008	5.9558	5.9419	5.19314	5.3712	5.62617			5	Line7	3.05984		0	0			3	Polyline15	10.5498		0	0			8	Polyline11	9.14533		0	0			3	Line5	4.88366		0	0
		5.89727	6.94257	5.2989	7.30414	5.10158	5.06209	5.57332	5.22886	5.56132	5.95808	5.94751	5.20817	5.37284	5.66803			9	Line7	9.97067		0	0			3	Polyline16	9.81455		0	0			8	Polyline12	8.75947		0	0			3	Polyline6	7.8016		0	0
		5.90369	6.94428	5.30157	7.32188	5.10283	5.06709	5.5753	5.22903	5.56345	5.95904	5.9515	5.21475	5.37477	5.71342			4	Line8	1.78484		0	0			3	Polyline17	6.85611		0	0			9	Polyline1	15.8738		0	0			3	Polyline7	9.82546		0	0
		5.91773	6.98808	5.30241	7.3668	5.10439	5.07344	5.5943	5.23075	5.56442	5.9595	5.95725	5.21512	5.38256	5.75604			17	Line8	6.9553		0	0			3	Polyline18	6.30669		0	0			9	Polyline2	9.81485		0	0			3	Line8	7.67908		0	0
		5.92145	7.01287	5.30422	7.37228	5.10681	5.085	5.60989	5.23628	5.56491	5.96461	5.96917	5.21822	5.38784	5.76528			5	Line9	6.8005		0	0			3	Polyline19	7.5585		0	0			9	Polyline3	21.1835		0	0			3	Polyline9	6.36911		0	0
		5.92584	7.04747	5.3165	7.37612	5.10787	5.09535	5.61652	5.23784	5.56586	5.98836	5.9694	5.22155	5.39722	5.80224			10	Line9	4.29197		0	0			3	Polyline20	8.06416		0	0			9	Polyline4	19.1501		0	0			3	Polyline10	12.9379		0	0
		5.93346	7.1101	5.31666	7.43159	5.11666	5.09616	5.61713	5.24362	5.56739	6.01404	5.97598	5.23188	5.40195	5.82196			19	Line9	3.39559		0	0			3	Polyline21	6.31063		0	0			9	Polyline6	8.42603		0	0			3	Polyline11	11.3401		0	0
		5.95017	7.11949	5.32114	7.44257	5.11673	5.09708	5.62769	5.24814	5.57144	6.03002	6.00198	5.23308	5.40285	5.83308			1	Polyline1	9.52065		0	0			4	Polyline2	9.19681		0	0			9	Polyline7	13.3124		0	0			3	Polyline12	12.0899		0	0
		5.95233	7.14141	5.32688	7.44732	5.12081	5.10062	5.62951	5.25011	5.57734	6.0305	6.02222	5.23711	5.42286	5.83319			2	Polyline1	14.5257		0	0			4	Polyline3	6.23259		0	0			9	Polyline8	25.2216		0	0			3	Line13	8.53086		0	0
		5.95414	7.21123	5.32982	7.46457	5.13799	5.10094	5.63722	5.25483	5.58063	6.04	6.03026	5.24987	5.42561	5.84656			3	Polyline1	8.19477		0	0			4	Line4	7.40258		0	0			10	Polyline1	19.2779		0	0			3	Polyline14	8.07478		0	0
		5.95459	7.21451	5.34185	7.46571	5.14026	5.10607	5.67638	5.26526	5.58284	6.04126	6.03461	5.25685	5.4264	5.88349			5	Polyline1	7.34956		0	0			4	Polyline5	7.20293		0	0			10	Polyline2	9.4744		0	0			3	Polyline15	5.87919		0	0
		5.95946	7.22487	5.34585	7.49254	5.14691	5.10959	5.67985	5.27082	5.58529	6.04666	6.04241	5.26186	5.42656	5.94859			6	Polyline1	9.88999		0	0			4	Polyline7	6.39172		0	0			10	Polyline3	14.0268		0	0			3	Polyline16	6.85754		0	0
		5.96644	7.2434	5.3524	7.49801	5.15251	5.11859	5.6856	5.27233	5.59051	6.05901	6.05545	5.26714	5.43749	5.95749			7	Polyline1	12.1266		0	0			4	Polyline8	5.32523		0	0			10	Polyline4	20.8715		0	0			3	Polyline17	10.2162		0	0
		5.96931	7.26536	5.35614	7.51857	5.15252	5.12317	5.68782	5.27477	5.5912	6.06754	6.06183	5.26883	5.44321	5.98899			8	Polyline1	5.88119		0	0			4	Line9	7.29305		0	0			10	Polyline5	15.4992		0	0			3	Polyline18	8.32615		0	0
		5.98667	7.3296	5.36684	7.52302	5.15608	5.12376	5.69022	5.27792	5.59257	6.06914	6.06597	5.28643	5.45185	5.99108			11	Polyline1	4.5876		0	0			4	Polyline10	7.80008		0	0			10	Polyline6	18.0597		0	0			3	Polyline19	6.93048		0	0
		5.99071	7.3419	5.37059	7.53713	5.15793	5.1239	5.6954	5.28165	5.5986	6.07618	6.06687	5.28836	5.45629	6.01335			12	Polyline1	6.38827		0	0			4	Polyline11	7.89166		0	0			10	Polyline7	18.6039		0	0			3	Polyline20	7.95262		0	0
		5.99144	7.37259	5.37398	7.56524	5.15956	5.13091	5.69936	5.28456	5.60599	6.0801	6.0737	5.29449	5.46245	6.01653			13	Polyline1	7.22465		0	0			4	Line13	7.81353		0	0			10	Polyline8	18.0886		0	0			3	Polyline21	11.8991		0	0
		5.99625	7.3874	5.37749	7.6064	5.1598	5.14335	5.70586	5.30727	5.60646	6.08235	6.07464	5.29714	5.47083	6.02253			15	Polyline1	6.60263		0	0			4	Polyline14	7.03128		0	0			10	Polyline9	5.70246		0	0			3	Line22	5.81741		0	0
		6.00515	7.40891	5.38017	7.61846	5.16162	5.14513	5.72984	5.31145	5.61098	6.08554	6.07531	5.29815	5.47136	6.08982			16	Polyline1	5.79098		0	0			4	Polyline15	7.54895		0	0			11	Polyline1	12.0868		0	0			3	Line23	6.16404		0	0
		6.01143	7.41702	5.38354	7.63078	5.1706	5.14723	5.74369	5.3294	5.61645	6.08935	6.07918	5.29829	5.47287	6.10053			17	Polyline1	17.9578		0	0			4	Line16	5.48625		0	0			11	Polyline2	11.561		0	0			3	Polyline24	9.70718		0	0
		6.01499	7.43769	5.3879	7.6459	5.17706	5.14896	5.74456	5.33364	5.61903	6.09382	6.08004	5.30704	5.47953	6.1264			18	Polyline1	11.0601		0	0			4	Polyline17	7.48891		0	0			11	Polyline3	15.0029		0	0			3	Polyline26	6.79967		0	0
		6.01916	7.44527	5.39144	7.64734	5.18307	5.15005	5.74721	5.35562	5.62116	6.09811	6.08825	5.31337	5.48849	6.14389			19	Polyline1	12.5912		0	0			4	Polyline18	7.62788		0	0			11	Polyline4	15.9653		0	0			3	Polyline27	8.18695		0	0
		6.02058	7.50323	5.40074	7.66833	5.18431	5.15499	5.74897	5.36171	5.62423	6.1155	6.09261	5.31624	5.48941	6.15683			20	Polyline1	10.7274		0	0			4	Polyline19	8.34737		0	0			11	Polyline5	15.7609		0	0			3	Polyline28	9.75438		0	0
		6.02424	7.52105	5.40966	7.70908	5.21215	5.15547	5.75356	5.37186	5.62649	6.11836	6.09695	5.31798	5.49043	6.15722			1	Polyline10	11.675		0	0			4	Polyline20	11.5898		0	0			11	Polyline6	26.5702		0	0			4	Line1	4.50192		0	0
		6.02606	7.53268	5.4125	7.72305	5.21484	5.15566	5.75572	5.37841	5.62941	6.12495	6.09945	5.32267	5.49388	6.16829			2	Polyline10	3.71411		0	0			4	Polyline21	7.10721		0	0			11	Polyline7	22.4741		0	0			4	Polyline2	12.9984		0	0
		6.0325	7.53358	5.42963	7.72599	5.21573	5.15951	5.76326	5.37982	5.63075	6.12518	6.1042	5.32577	5.50119	6.18561			3	Polyline10	6.6745		0	0			4	Line22	6.42284		0	0			11	Polyline8	16.5541		0	0			4	Polyline3	10.5513		0	0
		6.0409	7.58031	5.43123	7.73689	5.21663	5.16024	5.76596	5.38067	5.63901	6.12723	6.10466	5.33	5.50802	6.19075			4	Polyline10	8.88971		0	0			4	Line23	6.11311		0	0			12	Polyline1	8.5161		0	0			4	Polyline4	15.2135		0	0
		6.05666	7.59279	5.43173	7.74315	5.22222	5.16301	5.77001	5.38341	5.64016	6.12976	6.12716	5.33458	5.50813	6.20344			5	Polyline10	19.1889		0	0			4	Polyline25	7.97363		0	0			12	Polyline2	8.01013		0	0			4	Polyline5	5.94829		0	0
		6.0603	7.6387	5.4418	7.74978	5.22571	5.16944	5.77347	5.38588	5.6404	6.14633	6.13316	5.33614	5.51432	6.23543			8	Polyline10	10.1108		0	0			4	Polyline26	8.38048		0	0			12	Polyline3	27.1879		0	0			4	Polyline6	8.46115		0	0
		6.0653	7.64141	5.44181	7.76531	5.23465	5.17265	5.78517	5.39335	5.64289	6.16638	6.14143	5.34485	5.5154	6.23834			9	Polyline10	15.6414		0	0			5	Polyline1	12.3408		0	0			12	Polyline4	9.39379		0	0			4	Polyline8	15.6098		0	0
		6.06698	7.65205	5.44521	7.7671	5.23574	5.18	5.78517	5.40479	5.65085	6.17797	6.14181	5.35013	5.51582	6.25983			10	Polyline10	10.7914		0	0			5	Polyline2	9.36017		0	0			12	Polyline5	6.95933		0	0			4	Polyline9	9.03741		0	0
		6.08226	7.76114	5.46142	7.77831	5.2377	5.18579	5.79757	5.40607	5.65595	6.18049	6.14879	5.3588	5.52439	6.27369			11	Polyline10	11.5779		0	0			5	Polyline3	9.70546		0	0			12	Polyline6	7.09101		0	0			4	Polyline10	10.1772		0	0
		6.08556	7.78826	5.4716	7.80038	5.23986	5.18628	5.80564	5.41286	5.66926	6.18625	6.15203	5.36196	5.54165	6.29286			12	Polyline10	10.6027		0	0			5	Polyline4	9.14445		0	0			12	Polyline7	9.5088		0	0			4	Polyline11	9.75776		0	0
		6.08795	7.88851	5.4718	7.80375	5.25948	5.19431	5.81182	5.42093	5.68101	6.2101	6.16227	5.36611	5.54876	6.35155			13	Polyline10	12.8167		0	0			5	Polyline5	8.08491		0	0			12	Polyline8	10.3464		0	0			4	Polyline12	10.8068		0	0
		6.09745	7.89373	5.47544	7.81259	5.26513	5.19677	5.81233	5.42684	5.68554	6.2125	6.16246	5.36667	5.5516	6.35648			14	Polyline10	7.96666		0	0			5	Polyline6	12.2257		0	0			13	Polyline1	6.78267		0	0			4	Polyline13	7.08587		0	0
		6.10615	7.90687	5.47591	7.8713	5.26551	5.20069	5.82301	5.43263	5.70161	6.21312	6.16583	5.36668	5.55427	6.42577			16	Polyline10	10.6564		0	0			5	Polyline8	10.5426		0	0			13	Polyline2	13.9074		0	0			4	Polyline14	7.5706		0	0
		6.10619	7.91083	5.47878	7.89064	5.26811	5.20316	5.82515	5.4402	5.70188	6.21552	6.16628	5.37965	5.55468	6.4523			17	Polyline10	13.1523		0	0			5	Polyline9	6.4465		0	0			13	Polyline3	10.0277		0	0			4	Polyline15	10.1223		0	0
		6.1103	7.91211	5.48604	7.90486	5.27132	5.21224	5.8308	5.44731	5.7022	6.21605	6.16875	5.37979	5.55798	6.45801			19	Polyline10	12.5954		0	0			5	Polyline10	8.91223		0	0			13	Polyline4	8.2425		0	0			4	Polyline16	7.50399		0	0
		6.12979	8.00603	5.48845	7.9058	5.27182	5.21341	5.85061	5.44985	5.70913	6.21849	6.1819	5.38123	5.55974	6.45856			20	Polyline10	3.67214		0	0			5	Line11	6.75656		0	0			13	Polyline5	7.42031		0	0			4	Polyline17	7.82109		0	0
		6.13386	8.0277	5.49449	7.91556	5.27588	5.21453	5.8588	5.46444	5.71534	6.22236	6.18882	5.38522	5.56019	6.46093			2	Polyline11	9.30333		0	0			5	Line12	5.55817		0	0			13	Polyline6	15.7709		0	0			4	Polyline18	6.01521		0	0
		6.13914	8.0342	5.49574	7.92061	5.27714	5.21871	5.87548	5.46583	5.71741	6.23674	6.197	5.40679	5.56123	6.46372			3	Polyline11	9.35469		0	0			5	Line13	6.65576		0	0			13	Polyline7	12.3396		0	0			4	Line19	9.91159		0	0
		6.15734	8.06721	5.49807	7.96252	5.27755	5.22852	5.87668	5.4687	5.72128	6.23864	6.20623	5.41643	5.56141	6.4968			4	Polyline11	9.53437		0	0			5	Polyline14	6.32548		0	0			13	Polyline8	17.3521		0	0			4	Polyline20	8.63088		0	0
		6.15807	8.0807	5.49993	7.96613	5.27927	5.23056	5.8798	5.4763	5.72153	6.23871	6.2083	5.41938	5.56311	6.51412			5	Polyline11	8.32352		0	0			5	Polyline15	9.27889		0	0			13	Polyline9	12.5499		0	0			4	Polyline21	7.41339		0	0
		6.16174	8.08318	5.50705	7.96976	5.28114	5.23675	5.88226	5.48	5.72459	6.24594	6.21121	5.4223	5.56604	6.51448			9	Polyline11	16.2975		0	0			5	Polyline16	9.25915		0	0			13	Polyline10	16.0281		0	0			4	Polyline22	10.3398		0	0
		6.16523	8.09127	5.50806	8.01051	5.28873	5.23798	5.89235	5.4855	5.73986	6.2489	6.21239	5.4241	5.57219	6.53486			10	Polyline11	14.9656		0	0			5	Polyline17	7.33761		0	0			13	Polyline11	19.4932		0	0			4	Polyline23	9.26091		0	0
		6.16948	8.09819	5.52619	8.02007	5.28911	5.24663	5.89622	5.49478	5.74079	6.26228	6.22593	5.42551	5.57318	6.54492			11	Polyline11	5.87273		0	0			5	Polyline18	11.6022		0	0			14	Polyline1	10.1513		0	0			4	Line24	4.97494		0	0
		6.18281	8.1016	5.53345	8.07909	5.28921	5.25281	5.90658	5.49711	5.75149	6.26838	6.22868	5.43143	5.58275	6.57731			12	Polyline11	9.15134		0	0			5	Polyline19	8.41727		0	0			14	Polyline2	38.0716		0	0			4	Polyline25	4.82268		0	0
		6.18731	8.13727	5.54007	8.09775	5.30191	5.25456	5.90793	5.49825	5.75386	6.27222	6.23485	5.4325	5.59182	6.59369			15	Polyline11	8.03982		0	0			6	Polyline1	6.29751		0	0			14	Polyline3	10.7247		0	0			4	Polyline26	11.8208		0	0
		6.19014	8.15588	5.54324	8.13349	5.30658	5.25659	5.91764	5.50216	5.75535	6.2793	6.23658	5.43369	5.59727	6.60116			17	Polyline11	9.96403		0	0			6	Polyline2	6.1143		0	0			14	Polyline4	13.9051		0	0			4	Polyline27	12.1268		0	0
		6.19474	8.16806	5.54641	8.15714	5.31625	5.25773	5.92184	5.51735	5.75537	6.28441	6.2393	5.44197	5.60368	6.60579			18	Polyline11	7.09603		0	0			6	Line3	5.61639		0	0			14	Polyline5	14.0359		0	0			4	Polyline28	8.23342		0	0
		6.19651	8.19102	5.54925	8.16597	5.31659	5.2588	5.92391	5.52023	5.75824	6.29451	6.23947	5.44243	5.60513	6.61869			20	Polyline11	7.64828		0	0			6	Polyline5	10.1533		0	0			14	Polyline6	23.9834		0	0			4	Polyline29	8.6832		0	0
		6.20073	8.22257	5.55919	8.1972	5.31787	5.25889	5.92497	5.52681	5.75927	6.30228	6.24575	5.44283	5.61497	6.62369			1	Polyline12	6.87891		0	0			6	Line6	6.1062		0	0			14	Polyline7	11.1788		0	0			4	Polyline30	12.4464		0	0
		6.20161	8.22482	5.56258	8.20972	5.31881	5.25985	5.93385	5.52693	5.75983	6.31287	6.24747	5.4439	5.61828	6.66509			3	Polyline12	8.23435		0	0			6	Polyline7	10.2481		0	0			14	Line8	1.98968		0	0			4	Polyline31	8.84641		0	0
		6.21467	8.25031	5.56535	8.21578	5.32065	5.26211	5.93984	5.52724	5.7639	6.3216	6.24923	5.44855	5.62402	6.72682			5	Polyline12	10.2325		0	0			6	Polyline8	7.83896		0	0			14	Polyline9	16.9485		0	0			4	Polyline32	9.42395		0	0
		6.22183	8.265	5.56542	8.26881	5.32446	5.26544	5.94135	5.54793	5.76695	6.32766	6.2518	5.45359	5.6266	6.74438			6	Polyline12	8.47388		0	0			6	Polyline9	6.80146		0	0			14	Polyline10	8.76622		0	0			5	Polyline1	7.64708		0	0
		6.2406	8.27284	5.57294	8.28729	5.3263	5.26932	5.94987	5.55096	5.76761	6.32854	6.25377	5.46493	5.63355	6.74632			8	Polyline12	9.34464		0	0			6	Polyline10	6.58142		0	0			14	Polyline11	27.2462		0	0			5	Polyline2	8.09536		0	0
		6.24314	8.27574	5.5733	8.29908	5.33283	5.27246	5.95001	5.5562	5.77047	6.32922	6.25494	5.46696	5.63466	6.78052			9	Polyline12	18.634		0	0			6	Polyline11	8.62037		0	0			14	Polyline12	10.5437		0	0			5	Polyline3	7.77635		0	0
		6.24372	8.28182	5.59025	8.36801	5.33545	5.27336	5.95898	5.55768	5.77389	6.34321	6.25588	5.48125	5.63916	6.79968			11	Polyline12	15.4977		0	0			6	Polyline12	6.28237		0	0			14	Polyline13	7.54468		0	0			5	Polyline4	8.09586		0	0
		6.26188	8.2927	5.59113	8.38264	5.33705	5.27372	5.96883	5.56002	5.77554	6.34451	6.25802	5.4836	5.63954	6.81213			12	Polyline12	14.2051		0	0			6	Polyline13	8.92586		0	0			14	Polyline14	19.07		0	0			5	Polyline5	7.36128		0	0
		6.265	8.31605	5.60423	8.38326	5.33745	5.27832	5.98066	5.56665	5.77973	6.38165	6.26513	5.49671	5.64158	6.85246			18	Polyline12	10.3676		0	0			6	Line14	7.31965		0	0			14	Polyline15	9.05222		0	0			5	Polyline6	11.307		0	0
		6.27045	8.36917	5.6157	8.3852	5.34449	5.27926	5.98214	5.56948	5.78507	6.38389	6.26794	5.50485	5.64228	6.85359			19	Polyline12	6.45279		0	0			6	Line16	8.06236		0	0			14	Polyline16	11.2587		0	0			5	Polyline7	8.05071		0	0
		6.27479	8.37262	5.61591	8.41859	5.3492	5.28095	5.99964	5.5706	5.79789	6.38563	6.27674	5.50697	5.64682	6.86194			2	Polyline13	11.3079		0	0			6	Polyline17	8.08803		0	0			14	Polyline17	9.59456		0	0			5	Polyline8	9.03407		0	0
		6.27644	8.37497	5.62146	8.42805	5.35549	5.28288	6.00067	5.57275	5.80089	6.38624	6.27684	5.50827	5.65195	6.86775			3	Polyline13	24.7039		0	0			6	Polyline18	8.0842		0	0			14	Polyline18	11.947		0	0			5	Polyline9	7.83746		0	0
		6.27779	8.42305	5.62332	8.43672	5.35662	5.28366	6.01119	5.58266	5.80636	6.3914	6.2781	5.50909	5.66639	6.87674			5	Polyline13	7.27115		0	0			6	Polyline19	7.58438		0	0			14	Polyline19	12.0639		0	0			5	Polyline10	10.2145		0	0
		6.28009	8.42356	5.62599	8.46742	5.36445	5.28805	6.01583	5.58342	5.8129	6.39289	6.28725	5.51732	5.66915	6.91018			6	Polyline13	7.04755		0	0			7	Polyline1	6.02268		0	0			14	Line20	7.914		0	0			5	Polyline11	10.2671		0	0
		6.28063	8.43112	5.63449	8.47606	5.36651	5.29235	6.01666	5.58813	5.81976	6.40217	6.28962	5.51787	5.6746	6.96485			9	Polyline13	8.97993		0	0			7	Polyline2	9.30466		0	0			14	Polyline21	11.4779		0	0			5	Polyline12	6.62539		0	0
		6.29445	8.46817	5.63766	8.49613	5.36734	5.30143	6.01904	5.59105	5.82254	6.40497	6.29774	5.51921	5.68574	6.96921			12	Polyline13	16.0311		0	0			7	Polyline3	8.17692		0	0			14	Polyline22	9.40248		0	0			5	Polyline13	8.98064		0	0
		6.29589	8.49591	5.64913	8.50068	5.36987	5.30164	6.03409	5.59401	5.82979	6.41058	6.31387	5.51933	5.68639	6.97521			15	Polyline13	18.8848		0	0			7	Line4	6.62139		0	0			14	Polyline23	8.64577		0	0			5	Polyline14	11.3117		0	0
		6.2963	8.56107	5.65536	8.50179	5.37137	5.30254	6.03704	5.60175	5.83502	6.41159	6.33531	5.52033	5.68802	6.98321			17	Polyline13	21.026		0	0			7	Line5	6.3753		0	0			14	Polyline24	11.4948		0	0			5	Line15	9.73634		0	0
		6.30457	8.57989	5.6572	8.52811	5.37639	5.3057	6.03866	5.60231	5.84047	6.41978	6.34069	5.53562	5.68836	6.98624			19	Polyline13	9.88633		0	0			7	Line6	7.36826		0	0			14	Polyline25	9.34156		0	0			5	Polyline16	7.61155		0	0
		6.3059	8.5863	5.65836	8.53375	5.37667	5.30797	6.05176	5.6114	5.84339	6.44021	6.342	5.53619	5.69494	6.9927			20	Polyline13	7.87113		0	0			7	Polyline7	7.99189		0	0			14	Polyline26	15.6065		0	0			5	Polyline17	8.79228		0	0
		6.30658	8.60926	5.66449	8.55092	5.3795	5.30976	6.05901	5.61327	5.84505	6.44465	6.34417	5.53778	5.70296	7.00068			2	Polyline14	8.30662		0	0			7	Polyline9	8.35636		0	0			14	Polyline27	8.77332		0	0			5	Polyline18	7.0263		0	0
		6.31036	8.62058	5.66824	8.55495	5.3823	5.31134	6.06707	5.61489	5.85737	6.45073	6.34508	5.53875	5.71383	7.00142			3	Polyline14	8.68248		0	0			7	Polyline10	10.2369		0	0			14	Polyline28	9.74802		0	0			5	Polyline19	6.66009		0	0
		6.31736	8.62757	5.66908	8.55997	5.38279	5.31301	6.07732	5.61541	5.86255	6.46643	6.34543	5.54315	5.71842	7.0235			4	Polyline14	9.93579		0	0			7	Polyline11	8.81013		0	0			14	Polyline29	11.9457		0	0			5	Line20	11.5021		0	0
		6.32822	8.63403	5.67341	8.56865	5.38492	5.31367	6.08239	5.61808	5.87089	6.46955	6.34799	5.54727	5.72401	7.03087			5	Polyline14	18.8621		0	0			7	Polyline12	8.66444		0	0			14	Polyline30	4.75582		0	0			5	Polyline21	5.86295		0	0
		6.33136	8.63655	5.68132	8.58216	5.39112	5.31533	6.08688	5.61819	5.87148	6.46992	6.35134	5.55372	5.72896	7.0428			6	Polyline14	11.4272		0	0			7	Polyline13	10.4378		0	0			14	Polyline31	19.8833		0	0			5	Polyline22	8.79278		0	0
		6.33588	8.67194	5.68327	8.60562	5.39605	5.32684	6.08848	5.61896	5.87331	6.47201	6.3541	5.55527	5.73328	7.0621			8	Polyline14	5.28632		0	0			7	Polyline14	9.76329		0	0			15	Polyline1	10.0635		0	0			5	Polyline24	7.26476		0	0
		6.341	8.67968	5.68406	8.60822	5.39966	5.32917	6.08875	5.62077	5.87414	6.47367	6.35643	5.55596	5.73359	7.06374			9	Polyline14	7.35478		0	0			7	Polyline17	9.96583		0	0			15	Polyline2	17.5286		0	0			5	Polyline25	6.98783		0	0
		6.34168	8.68361	5.68612	8.61234	5.40004	5.33226	6.0905	5.62324	5.87495	6.47383	6.38221	5.55654	5.74111	7.08834			10	Polyline14	9.32278		0	0			7	Polyline18	9.50509		0	0			15	Polyline3	9.58869		0	0			5	Polyline26	5.97626		0	0
		6.3453	8.70622	5.68682	8.61814	5.4172	5.33348	6.09055	5.63055	5.88713	6.47559	6.38991	5.5567	5.74173	7.1046			12	Polyline14	5.6492		0	0			7	Polyline19	11.2406		0	0			15	Polyline4	24.8001		0	0			5	Polyline27	7.16818		0	0
		6.36159	8.73234	5.68767	8.62945	5.4215	5.3347	6.09148	5.63132	5.8881	6.47716	6.39271	5.55811	5.74307	7.10925			13	Polyline14	7.71559		0	0			7	Polyline20	7.94053		0	0			15	Polyline5	14.6666		0	0			5	Polyline28	8.74102		0	0
		6.36503	8.7394	5.68957	8.65076	5.42219	5.33855	6.09401	5.63437	5.88944	6.47781	6.39495	5.56193	5.74314	7.12072			15	Polyline14	9.58935		0	0			7	Polyline21	8.27287		0	0			15	Polyline6	16.8702		0	0			5	Polyline29	6.40744		0	0
		6.36706	8.74667	5.6913	8.65607	5.42297	5.34379	6.09453	5.64244	5.8921	6.48083	6.39515	5.56331	5.7443	7.12677			17	Polyline14	7.95126		0	0			8	Polyline1	6.7695		0	0			15	Polyline7	20.2239		0	0			5	Polyline30	6.09243		0	0
		6.37514	8.77635	5.69244	8.65642	5.42405	5.34632	6.13019	5.65099	5.89877	6.48361	6.39791	5.56549	5.74576	7.15594			18	Polyline14	8.2202		0	0			8	Polyline3	10.4355		0	0			15	Polyline8	6.11139		0	0			5	Polyline31	9.62069		0	0
		6.37654	8.77835	5.69278	8.67092	5.42588	5.34889	6.13416	5.66856	5.90144	6.48659	6.39802	5.56688	5.75952	7.15914			19	Polyline14	7.18872		0	0			8	Polyline4	9.2417		0	0			15	Polyline9	12.09		0	0			6	Polyline1	5.77362		0	0
		6.38024	8.79038	5.69322	8.68157	5.4266	5.35167	6.14379	5.67057	5.90304	6.48754	6.40204	5.56834	5.76393	7.19023			20	Polyline14	28.3508		0	0			8	Polyline5	7.25148		0	0			15	Polyline10	18.1203		0	0			6	Line2	7.9876		0	0
		6.38536	8.81484	5.69405	8.68783	5.42973	5.35267	6.14537	5.67115	5.91515	6.49101	6.40381	5.5701	5.76705	7.19823			3	Polyline15	8.45722		0	0			8	Polyline6	9.33105		0	0			15	Polyline12	6.39325		0	0			6	Polyline3	11.5004		0	0
		6.39674	8.84162	5.69682	8.72457	5.43543	5.35631	6.15015	5.68509	5.91763	6.49581	6.40421	5.5711	5.76723	7.20256			5	Polyline15	6.01902		0	0			8	Polyline7	5.97673		0	0			15	Polyline13	18.1878		0	0			6	Line4	5.9927		0	0
		6.39842	8.86694	5.69828	8.74263	5.43639	5.35643	6.17599	5.68838	5.92362	6.50086	6.40571	5.58215	5.76934	7.21447			6	Polyline15	36.5653		0	0			8	Polyline8	5.61238		0	0			15	Polyline14	29.059		0	0			6	Polyline5	7.8106		0	0
		6.40657	8.88778	5.69847	8.75938	5.44823	5.35719	6.19525	5.68968	5.94096	6.50126	6.41842	5.58848	5.77097	7.22128			9	Polyline15	10.2168		0	0			8	Polyline9	7.5433		0	0			15	Polyline15	9.83551		0	0			6	Polyline6	7.608		0	0
		6.40792	8.9043	5.70217	8.78317	5.45097	5.35798	6.19537	5.68996	5.95276	6.50474	6.42243	5.5946	5.77192	7.22979			10	Polyline15	6.62254		0	0			8	Polyline10	7.74503		0	0			15	Polyline16	18.8986		0	0			6	Polyline7	7.79888		0	0
		6.41219	8.96851	5.70544	8.78918	5.4522	5.36103	6.19971	5.69062	5.95802	6.50524	6.42302	5.60064	5.77197	7.23913			12	Polyline15	10.8818		0	0			8	Polyline11	9.67758		0	0			15	Polyline18	13.4331		0	0			6	Polyline8	8.21346		0	0
		6.42345	8.99186	5.71383	8.80589	5.456	5.36398	6.21252	5.70495	5.96307	6.51736	6.42562	5.60112	5.77528	7.30142			15	Polyline15	6.52616		0	0			8	Polyline12	6.87752		0	0			15	Polyline19	10.8504		0	0			6	Polyline10	12.3907		0	0
		6.42698	9.01428	5.71911	8.8781	5.46382	5.37008	6.21832	5.70588	5.96534	6.51845	6.43479	5.60223	5.78122	7.30771			17	Polyline15	7.78658		0	0			8	Polyline13	8.1401		0	0			15	Polyline20	12.4919		0	0			6	Polyline11	29.1098		0	0
		6.42703	9.02011	5.72893	8.93123	5.475	5.37251	6.23633	5.70721	5.96679	6.51953	6.4351	5.6033	5.78469	7.32833			18	Polyline15	8.09885		0	0			8	Polyline14	7.58046		0	0			15	Polyline21	14.6022		0	0			6	Polyline12	16.4329		0	0
		6.44009	9.02151	5.73536	8.93663	5.47845	5.37299	6.24115	5.70748	5.96724	6.52584	6.43703	5.60723	5.78756	7.33345			19	Polyline15	6.62515		0	0			8	Polyline15	11.8263		0	0			15	Polyline22	10.3216		0	0			6	Polyline13	6.25442		0	0
		6.4464	9.02294	5.73751	8.98786	5.48008	5.37614	6.24243	5.70769	5.9783	6.53901	6.44127	5.60779	5.78857	7.36039			2	Polyline16	9.87527		0	0			8	Polyline16	9.09631		0	0			15	Polyline23	22.9675		0	0			6	Polyline14	8.77231		0	0
		6.44929	9.05633	5.74033	9.00409	5.48054	5.37876	6.25457	5.70859	5.97957	6.54298	6.44252	5.62277	5.7897	7.37948			4	Polyline16	8.57105		0	0			8	Line17	8.13773		0	0			15	Polyline24	7.43431		0	0			6	Line15	9.97215		0	0
		6.4578	9.07886	5.74199	9.03563	5.48101	5.38157	6.25569	5.71046	5.98619	6.54379	6.44512	5.62384	5.79037	7.38174			5	Polyline16	7.78287		0	0			8	Polyline18	6.39211		0	0			15	Polyline25	15.1743		0	0			6	Polyline16	8.12543		0	0
		6.45953	9.09181	5.74488	9.05732	5.48253	5.382	6.25924	5.71355	5.99834	6.54517	6.44516	5.62828	5.79364	7.38972			6	Polyline16	35.8821		0	0			8	Polyline19	8.15379		0	0			15	Polyline26	7.81891		0	0			6	Polyline17	6.68251		0	0
		6.46013	9.12874	5.74628	9.06622	5.48323	5.38293	6.2626	5.7157	6.0001	6.54675	6.44846	5.63012	5.79375	7.39986			10	Polyline16	6.69213		0	0			8	Polyline20	7.03685		0	0			15	Polyline27	17.2224		0	0			6	Line19	6.51201		0	0
		6.46124	9.1357	5.74711	9.07961	5.48462	5.3853	6.26888	5.72575	6.01292	6.56548	6.45065	5.63148	5.79996	7.40254			15	Polyline16	5.37417		0	0			8	Polyline21	9.29378		0	0			16	Polyline1	4.61773		0	0			6	Polyline20	9.63507		0	0
		6.46154	9.14023	5.75278	9.13453	5.48809	5.39539	6.28182	5.73004	6.01392	6.57185	6.45522	5.63278	5.80042	7.42123			18	Polyline16	14.5596		0	0			8	Polyline22	9.84466		0	0			16	Polyline2	12.8161		0	0			6	Polyline21	6.01795		0	0
		6.465	9.14673	5.75576	9.15179	5.48894	5.39717	6.28263	5.7318	6.0152	6.57457	6.46098	5.63373	5.80627	7.43403			20	Polyline16	6.00076		0	0			8	Polyline24	10.0369		0	0			16	Polyline3	9.7404		0	0			6	Polyline23	9.84498		0	0
		6.46608	9.1977	5.75629	9.1681	5.49383	5.3982	6.28404	5.733	6.01691	6.5825	6.46103	5.63905	5.80773	7.45099			3	Polyline17	7.2881		0	0			8	Polyline25	9.15629		0	0			16	Polyline4	7.79053		0	0			6	Polyline24	10.9392		0	0
		6.48447	9.2099	5.75847	9.17509	5.4994	5.4061	6.28571	5.73638	6.0212	6.58789	6.47509	5.64663	5.80857	7.49474			4	Polyline17	12.9625		0	0			9	Line1	6.27309		0	0			16	Polyline5	19.1885		0	0			7	Polyline1	8.77224		0	0
		6.48867	9.21667	5.75933	9.19603	5.50038	5.40703	6.30123	5.73648	6.02349	6.59024	6.47627	5.65883	5.81155	7.49703			5	Polyline17	14.0935		0	0			9	Polyline2	9.38874		0	0			16	Polyline6	11.8441		0	0			7	Polyline2	7.96834		0	0
		6.49001	9.21774	5.76028	9.20144	5.50339	5.40913	6.30357	5.73787	6.02475	6.59135	6.47785	5.6651	5.81993	7.50828			10	Polyline17	11.551		0	0			9	Polyline3	6.78773		0	0			16	Polyline7	16.0707		0	0			7	Polyline3	9.64144		0	0
		6.4905	9.23599	5.76103	9.26298	5.50417	5.41644	6.30431	5.74306	6.0278	6.60334	6.5032	5.66746	5.82209	7.50832			15	Polyline17	5.38404		0	0			9	Polyline4	9.5089		0	0			16	Polyline8	14.5637		0	0			7	Polyline5	10.354		0	0
		6.49956	9.26603	5.77204	9.26711	5.51684	5.41713	6.3044	5.7434	6.02927	6.609	6.51047	5.66843	5.8247	7.51204			18	Polyline17	23.5523		0	0			9	Polyline5	7.61372		0	0			16	Polyline9	9.34211		0	0			7	Polyline6	9.62677		0	0
		6.50497	9.26857	5.77731	9.27404	5.51793	5.42103	6.3187	5.7449	6.02947	6.61037	6.51257	5.66984	5.82608	7.51905			19	Polyline17	10.4641		0	0			9	Polyline6	10.2876		0	0			16	Polyline10	9.12143		0	0			7	Polyline7	7.43785		0	0
		6.50653	9.27489	5.77991	9.28736	5.51878	5.42366	6.3282	5.7451	6.03714	6.61491	6.51526	5.67368	5.82798	7.52181			20	Polyline17	10.9753		0	0			9	Polyline7	8.36574		0	0			16	Polyline11	6.1972		0	0			7	Polyline8	9.96702		0	0
		6.51096	9.27591	5.78033	9.3077	5.52501	5.42906	6.33955	5.74572	6.03905	6.62336	6.51833	5.68175	5.82799	7.52469			3	Polyline18	11.1117		0	0			9	Polyline8	10.4416		0	0			16	Polyline12	9.88208		0	0			7	Polyline9	7.60178		0	0
		6.51199	9.28284	5.78209	9.31594	5.52574	5.42996	6.33968	5.74835	6.05725	6.62495	6.52814	5.68501	5.82811	7.53092			4	Polyline18	21.7853		0	0			9	Line9	5.16126		0	0			16	Polyline13	6.46245		0	0			7	Polyline10	9.55227		0	0
		6.52347	9.28798	5.78556	9.33768	5.53306	5.4319	6.3401	5.74883	6.06401	6.62706	6.53131	5.68757	5.83136	7.54606			5	Polyline18	6.59286		0	0			9	Polyline10	10.148		0	0			16	Polyline14	21.0345		0	0			7	Polyline11	11.0124		0	0
		6.52489	9.31772	5.78899	9.36918	5.54085	5.4325	6.35059	5.75097	6.06526	6.62742	6.53357	5.68795	5.83179	7.57497			10	Polyline18	10.2175		0	0			9	Polyline11	10.1951		0	0			16	Polyline15	10.2107		0	0			7	Polyline13	9.21862		0	0
		6.52757	9.32029	5.79548	9.38308	5.54706	5.43288	6.36085	5.75403	6.06957	6.63733	6.53556	5.68826	5.83199	7.58653			15	Polyline18	8.5297		0	0			9	Line12	5.73328		0	0			16	Polyline16	25.0552		0	0			7	Polyline14	10.7658		0	0
		6.55649	9.34087	5.79688	9.39205	5.54812	5.43516	6.38193	5.75426	6.07072	6.64089	6.53642	5.68828	5.83238	7.62028			18	Polyline18	12.1739		0	0			9	Line13	5.54294		0	0			16	Polyline17	15.2841		0	0			7	Polyline15	8.24013		0	0
		6.56202	9.3453	5.80154	9.41737	5.55182	5.43559	6.38635	5.75473	6.07381	6.6495	6.53822	5.68854	5.83436	7.63545			19	Polyline18	7.1511		0	0			9	Polyline14	5.88089		0	0			16	Polyline18	11.5604		0	0			7	Polyline16	7.58094		0	0
		6.56446	9.38189	5.80241	9.46322	5.55316	5.43627	6.38684	5.75512	6.07491	6.65534	6.53864	5.69097	5.83443	7.63818			20	Polyline18	8.14212		0	0			9	Polyline15	6.22006		0	0			16	Polyline19	10.395		0	0			7	Polyline17	11.0527		0	0
		6.5668	9.39389	5.80269	9.46378	5.55418	5.43874	6.39121	5.76219	6.07508	6.66297	6.54389	5.6912	5.83961	7.66833			3	Polyline19	23.9764		0	0			9	Line16	6.05373		0	0			16	Polyline20	9.80831		0	0			7	Polyline18	11.3713		0	0
		6.56888	9.41883	5.80409	9.52235	5.55646	5.45646	6.39491	5.76453	6.0773	6.66341	6.5445	5.69188	5.83969	7.67747			4	Polyline19	10.0465		0	0			9	Polyline17	10.1478		0	0			16	Line21	4.31406		0	0			7	Polyline19	9.26807		0	0
		6.57011	9.4212	5.80772	9.53915	5.56037	5.47137	6.39688	5.76889	6.0805	6.66512	6.55428	5.69564	5.84175	7.69359			5	Polyline19	7.65049		0	0			9	Polyline18	7.45984		0	0			16	Polyline23	8.19928		0	0			7	Polyline20	9.2934		0	0
		6.57598	9.43213	5.81226	9.54201	5.56174	5.47328	6.40229	5.78431	6.0827	6.67276	6.55986	5.69722	5.84621	7.6955			10	Polyline19	9.16099		0	0			10	Polyline1	7.40117		0	0			16	Polyline24	19.1132		0	0			7	Polyline21	6.9238		0	0
		6.58145	9.43523	5.81432	9.54667	5.56174	5.475	6.41655	5.78982	6.08633	6.67418	6.58006	5.70509	5.84916	7.70235			18	Polyline19	9.1992		0	0			10	Polyline2	6.29266		0	0			16	Polyline25	9.68264		0	0			7	Polyline22	12.362		0	0
		6.59392	9.43654	5.81468	9.56899	5.56543	5.47711	6.4179	5.79643	6.08663	6.67495	6.58114	5.70629	5.85114	7.70905			19	Polyline19	11.4923		0	0			10	Polyline3	7.59433		0	0			16	Polyline26	9.90805		0	0			7	Polyline23	8.84823		0	0
		6.59455	9.45186	5.82025	9.57856	5.56794	5.47944	6.41867	5.79857	6.08714	6.68014	6.58193	5.70638	5.8533	7.7275			20	Polyline19	11.1346		0	0			10	Polyline5	7.59417		0	0			16	Polyline27	16.2102		0	0			7	Polyline24	11.8105		0	0
		6.60519	9.46007	5.82122	9.584	5.57642	5.48102	6.4229	5.79883	6.08918	6.68333	6.58323	5.70713	5.85793	7.74265			2	Polyline2	6.89721		0	0			10	Polyline6	9.79482		0	0			16	Polyline28	10.0651		0	0			7	Polyline25	9.27303		0	0
		6.61168	9.48184	5.82292	9.59368	5.57845	5.48178	6.42476	5.81004	6.09832	6.68699	6.58414	5.71008	5.86111	7.77135			3	Polyline2	3.99141		0	0			10	Polyline7	7.9742		0	0			16	Polyline29	8.07749		0	0			7	Polyline26	10.4693		0	0
		6.61224	9.52137	5.8302	9.64537	5.58075	5.4819	6.42964	5.81361	6.10184	6.68921	6.58415	5.71483	5.86142	7.77678			4	Polyline2	8.32652		0	0			10	Polyline8	9.07585		0	0			16	Polyline30	7.24409		0	0			7	Polyline28	10.9536		0	0
		6.62777	9.52687	5.83349	9.66493	5.58348	5.48369	6.43261	5.81627	6.12221	6.69926	6.59458	5.71655	5.86173	7.79044			5	Polyline2	12.0492		0	0			10	Polyline9	8.98195		0	0			16	Polyline31	13.0761		0	0			7	Polyline29	10.2939		0	0
		6.63673	9.5291	5.83414	9.71789	5.58819	5.48421	6.45412	5.81787	6.12342	6.71134	6.59508	5.7264	5.86224	7.79345			6	Polyline2	10.4677		0	0			10	Polyline10	7.89112		0	0			16	Line32	10.9424		0	0			7	Polyline30	9.15023		0	0
		6.63788	9.53398	5.83722	9.73647	5.5997	5.48471	6.46103	5.8246	6.12391	6.71818	6.59753	5.72674	5.86392	7.79698			9	Polyline2	8.42271		0	0			10	Polyline11	7.09952		0	0			16	Polyline33	19.5206		0	0			7	Polyline31	8.03561		0	0
		6.64545	9.58575	5.83854	9.75256	5.60158	5.48658	6.466	5.82716	6.1285	6.7191	6.60396	5.73535	5.86456	7.81314			10	Polyline2	7.81608		0	0			10	Polyline12	7.15433		0	0			16	Polyline34	16.2591		0	0			8	Polyline1	14.032		0	0
		6.66644	9.59609	5.84262	9.75668	5.60277	5.48669	6.4695	5.84075	6.13954	6.72324	6.6044	5.73986	5.86459	7.81742			11	Polyline2	5.11791		0	0			10	Line13	7.56461		0	0			16	Polyline35	9.77643		0	0			8	Polyline2	10.7813		0	0
		6.6683	9.60469	5.84347	9.75968	5.60565	5.48984	6.47604	5.84092	6.1408	6.72719	6.61218	5.74079	5.86847	7.82587			12	Polyline2	9.18359		0	0			10	Polyline14	7.5468		0	0			16	Polyline36	8.23622		0	0			8	Polyline3	7.9703		0	0
		6.67536	9.63445	5.84349	9.76702	5.60619	5.49372	6.47755	5.84154	6.14174	6.72727	6.61501	5.74282	5.86864	7.83277			13	Polyline2	7.53443		0	0			10	Polyline15	8.60805		0	0			16	Line37	1.52161		0	0			8	Polyline4	6.56272		0	0
		6.67817	9.63622	5.84496	9.80978	5.60824	5.49481	6.47799	5.84309	6.14676	6.73154	6.61796	5.74501	5.87265	7.85638			15	Polyline2	8.8555		0	0			10	Line16	6.29192		0	0			16	Polyline38	8.85397		0	0			8	Polyline6	7.63591		0	0
		6.69855	9.65488	5.84926	9.84711	5.6092	5.49635	6.48372	5.85067	6.14837	6.73404	6.62486	5.74726	5.87716	7.85794			18	Polyline2	9.51626		0	0			11	Polyline1	6.8789		0	0			16	Polyline39	10.3344		0	0			8	Polyline7	22.3034		0	0
		6.70163	9.65541	5.85275	9.85576	5.61014	5.49691	6.48717	5.85129	6.15268	6.73498	6.63102	5.75065	5.87732	7.87768			19	Polyline2	10.1288		0	0			11	Polyline2	8.85752		0	0			16	Polyline40	13.0179		0	0			8	Polyline8	7.94348		0	0
		6.71265	9.66463	5.85806	9.85663	5.61201	5.49858	6.48943	5.85985	6.15372	6.73812	6.63126	5.75254	5.88147	7.88119			20	Polyline2	11.064		0	0			11	Polyline3	5.99054		0	0			16	Polyline41	7.35499		0	0			8	Polyline9	10.9649		0	0
		6.71302	9.66576	5.85867	9.86582	5.61216	5.49904	6.49147	5.86035	6.15741	6.74019	6.6339	5.75506	5.88317	7.88254			15	Polyline20	8.19563		0	0			11	Line4	8.35067		0	0			16	Polyline42	9.56547		0	0			8	Polyline10	6.77974		0	0
		6.71719	9.68028	5.86351	9.87349	5.61385	5.50063	6.50646	5.86269	6.16079	6.74564	6.63919	5.75636	5.88674	7.89323			18	Polyline20	7.10448		0	0			11	Polyline5	8.48859		0	0			16	Polyline43	13.9311		0	0			8	Polyline11	8.02154		0	0
		6.72571	9.70229	5.86783	9.89461	5.61408	5.50597	6.50711	5.86367	6.16284	6.74982	6.64342	5.75971	5.88802	7.91333			19	Polyline20	9.55256		0	0			11	Polyline6	8.14562		0	0			16	Polyline44	11.6845		0	0			8	Polyline12	5.80947		0	0
		6.72644	9.70526	5.87662	9.9067	5.61814	5.50753	6.50872	5.86403	6.16433	6.75303	6.64514	5.76507	5.89123	7.91636			4	Polyline21	21.0705		0	0			11	Polyline7	7.16082		0	0			17	Polyline1	13.6605		0	0			8	Polyline13	18.6122		0	0
		6.7275	9.74243	5.8791	9.92777	5.62058	5.51263	6.51429	5.86482	6.16603	6.75496	6.65986	5.76626	5.89176	7.92668			10	Polyline21	9.33386		0	0			11	Polyline8	6.17733		0	0			17	Polyline2	9.90127		0	0			8	Polyline14	8.06431		0	0
		6.73832	9.74298	5.88078	9.95186	5.62395	5.51285	6.51836	5.86839	6.17313	6.77524	6.66084	5.76827	5.90066	7.97583			15	Polyline21	8.33944		0	0			11	Polyline9	6.30302		0	0			17	Polyline3	9.23284		0	0			8	Polyline15	7.94855		0	0
		6.74872	9.74673	5.88454	9.9662	5.62677	5.51466	6.52088	5.87185	6.19143	6.77694	6.66299	5.77301	5.9041	7.97784			18	Polyline21	8.31843		0	0			11	Line10	6.7781		0	0			17	Polyline4	13.6982		0	0			8	Polyline16	7.25137		0	0
		6.74924	9.75416	5.89162	9.97156	5.63168	5.51486	6.53821	5.87437	6.19379	6.78109	6.67462	5.77415	5.90495	7.98694			19	Polyline21	8.74715		0	0			11	Line11	6.16507		0	0			17	Polyline5	16.8625		0	0			8	Polyline17	11.3974		0	0
		6.75024	9.76616	5.89191	9.98271	5.63519	5.51543	6.54351	5.87585	6.1943	6.7869	6.68364	5.77854	5.90647	7.99411			20	Polyline21	9.6527		0	0			11	Polyline12	9.42669		0	0			17	Polyline6	31.1079		0	0			8	Polyline19	7.97954		0	0
		6.75332	9.77869	5.89317	9.98381	5.63695	5.5172	6.54918	5.87685	6.1996	6.79066	6.68462	5.77986	5.90929	8.00952			4	Polyline22	8.6026		0	0			11	Line13	8.31619		0	0			17	Polyline7	10.8253		0	0			9	Polyline1	7.79296		0	0
		6.77789	9.7818	5.89881	9.99847	5.63992	5.51955	6.54994	5.88276	6.20187	6.79292	6.68471	5.78621	5.91058	8.02896			10	Polyline22	7.83825		0	0			11	Polyline14	6.865		0	0			17	Polyline8	17.006		0	0			9	Polyline3	6.41845		0	0
		6.77949	9.78559	5.90302	10.0013	5.64649	5.52029	6.56172	5.88361	6.20231	6.79344	6.6858	5.78843	5.91202	8.04012			15	Polyline22	7.69601		0	0			11	Polyline15	6.82224		0	0			17	Polyline9	13.5022		0	0			9	Polyline4	12.0191		0	0
		6.78204	9.79471	5.9039	10.0134	5.65174	5.52276	6.57522	5.88658	6.21171	6.79352	6.69158	5.79179	5.91314	8.05116			18	Polyline22	11.617		0	0			11	Polyline16	6.01352		0	0			17	Polyline10	26.0548		0	0			9	Polyline5	13.8725		0	0
		6.78521	9.82534	5.90481	10.0193	5.65691	5.52332	6.58182	5.8888	6.21363	6.79352	6.69815	5.79531	5.91564	8.0744			19	Polyline22	9.69397		0	0			11	Polyline17	7.03852		0	0			17	Polyline11	15.2809		0	0			9	Polyline6	8.19473		0	0
		6.78588	9.82832	5.90967	10.0321	5.66079	5.52497	6.58672	5.88953	6.21617	6.79711	6.70545	5.79878	5.91869	8.07442			20	Polyline22	30.8185		0	0			11	Polyline18	8.87643		0	0			17	Polyline12	21.9792		0	0			9	Polyline7	9.13978		0	0
		6.78858	9.8607	5.9105	10.0685	5.66154	5.52499	6.5985	5.8911	6.21668	6.8083	6.71427	5.79957	5.92813	8.08456			4	Polyline23	8.54066		0	0			12	Polyline1	6.1496		0	0			17	Polyline13	9.62778		0	0			9	Polyline8	6.15807		0	0
		6.79933	9.87074	5.91442	10.0853	5.66909	5.52786	6.6151	5.89281	6.2197	6.82547	6.71501	5.80287	5.93012	8.09567			10	Polyline23	5.61906		0	0			12	Polyline2	8.54826		0	0			17	Polyline14	7.3214		0	0			9	Polyline9	10.72		0	0
		6.80228	9.89102	5.91817	10.1003	5.67001	5.52858	6.64814	5.90018	6.22146	6.83093	6.71716	5.80493	5.93048	8.10239			18	Polyline23	10.3739		0	0			12	Polyline3	7.42435		0	0			17	Polyline15	9.04364		0	0			9	Polyline10	6.76502		0	0
		6.81621	9.90375	5.91853	10.1087	5.67265	5.53188	6.65159	5.90342	6.22362	6.83314	6.71933	5.80533	5.93605	8.10574			19	Polyline23	4.92607		0	0			12	Polyline4	8.89823		0	0			17	Polyline16	13.3208		0	0			9	Polyline11	12.6142		0	0
		6.83524	9.92492	5.92645	10.2143	5.67427	5.53507	6.65187	5.90379	6.23487	6.83443	6.72258	5.8081	5.94047	8.1136			4	Polyline24	16.2902		0	0			12	Polyline5	10.4172		0	0			17	Line17	7.78753		0	0			9	Polyline12	7.03644		0	0
		6.84186	10.0191	5.93486	10.2259	5.68055	5.53796	6.66282	5.90651	6.23801	6.83979	6.7241	5.81205	5.94261	8.12026			10	Polyline24	6.56969		0	0			12	Polyline7	8.88442		0	0			17	Polyline18	22.9349		0	0			9	Polyline13	9.94244		0	0
		6.84458	10.0266	5.94189	10.2434	5.68454	5.54295	6.66565	5.90898	6.24264	6.84326	6.7294	5.82002	5.94512	8.1341			10	Polyline25	7.35676		0	0			12	Polyline8	9.76803		0	0			17	Polyline19	9.75602		0	0			9	Polyline14	10.6415		0	0
		6.84874	10.0268	5.94205	10.2898	5.68553	5.5453	6.67656	5.91872	6.25209	6.84558	6.73039	5.82105	5.94521	8.15535			15	Polyline25	17.3203		0	0			12	Polyline9	7.95016		0	0			17	Polyline20	6.27745		0	0			9	Polyline15	10.9563		0	0
		6.84953	10.0281	5.9421	10.3277	5.68599	5.54874	6.67983	5.92126	6.25601	6.84662	6.73117	5.82165	5.9476	8.17717			10	Polyline27	6.38126		0	0			12	Polyline11	9.08151		0	0			17	Polyline21	22.9571		0	0			9	Polyline16	7.02096		0	0
		6.8541	10.0307	5.94341	10.3277	5.68601	5.54922	6.69173	5.9267	6.26286	6.84865	6.73121	5.82355	5.94794	8.19278			10	Polyline28	6.60978		0	0			12	Polyline12	7.804		0	0			17	Polyline22	6.9404		0	0			9	Polyline17	4.8092		0	0
		6.86246	10.0548	5.94811	10.3681	5.68677	5.54971	6.70368	5.93586	6.26312	6.86393	6.73246	5.83115	5.94821	8.21055			10	Polyline29	17.0048		0	0			12	Polyline13	8.02943		0	0			17	Polyline23	11.9993		0	0			9	Polyline18	9.27389		0	0
		6.8672	10.1314	5.95718	10.3755	5.68982	5.55122	6.70993	5.93627	6.26797	6.86859	6.73881	5.8314	5.95461	8.22846			1	Polyline3	8.11827		0	0			12	Polyline16	10.4106		0	0			17	Polyline24	12.3167		0	0			9	Polyline19	13.5344		0	0
		6.87722	10.1519	5.96448	10.3888	5.69446	5.55303	6.71223	5.93809	6.2683	6.87082	6.74619	5.84244	5.95752	8.25461			3	Polyline3	9.15787		0	0			12	Polyline17	6.77063		0	0			17	Polyline25	21.4982		0	0			9	Polyline20	9.81811		0	0
		6.87804	10.1686	5.96796	10.4352	5.69551	5.55342	6.72009	5.9408	6.27033	6.87202	6.75027	5.8425	5.95759	8.25529			4	Polyline3	17.9552		0	0			12	Polyline18	7.11854		0	0			17	Polyline26	19.1937		0	0			9	Polyline21	8.41044		0	0
		6.88572	10.1687	5.97244	10.4404	5.7005	5.55358	6.72032	5.94147	6.27092	6.87723	6.75513	5.84859	5.96269	8.25853			5	Polyline3	8.57338		0	0			12	Polyline19	6.4382		0	0			17	Polyline27	6.39722		0	0			9	Polyline22	20.1202		0	0
		6.88593	10.1689	5.97977	10.4541	5.70076	5.55433	6.72884	5.94555	6.27502	6.87767	6.76445	5.85233	5.96526	8.28406			6	Polyline3	5.67028		0	0			12	Polyline20	6.8262		0	0			17	Polyline28	11.1576		0	0			9	Line23	9.19354		0	0
		6.90195	10.2021	5.98231	10.4965	5.70086	5.55562	6.73057	5.94945	6.28548	6.879	6.76979	5.85626	5.9659	8.3008			9	Polyline3	17.6708		0	0			12	Polyline21	9.53093		0	0			17	Polyline29	7.45123		0	0			9	Line24	9.22954		0	0
		6.90352	10.2087	5.99284	10.4987	5.70224	5.5559	6.73735	5.95295	6.2876	6.88191	6.77946	5.85864	5.96841	8.3141			10	Polyline3	7.95688		0	0			12	Polyline22	9.79997		0	0			17	Polyline30	8.82792		0	0			9	Polyline25	6.16178		0	0
		6.90959	10.2101	5.99316	10.5176	5.70375	5.55679	6.75248	5.95676	6.28761	6.8877	6.78034	5.86036	5.97857	8.36366			12	Polyline3	11.3692		0	0			12	Polyline23	8.20559		0	0			17	Polyline31	6.5236		0	0			9	Polyline27	7.41072		0	0
		6.91339	10.2333	5.99565	10.521	5.70572	5.55722	6.75317	5.95888	6.2882	6.89521	6.78124	5.86605	5.98124	8.37122			14	Polyline3	7.00285		0	0			12	Line25	7.42168		0	0			17	Polyline32	8.08469		0	0			9	Polyline28	6.63374		0	0
		6.91459	10.2395	5.99708	10.5257	5.72263	5.56297	6.75832	5.9595	6.29181	6.90146	6.78496	5.86609	5.98884	8.39189			16	Polyline3	9.27345		0	0			12	Polyline26	8.6688		0	0			17	Line34	8.06655		0	0			9	Polyline29	7.3992		0	0
		6.91922	10.2616	5.99801	10.5751	5.72548	5.56922	6.76412	5.9613	6.29184	6.90974	6.78674	5.86657	5.98972	8.42589			17	Polyline3	16.95		0	0			12	Polyline28	7.57052		0	0			17	Polyline35	15.1377		0	0			10	Line1	8.14448		0	0
		6.92894	10.2749	6.00548	10.5945	5.73327	5.57041	6.76499	5.9639	6.29364	6.90982	6.78739	5.86914	5.99169	8.43546			18	Polyline3	29.7587		0	0			12	Line29	7.15384		0	0			17	Polyline36	9.86309		0	0			10	Polyline2	9.00398		0	0
		6.9294	10.2837	6.00587	10.6158	5.73839	5.57072	6.76885	5.96423	6.29369	6.91037	6.78994	5.87152	5.99698	8.45925			19	Polyline3	6.8092		0	0			12	Line30	7.15886		0	0			17	Polyline37	13.5924		0	0			10	Polyline3	8.46864		0	0
		6.9298	10.3863	6.00969	10.6262	5.73854	5.57509	6.77868	5.96482	6.29379	6.91518	6.79012	5.87515	6.00868	8.46734			20	Polyline3	8.74428		0	0			12	Line31	6.09199		0	0			17	Polyline38	16.3191		0	0			10	Polyline4	6.72379		0	0
		6.93638	10.393	6.01029	10.6393	5.73918	5.58031	6.77884	5.96932	6.31713	6.92214	6.79184	5.87537	6.0099	8.47942			10	Polyline31	7.29578		0	0			12	Polyline32	8.13973		0	0			17	Polyline39	9.2834		0	0			10	Polyline5	8.27556		0	0
		6.93703	10.4347	6.01123	10.6511	5.73921	5.58275	6.77997	5.97199	6.32378	6.92695	6.79516	5.88042	6.01092	8.50826			10	Polyline32	9.562		0	0			12	Polyline33	6.34863		0	0			17	Polyline40	11.1086		0	0			10	Polyline6	6.95053		0	0
		6.93773	10.4457	6.01989	10.7099	5.74221	5.58305	6.78288	5.98869	6.32916	6.9433	6.79856	5.8856	6.01359	8.53925			10	Polyline36	9.40583		0	0			12	Polyline34	6.60067		0	0			17	Polyline41	9.34275		0	0			10	Polyline7	6.73666		0	0
		6.94255	10.4511	6.02184	10.7368	5.74397	5.58749	6.78608	5.99564	6.33032	6.95106	6.80171	5.88742	6.01436	8.54526			1	Polyline4	11.34		0	0			12	Line36	11.4783		0	0			17	Polyline42	13.9008		0	0			10	Polyline8	7.90594		0	0
		6.94281	10.5451	6.02444	10.7628	5.74414	5.58982	6.78963	6.0099	6.33206	6.95492	6.80215	5.89123	6.01442	8.57425			2	Polyline4	7.7624		0	0			12	Polyline37	9.78231		0	0			17	Polyline44	6.44395		0	0			10	Line9	8.53507		0	0
		6.94478	10.5526	6.02583	10.7747	5.74423	5.5919	6.79097	6.01077	6.33595	6.95835	6.8106	5.89874	6.01737	8.58055			3	Polyline4	16.8012		0	0			12	Polyline38	8.81716		0	0			17	Polyline45	6.76053		0	0			10	Polyline10	9.26623		0	0
		6.95055	10.5556	6.0333	10.7757	5.74667	5.59813	6.79174	6.03094	6.34232	6.96537	6.81186	5.90504	6.0174	8.59801			4	Polyline4	11.8		0	0			13	Polyline1	8.95396		0	0			18	Line1	1.75981		0	0			10	Polyline11	7.49682		0	0
		6.956	10.6321	6.03945	10.7841	5.75527	5.60035	6.79761	6.05322	6.34253	6.97081	6.8173	5.90519	6.02408	8.63394			5	Polyline4	7.34968		0	0			13	Polyline2	7.8552		0	0			18	Polyline2	13.2431		0	0			10	Polyline12	7.25686		0	0
		6.96662	10.6397	6.04309	10.807	5.76132	5.6078	6.80835	6.05598	6.35079	6.97549	6.81962	5.91695	6.02454	8.64723			6	Polyline4	24.7102		0	0			13	Polyline3	6.28473		0	0			18	Polyline3	19.4223		0	0			10	Polyline13	8.81534		0	0
		6.96805	10.678	6.05293	10.8085	5.76262	5.60909	6.81421	6.05693	6.35302	6.98248	6.82337	5.92026	6.02754	8.65122			7	Polyline4	13.6588		0	0			13	Polyline4	7.53442		0	0			18	Polyline4	5.74462		0	0			10	Polyline14	8.27803		0	0
		6.97446	10.6781	6.05307	10.8292	5.7627	5.61271	6.8144	6.05751	6.35608	6.98593	6.82446	5.92137	6.02774	8.66588			10	Polyline4	10.0934		0	0			13	Polyline6	6.58616		0	0			18	Polyline5	7.99513		0	0			10	Polyline16	8.54431		0	0
		6.9809	10.6851	6.05853	10.8635	5.76326	5.61292	6.81934	6.0595	6.35712	6.98621	6.82499	5.9233	6.03524	8.67469			11	Polyline4	10.2883		0	0			13	Polyline7	7.63587		0	0			18	Polyline6	18.5007		0	0			10	Polyline17	10.8611		0	0
		6.98296	10.6909	6.06118	10.8723	5.76709	5.61834	6.82943	6.06188	6.35823	6.9909	6.82981	5.92971	6.0357	8.68481			12	Polyline4	4.84204		0	0			13	Polyline8	7.25095		0	0			18	Polyline7	17.2067		0	0			10	Polyline18	6.25629		0	0
		6.98337	10.6948	6.0625	10.8761	5.76716	5.61971	6.84486	6.06846	6.36647	6.99228	6.83822	5.93289	6.03964	8.69151			13	Polyline4	7.98895		0	0			13	Polyline9	7.00798		0	0			18	Polyline8	13.0649		0	0			10	Polyline19	9.78436		0	0
		6.98651	10.7021	6.06526	10.8817	5.76831	5.62131	6.85205	6.07025	6.37135	6.99362	6.84078	5.93586	6.04545	8.70654			14	Polyline4	11.438		0	0			13	Line10	6.35306		0	0			18	Polyline9	12.6278		0	0			10	Polyline20	12.5248		0	0
		6.98871	10.7054	6.06966	10.8911	5.77075	5.62172	6.87386	6.07054	6.37588	6.99599	6.8447	5.93788	6.0499	8.71732			15	Polyline4	7.63052		0	0			13	Polyline11	10.3901		0	0			18	Polyline10	18.3721		0	0			10	Line21	5.47121		0	0
		6.99924	10.7686	6.07036	10.8971	5.77113	5.62588	6.87555	6.07112	6.38599	6.99852	6.8457	5.94145	6.05185	8.72391			16	Polyline4	11.3324		0	0			13	Line12	8.59206		0	0			18	Polyline11	11.8714		0	0			10	Polyline22	7.72076		0	0
		7.00853	10.7999	6.07703	10.9049	5.7743	5.62618	6.89053	6.07421	6.38857	7.00796	6.84745	5.9422	6.05494	8.73308			19	Polyline4	5.57746		0	0			13	Polyline13	5.63586		0	0			18	Polyline12	19.886		0	0			10	Line23	8.02638		0	0
		7.01648	10.8074	6.07735	10.9098	5.77592	5.62942	6.90377	6.07788	6.39113	7.00806	6.85139	5.94238	6.05768	8.7368			20	Polyline4	13.9884		0	0			13	Polyline14	6.37813		0	0			18	Polyline13	9.22673		0	0			10	Polyline24	6.54337		0	0
		7.02041	10.8182	6.08152	10.9236	5.77616	5.63054	6.90824	6.07997	6.3964	7.0121	6.85463	5.94268	6.06748	8.74578			1	Polyline5	9.83037		0	0			13	Polyline15	8.53775		0	0			18	Line14	7.8327		0	0			10	Polyline25	8.13685		0	0
		7.02273	10.8285	6.08399	10.9289	5.77631	5.63453	6.91265	6.08047	6.40065	7.03535	6.8641	5.94419	6.06821	8.75614			2	Polyline5	9.55436		0	0			13	Polyline16	7.33267		0	0			18	Polyline15	11.1155		0	0			10	Polyline26	8.28941		0	0
		7.02435	10.8382	6.08629	10.9548	5.77656	5.63658	6.91424	6.08182	6.40086	7.0426	6.86422	5.94442	6.07289	8.75889			3	Polyline5	6.61936		0	0			13	Polyline17	8.52393		0	0			18	Polyline16	18.9743		0	0			10	Polyline28	7.94089		0	0
		7.04845	10.8534	6.08657	10.9611	5.77944	5.63979	6.91783	6.08669	6.40299	7.04997	6.86434	5.94668	6.07847	8.81066			4	Polyline5	8.24067		0	0			13	Polyline18	7.13964		0	0			18	Polyline17	22.7826		0	0			10	Line29	6.24305		0	0
		7.05285	10.8776	6.08857	10.984	5.78345	5.64045	6.92139	6.09128	6.40312	7.05342	6.86467	5.94676	6.08081	8.82459			5	Polyline5	39.0485		0	0			13	Polyline19	10.2603		0	0			18	Line18	6.28386		0	0			10	Polyline30	7.56198		0	0
		7.05436	10.89	6.08939	11.0098	5.78967	5.64129	6.9429	6.09293	6.40398	7.05694	6.86609	5.94707	6.08489	8.8889			6	Polyline5	9.13157		0	0			13	Polyline20	9.93021		0	0			19	Line1	2.21		0	0			10	Polyline31	7.01616		0	0
		7.05672	10.8901	6.09068	11.0202	5.78977	5.64528	6.94992	6.09313	6.40447	7.06784	6.86752	5.94833	6.086	8.94165			9	Polyline5	5.73243		0	0			13	Polyline21	7.97179		0	0			19	Polyline2	8.86212		0	0			10	Polyline32	11.2008		0	0
		7.06401	10.8963	6.09323	11.0424	5.79306	5.64798	6.95326	6.09534	6.40604	7.07666	6.86863	5.95156	6.08698	8.98828			10	Polyline5	5.02096		0	0			13	Polyline23	8.36162		0	0			19	Polyline3	12.9869		0	0			10	Polyline33	7.78907		0	0
		7.0791	10.9054	6.0965	11.0723	5.79872	5.64887	6.9554	6.09548	6.40934	7.07707	6.87074	5.95257	6.09016	8.997			11	Polyline5	8.76347		0	0			13	Polyline24	7.4713		0	0			19	Polyline4	10.1213		0	0			10	Polyline34	7.80385		0	0
		7.09008	10.9287	6.1003	11.0755	5.80606	5.65475	6.9675	6.09568	6.41177	7.08086	6.8751	5.95576	6.09098	9.00514			13	Polyline5	6.00633		0	0			13	Polyline25	7.52829		0	0			19	Line5	7.59499		0	0			10	Polyline35	11.792		0	0
		7.09611	10.941	6.1151	11.0914	5.8129	5.65621	6.96892	6.09667	6.42039	7.09324	6.8783	5.95639	6.09194	9.06145			14	Polyline5	8.03954		0	0			13	Polyline26	10.4101		0	0			19	Polyline6	6.99048		0	0			10	Polyline36	11.5481		0	0
		7.09881	10.9411	6.11535	11.2089	5.8129	5.65919	6.97394	6.10317	6.42396	7.09894	6.88158	5.95933	6.09655	9.0686			15	Polyline5	14.314		0	0			13	Polyline27	8.23223		0	0			19	Polyline7	8.4253		0	0			10	Polyline37	10.509		0	0
		7.11429	11.0184	6.11847	11.2681	5.81353	5.65986	6.97593	6.1134	6.43027	7.0993	6.8847	5.96313	6.09764	9.06949			16	Polyline5	5.0659		0	0			13	Polyline28	7.32758		0	0			19	Polyline8	8.78301		0	0			11	Line1	6.825		0	0
		7.11459	11.0321	6.13152	11.2707	5.81487	5.66795	6.97684	6.11694	6.43103	7.09993	6.89476	5.96479	6.10528	9.0734			17	Polyline5	6.90527		0	0			13	Polyline29	9.07434		0	0			19	Polyline9	6.86359		0	0			11	Polyline2	7.40489		0	0
		7.11511	11.108	6.13154	11.2907	5.819	5.67013	6.97774	6.11958	6.43384	7.10206	6.8952	5.96614	6.11275	9.08238			18	Polyline5	10.1834		0	0			14	Polyline1	11.2103		0	0			19	Polyline10	9.01897		0	0			11	Polyline3	7.50445		0	0
		7.14013	11.108	6.13758	11.313	5.8203	5.67156	6.98649	6.12012	6.43495	7.1122	6.89559	5.96659	6.11535	9.13419			1	Polyline6	12.4726		0	0			14	Polyline2	8.41452		0	0			19	Polyline11	12.2202		0	0			11	Polyline4	9.94876		0	0
		7.14453	11.1449	6.14114	11.3239	5.82173	5.67281	6.98881	6.12674	6.43724	7.11352	6.8968	5.96729	6.11662	9.13805			3	Polyline6	14.8042		0	0			14	Polyline3	8.45353		0	0			19	Polyline12	6.90381		0	0			11	Polyline5	7.54307		0	0
		7.14825	11.2468	6.1418	11.3268	5.82236	5.67552	6.99989	6.12699	6.44181	7.11729	6.90084	5.9701	6.11714	9.14114			5	Polyline6	11.8229		0	0			14	Polyline5	10.4585		0	0			19	Polyline13	5.58414		0	0			11	Polyline6	8.54272		0	0
		7.1548	11.2483	6.14412	11.3521	5.82301	5.67878	7.00766	6.12815	6.44274	7.1209	6.90172	5.97355	6.11751	9.17162			7	Polyline6	8.18583		0	0			14	Polyline6	15.6691		0	0			19	Polyline14	14.0788		0	0			11	Polyline7	7.27117		0	0
		7.1548	11.2728	6.14927	11.3571	5.82533	5.67935	7.00821	6.12892	6.44351	7.12418	6.90401	5.98989	6.12415	9.18442			8	Polyline6	9.14754		0	0			14	Polyline7	11.6349		0	0			19	Polyline15	17.3861		0	0			11	Polyline8	8.30213		0	0
		7.15625	11.3164	6.15327	11.363	5.82698	5.68096	7.01206	6.13166	6.44602	7.12593	6.90859	5.99165	6.12724	9.19712			10	Polyline6	6.97941		0	0			14	Polyline8	8.92028		0	0			19	Polyline16	30.7525		0	0			11	Polyline9	9.25263		0	0
		7.16074	11.3652	6.15561	11.37	5.83741	5.68135	7.01215	6.13237	6.44766	7.12606	6.909	6.0027	6.12737	9.19833			11	Polyline6	7.8176		0	0			14	Polyline9	6.96471		0	0			19	Line18	2.54249		0	0			11	Polyline10	10.4179		0	0
		7.17584	11.4071	6.1564	11.4233	5.83819	5.68155	7.01353	6.13361	6.44948	7.12923	6.91162	6.00289	6.12806	9.20652			12	Polyline6	10.2916		0	0			14	Line10	5.40126		0	0			19	Line19	2.23849		0	0			11	Polyline12	10.5384		0	0
		7.17888	11.4257	6.15893	11.4427	5.83969	5.68208	7.03122	6.13644	6.45549	7.13166	6.91322	6.0034	6.12892	9.22507			14	Polyline6	22.2143		0	0			14	Polyline11	8.74428		0	0			19	Polyline20	11.6995		0	0			11	Polyline13	10.4548		0	0
		7.1791	11.4424	6.16241	11.4513	5.83983	5.68574	7.03619	6.13889	6.45596	7.13359	6.9152	6.00373	6.14211	9.24754			15	Polyline6	14.0633		0	0			14	Polyline12	10.5153		0	0			19	Polyline21	7.21134		0	0			11	Polyline14	9.7349		0	0
		7.17933	11.4709	6.17075	11.4535	5.8409	5.68637	7.03681	6.14396	6.45851	7.13449	6.91605	6.00546	6.14416	9.25304			17	Polyline6	7.96994		0	0			14	Line13	8.86601		0	0			19	Line22	4.56159		0	0			11	Polyline15	8.43736		0	0
		7.18324	11.4733	6.17603	11.47	5.84145	5.68651	7.03769	6.14401	6.47168	7.16543	6.9167	6.00614	6.14654	9.25934			18	Polyline6	12.3033		0	0			14	Polyline14	7.20535		0	0			19	Polyline23	11.7102		0	0			11	Polyline16	9.79615		0	0
		7.18521	11.4755	6.18811	11.4885	5.84245	5.68775	7.04216	6.14426	6.4748	7.16821	6.9169	6.01013	6.14698	9.26661			19	Polyline6	9.63102		0	0			14	Line15	9.48933		0	0			19	Polyline24	11.3717		0	0			11	Polyline17	8.72341		0	0
		7.1858	11.4758	6.19481	11.6114	5.84668	5.68787	7.04316	6.14532	6.47597	7.17245	6.91875	6.0138	6.1485	9.27158			20	Polyline6	18.2014		0	0			14	Polyline16	7.05434		0	0			19	Polyline25	16.8852		0	0			11	Polyline18	8.13803		0	0
		7.18806	11.5046	6.19617	11.6442	5.84738	5.68933	7.04359	6.14888	6.48093	7.1797	6.91951	6.01605	6.15107	9.27292			1	Polyline7	10.8622		0	0			14	Line17	5.73328		0	0			19	Polyline26	7.28818		0	0			11	Polyline19	10.6739		0	0
		7.18894	11.6006	6.19698	11.6663	5.84756	5.69066	7.04934	6.14945	6.48541	7.18378	6.92179	6.01692	6.15109	9.27367			2	Polyline7	12.479		0	0			14	Polyline18	6.77672		0	0			19	Polyline27	7.60308		0	0			11	Polyline20	9.32828		0	0
		7.19029	11.659	6.20108	11.7544	5.85235	5.69276	7.05478	6.15171	6.48743	7.18909	6.92344	6.01976	6.15437	9.33286			3	Polyline7	7.55184		0	0			14	Line19	8.26114		0	0			19	Polyline28	18.3827		0	0			11	Polyline21	8.26644		0	0
		7.19276	11.6609	6.20342	11.7906	5.85529	5.69298	7.05584	6.15624	6.49623	7.19667	6.92575	6.0199	6.15628	9.34484			4	Polyline7	27.7224		0	0			14	Polyline21	10.1935		0	0			19	Line29	3.8482		0	0			11	Polyline24	7.79103		0	0
		7.20013	11.7615	6.20615	11.8042	5.85585	5.69492	7.05777	6.15638	6.49747	7.19696	6.92645	6.02114	6.15726	9.3469			7	Polyline7	7.82141		0	0			14	Polyline22	11.8485		0	0			19	Polyline30	8.4969		0	0			11	Polyline25	10.2994		0	0
		7.20057	11.7795	6.20672	11.8055	5.85902	5.69589	7.06576	6.16304	6.50824	7.1994	6.92708	6.02414	6.15857	9.36314			8	Polyline7	8.13092		0	0			14	Line23	6.66464		0	0			19	Polyline31	9.47037		0	0			12	Polyline1	6.78601		0	0
		7.20635	11.8063	6.20705	11.8231	5.86201	5.69683	7.07134	6.16843	6.51285	7.20158	6.93044	6.02742	6.16894	9.3775			10	Polyline7	5.54365		0	0			14	Polyline24	8.03543		0	0			19	Polyline32	10.6143		0	0			12	Polyline2	19.7498		0	0
		7.21116	11.8081	6.20737	11.8346	5.86281	5.69684	7.07423	6.16938	6.51666	7.209	6.93914	6.03725	6.17317	9.41323			11	Polyline7	5.52592		0	0			14	Polyline26	8.67721		0	0			19	Polyline33	25.7743		0	0			12	Polyline3	10.1459		0	0
		7.21288	11.8171	6.21359	11.8679	5.86634	5.69695	7.07465	6.17169	6.51976	7.22368	6.94179	6.03836	6.17587	9.41878			12	Polyline7	11.9026		0	0			14	Polyline27	10.1753		0	0			19	Polyline34	8.08899		0	0			12	Polyline4	6.34068		0	0
		7.22425	11.8675	6.21684	11.8723	5.86989	5.69787	7.0779	6.17549	6.52092	7.23573	6.95102	6.03925	6.17624	9.44838			13	Polyline7	10.348		0	0			14	Polyline28	9.49999		0	0			19	Polyline35	12.4008		0	0			12	Polyline6	6.97578		0	0
		7.22472	11.9143	6.21853	11.887	5.87069	5.7001	7.08744	6.18133	6.52502	7.24181	6.9619	6.05913	6.18103	9.46254			14	Polyline7	15.1189		0	0			14	Polyline29	9.8476		0	0			19	Polyline36	11.4809		0	0			12	Polyline7	9.47887		0	0
		7.23235	11.9179	6.21878	11.9035	5.87088	5.70034	7.09704	6.18212	6.52545	7.24244	6.96279	6.06405	6.18418	9.46471			16	Polyline7	9.55702		0	0			14	Line30	7.30896		0	0			19	Polyline37	17.519		0	0			12	Polyline8	11.7108		0	0
		7.23644	11.9291	6.22584	11.9173	5.87311	5.70138	7.10256	6.18548	6.5271	7.24535	6.97508	6.06847	6.18424	9.47503			17	Polyline7	10.2066		0	0			14	Polyline31	6.38134		0	0			19	Polyline38	8.94014		0	0			12	Line9	1.56271		0	0
		7.24994	11.9457	6.22791	11.918	5.87415	5.70415	7.10316	6.18732	6.52776	7.24647	6.97515	6.07168	6.18545	9.53622			19	Polyline7	8.52875		0	0			14	Polyline32	10.9458		0	0			19	Polyline39	19.7578		0	0			12	Polyline10	10.4096		0	0
		7.25215	11.9668	6.23607	11.9235	5.8746	5.70726	7.11194	6.19344	6.52792	7.24757	6.9756	6.07231	6.18783	9.54208			20	Polyline7	6.7957		0	0			14	Line33	7.50884		0	0			19	Polyline40	17.1359		0	0			12	Polyline11	9.36215		0	0
		7.25707	12.0039	6.23775	11.9273	5.87708	5.70731	7.11322	6.19417	6.52907	7.249	6.97627	6.07387	6.19239	9.57249			1	Polyline8	6.84087		0	0			14	Line34	6.16815		0	0			19	Polyline41	9.90018		0	0			12	Line12	5.76891		0	0
		7.26565	12.0089	6.24292	11.9481	5.87963	5.7077	7.12064	6.19769	6.5297	7.24997	6.9822	6.08165	6.19257	9.64707			2	Polyline8	6.85525		0	0			14	Line35	5.56158		0	0			20	Polyline1	9.65481		0	0			12	Polyline13	12.4776		0	0
		7.28215	12.0461	6.24623	11.9945	5.87982	5.70983	7.12605	6.19778	6.53392	7.25202	6.98257	6.08432	6.19297	9.6875			3	Polyline8	7.2485		0	0											20	Polyline2	15.4151		0	0			12	Polyline14	9.01429		0	0
		7.28889	12.0614	6.25357	12.0167	5.88191	5.71116	7.12729	6.20009	6.53396	7.25351	6.98547	6.08442	6.2014	9.69905			5	Polyline8	8.12324		0	0											20	Polyline3	11.6755		0	0			12	Polyline15	8.81719		0	0
		7.29613	12.1879	6.2565	12.0229	5.88514	5.71577	7.13058	6.2135	6.53407	7.25593	6.98974	6.08561	6.20203	9.69978			6	Polyline8	5.35175		0	0											20	Polyline4	14.1548		0	0			12	Polyline16	8.21174		0	0
		7.29671	12.1906	6.26168	12.0815	5.88767	5.72456	7.13432	6.21419	6.53513	7.25638	6.99385	6.09174	6.20245	9.7214			7	Polyline8	8.9975		0	0											20	Polyline5	10.4702		0	0			12	Polyline17	5.16444		0	0
		7.29827	12.1976	6.26558	12.1469	5.88831	5.72849	7.14936	6.2177	6.53526	7.2608	6.99467	6.09275	6.20349	9.7912			8	Polyline8	17.4702		0	0											20	Polyline6	9.99021		0	0			12	Polyline18	12.2488		0	0
		7.3012	12.1998	6.26943	12.1484	5.89091	5.7306	7.14945	6.22781	6.53953	7.26279	6.99679	6.09478	6.20473	9.80844			9	Polyline8	4.86525		0	0											20	Polyline7	6.31398		0	0			12	Polyline19	8.0789		0	0
		7.3047	12.2127	6.27235	12.2005	5.89243	5.73182	7.15147	6.23083	6.54009	7.26809	7.00029	6.09771	6.20726	9.84292			10	Polyline8	6.95835		0	0											20	Polyline8	6.72754		0	0			12	Polyline20	9.55956		0	0
		7.30503	12.2286	6.27368	12.2049	5.89281	5.73221	7.17281	6.23095	6.5405	7.26863	7.00285	6.09964	6.2093	9.9707			11	Polyline8	11.6046		0	0											20	Polyline9	16.8714		0	0			12	Polyline21	7.72855		0	0
		7.30722	12.2392	6.27808	12.2277	5.89686	5.73258	7.17404	6.23643	6.54535	7.27	7.00329	6.10027	6.20967	10.0001			12	Polyline8	5.70353		0	0											20	Polyline10	12.2162		0	0			12	Polyline22	11.9035		0	0
		7.31826	12.3014	6.27838	12.2434	5.8971	5.73284	7.18021	6.23964	6.54752	7.27404	7.00531	6.10137	6.21257	10.0017			14	Polyline8	12.2415		0	0											20	Line11	1.83042		0	0			12	Polyline24	10.0335		0	0
		7.32006	12.3023	6.27846	12.2459	5.89851	5.7331	7.19362	6.24522	6.54752	7.27461	7.00532	6.10743	6.21601	10.0079			16	Polyline8	5.09043		0	0											20	Polyline12	14.692		0	0			12	Polyline25	11.3044		0	0
		7.32181	12.3274	6.28026	12.247	5.90097	5.73337	7.19535	6.24878	6.55038	7.28695	7.00667	6.10767	6.21697	10.0221			18	Polyline8	8.11814		0	0											20	Polyline13	7.05499		0	0			12	Polyline26	8.14398		0	0
		7.32803	12.3437	6.29768	12.2561	5.9017	5.73532	7.20167	6.25481	6.55114	7.2882	7.0088	6.10797	6.22288	10.055			19	Polyline8	20.7786		0	0											20	Polyline14	12.6618		0	0			12	Polyline27	12.7897		0	0
		7.32864	12.3785	6.29862	12.2827	5.9022	5.73585	7.20934	6.25497	6.55892	7.28965	7.01801	6.10919	6.22694	10.0562			20	Polyline8	12.2832		0	0											20	Polyline15	7.87593		0	0			12	Polyline28	6.13824		0	0
		7.33846	12.3803	6.30936	12.3527	5.90347	5.73714	7.2242	6.27081	6.56721	7.29138	7.0246	6.11361	6.22949	10.057			1	Polyline9	7.21672		0	0											20	Polyline16	12.5065		0	0			12	Polyline29	9.61913		0	0
		7.34028	12.4145	6.31169	12.3982	5.90539	5.73938	7.22532	6.27248	6.57037	7.29283	7.02734	6.11442	6.23245	10.0994			2	Polyline9	9.76295		0	0											20	Polyline17	22.767		0	0			13	Polyline1	6.831		0	0
		7.34171	12.4281	6.31179	12.4661	5.9056	5.74071	7.22845	6.28285	6.57262	7.29569	7.02956	6.11738	6.2327	10.1256			3	Polyline9	7.27096		0	0											20	Line18	10.8488		0	0			13	Polyline2	12.1367		0	0
		7.34948	12.4726	6.31675	12.469	5.90935	5.74164	7.23721	6.28363	6.57575	7.29643	7.03815	6.11765	6.23393	10.1415			4	Polyline9	8.91104		0	0											20	Line19	1.84879		0	0			13	Polyline3	12.1301		0	0
		7.36724	12.5271	6.32122	12.4724	5.90953	5.74201	7.24067	6.28692	6.60114	7.31151	7.04679	6.11831	6.23472	10.1507			6	Polyline9	14.4619		0	0											20	Polyline20	20.0831		0	0			13	Polyline4	10.8872		0	0
		7.37548	12.5329	6.32287	12.4844	5.91059	5.74232	7.24266	6.2876	6.60417	7.31368	7.04705	6.11914	6.2352	10.154			8	Polyline9	13.2948		0	0											20	Polyline21	9.82252		0	0			13	Polyline5	8.86626		0	0
		7.37807	12.5925	6.32657	12.5077	5.91078	5.74282	7.24515	6.29044	6.60572	7.31445	7.05188	6.12117	6.23779	10.1738			9	Polyline9	12.8371		0	0											20	Polyline22	25.5973		0	0			13	Polyline6	8.5204		0	0
		7.38378	12.6353	6.32856	12.5578	5.91577	5.74574	7.24814	6.2937	6.60684	7.31601	7.05794	6.12223	6.23862	10.1768			11	Polyline9	16.0673		0	0											20	Polyline23	10.9712		0	0			13	Polyline7	9.24046		0	0
		7.38385	12.6503	6.33035	12.6401	5.91586	5.75174	7.25038	6.29794	6.61334	7.31678	7.06702	6.1229	6.24064	10.1814			12	Polyline9	8.8945		0	0											20	Line24	4.27619		0	0			13	Polyline8	12.039		0	0
		7.38698	12.6566	6.33995	12.6419	5.91987	5.75256	7.26341	6.29979	6.61599	7.33325	7.0673	6.12377	6.24155	10.2032			13	Polyline9	6.5102		0	0											20	Polyline25	16.9626		0	0			13	Polyline10	9.80067		0	0
		7.39232	12.7303	6.34081	12.6554	5.92118	5.75629	7.26867	6.30259	6.61726	7.34531	7.06948	6.12677	6.24186	10.2348			14	Polyline9	7.68022		0	0											20	Polyline26	9.12081		0	0			13	Polyline11	10.8724		0	0
		7.39306	12.7401	6.3457	12.6559	5.92776	5.75833	7.26925	6.30981	6.61997	7.34531	7.07386	6.12694	6.24682	10.2891			15	Polyline9	5.98287		0	0											20	Polyline27	8.58464		0	0			13	Line12	7.02752		0	0
		7.39491	12.7663	6.35007	12.6967	5.92796	5.75876	7.26979	6.31432	6.6211	7.35396	7.07498	6.1288	6.25171	10.3087			16	Polyline9	6.10882		0	0											20	Polyline28	11.2358		0	0			13	Polyline13	7.80277		0	0
		7.39505	12.7892	6.35375	12.718	5.92868	5.75884	7.26985	6.3147	6.62285	7.35462	7.07855	6.12917	6.2562	10.3096			17	Polyline9	7.63902		0	0											20	Polyline29	7.31557		0	0			14	Polyline1	7.98786		0	0
		7.39746	12.8018	6.35685	12.7456	5.93012	5.75895	7.27322	6.32017	6.62446	7.35664	7.07972	6.13174	6.25815	10.3458			18	Polyline9	8.75372		0	0											20	Polyline30	8.95498		0	0			14	Polyline2	6.62922		0	0
		7.40179	12.8577	6.35951	12.7465	5.93353	5.76294	7.30511	6.32283	6.62737	7.35894	7.08023	6.13326	6.2615	10.3604			20	Polyline9	7.13748		0	0											20	Polyline31	8.82711		0	0			14	Polyline3	8.36612		0	0
		7.40562	12.8959	6.36016	12.7617	5.93977	5.76406	7.30652	6.32633	6.62995	7.37731	7.08082	6.13709	6.26402	10.3974																			20	Polyline32	12.3075		0	0			14	Polyline4	9.70175		0	0
		7.42202	12.9299	6.36069	12.7699	5.94079	5.76515	7.30794	6.33137	6.63826	7.38463	7.08245	6.13768	6.2665	10.426																			20	Polyline33	10.9105		0	0			14	Polyline6	6.5239		0	0
		7.42571	12.9614	6.3614	12.7887	5.94711	5.76617	7.3088	6.34185	6.6384	7.39146	7.08648	6.1379	6.26923	10.4575																			20	Polyline34	11.0457		0	0			14	Polyline9	8.61519		0	0
		7.44902	12.9705	6.36649	12.8365	5.94809	5.77265	7.31213	6.34434	6.64636	7.39228	7.09328	6.13976	6.26991	10.4658																			20	Polyline35	12.1563		0	0			14	Polyline10	10.3962		0	0
		7.45015	12.9848	6.36829	12.8796	5.94955	5.773	7.31369	6.34969	6.64651	7.40291	7.0946	6.14038	6.27	10.4719																			20	Polyline36	9.26783		0	0			14	Polyline11	8.45148		0	0
		7.45071	13.0306	6.37405	12.9301	5.94959	5.78461	7.32367	6.35309	6.65144	7.40716	7.09607	6.14111	6.2701	10.4877																			20	Polyline37	11.657		0	0			14	Polyline12	6.81542		0	0
		7.45185	13.0309	6.37445	12.9451	5.95055	5.78574	7.32955	6.35355	6.65237	7.41593	7.09734	6.14306	6.2718	10.5227																			20	Polyline38	16.9889		0	0			14	Polyline13	7.92314		0	0
		7.45835	13.0361	6.37687	12.9783	5.95176	5.78822	7.34137	6.35593	6.66534	7.42093	7.09961	6.14553	6.27695	10.606																											14	Polyline14	11.8918		0	0
		7.45911	13.0754	6.38573	12.9793	5.95235	5.79377	7.36253	6.35951	6.67197	7.42451	7.10313	6.14748	6.28299	10.6316																											14	Polyline15	10.2064		0	0
		7.46401	13.0829	6.3874	12.9899	5.95299	5.79419	7.37535	6.36032	6.67319	7.42459	7.10585	6.15917	6.28405	10.6822																											14	Polyline16	10.0182		0	0
		7.46517	13.0843	6.39386	13.0012	5.95375	5.79636	7.37992	6.36178	6.67685	7.4289	7.107	6.16054	6.28543	10.8003																											14	Polyline17	9.35971		0	0
		7.48692	13.0895	6.39407	13.02	5.95559	5.79636	7.38007	6.362	6.67993	7.429	7.10903	6.16111	6.28715	10.8137																											14	Polyline18	9.47305		0	0
		7.49555	13.0957	6.39498	13.0747	5.95564	5.79888	7.38282	6.36398	6.68352	7.43053	7.11124	6.16665	6.29339	10.8239																											15	Polyline1	8.15238		0	0
		7.49881	13.1042	6.39533	13.1629	5.95656	5.80232	7.39543	6.36883	6.6873	7.43066	7.1175	6.16842	6.29909	10.8245																											15	Polyline2	10.0698		0	0
		7.50397	13.1243	6.39546	13.2033	5.95822	5.80494	7.40423	6.37428	6.68735	7.43158	7.11787	6.17103	6.31539	10.8268																											15	Polyline4	7.00132		0	0
		7.50607	13.1399	6.39915	13.2214	5.95864	5.80661	7.40566	6.37523	6.69098	7.43865	7.12393	6.1711	6.31702	10.8519																											15	Polyline5	11.7766		0	0
		7.51429	13.1708	6.40476	13.225	5.95894	5.80725	7.41357	6.37602	6.6931	7.43901	7.12657	6.1745	6.31862	10.854																											15	Polyline6	5.75427		0	0
		7.52432	13.1755	6.40806	13.2362	5.95936	5.80871	7.41659	6.3897	6.69583	7.44274	7.12911	6.17575	6.31963	10.9243																											15	Polyline8	6.51682		0	0
		7.52794	13.2147	6.41095	13.2527	5.95988	5.80894	7.41758	6.39369	6.69753	7.44307	7.13054	6.17644	6.32286	10.9634																											15	Polyline9	9.82316		0	0
		7.54728	13.2558	6.41717	13.309	5.9609	5.80898	7.42347	6.39638	6.69912	7.44768	7.13401	6.17818	6.32435	10.9675																											15	Polyline10	12.898		0	0
		7.54799	13.2674	6.42504	13.3163	5.96176	5.81222	7.42651	6.39688	6.70333	7.44829	7.13825	6.18373	6.32835	11.0029																											15	Polyline11	6.13209		0	0
		7.55806	13.2895	6.43085	13.3314	5.96192	5.8155	7.43393	6.39772	6.70786	7.4489	7.13962	6.18581	6.32927	11.0132																											15	Line12	9.62395		0	0
		7.55952	13.2955	6.43248	13.3402	5.96521	5.82218	7.45038	6.40056	6.71201	7.45209	7.1433	6.18595	6.331	11.0267																											15	Polyline13	11.9013		0	0
		7.56061	13.3449	6.43854	13.388	5.96797	5.82557	7.45594	6.40174	6.71739	7.45338	7.14564	6.18776	6.33291	11.0447																											15	Line14	6.85588		0	0
		7.56409	13.3451	6.45172	13.3929	5.97078	5.82584	7.461	6.40217	6.71894	7.46271	7.1531	6.19267	6.33992	11.0614																											15	Polyline15	10.099		0	0
		7.57238	13.4195	6.45589	13.4442	5.97454	5.82829	7.48032	6.40282	6.72048	7.46418	7.15368	6.19672	6.34314	11.0657																											15	Polyline16	7.70858		0	0
		7.5775	13.4361	6.45834	13.4907	5.9749	5.83013	7.48518	6.40301	6.72418	7.46468	7.15491	6.19977	6.34383	11.1069																											15	Polyline17	11.5112		0	0
		7.57753	13.4464	6.46028	13.492	5.97595	5.83189	7.49304	6.41598	6.73045	7.46483	7.16017	6.20079	6.34549	11.1467																											15	Polyline18	6.70617		0	0
		7.57955	13.4619	6.4606	13.492	5.98002	5.8355	7.49311	6.41605	6.73269	7.474	7.16305	6.20439	6.34586	11.1537																											15	Line20	7.54672		0	0
		7.59428	13.5004	6.46245	13.4938	5.98192	5.83721	7.49567	6.41719	6.73285	7.47521	7.16422	6.20546	6.34988	11.2045																											15	Line21	9.53109		0	0
		7.59578	13.5407	6.46384	13.4986	5.98629	5.83854	7.51018	6.42424	6.73813	7.48123	7.16637	6.20768	6.35002	11.2301																											15	Line22	10.3121		0	0
		7.60243	13.5553	6.46395	13.5121	5.98772	5.84248	7.51415	6.42761	6.74432	7.48308	7.16837	6.20833	6.35087	11.2477																											15	Polyline23	10.4335		0	0
		7.60436	13.5857	6.46746	13.547	5.99321	5.8457	7.51798	6.43043	6.77725	7.48676	7.17098	6.21048	6.35247	11.2577																											15	Polyline24	5.63948		0	0
		7.61381	13.5866	6.46952	13.5473	5.99505	5.84606	7.5199	6.43158	6.78819	7.48805	7.1773	6.21291	6.35364	11.3955																											15	Polyline25	7.07691		0	0
		7.62616	13.6473	6.47073	13.5626	5.99795	5.84808	7.52851	6.43331	6.80523	7.49104	7.17807	6.21422	6.35426	11.4007																											15	Polyline26	6.36183		0	0
		7.63	13.6661	6.47344	13.5705	5.99802	5.85261	7.54293	6.43476	6.81011	7.49115	7.17886	6.21493	6.35461	11.5083																											15	Polyline27	9.19609		0	0
		7.63049	13.6968	6.47488	13.5745	6.00003	5.85364	7.55296	6.43838	6.83585	7.49362	7.18268	6.21744	6.35477	11.5473																											15	Polyline28	7.6242		0	0
		7.63217	13.7308	6.47893	13.5895	6.00751	5.854	7.55524	6.43919	6.84649	7.4943	7.1836	6.2201	6.35623	11.5786																											15	Polyline29	11.1518		0	0
		7.64439	13.7453	6.483	13.6125	6.00892	5.8561	7.55785	6.44322	6.8466	7.50005	7.18808	6.22062	6.36078	11.6363																											15	Polyline31	12.1861		0	0
		7.64989	13.8087	6.48913	13.636	6.01	5.85612	7.56251	6.4433	6.85811	7.50713	7.19121	6.22262	6.36378	11.6718																											15	Polyline32	7.03889		0	0
		7.65194	13.8136	6.49197	13.6769	6.01053	5.85774	7.56412	6.44596	6.86355	7.51239	7.19274	6.22335	6.36659	11.7873																											15	Polyline33	8.56082		0	0
		7.67192	13.8187	6.49456	13.7245	6.01166	5.86128	7.58855	6.44721	6.86471	7.51356	7.19358	6.2378	6.37309	11.8179
		7.68237	13.918	6.49677	13.745	6.01457	5.86371	7.60699	6.44849	6.87486	7.51452	7.19397	6.25017	6.37357	11.8456
		7.68398	13.9541	6.49881	13.7493	6.01684	5.86415	7.61075	6.45027	6.87618	7.52001	7.19839	6.25333	6.37569	11.8587
		7.68625	14.0115	6.50262	13.7609	6.02095	5.86657	7.61333	6.45051	6.88309	7.52158	7.20845	6.2548	6.3758	11.8753
		7.69471	14.059	6.50415	13.8255	6.02462	5.86876	7.61645	6.4512	6.88632	7.52309	7.21472	6.25702	6.37634	11.882
		7.71859	14.0603	6.50537	13.855	6.02647	5.8688	7.6174	6.4585	6.89137	7.52463	7.21474	6.25962	6.3772	11.9047
		7.72505	14.0698	6.51101	13.9156	6.02648	5.87087	7.62512	6.46577	6.8937	7.52753	7.22451	6.26067	6.37732	11.9062
		7.74084	14.1021	6.51582	13.9401	6.03119	5.87221	7.64636	6.46668	6.90276	7.52756	7.22484	6.26133	6.37753	11.9327
		7.74754	14.1233	6.51619	13.9428	6.03279	5.87267	7.64807	6.47299	6.90568	7.52839	7.23577	6.26295	6.37772	11.9411
		7.75377	14.2243	6.52005	14.0182	6.03335	5.87575	7.65227	6.47866	6.90745	7.5493	7.24284	6.26313	6.3806	12.0085
		7.75605	14.3139	6.5237	14.0407	6.04713	5.87576	7.65262	6.48005	6.9099	7.55362	7.2468	6.26394	6.38207	12.0174
		7.76064	14.3616	6.52753	14.0695	6.05165	5.87638	7.65306	6.48053	6.91032	7.56352	7.24945	6.26421	6.3841	12.0398
		7.76301	14.3988	6.52855	14.1336	6.05247	5.8812	7.65792	6.48516	6.91113	7.56478	7.25139	6.27007	6.38441	12.0417
		7.76442	14.407	6.52902	14.2041	6.06045	5.88273	7.66075	6.48736	6.91187	7.56714	7.25678	6.27097	6.3848	12.0442
		7.76631	14.4239	6.53342	14.2548	6.06191	5.884	7.66548	6.49709	6.92346	7.56771	7.25704	6.27431	6.38739	12.154
		7.77523	14.4426	6.53443	14.3003	6.06532	5.88543	7.67247	6.50873	6.92583	7.57323	7.25813	6.27596	6.38742	12.1632
		7.7843	14.4554	6.54155	14.3173	6.07124	5.88826	7.67834	6.50997	6.93052	7.5738	7.25825	6.27967	6.38901	12.3927
		7.79648	14.512	6.54193	14.3544	6.07126	5.89164	7.67948	6.51186	6.93239	7.5818	7.26736	6.28187	6.39069	12.4356
		7.80496	14.5217	6.54597	14.443	6.07348	5.89623	7.67961	6.51634	6.9355	7.58588	7.26787	6.28344	6.39705	12.4628
		7.81017	14.5612	6.547	14.4983	6.07688	5.89637	7.68131	6.51699	6.93668	7.5887	7.27541	6.28853	6.3972	12.5567
		7.81128	14.6521	6.54828	14.5485	6.07746	5.89647	7.68568	6.52373	6.93692	7.59077	7.27746	6.2914	6.39889	12.6934
		7.82507	14.6606	6.54947	14.6157	6.07957	5.89776	7.68831	6.52432	6.94059	7.59104	7.2837	6.29326	6.40345	12.8765
		7.84382	14.7412	6.55021	14.6195	6.0814	5.8979	7.69265	6.5266	6.94952	7.59115	7.29715	6.29751	6.40388	13.0618
		7.85273	14.7558	6.55174	14.6621	6.08221	5.90029	7.6928	6.53006	6.95277	7.59362	7.30269	6.30035	6.40518	13.0751
		7.85862	14.7742	6.55237	14.6853	6.08668	5.90231	7.6949	6.53285	6.96059	7.60385	7.30379	6.30192	6.41033	13.0787
		7.8631	14.8181	6.55367	14.7347	6.08788	5.90366	7.70875	6.53319	6.96427	7.61196	7.30776	6.30384	6.41097	13.1266
		7.86422	14.8782	6.56912	14.8032	6.08847	5.9083	7.71607	6.5337	6.96609	7.61457	7.31353	6.30992	6.41779	13.2073
		7.86885	14.8838	6.5738	14.8174	6.08944	5.9091	7.72653	6.53482	6.96971	7.61991	7.31357	6.31227	6.41909	13.4355
		7.86972	14.9132	6.57923	14.8292	6.09692	5.90928	7.73297	6.53483	6.97327	7.62741	7.31587	6.31354	6.4209	13.4401
		7.88029	14.9406	6.58226	14.8428	6.09787	5.91005	7.73599	6.5352	6.98203	7.62777	7.31779	6.3146	6.42559	13.5311
		7.89515	14.9949	6.58555	14.8453	6.09802	5.91187	7.73659	6.5373	6.98205	7.62827	7.3212	6.31777	6.43131	13.5943
		7.89544	15.0191	6.59011	14.8523	6.0985	5.91305	7.74057	6.53792	6.98318	7.62963	7.32256	6.32074	6.43943	13.6323
		7.89774	15.0596	6.59399	14.9281	6.0989	5.91676	7.74772	6.5394	6.98385	7.63196	7.33102	6.32092	6.44179	13.6453
		7.91014	15.1161	6.59598	14.9389	6.10232	5.91987	7.74951	6.5473	6.9853	7.63252	7.33769	6.32536	6.443	13.6483
		7.91286	15.1488	6.59926	14.9658	6.1027	5.92038	7.75174	6.55316	6.98847	7.63555	7.34011	6.32592	6.44611	13.795
		7.91523	15.1549	6.60419	14.9909	6.107	5.9244	7.76059	6.56025	6.99322	7.63678	7.35604	6.32667	6.44735	13.8184
		7.92778	15.1948	6.60556	15.0105	6.11465	5.93333	7.76669	6.56351	7.00152	7.63701	7.35964	6.32865	6.44819	13.9615
		7.94993	15.2277	6.60583	15.0405	6.11913	5.9367	7.76884	6.56915	7.00663	7.64092	7.36148	6.33516	6.44836	13.9757
		7.95205	15.3167	6.60744	15.0428	6.12064	5.93705	7.78713	6.57596	7.00873	7.64438	7.37268	6.33526	6.45428	14.0259
		7.95271	15.321	6.61033	15.0709	6.12514	5.94338	7.79106	6.5776	7.00923	7.65573	7.37655	6.33667	6.4543	14.0282
		7.95582	15.3512	6.61293	15.1221	6.1271	5.94376	7.80411	6.57813	7.0114	7.66022	7.37808	6.33757	6.45524	14.0897
		7.97531	15.4656	6.61368	15.1537	6.12757	5.94379	7.81842	6.57997	7.01283	7.66116	7.37809	6.33797	6.46058	14.2196
		7.9759	15.5064	6.61374	15.1745	6.12809	5.94463	7.83679	6.58345	7.04062	7.67796	7.38081	6.34177	6.4614	14.3069
		7.97641	15.5087	6.61881	15.2093	6.1285	5.94593	7.8394	6.58548	7.04126	7.67866	7.38411	6.34456	6.46182	14.4405
		7.9776	15.5149	6.61935	15.2119	6.12864	5.94639	7.84074	6.59435	7.04348	7.69371	7.38684	6.34627	6.46355	14.5262
		7.98675	15.5342	6.62227	15.2995	6.13215	5.94783	7.88702	6.60285	7.04585	7.69688	7.39616	6.34701	6.46422	14.6443
		7.99218	15.5958	6.62228	15.3018	6.13507	5.9493	7.88978	6.60854	7.04609	7.70212	7.39619	6.3486	6.46432	14.6875
		8.00823	15.7659	6.62735	15.4433	6.13801	5.95796	7.89921	6.61538	7.04895	7.70795	7.40354	6.35024	6.46616	14.7123
		8.01071	15.8366	6.62988	15.4989	6.14135	5.95903	7.90016	6.61593	7.05161	7.71147	7.40646	6.35205	6.46649	14.9771
		8.01628	15.8442	6.63013	15.5022	6.14137	5.96019	7.90048	6.61808	7.05517	7.71891	7.4109	6.35227	6.46804	14.9779
		8.02517	15.8457	6.63942	15.5334	6.14138	5.96025	7.90948	6.62061	7.05896	7.72027	7.41372	6.35278	6.46935	15.044
		8.02973	15.8546	6.64285	15.5524	6.14377	5.96158	7.91408	6.62085	7.0592	7.7211	7.41432	6.3531	6.46953	15.3057
		8.03158	15.86	6.64942	15.5547	6.14495	5.96643	7.93844	6.62445	7.06001	7.73077	7.41815	6.35546	6.46977	15.4669
		8.03321	15.8662	6.65632	15.5598	6.14572	5.96733	7.95637	6.63008	7.06664	7.73657	7.42414	6.3558	6.47113	15.506
		8.03874	15.9054	6.65972	15.5644	6.14602	5.97387	7.95788	6.63089	7.06746	7.73837	7.42566	6.35595	6.47232	15.6395
		8.06085	15.9611	6.66199	15.592	6.14756	5.97662	7.96482	6.63524	7.07053	7.74226	7.43191	6.35893	6.47879	15.6807
		8.08157	15.9733	6.66227	15.7092	6.14873	5.97756	8.00212	6.63588	7.07086	7.74448	7.43191	6.36048	6.48077	15.7669
		8.09431	15.9846	6.66628	15.7171	6.15015	5.98053	8.00252	6.63747	7.08455	7.74524	7.44234	6.36103	6.48149	15.9307
		8.09598	16.0338	6.66854	15.7745	6.15026	5.98236	8.00612	6.64087	7.08964	7.75262	7.44322	6.36153	6.49557	16.0233
		8.10091	16.0463	6.66898	15.8005	6.15027	5.98285	8.01036	6.64436	7.09192	7.75702	7.44544	6.36315	6.50251	16.2292
		8.10962	16.0734	6.67144	15.9541	6.15032	5.98681	8.01607	6.64599	7.09962	7.75922	7.4465	6.36413	6.51136	16.281
		8.12169	16.091	6.67353	15.963	6.15084	5.98749	8.02114	6.64912	7.10573	7.76284	7.44971	6.36683	6.51165	16.4315
		8.13471	16.1036	6.67531	15.995	6.15231	5.98869	8.02371	6.65666	7.10914	7.76795	7.45489	6.3709	6.51537	16.7029
		8.13727	16.1556	6.67546	16.0414	6.15465	5.99253	8.02383	6.65683	7.10917	7.77114	7.46773	6.37317	6.51567	16.7358
		8.13851	16.2452	6.67821	16.1335	6.15486	5.99321	8.03751	6.6605	7.11823	7.77383	7.47366	6.37873	6.51756	16.862
		8.15588	16.2472	6.68564	16.1607	6.15683	5.99445	8.04769	6.66122	7.12112	7.77504	7.47792	6.37975	6.52716	16.9394
		8.16904	16.2883	6.6866	16.2032	6.15716	6.00256	8.05808	6.66535	7.12144	7.77908	7.48373	6.38067	6.52788	16.993
		8.1745	16.3768	6.68925	16.3447	6.16069	6.003	8.07436	6.66775	7.1319	7.78195	7.48837	6.38237	6.52903	17.1895
		8.17514	16.4553	6.68955	16.3465	6.16145	6.00318	8.07603	6.66861	7.13353	7.78776	7.48849	6.38268	6.52982	17.3326
		8.17692	16.4747	6.69349	16.3752	6.16447	6.00799	8.09667	6.67202	7.13514	7.80706	7.48908	6.38311	6.53021	17.447
		8.18183	16.5433	6.69711	16.3867	6.1657	6.00806	8.10983	6.68124	7.14058	7.8086	7.48913	6.3869	6.53036	17.4617
		8.18615	16.5464	6.7003	16.3911	6.16632	6.00887	8.1272	6.6825	7.14212	7.80892	7.49033	6.38719	6.53064	17.4935
		8.18646	16.6179	6.71096	16.481	6.16779	6.0109	8.12929	6.68436	7.14413	7.80956	7.49037	6.38721	6.53108	17.7195
		8.19839	16.6778	6.71211	16.527	6.16869	6.01288	8.13801	6.68744	7.14512	7.81214	7.49076	6.39181	6.53305	17.9293
		8.20649	16.7082	6.7134	16.6079	6.1724	6.01556	8.14527	6.68781	7.16094	7.81305	7.49087	6.39315	6.53353	18.1633
		8.20992	16.7238	6.72134	16.6105	6.17385	6.01729	8.14685	6.69969	7.16864	7.81342	7.49246	6.39722	6.53588	18.3146
		8.21745	16.7483	6.7244	16.6705	6.18733	6.019	8.17212	6.70126	7.17314	7.81466	7.4992	6.39861	6.54012	18.3797
		8.21835	16.7948	6.72449	16.7407	6.19207	6.01927	8.17556	6.7025	7.17379	7.8244	7.50059	6.40005	6.54039	18.3992
		8.21885	16.7981	6.7274	16.7471	6.19346	6.02033	8.17723	6.70577	7.17681	7.82541	7.50202	6.4025	6.54067	18.4176
		8.21937	16.8059	6.72844	16.7519	6.19744	6.02273	8.17993	6.70639	7.17774	7.83199	7.50471	6.40567	6.54237	18.5718
		8.22591	16.8345	6.73106	16.778	6.19804	6.02382	8.19237	6.707	7.17914	7.83717	7.50852	6.40822	6.546	18.582
		8.23368	16.839	6.73481	16.8185	6.19815	6.02413	8.19602	6.70833	7.18285	7.84114	7.51072	6.41353	6.54667	18.5886
		8.23635	16.9187	6.73498	16.8185	6.19831	6.02678	8.20556	6.7145	7.2	7.8412	7.51355	6.41618	6.55091	18.9494
		8.23769	16.9189	6.73908	16.8197	6.20021	6.0337	8.20869	6.71756	7.20018	7.85277	7.51535	6.41758	6.55304	20.789
		8.24234	16.927	6.73944	16.8296	6.20389	6.03449	8.22076	6.72031	7.20132	7.85376	7.51658	6.42021	6.56592	20.8118
		8.25826	17.0593	6.74112	16.8784	6.20465	6.03499	8.23478	6.72262	7.20136	7.85464	7.52137	6.42381	6.56967	21.3428
		8.27222	17.0764	6.74375	16.8994	6.20483	6.03724	8.24686	6.72544	7.20483	7.85535	7.52166	6.42479	6.57238	21.3758
		8.27418	17.1322	6.74619	16.9503	6.20538	6.03859	8.25284	6.73476	7.21193	7.86538	7.52593	6.425	6.57414	21.6954
		8.27517	17.2134	6.74772	17.0335	6.208	6.03887	8.25653	6.74087	7.21429	7.87014	7.52699	6.42522	6.58279	22.383
		8.28648	17.2318	6.74813	17.035	6.20919	6.04119	8.26013	6.74185	7.21594	7.87082	7.53583	6.42614	6.58456	23.0652
		8.28755	17.2391	6.75946	17.063	6.20962	6.04969	8.26176	6.74588	7.22213	7.875	7.54239	6.42653	6.58732	23.4343
		8.30196	17.2857	6.75968	17.1734	6.2129	6.05169	8.28505	6.75609	7.22566	7.89211	7.54844	6.42658	6.58874	23.5908
		8.3119	17.3395	6.76929	17.1791	6.21418	6.05808	8.29226	6.77639	7.22789	7.89235	7.55107	6.4273	6.59133	24.0433
		8.3191	17.5128	6.77652	17.1942	6.21567	6.06058	8.30722	6.77975	7.2306	7.89371	7.55147	6.43215	6.59529	24.2285
		8.32777	17.5205	6.77707	17.2051	6.21568	6.06137	8.30837	6.77997	7.23398	7.8948	7.55285	6.43285	6.60098	24.5956
		8.329	17.5763	6.77977	17.2552	6.21637	6.06189	8.3115	6.79372	7.24532	7.90488	7.55767	6.43491	6.60128	24.6843
		8.33085	17.66	6.77979	17.2592	6.21638	6.06495	8.31776	6.80242	7.25218	7.90597	7.5585	6.43755	6.60267	27.1785
		8.34284	17.7506	6.78126	17.2691	6.2175	6.06527	8.32455	6.80358	7.25234	7.90666	7.55967	6.43846	6.60372	28.1383
		8.34459	17.7892	6.78156	17.3091	6.2181	6.07258	8.33213	6.80401	7.25302	7.90738	7.56199	6.4387	6.60579	29.4337
		8.34762	17.9728	6.78673	17.3518	6.22025	6.07332	8.33752	6.80683	7.25321	7.9092	7.56318	6.43915	6.60651	33.3716
		8.35082	17.9766	6.78945	17.3952	6.22422	6.07484	8.34776	6.80735	7.25323	7.91045	7.56779	6.44877	6.6088	35.6438
		8.35611	18.1161	6.78947	17.4082	6.22594	6.07525	8.35315	6.81065	7.26597	7.91239	7.57038	6.44936	6.61048	35.6495
		8.35623	18.1685	6.78985	17.4262	6.22781	6.07626	8.35581	6.81585	7.27193	7.91274	7.57059	6.4511	6.61122	36.1235
		8.36732	18.1695	6.79672	17.4283	6.2289	6.08001	8.37434	6.81587	7.27314	7.91313	7.57135	6.45116	6.61239	38.207
		8.3771	18.1732	6.80529	17.4544	6.22957	6.08041	8.38444	6.81603	7.27423	7.91325	7.57165	6.45144	6.61616	39.8863
		8.39041	18.2414	6.80536	17.4661	6.23003	6.08627	8.39207	6.81914	7.27585	7.91584	7.57262	6.45167	6.61693	43.1618
		8.39325	18.2798	6.81272	17.4748	6.23472	6.08721	8.39967	6.83246	7.27996	7.92329	7.57328	6.45329	6.61913
		8.39616	18.3136	6.81309	17.5093	6.23789	6.08792	8.40841	6.83276	7.28429	7.93195	7.576	6.46091	6.62365
		8.40158	18.3404	6.81325	17.5125	6.23983	6.08824	8.41759	6.83681	7.28441	7.93386	7.57687	6.46368	6.62541
		8.42284	18.4172	6.82298	17.5209	6.24362	6.09436	8.41896	6.8369	7.28697	7.93778	7.58247	6.46603	6.62662
		8.42393	18.4288	6.82325	17.5245	6.24368	6.09448	8.42443	6.84115	7.28848	7.94073	7.5844	6.47117	6.6276
		8.42535	18.4826	6.82412	17.5831	6.24401	6.09501	8.42722	6.84247	7.28899	7.95346	7.59402	6.47175	6.6297
		8.42546	18.5347	6.83313	17.5953	6.25233	6.09557	8.43152	6.84257	7.29409	7.95693	7.59694	6.47373	6.63068
		8.42876	18.5734	6.84147	17.6156	6.2527	6.0984	8.43823	6.84387	7.29435	7.95808	7.5979	6.4757	6.6324
		8.4416	18.6063	6.84374	17.6624	6.25711	6.10007	8.44171	6.84732	7.29501	7.97204	7.60009	6.47736	6.6382
		8.44196	18.7616	6.84598	17.6938	6.25746	6.10175	8.44515	6.84766	7.29558	7.97257	7.60753	6.47835	6.65298
		8.44809	18.8254	6.84818	17.7493	6.25838	6.10354	8.46122	6.85377	7.29818	7.97343	7.60854	6.47877	6.65353
		8.45067	18.8369	6.85028	17.7698	6.25916	6.10822	8.47869	6.86156	7.31651	7.98037	7.6114	6.48358	6.65508
		8.46694	18.9259	6.85662	17.7928	6.25941	6.11073	8.47883	6.86823	7.32595	7.98263	7.61215	6.48374	6.65607
		8.47067	18.9428	6.85847	17.832	6.26585	6.11696	8.49831	6.86827	7.32689	7.98353	7.61907	6.49163	6.65792
		8.49619	19.0793	6.85848	17.8931	6.26879	6.11726	8.50998	6.86899	7.33424	7.98748	7.62367	6.49179	6.66159
		8.50115	19.0856	6.86054	17.9775	6.27669	6.11843	8.54016	6.87351	7.33651	7.9938	7.62525	6.49684	6.66408
		8.5418	19.0919	6.86403	18.0321	6.27886	6.12076	8.54375	6.87358	7.33983	7.99407	7.62826	6.49765	6.66587
		8.54364	19.1358	6.86521	18.0499	6.27916	6.12503	8.5508	6.88068	7.34289	7.99724	7.6325	6.50498	6.66603
		8.5497	19.1816	6.86969	18.1896	6.28037	6.12514	8.56116	6.8819	7.35272	8.00711	7.63486	6.51173	6.66655
		8.55285	19.2079	6.87191	18.2286	6.28053	6.12826	8.57235	6.88351	7.36669	8.01228	7.63699	6.51231	6.67102
		8.56483	19.2174	6.87293	18.2799	6.28485	6.13069	8.57474	6.88697	7.37022	8.01294	7.63778	6.51812	6.67153
		8.59943	19.2911	6.87421	18.3489	6.28514	6.13789	8.57872	6.88988	7.3728	8.0133	7.63814	6.5235	6.67158
		8.60739	19.3211	6.87948	18.511	6.28615	6.13942	8.57893	6.90097	7.37514	8.01513	7.63817	6.52539	6.67292
		8.61025	19.355	6.89083	18.5167	6.28794	6.14499	8.58089	6.90198	7.37516	8.01761	7.64605	6.52569	6.67475
		8.62705	19.3811	6.89125	18.5752	6.28958	6.14781	8.58962	6.91106	7.37532	8.02045	7.64957	6.52652	6.67507
		8.62868	19.4825	6.89587	18.6232	6.29074	6.15077	8.6005	6.91281	7.37615	8.02131	7.65093	6.53193	6.68069
		8.64033	19.7346	6.90421	18.6244	6.29177	6.15137	8.60083	6.91403	7.38001	8.02471	7.66026	6.5345	6.68092
		8.64955	19.7552	6.90513	18.6661	6.29337	6.15137	8.60502	6.91617	7.38143	8.02519	7.66074	6.53474	6.68094
		8.65239	19.7594	6.91241	18.6687	6.29378	6.15305	8.60596	6.91656	7.38584	8.02733	7.66303	6.5356	6.68154
		8.65694	19.7773	6.91604	18.7448	6.30105	6.15333	8.61223	6.91894	7.38775	8.03584	7.66569	6.53649	6.68326
		8.66621	19.89	6.91679	18.784	6.3054	6.15932	8.61895	6.92054	7.39378	8.04082	7.66678	6.53959	6.68731
		8.67019	19.9581	6.9169	18.7925	6.30649	6.15967	8.62471	6.92162	7.39673	8.04412	7.67461	6.54138	6.68823
		8.6743	20.0494	6.92522	18.8232	6.30893	6.16042	8.6459	6.9217	7.39996	8.05058	7.68422	6.54141	6.6903
		8.68002	20.1537	6.92691	18.8789	6.31179	6.16193	8.6568	6.92257	7.41108	8.06356	7.68425	6.54263	6.70172
		8.68892	20.2096	6.9272	18.955	6.31419	6.1634	8.6803	6.92295	7.42072	8.07409	7.68491	6.54347	6.70223
		8.6922	20.246	6.93102	18.9812	6.31517	6.16528	8.68792	6.92401	7.42224	8.07423	7.68852	6.54959	6.70707
		8.69593	20.247	6.93267	19.0605	6.31802	6.16638	8.68957	6.926	7.42454	8.07514	7.69032	6.56195	6.71184
		8.70828	20.3437	6.93537	19.1173	6.31806	6.17362	8.69174	6.9318	7.44234	8.08095	7.69181	6.56499	6.71302
		8.70895	20.6581	6.93774	19.1209	6.32008	6.17894	8.69352	6.93243	7.45779	8.08102	7.6929	6.57224	6.72507
		8.71129	20.854	6.93898	19.1294	6.32163	6.18087	8.71649	6.93334	7.46238	8.08468	7.69729	6.57424	6.72799
		8.72306	20.9123	6.93999	19.134	6.32267	6.1855	8.74062	6.93378	7.46416	8.08861	7.69768	6.57447	6.72897
		8.73487	21.0313	6.94106	19.1648	6.3229	6.18698	8.74092	6.94066	7.46499	8.08924	7.70074	6.57693	6.72909
		8.7358	21.0394	6.94151	19.1878	6.32688	6.1877	8.74266	6.94593	7.49502	8.09385	7.70652	6.57703	6.72991
		8.74464	21.1407	6.94332	19.2242	6.3298	6.19099	8.75716	6.94846	7.49751	8.09906	7.70866	6.57743	6.72994
		8.75341	21.181	6.94345	19.3507	6.33109	6.19155	8.7673	6.96468	7.49851	8.10272	7.71106	6.5785	6.73325
		8.75609	21.233	6.94399	19.3766	6.33158	6.19626	8.7718	6.97185	7.50064	8.10481	7.72142	6.58131	6.73392
		8.75883	21.3145	6.94467	19.3885	6.33375	6.19874	8.77244	6.97219	7.50363	8.10497	7.72185	6.58314	6.73513
		8.76791	21.4139	6.94696	19.4641	6.33456	6.19928	8.78278	6.97825	7.50691	8.1133	7.72694	6.58639	6.73581
		8.77152	21.4759	6.9482	19.4844	6.33569	6.20237	8.79167	6.98119	7.50999	8.11369	7.72971	6.58779	6.73766
		8.78674	21.544	6.95201	19.5045	6.33693	6.20355	8.79497	6.98382	7.5192	8.12659	7.73826	6.58857	6.73919
		8.78856	21.5704	6.95565	19.5331	6.33943	6.20362	8.7957	6.98579	7.52512	8.1303	7.74733	6.58997	6.74218
		8.7988	21.8128	6.95615	19.5991	6.34182	6.20584	8.80194	6.98606	7.52969	8.14045	7.74979	6.59156	6.74546
		8.80209	21.8258	6.96267	19.6551	6.34514	6.2068	8.80341	6.98694	7.53269	8.14165	7.75135	6.59179	6.74787
		8.80823	21.9992	6.96277	19.7088	6.34684	6.2075	8.80594	6.98707	7.54884	8.14679	7.75938	6.59274	6.74796
		8.83396	22.288	6.96889	19.721	6.347	6.20792	8.80899	6.98791	7.55447	8.14773	7.76166	6.59387	6.75007
		8.84323	22.3404	6.97092	19.783	6.34717	6.20937	8.82868	6.99779	7.56072	8.1547	7.76488	6.59745	6.75224
		8.84437	22.3774	6.97448	19.9707	6.34858	6.20988	8.85769	7.00685	7.56762	8.15539	7.77666	6.59835	6.75409
		8.85895	22.3774	6.97619	20.0286	6.3486	6.21012	8.86491	7.00814	7.57217	8.15973	7.77706	6.5992	6.75432
		8.86108	22.5924	6.97888	20.1203	6.35754	6.21202	8.87105	7.00824	7.57723	8.15977	7.77989	6.6005	6.75688
		8.86406	22.6131	6.98135	20.133	6.35918	6.21234	8.87662	7.00929	7.58597	8.16134	7.78483	6.60731	6.7653
		8.87787	22.7415	6.98186	20.1746	6.3614	6.21288	8.87987	7.0103	7.59002	8.16569	7.78718	6.60759	6.77334
		8.92201	22.7964	6.98732	20.2041	6.36349	6.21453	8.88034	7.01803	7.59439	8.16702	7.78857	6.60795	6.78197
		8.92788	22.8389	6.99019	20.3666	6.36962	6.21469	8.88592	7.02323	7.59527	8.16754	7.79722	6.60819	6.78891
		8.92871	22.8878	6.99216	20.3849	6.3733	6.21536	8.88891	7.02688	7.60095	8.17073	7.80471	6.60906	6.79403
		8.93101	22.9368	6.99407	20.4122	6.37963	6.21578	8.89304	7.02893	7.60128	8.17317	7.80592	6.60948	6.79434
		8.93252	23.695	6.99871	20.4964	6.38009	6.22438	8.90556	7.0304	7.60953	8.18656	7.81307	6.61421	6.79613
		8.9493	23.7389	6.99976	20.5162	6.3804	6.2247	8.90875	7.0341	7.61453	8.18853	7.81319	6.61504	6.79651
		8.94966	24.3581	7.00369	20.7234	6.38087	6.23064	8.91978	7.03612	7.61569	8.20578	7.81359	6.61546	6.7986
		8.9528	24.4045	7.00448	21.0591	6.38272	6.23234	8.9266	7.03866	7.61579	8.2183	7.81458	6.61784	6.8006
		8.95835	24.5253	7.01012	21.1183	6.3832	6.23454	8.93263	7.04579	7.62157	8.21831	7.81516	6.61792	6.80221
		8.95938	24.7404	7.01034	21.178	6.38346	6.23784	8.9451	7.0491	7.63389	8.2184	7.81796	6.62155	6.80509
		8.961	24.8598	7.01117	21.3484	6.38754	6.23902	8.94925	7.05068	7.63865	8.22126	7.82216	6.62271	6.80958
		8.96836	24.865	7.0132	21.372	6.39493	6.24244	8.96599	7.05532	7.64089	8.22386	7.823	6.62493	6.82035
		8.9752	24.951	7.01322	21.5522	6.39708	6.24245	8.98339	7.05743	7.64705	8.22706	7.8326	6.6263	6.82197
		8.99256	25.0145	7.01619	21.6343	6.39723	6.24306	9.01468	7.05971	7.65303	8.2272	7.83537	6.63231	6.82436
		8.99259	25.2757	7.02271	21.6699	6.4003	6.24566	9.02219	7.06227	7.65668	8.22952	7.83593	6.63589	6.82744
		9.01469	25.3265	7.02679	21.9052	6.40055	6.24874	9.02354	7.06611	7.65671	8.2335	7.83721	6.63795	6.82821
		9.01919	25.3619	7.02974	21.9974	6.40233	6.25656	9.05868	7.06844	7.67153	8.23481	7.85045	6.63863	6.83047
		9.01982	25.5417	7.03258	22.1732	6.40987	6.26197	9.0627	7.06871	7.69346	8.23695	7.85285	6.64118	6.83243
		9.02001	25.8447	7.0336	22.2891	6.41182	6.2627	9.07014	7.07026	7.69401	8.23811	7.8535	6.64617	6.84575
		9.0208	25.8985	7.03442	22.3315	6.41444	6.26293	9.11787	7.07169	7.69541	8.23936	7.85374	6.64646	6.84849
		9.03493	26.2572	7.03716	22.4086	6.41646	6.2639	9.12066	7.07544	7.69669	8.23999	7.85408	6.64833	6.84853
		9.03744	26.3651	7.04079	22.4098	6.41861	6.26489	9.14171	7.07764	7.69776	8.2427	7.857	6.64906	6.84945
		9.06325	26.4957	7.04498	22.6314	6.42037	6.26525	9.16345	7.07814	7.69864	8.24528	7.86485	6.65138	6.85301
		9.07806	26.9139	7.05578	22.8637	6.42133	6.26534	9.16707	7.07827	7.69877	8.24794	7.87028	6.65253	6.85518
		9.08225	26.9514	7.05713	22.8747	6.42201	6.26656	9.19038	7.08022	7.70701	8.25216	7.87625	6.65783	6.85752
		9.08485	27.4505	7.05819	22.9372	6.42366	6.26942	9.19177	7.08657	7.70956	8.26476	7.87644	6.65883	6.86106
		9.10224	27.7028	7.06019	23.1533	6.4278	6.27101	9.19627	7.09484	7.71669	8.27024	7.87837	6.66052	6.86114
		9.1094	27.74	7.06654	23.2031	6.43092	6.27166	9.2029	7.09613	7.72088	8.27096	7.88263	6.66331	6.8629
		9.11308	28.6423	7.07635	23.2361	6.43277	6.27806	9.20709	7.09705	7.73126	8.27213	7.88526	6.66504	6.87069
		9.12046	28.6859	7.08138	23.2956	6.43357	6.27829	9.20877	7.09743	7.73693	8.27794	7.88628	6.66511	6.8722
		9.12548	28.9934	7.09149	23.3095	6.43382	6.27875	9.22086	7.10224	7.74621	8.27808	7.8929	6.66513	6.8723
		9.12962	30.7439	7.09282	23.3211	6.4341	6.27963	9.23973	7.10507	7.74974	8.28114	7.90204	6.66953	6.87356
		9.13855	30.8526	7.09519	23.3626	6.4379	6.28382	9.24067	7.10665	7.75409	8.28342	7.90307	6.66988	6.87418
		9.14864	31.293	7.09529	23.627	6.44611	6.28531	9.24121	7.10669	7.75523	8.28728	7.91365	6.67132	6.87529
		9.15454	34.6969	7.09584	23.888	6.44729	6.28555	9.24199	7.10914	7.75787	8.29002	7.91903	6.67182	6.88466
		9.15735	36.1515	7.10183	23.8905	6.44805	6.2883	9.24376	7.10942	7.75931	8.29634	7.92273	6.67439	6.8854
		9.159	36.7765	7.10267	23.9156	6.44866	6.29039	9.25057	7.11016	7.76667	8.30679	7.9232	6.67542	6.88857
		9.17525	37.5166	7.10563	24.2964	6.45069	6.29074	9.25063	7.11308	7.77663	8.31321	7.93021	6.67611	6.88933
		9.18073	37.6662	7.11253	24.3021	6.4514	6.29083	9.2684	7.11526	7.78172	8.31749	7.93055	6.67818	6.89288
		9.18157	55.3687	7.11373	25.0079	6.45187	6.29184	9.29592	7.12156	7.78252	8.3178	7.93412	6.67827	6.89418
		9.18396		7.11479	25.1935	6.45352	6.29268	9.30511	7.12372	7.78428	8.33176	7.93747	6.67976	6.89605
		9.18813		7.11493	25.7301	6.45403	6.29352	9.31754	7.13243	7.78492	8.33677	7.95399	6.68039	6.90385
		9.21027		7.11642	26.0522	6.45731	6.29491	9.31766	7.1326	7.78671	8.33728	7.95525	6.68204	6.90966
		9.219		7.11878	26.4986	6.46142	6.29658	9.32359	7.13357	7.79204	8.33846	7.95609	6.6824	6.91288
		9.23245		7.12149	27.3757	6.46257	6.29825	9.32462	7.13361	7.80743	8.34414	7.958	6.68375	6.91556
		9.24085		7.12198	27.4232	6.4664	6.30143	9.32585	7.13553	7.81196	8.34866	7.96201	6.6857	6.91982
		9.24403		7.12205	27.9052	6.47091	6.30382	9.32613	7.14738	7.81899	8.35662	7.96638	6.68857	6.92222
		9.27711		7.1232	28.2005	6.47096	6.30541	9.32797	7.16014	7.82017	8.35883	7.96861	6.69104	6.9256
		9.28697		7.12377	28.2818	6.4712	6.30578	9.34825	7.16508	7.82857	8.35999	7.97611	6.69694	6.92738
		9.32324		7.12504	28.3945	6.47487	6.3264	9.34868	7.16723	7.83642	8.36273	7.97744	6.69704	6.92783
		9.32983		7.13267	28.511	6.47616	6.32843	9.34875	7.16884	7.84417	8.37186	7.97809	6.70464	6.93534
		9.33026		7.13608	29.847	6.47645	6.32899	9.34951	7.16994	7.84868	8.38047	7.98947	6.7125	6.9359
		9.33172		7.13661	29.869	6.47646	6.32904	9.38521	7.17	7.85789	8.38407	7.99141	6.71556	6.93741
		9.33242		7.13921	30.4427	6.47728	6.33091	9.39971	7.17127	7.85844	8.39079	7.99212	6.71651	6.93855
		9.33265		7.14266	31.1754	6.47795	6.33118	9.40057	7.17252	7.88005	8.3958	7.99494	6.71882	6.93926
		9.33528		7.14351	31.2503	6.47798	6.33134	9.43185	7.17342	7.88258	8.39835	8.00072	6.71948	6.94177
		9.35837		7.14446	33.7533	6.47922	6.33212	9.43721	7.17657	7.886	8.40614	8.00169	6.72265	6.94631
		9.36298		7.14795	37.4812	6.47958	6.33374	9.45429	7.17683	7.89205	8.40663	8.00305	6.72548	6.94777
		9.36317		7.16378		6.48061	6.338	9.466	7.18299	7.90281	8.41077	8.01168	6.72716	6.94894
		9.37316		7.16503		6.48583	6.33839	9.48499	7.18397	7.90295	8.41628	8.01423	6.73134	6.95016
		9.37359		7.17069		6.48672	6.33962	9.48824	7.18704	7.90573	8.41763	8.0147	6.73138	6.95674
		9.39322		7.17225		6.48775	6.34085	9.50225	7.18748	7.90758	8.41869	8.01584	6.7323	6.9584
		9.39398		7.17369		6.49058	6.34127	9.50596	7.19092	7.90867	8.41933	8.01612	6.73237	6.96127
		9.40291		7.17757		6.49512	6.34246	9.50633	7.19368	7.91006	8.4208	8.01677	6.73365	6.96642
		9.40504		7.18299		6.49681	6.34281	9.50698	7.19912	7.91099	8.42705	8.0234	6.73412	6.96854
		9.42913		7.18372		6.49683	6.34283	9.51363	7.20049	7.91149	8.43499	8.0256	6.73541	6.96861
		9.442		7.18413		6.50168	6.34749	9.53348	7.21591	7.91322	8.43584	8.02685	6.73561	6.96907
		9.44646		7.18849		6.50244	6.34806	9.54302	7.21856	7.93508	8.43753	8.02869	6.73874	6.97817
		9.46225		7.19077		6.50481	6.35126	9.54482	7.21872	7.94295	8.43809	8.03115	6.73955	6.97819
		9.46294		7.19222		6.50605	6.35493	9.54588	7.2243	7.95017	8.43937	8.03851	6.73991	6.98458
		9.47216		7.19287		6.5128	6.35846	9.55286	7.22456	7.96059	8.43987	8.039	6.74376	6.9852
		9.47291		7.19702		6.51446	6.36963	9.55409	7.22928	7.97174	8.4536	8.04223	6.74505	6.9863
		9.47444		7.21681		6.51573	6.36969	9.55922	7.23096	7.98743	8.45493	8.04485	6.75544	6.98868
		9.49345		7.21752		6.51768	6.37039	9.59003	7.23202	7.9942	8.46716	8.06106	6.75589	6.9902
		9.50542		7.23335		6.51824	6.37043	9.60985	7.24408	7.99803	8.46896	8.06178	6.76148	6.99026
		9.52086		7.23387		6.51886	6.37519	9.61664	7.24758	8.0106	8.47311	8.06277	6.76423	6.99089
		9.5234		7.23452		6.5232	6.37546	9.63684	7.24885	8.01436	8.47467	8.06625	6.7661	6.99191
		9.52945		7.23503		6.52321	6.37553	9.64321	7.24902	8.02534	8.48674	8.0722	6.77446	6.99347
		9.5454		7.23806		6.52544	6.37741	9.64344	7.24923	8.03659	8.48842	8.07547	6.77546	7.00497
		9.54805		7.23908		6.53129	6.3787	9.65369	7.24969	8.05126	8.5055	8.07569	6.77757	7.00942
		9.56354		7.23933		6.53208	6.38214	9.66465	7.25038	8.05335	8.51365	8.07946	6.78393	7.01016
		9.56837		7.24813		6.53246	6.38516	9.68104	7.25312	8.05482	8.52193	8.07971	6.78486	7.01217
		9.57096		7.24822		6.53357	6.39091	9.69473	7.25355	8.06053	8.52363	8.08223	6.78849	7.01362
		9.57867		7.24855		6.53616	6.39183	9.6994	7.25737	8.06595	8.53037	8.0824	6.78859	7.01381
		9.59416		7.24875		6.53669	6.39202	9.70234	7.26123	8.07682	8.53607	8.08586	6.79004	7.01566
		9.60548		7.25201		6.53803	6.39684	9.7128	7.26653	8.07756	8.53878	8.08625	6.79041	7.01656
		9.62274		7.25491		6.53996	6.40027	9.73703	7.26986	8.08536	8.55038	8.093	6.79141	7.01721
		9.62288		7.25531		6.54155	6.40341	9.73925	7.2717	8.08748	8.55394	8.10868	6.79311	7.03095
		9.65503		7.25943		6.54195	6.40408	9.76403	7.27225	8.09595	8.55544	8.11108	6.79566	7.03144
		9.67756		7.26233		6.54218	6.40531	9.79498	7.27267	8.09613	8.55685	8.11379	6.79714	7.0318
		9.68015		7.26652		6.54327	6.40571	9.80126	7.27489	8.09916	8.55782	8.12479	6.79733	7.03704
		9.68669		7.27039		6.5441	6.408	9.80393	7.28068	8.10499	8.55971	8.12605	6.79761	7.03712
		9.70427		7.28622		6.54505	6.40967	9.82596	7.28716	8.10696	8.5598	8.12614	6.79991	7.04185
		9.72013		7.29318		6.5464	6.41001	9.83697	7.29726	8.10915	8.56286	8.13206	6.80004	7.0419
		9.74381		7.30235		6.54751	6.41028	9.84602	7.30088	8.11338	8.56411	8.13364	6.80173	7.04304
		9.75001		7.30292		6.54862	6.41224	9.85724	7.30509	8.11639	8.56693	8.13928	6.80297	7.04355
		9.77736		7.3035		6.552	6.41605	9.86637	7.30628	8.12667	8.57403	8.14042	6.80371	7.04622
		9.77819		7.30916		6.55413	6.41777	9.88602	7.30643	8.13342	8.58029	8.14413	6.80388	7.0516
		9.77919		7.30938		6.55524	6.41961	9.89591	7.31785	8.13408	8.58078	8.14769	6.80551	7.0527
		9.77958		7.31421		6.55721	6.43082	9.89982	7.32047	8.1387	8.59316	8.14786	6.80581	7.05825
		9.78108		7.32495		6.5628	6.43259	9.90012	7.32286	8.14031	8.59637	8.14817	6.806	7.06124
		9.78523		7.32891		6.57419	6.43333	9.91244	7.32507	8.14033	8.59892	8.15653	6.81008	7.07071
		9.78886		7.33199		6.58199	6.4377	9.91971	7.33594	8.14182	8.60375	8.15663	6.81054	7.07089
		9.82943		7.36411		6.58251	6.441	9.93336	7.33751	8.14516	8.60827	8.15779	6.81589	7.07948
		9.83053		7.36805		6.5837	6.44824	9.97179	7.34125	8.14964	8.61297	8.1584	6.81735	7.08919
		9.85695		7.37407		6.58775	6.4486	9.97631	7.34638	8.15535	8.61466	8.15953	6.82401	7.0935
		9.87304		7.38075		6.59104	6.45076	9.98158	7.3505	8.15903	8.62607	8.16141	6.82679	7.10147
		9.88818		7.38956		6.59121	6.45081	9.99138	7.35186	8.1592	8.627	8.16161	6.83459	7.1025
		9.89299		7.39284		6.59122	6.46422	9.99325	7.35388	8.16324	8.63388	8.16356	6.83746	7.10864
		9.90506		7.39369		6.59215	6.46444	10.0278	7.35824	8.16749	8.63503	8.16901	6.8417	7.10932
		9.91472		7.3972		6.59934	6.46548	10.0966	7.35868	8.17353	8.64037	8.16959	6.84452	7.11013
		9.91683		7.40193		6.60213	6.47312	10.1126	7.36056	8.18166	8.64778	8.17556	6.84505	7.11121
		9.93361		7.40444		6.60215	6.47401	10.1259	7.36136	8.18315	8.66658	8.19715	6.84673	7.11197
		9.9399		7.40507		6.60223	6.47531	10.14	7.3618	8.18587	8.66683	8.20059	6.84793	7.11566
		9.94243		7.42571		6.60281	6.47676	10.1465	7.36582	8.22082	8.67322	8.20237	6.85023	7.11667
		9.95932		7.42947		6.60559	6.47733	10.1618	7.3671	8.22269	8.67687	8.21768	6.85116	7.12011
		9.99357		7.43307		6.60677	6.4826	10.1633	7.36822	8.22276	8.67934	8.22006	6.85287	7.1214
		10.001		7.43311		6.60942	6.4896	10.1795	7.37556	8.22611	8.68107	8.22052	6.85315	7.12216
		10.0035		7.43584		6.6098	6.49407	10.1847	7.37635	8.22757	8.68419	8.22723	6.85544	7.12566
		10.0081		7.4374		6.61034	6.50405	10.2209	7.37665	8.23439	8.68427	8.24121	6.85794	7.12581
		10.0217		7.43749		6.61155	6.50489	10.272	7.37925	8.24029	8.69181	8.24183	6.85925	7.12621
		10.0253		7.43937		6.61193	6.50645	10.2965	7.38054	8.24505	8.69469	8.25447	6.85964	7.13261
		10.0282		7.44781		6.61304	6.51405	10.311	7.38195	8.25321	8.69634	8.25563	6.86087	7.13427
		10.0599		7.45939		6.61325	6.51452	10.3259	7.39306	8.25571	8.69803	8.26122	6.86192	7.14069
		10.066		7.46196		6.61536	6.51518	10.3321	7.39623	8.27293	8.69902	8.26677	6.86511	7.15126
		10.0878		7.46447		6.61738	6.51748	10.3486	7.39699	8.2808	8.70117	8.27272	6.86566	7.16297
		10.0907		7.46576		6.62082	6.51919	10.3528	7.41076	8.28527	8.70152	8.27534	6.86677	7.16308
		10.0925		7.46652		6.62249	6.5202	10.3949	7.41094	8.28854	8.70995	8.27784	6.86833	7.17016
		10.0973		7.46796		6.62346	6.52235	10.4158	7.42193	8.29056	8.71254	8.2829	6.87134	7.1707
		10.1122		7.4691		6.62361	6.52719	10.4853	7.42445	8.29261	8.71287	8.2834	6.87158	7.17286
		10.1277		7.49066		6.62898	6.52796	10.4985	7.42983	8.29348	8.71813	8.28399	6.8731	7.17347
		10.1317		7.49276		6.6358	6.53155	10.507	7.43104	8.29709	8.72375	8.28582	6.87568	7.17481
		10.1492		7.49621		6.64106	6.53546	10.5093	7.43222	8.29788	8.72476	8.28656	6.89074	7.17597
		10.1601		7.50086		6.64286	6.53621	10.6002	7.43244	8.29955	8.72563	8.28722	6.8944	7.17608
		10.1838		7.51379		6.64483	6.53775	10.6021	7.43744	8.30267	8.72964	8.29459	6.89716	7.1783
		10.1894		7.51435		6.64631	6.54008	10.6063	7.43762	8.30559	8.73173	8.29622	6.89728	7.18206
		10.1968		7.51446		6.6496	6.55067	10.6072	7.43904	8.31011	8.7399	8.29667	6.90222	7.18391
		10.2149		7.51865		6.65125	6.55141	10.6174	7.4445	8.31566	8.74604	8.30281	6.90223	7.18697
		10.2475		7.52115		6.65556	6.55223	10.6232	7.44539	8.32003	8.75253	8.30579	6.90421	7.18809
		10.25		7.52515		6.65633	6.5672	10.6687	7.44544	8.32857	8.76197	8.3136	6.90477	7.19009
		10.2509		7.52664		6.65668	6.56807	10.6891	7.46516	8.33595	8.76588	8.31772	6.90767	7.19199
		10.2564		7.52729		6.65804	6.5722	10.7009	7.46532	8.33721	8.76628	8.33157	6.90816	7.19204
		10.2734		7.52776		6.66426	6.57494	10.7175	7.46656	8.3413	8.76828	8.34275	6.91534	7.21131
		10.2804		7.52932		6.66513	6.57626	10.72	7.47166	8.35173	8.77086	8.34278	6.91574	7.21207
		10.2817		7.53414		6.66615	6.57898	10.7691	7.4746	8.35701	8.77503	8.34299	6.91801	7.21273
		10.2836		7.54066		6.67105	6.58123	10.7965	7.48177	8.36069	8.77959	8.35198	6.91946	7.21449
		10.297		7.54508		6.67246	6.58693	10.8914	7.48619	8.36094	8.78646	8.35212	6.91993	7.21554
		10.3019		7.54836		6.68071	6.58728	10.9078	7.49026	8.36185	8.78835	8.35602	6.92035	7.21717
		10.3196		7.55309		6.68213	6.58867	10.9653	7.49145	8.37231	8.7969	8.35917	6.92727	7.21767
		10.3254		7.55318		6.68723	6.59044	11.0157	7.49498	8.37644	8.80016	8.36683	6.92861	7.21819
		10.3274		7.55791		6.69034	6.59203	11.1653	7.4953	8.37826	8.81087	8.36791	6.93162	7.22449
		10.3418		7.56552		6.69201	6.59602	11.1955	7.49911	8.38731	8.81476	8.36854	6.93272	7.22839
		10.3581		7.56703		6.69321	6.59776	11.2447	7.50067	8.39312	8.81736	8.38393	6.93536	7.23211
		10.3592		7.56802		6.69572	6.5994	11.3583	7.50569	8.41013	8.82045	8.38677	6.9375	7.23267
		10.3721		7.57318		6.70607	6.60112	11.4072	7.50655	8.41223	8.82839	8.38724	6.93857	7.24098
		10.3749		7.57866		6.71237	6.60325	11.4278	7.50747	8.41372	8.8343	8.3875	6.9395	7.24939
		10.3854		7.58131		6.71323	6.60857	11.4972	7.51674	8.41444	8.84194	8.38944	6.94221	7.25198
		10.4071		7.58341		6.71619	6.61039	11.7662	7.52785	8.42336	8.84756	8.38999	6.94323	7.25232
		10.4122		7.58363		6.71644	6.61061	11.7861	7.52801	8.4244	8.85564	8.39123	6.94325	7.25565
		10.415		7.58549		6.71738	6.61188	11.9599	7.5344	8.42761	8.85779	8.40702	6.94463	7.27026
		10.4162		7.58668		6.71847	6.61511	11.9772	7.54586	8.43183	8.86921	8.40719	6.94621	7.28672
		10.4207		7.5888		6.72034	6.61678	12.0021	7.5483	8.4331	8.88213	8.40843	6.95092	7.28921
		10.4551		7.60109		6.72096	6.61972	12.2086	7.55063	8.438	8.8857	8.41174	6.9545	7.29698
		10.4552		7.60385		6.72587	6.62157	12.7099	7.55733	8.43998	8.88673	8.41238	6.95538	7.30112
		10.4711		7.61057		6.72633	6.62756	12.7326	7.56103	8.4562	8.89094	8.41396	6.95599	7.30283
		10.5002		7.61621		6.72762	6.6413	12.8162	7.56194	8.47226	8.89145	8.41538	6.95898	7.30377
		10.5102		7.61683		6.73013	6.64308	12.846	7.56671	8.48122	8.89358	8.41726	6.96573	7.30665
		10.511		7.62062		6.73042	6.64609	12.8853	7.56903	8.49784	8.89385	8.42021	6.96857	7.30872
		10.5453		7.62132		6.73051	6.65019	12.9178	7.57411	8.51105	8.89753	8.42303	6.96982	7.31138
		10.5761		7.62478		6.73753	6.6515	12.9851	7.57726	8.53416	8.90205	8.42689	6.96992	7.31432
		10.6471		7.63051		6.73834	6.65281	13.1854	7.57816	8.53547	8.90959	8.42783	6.97383	7.31438
		10.7737		7.63403		6.74057	6.65302	13.4972	7.59034	8.53714	8.91208	8.42823	6.97636	7.31751
		10.867		7.6355		6.7406	6.65345	13.8774	7.59992	8.5495	8.9152	8.42967	6.9768	7.31752
		10.8737		7.63769		6.74127	6.65656	14.3567	7.60163	8.55139	8.91743	8.43155	6.97882	7.31766
		10.874		7.63829		6.74179	6.65798	14.8755	7.60947	8.55948	8.91792	8.43244	6.97973	7.32175
		10.8754		7.64012		6.74341	6.65836	16.533	7.61302	8.56665	8.91836	8.43477	6.98096	7.34047
		10.8865		7.64022		6.75829	6.66084	17.5869	7.61415	8.56834	8.92431	8.43575	6.98143	7.34585
		10.9213		7.64423		6.75844	6.6621		7.61742	8.57667	8.92633	8.44605	6.98462	7.34955
		10.9288		7.64483		6.76134	6.6657		7.61801	8.59126	8.92744	8.44782	6.98509	7.35198
		10.9695		7.64551		6.76535	6.66574		7.61852	8.59284	8.9284	8.45858	6.98623	7.35208
		10.9937		7.64585		6.76753	6.6734		7.62428	8.6059	8.92917	8.45962	6.98837	7.35594
		11.0381		7.64845		6.7685	6.67342		7.62471	8.60929	8.93143	8.46422	6.99154	7.3578
		11.0642		7.66085		6.77013	6.67914		7.62471	8.61252	8.93668	8.46493	6.996	7.35809
		11.0938		7.67743		6.7702	6.67999		7.6271	8.61266	8.94208	8.47405	6.99689	7.3604
		11.1068		7.68126		6.77071	6.68074		7.62766	8.6221	8.94734	8.47541	6.99986	7.36128
		11.1338		7.69095		6.77196	6.68233		7.63398	8.62932	8.97949	8.47572	7.00006	7.36198
		11.2243		7.69491		6.77256	6.68348		7.63449	8.63517	8.98664	8.47618	7.00007	7.36685
		11.2704		7.69818		6.77573	6.68378		7.635	8.64527	8.99442	8.47965	7.00204	7.3705
		11.2742		7.70166		6.7789	6.685		7.63581	8.64657	8.99757	8.47995	7.0064	7.37099
		11.2785		7.70414		6.78011	6.68905		7.63749	8.66388	9.00404	8.48261	7.01265	7.37257
		11.2985		7.70769		6.78086	6.69537		7.63756	8.664	9.00541	8.48355	7.02115	7.3732
		11.3401		7.71073		6.78663	6.69644		7.64425	8.66766	9.00815	8.48478	7.02314	7.37634
		11.3809		7.71357		6.78736	6.70039		7.64823	8.66963	9.01332	8.48658	7.03024	7.38084
		11.3936		7.72111		6.7964	6.70651		7.64828	8.6794	9.03443	8.48976	7.04576	7.3823
		11.3981		7.72248		6.79897	6.7082		7.64847	8.67975	9.05179	8.4928	7.04772	7.38242
		11.4185		7.72974		6.80187	6.71053		7.64978	8.69048	9.05225	8.50712	7.04824	7.3851
		11.4419		7.74984		6.80188	6.71166		7.65391	8.69492	9.05347	8.50926	7.05136	7.38535
		11.448		7.75071		6.80292	6.71432		7.65671	8.69884	9.05443	8.51056	7.05316	7.38721
		11.4537		7.75247		6.80315	6.71503		7.66347	8.70245	9.05658	8.51968	7.05342	7.39731
		11.5307		7.75338		6.80476	6.71599		7.66519	8.70262	9.06279	8.52027	7.05499	7.39918
		11.5971		7.75584		6.80598	6.71776		7.66662	8.70959	9.0785	8.52564	7.05561	7.41049
		11.6463		7.76221		6.80704	6.72222		7.67462	8.71253	9.07951	8.52847	7.05761	7.41171
		11.6502		7.76464		6.80723	6.72536		7.67565	8.72515	9.07963	8.53438	7.05821	7.41608
		11.6948		7.76844		6.80872	6.72828		7.67593	8.74708	9.08009	8.53485	7.05961	7.41647
		11.715		7.77034		6.81769	6.73275		7.68109	8.76968	9.08297	8.53512	7.06228	7.41906
		11.7216		7.77041		6.819	6.73372		7.68419	8.77031	9.08577	8.53767	7.06375	7.41988
		11.77		7.77479		6.82031	6.73417		7.68639	8.78518	9.08661	8.5496	7.06455	7.42243
		11.7816		7.7754		6.8247	6.73551		7.69148	8.78689	9.08706	8.55565	7.06512	7.42259
		11.9011		7.77737		6.82508	6.73627		7.69446	8.79626	9.08853	8.55669	7.06632	7.42723
		11.9699		7.78347		6.83034	6.73667		7.6954	8.7979	9.09107	8.5605	7.07066	7.4277
		12.0395		7.78684		6.8356	6.73723		7.69654	8.80067	9.09805	8.56155	7.07322	7.42771
		12.0653		7.80885		6.83567	6.7382		7.69837	8.82468	9.10693	8.56473	7.07674	7.43078
		12.1113		7.8097		6.84704	6.7383		7.70308	8.85085	9.10801	8.56712	7.07728	7.43122
		12.1396		7.81783		6.84728	6.7427		7.70752	8.85677	9.12089	8.56777	7.07776	7.43147
		12.1454		7.82043		6.84827	6.74358		7.70816	8.85746	9.1223	8.56936	7.07868	7.43307
		12.2532		7.82511		6.8488	6.74465		7.7097	8.85898	9.13216	8.57461	7.08077	7.43407
		12.5294		7.82749		6.85054	6.74566		7.71735	8.8663	9.14034	8.59443	7.0834	7.44265
		12.532		7.82843		6.85192	6.74647		7.71932	8.89216	9.14444	8.59549	7.09181	7.44336
		12.5479		7.82863		6.85568	6.74758		7.72163	8.89279	9.16843	8.59934	7.09575	7.44383
		12.9592		7.831		6.85579	6.7563		7.72542	8.89398	9.18166	8.60392	7.09776	7.4466
		13.5989		7.83445		6.85734	6.75636		7.72564	8.89904	9.19432	8.60511	7.09949	7.4514
		13.6539		7.83573		6.85856	6.75692		7.7278	8.91546	9.19762	8.60648	7.09956	7.45258
		13.8089		7.83579		6.86049	6.75728		7.72918	8.91854	9.2059	8.61311	7.10219	7.45269
		14.1953		7.83778		6.864	6.7592		7.74151	8.92124	9.21107	8.61799	7.10603	7.45555
		14.7023		7.84105		6.8673	6.7631		7.74679	8.92314	9.2121	8.61954	7.10814	7.4575
		15.6163		7.84484		6.86772	6.76661		7.75269	8.93442	9.21596	8.62764	7.10867	7.46338
		18.3429		7.85379		6.86847	6.76674		7.75313	8.93681	9.22073	8.62983	7.1095	7.46495
				7.8564		6.87022	6.77311		7.75819	8.94213	9.22753	8.63391	7.10977	7.46658
				7.8606		6.87192	6.77742		7.75905	8.94859	9.23583	8.63614	7.11339	7.47199
				7.87649		6.87397	6.77748		7.76686	8.94873	9.24393	8.63934	7.11353	7.47203
				7.87958		6.87556	6.7789		7.76749	8.95099	9.24936	8.647	7.1146	7.48383
				7.88309		6.88294	6.77897		7.76772	8.95341	9.24971	8.65375	7.11587	7.48487
				7.88743		6.8846	6.77953		7.7735	8.96511	9.2517	8.65939	7.11917	7.48856
				7.88772		6.88732	6.7798		7.77351	8.98273	9.26385	8.66108	7.11974	7.48936
				7.89008		6.88855	6.77981		7.78399	8.9837	9.27182	8.66679	7.12275	7.49202
				7.89045		6.89436	6.78049		7.79247	8.98374	9.2743	8.66732	7.12484	7.49386
				7.89149		6.89495	6.78217		7.7952	8.99873	9.27819	8.67791	7.12802	7.49479
				7.89244		6.89554	6.7972		7.7992	8.99945	9.27971	8.67856	7.12842	7.49663
				7.89649		6.89715	6.79729		7.79926	9.00093	9.28673	8.67966	7.14102	7.49927
				7.8966		6.89858	6.8007		7.80509	9.002	9.29327	8.67993	7.14243	7.49995
				7.89747		6.89924	6.80502		7.80632	9.0056	9.29437	8.68248	7.14406	7.50084
				7.90004		6.9003	6.80749		7.80932	9.01054	9.29991	8.68418	7.14413	7.50135
				7.9022		6.90172	6.80839		7.81056	9.03876	9.31666	8.68503	7.14482	7.50229
				7.90507		6.90237	6.80882		7.81079	9.04649	9.31935	8.68564	7.14596	7.50265
				7.906		6.90359	6.81344		7.82314	9.04715	9.31948	8.69145	7.14966	7.50535
				7.90735		6.9045	6.82318		7.82656	9.04877	9.32336	8.69179	7.15406	7.5056
				7.9221		6.90597	6.8251		7.83508	9.05563	9.32388	8.69451	7.15463	7.50829
				7.92705		6.90809	6.82595		7.8435	9.05582	9.32788	8.71986	7.16476	7.51015
				7.92977		6.90885	6.83509		7.8454	9.05853	9.33017	8.72079	7.16908	7.51054
				7.93191		6.91023	6.83526		7.84547	9.06164	9.33537	8.72081	7.17209	7.5108
				7.93323		6.91121	6.83529		7.84648	9.06964	9.34293	8.72646	7.17365	7.51295
				7.93602		6.91195	6.83623		7.85169	9.07175	9.3478	8.72806	7.17369	7.51683
				7.93824		6.91835	6.83774		7.85318	9.07507	9.3742	8.73076	7.17392	7.51881
				7.93843		6.91842	6.83847		7.85926	9.09119	9.39455	8.73521	7.17524	7.52543
				7.93968		6.91864	6.84615		7.86114	9.09542	9.39809	8.73952	7.17578	7.52708
				7.95922		6.92145	6.848		7.87183	9.10808	9.40116	8.74064	7.17788	7.52825
				7.96134		6.92185	6.85166		7.87383	9.12085	9.40576	8.74088	7.18005	7.5283
				7.96288		6.9235	6.8523		7.87597	9.12107	9.40945	8.7575	7.1845	7.52909
				7.96374		6.92555	6.85487		7.87816	9.12996	9.41287	8.77442	7.19009	7.5332
				7.96601		6.92587	6.85493		7.87899	9.13395	9.41437	8.77756	7.19017	7.53423
				7.96938		6.92712	6.86009		7.88518	9.13413	9.41627	8.77845	7.19029	7.53923
				7.96969		6.92952	6.865		7.8853	9.13938	9.41798	8.7799	7.19059	7.54162
				7.97078		6.93079	6.86863		7.89211	9.14691	9.41853	8.78175	7.19068	7.54213
				7.97167		6.93196	6.87141		7.89747	9.14715	9.41915	8.78792	7.1907	7.54539
				7.97167		6.93439	6.87696		7.90011	9.15282	9.42601	8.79058	7.19157	7.54605
				7.97581		6.93603	6.87702		7.90379	9.1569	9.44223	8.79309	7.19169	7.55192
				8.02064		6.93685	6.88222		7.91429	9.16331	9.44738	8.7949	7.19585	7.55493
				8.02529		6.93805	6.88922		7.93274	9.171	9.44822	8.7974	7.19704	7.56207
				8.03757		6.94028	6.89913		7.93571	9.17588	9.44841	8.79948	7.19708	7.56254
				8.03858		6.94122	6.90389		7.9447	9.1764	9.45184	8.80144	7.20455	7.56544
				8.04384		6.94809	6.90743		7.94838	9.18847	9.45625	8.8026	7.20597	7.56663
				8.04529		6.94879	6.90824		7.94908	9.24383	9.46314	8.8038	7.21487	7.5691
				8.05107		6.95204	6.91628		7.95348	9.24906	9.46372	8.80845	7.21636	7.57675
				8.0531		6.95214	6.91683		7.95843	9.25197	9.46935	8.81124	7.22595	7.58238
				8.06009		6.95378	6.91707		7.95954	9.25234	9.47237	8.81559	7.22628	7.58259
				8.07809		6.95415	6.92125		7.96086	9.25839	9.47337	8.81902	7.22678	7.58325
				8.08337		6.95804	6.92236		7.96157	9.25962	9.47376	8.82182	7.23039	7.58415
				8.0837		6.96166	6.92417		7.96431	9.26465	9.4773	8.8231	7.23228	7.58681
				8.08444		6.96219	6.92492		7.96595	9.26689	9.4795	8.82502	7.23515	7.58875
				8.08517		6.96254	6.92582		7.96797	9.26699	9.48035	8.8402	7.24615	7.58945
				8.08833		6.965	6.92668		7.973	9.27302	9.4842	8.84343	7.24821	7.59026
				8.09532		6.96906	6.92697		7.97394	9.28127	9.48445	8.85417	7.24842	7.59196
				8.10811		6.96946	6.92713		7.97686	9.28253	9.48708	8.85878	7.25274	7.60679
				8.10823		6.97227	6.92881		7.97967	9.29319	9.48728	8.86571	7.25599	7.6091
				8.11214		6.97269	6.92886		7.97972	9.31068	9.49091	8.86695	7.25657	7.61291
				8.1125		6.97364	6.93175		7.9834	9.31521	9.49898	8.87167	7.26118	7.613
				8.11356		6.9799	6.93214		7.98784	9.32088	9.50274	8.88868	7.26858	7.61361
				8.11641		6.98153	6.93517		7.98962	9.32508	9.50365	8.89528	7.2728	7.61665
				8.11817		6.98233	6.9352		7.99123	9.32634	9.51142	8.89767	7.27284	7.6178
				8.11997		6.98342	6.93887		8.00395	9.32864	9.51554	8.90914	7.28964	7.61805
				8.12984		6.98734	6.93904		8.00983	9.35878	9.5195	8.91015	7.29179	7.62053
				8.13857		6.98812	6.94342		8.01232	9.36086	9.52183	8.91176	7.29344	7.62116
				8.14021		6.98878	6.95151		8.02071	9.36853	9.52578	8.9119	7.29587	7.62706
				8.14303		6.98893	6.95626		8.0211	9.38139	9.52601	8.92741	7.2976	7.62722
				8.15		6.99015	6.95788		8.02237	9.38202	9.54645	8.92803	7.29935	7.63294
				8.15396		6.99149	6.95903		8.02237	9.38989	9.55827	8.93875	7.30812	7.63482
				8.15617		6.99649	6.9692		8.02404	9.39574	9.56728	8.94152	7.30815	7.63483
				8.16054		6.9971	6.96951		8.02407	9.40595	9.5835	8.94312	7.30849	7.6362
				8.17265		6.99889	6.97223		8.02763	9.42783	9.58427	8.94379	7.31069	7.63906
				8.17402		7.00293	6.975		8.03258	9.44998	9.58477	8.94506	7.32013	7.64069
				8.17519		7.00764	6.97628		8.04585	9.45468	9.58809	8.9495	7.32259	7.64305
				8.18218		7.01356	6.98164		8.04807	9.46064	9.59097	8.95726	7.3241	7.64436
				8.19104		7.01384	6.98382		8.04845	9.49277	9.59176	8.96267	7.32912	7.64545
				8.20663		7.01691	6.98931		8.05175	9.49382	9.59632	8.97077	7.33024	7.64691
				8.20828		7.01792	6.98981		8.05211	9.50441	9.60034	8.97335	7.3322	7.65203
				8.21333		7.02653	6.99021		8.06338	9.51573	9.6006	8.97699	7.33766	7.66193
				8.21689		7.0281	6.9913		8.06374	9.51697	9.60396	8.98602	7.34185	7.66436
				8.23157		7.03102	6.99306		8.06668	9.52147	9.61704	8.99185	7.34887	7.68164
				8.23754		7.03516	6.99339		8.07532	9.52576	9.62226	9.00158	7.35448	7.68489
				8.24174		7.04194	6.99446		8.10483	9.52577	9.62408	9.0053	7.35736	7.68532
				8.24205		7.04203	6.99483		8.11479	9.52721	9.6249	9.01085	7.36557	7.68688
				8.24863		7.04312	6.99708		8.12088	9.53442	9.62871	9.01145	7.37142	7.68784
				8.25178		7.04496	6.99927		8.1212	9.53959	9.6387	9.01238	7.37181	7.69121
				8.26159		7.04736	7.00019		8.12678	9.54667	9.64526	9.01353	7.37239	7.69324
				8.26428		7.04861	7.0009		8.13151	9.55853	9.64753	9.01808	7.37433	7.69414
				8.26693		7.04874	7.00097		8.13289	9.56668	9.64863	9.01824	7.37528	7.69707
				8.2723		7.05039	7.00479		8.13772	9.57458	9.64948	9.0257	7.376	7.69774
				8.27479		7.05061	7.00527		8.14257	9.57484	9.65043	9.02746	7.37899	7.69948
				8.2838		7.05107	7.0072		8.1456	9.57688	9.65593	9.03011	7.37977	7.69987
				8.28591		7.05159	7.0098		8.14586	9.58423	9.6563	9.04167	7.38798	7.70196
				8.29424		7.05603	7.01088		8.14968	9.58644	9.65919	9.04521	7.38808	7.70756
				8.2963		7.05608	7.01205		8.15048	9.5897	9.66591	9.04542	7.38878	7.71
				8.29742		7.05615	7.01208		8.15288	9.59075	9.66753	9.04662	7.39252	7.71121
				8.29745		7.05862	7.01454		8.15325	9.59565	9.67066	9.05098	7.39634	7.71456
				8.31635		7.05892	7.01637		8.15349	9.59795	9.67276	9.06458	7.39637	7.71468
				8.31773		7.06014	7.01811		8.15478	9.6127	9.68496	9.06816	7.39956	7.71652
				8.32384		7.06097	7.01869		8.15511	9.61355	9.68553	9.06845	7.40198	7.71666
				8.32957		7.06195	7.01928		8.15895	9.62787	9.69361	9.07461	7.40251	7.71761
				8.33339		7.06583	7.02373		8.16615	9.63186	9.69637	9.07479	7.40353	7.72061
				8.34373		7.06647	7.02423		8.16744	9.64645	9.69641	9.07881	7.4046	7.72171
				8.35351		7.06968	7.03145		8.17708	9.64879	9.70127	9.08231	7.40753	7.72568
				8.35908		7.07326	7.03915		8.17709	9.65314	9.71622	9.08404	7.41015	7.72681
				8.36228		7.0757	7.03977		8.17748	9.66448	9.71856	9.09195	7.41213	7.73166
				8.37496		7.07707	7.04008		8.1785	9.67884	9.71959	9.09275	7.42067	7.74055
				8.37578		7.07939	7.04337		8.18021	9.68838	9.72	9.09373	7.42238	7.74888
				8.38633		7.08839	7.0487		8.18526	9.70111	9.72125	9.10663	7.42576	7.74977
				8.40555		7.08962	7.04909		8.19015	9.70517	9.72145	9.10755	7.43154	7.7502
				8.40753		7.09168	7.04972		8.1967	9.71003	9.72171	9.12178	7.43189	7.7503
				8.41439		7.09411	7.05159		8.2011	9.7121	9.72729	9.12236	7.4336	7.75203
				8.42466		7.09527	7.05811		8.2016	9.71287	9.73486	9.12525	7.43425	7.75683
				8.43504		7.09915	7.06162		8.20165	9.71509	9.7415	9.12526	7.43658	7.7573
				8.44902		7.10154	7.06592		8.20286	9.71527	9.74482	9.12852	7.43743	7.7579
				8.45274		7.10352	7.072		8.20782	9.7183	9.75155	9.13158	7.44257	7.75932
				8.45475		7.10413	7.07387		8.21021	9.73729	9.76171	9.13235	7.45642	7.75938
				8.45493		7.10418	7.08266		8.21344	9.74404	9.76794	9.1366	7.45664	7.76887
				8.45874		7.11004	7.08717		8.21798	9.75248	9.77611	9.137	7.45929	7.77063
				8.47218		7.11107	7.09143		8.218	9.76629	9.77759	9.14007	7.46601	7.7708
				8.47476		7.11758	7.09205		8.21884	9.76743	9.78191	9.14397	7.4733	7.78069
				8.48154		7.11786	7.09624		8.23329	9.76997	9.78866	9.14836	7.47406	7.78151
				8.48216		7.12201	7.09627		8.23543	9.78278	9.79072	9.16093	7.47719	7.78692
				8.48595		7.1221	7.09804		8.23909	9.7918	9.79127	9.16581	7.48103	7.79345
				8.49318		7.12325	7.10646		8.24323	9.79445	9.79265	9.16946	7.48417	7.79443
				8.50046		7.12367	7.11084		8.24996	9.79488	9.794	9.17115	7.48687	7.79525
				8.5007		7.12379	7.11136		8.26284	9.80225	9.79974	9.17126	7.48697	7.8002
				8.50367		7.12458	7.11168		8.26907	9.8167	9.8195	9.1749	7.48775	7.80567
				8.50412		7.12758	7.11369		8.27665	9.82802	9.82836	9.17724	7.49243	7.80665
				8.50471		7.12769	7.11652		8.27716	9.83508	9.8388	9.18651	7.49913	7.81278
				8.5176		7.12884	7.12327		8.28715	9.83598	9.83929	9.18657	7.49943	7.81347
				8.52436		7.129	7.12416		8.28811	9.83891	9.85071	9.18811	7.50023	7.81929
				8.52566		7.1305	7.12664		8.2886	9.8471	9.85183	9.19249	7.50053	7.81959
				8.53072		7.13227	7.13206		8.29483	9.85131	9.86133	9.19407	7.50286	7.82701
				8.53955		7.13267	7.13207		8.29503	9.85317	9.86402	9.19421	7.50383	7.8293
				8.55186		7.13283	7.1362		8.29626	9.85532	9.87086	9.19595	7.50518	7.82967
				8.55395		7.13453	7.14587		8.30613	9.87456	9.87495	9.21146	7.50862	7.83137
				8.56025		7.1424	7.14619		8.33803	9.88064	9.88011	9.22222	7.51	7.83236
				8.56476		7.14645	7.15593		8.3472	9.90002	9.89441	9.23016	7.51361	7.83335
				8.56777		7.14791	7.16114		8.34906	9.90239	9.90638	9.23289	7.51412	7.83381
				8.57045		7.14964	7.16285		8.35013	9.91067	9.90644	9.23625	7.51527	7.83955
				8.58149		7.15217	7.16467		8.35063	9.92092	9.90737	9.24028	7.51877	7.84055
				8.59151		7.15276	7.16772		8.35283	9.92343	9.90793	9.24564	7.51905	7.84216
				8.59605		7.15407	7.17362		8.35595	9.92783	9.90965	9.25365	7.52071	7.84386
				8.59649		7.15521	7.17545		8.35599	9.93159	9.91223	9.25731	7.52493	7.84431
				8.60509		7.15681	7.17835		8.3571	9.93408	9.91406	9.26184	7.5273	7.84432
				8.60832		7.16316	7.17923		8.35774	9.94125	9.91538	9.26486	7.52887	7.84757
				8.60931		7.16693	7.1794		8.36044	9.94442	9.91598	9.26553	7.53373	7.85288
				8.61077		7.16955	7.18688		8.36239	9.94445	9.9239	9.26629	7.5435	7.85376
				8.61309		7.17775	7.19254		8.36262	9.95861	9.93135	9.27228	7.54848	7.85383
				8.61626		7.17879	7.19271		8.36482	9.96574	9.9342	9.28344	7.55043	7.85486
				8.62217		7.1802	7.19287		8.37135	9.96775	9.93983	9.29043	7.55779	7.85541
				8.62843		7.18074	7.19324		8.37149	9.97199	9.94904	9.32136	7.55813	7.85731
				8.62978		7.18317	7.19466		8.37501	9.99788	9.96017	9.32766	7.56189	7.86082
				8.63239		7.18343	7.20407		8.37662	10.009	9.9704	9.34867	7.56282	7.86257
				8.63416		7.18386	7.20588		8.37697	10.0146	9.97618	9.35009	7.56309	7.86322
				8.63739		7.18405	7.20595		8.37872	10.0334	9.98087	9.3522	7.56926	7.86421
				8.64067		7.1845	7.21016		8.37904	10.0582	9.98106	9.35286	7.57088	7.86752
				8.64161		7.18483	7.21254		8.38108	10.0588	9.98405	9.35962	7.57122	7.86808
				8.64442		7.18568	7.21806		8.39531	10.0659	9.98697	9.3608	7.57235	7.87291
				8.65618		7.18608	7.22128		8.39617	10.0782	9.9916	9.37371	7.57325	7.88113
				8.66494		7.1865	7.22473		8.40189	10.0869	9.9947	9.37923	7.58303	7.88432
				8.66891		7.18707	7.23171		8.4147	10.0945	9.99604	9.38198	7.58909	7.88711
				8.67111		7.18958	7.23409		8.42277	10.0946	9.99638	9.3953	7.59792	7.8906
				8.67589		7.19083	7.2353		8.42294	10.1029	9.9972	9.39926	7.60809	7.89185
				8.68016		7.19746	7.23549		8.42548	10.1075	10.0039	9.3998	7.61217	7.89211
				8.68637		7.20072	7.23614		8.42592	10.109	10.0189	9.41403	7.61412	7.89258
				8.69266		7.21318	7.24117		8.43636	10.1163	10.0355	9.42333	7.6152	7.89475
				8.71438		7.21523	7.24191		8.43782	10.1186	10.0393	9.42441	7.61591	7.89524
				8.71442		7.22164	7.2422		8.43784	10.1217	10.0433	9.42583	7.61634	7.89562
				8.71611		7.23102	7.24654		8.43814	10.1274	10.0449	9.42854	7.61766	7.90212
				8.72577		7.23125	7.25043		8.44099	10.1291	10.0469	9.43462	7.61987	7.90493
				8.7347		7.23189	7.25303		8.44481	10.1394	10.0499	9.44198	7.6315	7.90952
				8.73717		7.23228	7.25872		8.44525	10.1869	10.0585	9.44291	7.63281	7.91008
				8.74879		7.2361	7.25931		8.44664	10.1911	10.1018	9.44561	7.63664	7.91248
				8.75816		7.24442	7.26461		8.45737	10.2024	10.127	9.44939	7.64164	7.91284
				8.76163		7.24483	7.26663		8.46836	10.2331	10.13	9.4508	7.64943	7.92079
				8.76695		7.24496	7.26758		8.47655	10.2404	10.136	9.45265	7.65398	7.92345
				8.77755		7.24573	7.26812		8.47673	10.2418	10.1617	9.45553	7.65714	7.92824
				8.79126		7.24684	7.27848		8.47893	10.2479	10.1649	9.45881	7.65726	7.93329
				8.82288		7.24797	7.2856		8.48699	10.2482	10.1693	9.47187	7.65943	7.94012
				8.82471		7.25276	7.28895		8.48993	10.2556	10.1725	9.48375	7.66072	7.94811
				8.83212		7.25458	7.29287		8.49232	10.2564	10.1734	9.49822	7.66414	7.95677
				8.83866		7.25661	7.30075		8.50905	10.257	10.1735	9.49846	7.66558	7.96666
				8.83955		7.25876	7.30179		8.52597	10.2604	10.1771	9.51163	7.66622	7.96969
				8.88165		7.26384	7.31046		8.52959	10.2665	10.1778	9.51415	7.66941	7.9739
				8.88959		7.26723	7.31529		8.53671	10.272	10.1825	9.51851	7.6739	7.98044
				8.90292		7.27344	7.32096		8.5416	10.2774	10.1897	9.51889	7.67647	7.9833
				8.90582		7.27397	7.33126		8.54167	10.2825	10.1996	9.52038	7.68619	7.98401
				8.90938		7.281	7.33857		8.54238	10.2896	10.2014	9.52565	7.68723	7.98545
				8.91815		7.28236	7.34081		8.54338	10.2935	10.2034	9.53115	7.68985	7.98726
				8.92336		7.2826	7.34635		8.54636	10.2985	10.2043	9.5314	7.69043	7.991
				8.92797		7.28414	7.35384		8.55096	10.3098	10.2175	9.53217	7.69688	7.99377
				8.92996		7.28654	7.35468		8.55686	10.3196	10.2245	9.5378	7.69816	7.99631
				8.9438		7.2879	7.35582		8.55771	10.3248	10.2355	9.53913	7.7	8.00016
				8.94456		7.29282	7.35647		8.55971	10.3485	10.2356	9.54352	7.70045	8.00858
				8.94557		7.29797	7.36247		8.55986	10.3613	10.2361	9.54998	7.70112	8.00877
				8.94575		7.30181	7.36539		8.5613	10.3623	10.2391	9.56122	7.70212	8.00885
				8.94794		7.30231	7.36642		8.56855	10.3651	10.2632	9.5686	7.70218	8.02163
				8.94822		7.30803	7.37283		8.5729	10.3659	10.2752	9.58459	7.70825	8.02545
				8.94932		7.30825	7.37369		8.58386	10.3744	10.2851	9.59721	7.70975	8.02871
				8.95257		7.30999	7.37537		8.5963	10.3776	10.2878	9.59863	7.70992	8.0338
				8.9598		7.31168	7.38791		8.59745	10.388	10.2892	9.61332	7.71065	8.04384
				8.97211		7.31404	7.38832		8.60481	10.3915	10.2942	9.61652	7.71131	8.04408
				8.98738		7.31459	7.38868		8.60732	10.3972	10.2987	9.62173	7.71255	8.05016
				8.98843		7.32508	7.38916		8.62506	10.4008	10.3002	9.62733	7.71311	8.05064
				8.98985		7.32616	7.3947		8.62797	10.4091	10.3029	9.63993	7.7165	8.05586
				8.99273		7.32771	7.40057		8.62979	10.413	10.3062	9.64548	7.7226	8.06537
				8.99381		7.32934	7.40943		8.63713	10.4186	10.3208	9.65352	7.72494	8.07103
				8.99414		7.33418	7.41106		8.64003	10.4237	10.3311	9.65437	7.72514	8.07446
				8.99526		7.33806	7.42246		8.64499	10.4255	10.3348	9.65534	7.72762	8.07877
				9.00057		7.33819	7.43318		8.65379	10.4281	10.3384	9.67656	7.7294	8.08057
				9.0036		7.33978	7.43773		8.66002	10.4303	10.3462	9.67836	7.73837	8.08064
				9.00607		7.34256	7.43819		8.66051	10.4308	10.3566	9.68095	7.74504	8.08073
				9.01231		7.34665	7.4393		8.66193	10.4311	10.3625	9.68512	7.75671	8.08214
				9.01727		7.34712	7.4458		8.66391	10.443	10.3657	9.68647	7.75832	8.08742
				9.0264		7.3524	7.44693		8.66543	10.4639	10.3696	9.71187	7.76365	8.08816
				9.03285		7.35324	7.44881		8.6677	10.467	10.3764	9.72222	7.76533	8.08855
				9.0419		7.35705	7.44931		8.67856	10.4738	10.3806	9.72709	7.76604	8.09278
				9.04652		7.35779	7.4503		8.67978	10.4772	10.3887	9.72985	7.76792	8.09482
				9.05745		7.36189	7.45206		8.69636	10.4836	10.4179	9.73737	7.77205	8.10047
				9.05999		7.36521	7.45247		8.70853	10.4969	10.4283	9.74517	7.77447	8.10879
				9.06572		7.37249	7.45538		8.71765	10.5151	10.4388	9.75266	7.7765	8.10969
				9.06576		7.37456	7.4564		8.72161	10.5394	10.456	9.76448	7.77711	8.11279
				9.06658		7.38091	7.4593		8.73955	10.5421	10.4572	9.76554	7.78075	8.11543
				9.0672		7.38396	7.46435		8.74257	10.5572	10.4833	9.78332	7.7809	8.11615
				9.07401		7.38697	7.47121		8.74298	10.56	10.4907	9.79905	7.78907	8.11635
				9.07869		7.38903	7.48633		8.74617	10.6455	10.4919	9.80195	7.79675	8.11902
				9.08752		7.39137	7.49048		8.74977	10.6547	10.4988	9.80663	7.80304	8.11975
				9.09186		7.39561	7.49356		8.77341	10.6838	10.5018	9.80863	7.81155	8.12494
				9.11692		7.39647	7.49398		8.77869	10.6928	10.5067	9.83878	7.81305	8.125
				9.11901		7.3993	7.49508		8.78659	10.7215	10.513	9.84061	7.82279	8.13177
				9.12849		7.40062	7.49903		8.79419	10.7402	10.5154	9.84366	7.82288	8.1384
				9.13032		7.40149	7.50095		8.8007	10.7478	10.5233	9.84376	7.82618	8.13969
				9.13135		7.40152	7.50166		8.80223	10.7519	10.5315	9.86153	7.82957	8.14489
				9.13294		7.40177	7.50586		8.80937	10.7588	10.5424	9.86521	7.83135	8.14932
				9.13585		7.4022	7.50903		8.81768	10.7595	10.5444	9.8716	7.83187	8.15064
				9.14003		7.40298	7.51597		8.8238	10.7963	10.5481	9.88611	7.83389	8.15469
				9.1462		7.40721	7.52045		8.82576	10.8003	10.5499	9.88768	7.83458	8.16127
				9.1471		7.41301	7.52133		8.83222	10.8024	10.5516	9.89348	7.84657	8.16313
				9.15408		7.41813	7.5217		8.84611	10.8105	10.5521	9.9023	7.84719	8.16539
				9.15737		7.4194	7.52492		8.84756	10.8139	10.5546	9.90239	7.8507	8.16603
				9.16882		7.42118	7.52842		8.84825	10.819	10.5598	9.90336	7.85144	8.167
				9.18438		7.42247	7.53175		8.85356	10.8191	10.5627	9.91008	7.85733	8.16955
				9.19131		7.42333	7.53921		8.86553	10.8215	10.5634	9.91523	7.86035	8.1712
				9.19186		7.42484	7.5441		8.87134	10.8219	10.5727	9.91846	7.86291	8.17124
				9.20494		7.42776	7.54988		8.87174	10.8235	10.5788	9.91874	7.87032	8.17136
				9.21344		7.42799	7.55101		8.87579	10.8374	10.5997	9.92059	7.87935	8.17799
				9.24418		7.42958	7.55393		8.87764	10.8864	10.605	9.92605	7.8858	8.17989
				9.2508		7.43128	7.55551		8.87925	10.892	10.6084	9.92818	7.88882	8.18241
				9.25523		7.43657	7.55628		8.8801	10.9133	10.6089	9.9381	7.88936	8.19639
				9.26543		7.43702	7.56054		8.88425	10.9349	10.6194	9.94127	7.88992	8.19972
				9.27596		7.43762	7.56062		8.88685	10.9372	10.6197	9.94721	7.89156	8.20452
				9.30496		7.43879	7.56602		8.89296	10.9554	10.6209	9.94882	7.89992	8.20566
				9.30863		7.43899	7.56787		8.90356	10.9572	10.6273	9.94941	7.9033	8.20653
				9.31811		7.43951	7.56873		8.92429	10.9612	10.6352	9.95027	7.90332	8.20902
				9.32399		7.44333	7.56938		8.92442	10.9685	10.6373	9.95139	7.90385	8.20982
				9.33141		7.4447	7.57159		8.92731	10.9699	10.6381	9.96761	7.90431	8.21417
				9.36272		7.44557	7.573		8.9396	11.0017	10.6385	9.97202	7.9051	8.21651
				9.37389		7.44645	7.57345		8.94234	11.0574	10.6419	9.98043	7.90573	8.21732
				9.38341		7.44844	7.57386		8.95033	11.0757	10.6503	9.98295	7.90721	8.21743
				9.38856		7.45031	7.58412		8.9536	11.1049	10.661	9.98317	7.91424	8.22459
				9.39293		7.45184	7.58767		8.95826	11.1166	10.6642	9.98623	7.91509	8.22999
				9.39655		7.45247	7.59134		8.96288	11.1169	10.6792	9.98626	7.91764	8.23125
				9.4127		7.45543	7.59853		8.96483	11.1484	10.6908	9.98892	7.92352	8.23151
				9.42019		7.46344	7.59938		8.96686	11.1921	10.693	9.99047	7.9277	8.23469
				9.44623		7.47028	7.60047		8.98085	11.1922	10.7019	9.99269	7.92935	8.23614
				9.4466		7.47197	7.60074		8.98585	11.1951	10.7028	9.99876	7.92952	8.24302
				9.45225		7.47461	7.61598		8.98701	11.2207	10.7082	10.0031	7.93265	8.24686
				9.45736		7.47691	7.61713		8.98768	11.2387	10.7215	10.024	7.93539	8.24795
				9.4619		7.48344	7.61922		9	11.2391	10.7336	10.0259	7.9403	8.25095
				9.49153		7.4976	7.62422		9.01083	11.2901	10.7373	10.0267	7.94416	8.26732
				9.4962		7.49893	7.62759		9.01121	11.299	10.7376	10.0316	7.95438	8.27658
				9.50686		7.50049	7.62996		9.01249	11.3375	10.7413	10.0338	7.96167	8.27782
				9.51378		7.50152	7.63176		9.04027	11.3388	10.7436	10.0365	7.96705	8.27836
				9.51969		7.50376	7.63369		9.04955	11.3393	10.745	10.0673	7.96736	8.27864
				9.52759		7.5118	7.63597		9.05402	11.3635	10.7495	10.0707	7.96819	8.27969
				9.53117		7.51394	7.63966		9.05971	11.3942	10.756	10.0813	7.96855	8.28021
				9.53127		7.51643	7.64083		9.0701	11.4209	10.7573	10.087	7.96865	8.28088
				9.54167		7.51685	7.64312		9.07121	11.4297	10.7674	10.0919	7.96901	8.28906
				9.57938		7.51843	7.64694		9.07284	11.4642	10.7714	10.0936	7.97351	8.2928
				9.57943		7.51927	7.65361		9.07441	11.4701	10.7728	10.101	7.97573	8.29977
				9.58001		7.52055	7.6589		9.07527	11.495	10.7764	10.1033	7.97769	8.30422
				9.58055		7.52464	7.66306		9.07667	11.525	10.7786	10.1043	7.98272	8.3062
				9.58146		7.52785	7.67606		9.07738	11.5413	10.7871	10.1094	7.98304	8.30673
				9.58257		7.52806	7.68735		9.07804	11.5418	10.799	10.1097	7.98532	8.31396
				9.5845		7.5294	7.69173		9.0784	11.6004	10.8183	10.1156	7.99067	8.31623
				9.59032		7.52975	7.69279		9.07903	11.6188	10.8273	10.1196	7.99152	8.32213
				9.59996		7.53209	7.69514		9.08368	11.6807	10.8279	10.1228	8.00131	8.32395
				9.60482		7.53452	7.69743		9.08494	11.7183	10.8309	10.1327	8.0014	8.33188
				9.6087		7.53496	7.69946		9.08734	11.7194	10.831	10.1364	8.00267	8.33423
				9.64363		7.53731	7.70135		9.08858	11.7204	10.8325	10.1452	8.00323	8.34124
				9.64781		7.54088	7.70205		9.09164	11.7312	10.8373	10.1504	8.00388	8.34867
				9.65206		7.54648	7.70412		9.09199	11.7391	10.8393	10.153	8.00737	8.34884
				9.67058		7.54771	7.70783		9.0954	11.8528	10.8395	10.1539	8.00864	8.34985
				9.67241		7.55991	7.71304		9.10641	11.8678	10.8402	10.1568	8.00921	8.35067
				9.69076		7.5616	7.72766		9.11137	11.8933	10.8469	10.1594	8.00942	8.35268
				9.69382		7.56482	7.73555		9.11541	11.9147	10.8472	10.1599	8.01199	8.35526
				9.70256		7.56568	7.74588		9.11844	11.9263	10.8501	10.1626	8.01546	8.35733
				9.71162		7.56837	7.74779		9.13812	11.9593	10.8621	10.1644	8.01616	8.36639
				9.71717		7.56879	7.75972		9.14434	11.969	10.8712	10.1672	8.0184	8.36744
				9.76793		7.57073	7.76074		9.16191	12.069	10.8752	10.1777	8.01988	8.36777
				9.78142		7.57164	7.76115		9.16826	12.0793	10.8903	10.1806	8.01997	8.37099
				9.7829		7.57374	7.76204		9.17457	12.0957	10.8952	10.191	8.02513	8.37413
				9.79361		7.57429	7.76235		9.20987	12.1774	10.9005	10.197	8.02794	8.37794
				9.79665		7.57501	7.76392		9.21275	12.181	10.9007	10.2332	8.02958	8.37953
				9.81277		7.57674	7.76829		9.21679	12.196	10.9262	10.2345	8.03015	8.38098
				9.8396		7.57942	7.76922		9.21698	12.2037	10.9303	10.239	8.03608	8.38307
				9.84536		7.57989	7.76946		9.23055	12.2348	10.9309	10.2459	8.04556	8.38664
				9.85183		7.58182	7.77227		9.23626	12.3341	10.9444	10.2465	8.04724	8.38931
				9.89935		7.58249	7.77815		9.23633	12.4293	10.9509	10.2473	8.04923	8.39136
				9.90028		7.59291	7.7806		9.2424	12.5058	10.9573	10.2591	8.05041	8.39324
				9.92056		7.59297	7.78102		9.27149	13.6505	10.9609	10.2594	8.05594	8.39589
				9.94294		7.5958	7.78265		9.28125	15.8269	10.9611	10.2638	8.0588	8.40138
				9.95137		7.59659	7.80355		9.29022		10.9683	10.2781	8.05933	8.40304
				9.95424		7.6015	7.804		9.3059		10.9796	10.2836	8.0609	8.40594
				9.97141		7.60326	7.81082		9.31476		10.9946	10.2842	8.06394	8.40721
				9.98518		7.60473	7.81254		9.32037		11.005	10.2951	8.06491	8.40913
				10.0069		7.60487	7.81605		9.32957		11.0065	10.2978	8.07667	8.41126
				10.0384		7.60518	7.82118		9.33197		11.007	10.3031	8.08335	8.41353
				10.0587		7.607	7.82523		9.33401		11.0148	10.309	8.08466	8.4214
				10.0672		7.61413	7.83036		9.33461		11.0153	10.3101	8.08681	8.42463
				10.0966		7.61524	7.83416		9.33541		11.035	10.317	8.09333	8.42473
				10.1185		7.61813	7.84146		9.33648		11.0362	10.3187	8.09719	8.4303
				10.1435		7.61923	7.84427		9.3407		11.0665	10.3239	8.10907	8.43106
				10.1567		7.62294	7.84465		9.35168		11.0666	10.324	8.11838	8.4312
				10.1594		7.63094	7.84741		9.35478		11.0687	10.3291	8.1207	8.43485
				10.1697		7.63256	7.8479		9.35787		11.0869	10.3293	8.12192	8.43719
				10.2015		7.63511	7.84887		9.35957		11.0936	10.3338	8.1221	8.43858
				10.2327		7.64062	7.85878		9.35997		11.1172	10.3373	8.12813	8.43916
				10.2392		7.64119	7.85982		9.37443		11.1329	10.3498	8.13032	8.44839
				10.2517		7.64289	7.86669		9.37816		11.1341	10.3524	8.13316	8.45941
				10.2832		7.64657	7.87523		9.37848		11.141	10.3532	8.13584	8.4636
				10.3167		7.64661	7.87614		9.37848		11.1437	10.3597	8.14355	8.4751
				10.3209		7.65243	7.88052		9.38174		11.1568	10.3611	8.14577	8.48119
				10.3453		7.65324	7.88324		9.40217		11.161	10.3652	8.14932	8.48237
				10.3505		7.65678	7.88609		9.40987		11.1615	10.3691	8.14997	8.48741
				10.379		7.65726	7.88913		9.41146		11.1619	10.3707	8.15261	8.48837
				10.4066		7.66186	7.89147		9.41509		11.1713	10.3711	8.15352	8.49025
				10.4109		7.66273	7.89154		9.42137		11.1902	10.3759	8.15513	8.49109
				10.4139		7.67167	7.89365		9.42192		11.2061	10.3827	8.15533	8.50325
				10.4223		7.67863	7.89754		9.42316		11.2189	10.3886	8.15577	8.50792
				10.4264		7.68631	7.9018		9.42797		11.2191	10.3909	8.15709	8.51105
				10.4746		7.69051	7.90516		9.42993		11.2349	10.406	8.16059	8.51136
				10.4893		7.69078	7.91272		9.43043		11.2609	10.4138	8.16079	8.5115
				10.4934		7.69507	7.91838		9.44266		11.2617	10.4138	8.16173	8.5255
				10.5145		7.69693	7.92607		9.44645		11.2672	10.4227	8.16998	8.52708
				10.5466		7.70087	7.92914		9.44678		11.2686	10.4237	8.17399	8.53087
				10.5471		7.70685	7.93794		9.44823		11.283	10.4465	8.17435	8.5309
				10.5502		7.70694	7.93824		9.45089		11.2912	10.4488	8.17947	8.53385
				10.5613		7.71524	7.94619		9.45217		11.2972	10.4677	8.18326	8.53459
				10.5632		7.7154	7.94656		9.45425		11.311	10.4739	8.18578	8.53498
				10.6187		7.71906	7.95325		9.46219		11.3204	10.4798	8.18756	8.53572
				10.6216		7.72801	7.95587		9.46716		11.3234	10.4955	8.19076	8.53822
				10.6244		7.72915	7.96444		9.47491		11.3369	10.5028	8.19084	8.54201
				10.626		7.73074	7.96514		9.47553		11.3425	10.5067	8.1913	8.54254
				10.6523		7.73381	7.96994		9.47964		11.3489	10.5141	8.19658	8.54303
				10.673		7.7356	7.97266		9.4803		11.3686	10.5196	8.19708	8.54317
				10.6768		7.73638	7.97285		9.49963		11.381	10.53	8.19942	8.5446
				10.6971		7.73688	7.9801		9.51463		11.382	10.5322	8.2028	8.5455
				10.6998		7.73822	7.98011		9.52013		11.3878	10.5538	8.20508	8.54841
				10.7108		7.73863	7.98075		9.52284		11.3977	10.5594	8.20545	8.55228
				10.724		7.74504	7.9843		9.52503		11.4112	10.5606	8.21003	8.55531
				10.7514		7.75481	7.98653		9.52536		11.414	10.5631	8.21272	8.5584
				10.7524		7.75518	7.99027		9.52705		11.4321	10.5673	8.21585	8.55888
				10.7551		7.75521	7.99845		9.5274		11.4362	10.5717	8.22047	8.5707
				10.7909		7.75708	7.9992		9.52947		11.4427	10.5941	8.22259	8.57262
				10.8247		7.7589	8.00358		9.54953		11.448	10.6021	8.2304	8.57413
				10.8278		7.75902	8.00593		9.56643		11.449	10.6027	8.23864	8.58764
				10.8495		7.76032	8.0091		9.56893		11.4589	10.6181	8.25043	8.59058
				10.8979		7.76048	8.0175		9.58084		11.4673	10.6199	8.25562	8.596
				10.9405		7.76146	8.01996		9.58458		11.475	10.6281	8.25778	8.59798
				10.9644		7.76306	8.02667		9.59033		11.4795	10.6365	8.26074	8.59981
				10.9861		7.76372	8.0278		9.59389		11.482	10.647	8.26371	8.60758
				11.0075		7.76723	8.02904		9.59931		11.4863	10.67	8.26547	8.61093
				11.0225		7.76885	8.03301		9.6037		11.4886	10.7133	8.27754	8.61176
				11.0244		7.77308	8.03421		9.60669		11.5003	10.7137	8.27766	8.61249
				11.0464		7.77336	8.0356		9.62572		11.5007	10.7378	8.29181	8.61579
				11.0908		7.78187	8.03658		9.64069		11.5162	10.7549	8.29294	8.62446
				11.1347		7.78221	8.04142		9.6511		11.5444	10.7555	8.29377	8.62602
				11.1419		7.78744	8.0415		9.65231		11.5485	10.7662	8.29506	8.62693
				11.1456		7.79285	8.04764		9.65888		11.55	10.7762	8.29685	8.63132
				11.3643		7.80096	8.05013		9.66319		11.5521	10.7862	8.29757	8.63443
				11.3852		7.80744	8.05263		9.66651		11.5557	10.801	8.30132	8.63889
				11.412		7.81635	8.05479		9.69076		11.5601	10.8097	8.3032	8.64177
				11.4167		7.81673	8.05589		9.6921		11.5823	10.8165	8.30545	8.66049
				11.6061		7.81882	8.07207		9.69388		11.5924	10.826	8.31442	8.66336
				11.6108		7.82045	8.07261		9.69445		11.5973	10.8287	8.31954	8.66947
				12.0375		7.82163	8.075		9.70398		11.6106	10.8316	8.33061	8.67195
				12.0521		7.82639	8.07572		9.71028		11.6108	10.8319	8.33354	8.67297
				12.1398		7.82754	8.07651		9.71618		11.6207	10.8368	8.3353	8.67558
				12.1754		7.82968	8.07848		9.71643		11.6215	10.8461	8.33926	8.67672
				12.8325		7.83283	8.08217		9.72729		11.6255	10.848	8.34032	8.68029
				14.1234		7.84062	8.08387		9.72788		11.6367	10.8755	8.34123	8.68086
				14.9909		7.84411	8.09206		9.73804		11.646	10.8924	8.34329	8.68182
				16.7745		7.85137	8.09608		9.73868		11.6482	10.8931	8.34414	8.68368
				16.8191		7.85603	8.1073		9.74372		11.6672	10.8974	8.34591	8.68446
						7.86577	8.11844		9.74619		11.6712	10.902	8.34629	8.6853
						7.87041	8.11943		9.75235		11.6798	10.9301	8.34638	8.6882
						7.87397	8.11984		9.7566		11.6799	10.9345	8.35069	8.69455
						7.88322	8.12266		9.75953		11.6803	10.9359	8.3522	8.70161
						7.88617	8.12468		9.77135		11.6806	10.937	8.35292	8.72093
						7.88676	8.13017		9.77252		11.6859	10.9436	8.35811	8.7214
						7.89858	8.13397		9.77493		11.7005	10.9438	8.36072	8.72167
						7.91253	8.14515		9.77604		11.7095	10.9526	8.37379	8.72187
						7.91499	8.14524		9.77623		11.7266	10.9546	8.38294	8.72926
						7.91854	8.14737		9.77686		11.7359	10.9626	8.38302	8.73172
						7.92103	8.14997		9.78206		11.7469	10.965	8.38363	8.73344
						7.92297	8.15193		9.7821		11.7492	10.9723	8.38525	8.74648
						7.929	8.15193		9.78577		11.7598	10.9745	8.38686	8.74916
						7.93723	8.15465		9.78789		11.7822	10.9818	8.38973	8.75118
						7.94957	8.15612		9.78849		11.7895	10.9953	8.39745	8.76163
						7.95603	8.16071		9.79125		11.7935	10.9985	8.4009	8.7724
						7.95625	8.16689		9.79479		11.7981	11.0046	8.40861	8.77248
						7.95697	8.17116		9.81134		11.8081	11.0161	8.4092	8.77707
						7.95826	8.17353		9.83345		11.8123	11.0226	8.41244	8.77958
						7.95985	8.17401		9.83525		11.8127	11.0616	8.4139	8.78156
						7.96337	8.17704		9.84316		11.8362	11.0665	8.41863	8.78357
						7.96681	8.17771		9.84799		11.841	11.0681	8.42079	8.78506
						7.97136	8.18085		9.851		11.8641	11.0762	8.43048	8.78581
						7.97408	8.18523		9.85743		11.8682	11.0851	8.43054	8.78833
						7.97509	8.18896		9.86076		11.8773	11.1065	8.43957	8.7913
						7.97781	8.19458		9.86363		11.8958	11.1256	8.43972	8.79371
						7.99117	8.19535		9.8702		11.9063	11.1443	8.44421	8.79846
						7.99558	8.1982		9.87292		11.908	11.145	8.45399	8.79983
						8.01105	8.20582		9.88246		11.9093	11.1507	8.45572	8.80139
						8.01318	8.20797		9.88753		11.9152	11.1578	8.47058	8.80356
						8.02671	8.20992		9.88902		11.9182	11.1749	8.47198	8.80507
						8.0277	8.21357		9.93152		11.9241	11.1947	8.47721	8.80584
						8.02991	8.21363		9.93309		11.9312	11.2207	8.47829	8.80819
						8.03117	8.21682		9.94088		11.9391	11.2375	8.47942	8.81025
						8.03418	8.21741		9.97646		11.9405	11.2655	8.48179	8.81558
						8.04049	8.22112		9.98024		11.9692	11.2681	8.48197	8.81962
						8.04475	8.22254		9.98537		11.9833	11.2833	8.49325	8.82331
						8.04602	8.22609		9.98811		12.002	11.2841	8.49587	8.82421
						8.05395	8.2283		9.99134		12.0038	11.2891	8.51353	8.83505
						8.07105	8.22986		9.99814		12.0151	11.2973	8.51521	8.85431
						8.07283	8.23495		10.0015		12.0247	11.3204	8.5229	8.85569
						8.07336	8.2377		10.0201		12.0284	11.3267	8.53435	8.866
						8.08449	8.23999		10.0205		12.0309	11.3357	8.53484	8.86765
						8.09614	8.2416		10.0261		12.0328	11.3542	8.53623	8.86969
						8.10024	8.24235		10.0268		12.0825	11.3574	8.53806	8.87518
						8.1004	8.24411		10.0326		12.0894	11.3657	8.54036	8.87836
						8.1014	8.24658		10.0327		12.0935	11.373	8.54139	8.88504
						8.10762	8.24771		10.0357		12.1286	11.3767	8.54763	8.88905
						8.10873	8.2562		10.0519		12.1399	11.3876	8.54875	8.89377
						8.11505	8.25949		10.0525		12.1403	11.4029	8.55075	8.89581
						8.11512	8.26316		10.0554		12.143	11.4101	8.55808	8.90078
						8.11672	8.26705		10.0581		12.1534	11.4102	8.56124	8.912
						8.12518	8.27391		10.0684		12.1637	11.4124	8.56221	8.91702
						8.13592	8.27835		10.0738		12.1757	11.4335	8.5662	8.91756
						8.15627	8.28528		10.0766		12.1924	11.4346	8.57112	8.92515
						8.16181	8.28575		10.094		12.1949	11.4626	8.57431	8.92587
						8.16382	8.28906		10.1004		12.2068	11.4693	8.57511	8.93922
						8.16412	8.2894		10.1062		12.2086	11.4802	8.58033	8.93963
						8.16441	8.29368		10.1222		12.2156	11.4826	8.5846	8.9421
						8.16555	8.29565		10.1321		12.2363	11.4854	8.58896	8.95334
						8.16928	8.29739		10.1341		12.2399	11.4989	8.5913	8.95342
						8.17029	8.30498		10.1402		12.2738	11.4996	8.59367	8.96296
						8.17266	8.31318		10.1481		12.284	11.5001	8.59825	8.98341
						8.17354	8.31497		10.1618		12.2908	11.5247	8.60013	8.99704
						8.1771	8.31625		10.1678		12.2949	11.526	8.60153	8.99796
						8.17959	8.32591		10.198		12.3016	11.5318	8.60576	8.99895
						8.18468	8.33288		10.2072		12.306	11.5338	8.60898	9.00162
						8.18844	8.33701		10.2367		12.3117	11.5352	8.61262	9.00571
						8.18923	8.33941		10.2531		12.3136	11.5415	8.61634	9.00604
						8.19429	8.34648		10.2592		12.3306	11.5441	8.63248	9.01256
						8.19666	8.34683		10.2595		12.3815	11.5484	8.63335	9.0149
						8.20245	8.34811		10.2606		12.3855	11.5524	8.63414	9.02436
						8.20303	8.34919		10.2616		12.3858	11.5538	8.63452	9.02634
						8.20461	8.35207		10.2857		12.3914	11.5597	8.63502	9.02674
						8.20724	8.35259		10.2961		12.3935	11.5679	8.6375	9.03084
						8.20777	8.35262		10.2988		12.4025	11.5773	8.63935	9.03734
						8.2094	8.36291		10.3128		12.4148	11.5839	8.64042	9.04234
						8.21135	8.36826		10.3279		12.4443	11.6068	8.65513	9.04482
						8.21191	8.36853		10.3351		12.4592	11.6108	8.65567	9.04894
						8.21212	8.36926		10.3466		12.4596	11.6131	8.66125	9.05839
						8.21379	8.37116		10.3524		12.4709	11.6186	8.66315	9.06252
						8.21943	8.37257		10.3559		12.4908	11.6312	8.67279	9.06331
						8.22398	8.37529		10.3582		12.5063	11.6468	8.6855	9.06463
						8.22537	8.37568		10.3596		12.5235	11.6486	8.68667	9.06844
						8.22598	8.37767		10.3598		12.5371	11.6584	8.69025	9.07304
						8.22664	8.38528		10.3608		12.539	11.6614	8.70087	9.07314
						8.22975	8.39233		10.3636		12.5713	11.6644	8.70092	9.07319
						8.23028	8.39674		10.4124		12.5995	11.6731	8.71422	9.07824
						8.23589	8.40101		10.4201		12.6017	11.6803	8.71746	9.07989
						8.23609	8.41254		10.4377		12.647	11.6972	8.72191	9.08189
						8.2363	8.41358		10.4455		12.6537	11.7782	8.72793	9.08502
						8.23894	8.4186		10.4506		12.6538	11.7873	8.73223	9.1002
						8.24371	8.42267		10.4538		12.6538	11.7987	8.7329	9.11027
						8.24528	8.43057		10.4913		12.6564	11.8107	8.73375	9.1164
						8.24784	8.43269		10.501		12.6591	11.8483	8.73497	9.11726
						8.26066	8.43823		10.502		12.685	11.895	8.73498	9.11823
						8.26185	8.44605		10.5039		12.7013	11.9355	8.73569	9.12464
						8.26264	8.44944		10.5109		12.7172	11.9509	8.7388	9.12654
						8.26783	8.45515		10.52		12.7251	11.9595	8.74373	9.12965
						8.26796	8.45834		10.5218		12.729	11.9816	8.75651	9.12996
						8.27264	8.46292		10.5633		12.7308	11.9849	8.75829	9.13013
						8.27685	8.46679		10.5744		12.7506	12.0062	8.76073	9.13055
						8.27738	8.47478		10.5853		12.756	12.0124	8.76398	9.131
						8.28648	8.48182		10.5862		12.7811	12.0336	8.76756	9.1313
						8.28968	8.48369		10.5866		12.7826	12.0372	8.77459	9.13174
						8.29723	8.48615		10.6179		12.8141	12.0637	8.77577	9.13725
						8.29949	8.48941		10.6209		12.8289	12.068	8.78386	9.13808
						8.30517	8.49078		10.635		12.8865	12.0682	8.78993	9.13881
						8.30738	8.49392		10.6432		12.9051	12.0848	8.7903	9.14038
						8.30948	8.49685		10.6433		12.9096	12.0937	8.79109	9.14505
						8.31018	8.50408		10.6887		12.9226	12.1048	8.79944	9.14783
						8.31317	8.52806		10.6894		12.9461	12.1273	8.8043	9.15458
						8.31563	8.5311		10.7061		12.9488	12.1498	8.80531	9.15643
						8.32025	8.53579		10.7115		12.9532	12.1962	8.8079	9.16043
						8.32228	8.53621		10.7177		12.9592	12.2756	8.81084	9.16644
						8.33468	8.53889		10.7185		12.9685	12.2797	8.81574	9.17923
						8.33704	8.53964		10.7439		12.9844	12.3257	8.82578	9.18505
						8.34792	8.54686		10.7541		13.0296	12.3577	8.82904	9.18821
						8.35012	8.54859		10.7636		13.0328	12.3652	8.8343	9.19033
						8.35546	8.55161		10.7693		13.0491	12.3894	8.83598	9.20122
						8.36295	8.55706		10.7757		13.1056	12.3958	8.84085	9.21074
						8.3637	8.55782		10.781		13.1094	12.4497	8.84658	9.21164
						8.3663	8.55911		10.7887		13.1603	12.4549	8.85359	9.21378
						8.36786	8.56234		10.7926		13.1706	12.4693	8.85835	9.21598
						8.36897	8.56267		10.793		13.1844	12.481	8.88124	9.218
						8.37013	8.57841		10.8138		13.1919	12.5059	8.88518	9.2197
						8.37551	8.58349		10.8352		13.2341	12.5179	8.89933	9.22094
						8.3778	8.59394		10.862		13.2762	12.5209	8.89967	9.22334
						8.38602	8.59415		10.8708		13.2944	12.5226	8.90261	9.22609
						8.38985	8.59533		10.8997		13.2979	12.5321	8.91583	9.22721
						8.39345	8.59995		10.8998		13.3484	12.5587	8.92152	9.23425
						8.39646	8.60766		10.9167		13.4075	12.5744	8.92439	9.23725
						8.40217	8.61065		10.969		13.4317	12.6301	8.92748	9.23736
						8.40624	8.61781		11.0033		13.4562	12.6354	8.93369	9.24205
						8.41011	8.62		11.0099		13.5522	12.6427	8.93405	9.25984
						8.41118	8.62252		11.0535		13.5939	12.6665	8.93684	9.2643
						8.41136	8.6236		11.0881		13.5961	12.6981	8.94011	9.26853
						8.4235	8.62386		11.0975		13.6249	12.7117	8.94067	9.26944
						8.42449	8.62821		11.0991		13.645	12.7243	8.94081	9.27457
						8.42833	8.6294		11.1128		13.6518	12.7638	8.94713	9.2797
						8.43077	8.63439		11.1289		13.6658	12.7641	8.94735	9.2915
						8.43539	8.63544		11.153		13.68	12.7723	8.94973	9.29151
						8.44131	8.63835		11.1582		13.6968	12.7761	8.95611	9.29318
						8.44581	8.65427		11.1634		13.7133	12.7873	8.97833	9.29521
						8.44676	8.65646		11.1911		13.7173	12.7981	9.00831	9.29864
						8.45182	8.66471		11.2018		13.7537	12.8363	9.0104	9.30406
						8.45635	8.66828		11.2126		13.7769	12.848	9.0185	9.30608
						8.4597	8.66869		11.2218		13.8897	12.8586	9.05003	9.30919
						8.46725	8.67002		11.2249		13.9841	12.8848	9.05292	9.31391
						8.47163	8.68035		11.2526		14.0058	12.9228	9.05867	9.32028
						8.4718	8.68074		11.2592		14.0506	12.9858	9.06716	9.32303
						8.47613	8.68119		11.2601		14.142	12.9911	9.0675	9.32433
						8.47654	8.68166		11.2646		14.2098	13.0016	9.08143	9.32463
						8.47655	8.68574		11.2648		14.2564	13.0228	9.08222	9.33438
						8.47714	8.68628		11.2837		14.2869	13.0308	9.09099	9.3347
						8.47911	8.70109		11.2894		14.3388	13.0327	9.09116	9.3376
						8.4821	8.70878		11.308		14.3486	13.039	9.0961	9.34145
						8.4832	8.71641		11.323		14.3546	13.0416	9.11988	9.34241
						8.4833	8.72004		11.3369		14.4762	13.065	9.12762	9.35474
						8.48951	8.72145		11.3786		14.5223	13.0829	9.13003	9.36092
						8.49124	8.72201		11.4064		14.5814	13.0914	9.1352	9.36363
						8.49382	8.72401		11.4229		14.9289	13.1427	9.13577	9.36992
						8.49683	8.72945		11.4472		14.9349	13.2006	9.13582	9.37007
						8.4995	8.73037		11.4516		15.0896	13.3436	9.13801	9.37491
						8.50087	8.734		11.4767		15.1155	13.3682	9.14057	9.38154
						8.50521	8.7381		11.4881		15.126	13.4181	9.14094	9.3849
						8.50661	8.74247		11.5444		15.2531	13.4796	9.16442	9.38513
						8.51229	8.75154		11.6503		15.3211	13.4934	9.17437	9.38556
						8.5123	8.75312		11.6891		15.3229	13.6074	9.18355	9.39055
						8.51394	8.75729		11.7281		15.4918	13.6374	9.19656	9.39282
						8.51567	8.75741		11.7816		15.5797	13.6405	9.19975	9.40227
						8.52631	8.76368		11.7963		15.5893	13.6717	9.20047	9.41593
						8.5326	8.76898		11.9243		15.6029	13.699	9.20403	9.42491
						8.53352	8.77271		12.0109		15.6638	13.7559	9.20956	9.43163
						8.54097	8.78016		12.1912		15.7199	13.7665	9.22322	9.43933
						8.54484	8.7811		12.3787		15.7912	13.8096	9.22732	9.4401
						8.54583	8.79675		12.4566		15.7971	13.8535	9.23108	9.44098
						8.54628	8.80023		12.4903		15.841	13.8724	9.23332	9.44194
						8.54688	8.80283		12.5029		15.8614	13.9233	9.24775	9.4506
						8.55188	8.80867		12.5046		15.942	13.9485	9.25419	9.4602
						8.5535	8.8127		12.5629		15.9459	14.0656	9.26419	9.46053
						8.5542	8.81503		12.5809		16.0047	14.071	9.27172	9.46993
						8.55534	8.82165		12.8462		16.0339	14.147	9.27372	9.47227
						8.56809	8.83859		13.0791		16.1569	14.2369	9.28362	9.47323
						8.57062	8.85129		13.1145		16.2392	14.4084	9.29853	9.47782
						8.57085	8.85692		13.1536		16.38	14.4402	9.30421	9.47782
						8.57085	8.8573		13.3789		16.4589	14.5026	9.30669	9.48154
						8.57086	8.8608		13.5459		16.5415	14.5451	9.3174	9.49036
						8.5744	8.86099		14.2007		16.737	14.7289	9.32529	9.4917
						8.57763	8.86431		14.2794		16.7978	14.7312	9.33893	9.49718
						8.58199	8.86651		14.2925		16.9283	14.963	9.34384	9.5046
						8.58305	8.86806		14.5202		16.9635	14.9954	9.35362	9.51624
						8.58494	8.87024		14.533		17.1048	15.1544	9.35463	9.52068
						8.58918	8.87814		14.704		17.25	15.2393	9.35875	9.52373
						8.59505	8.91638		14.771		17.3144	15.2759	9.36183	9.52709
						8.59866	8.91699		15.2314		17.4263	15.3139	9.37227	9.5279
						8.60436	8.9198		15.2583		17.5302	15.5758	9.37719	9.52791
						8.60514	8.92125		15.3861		17.584	15.8676	9.38677	9.5332
						8.60694	8.92813		15.5089		17.5919	15.8909	9.39431	9.53538
						8.60906	8.93021		15.5616		17.6214	16.3522	9.39837	9.53592
						8.61375	8.94031		16.0019		17.8165	16.3681	9.39868	9.53807
						8.62472	8.94665		16.7654		17.9621	16.6498	9.40102	9.54076
						8.6273	8.94889		16.8805		18.0391	16.6714	9.41123	9.54467
						8.62999	8.94955		17.0004		18.0397	16.7901	9.41188	9.54506
						8.63145	8.95536		17.0826		18.0748	16.8023	9.41516	9.54579
						8.63155	8.95988		17.2363		18.4361	16.8156	9.41864	9.54895
						8.63631	8.96111		17.4722		18.5407	16.8296	9.43712	9.54909
						8.63663	8.96187				18.6813	16.9589	9.43797	9.56476
						8.64157	8.96322				18.9086	17.0836	9.44105	9.56507
						8.65056	8.96544				19.0259	17.3446	9.4446	9.58379
						8.65533	8.98504				19.6605	17.4098	9.44817	9.58452
						8.65915	8.99259				19.6829	17.5274	9.45021	9.5884
						8.66069	8.99292				19.8753	17.5523	9.45422	9.58889
						8.66111	9.00819				19.9865	17.7048	9.45792	9.58951
						8.66491	9.0148				20.1418	17.7413	9.46159	9.60006
						8.66723	9.0238				20.3291	18.4325	9.46802	9.60597
						8.66729	9.02602				20.6051	18.5312	9.47367	9.61296
						8.674	9.03988				20.6342	18.6307	9.48651	9.61971
						8.67559	9.0596				20.8939	18.753	9.4932	9.64537
						8.67902	9.06337				21.3949	18.8644	9.51294	9.65417
						8.67951	9.08121				21.9254	19.1535	9.51357	9.65461
						8.68343	9.08746				22.1253	19.4172	9.51609	9.65682
						8.68845	9.10533				22.1405	19.5121	9.51619	9.66562
						8.68887	9.12717				23.496	19.5136	9.52764	9.66782
						8.69111	9.1286				23.5713	19.6407	9.52815	9.6699
						8.69974	9.13701				23.5725	19.711	9.53048	9.67457
						8.70837	9.13915				25.0646	21.8033	9.57435	9.67708
						8.72426	9.1416				25.4918	22.415	9.58643	9.68458
						8.72684	9.14449				25.863	22.652	9.58999	9.68845
						8.72841	9.15053				26.9941	23.9784	9.59447	9.70015
						8.73341	9.15171				28.237	24.2277	9.5955	9.70518
						8.73394	9.15376				28.9548		9.60266	9.70831
						8.73593	9.15776				30.6454		9.61205	9.7123
						8.74098	9.15862				32.0385		9.61542	9.71418
						8.74126	9.16447						9.62456	9.7245
						8.74375	9.16855						9.62546	9.73333
						8.74417	9.18679						9.62716	9.73555
						8.7453	9.19582						9.64071	9.73858
						8.75057	9.19921						9.6446	9.74802
						8.75421	9.20267						9.65155	9.76191
						8.75702	9.20842						9.65226	9.76404
						8.75756	9.21444						9.65759	9.76455
						8.76322	9.23257						9.66078	9.77279
						8.76417	9.23329						9.66439	9.78837
						8.77432	9.24332						9.69931	9.79298
						8.77549	9.24424						9.70875	9.79677
						8.77826	9.2481						9.71216	9.80269
						8.77879	9.2486						9.71527	9.80426
						8.7818	9.25704						9.72142	9.80517
						8.78827	9.26608						9.7255	9.80678
						8.79754	9.26699						9.74567	9.80759
						8.80096	9.2736						9.75071	9.83221
						8.80309	9.27555						9.75258	9.83765
						8.80615	9.27687						9.7565	9.83988
						8.82811	9.29082						9.76529	9.84869
						8.83887	9.30514						9.77559	9.85233
						8.8602	9.30885						9.77651	9.85499
						8.86403	9.31809						9.77735	9.8607
						8.86646	9.32495						9.77748	9.86094
						8.86764	9.32843						9.78811	9.86884
						8.86908	9.33656						9.79303	9.88218
						8.87035	9.34301						9.83027	9.90895
						8.87224	9.34305						9.83302	9.91072
						8.88637	9.34724						9.83586	9.91622
						8.8881	9.36592						9.86221	9.92077
						8.89025	9.36967						9.86366	9.92242
						8.89983	9.38907						9.86763	9.9284
						8.90031	9.39006						9.86774	9.92903
						8.90667	9.39205						9.87339	9.9371
						8.91741	9.39755						9.88301	9.94763
						8.91956	9.3979						9.91259	9.95913
						8.92355	9.40323						9.91477	9.96083
						8.92528	9.40421						9.92453	9.96391
						8.93055	9.40648						9.94971	9.96974
						8.93173	9.41302						9.95266	9.97033
						8.93724	9.41451						9.95979	9.97148
						8.93814	9.42123						9.96018	9.99229
						8.93949	9.42708						9.96041	10.007
						8.94583	9.4507						9.9644	10.0081
						8.96065	9.46054						9.98095	10.011
						8.97249	9.46199						9.99295	10.0179
						8.98407	9.46657						10.0042	10.0251
						8.98658	9.47917						10.0155	10.0287
						8.98704	9.50178						10.0171	10.0301
						8.98967	9.50259						10.0236	10.0346
						8.9954	9.51399						10.0275	10.0406
						8.99872	9.52194						10.0294	10.041
						9.01491	9.52353						10.0326	10.0499
						9.01578	9.53005						10.0327	10.0499
						9.01757	9.53725						10.0388	10.0505
						9.01898	9.54053						10.0578	10.0551
						9.02561	9.55175						10.0617	10.0556
						9.02627	9.55317						10.0642	10.0807
						9.0264	9.55604						10.0698	10.1012
						9.03075	9.55654						10.0991	10.1042
						9.04106	9.5693						10.1069	10.1046
						9.04304	9.58013						10.1243	10.1063
						9.04559	9.584						10.1408	10.1067
						9.04578	9.58615						10.1471	10.108
						9.05394	9.59724						10.1546	10.1107
						9.05752	9.60098						10.1677	10.1197
						9.05917	9.61739						10.1737	10.1499
						9.06099	9.62703						10.1749	10.1608
						9.06525	9.63585						10.1768	10.1733
						9.07092	9.65978						10.1832	10.1787
						9.07731	9.66192						10.1859	10.1795
						9.07885	9.67109						10.1893	10.1849
						9.08136	9.71468						10.1922	10.1959
						9.0821	9.71994						10.2057	10.2149
						9.08495	9.72091						10.2081	10.2172
						9.08808	9.72427						10.2388	10.2212
						9.09379	9.73247						10.25	10.2327
						9.0948	9.73671						10.2821	10.2368
						9.09948	9.73912						10.2843	10.2443
						9.10283	9.74133						10.2874	10.2457
						9.11584	9.74899						10.2965	10.2499
						9.12252	9.76174						10.3021	10.2521
						9.12872	9.77815						10.3227	10.2522
						9.14118	9.79355						10.3255	10.2528
						9.14136	9.8198						10.3445	10.2673
						9.14176	9.8336						10.3722	10.2793
						9.14529	9.83979						10.3795	10.2853
						9.14631	9.88722						10.3868	10.2883
						9.14705	9.90317						10.4288	10.2917
						9.1559	9.90663						10.4344	10.2985
						9.1563	9.93981						10.4489	10.2994
						9.15719	9.96128						10.4566	10.3122
						9.16437	9.96348						10.498	10.3127
						9.17784	9.97246						10.5032	10.3152
						9.18093	9.98091						10.5033	10.3163
						9.18173	9.98332						10.5062	10.317
						9.18328	10.0298						10.5068	10.3224
						9.18921	10.0382						10.5102	10.3317
						9.19501	10.0477						10.517	10.3486
						9.20518	10.0642						10.5246	10.3489
						9.20619	10.0998						10.5268	10.3611
						9.20675	10.1031						10.5602	10.3618
						9.20992	10.1179						10.5608	10.3618
						9.21582	10.12						10.5746	10.3703
						9.2178	10.1205						10.6351	10.3751
						9.21954	10.1391						10.6425	10.3763
						9.22101	10.1666						10.6562	10.3834
						9.22329	10.2097						10.6744	10.3837
						9.22677	10.2674						10.732	10.3859
						9.25678	10.297						10.7368	10.3933
						9.26234	10.3031						10.7475	10.3951
						9.27047	10.3659						10.7569	10.4065
						9.28149	10.381						10.7914	10.4186
						9.29265	10.4139						10.7935	10.4352
						9.29379	10.4322						10.8004	10.4392
						9.29916	10.4322						10.8147	10.4407
						9.3072	10.4737						10.8447	10.4424
						9.30764	10.556						10.9021	10.4489
						9.30836	10.612						10.9107	10.4699
						9.31681	10.6232						10.9143	10.491
						9.3256	10.63						10.9172	10.4969
						9.33141	10.6422						10.9334	10.4969
						9.33202	10.6465						10.9345	10.5082
						9.33625	10.7005						10.9458	10.5166
						9.3388	10.7282						10.9513	10.5323
						9.33999	10.7432						10.954	10.5497
						9.34287	10.775						10.9699	10.5554
						9.34526	10.8022						10.9757	10.5575
						9.34952	10.8201						10.9803	10.5576
						9.37504	10.8743						10.9839	10.5591
						9.38139	10.878						11.0153	10.5595
						9.385	10.9029						11.0855	10.5621
						9.39504	10.9042						11.127	10.5653
						9.397	10.9245						11.1437	10.5654
						9.39769	10.9484						11.1614	10.5786
						9.3985	11.0056						11.2058	10.6108
						9.40168	11.0152						11.2092	10.6135
						9.40398	11.0364						11.2136	10.6161
						9.41048	11.0892						11.2138	10.6331
						9.41161	11.1552						11.2245	10.6349
						9.41902	11.3384						11.2359	10.6356
						9.42195	11.426						11.2533	10.6483
						9.43092	11.4723						11.2554	10.6533
						9.43544	11.7395						11.271	10.6534
						9.4369	11.905						11.2716	10.6566
						9.44298	12.2861						11.2851	10.6714
						9.44728	12.3796						11.3092	10.672
						9.4473	12.4259						11.3166	10.6723
						9.44773	12.8006						11.3514	10.6804
						9.45044	12.8775						11.3641	10.6817
						9.45371	13.5694						11.3649	10.6859
						9.45515	13.8063						11.3966	10.694
						9.4559	13.8171						11.4328	10.7147
						9.45598	14.9279						11.4344	10.7148
						9.45714	15.3832						11.436	10.7156
						9.4594	15.9603						11.6228	10.7209
						9.45987	16.023						11.6292	10.746
						9.46315	16.0941						11.651	10.7572
						9.46825							11.6694	10.7577
						9.46993							11.6987	10.759
						9.47086							11.7633	10.7601
						9.47421							11.7669	10.79
						9.49719							11.7862	10.7963
						9.51262							11.7965	10.8195
						9.51651							11.8441	10.8319
						9.52085							11.8466	10.8335
						9.52412							12.0467	10.8358
						9.53323							12.1079	10.8414
						9.5436							12.1869	10.842
						9.54564							12.204	10.8472
						9.5506							12.3002	10.8637
						9.55145							12.3296	10.8739
						9.56963							12.3334	10.8804
						9.57239							12.4789	10.8846
						9.59362							12.689	10.9033
						9.59533							13.5649	10.9069
						9.59703							13.825	10.9326
						9.61178							13.8872	10.9407
						9.62492							14.5955	10.944
						9.63665							14.7767	10.9659
						9.64167							14.7772	10.9742
						9.64591							15.0597	10.9993
						9.6539							15.2973	11.003
						9.66465							15.3989	11.0343
						9.67039							15.5264	11.0596
						9.68274							16.1503	11.0843
						9.6895							16.6539	11.0877
						9.69573							17.6419	11.1037
						9.69763							18.0661	11.1049
						9.699								11.1094
						9.70453								11.1314
						9.70972								11.1498
						9.71037								11.1573
						9.73575								11.1609
						9.7358								11.1682
						9.74288								11.1936
						9.76536								11.1964
						9.77294								11.2122
						9.77841								11.2132
						9.78107								11.2157
						9.78372								11.2246
						9.78423								11.2278
						9.795								11.2294
						9.79573								11.2422
						9.81604								11.2585
						9.81875								11.2719
						9.8219								11.272
						9.82368								11.2739
						9.83244								11.2773
						9.83531								11.2852
						9.84077								11.2897
						9.84131								11.302
						9.84717								11.3237
						9.86205								11.3411
						9.86269								11.3569
						9.871								11.3925
						9.87765								11.4134
						9.88839								11.4694
						9.89886								11.474
						9.89893								11.4761
						9.90053								11.4767
						9.91347								11.4792
						9.91371								11.4962
						9.9202								11.5257
						9.92251								11.5358
						9.92725								11.537
						9.92784								11.6233
						9.94056								11.6834
						9.95719								11.7131
						9.97042								11.7504
						10.0038								11.8232
						10.0069								11.8341
						10.0174								11.863
						10.0198								11.9241
						10.0365								11.9651
						10.0383								12.0388
						10.0492								12.2158
						10.0493								12.2505
						10.0512								12.3348
						10.0752								12.4206
						10.0904								12.4444
						10.0932								12.4847
						10.096								12.5179
						10.1023								12.5641
						10.104								12.5856
						10.109								12.9766
						10.121								13.0764
						10.1278								13.2661
						10.1555								13.2682
						10.1579								13.4969
						10.1675								13.5786
						10.1764								13.9136
						10.1884								14.1116
						10.2041								14.2559
						10.224								14.4862
						10.2244								14.5451
						10.2371								15.3625
						10.2426								15.6205
						10.2484								17.5845
						10.2515								17.8151
						10.2653								17.9264
						10.2749
						10.2848
						10.3064
						10.3262
						10.346
						10.3461
						10.3477
						10.356
						10.3818
						10.3825
						10.3835
						10.3861
						10.3997
						10.4104
						10.4221
						10.4272
						10.4404
						10.4449
						10.4585
						10.4919
						10.517
						10.5594
						10.5799
						10.5825
						10.5845
						10.6117
						10.6416
						10.6709
						10.6979
						10.7153
						10.7328
						10.7542
						10.7643
						10.7705
						10.8077
						10.8151
						10.8193
						10.8315
						10.8738
						10.8807
						10.8826
						10.9023
						10.9087
						10.9121
						10.9711
						10.9737
						10.9763
						11.0003
						11.0223
						11.0375
						11.0439
						11.056
						11.0626
						11.0777
						11.0925
						11.0955
						11.1646
						11.1817
						11.2038
						11.2316
						11.2484
						11.2578
						11.2783
						11.3042
						11.334
						11.3466
						11.3516
						11.3544
						11.3577
						11.3776
						11.4084
						11.425
						11.4479
						11.4692
						11.4874
						11.4934
						11.5217
						11.5246
						11.5453
						11.6001
						11.6512
						11.6583
						11.7391
						11.7773
						11.8446
						12.0571
						12.2705
						12.3353
						12.3707
						12.5258
						12.6261
						12.9172
						13.2775
						13.5689
						13.822
						13.891
						13.9467
						14.0049
						14.073
						14.1793
						15.2093
						15.963
						18.2397
						18.3074
						21.4962
[truncated: 12 more columns]
