# Supplementary material for: PomX, a ParA/MinD ATPase activating protein, is a triple regulator of cell division in Myxococcus xanthus
Source: eLife. 2021 Mar 18;10:e66160. doi: 10.7554/eLife.66160 (PMC7993993; doi:10.7554/eLife.66160)
Supplement: Figure 4—figure supplement 1—source data 1. [file elife-66160-fig4-figsupp1-data1.xlsx]

## Sheet: Figure 4_Source data 4
Source data for Figure 4_figure supplement 1A
	upper part									lower part											upper part			lower part
																					Lane			Lane
																					1	Marker		1	Marker
																					2	DK1622		2	DK1622
																					3	SA4223		3	SA4223
																					4	SA4252		4	SA4252
																					5	SA9749		5	SA9744
																					6	SA9750		6	SA9747
																					7	SA9751		7	SA9758
																					8	SA9739		8	SA9741
																					9	SA9740		9	SA9742
																					10	SA9743		10	SA9752
