# Supplementary material for: PomX, a ParA/MinD ATPase activating protein, is a triple regulator of cell division in Myxococcus xanthus
Source: eLife. 2021 Mar 18;10:e66160. doi: 10.7554/eLife.66160 (PMC7993993; doi:10.7554/eLife.66160)
Supplement: Figure 4—figure supplement 1—source data 2. [file elife-66160-fig4-figsupp1-data2.xlsx]

## Sheet: Figure 4_Source data 5
Source data for Figure 4_figure supplement 1C
SA4252														SA7063														SA9752
			on	not on		attached											on	not on		attached											on	not on		attached									SA4252
Picture	Cell	length		midcell	pole/some free Space	mid	pole			colocalized with DAPI	not colocalized with DAPI			Picture	Cell	length		midcell	pole/some free Space	mid	pole			colocalized with DAPI	not colocalized with DAPI			Picture	Cell	length		midcell	pole/some free Space	mid	pole			colocalized with DAPI	not colocalized with DAPI						colocalized with DAPI	not colocalized with DAPI
	2	6.95454	1					n=	246	192	54			1	1	11.1694	1					n=	137	9	128				2	5.27791	1					n=	104	33	71				n=	246	192	54
	3	9.37637	1								between nucleoids	polarly			15	7.74483	1								between nucleoids	polarly		2	1	5.525	1								between nucleoids	polarly						between nucleoids	polarly
	5	5.77437	1								54				24	9.56383	1								11	117			7	27.411	1								18	53						54	0
	6	4.70918	1												26	6.6311	1												2	12.2376	1												SA7063
	7	6.51379	1												8	10.9006	1												4	16.3251	1														colocalized with DAPI	not colocalized with DAPI
	8	8.82805	1												22	7.50659	1												5	8.17786	1												n=	137	9	128
	9	4.98768	1												23	15.3119	1												6	19.9306	1															between nucleoids	polarly
	10	6.53626	1												6	21.0594	1												2	13.4204	1															11	117
	11	8.23033	1											12	1	16.1689	1												4	8.92907	1												SA9752
	12	6.16178	1												17	12.1209		1		1									5	5.46648	1														colocalized with DAPI	not colocalized with DAPI
	13	8.76534	1												7	9.54107		1											12	21.1736	1												n=	104	33	71
	14	6.95384	1												7	10.661		1		1									13	13.5742	1															between nucleoids	polarly
	15	6.92359	1												3	15.6309		1											14	11.2622	1															18	53
	16	7.79211	1												5	10.4		1			1								17	12.5032	1
	17	5.81332	1												4	11.4345		1											20	17.0534	1
	18	6.39119	1												24	14.7363		1		1									21	13.5846	1
	19	6.78295	1												2	13.3753		1										9	1	13.7149	1
	20	6.9917	1												8	18.9993		1		1									2	17.0128	1
	21	7.08827	1												15	22.2748		1											3	4.19086	1
	22	9.16946	1												17	8.08142		1											12	3.48827	1
	23	7.60566	1												2	17.7083			1										16	25.7963	1
	24	7.1171	1												3	9.57919			1	1									13	7.17993	1
	25	6.46149	1												4	17.5015			1										7	14.1704	1
	26	8.51687	1												5	9.21703			1		1							12	1	25.7061	1
	27	6.20851	1												7	6.39648			1										3	19.9534	1
	32	4.93817	1												9	13.8835			1		1								12	8.9224	1
	34	8.04949	1												11	11.0486			1										14	9.2392	1
	35	7.19952	1												12	9.68754			1		1								2	19.0283	1
	36	8.13142	1												13	9.94721			1										3	8.31639	1
	37	8.30231	1												19	12.5035			1										1	10.6332	1
	38	6.56322	1												21	10.0604			1										5	12.0993	1
2	1	6.96559	1												22	11.1566			1										7	10.5825	1
	3	5.12289	1												25	13.4343			1										15	8.28643	1
	4	6.60314	1											2	1	14.1638			1										5	13.2139		1		1
	5	7.95538	1												2	12.2912			1										6	18.2848		1		1
	6	6.55638	1												4	26.7559			1										7	15.2212		1		1
	10	8.25269	1												6	15.1358			1										13	30.4355		1		1
	11	5.84969	1												8	12.3004			1										15	24.7658		1			1
	12	6.25215	1												13	8.58259			1										7	12.5583		1		1
	13	4.71662	1												15	7.45802			1		1								10	4.19489		1		1
	14	7.63077	1											3	1	21.1967			1										11	7.33568		1
	16	8.39185	1												4	12.5137			1										8	20.0821		1		1
	17	6.12603	1												6	14.8703			1										15	25.6059		1
	18	6.47089	1												10	9.96178			1										19	15.8166		1
	19	8.21092	1												12	6.86097			1		1								2	13.8633		1
	20	8.45511	1												13	7.32744			1		1								6	10.8383		1		1
1	1	5.95686	1												15	20.4146			1										2	13.9489		1		1
	3	7.46934	1												16	18.9982			1										8	13.7021		1
	4	7.65693	1												20	17.9129			1		1							14	1	27.57		1		1
	5	7.76415	1											4	1	13.5878			1										2	9.60455		1		1
	7	7.31301	1												2	17.5081			1		1								16	8.62671		1
	8	6.45239	1												4	10.0511			1									1	1	12.1824			1		1
	9	6.17042	1												5	13.3696			1										3	31.7295			1	1
	12	7.29252	1												9	20.8852			1										3	12.6933			1		1
	14	9.00251	1												10	11.0097			1										4	10.9795			1		1
	15	7.47243	1												11	10.1799			1									3	1	16.0007			1
	17	9.57083	1												2	23.4107			1										6	15.7938			1	1
	18	7.13921	1												4	13.4331			1										3	16.4532			1
	19	9.83783	1												6	17.0327			1										8	9.80051			1
	21	7.72557	1												7	15.7051			1										9	7.3095			1		1
	22	8.31753	1												8	26.5141			1		1							5	1	36.9161			1
	3	7.89756	1												2	8.88759			1		1								3	10.5093			1
	4	6.01508	1												3	11.1645			1										3	14.4152			1		1
	5	7.23042	1												4	12.5215			1										5	12.6271			1		1
	6	7.38868	1												5	10.2644			1		1								9	9.72478			1
	7	6.4949	1												6	13.9762			1										14	27.9381			1
	8	8.59107	1												7	25.9657			1	1									3	11.7285			1
	11	7.4072	1												9	14.1517			1										4	16.7559			1		1
	12	18.5045	1												11	18.9848			1										5	7.91768			1		1
	13	5.97887	1												12	11.6346			1										8	17.4332			1
	14	6.16987	1												13	8.67046			1										9	9.97408			1
	15	9.01083	1												14	23.1208			1										15	11.2194			1
	16	5.5643	1												15	32.1253			1										18	13.2296			1		1
	17	5.72352	1												18	10.6601			1										19	14.5303			1
	18	7.2763	1												19	10.3466			1										22	5.72929			1		1
	19	7.78625	1												21	19.6005			1		1								2	19.2522			1
5	1	5.54512	1												24	28.3035			1										4	7.03019			1		1
	3	7.73304	1												25	21.3256			1										4	13.1309			1		1
	4	5.74826	1											7	1	8.98521			1										5	11.9547			1
	6	8.76198	1												3	16.8469			1		1								9	17.5125			1		1
	7	7.74853	1											8	1	22.596			1										10	4.51504			1		1
	9	6.47376	1												2	9.53856			1		1								13	4.35451			1
	10	6.58075	1												3	9.23998			1		1								17	5.93632			1		1
	11	5.9827	1												5	7.79781			1										18	22.5013			1
	12	7.74437	1												6	18.1138			1		1							10	1	6.15489			1
	13	11.8498	1												7	3.12609			1		1								3	13.3554			1		1
	15	9.2158	1												10	11.1072			1										5	21.3829			1
	16	8.7656	1												14	11.9038			1		1								8	6.04146			1
	17	7.4843	1												15	19.2459			1										9	5.40524			1		1
6	1	9.65	1											9	1	16.5097			1										12	17.2989			1
	4	7.4956	1												2	16.0735			1		1								14	5.07081			1		1
	5	5.36336	1												3	10.2834			1									11	1	9.08071			1		1
	6	6.61899	1												5	17.0044			1										5	22.7735			1
	9	8.03535	1												7	6.33603			1		1								8	10.9057			1		1
	14	6.25657	1												8	14.825			1										9	10.0224			1
	15	5.41525	1												9	8.96191			1		1							13	1	10.5159			1		1
	16	7.36651	1												10	26.4541			1		1								4	12.7144			1		1
	17	6.61997	1												12	14.9172			1		1								5	17.997			1		1
	18	5.99498	1												2	9.14354			1	1									11	12.3684			1
	19	9.98891	1												5	13.2774			1										13	9.29156			1
	4	9.2233	1												6	10.3035			1		1								6	27.1122			1		1
	5	9.48046	1												9	11.8036			1										11	2.49129			1
	6	10.034	1												10	21.048			1										12	10.3381			1
	7	5.59359	1												11	16.0418			1										14	7.69705			1		1
	8	5.84709	1												12	16.3008			1		1								2	16.2659
	9	6.90898	1												15	10.8578			1		1								2	5.47688
	10	8.99454	1												16	21.5548			1										3	10.7894
	2	7.54632	1												19	15.791			1										4	13.6516
	3	6.81499	1												20	26.9539			1									4	1	7.90144
	6	8.40562	1												23	16.2098			1										7	26.4142
	7	6.6274	1											11	1	11.3441			1										10	16.1878
	9	8.94627	1												3	22.7476			1									6	1	24.1146
	10	6.29764	1												5	8.63998			1										2	25.7983
	11	6.4582	1												6	8.51499			1		1								4	6.17223
	15	8.20916	1												7	6.96722			1										6	18.9386
9	1	7.9546	1												9	13.6196			1										7	6.46866
	2	8.43261	1												2	12.5608			1										8	10.0756
	3	6.76094	1												3	19.1017			1										10	13.4065
	6	8.31258	1												4	18.7869			1										11	11.4445
	7	10.2554	1												6	12.6463			1										16	6.75018
	9	5.81706	1												7	12.6863			1									7	1	13.1416
	11	7.47206	1												10	12.2198			1										2	20.4376
	12	7.61474	1												12	19.9313			1										6	19.2055
	13	6.00309	1												13	9.5149			1										12	21.863
	14	8.80229	1												14	11.1642			1										16	5.76891
	15	7.25652	1												15	9.47144			1										23	7.06442
	16	5.58754	1												2	8.566			1										24	8.54859
	19	8.57656	1												3	7.36782			1									8	1	12.5403
	20	6.79439	1												4	8.37424			1										3	12.8316
	22	7.91129	1												5	12.0939			1										5	26.7643
	23	6.43009	1												11	24.6419			1										6	5.51007
	3	10.2894	1												12	14.5658			1										7	12.8317
	4	8.77271	1												13	16.1893			1		1								11	7.93426
	5	8.06314	1												14	10.0718			1		1								14	11.56
	7	10.374	1												16	16.7684			1										20	13.663
	8	7.38028	1												19	24.1079			1										2	6.08564
	10	5.55367	1												21	19.2877			1										4	19.2317
	11	11.2863	1												6	8.93574													6	3.89639
	12	6.94774	1												8	7.28268													7	10.2034
	13	8.96426	1												10	19.0619													10	39.1304
	14	7.03155	1												14	17.7868													11	6.56629
	15	7.84183	1												16	11.8089													3	11.8295
	16	10.9836	1												18	12.7148													4	18.9638
	18	8.80676	1												20	5.2974													10	6.15169
	20	10.2341	1												23	6.53759													11	12.2823
	21	8.47353	1												3	13.4284													4	17.4857
	22	8.39619	1												5	16.644													2	8.90006
	23	6.45434	1												9	12.5644													3	11.0056
	24	9.36507	1												10	14.0088													6	12.7874
	25	11.3878	1												11	17.6886													7	27.3216
	26	9.11521	1												12	6.95138													9	10.3708
	27	5.72066	1												14	12.2956													10	16.4728
	28	5.75525	1												16	8.73744													15	8.93836
	30	7.09284	1												2	6.06448													16	17.3842
	31	5.92263	1												3	13.5654													3	12.7108
	32	7.11259	1												5	3.32518													4	18.9982
	33	6.43966	1												7	22.9174													8	10.8269
	34	6.46223	1												8	11.7779													9	20.2254
	2	8.83323	1												9	18.1004													10	23.0276
	3	8.78911	1												11	8.86348													13	13.5227
	4	10.4449	1												14	7.8608													17	19.4196
	5	7.36567	1												17	18.0133													18	8.62286
	6	9.77071	1												18	7.42412
	7	9.72972	1												19	18.0832
	9	5.75901	1												21	8.91399
	10	6.65817	1												3	32.9179
	11	6.76901	1												6	5.85144
	12	8.09832	1											5	1	10.5113
	13	7.21594	1											6	1	11.7346
	14	6.98089	1												8	7.68479
	16	4.89814	1												10	16.5066
	17	4.8936	1												16	6.66021
	18	5.22063	1												17	6.52993
	19	7.25246	1												20	9.55834
	20	7.44718	1												2	12.1788
	21	7.38458	1												4	12.0603
	22	6.43789	1												5	13.94
	23	6.71632	1												4	8.70066
	24	6.68692	1												8	7.97191
	25	6.47656	1												9	10.5405
	26	8.0255	1												11	14.0392
	27	8.64257	1												12	11.0167
	28	8.02461	1												13	19.1415
	29	8.80603	1												6	8.52238
	30	9.54004	1												11	18.1003
	31	7.39419	1											10	1	12.2381
	32	7.25395	1												3	12.7372
	33	5.76872	1												4	6.72944
	34	6.31748	1												7	8.76509
	36	6.97866	1												8	6.32664
	37	6.53258	1												13	10.9371
	4	10.0912		1		1									14	11.7685
	31	8.50149		1											17	14.6093
	33	5.25244		1		1									18	14.5935
	7	8.65033		1		1									21	5.79149
	9	6.17783		1		1									22	10.2741
	15	9.69936		1		1									4	11.5679
	6	9.47672		1		1									10	14.9455
	10	9.58991		1		1									5	11.9163
	11	8.34955		1		1									8	5.948
	13	9.64862		1		1									9	9.67233
	2	10.2239		1		1									11	5.89926
	9	8.39248		1		1								13	1	8.16588
	10	10.596		1		1									6	12.7391
	2	10.5568		1		1									7	5.52454
	5	8.72642		1		1									8	18.6268
	8	8.08302		1		1									9	6.92702
	14	11.5164		1		1									10	8.11446
	2	11.9056		1		1									18	5.59973
	3	8.33813		1		1									20	17.4724
	7	9.5316		1		1
	8	8.87578		1		1
	10	6.93396		1		1
	11	8.39984		1		1
	12	10.215		1		1
7	1	10.9166		1		1
	2	8.37274		1		1
	3	9.58587		1		1
8	1	8.71431		1		1
	4	8.36828		1		1
	5	9.78007		1		1
	8	7.85133		1		1
	12	8.42152		1		1
	13	9.14512		1		1
	14	10.1928		1		1
	4	8.54003		1		1
	5	10.1812		1		1
	8	10.1329		1		1
	10	9.53904		1		1
	17	9.62597		1		1
	18	9.07545		1		1
	21	8.28897		1		1
10	1	10.2381		1		1
	2	10.4104		1		1
	17	10.3297		1		1
	19	10.2496		1		1
	29	9.80745		1		1
11	1	9.2666		1		1
	8	7.90966		1		1
	15	11.1145		1		1
	35	8.53823		1		1
	28	9.92801		1		1
	29	10.3843		1		1
	30	8.79214		1		1
	20	9.59237		1		1
	16	5.02697		1		1
3	1	6.31238
	2	5.06646
	8	5.53829
	2	10.7589
	23	5.46444
4	1	6.5376
	13	8.05294
	16	9.83316
	17	6.74695
	24	6.16892
	6	6.88396
	9	6.24201
count	258	258	191	55	0	54
[truncated: 4 more columns]
