# Supplementary material for: PomX, a ParA/MinD ATPase activating protein, is a triple regulator of cell division in Myxococcus xanthus
Source: eLife. 2021 Mar 18;10:e66160. doi: 10.7554/eLife.66160 (PMC7993993; doi:10.7554/eLife.66160)
Supplement: Figure 4—figure supplement 2—source data 1. [file elife-66160-fig4-figsupp2-data1.xlsx]

## Sheet: Figure 4_Source data 6
Source data Figure 4_figure supplement 2A
											Lane
											1	Marker
											2	DK1622
											3	SA3108
											4	SA3146
											5	SA9720
											6	SA7014
											7	SA8240
											8	SA8268
