# Supplementary material for: PomX, a ParA/MinD ATPase activating protein, is a triple regulator of cell division in Myxococcus xanthus
Source: eLife. 2021 Mar 18;10:e66160. doi: 10.7554/eLife.66160 (PMC7993993; doi:10.7554/eLife.66160)
Supplement: Figure 4—figure supplement 2—source data 2. [file elife-66160-fig4-figsupp2-data2.xlsx]

## Sheet: Figure 4_Source data 7
Source data for Figure 4_figure supplement 2B
											Lane
											1	Marker
											2	DK1622
											3	SA4703
											4	SA4712
											5	SA9721
											6	SA8250
											7	Not relevant
											8	Not relevant
											9	Not relevant
											10	Not relevant
											11	Not relevant
											12	Not relevant
