# Supplementary material for: PomX, a ParA/MinD ATPase activating protein, is a triple regulator of cell division in Myxococcus xanthus
Source: eLife. 2021 Mar 18;10:e66160. doi: 10.7554/eLife.66160 (PMC7993993; doi:10.7554/eLife.66160)
Supplement: Figure 4—source data 1. [file elife-66160-fig4-data1.xlsx]

## Sheet: Figure 4-source data 1
Source data for Figure 4A																		SA9747																	SA9748
											Data	no cluster	off-center	midcell	N=	Nges=												Data	no cluster	off-center	midcell	N=	Nges=												Data	no cluster	off-center	midcell	N=
	SA4252										1	35	158	321	514	1202												1	18	291	112	421	1858												1	46	137	73	256
												6.80934	30.7393	62.4514															4.27553	69.1211	26.6033															17.9688	53.5156	28.5156
	data_set	frame_no	cellid	length	area	width	cluster at	in %	normalized		2	30	102	208	340			data_set	frame_no	cellid	length	area	width	cluster at	in %	normalized		2	51	529	232	812			data_set	frame_no	cellid	length	area	width	cluster at	in %	normalized		2	158	428	199	785
	1	1	281	8.27104	6.66491	0.846539		0	0			8.82353	30	61.1765				1	1	2	12.8632	10.7133	0.860444		0	0			6.28079	65.1478	28.5714				1	1	6	7.66251	6.58579	0.899334		0	0			20.1274	54.5223	25.3503
	1	1	502	6.36213	5.26379	0.875017		0	0		3	22	95	231	348			1	1	26	5.8031	4.80812	0.878721		0	0		3	33	370	222	625			1	1	14	8.31225	6.95846	0.849727		0	0		3	61	159	110	330
	1	1	503	5.72896	4.70611	0.877747		0	0			6.32184	27.2989	66.3793				1	3	8	6.22042	5.42541	0.949957		0	0			5.28	59.2	35.52				1	2	8	4.70234	3.73623	0.858624		0	0			18.4848	48.1818	33.3333
	1	2	3	6.0677	5.18676	0.910355		0	0		Mean	7.31824	29.3461	63.3357				1	3	11	6.78202	5.86625	0.919792		0	0		Mean	5.27877	64.4896	30.2316	100			1	2	9	7.43583	6.32696	0.897634		0	0		Mean	18.8603	52.0732	29.0664	100
	1	3	4	5.95782	5.07445	0.905618		0	0		STDEV	1.32621	1.81105	2.71182				1	4	14	5.51417	4.64429	0.893052		0	0		STDEV	1.00263	4.99321	4.68443				1	2	10	6.07898	5.10203	0.892956		0	0		STDEV	1.12724	3.40745	4.01991
	1	3	35	5.21015	4.14465	0.843414		0	0									1	5	27	6.18913	5.09859	0.883724		0	0									1	2	12	6.02904	4.90227	0.86179		0	0
	1	3	423	6.05116	4.88378	0.847848		0	0									1	6	5	5.40664	4.52017	0.895481		0	0									1	2	13	7.17163	6.1595	0.908881		0	0
	1	4	9	7.70848	6.38628	0.867123		0	0									1	6	184	4.70209	3.77197	0.833227		0	0									1	2	19	5.49723	4.58391	0.893798		0	0
	1	4	10	5.65888	4.79133	0.917463		0	0									1	7	8	5.15398	4.39795	0.919089		0	0									1	2	20	6.02901	5.19339	0.925182		0	0
	1	4	12	6.5839	5.72373	0.917921		0	0									1	8	5	5.35285	4.62649	0.921881		0	0									1	2	22	7.31668	6.29737	0.906576		0	0
	1	5	16	5.25366	4.47243	0.902581		0	0									1	9	4	5.23554	4.3698	0.891681		0	0									1	2	25	7.03968	6.03232	0.904093		0	0
	1	5	17	5.25797	4.50556	0.941202		0	0									1	11	3	5.14459	4.31585	0.911844		0	0									1	2	30	6.84168	5.82868	0.899288		0	0
	1	5	19	6.54151	5.45346	0.881123		0	0									1	12	5	8.14218	6.81389	0.878581		0	0									1	2	31	14.0235	12.3662	0.906425		0	0
	1	6	32	6.14958	5.10917	0.878861		0	0									1	12	25	7.20474	5.90909	0.852139		0	0									1	3	1	6.9673	5.83414	0.888821		0	0
	1	7	12	5.06992	4.3307	0.918622		0	0									1	13	1	5.80302	4.63552	0.854532		0	0									1	3	2	5.23896	4.46097	0.925635		0	0
	1	8	6	9.62017	8.24799	0.867505		0	0									1	14	7	2.20409	1.58342	0.84652		0	0									1	3	5	6.6254	5.50466	0.877171		0	0
	1	9	4	6.77806	5.79914	0.89328		0	0									1	14	8	5.27297	4.50169	0.914825		0	0									1	4	2	16.2069	14.2978	0.905131		0	0
	1	9	6	10.8223	8.89636	0.8389		0	0									1	19	225	11.6023	9.50242	0.834186		0	0									1	4	3	9.40499	8.27798	0.918162		0	0
	1	9	12	6.88543	5.72185	0.889303		0	0									1	10	31	7.12025	5.72422	0.849825	6.84807	96.1773	3.82265									1	4	5	10.4903	9.31383	0.918343		0	0
	1	9	13	12.108	10.8763	0.938971		0	0									1	19	255	24.3396	20.5091	0.856548	1.37395	5.64489	5.64489									1	5	4	6.60818	5.60762	0.896604		0	0
	1	9	448	6.78342	5.73621	0.900002		0	0									1	11	204	22.9845	20.8106	0.925975	1.39211	6.05671	6.05671									1	5	7	5.39832	4.45579	0.868513		0	0
	1	11	5	9.17417	7.9495	0.900477		0	0									1	15	4	14.3181	12.4085	0.902915	13.138	91.7581	8.24193									1	6	23	5.52007	4.61097	0.894419		0	0
	1	12	3	4.60539	3.83929	0.892454		0	0									1	13	3	9.6888	8.47135	0.92141	8.88567	91.7108	8.28924									1	6	27	11.4618	9.61459	0.869064		0	0
	1	12	5	8.40543	6.95998	0.861549		0	0									1	6	239	20.0248	17.7759	0.905292	18.3204	91.4883	8.51167									1	6	29	8.1827	6.79731	0.870963		0	0
	1	12	81	4.41219	3.56486	0.865		0	0									1	1	5	8.61889	7.43285	0.909659	7.84335	91.0019	8.99813									1	6	31	9.59327	8.48137	0.93022		0	0
	1	12	97	4.72996	3.89562	0.900479		0	0									1	10	46	6.19877	4.98778	0.839308	5.63952	90.978	9.02204									1	7	8	6.83942	5.85649	0.909655		0	0
	1	12	125	6.25243	5.18102	0.871698		0	0									1	12	13	10.0584	8.87861	0.929457	0.912245	9.06947	9.06947									1	8	1	5.67752	4.87025	0.910585		0	0
	1	13	475	6.5955	5.65877	0.927835		0	0									1	3	2	8.27102	7.36705	0.945328	7.50853	90.7812	9.21882									1	9	3	11.0585	9.58926	0.908103		0	0
	1	14	3	6.34739	5.31206	0.882372		0	0									1	10	50	6.28075	5.22733	0.878125	5.69779	90.7184	9.28161									1	9	6	6.27281	5.45904	0.937221		0	0
	1	14	15	9.90675	8.31802	0.875655		0	0									1	1	7	5.15142	4.09974	0.847781	0.483877	9.39308	9.39308									1	9	7	5.99014	4.94875	0.87564		0	0
	1	14	29	6.35279	5.05226	0.833093		0	0									1	2	17	7.63149	6.5501	0.91659	6.85249	89.7922	10.2078									1	9	8	4.76188	3.84736	0.870513		0	0
	1	14	69	7.0935	6.01498	0.894899		0	0									1	13	6	4.96574	3.92369	0.870427	4.45095	89.6331	10.3669									1	9	9	5.90527	5.17055	0.940124		0	0
	1	14	481	6.07514	5.0182	0.862749		0	0									1	2	241	22.145	19.1834	0.89332	19.8478	89.6265	10.3735									1	10	1	7.25135	6.4557	0.947369		0	0
	1	14	547	6.2699	5.10799	0.84904		0	0									1	12	15	5.11494	4.16864	0.892256	4.58048	89.551	10.449									1	11	5	8.00966	6.89107	0.917434		0	0
	1	14	550	6.17953	5.09021	0.879611		0	0									1	5	18	5.7984	4.81607	0.870341	5.18226	89.3739	10.6261									1	11	15	5.13857	4.47288	0.936497		0	0
	1	2	514	5.60935	4.65729	0.888457	0.503997	8.98495	8.98495									1	5	244	21.1443	17.5402	0.837847	2.29577	10.8576	10.8576									1	12	3	7.54731	6.64624	0.934972		0	0
	1	12	470	5.59904	4.40388	0.832888	4.926	87.9793	12.0207									1	18	4	17.3197	15.4732	0.919623	1.90166	10.9798	10.9798									1	12	4	7.98945	7.10078	0.943399		0	0
	1	4	7	10.9686	9.02604	0.876925	9.60519	87.5701	12.4299									1	5	54	6.98947	6.05875	0.912311	0.782243	11.1917	11.1917									1	12	10	5.87987	4.88707	0.891655		0	0
	1	14	98	5.34024	4.41344	0.877984	0.727929	13.631	13.631									1	15	13	10.5765	8.43402	0.811811	9.38953	88.7773	11.2227									1	12	13	5.66962	4.85128	0.929367		0	0
	1	12	471	5.83083	4.60932	0.836415	5.00709	85.8727	14.1273									1	6	4	12.314	10.5208	0.88816	1.45908	11.8489	11.8489									1	12	50	8.48393	7.1532	0.891533		0	0
	1	11	15	4.86875	3.99095	0.87314	0.696843	14.3125	14.3125									1	5	30	7.89193	6.83428	0.903963	6.94891	88.0508	11.9492									1	13	2	8.8945	7.81171	0.918235		0	0
	1	1	64	5.43439	4.557	0.890429	4.61956	85.006	14.994									1	1	20	6.24522	5.21092	0.886797	5.46654	87.5316	12.4684									1	14	16	5.91824	5.12546	0.928926		0	0
	1	9	450	5.34341	4.18236	0.80414	4.36548	81.6983	18.3017									1	12	29	12.5103	11.1627	0.920383	1.57334	12.5764	12.5764									1	14	71	5.0602	4.18621	0.89871		0	0
	1	1	314	6.6103	5.41581	0.856663	5.398	81.6604	18.3396									1	16	10	5.02314	4.17124	0.898484	4.36535	86.9048	13.0952									1	15	4	9.61141	8.34145	0.907405		0	0
	1	5	434	9.47447	8.2177	0.917999	1.81789	19.1872	19.1872									1	17	7	9.07846	8.11665	0.916458	7.88218	86.8229	13.1771									1	15	8	9.61276	8.32899	0.902393		0	0
	1	3	7	5.62051	4.65223	0.894922	4.54122	80.7973	19.2027									1	19	65	6.52663	5.32872	0.857677	5.65995	86.7208	13.2792									1	15	10	5.75683	4.79042	0.889112		0	0
	1	14	183	6.26674	5.06059	0.840643	1.22301	19.5159	19.5159									1	5	49	8.96956	7.7686	0.903195	7.76659	86.5883	13.4117									1	1	5	9.18965	8.09311	0.919227	0.420428	4.57501	4.57501
	1	3	427	6.11457	5.13297	0.90563	4.88377	79.8711	20.1289									1	2	242	14.4911	12.034	0.844046	1.95315	13.4783	13.4783									1	8	58	11.7934	9.98312	0.893617	11.1054	94.1666	5.83344
	1	9	451	5.77225	4.68568	0.857459	4.59662	79.633	20.367									1	16	3	14.5983	12.9482	0.924586	1.96803	13.4812	13.4812									1	7	11	11.904	10.63	0.932142	11.1288	93.4883	6.51167
	1	10	6	5.94772	5.13446	0.923922	1.35176	22.7274	22.7274									1	17	2	15.3068	13.5392	0.913855	13.2321	86.4461	13.5539									1	2	54	5.38961	4.58117	0.917074	5.00668	92.895	7.10501
	1	2	6	5.32503	4.55271	0.915853	4.07143	76.4584	23.5416									1	7	9	5.51763	4.71008	0.919671	4.76952	86.4415	13.5585									1	11	2	11.2556	10.3342	0.953111	0.901411	8.00852	8.00852
	1	14	206	5.22458	4.13181	0.843549	1.28441	24.584	24.584									1	7	1	4.22381	3.5204	0.918329	3.65074	86.4324	13.5676									1	10	14	6.01894	5.0006	0.888539	5.48101	91.0626	8.93741
	1	6	73	5.44104	4.37119	0.835957	1.34544	24.7277	24.7277									1	6	23	4.45897	3.69711	0.900376	3.84283	86.1821	13.8179									1	2	72	9.63319	8.40145	0.908552	0.969652	10.0657	10.0657
	1	5	517	4.91859	4.15369	0.92482	1.26571	25.7332	25.7332									1	4	8	5.49233	4.53937	0.874024	0.775399	14.1179	14.1179									1	1	21	10.3698	8.88924	0.900726	1.06146	10.236	10.236
	1	13	24	5.70843	4.70398	0.88259	4.21716	73.876	26.124									1	10	203	17.3121	14.7711	0.868894	14.8068	85.5286	14.4714									1	2	29	14.1481	12.3814	0.899241	1.69364	11.9708	11.9708
	1	5	433	9.4862	8.1615	0.913057	2.50077	26.3622	26.3622									1	16	5	4.89302	4.15146	0.911547	4.1792	85.4115	14.5885									1	2	23	7.98403	6.70864	0.883552	0.968896	12.1354	12.1354
	1	3	47	4.23158	3.52784	0.911852	1.1359	26.8435	26.8435									1	14	5	5.54358	4.73898	0.939465	4.71694	85.0883	14.9117									1	12	12	10.4109	8.97225	0.875738	9.126	87.6581	12.3419
	1	15	558	5.52814	4.4555	0.822362	1.54991	28.0367	28.0367									1	1	10	6.868	5.74112	0.894049	5.83074	84.8972	15.1028									1	13	3	5.27809	4.54703	0.923992	4.62407	87.6087	12.3913
	1	14	1	4.96754	3.93489	0.837336	3.55757	71.6164	28.3836									1	15	215	7.90055	6.53549	0.871867	6.70248	84.8355	15.1645									1	1	17	5.07281	4.32759	0.901996	4.40446	86.8249	13.1751
	1	12	129	5.0631	4.08914	0.849737	3.60417	71.185	28.815									1	11	4	7.39452	6.23212	0.902207	1.12319	15.1895	15.1895									1	1	9	9.40617	8.16294	0.906904	1.26779	13.4783	13.4783
	1	3	424	5.30797	4.3581	0.888089	1.5675	29.5311	29.5311									1	17	1	10.3055	9.01944	0.913755	1.58694	15.399	15.399									1	1	16	4.80861	3.81419	0.846939	0.653673	13.5938	13.5938
	1	7	5	5.81664	4.98506	0.920425	4.08957	70.3081	29.6919									1	13	13	6.91821	5.87343	0.896785	5.85221	84.5914	15.4086									1	2	32	8.5481	7.117	0.874709	7.38582	86.403	13.597
	1	1	279	5.02437	4.13907	0.874086	1.50827	30.019	30.019									1	12	28	14.0109	11.6761	0.828081	2.16325	15.4398	15.4398									1	1	1	8.2541	6.98443	0.889029	7.07886	85.7618	14.2382
	1	1	56	5.20555	4.21965	0.869402	3.6084	69.3184	30.6816									1	15	3	5.30682	4.49505	0.901655	4.48633	84.5389	15.4611									1	2	14	8.56607	7.52946	0.92427	1.27479	14.8818	14.8818
	1	8	522	6.42577	5.45899	0.913331	2.01303	31.3274	31.3274									1	2	40	10.5216	9.2059	0.911125	1.63846	15.5724	15.5724									1	2	4	6.00168	5.11313	0.903146	0.915515	15.2543	15.2543
	1	14	538	6.32968	5.14164	0.866507	1.98521	31.3636	31.3636									1	11	205	6.1638	5.26289	0.871747	5.20214	84.3982	15.6018									1	2	35	5.71781	4.80839	0.902909	0.956054	16.7206	16.7206
	1	14	18	5.37418	4.45736	0.878632	1.7224	32.0495	32.0495									1	14	17	8.65948	7.39932	0.89369	7.30775	84.3901	15.6099									1	14	13	5.5607	4.73752	0.915375	4.585	82.4536	17.5464
	1	14	169	5.4413	4.52712	0.877572	3.68123	67.6536	32.3464									1	2	34	8.01572	6.85701	0.914248	1.25424	15.6472	15.6472									1	6	56	8.24799	6.72114	0.836916	6.78806	82.2996	17.7004
	1	3	39	4.25302	3.30724	0.83105	1.37698	32.3766	32.3766									1	4	15	7.50134	6.60189	0.930779	1.18059	15.7384	15.7384									1	3	10	14.2123	12.6632	0.91619	11.6898	82.2513	17.7487
	1	15	26	7.37793	6.53365	0.932939	4.95373	67.1425	32.8575									1	16	22	3.293	2.7092	0.91532	0.518571	15.7477	15.7477									1	8	21	5.59756	4.62352	0.859182	1.01679	18.1649	18.1649
	1	1	44	5.73129	4.6743	0.857778	3.83216	66.8638	33.1362									1	5	44	6.38894	5.4006	0.91343	1.04775	16.3994	16.3994									1	2	11	7.34446	6.18157	0.880506	5.97507	81.3548	18.6452
	1	14	37	5.65103	4.69533	0.883812	3.72911	65.9899	34.0101									1	6	32	6.16714	5.27158	0.9066	1.02539	16.6266	16.6266									1	15	15	6.66502	5.82107	0.942228	5.4115	81.1925	18.8075
	1	4	8	5.27556	4.40819	0.898389	1.79647	34.0527	34.0527									1	18	8	14.1984	12.3905	0.902682	2.40518	16.9398	16.9398									1	15	16	5.5946	4.7549	0.91078	4.53814	81.1165	18.8835
	1	1	228	6.9906	5.61886	0.834393	4.59702	65.76	34.24									1	18	253	10.8891	9.50448	0.91045	1.86035	17.0845	17.0845									1	12	16	11.1324	9.69204	0.913198	2.1133	18.9834	18.9834
	1	1	262	5.49275	4.31209	0.82603	3.60729	65.6736	34.3264									1	6	12	6.1081	5.03284	0.881813	5.04241	82.5528	17.4472									1	6	35	10.4901	9.27502	0.904248	1.99742	19.041	19.041
	1	1	507	4.96924	4.11588	0.875086	3.24601	65.322	34.678									1	10	23	8.07936	6.88222	0.892684	1.41601	17.5262	17.5262									1	7	5	6.5118	5.51503	0.900333	5.26228	80.8114	19.1886
	1	2	11	5.4117	4.61301	0.913971	1.87681	34.6806	34.6806									1	8	246	6.15724	5.22707	0.924973	1.0834	17.5955	17.5955									1	2	15	7.07148	6.11582	0.92528	5.70657	80.6983	19.3017
	1	14	539	5.61803	4.55032	0.845724	3.64938	64.9584	35.0416									1	2	238	7.70188	6.37612	0.859835	6.33757	82.2861	17.7139									1	13	1	6.34293	5.42463	0.918741	1.24329	19.6012	19.6012
	1	12	146	6.36524	5.0674	0.835856	4.13082	64.8966	35.1034									1	7	5	6.09305	5.16639	0.913861	1.09402	17.9552	17.9552									1	10	10	6.35257	5.52109	0.926903	1.26096	19.8496	19.8496
	1	1	246	5.56344	4.5801	0.875084	3.60885	64.8673	35.1327									1	1	173	4.57731	3.78537	0.902838	0.83005	18.134	18.134									1	9	4	8.78759	7.63264	0.914745	1.74742	19.8851	19.8851
	1	14	31	5.48831	4.3699	0.850573	3.54638	64.617	35.383									1	3	1	6.18577	5.22467	0.906793	1.12961	18.2614	18.2614									1	15	6	5.29633	4.4599	0.91342	1.05392	19.899	19.899
	1	9	16	9.17167	8.09923	0.928773	3.25557	35.496	35.496									1	3	5	4.83055	4.20516	0.940733	0.886713	18.3564	18.3564									1	13	12	7.89625	7.0595	0.946168	1.5796	20.0045	20.0045
	1	14	26	11.6072	9.82865	0.844815	4.12757	35.5605	35.5605									1	4	3	8.22294	7.30539	0.947847	1.52095	18.4964	18.4964									1	12	63	5.92692	4.97499	0.89033	1.20122	20.2673	20.2673
	1	6	40	6.65721	5.37794	0.835842	4.28497	64.3658	35.6342									1	14	3	4.11279	3.47133	0.937658	0.766537	18.6379	18.6379									1	8	25	5.93761	5.07946	0.909938	1.20721	20.3317	20.3317
	1	1	222	6.1381	4.92667	0.836156	3.9345	64.0995	35.9005									1	14	4	4.83244	3.98882	0.885603	3.92802	81.2843	18.7157									1	15	14	6.29559	5.08703	0.829696	5.00608	79.5173	20.4827
	1	3	54	6.32464	5.1018	0.849284	4.04594	63.971	36.029									1	16	220	18.432	15.4936	0.850813	3.47796	18.8691	18.8691									1	3	3	7.58222	6.64826	0.938742	6.02087	79.4078	20.5922
	1	9	14	7.1808	5.93403	0.874691	2.5974	36.1714	36.1714									1	9	7	6.77251	5.85172	0.914144	1.27806	18.8713	18.8713									1	7	3	6.68222	5.76825	0.919293	1.48051	22.1559	22.1559
	1	5	8	6.99696	5.90492	0.899944	2.53722	36.2617	36.2617									1	5	17	10.0642	8.17877	0.831662	8.15676	81.0472	18.9528									1	5	11	21.8331	19.2978	0.904881	16.8349	77.1073	22.8927
	1	12	126	11.1326	9.28197	0.849979	7.08355	63.6288	36.3712									1	6	13	11.0994	9.84423	0.928308	8.99201	81.0133	18.9867									1	3	4	8.52259	7.51825	0.93664	6.55659	76.9319	23.0681
	1	15	18	5.56784	4.59779	0.866273	2.02901	36.4416	36.4416									1	6	25	5.78801	4.94479	0.915796	4.67687	80.8026	19.1974									1	10	11	17.8968	15.2971	0.871225	4.15405	23.2111	23.2111
	1	14	479	5.0152	4.1204	0.875772	3.18682	63.5432	36.4568									1	10	6	7.19734	6.13382	0.905775	1.38417	19.2317	19.2317									1	4	10	8.81265	7.56683	0.896362	2.085	23.6591	23.6591
	1	13	17	5.56318	4.8131	0.933768	3.50275	62.9631	37.0369									1	15	15	8.85312	7.84051	0.934625	1.70567	19.2663	19.2663									1	11	8	7.25661	6.19497	0.894076	5.51864	76.0497	23.9503
	1	9	15	6.16982	5.16109	0.887722	3.87944	62.8776	37.1224									1	10	24	6.98327	5.65354	0.836171	1.34878	19.3144	19.3144									1	2	36	6.12071	5.21461	0.89837	1.48291	24.2277	24.2277
	1	12	466	5.42683	4.55901	0.898021	2.01853	37.1954	37.1954									1	12	21	6.13761	5.0747	0.879072	1.19418	19.4567	19.4567									1	14	14	7.9816	6.81321	0.897411	1.96213	24.5832	24.5832
	1	11	13	6.83658	5.81175	0.912429	4.285	62.6776	37.3224									1	2	38	5.15113	4.23178	0.900986	1.00289	19.4693	19.4693									1	13	9	7.49089	6.56701	0.938384	1.84983	24.6945	24.6945
	1	2	420	6.02936	4.82091	0.832123	2.25775	37.446	37.446									1	14	9	11.6746	9.79676	0.885214	9.39864	80.5052	19.4948									1	6	33	6.93693	5.90117	0.894877	5.15767	74.3509	25.6491
	1	1	508	5.08708	4.23811	0.883464	3.17086	62.3317	37.6683									1	16	20	3.61775	2.98433	0.914167	0.709721	19.6177	19.6177									1	11	4	7.23909	6.11668	0.900601	5.36921	74.1698	25.8302
	1	9	2	6.32058	5.00379	0.801976	2.3962	37.9111	37.9111									1	15	217	8.52541	7.37821	0.915456	1.67739	19.6751	19.6751									1	15	1	6.34452	5.58842	0.949118	1.64559	25.9372	25.9372
	1	11	16	5.3617	4.49325	0.896869	3.31212	61.7737	38.2263									1	4	16	6.35256	5.40459	0.907836	1.25686	19.7851	19.7851									1	2	21	4.4753	3.794	0.935678	3.31152	73.9956	26.0044
	1	12	92	6.22221	5.05335	0.858532	3.83252	61.5942	38.4058									1	1	8	7.3852	6.28542	0.903477	5.92393	80.2135	19.7865									1	6	11	11.6932	9.7206	0.847358	3.05544	26.13	26.13
	1	1	3	5.37027	4.4429	0.869557	3.30342	61.5132	38.4868									1	6	29	15.212	13.0411	0.884276	12.1881	80.1221	19.8779									1	14	12	7.63682	6.55151	0.90573	2.04147	26.7319	26.7319
	1	1	24	7.33528	5.95739	0.839049	2.82373	38.4952	38.4952									1	11	2	8.17581	7.08247	0.916906	6.54212	80.018	19.982									1	3	12	8.28835	7.22803	0.919052	2.27722	27.475	27.475
	1	14	484	7.25956	5.73486	0.821046	4.46321	61.4805	38.5195									1	5	26	7.46924	6.26641	0.87875	5.9735	79.9746	20.0254									1	13	67	6.61098	5.42584	0.847992	4.78345	72.3562	27.6438
	1	15	24	9.91091	8.59923	0.903263	3.84213	38.7667	38.7667									1	6	22	5.03313	4.20529	0.897878	4.02149	79.9003	20.0997									1	10	12	5.30245	4.65655	0.949158	1.47821	27.8779	27.8779
	1	1	283	6.87948	5.81139	0.885832	4.2118	61.2227	38.7773									1	9	188	17.1196	14.9279	0.922093	13.6579	79.7794	20.2206									1	8	61	9.15755	7.32724	0.818346	6.58097	71.8639	28.1361
	1	3	41	6.96486	5.61279	0.846668	4.23248	60.7691	39.2309									1	17	9	7.12068	5.84056	0.816158	5.67527	79.7013	20.2987									1	6	9	6.84033	5.59118	0.854894	1.93155	28.2376	28.2376
	1	12	26	5.28786	4.37975	0.893874	2.0767	39.273	39.273									1	5	47	20.182	17.9189	0.910836	4.11359	20.3824	20.3824									1	12	6	9.63093	8.61175	0.938281	6.90173	71.6621	28.3379
	1	1	266	6.3984	5.39732	0.885241	2.52283	39.4291	39.4291									1	2	1	7.25919	6.42495	0.943653	1.47973	20.3842	20.3842									1	4	9	5.89263	5.03212	0.902159	4.21974	71.6105	28.3895
	1	13	19	5.61896	4.63866	0.87993	3.4011	60.5289	39.4711									1	5	34	6.02711	5.15893	0.91617	1.23262	20.4512	20.4512									1	8	60	7.95468	6.66215	0.87419	2.26617	28.4885	28.4885
	1	3	426	7.9894	6.70015	0.885993	4.83305	60.4933	39.5067									1	15	14	6.81682	5.51146	0.865486	5.41965	79.504	20.496									1	6	7	6.88029	5.89457	0.907026	1.97108	28.6483	28.6483
	1	14	489	6.53815	5.36497	0.866654	3.93407	60.171	39.829									1	13	213	4.37646	3.48035	0.862488	3.44886	78.8048	21.1952									1	9	11	7.40269	6.32146	0.905401	2.1289	28.7584	28.7584
	1	10	4	6.32832	5.021	0.871047	3.8042	60.1139	39.8861									1	8	186	6.61804	5.60691	0.918489	5.2028	78.6155	21.3845									1	4	12	6.19446	5.27081	0.912177	1.79719	29.0129	29.0129
	1	3	42	6.17983	4.94249	0.832671	2.46695	39.9194	39.9194									1	7	12	7.18173	6.01449	0.875476	1.55686	21.678	21.678									1	15	5	7.90438	6.93627	0.934203	2.30608	29.1748	29.1748
	1	14	9	5.01613	4.16206	0.889682	2.01571	40.1845	40.1845									1	8	7	5.23721	4.40233	0.91068	4.09718	78.2321	21.7679									1	7	10	6.54743	5.70054	0.93806	4.63169	70.7406	29.2594
	1	12	31	4.92386	4.01121	0.865691	1.97952	40.2026	40.2026									1	6	27	5.99989	5.08322	0.918168	1.30647	21.7749	21.7749									1	15	12	8.85808	7.64358	0.909407	2.62229	29.6034	29.6034
	1	7	444	9.84447	8.45899	0.908453	3.95908	40.2163	40.2163									1	4	1	3.61832	2.93521	0.890314	2.8271	78.1329	21.8671									1	5	5	8.1545	6.87714	0.886203	5.73653	70.3481	29.6519
	1	15	19	6.00593	4.83645	0.852588	3.58341	59.6645	40.3355									1	9	5	6.98022	5.91415	0.907839	1.53307	21.9631	21.9631									1	3	9	10.9605	9.30475	0.881459	7.69037	70.1643	29.8357
	1	1	282	7.06673	5.74922	0.863465	4.198	59.4052	40.5948									1	9	10	5.37623	4.43186	0.889844	1.18778	22.0932	22.0932									1	13	69	5.00438	4.17919	0.911275	3.49836	69.9059	30.0941
	1	14	548	5.63409	4.48374	0.838948	3.33505	59.1941	40.8059									1	6	33	7.8332	6.59725	0.898776	1.73108	22.0992	22.0992									1	14	4	7.58521	6.72873	0.943165	5.26027	69.349	30.651
	1	11	8	7.37348	6.25488	0.887513	3.0089	40.807	40.807									1	6	181	8.48236	7.06589	0.904685	1.88391	22.2097	22.2097									1	2	41	7.82902	6.68558	0.904378	2.44727	31.2589	31.2589
	1	15	40	9.90577	7.87019	0.816951	5.85225	59.0792	40.9208									1	10	194	7.60439	6.04662	0.824782	1.70244	22.3876	22.3876									1	8	16	4.25165	3.2029	0.801658	1.33486	31.3962	31.3962
	1	15	23	5.86169	4.96882	0.898605	3.45421	58.9285	41.0715									1	17	12	5.56447	4.844	0.93869	4.30834	77.426	22.574									1	10	4	8.45239	7.22511	0.895742	5.78289	68.4172	31.5828
	1	1	61	5.60823	4.67584	0.882311	2.31761	41.3251	41.3251									1	11	6	5.87763	5.09071	0.919067	1.3306	22.6385	22.6385									1	12	14	8.3082	6.77579	0.837687	2.63238	31.6842	31.6842
	1	1	252	5.55947	4.61951	0.872931	2.30516	41.4636	41.4636									1	6	6	6.38665	5.44371	0.904339	1.4508	22.7161	22.7161									1	7	2	4.84129	4.01679	0.894053	1.53687	31.7451	31.7451
	1	2	8	8.61983	7.49693	0.91101	3.57848	41.5145	41.5145									1	9	190	8.50485	7.17872	0.866056	1.933	22.7282	22.7282									1	13	68	5.49884	4.59533	0.897405	3.73986	68.0117	31.9883
	1	12	72	7.73867	6.42189	0.882368	3.21626	41.5609	41.5609									1	9	8	6.13304	5.39129	0.930846	4.7366	77.2309	22.7691									1	13	10	16.0191	14.355	0.931557	5.17271	32.291	32.291
	1	5	12	8.73794	7.20147	0.859175	5.10625	58.4377	41.5623									1	12	16	8.26955	6.62538	0.826561	1.88389	22.7811	22.7811									1	8	20	6.33239	4.92404	0.80618	2.04611	32.3118	32.3118
	1	14	213	8.16251	6.94704	0.90083	3.39867	41.6375	41.6375									1	5	45	3.00847	2.41079	0.901467	2.32262	77.2027	22.7973									1	15	13	8.43092	7.25694	0.89953	5.645	66.9559	33.0441
	1	14	487	5.99123	4.7685	0.827955	3.49376	58.3146	41.6854									1	2	10	7.02255	5.48923	0.814339	5.41578	77.1198	22.8802									1	12	1	6.40418	5.45352	0.914049	2.15075	33.5836	33.5836
	1	12	144	10.0479	8.40127	0.861629	5.83454	58.0674	41.9326									1	10	199	5.60975	4.58015	0.869741	1.28494	22.9054	22.9054									1	1	4	5.76972	5.08191	0.945812	3.81482	66.1179	33.8821
	1	12	8	6.92001	5.79063	0.877705	4.01443	58.012	41.988									1	4	12	5.29088	4.58938	0.931814	1.22152	23.0872	23.0872									1	8	19	6.26107	5.34663	0.917843	2.13246	34.059	34.059
	1	14	111	5.14812	4.27338	0.893944	2.97907	57.8671	42.1329									1	14	16	6.39763	5.41631	0.912689	4.9108	76.7597	23.2403									1	8	24	11.1441	9.68909	0.908879	7.32544	65.7337	34.2663
	1	12	159	6.82755	5.78149	0.887221	3.95052	57.8615	42.1385									1	14	12	5.47148	4.62128	0.909006	1.27767	23.3515	23.3515									1	10	3	5.94665	5.05346	0.915864	2.03801	34.2716	34.2716
	1	3	421	6.08027	4.89312	0.827971	2.56625	42.2062	42.2062									1	16	21	5.98523	4.99831	0.902566	1.40214	23.4266	23.4266									1	4	1	10.4904	9.08918	0.898623	3.59607	34.2796	34.2796
	1	1	196	7.19841	5.88152	0.847154	4.14662	57.6047	42.3953									1	9	3	8.28906	6.93563	0.885091	1.955	23.5853	23.5853									1	8	59	7.84144	6.79743	0.935439	5.1451	65.6142	34.3858
	1	6	30	9.93897	8.38845	0.883772	5.72151	57.5665	42.4335									1	19	30	4.052	3.36753	0.898846	0.959527	23.6804	23.6804									1	15	7	8.01216	6.67304	0.882358	5.2483	65.5042	34.4958
	1	7	521	6.63448	5.7035	0.912995	3.81916	57.5653	42.4347									1	1	3	5.6965	4.55766	0.847937	1.35824	23.8435	23.8435									1	3	11	10.4689	9.36481	0.940543	3.65744	34.9363	34.9363
	1	14	536	6.79912	5.54885	0.86444	2.88635	42.4518	42.4518									1	14	13	6.01042	5.08821	0.90516	4.57535	76.1236	23.8764									1	13	65	19.1136	16.5284	0.892252	12.4273	65.0182	34.9818
	1	1	13	6.55379	5.53231	0.886514	3.77158	57.5481	42.4519									1	5	32	7.04756	6.13813	0.932513	5.36177	76.0798	23.9202									1	8	27	6.25497	5.43161	0.914368	2.18924	34.9999	34.9999
	1	1	317	5.39257	4.31428	0.840795	3.10328	57.5473	42.4527									1	13	12	5.93501	5.02337	0.904883	4.51182	76.0205	23.9795									1	7	4	10.3384	8.76642	0.884116	3.65552	35.3587	35.3587
	1	5	14	6.87069	5.73039	0.873426	2.9205	42.5067	42.5067									1	4	2	7.53005	6.31582	0.896226	5.72436	76.0202	23.9798									1	1	7	9.52757	8.25173	0.915764	3.37865	35.4618	35.4618
	1	2	4	6.74147	5.95196	0.939229	3.87421	57.4683	42.5317									1	10	2	14.6422	12.9934	0.914707	11.1164	75.9203	24.0797									1	11	11	10.5554	9.12008	0.899743	6.80971	64.5141	35.4859
	1	1	231	8.12948	6.63866	0.848524	4.66565	57.3917	42.6083									1	3	3	7.27772	6.00966	0.874832	5.50596	75.6551	24.3449									1	12	2	4.70097	3.86121	0.90767	1.67869	35.7094	35.7094
	1	14	7	8.27064	6.95482	0.879622	4.74345	57.3528	42.6472									1	5	39	5.62619	4.78518	0.911088	4.22059	75.0169	24.9831									1	2	37	5.69528	4.89317	0.90632	2.03814	35.7865	35.7865
	1	6	61	8.22853	6.65981	0.828294	4.71843	57.3423	42.6577									1	2	28	7.26121	5.88472	0.83783	1.83264	25.2388	25.2388									1	6	32	8.56885	7.49356	0.922688	5.48929	64.061	35.939
	1	14	81	7.36202	6.24082	0.886249	4.22096	57.3342	42.6658									1	4	7	16.126	13.9402	0.897748	4.11435	25.5137	25.5137									1	14	73	3.01528	2.37929	0.873027	1.08385	35.9452	35.9452
	1	13	20	9.79113	8.43555	0.894573	5.61177	57.3148	42.6852									1	5	43	7.00082	6.15471	0.927902	5.21258	74.4567	25.5433									1	3	6	8.56697	7.15121	0.863257	5.45415	63.6649	36.3351
	1	5	11	9.93591	8.43052	0.873829	4.2505	42.7792	42.7792									1	3	13	9.16146	7.97098	0.920504	6.82119	74.4553	25.5447									1	5	13	7.32294	6.47402	0.946647	2.67129	36.4784	36.4784
	1	1	499	7.34933	6.08982	0.848469	4.20049	57.1548	42.8452									1	6	20	9.45657	7.99177	0.883749	7.02389	74.2753	25.7247									1	14	2	4.99501	4.29852	0.931372	1.86993	37.436	37.436
	1	6	9	12.3932	10.6526	0.890185	7.08128	57.1385	42.8615									1	12	3	5.86461	4.95353	0.920081	1.53415	26.1595	26.1595									1	6	22	6.7955	5.55891	0.877421	4.23866	62.3745	37.6255
	1	14	551	10.5959	8.66782	0.834713	6.04635	57.0634	42.9366									1	19	42	6.41072	5.35922	0.882888	1.67792	26.1736	26.1736									1	11	13	5.94794	5.10219	0.918721	3.70695	62.3233	37.6767
	1	12	530	6.59493	5.33609	0.839027	3.75635	56.9581	43.0419									1	12	11	7.99782	6.91786	0.909581	5.8944	73.7001	26.2999									1	8	10	6.01068	4.91725	0.871344	2.27332	37.8213	37.8213
	1	1	193	10.4548	8.84205	0.885814	5.95249	56.9355	43.0645									1	19	256	7.24084	5.80331	0.828445	1.91259	26.414	26.414									1	15	17	9.69121	8.65504	0.954865	6.01968	62.1149	37.8851
	1	4	5	8.22135	7.0476	0.891917	3.54577	43.1288	43.1288									1	19	40	8.34405	6.81294	0.849988	6.13753	73.5557	26.4443									1	8	8	8.53631	6.94092	0.816245	5.27679	61.8158	38.1842
	1	12	463	7.93947	6.44319	0.836965	4.5048	56.7393	43.2607									1	11	10	4.56021	3.81411	0.913496	3.35397	73.5487	26.4513									1	8	6	6.00275	4.71623	0.830511	2.31766	38.61	38.61
	1	3	63	10.4367	8.78011	0.871245	4.51664	43.2767	43.2767									1	12	8	5.49703	4.58434	0.89154	1.4655	26.6599	26.6599									1	2	17	5.38195	4.45152	0.880387	2.07874	38.6243	38.6243
	1	12	145	8.4094	7.20999	0.892867	3.63937	43.2774	43.2774									1	5	176	9.64036	8.30402	0.906196	7.06935	73.3307	26.6693									1	5	6	7.64105	6.69976	0.92184	4.67463	61.1778	38.8222
	1	6	11	7.01489	5.8236	0.868881	3.97319	56.6395	43.3605									1	15	2	6.35218	5.53897	0.935924	1.69466	26.6784	26.6784									1	1	19	11.0353	9.85166	0.932302	6.74996	61.1667	38.8333
	1	1	278	7.19408	5.83723	0.859191	4.0714	56.5938	43.4062									1	11	206	7.0663	5.7988	0.869677	5.17948	73.2984	26.7016									1	12	51	5.0982	4.27796	0.901138	3.11822	61.1631	38.8369
	1	5	20	5.96459	4.71742	0.829618	3.36974	56.4956	43.5044									1	6	3	7.13605	6.08448	0.901653	1.91336	26.8126	26.8126									1	7	1	9.76866	8.62606	0.926649	5.95012	60.9103	39.0897
	1	12	6	8.29811	7.14688	0.899695	3.62073	43.6332	43.6332									1	13	9	15.0322	13.5569	0.926454	4.05638	26.9846	26.9846									1	1	13	10.1431	8.61078	0.872713	6.16653	60.7953	39.2047
	1	14	554	9.74076	7.82434	0.828025	5.48877	56.3485	43.6515									1	10	4	9.15437	7.8672	0.891693	6.66697	72.8282	27.1718									1	12	8	10.117	8.72628	0.892048	4.00774	39.6141	39.6141
	1	12	104	6.19394	4.96342	0.815671	2.70634	43.6934	43.6934									1	2	7	6.1913	5.39313	0.938222	1.68234	27.1726	27.1726									1	15	2	9.47458	8.3101	0.908624	3.76763	39.7657	39.7657
	1	15	4	9.98791	8.48268	0.88486	4.36505	43.7033	43.7033									1	11	8	4.79675	4.02062	0.904343	3.48799	72.7158	27.2842									1	8	9	5.43457	4.31464	0.826288	2.19212	40.3366	40.3366
	1	3	422	10.1193	8.40155	0.854696	5.69277	56.2568	43.7432									1	15	218	4.4476	3.66044	0.910284	3.22916	72.6044	27.3956									1	7	6	7.15217	6.27734	0.934702	4.26426	59.6219	40.3781
	1	1	27	8.61455	7.07201	0.848858	4.84558	56.2488	43.7512									1	2	15	5.35328	4.58896	0.93055	1.46997	27.4592	27.4592									1	6	34	10.6322	9.20198	0.893084	6.31404	59.386	40.614
	1	12	89	10.5928	8.74587	0.854556	4.63505	43.7564	43.7564									1	1	21	7.72053	6.33599	0.864738	5.59443	72.4617	27.5383									1	12	9	8.2435	7.32067	0.927288	4.8357	58.6608	41.3392
	1	5	21	6.47058	5.16812	0.827824	2.83241	43.7736	43.7736									1	15	16	8.9251	7.81208	0.909505	6.46583	72.4454	27.5546									1	8	7	6.41463	5.39494	0.903256	3.75933	58.6055	41.3945
	1	7	1	10.1831	8.93691	0.910876	5.71631	56.1352	43.8648									1	6	2	5.86693	4.95623	0.909461	4.23987	72.2673	27.7327									1	9	5	8.31247	7.27668	0.920963	4.84087	58.2362	41.7638
	1	14	128	7.64688	5.96445	0.810682	3.35492	43.8731	43.8731									1	15	8	4.6759	3.96635	0.92362	1.31776	28.1819	28.1819									1	12	15	6.43625	5.15542	0.831419	2.70033	41.955	41.955
	1	12	473	6.07661	4.91907	0.868383	2.66627	43.8776	43.8776									1	6	182	10.1924	8.51276	0.871477	2.88362	28.292	28.292									1	1	2	7.11692	6.0946	0.90072	4.11382	57.8033	42.1967
	1	2	513	6.12178	4.98694	0.845129	2.68637	43.8822	43.8822									1	5	14	7.56159	6.08837	0.857732	5.41239	71.5774	28.4226									1	14	11	8.49106	7.27937	0.896321	3.59646	42.3558	42.3558
	1	14	23	9.92127	8.44312	0.87828	5.56364	56.0779	43.9221									1	1	23	6.60122	5.4708	0.886942	4.71861	71.4809	28.5191									1	1	3	7.11194	5.86641	0.860061	4.09442	57.571	42.429
	1	1	240	6.25754	5.22323	0.871304	2.75034	43.9524	43.9524									1	1	172	8.94758	8.12887	0.958405	2.55297	28.5325	28.5325									1	12	64	8.48655	7.04352	0.838628	3.6449	42.9492	42.9492
	1	14	486	7.09659	5.69866	0.831393	3.97663	56.0358	43.9642									1	10	192	9.91001	8.54008	0.90069	2.83239	28.5811	28.5811									1	14	8	9.83156	8.49582	0.906808	4.22634	42.9875	42.9875
	1	14	87	7.59893	6.35707	0.872048	4.25481	55.9923	44.0077									1	12	22	9.77851	8.40031	0.898275	2.79803	28.614	28.614									1	15	3	10.5489	9.10064	0.890254	4.5502	43.1344	43.1344
	1	3	62	7.57625	6.58366	0.92238	4.23837	55.9428	44.0572									1	15	9	8.69335	7.46239	0.901678	6.19973	71.3158	28.6842									1	13	11	8.40825	7.14253	0.883163	3.64163	43.3102	43.3102
	1	7	6	10.4875	8.9311	0.876449	5.86678	55.9406	44.0594									1	14	21	6.14105	5.25698	0.915983	1.76722	28.7772	28.7772									1	8	14	8.28733	7.07524	0.907367	4.68585	56.5423	43.4577
	1	3	32	7.72169	6.43281	0.900922	3.40764	44.1307	44.1307									1	6	21	5.36057	4.68773	0.933927	1.54393	28.8016	28.8016									1	1	10	8.44437	7.28602	0.895446	4.74392	56.1786	43.8214
	1	12	2	8.61401	7.39588	0.894224	3.80213	44.139	44.139									1	1	11	10.4846	9.05323	0.899972	7.46184	71.1694	28.8306									1	13	13	8.08865	6.92699	0.886887	3.56742	44.104	44.104
	1	12	465	8.63639	7.01534	0.836142	4.82181	55.8313	44.1687									1	7	14	7.04248	6.0253	0.91697	2.04043	28.9732	28.9732									1	8	12	6.03331	5.02057	0.903076	2.67494	44.3362	44.3362
	1	1	65	7.84513	6.43705	0.840358	3.4655	44.1739	44.1739									1	8	6	9.21821	7.8963	0.908976	6.53511	70.8935	29.1065									1	5	8	5.19631	4.4445	0.923505	2.30492	44.3568	44.3568
	1	3	352	8.41771	7.23848	0.902473	4.69762	55.8064	44.1936									1	19	48	6.41159	5.24136	0.845656	1.87071	29.177	29.177									1	4	7	10.6189	9.49896	0.923464	5.90457	55.6044	44.3956
	1	12	87	9.21035	7.50173	0.839485	5.13876	55.7933	44.2067									1	10	26	5.38998	4.53449	0.878199	3.80359	70.5678	29.4322									1	8	13	7.45004	6.40731	0.917675	4.13429	55.4935	44.5065
	1	2	10	10.2954	8.72944	0.866592	5.74378	55.7899	44.2101									1	16	27	7.13022	6.30266	0.936249	5.01606	70.3492	29.6508									1	6	28	6.63269	5.48397	0.874118	2.96278	44.6693	44.6693
	1	8	4	9.38671	7.85269	0.851934	5.23429	55.7628	44.2372									1	9	189	5.76006	4.67536	0.880122	4.05065	70.323	29.677									1	11	1	7.84044	6.70275	0.907578	3.50405	44.692	44.692
	1	3	50	7.37648	6.10619	0.845519	4.11077	55.7282	44.2718									1	5	55	8.84323	7.55291	0.891034	6.1917	70.0163	29.9837									1	6	13	6.65304	5.1815	0.812887	2.97828	44.7658	44.7658
	1	7	3	7.90356	6.79107	0.89737	4.39972	55.6676	44.3324									1	1	24	6.44599	5.38693	0.892899	1.95171	30.2779	30.2779									1	5	10	9.13871	7.957	0.909893	5.02758	55.0142	44.9858
	1	7	443	6.88533	5.79263	0.902954	3.05392	44.3541	44.3541									1	12	4	7.70384	6.69773	0.922306	5.3628	69.6121	30.3879									1	10	5	7.20714	6.32306	0.930459	3.96297	54.9867	45.0133
	1	1	293	6.78732	5.69224	0.87847	3.77634	55.6381	44.3619									1	17	4	12.0769	10.3711	0.887845	8.383	69.4136	30.5864									1	10	7	6.00105	5.31844	0.951607	3.29526	54.9114	45.0886
	1	14	542	6.72612	5.50621	0.844966	2.98621	44.3973	44.3973									1	6	11	6.87456	5.78786	0.888692	2.11463	30.7602	30.7602									1	2	6	10.413	9.13605	0.910038	5.71535	54.8867	45.1133
	1	14	549	7.5488	6.13599	0.834665	3.35325	44.421	44.421									1	1	14	10.1004	8.49436	0.883281	3.11532	30.8436	30.8436									1	6	30	5.6994	4.45143	0.824085	3.1228	54.7916	45.2084
	1	14	543	6.80598	5.53114	0.857677	3.02494	44.4453	44.4453									1	6	240	20.9381	18.8214	0.915439	14.4777	69.1453	30.8547									1	14	1	7.20558	6.15194	0.899578	3.91888	54.3868	45.6132
	1	15	35	8.61793	7.0755	0.861713	3.83883	44.5447	44.5447									1	3	243	23.3139	19.9977	0.868815	16.1081	69.0923	30.9077									1	1	15	7.85404	6.75982	0.910024	3.58447	45.6386	45.6386
	1	10	5	6.05278	4.87142	0.830317	3.35388	55.4105	44.5895									1	12	212	4.30037	3.32168	0.840669	2.96962	69.055	30.945									1	7	7	5.80301	4.85245	0.9077	2.66748	45.9671	45.9671
	1	3	30	6.46186	5.1328	0.829884	2.88856	44.7018	44.7018									1	8	8	8.4384	7.19153	0.912473	2.61335	30.9697	30.9697									1	4	4	10.4967	9.36986	0.923427	4.83184	46.0318	46.0318
	1	13	477	8.70505	6.98419	0.819342	4.81316	55.2916	44.7084									1	6	8	6.16306	5.1995	0.908592	1.93367	31.3752	31.3752									1	2	38	7.32678	6.35133	0.919647	3.94774	53.881	46.119
	1	2	19	7.08014	6.26535	0.939984	3.91345	55.2736	44.7264									1	2	174	10.8126	9.1772	0.87819	3.42558	31.6813	31.6813									1	6	26	10.6077	9.15856	0.886301	5.70484	53.7801	46.2199
	1	13	18	8.32471	7.28863	0.920391	3.72412	44.7357	44.7357									1	16	25	6.52914	5.70045	0.930665	4.44848	68.1327	31.8673									1	11	62	8.74891	7.40413	0.894385	4.69954	53.7158	46.2842
	1	6	13	7.83306	6.65512	0.889346	4.32615	55.2294	44.7706									1	19	236	6.95459	5.6178	0.840127	4.73212	68.0432	31.9568									1	14	6	7.83011	6.79229	0.898815	3.63267	46.3935	46.3935
	1	14	12	8.09474	6.94323	0.900802	4.46751	55.1902	44.8098									1	14	11	4.80598	4.04401	0.930392	1.53601	31.9604	31.9604									1	9	1	23.996	21.0403	0.875875	11.133	46.3952	46.3952
	1	6	519	6.36957	5.26854	0.866407	3.5153	55.189	44.811									1	6	7	4.97677	4.09183	0.890202	3.37719	67.859	32.141									1	14	70	5.79167	4.94112	0.934266	2.69032	46.4516	46.4516
	1	8	445	7.30577	6.36446	0.930143	4.02905	55.1488	44.8512									1	17	8	6.18991	4.96111	0.829922	4.19183	67.7204	32.2796									1	9	2	9.02848	7.90685	0.918801	4.83429	53.5449	46.4551
	1	12	25	5.98455	4.96978	0.8876	3.29819	55.1118	44.8882									1	8	9	4.30204	3.6176	0.927534	1.38922	32.2922	32.2922									1	1	23	7.18433	6.24299	0.909314	3.33823	46.4654	46.4654
	1	13	478	8.71502	7.17539	0.886378	3.91352	44.9054	44.9054									1	19	229	6.59337	5.40357	0.864302	4.44232	67.3756	32.6244									1	4	11	13.0084	11.6976	0.930684	6.0557	46.5522	46.5522
	1	12	461	6.85049	5.49549	0.840203	3.07642	44.908	44.908									1	17	5	6.68528	5.86741	0.917215	4.50374	67.3679	32.6321									1	2	26	9.14063	7.49784	0.878628	4.87949	53.3824	46.6176
	1	15	557	7.96841	6.44751	0.827207	3.58067	44.9359	44.9359									1	8	2	6.27704	5.36324	0.91767	4.22753	67.3491	32.6509									1	5	1	8.98773	7.70345	0.893568	4.78978	53.2924	46.7076
	1	12	117	6.52183	5.25131	0.838298	3.59118	55.064	44.936									1	15	5	5.90889	5.05625	0.91998	3.9679	67.1514	32.8486									1	8	26	9.21248	8.12744	0.924968	4.30724	46.7544	46.7544
	1	9	523	5.57238	4.70105	0.921523	2.5044	44.9432	44.9432									1	16	9	7.57382	6.53318	0.910836	2.5114	33.1589	33.1589									1	5	9	9.47214	8.26686	0.907129	5.03906	53.1988	46.8012
	1	1	132	6.1889	5.05566	0.846356	3.4054	55.0244	44.9756									1	19	257	6.4373	5.25323	0.845	4.30024	66.802	33.198									1	2	27	9.33528	7.70739	0.845151	4.37968	46.9154	46.9154
	1	6	441	8.16783	7.01575	0.895637	4.49183	54.9942	45.0058									1	3	10	9.17922	7.45363	0.82435	3.05044	33.232	33.232									1	13	7	5.88846	5.11393	0.894377	2.76456	46.9488	46.9488
	1	6	71	9.53926	8.24964	0.900202	4.2981	45.0569	45.0569									1	17	221	9.76813	8.23576	0.868881	3.27677	33.5455	33.5455									1	11	3	10.1935	9.07969	0.920991	4.79477	47.0376	47.0376
	1	14	219	5.65568	4.75302	0.883023	3.10662	54.9291	45.0709									1	9	6	7.39756	6.3756	0.901713	4.89881	66.2219	33.7781									1	1	8	7.9383	6.6175	0.864035	3.73941	47.106	47.106
	1	8	7	6.27973	5.39691	0.920957	2.83094	45.0806	45.0806									1	10	5	5.25076	4.30071	0.863972	3.47637	66.2069	33.7931									1	13	66	10.1023	8.28789	0.817459	4.75941	47.1121	47.1121
	1	3	60	9.33546	8.17111	0.908324	4.21012	45.0982	45.0982									1	19	237	4.74359	3.75438	0.836413	3.13873	66.1679	33.8321									1	12	7	8.25665	6.99055	0.880938	3.89113	47.1272	47.1272
	1	1	190	8.46858	6.978	0.843119	4.64853	54.8915	45.1085									1	1	15	4.97864	4.09025	0.888043	3.29331	66.1489	33.8511									1	7	9	9.6353	8.25812	0.895543	4.54768	47.1981	47.1981
	1	15	5	7.36218	6.24798	0.899969	4.04038	54.8803	45.1197									1	10	1	6.67331	5.69535	0.90169	4.40925	66.0729	33.9271									1	10	9	5.3836	4.65137	0.931316	2.54217	47.2206	47.2206
	1	10	525	6.47149	5.31115	0.875262	3.55057	54.8647	45.1353									1	7	4	12.1115	10.4373	0.902047	4.11601	33.9842	33.9842									1	14	5	7.78176	6.62949	0.887515	4.10097	52.6998	47.3002
	1	12	136	7.3264	6.12175	0.878186	4.01887	54.8547	45.1453									1	1	6	15.4481	13.2629	0.882034	5.25255	34.0013	34.0013									1	8	3	8.22108	6.82843	0.878529	4.31826	52.5267	47.4733
	1	1	276	6.92585	5.77651	0.870798	3.79893	54.8514	45.1486									1	10	34	5.97313	5.06465	0.886088	2.05132	34.3425	34.3425									1	4	8	10.1504	8.97887	0.915608	5.33036	52.5137	47.4863
	1	1	124	7.39667	6.23131	0.89428	3.3406	45.1636	45.1636									1	19	223	6.80219	5.44717	0.841122	4.44081	65.285	34.715									1	2	34	6.11442	5.14631	0.887702	3.20502	52.4173	47.5827
	1	14	541	6.45529	5.19325	0.845019	2.91707	45.1888	45.1888									1	1	18	9.40737	8.02481	0.886742	3.27584	34.8221	34.8221									1	2	1	8.89411	7.81886	0.917126	4.65653	52.3551	47.6449
	1	13	23	10.1534	8.85419	0.907435	4.58991	45.2057	45.2057									1	6	34	5.37091	4.58658	0.917924	1.87276	34.8686	34.8686									1	6	25	8.3614	7.02804	0.881819	3.98453	47.6539	47.6539
	1	14	59	8.67333	7.3197	0.878539	3.92119	45.2098	45.2098									1	8	187	8.37355	7.13975	0.892124	2.92816	34.9692	34.9692									1	5	12	7.99319	6.83627	0.883271	4.17387	52.2178	47.7822
	1	12	527	9.44314	7.98343	0.869095	5.16817	54.7294	45.2706									1	2	43	7.78715	6.40962	0.885353	5.05872	64.9624	35.0376									1	6	57	8.95315	7.75047	0.90771	4.28599	47.8713	47.8713
	1	6	81	10.4146	8.74042	0.864578	5.69944	54.7254	45.2746									1	10	196	7.89269	6.51958	0.867344	5.10515	64.682	35.318									1	8	2	11.2164	9.51027	0.858342	5.84596	52.1196	47.8804
	1	3	353	6.02448	4.87255	0.871207	2.728	45.2819	45.2819									1	6	31	6.82557	5.87274	0.905647	2.42975	35.5977	35.5977									1	14	10	16.5548	14.6195	0.892209	8.59538	51.9207	48.0793
	1	12	460	9.26325	7.63336	0.850038	4.20075	45.3486	45.3486									1	19	230	6.029	4.81675	0.845258	2.15109	35.6791	35.6791									1	1	18	10.0219	8.58122	0.881676	5.18096	51.6963	48.3037
	1	1	151	8.04117	6.50457	0.835382	4.3928	54.6288	45.3712									1	8	185	11.7849	10.2534	0.907835	7.57255	64.2563	35.7437									1	15	53	11.0208	9.71257	0.903636	5.68768	51.6088	48.3912
	1	3	429	7.04107	5.72166	0.847341	3.84474	54.6045	45.3955									1	18	6	6.819	5.90234	0.927168	4.35338	63.8419	36.1581									1	11	9	8.23118	7.29721	0.942925	4.24652	51.5907	48.4093
	1	1	16	9.36663	7.83531	0.86153	5.11404	54.5985	45.4015									1	16	18	5.01207	4.21255	0.914528	1.81652	36.2428	36.2428									1	2	40	8.90883	7.59115	0.889491	4.32206	48.5144	48.5144
	1	11	455	9.08419	7.83971	0.898958	4.95794	54.5777	45.4223									1	14	250	9.89058	8.18248	0.842523	6.27912	63.4859	36.5141									1	2	16	9.01161	7.70328	0.878136	4.63082	51.3873	48.6127
	1	6	79	6.88614	5.7237	0.869628	3.75748	54.5659	45.4341									1	4	9	5.25527	4.2923	0.892836	1.91983	36.5314	36.5314									1	11	14	10.0373	8.86466	0.918587	4.88494	48.6679	48.6679
	1	1	185	7.63865	6.47666	0.895467	4.16752	54.5584	45.4416									1	10	10	7.37412	6.14649	0.867638	2.69954	36.6083	36.6083									1	5	3	10.8695	9.45464	0.892595	5.29508	48.715	48.715
	1	5	22	7.76452	6.80641	0.934323	4.23589	54.5545	45.4455									1	5	22	7.76062	6.23388	0.832955	2.84109	36.609	36.609									1	10	8	8.8686	7.71573	0.914842	4.33482	48.8783	48.8783
	1	2	17	8.45942	7.41492	0.910972	3.84775	45.4848	45.4848									1	16	14	8.29901	7.12921	0.891479	3.04691	36.7142	36.7142									1	8	17	8.86293	7.9995	0.955113	4.33476	48.9089	48.9089
	1	15	36	8.36219	6.80217	0.839627	3.80459	45.4975	45.4975									1	16	19	7.40381	6.34883	0.899713	2.71928	36.7281	36.7281									1	10	13	11.2674	9.46878	0.862575	5.51194	48.9195	48.9195
	1	5	6	8.0818	6.76517	0.875437	4.40232	54.4721	45.5279									1	2	3	9.39443	8.03663	0.888626	3.46743	36.9094	36.9094									1	3	7	10.8802	9.21882	0.869886	5.53335	50.8572	49.1428
	1	14	8	6.35256	5.40938	0.904913	2.89236	45.5307	45.5307									1	17	10	6.29012	5.43858	0.930589	2.32557	36.9718	36.9718									1	2	18	6.32191	5.30879	0.920261	3.10817	49.165	49.165
	1	6	442	11.6835	9.49616	0.828946	6.36227	54.455	45.545									1	2	2	6.37919	5.5487	0.91775	4.00037	62.7097	37.2903									1	6	5	6.64036	5.64017	0.890994	3.37428	50.8147	49.1853
	1	14	483	8.47318	7.07595	0.862619	3.86076	45.5644	45.5644									1	2	24	12.9804	11.4666	0.917997	4.84359	37.3147	37.3147									1	6	55	9.57261	7.97106	0.878937	4.7153	49.2583	49.2583
	1	15	10	8.79305	7.28946	0.861754	4.78493	54.4172	45.5828									1	8	13	7.39377	6.66366	0.960277	2.77658	37.553	37.553									1	11	49	13.91	12.1456	0.890931	6.8579	49.3021	49.3021
	1	5	516	6.16466	4.98875	0.840313	2.81107	45.5998	45.5998									1	7	11	7.31771	6.2463	0.905317	2.7504	37.5855	37.5855									1	8	15	8.34505	7.46032	0.9453	4.11551	49.3168	49.3168
	1	15	32	8.14417	6.87199	0.880211	3.71677	45.6371	45.6371									1	18	1	5.82131	5.02849	0.912763	2.19142	37.6448	37.6448									1	10	2	8.275	7.06298	0.902315	4.081	49.3173	49.3173
	1	15	556	8.21078	6.7917	0.853663	3.75023	45.6745	45.6745									1	2	29	6.59382	5.53625	0.893199	2.48537	37.6925	37.6925									1	1	22	5.33003	4.58543	0.915681	2.62976	49.3385	49.3385
	1	1	254	8.66271	7.07588	0.835491	4.70526	54.3162	45.6838									1	19	228	10.1988	8.66569	0.878228	3.84664	37.7166	37.7166									1	13	6	10.5803	9.18352	0.89233	5.35252	50.5895	49.4105
	1	3	61	6.41344	5.47648	0.909728	2.93078	45.6974	45.6974									1	3	12	5.18516	4.3903	0.921839	3.22262	62.1509	37.8491									1	2	28	6.8843	5.85955	0.903745	3.40271	49.427	49.427
	1	1	182	7.36078	6.09209	0.870155	3.99351	54.2539	45.7461									1	2	39	7.8816	6.73097	0.903863	2.99328	37.9781	37.9781									1	3	8	7.31447	6.37084	0.917212	3.69781	50.5548	49.4452
	1	6	520	7.6955	6.37257	0.889267	3.52066	45.7496	45.7496									1	19	94	11.933	10.0722	0.883618	4.53596	38.0118	38.0118									1	2	7	10.4982	9.01551	0.875701	5.29802	50.4661	49.5339
	1	13	7	6.64521	5.72686	0.927197	3.60288	54.2177	45.7823									1	5	177	7.16229	6.23378	0.917021	2.72866	38.0976	38.0976									1	2	5	6.70567	5.80283	0.918274	3.32609	49.6011	49.6011
	1	4	1	10.7134	9.47445	0.91972	5.80622	54.1957	45.8043									1	19	93	3.7531	3.03117	0.86262	1.44112	38.398	38.398									1	14	9	8.74825	7.45721	0.892591	4.34159	49.6282	49.6282
	1	1	273	7.93359	6.56441	0.852455	3.63751	45.8494	45.8494									1	16	7	6.60834	5.4419	0.840249	4.06971	61.5844	38.4156									1	15	11	8.68102	7.66297	0.935608	4.36046	50.2298	49.7702
	1	6	438	7.88078	6.4873	0.861787	3.61744	45.9021	45.9021									1	5	46	6.54758	5.72148	0.928656	2.52226	38.522	38.522									1	14	17	12.8231	11.1886	0.901743	6.43878	50.2124	49.7876
	1	12	1	8.80213	7.64512	0.893912	4.76116	54.0909	45.9091									1	19	103	6.15753	5.15339	0.870658	2.38536	38.7388	38.7388									1	9	10	7.57675	6.49309	0.909694	3.80442	50.2117	49.7883
	1	14	16	7.78638	6.56989	0.892572	4.21031	54.0728	45.9272									1	15	1	7.72505	6.5129	0.876808	4.7318	61.2527	38.7473									1	11	12	7.72048	6.81298	0.93276	3.84927	49.8579	49.8579
	1	7	7	9.25855	7.74023	0.866085	4.25402	45.9469	45.9469									1	10	247	11.461	9.83888	0.905213	4.44926	38.821	38.821									1	10	6	10.0839	8.95986	0.928132	5.03074	49.889	49.889
	1	14	537	5.74641	4.67384	0.845	3.1059	54.0494	45.9506									1	2	4	9.13899	7.63943	0.861515	5.58674	61.1308	38.8692									2	1	12	6.34196	5.31333	0.890557		0	0
	1	2	18	6.47321	5.46359	0.88886	3.49811	54.0398	45.9602									1	12	23	8.01843	6.97427	0.885903	4.88636	60.9392	39.0608									2	1	16	11.9885	10.2749	0.891136		0	0
	1	3	36	6.80792	5.36006	0.827525	3.67764	54.02	45.98									1	16	219	10.3048	8.36437	0.828796	6.26334	60.781	39.219									2	1	23	4.11826	3.39289	0.893319		0	0
	1	12	75	7.6561	6.49632	0.887711	4.13569	54.0182	45.9818									1	7	7	18.68	16.7032	0.88977	7.39792	39.6035	39.6035									2	2	2	6.12674	5.2001	0.911161		0	0
	1	6	436	7.96721	6.50254	0.836877	3.66452	45.995	45.995									1	8	10	6.08296	5.21927	0.908147	3.67312	60.3838	39.6162									2	2	16	5.8201	4.76026	0.884328		0	0
	1	1	496	7.47872	6.17261	0.843211	3.44195	46.0233	46.0233									1	10	25	4.78844	3.91609	0.878856	1.89719	39.6202	39.6202									2	2	30	9.60076	8.19867	0.885774		0	0
	1	14	545	7.48422	6.21576	0.883733	3.44743	46.0626	46.0626									1	4	6	5.22372	4.49103	0.935164	3.13837	60.0792	39.9208									2	2	43	7.8273	6.46359	0.857285		0	0
	1	5	25	6.08398	5.25644	0.918844	2.80458	46.0977	46.0977									1	5	31	7.17034	6.13243	0.899882	2.87111	40.0415	40.0415									2	2	44	3.87193	3.26629	0.910959		0	0
	1	13	531	7.13339	5.63271	0.817196	3.84373	53.8837	46.1163									1	19	227	17.9329	15.1275	0.859764	10.6507	59.3919	40.6081									2	2	46	5.53708	4.75552	0.928165		0	0
	1	14	488	6.72895	5.37392	0.842299	3.62259	53.8359	46.1641									1	8	12	10.1951	9.13404	0.928341	6.04489	59.292	40.708									2	2	49	8.47193	7.17174	0.879503		0	0
	1	15	13	6.97937	5.78988	0.879332	3.22314	46.1809	46.1809									1	12	211	4.70551	3.88489	0.836619	2.78908	59.2727	40.7273									2	2	63	6.50147	5.50632	0.904184		0	0
	1	3	24	7.84158	6.76018	0.914848	3.62171	46.186	46.186									1	13	11	13.881	12.3349	0.915284	8.19356	59.0272	40.9728									2	2	68	5.06644	4.22615	0.906636		0	0
	1	14	482	7.29201	6.013	0.867348	3.92397	53.812	46.188									1	7	15	8.0322	7.07192	0.92545	3.29168	40.9811	40.9811									2	2	78	3.98956	3.09152	0.826819		0	0
	1	6	440	8.35728	6.73186	0.834051	4.49531	53.7892	46.2108									1	10	42	5.55409	4.56654	0.869741	3.26761	58.8325	41.1675									2	2	92	5.33428	4.45581	0.89517		0	0
	1	1	223	10.7596	8.99343	0.859323	5.7849	53.7649	46.2351									1	15	12	8.36261	6.52161	0.800081	3.44365	41.1791	41.1791									2	2	158	4.513	3.58984	0.854859		0	0
	1	1	238	8.59317	7.2881	0.875735	3.97387	46.2445	46.2445									1	6	26	6.06105	5.15893	0.917473	3.55479	58.6498	41.3502									2	2	165	5.53254	4.5025	0.855929		0	0
	1	1	28	6.12363	4.86036	0.844767	3.28937	53.716	46.284									1	6	19	9.73655	8.1846	0.873706	5.69956	58.5377	41.4623									2	3	5	4.26364	3.46836	0.878961		0	0
	1	1	31	6.64905	5.25945	0.83373	3.5692	53.6799	46.3201									1	10	37	5.95662	4.72468	0.829455	3.48671	58.5351	41.4649									2	3	32	11.2062	9.21856	0.827757		0	0
	1	3	5	6.07126	4.93795	0.85665	3.25868	53.6738	46.3262									1	10	191	7.7566	6.57364	0.898867	4.53879	58.5153	41.4847									2	3	33	8.141	6.58948	0.843222		0	0
	1	1	272	6.88287	5.64243	0.848517	3.69102	53.6262	46.3738									1	4	5	8.89492	7.8172	0.921317	5.20348	58.4994	41.5006									2	3	49	12.8428	10.99	0.872573		0	0
	1	2	5	6.40417	5.4721	0.91153	3.43371	53.6169	46.3831									1	11	207	8.40425	6.86079	0.843107	4.91037	58.4272	41.5728									2	3	50	5.93441	4.83495	0.857014		0	0
	1	14	546	7.6224	6.20458	0.848302	3.53658	46.3972	46.3972									1	7	3	4.19988	3.4496	0.911234	2.43835	58.0576	41.9424									2	3	55	6.25013	5.28922	0.891493		0	0
	1	14	485	6.49851	5.24506	0.832725	3.02087	46.4856	46.4856									1	10	197	6.61781	5.36159	0.836524	3.82581	57.8109	42.1891									2	3	60	5.13418	4.25868	0.884813		0	0
	1	5	26	8.90854	7.44769	0.880422	4.14249	46.5002	46.5002									1	18	3	7.69822	6.62674	0.896591	4.44394	57.7268	42.2732									2	3	64	9.50869	7.62459	0.825323		0	0
	1	7	4	10.1027	8.56394	0.874984	5.40441	53.495	46.505									1	11	5	6.32011	5.29665	0.890186	3.6439	57.6557	42.3443									2	3	76	6.55683	5.40318	0.865657		0	0
	1	6	67	8.89399	7.37796	0.860709	4.13624	46.506	46.506									1	10	21	8.96269	7.61881	0.882512	3.80004	42.3984	42.3984									2	3	84	6.77528	5.48563	0.832849		0	0
	1	1	59	8.31073	6.76895	0.845574	4.44417	53.4751	46.5249									1	10	41	9.86594	8.58546	0.901148	5.67239	57.4947	42.5053									2	3	85	5.86403	4.58688	0.818441		0	0
	1	11	454	9.52766	7.97889	0.864352	5.09399	53.4653	46.5347									1	6	14	4.41788	3.70722	0.923314	1.88092	42.5752	42.5752									2	3	173	5.0912	4.1906	0.874371		0	0
	1	12	56	5.43897	4.31294	0.854232	2.90761	53.4588	46.5412									1	12	14	7.21037	5.80391	0.814496	3.07178	42.6022	42.6022									2	3	241	7.54762	6.32006	0.86103		0	0
	1	14	540	7.70767	6.33033	0.84502	4.12008	53.4543	46.5457									1	14	65	7.63163	6.66591	0.895931	3.25663	42.6728	42.6728									2	4	6	7.32412	6.15801	0.903803		0	0
	1	4	11	8.72236	7.70957	0.930224	4.66152	53.4433	46.5567									1	19	90	8.0184	6.79165	0.877098	4.57303	57.0317	42.9683									2	4	10	7.67917	6.44556	0.880404		0	0
	1	12	9	10.6921	9.1755	0.879876	4.9801	46.5775	46.5775									1	19	84	7.21219	6.12801	0.882448	3.10291	43.0232	43.0232									2	4	11	5.87975	5.03029	0.904167		0	0
	1	3	515	8.18508	6.87862	0.887931	4.36955	53.3843	46.6157									1	19	258	6.9785	5.66282	0.856818	3.00242	43.0238	43.0238									2	4	12	5.48442	4.5751	0.891384		0	0
	1	13	21	10.669	9.2398	0.891354	5.69337	53.3638	46.6362									1	6	17	9.00927	7.67533	0.875154	3.88625	43.1361	43.1361									2	4	31	9.60871	7.98175	0.868747		0	0
	1	15	555	6.85289	5.75492	0.876606	3.19683	46.6494	46.6494									1	1	27	9.43778	8.21579	0.903883	4.08008	43.2314	43.2314									2	4	40	6.18868	5.23946	0.906416		0	0
	1	14	490	5.93138	4.84224	0.862866	3.16397	53.3429	46.6571									1	14	15	6.85781	5.95061	0.920123	3.87871	56.559	43.441									2	4	41	4.17187	3.21389	0.826866		0	0
	1	15	17	8.43442	7.29109	0.916174	3.93747	46.6833	46.6833									1	10	195	6.53635	5.40917	0.845536	3.69438	56.5205	43.4795									2	4	45	4.47194	3.54686	0.836304		0	0
	1	15	45	8.48334	7.30793	0.916438	4.52029	53.2844	46.7156									1	3	15	8.14578	7.21135	0.929372	3.55433	43.634	43.634									2	4	48	4.46539	3.55307	0.865385		0	0
	1	11	456	8.41182	7.10115	0.865562	4.48138	53.2748	46.7252									1	10	48	8.7101	7.40732	0.866522	4.90902	56.3601	43.6399									2	4	52	6.46453	5.49733	0.90141		0	0
	1	3	38	10.2576	8.36397	0.832838	5.45987	53.2274	46.7726									1	9	13	9.05691	7.51851	0.86431	3.95347	43.6514	43.6514									2	4	57	6.15337	4.86323	0.829159		0	0
	1	9	524	11.5419	9.75668	0.870274	6.13944	53.1926	46.8074									1	2	46	6.99915	5.89456	0.880948	3.06176	43.7447	43.7447									2	4	68	6.00936	5.11316	0.899574		0	0
	1	1	172	6.39158	5.22894	0.878715	3.3992	53.1825	46.8175									1	16	17	6.6409	5.60644	0.905182	3.73568	56.2526	43.7474									2	4	72	8.4455	7.29353	0.910137		0	0
	1	5	435	7.91565	6.75946	0.883452	4.20792	53.1595	46.8405									1	19	234	7.18226	6.00376	0.880537	4.02763	56.0775	43.9225									2	4	73	5.41606	4.31744	0.847538		0	0
	1	15	21	6.87262	5.88693	0.904327	3.21951	46.8454	46.8454									1	2	11	8.52703	6.85873	0.856312	4.78096	56.0684	43.9316									2	4	83	5.28303	4.13666	0.835513		0	0
	1	4	6	8.6915	7.38184	0.88683	4.07311	46.8631	46.8631									1	10	14	7.14288	5.78087	0.842974	4.00336	56.0469	43.9531									2	4	92	5.61863	4.81814	0.911198		0	0
	1	2	21	5.93293	5.16126	0.935929	3.15239	53.1338	46.8662									1	10	47	6.18262	4.93308	0.829727	2.72059	44.0039	44.0039									2	4	112	4.06047	3.2601	0.862829		0	0
	1	12	462	8.71116	7.37143	0.876494	4.08267	46.8671	46.8671									1	12	26	9.46653	8.21858	0.890746	4.16568	44.0043	44.0043									2	4	111	4.52196	3.64595	0.867259		0	0
	1	1	115	6.33152	5.1139	0.86571	3.36277	53.1115	46.8885									1	10	193	8.34834	7.18529	0.896383	3.67895	44.0681	44.0681									2	4	177	6.63567	5.32545	0.841448		0	0
	1	8	1	14.7727	12.9731	0.90466	7.84556	53.1085	46.8915									1	11	14	7.88977	6.69354	0.894487	3.47693	44.0689	44.0689									2	5	2	6.85375	5.76019	0.89251		0	0
	1	7	9	7.89614	6.78914	0.896159	4.19332	53.1059	46.8941									1	2	12	6.18833	5.17826	0.903532	3.45034	55.7556	44.2444									2	5	3	15.9556	14.1179	0.912636		0	0
	1	10	8	11.7727	10.2347	0.900835	5.52112	46.8977	46.8977									1	1	16	5.85922	4.73524	0.8736	3.26637	55.7476	44.2524									2	5	5	5.84634	5.02382	0.923287		0	0
	1	15	14	8.34498	7.28542	0.918622	4.43125	53.1008	46.8992									1	7	6	10.367	9.1211	0.907395	5.76794	55.6377	44.3623									2	6	5	4.19119	3.41141	0.885009		0	0
	1	1	20	6.38815	5.33786	0.880365	2.99723	46.9187	46.9187									1	12	248	8.53945	7.35857	0.898208	4.74753	55.5953	44.4047									2	6	13	6.75039	5.72331	0.898181		0	0
	1	12	156	7.24404	6.09811	0.879182	3.84452	53.0715	46.9285									1	16	2	5.32256	4.44301	0.894555	2.9557	55.5315	44.4685									2	6	15	6.17071	4.97315	0.835206		0	0
	1	9	446	8.92503	7.32113	0.855156	4.18962	46.9423	46.9423									1	18	254	14.6918	12.9064	0.885399	8.14286	55.4246	44.5754									2	6	18	6.20384	5.09657	0.864364		0	0
	1	12	467	7.88251	6.36076	0.82586	3.70116	46.954	46.954									1	2	31	6.55857	5.16219	0.841053	3.63086	55.3606	44.6394									2	6	22	6.90492	5.48212	0.822989		0	0
	1	15	1	7.08307	6.00618	0.902276	3.75535	53.0186	46.9814									1	16	15	9.1871	8.03791	0.915194	5.08441	55.343	44.657									2	6	38	6.94911	6.11388	0.922375		0	0
	1	12	153	8.28624	6.78507	0.850753	4.39155	52.9981	47.0019									1	12	30	6.38938	5.44253	0.895065	2.87297	44.9647	44.9647									2	6	45	6.68674	5.83153	0.926903		0	0
	1	15	20	9.86921	8.50639	0.883544	4.63942	47.009	47.009									1	4	11	8.08607	6.84769	0.89213	4.44524	54.974	45.026									2	6	60	7.9706	6.77216	0.894768		0	0
	1	6	439	10.0659	8.54715	0.893406	5.33125	52.9634	47.0366									1	5	12	8.57148	6.95838	0.863155	3.86296	45.0676	45.0676									2	6	179	7.50838	6.00464	0.834102		0	0
	1	4	431	8.41397	6.82542	0.810267	3.96024	47.0675	47.0675									1	11	208	12.2294	10.0657	0.83933	5.51796	45.1204	45.1204									2	6	185	7.07451	5.77009	0.859358		0	0
	1	13	28	10.414	9.08279	0.896156	4.90315	47.0824	47.0824									1	12	6	6.36454	5.51666	0.924872	2.87832	45.2243	45.2243									2	7	16	8.72406	5.17957	0.639759		0	0
	1	1	8	8.49613	7.27675	0.890886	4.00042	47.0852	47.0852									1	10	20	14.3258	12.3364	0.882304	6.48141	45.2431	45.2431									2	7	19	7.00522	5.74826	0.859805		0	0
	1	2	13	7.49239	6.58117	0.932382	3.96277	52.8907	47.1093									1	2	45	6.22568	5.42068	0.921703	2.81726	45.2522	45.2522									2	7	41	5.77012	4.88434	0.907547		0	0
	1	14	544	7.57494	6.25661	0.879965	3.56967	47.1247	47.1247									1	10	35	8.63979	7.02541	0.852944	4.72761	54.7191	45.2809									2	7	55	4.27386	3.35769	0.839829		0	0
	1	1	21	6.58351	5.39683	0.84284	3.10356	47.1415	47.1415									1	1	4	11.2932	9.81748	0.888262	6.16957	54.6309	45.3691									2	7	75	5.01918	3.8778	0.842238		0	0
	1	2	15	6.48404	5.49442	0.904474	3.42705	52.8535	47.1465									1	10	32	10.4247	8.84987	0.86839	4.74515	45.5184	45.5184									2	7	82	4.27729	3.37615	0.863041		0	0
	1	9	17	7.57431	6.46944	0.892634	4.0013	52.8273	47.1727									1	19	7	4.95251	3.84204	0.827786	2.25851	45.6033	45.6033									2	7	93	4.9365	4.11852	0.900301		0	0
	1	1	510	6.98188	5.79077	0.874784	3.68816	52.8248	47.1752									1	16	23	6.93093	5.87241	0.871114	3.16463	45.6595	45.6595									2	7	97	6.79088	5.5002	0.826316		0	0
	1	5	2	9.9802	8.41299	0.852376	4.70958	47.1892	47.1892									1	12	10	7.09677	5.98566	0.896421	3.24278	45.6937	45.6937									2	7	190	10.0218	8.57728	0.905619		0	0
	1	6	77	6.45821	5.47906	0.898869	3.41016	52.8034	47.1966									1	3	14	7.73855	6.58373	0.901401	4.19699	54.2348	45.7652									2	7	192	6.19956	4.91364	0.841734		0	0
	1	6	68	8.31995	7.03682	0.882136	3.92747	47.2054	47.2054									1	7	10	8.36409	7.12097	0.887439	4.52574	54.1091	45.8909									2	8	18	9.97911	8.58761	0.904599		0	0
	1	3	64	5.62341	4.66063	0.885484	2.96798	52.779	47.221									1	19	87	4.92203	4.05977	0.872593	2.2602	45.9201	45.9201									2	8	24	9.57123	8.35604	0.91814		0	0
	1	2	1	8.57152	7.38028	0.891866	4.52069	52.7408	47.2592									1	19	27	7.80265	6.58847	0.888749	3.58409	45.9343	45.9343									2	8	33	4.47321	3.75888	0.909742		0	0
	1	3	45	6.48616	5.60327	0.923365	3.06601	47.2701	47.2701									1	16	8	11.9458	10.2744	0.88536	5.48732	45.9351	45.9351									2	8	35	6.46993	5.5527	0.913607		0	0
	1	15	43	9.37359	7.47971	0.807228	4.9414	52.7162	47.2838									1	14	18	9.37197	8.26685	0.918282	5.06415	54.0351	45.9649									2	8	37	5.6982	4.85878	0.916394		0	0
	1	15	39	7.5225	6.39529	0.904697	3.96486	52.7066	47.2934									1	4	13	9.7959	8.56089	0.885874	4.51893	46.1308	46.1308									2	8	39	6.0607	5.17244	0.919383		0	0
	1	1	1	7.10744	5.94607	0.882189	3.74539	52.6967	47.3033									1	8	3	6.99131	6.27855	0.960301	3.76538	53.8579	46.1421									2	8	41	4.93642	3.91183	0.851546		0	0
	1	15	8	10.0971	8.61429	0.886069	5.31969	52.6851	47.3149									1	6	9	8.88391	7.41918	0.86043	4.09952	46.1455	46.1455									2	8	45	7.31814	6.02821	0.87163		0	0
	1	6	66	6.17872	4.93118	0.83625	2.92544	47.3469	47.3469									1	10	200	9.15883	7.53142	0.844852	4.92425	53.7651	46.2349									2	8	53	6.77203	5.4103	0.823187		0	0
	1	12	127	7.90421	6.27655	0.822291	3.74439	47.3721	47.3721									1	11	18	7.02513	6.06226	0.912983	3.25086	46.2748	46.2748									2	8	68	5.30029	4.24751	0.835383		0	0
	1	1	47	7.92197	6.82138	0.895398	4.16881	52.6234	47.3766									1	5	178	9.89257	8.25299	0.861045	4.58093	46.3068	46.3068									2	8	69	6.47448	5.29552	0.867369		0	0
	1	14	17	6.27797	5.38201	0.908205	2.97487	47.3858	47.3858									1	17	222	9.32599	7.74908	0.846255	5.00676	53.6861	46.3139									2	8	75	8.89497	7.19855	0.836944		0	0
	1	3	49	9.58193	7.9785	0.858518	4.54145	47.396	47.396									1	19	226	8.16915	6.76096	0.854799	4.38426	53.6685	46.3315									2	8	81	4.65623	3.91112	0.90114		0	0
	1	1	492	10.1953	8.38249	0.851933	4.83554	47.4289	47.4289									1	5	23	7.25735	6.12739	0.886846	3.36372	46.3492	46.3492									2	8	100	6.25377	5.27208	0.891166		0	0
	1	12	472	7.19613	5.93134	0.844422	3.41353	47.4356	47.4356									1	10	198	11.8225	9.97774	0.842185	6.33174	53.5565	46.4435									2	8	106	4.99763	4.15476	0.888137		0	0
	1	10	11	6.73131	5.85059	0.92679	3.19342	47.4413	47.4413									1	6	183	7.65839	6.45227	0.854781	4.0994	53.5282	46.4718									2	8	109	9.86266	8.63006	0.915294		0	0
	1	15	3	9.76347	8.05844	0.857001	5.12626	52.5045	47.4955									1	9	9	10.8796	9.38493	0.882773	5.05713	46.4826	46.4826									2	8	110	6.34042	5.17895	0.86215		0	0
	1	15	2	5.68696	4.79555	0.894723	2.98288	52.4513	47.5487									1	9	2	7.25904	6.11934	0.893239	3.87957	53.4446	46.5554									2	9	5	5.49571	4.79454	0.928251		0	0
	1	12	147	9.7784	8.19922	0.866677	5.12848	52.447	47.553									1	5	28	8.95906	7.5461	0.875611	4.18163	46.6749	46.6749									2	9	15	7.29268	6.2945	0.904523		0	0
	1	13	22	5.39769	4.44327	0.884917	2.82987	52.4274	47.5726									1	19	231	20.4998	17.5274	0.875642	9.58521	46.7575	46.7575									2	9	19	3.99901	3.30845	0.908787		0	0
	1	11	10	8.34404	6.82693	0.865214	4.37316	52.4105	47.5895									1	4	10	8.81002	7.4862	0.891916	4.1314	46.8944	46.8944									2	9	20	8.45154	6.80898	0.820746		0	0
	1	1	511	7.79927	6.40368	0.84506	3.71312	47.6086	47.6086									1	13	2	11.2344	9.36322	0.848774	5.27649	46.9672	46.9672									2	9	22	5.84866	4.97397	0.905564		0	0
	1	12	158	8.63109	7.36207	0.882435	4.52122	52.3829	47.6171									1	17	11	8.09617	7.13001	0.928424	3.80469	46.9937	46.9937									2	9	29	7.88146	6.74009	0.898077		0	0
	1	14	214	5.00453	3.95561	0.827375	2.3836	47.6289	47.6289									1	13	4	8.25543	6.96806	0.890293	4.3718	52.9567	47.0433									2	9	30	6.73041	5.71582	0.905784		0	0
	1	5	9	11.4864	9.82353	0.880878	6.0126	52.3455	47.6545									1	5	41	8.69701	7.16124	0.857755	4.59862	52.8759	47.1241									2	9	32	5.25253	4.5403	0.932948		0	0
	1	1	274	9.08134	7.6373	0.86941	4.7533	52.3414	47.6586									1	14	2	10.4647	9.22295	0.910867	4.93795	47.1865	47.1865									2	9	33	6.77126	5.85094	0.914246		0	0
	1	11	2	7.03886	5.86773	0.903513	3.35463	47.6587	47.6587									1	19	224	7.55414	6.21899	0.861392	3.98082	52.6972	47.3028									2	9	36	9.82301	8.4599	0.897153		0	0
	1	2	16	8.84003	7.59729	0.902376	4.62402	52.3077	47.6923									1	15	251	7.65183	6.2796	0.844995	4.03079	52.6775	47.3225									2	9	46	6.05708	5.08212	0.904244		0	0
	1	14	553	7.02151	5.65996	0.834325	3.34908	47.6974	47.6974									1	16	1	5.54771	4.7601	0.921434	2.92186	52.6679	47.3321									2	9	54	4.99351	4.24257	0.918197		0	0
	1	14	480	6.5833	5.50715	0.883047	3.14225	47.7306	47.7306									1	18	7	9.93957	8.85276	0.911251	5.23212	52.6393	47.3607									2	9	59	5.94097	4.85313	0.875939		0	0
	1	6	75	10.6764	9.07269	0.876447	5.09818	47.7517	47.7517									1	7	2	8.41402	7.49195	0.910701	4.42456	52.5856	47.4144									2	9	66	5.46156	4.57255	0.887929		0	0
	1	15	25	8.8012	7.70657	0.913378	4.59795	52.2423	47.7577									1	12	1	8.20603	7.10389	0.904523	3.89514	47.4668	47.4668									2	9	68	5.22667	4.3412	0.896794		0	0
	1	1	498	10.9608	9.11483	0.847715	5.23594	47.7698	47.7698									1	5	4	15.4517	13.4535	0.893203	7.33916	47.4974	47.4974									2	9	70	6.07983	5.14604	0.90058		0	0
	1	11	12	9.05775	7.82737	0.899535	4.32765	47.7784	47.7784									1	2	22	8.76035	6.98326	0.814539	4.16253	47.5156	47.5156									2	9	208	5.6969	4.73567	0.888307		0	0
	1	3	34	8.49659	7.02348	0.856628	4.07344	47.9421	47.9421									1	6	179	11.2785	9.70359	0.882871	5.9177	52.4688	47.5312									2	9	209	6.38259	5.35481	0.892359		0	0
	1	7	2	9.74842	8.24905	0.877744	5.07247	52.0338	47.9662									1	6	35	7.62062	6.63291	0.91147	3.99569	52.4325	47.5675									2	10	4	12.6429	10.7151	0.872884		0	0
	1	1	493	9.37094	7.8921	0.86442	4.872	51.9905	48.0095									1	2	9	9.0252	7.29604	0.823286	4.73114	52.4214	47.5786									2	10	6	4.53281	3.77558	0.892785		0	0
	1	12	528	7.61539	6.25248	0.845009	3.95905	51.9874	48.0126									1	5	36	13.1497	10.7131	0.818617	6.87837	52.3082	47.6918									2	10	9	6.38763	5.38492	0.899188		0	0
	1	5	13	8.87041	7.68951	0.905797	4.61104	51.9823	48.0177									1	5	33	6.77546	5.83562	0.922231	3.23175	47.6979	47.6979									2	10	13	4.66305	3.91495	0.89357		0	0
	1	4	13	9.94487	8.75367	0.923006	4.77816	48.0465	48.0465									1	1	1	8.63468	7.21554	0.899582	4.12122	47.7287	47.7287									2	10	16	7.16402	6.06436	0.879629		0	0
	1	1	269	8.63015	7.30252	0.877031	4.1473	48.0559	48.0559									1	2	26	9.40163	8.25831	0.925967	4.90904	52.2148	47.7852									2	10	21	15.626	13.5211	0.882491		0	0
	1	1	287	8.2995	6.97348	0.870269	4.30968	51.9269	48.0731									1	16	24	11.9055	10.1037	0.876378	5.69971	47.8747	47.8747									2	10	29	6.41497	5.40898	0.877251		0	0
	1	12	157	7.60015	6.47835	0.896639	3.65901	48.144	48.144									1	4	4	9.40594	8.32513	0.925029	4.89908	52.0849	47.9151									2	10	35	5.62423	4.64905	0.871298		0	0
	1	1	318	7.04509	5.92905	0.885637	3.3943	48.1797	48.1797									1	14	20	17.9407	16.0663	0.915764	9.34201	52.0717	47.9283									2	10	36	5.91726	4.95473	0.889664		0	0
	1	2	14	6.46013	5.48318	0.903851	3.34763	51.8199	48.1801									1	2	35	6.13194	5.24536	0.922604	2.94792	48.0747	48.0747									2	10	43	5.7031	4.76427	0.867257		0	0
	1	15	29	6.98324	5.99937	0.911216	3.61802	51.8101	48.1899									1	3	175	9.06807	7.76504	0.900724	4.70482	51.8833	48.1167									2	10	54	8.63179	7.44982	0.896264		0	0
	1	1	501	10.6358	8.84994	0.848377	5.50996	51.8059	48.1941									1	19	232	7.1177	5.92755	0.866384	3.42854	48.1693	48.1693									2	10	211	6.52952	5.2041	0.824586		0	0
	1	7	11	8.73444	7.50243	0.905324	4.21056	48.2064	48.2064									1	12	20	7.89779	6.5595	0.862297	4.09271	51.8209	48.1791									2	10	219	8.44259	7.14287	0.877169		0	0
	1	11	18	6.95314	5.95913	0.916319	3.35469	48.2471	48.2471									1	11	9	9.22366	7.97772	0.904264	4.77491	51.7681	48.2319									2	10	256	7.40188	6.24427	0.898139		0	0
	1	1	497	7.39427	6.01858	0.839354	3.56754	48.2474	48.2474									1	6	245	5.17014	4.27727	0.86107	2.67333	51.7072	48.2928									2	11	3	5.32894	4.48855	0.910271		0	0
	1	14	534	6.12438	5.17508	0.898994	3.16893	51.7428	48.2572									1	14	249	10.6925	9.02882	0.879992	5.16529	48.3076	48.3076									2	11	6	4.92691	4.11555	0.900203		0	0
	1	10	3	6.36282	5.35842	0.897216	3.07109	48.2662	48.2662									1	9	14	6.90669	5.99265	0.922139	3.33655	48.3089	48.3089									2	11	20	6.45061	5.52875	0.916215		0	0
	1	15	11	6.45564	5.52995	0.916485	3.33717	51.6939	48.3061									1	5	25	5.35327	4.53921	0.905751	2.76669	51.6823	48.3177									2	11	22	5.3383	4.61855	0.929204		0	0
	1	1	217	8.38357	6.91716	0.871284	4.33185	51.6707	48.3293									1	11	11	5.57941	4.64988	0.890345	2.88007	51.6196	48.3804									2	11	220	10.3641	8.47234	0.838031		0	0
	1	7	8	7.86966	6.76255	0.913433	3.80414	48.3393	48.3393									1	12	12	9.0651	7.41293	0.840439	4.38881	48.4143	48.4143									2	11	258	11.1576	9.51327	0.896625		0	0
	1	3	1	7.24088	6.13203	0.890533	3.74051	51.6582	48.3418									1	19	235	5.29488	4.3482	0.872121	2.56387	48.4217	48.4217									2	12	2	5.35683	4.52146	0.919079		0	0
	1	14	13	10.894	9.19286	0.863344	5.62556	51.6393	48.3607									1	5	40	11.3484	9.62032	0.867666	5.49679	48.4366	48.4366									2	12	7	5.57844	4.77796	0.919742		0	0
	1	10	7	11.0564	9.57224	0.893195	5.7085	51.6305	48.3695									1	2	37	5.56247	4.57308	0.871252	2.69519	48.4532	48.4532									2	12	8	9.15022	7.73395	0.889299		0	0
	1	5	24	8.78218	7.39656	0.865026	4.24797	48.3703	48.3703									1	2	5	10.1589	8.94857	0.910844	4.92921	48.5212	48.5212									2	12	10	8.15949	6.79625	0.865001		0	0
	1	3	3	7.72459	6.6416	0.906157	3.98727	51.6179	48.3821									1	3	4	7.20925	6.20392	0.903732	3.49912	48.5366	48.5366									2	12	24	4.72047	3.9655	0.913206		0	0
	1	1	216	9.63045	8.20741	0.875095	4.97058	51.6132	48.3868									1	13	10	8.22765	7.01437	0.89583	3.99746	48.5856	48.5856									2	12	25	5.9281	4.96492	0.89222		0	0
	1	4	2	9.03181	7.85172	0.914076	4.65872	51.5812	48.4188									1	14	19	6.72946	5.86392	0.929542	3.27026	48.5961	48.5961									2	12	32	3.28733	2.62568	0.884859		0	0
	1	6	518	9.25846	7.64256	0.854339	4.4835	48.4259	48.4259									1	10	201	7.4496	6.22344	0.874568	3.62054	48.6005	48.6005									2	13	4	5.23879	4.47129	0.926511		0	0
	1	9	449	7.21813	6.00158	0.894293	3.72259	51.5727	48.4273									1	6	180	7.92177	6.95123	0.92836	3.85118	48.6151	48.6151									2	13	5	6.57517	5.47381	0.889397		0	0
	1	1	509	7.44524	6.256	0.877457	3.83823	51.5528	48.4472									1	5	48	4.93984	4.03319	0.910574	2.53568	51.3312	48.6688									2	13	14	6.07969	4.87156	0.866405		0	0
	1	11	17	9.21247	7.80413	0.89448	4.46478	48.4645	48.4645									1	6	1	4.3199	3.59427	0.897836	2.10649	48.7624	48.7624									2	13	23	3.87534	3.17905	0.901952		0	0
	1	1	280	6.27159	5.25713	0.877472	3.23182	51.5312	48.4688									1	16	11	10.2932	8.3941	0.846804	5.26128	51.1141	48.8859									2	13	24	4.27332	3.62813	0.926284		0	0
	1	11	11	8.55725	7.46529	0.92271	4.40629	51.4918	48.5082									1	19	85	5.9832	5.02023	0.888254	2.92678	48.9167	48.9167									2	13	33	5.32697	4.38185	0.881925		0	0
	1	13	476	7.3054	6.24192	0.914339	3.54378	48.5091	48.5091									1	13	8	9.40342	8.02715	0.879468	4.60557	48.9776	48.9776									2	13	45	6.16287	5.29484	0.918044		0	0
	1	1	12	6.06477	4.96704	0.848264	2.94301	48.5263	48.5263									1	14	214	8.3476	7.0836	0.898844	4.08927	48.9874	48.9874									2	13	46	6.26748	5.19997	0.867592		0	0
	1	12	110	7.65164	6.52861	0.895661	3.93731	51.4572	48.5428									1	8	4	7.60257	6.73781	0.950761	3.87332	50.9474	49.0526									2	14	7	8.6449	7.64301	0.942995		0	0
	1	14	5	10.5915	9.04156	0.880578	5.1444	48.5708	48.5708									1	15	252	8.47517	6.97335	0.847545	4.31408	50.9026	49.0974									2	14	8	9.64615	8.51779	0.922177		0	0
	1	14	188	8.47885	6.95495	0.855863	4.35989	51.4208	48.5792									1	1	25	11.2885	9.86703	0.906451	5.54695	49.138	49.138									2	14	10	17.8442	15.892	0.932067		0	0
	1	1	229	11.4153	9.58698	0.855312	5.54558	48.5803	48.5803									1	9	1	8.38282	7.37155	0.907052	4.11932	49.14	49.14									2	14	18	3.38072	2.76447	0.907717		0	0
	1	14	10	6.92741	5.79896	0.882541	3.56177	51.4155	48.5845									1	16	6	7.50355	6.14476	0.85193	3.68736	49.1415	49.1415									2	15	7	7.78418	6.57727	0.887394		0	0
	1	1	267	6.96814	5.87751	0.88095	3.58209	51.4067	48.5933									1	11	209	6.1246	5.25093	0.902357	3.01087	49.1602	49.1602									2	15	8	5.75697	4.91451	0.919512		0	0
	1	1	512	8.10392	6.73235	0.869567	3.93813	48.5954	48.5954									1	5	29	7.06913	5.74886	0.843524	3.47706	49.1866	49.1866									2	15	9	5.43343	4.7393	0.939205		0	0
	1	12	29	5.74994	4.73671	0.860875	2.79445	48.5997	48.5997									1	10	202	7.49587	5.95561	0.820682	3.80566	50.7701	49.2299									2	15	10	6.40816	5.36216	0.893237		0	0
	1	12	468	5.96408	4.74241	0.826785	2.89872	48.6031	48.6031									1	5	51	5.44823	4.62647	0.905134	2.7646	50.7431	49.2569									2	15	11	15.2297	12.7217	0.854538		0	0
	1	1	268	10.48	8.63243	0.851731	5.09453	48.6119	48.6119									1	6	24	8.34539	6.94924	0.852897	4.23294	50.7219	49.2781									2	15	12	6.15157	5.33093	0.920957		0	0
	1	12	474	8.52136	6.97915	0.854231	4.37474	51.3385	48.6615									1	1	9	7.69651	6.66217	0.916453	3.79583	49.3189	49.3189									2	15	14	7.37767	6.12555	0.852626		0	0
	1	1	316	7.66935	6.35109	0.858377	3.73251	48.6679	48.6679									1	15	216	6.77218	5.95571	0.934147	3.43177	50.6745	49.3255									2	15	24	6.64964	5.82091	0.941717		0	0
	1	1	505	7.79675	6.55061	0.875426	4.0021	51.3303	48.6697									1	5	53	9.51658	8.34974	0.916633	4.69567	49.342	49.342									2	15	38	6.54188	5.63603	0.898351		0	0
	1	1	500	11.1708	9.3976	0.859725	5.73046	51.2988	48.7012									1	19	12	6.28137	5.15042	0.867771	3.17642	50.5689	49.4311									2	15	49	7.21558	5.80683	0.832329		0	0
	1	14	4	7.30536	6.18386	0.890457	3.56006	48.7322	48.7322									1	7	16	10.2072	8.92603	0.899163	5.14675	50.4225	49.5775									2	15	60	6.39453	5.38427	0.898901		0	0
	1	1	494	8.60532	7.1284	0.857904	4.19672	48.7689	48.7689									1	12	210	9.02337	7.85426	0.916348	4.54872	50.4105	49.5895									2	15	72	5.67338	4.54088	0.848552		0	0
	1	1	181	8.76217	7.31588	0.854314	4.27421	48.7802	48.7802									1	19	91	11.3571	9.61449	0.874446	5.6322	49.5918	49.5918									2	15	151	4.87392	3.80118	0.823543		0	0
	1	11	1	9.22206	7.75585	0.892333	4.72313	51.2156	48.7844									1	6	30	8.9227	7.77777	0.898575	4.43411	49.6947	49.6947									2	15	156	4.80728	3.89854	0.849912	4.57458	95.1593	4.84071
	1	12	469	6.38019	5.16601	0.837421	3.11286	48.7894	48.7894									1	11	7	8.27732	7.24232	0.923321	4.11376	49.6992	49.6992									2	15	19	5.37556	4.49273	0.900295	5.09023	94.6921	5.30793
	1	12	84	9.50542	7.7103	0.839166	4.6393	48.8069	48.8069									1	5	35	6.33394	5.40587	0.899404	3.1523	49.7683	49.7683									2	15	155	5.41227	4.22737	0.831713	5.08934	94.0333	5.96669
	1	14	535	8.15161	6.8133	0.86702	4.17138	51.1724	48.8276									1	5	42	5.97678	5.02228	0.891873	2.97559	49.7858	49.7858									2	10	215	5.11556	4.07405	0.852637	0.337919	6.6057	6.6057
	1	1	29	6.77304	5.5436	0.845991	3.30741	48.832	48.832									1	1	17	6.50567	5.45073	0.890985	3.24257	49.8422	49.8422									2	4	55	6.16874	4.98941	0.852151	0.462168	7.4921	7.4921
	1	1	5	10.5971	8.75912	0.838563	5.4188	51.135	48.865									1	7	13	8.56656	7.45391	0.921318	4.28945	50.072	49.928									2	2	36	6.40593	5.1474	0.840163	0.494118	7.71344	7.71344
	1	4	3	9.59437	8.2706	0.909046	4.90527	51.1266	48.8734									1	19	233	7.38382	6.13701	0.878153	3.6879	49.9458	49.9458									2	3	38	7.16868	6.04181	0.884304	6.60588	92.1491	7.85088
	1	9	3	7.49386	6.28338	0.884201	3.83103	51.1222	48.8778									2	1	30	4.82932	3.98187	0.865981		0	0									2	9	58	6.97736	6.11759	0.922372	0.556594	7.97714	7.97714
	1	1	251	5.7703	4.78244	0.879072	2.82043	48.8784	48.8784									2	1	90	6.3668	5.31178	0.872564		0	0									2	10	37	7.11118	6.01605	0.895542	0.568715	7.99748	7.99748
	1	12	4	9.83115	8.27655	0.869046	5.02516	51.1147	48.8853									2	1	110	12.3688	10.565	0.874074		0	0									2	15	3	4.56335	3.82337	0.911189	4.19007	91.8201	8.17989
	1	12	118	12.4872	10.777	0.878741	6.10623	48.8998	48.8998									2	1	293	9.0896	7.651	0.881099		0	0									2	4	82	21.3772	18.1824	0.880365	1.83705	8.5935	8.5935
	1	12	529	5.59138	4.52835	0.845076	2.85545	51.0688	48.9312									2	1	294	4.31369	3.49914	0.871478		0	0									2	13	20	7.1798	6.11425	0.892425	6.55921	91.3564	8.64357
	1	7	10	8.51228	7.58554	0.93546	4.16552	48.9355	48.9355									2	2	37	6.74104	5.57836	0.863754		0	0									2	4	56	5.10034	4.23067	0.893548	0.466649	9.14938	9.14938
	1	14	179	8.4488	6.76248	0.821259	4.13552	48.948	48.948									2	2	59	6.03561	5.13428	0.898084		0	0									2	1	20	5.37595	4.58592	0.92676	4.8179	89.6196	10.3804
	1	12	86	7.1646	6.03353	0.881573	3.65705	51.0433	48.9567									2	2	425	4.79305	3.93582	0.870891		0	0									2	9	141	5.85794	4.78561	0.841215	0.610708	10.4253	10.4253
	1	13	26	7.24828	6.25337	0.91016	3.69884	51.0305	48.9695									2	3	15	3.89902	2.9973	0.829231		0	0									2	8	58	5.4352	4.44053	0.875265	0.625772	11.5133	11.5133
	1	1	92	9.05549	7.65635	0.873093	4.62068	51.0263	48.9737									2	4	30	9.48178	7.73824	0.853548		0	0									2	7	49	23.3585	20.0544	0.862764	2.72238	11.6548	11.6548
	1	3	428	7.77535	6.29871	0.835428	3.967	51.0202	48.9798									2	4	72	5.54912	4.34029	0.822393		0	0									2	4	28	8.69398	6.95514	0.829325	7.6759	88.2898	11.7102
	1	1	45	7.85511	6.46528	0.847948	4.00753	51.0181	48.9819									2	5	315	8.34905	6.8155	0.827248		0	0									2	11	18	6.21486	5.32626	0.915808	0.736752	11.8547	11.8547
	1	3	51	6.86747	5.8832	0.911641	3.50308	51.0097	48.9903									2	7	443	9.71886	8.18476	0.900258		0	0									2	12	31	5.89908	4.99744	0.905849	0.700071	11.8675	11.8675
	1	11	7	9.04111	7.76562	0.89984	4.42948	48.9927	48.9927									2	9	10	4.50452	3.79429	0.909396		0	0									2	7	68	5.07777	4.30504	0.916161	0.603638	11.8879	11.8879
	1	6	78	7.35931	6.1688	0.881452	3.60694	49.0119	49.0119									2	9	38	4.93722	4.07377	0.871972		0	0									2	13	22	4.84129	3.98062	0.891901	4.26362	88.068	11.932
	1	10	453	7.57091	6.34323	0.874342	3.71137	49.0214	49.0214									2	9	54	6.33677	5.38428	0.899701		0	0									2	10	19	5.87956	4.90204	0.878399	0.713488	12.1351	12.1351
	1	3	40	7.71061	6.65724	0.914523	3.78136	49.0411	49.0411									2	9	56	3.9357	3.13913	0.85901		0	0									2	2	81	3.41811	2.81231	0.912869	0.414895	12.1381	12.1381
	1	5	5	8.13382	6.85679	0.876681	4.14441	50.9528	49.0472									2	9	447	6.37772	5.40541	0.901292		0	0									2	2	28	6.33309	5.34707	0.89937	5.54643	87.5787	12.4213
	1	13	1	9.41528	7.66774	0.811756	4.61984	49.0675	49.0675									2	9	448	3.41833	2.63131	0.826172		0	0									2	4	14	5.88836	4.80344	0.844616	5.15143	87.4849	12.5151
	1	5	3	7.52289	6.51506	0.916292	3.83036	50.916	49.084									2	10	29	6.56021	5.61462	0.910477		0	0									2	9	10	5.42605	4.70566	0.920084	0.682544	12.579	12.579
	1	6	437	8.36252	6.98888	0.877063	4.25421	50.8724	49.1276									2	11	15	9.4415	7.74862	0.84139		0	0									2	9	38	6.3192	5.12755	0.847549	0.798905	12.6425	12.6425
	1	5	4	6.87807	5.97691	0.920477	3.4983	50.8616	49.1384									2	11	29	9.37719	8.11757	0.907228		0	0									2	11	14	11.7955	9.96012	0.868797	10.3028	87.3452	12.6548
	1	8	3	11.0568	9.37399	0.882392	5.62215	50.8477	49.1523									2	11	74	7.47259	6.38446	0.908461		0	0									2	8	99	6.31515	4.95671	0.824872	0.807506	12.7868	12.7868
	1	1	7	6.83465	5.61343	0.864343	3.35981	49.1585	49.1585									2	11	101	4.95864	4.16321	0.90314		0	0									2	13	10	6.1271	5.19689	0.893244	5.33399	87.0558	12.9442
	1	1	17	6.27511	5.26576	0.879819	3.19022	50.8393	49.1607									2	11	230	4.75526	3.73865	0.846909		0	0									2	9	47	6.75743	5.76818	0.900819	5.87614	86.9582	13.0418
	1	7	13	7.696	6.53631	0.888448	3.78388	49.1669	49.1669									2	11	420	4.57504	3.88095	0.902225		0	0									2	2	22	4.50687	3.78102	0.905647	3.91592	86.8878	13.1122
	1	12	464	9.08912	7.76138	0.89686	4.61914	50.8206	49.1794									2	13	13	5.3667	4.17893	0.841926		0	0									2	12	30	4.14538	3.56151	0.931495	0.548053	13.2208	13.2208
	1	8	8	12.1172	10.6333	0.897003	5.96001	49.1865	49.1865									2	13	14	5.79052	4.55261	0.821072		0	0									2	13	19	7.37334	6.55452	0.94051	6.39825	86.7755	13.2245
	1	1	38	6.34591	5.28411	0.874969	3.12159	49.1906	49.1906									2	13	25	4.2505	3.42233	0.870073		0	0									2	13	27	12.9966	11.3774	0.906324	1.73445	13.3454	13.3454
	1	2	2	6.39229	5.60606	0.93085	3.14596	49.2149	49.2149									2	13	39	4.00292	3.24372	0.869503		0	0									2	13	37	4.90883	4.1524	0.909824	4.21122	85.7886	14.2114
	1	3	55	7.84224	6.76847	0.90648	3.98076	50.7605	49.2395									2	13	98	5.37366	4.2092	0.845808		0	0									2	13	49	6.97158	6.03366	0.91095	0.993506	14.2508	14.2508
	1	3	6	10.2442	8.51254	0.857055	5.04506	49.2481	49.2481									2	14	18	4.24528	3.4576	0.89719		0	0									2	6	41	5.52996	4.75541	0.918784	0.789825	14.2827	14.2827
	1	2	12	10.7036	9.47443	0.899239	5.2729	49.263	49.263									2	14	37	5.56505	4.70546	0.915378		0	0									2	8	25	6.32087	5.30467	0.886179	5.40265	85.4732	14.5268
	1	12	28	11.226	9.22777	0.824128	5.53144	49.2734	49.2734									2	15	27	6.21942	4.94636	0.831937		0	0									2	6	55	8.00413	6.85281	0.893196	6.82631	85.2849	14.7151
	1	6	64	7.73568	6.30522	0.831755	3.8124	49.2833	49.2833									2	15	44	4.68314	3.84751	0.900342		0	0									2	8	17	4.88902	3.98094	0.858177	4.16569	85.2051	14.7949
	1	1	194	9.21963	7.79514	0.880228	4.67349	50.6906	49.3094									2	15	77	10.7003	9.2509	0.891908		0	0									2	6	58	12.5152	10.7618	0.890941	1.85256	14.8025	14.8025
	1	15	491	10.6676	8.94447	0.849625	5.40664	50.6829	49.3171									2	15	367	5.3847	4.19051	0.81425		0	0									2	8	200	6.60404	5.57113	0.904818	0.984202	14.903	14.903
	1	5	1	7.39763	6.35862	0.903371	3.64893	49.3257	49.3257									2	16	7	9.94814	8.85059	0.92719		0	0									2	4	77	7.36082	6.17277	0.878593	6.25746	85.0103	14.9897
	1	11	9	9.07068	7.84284	0.901254	4.59467	50.6541	49.3459									2	17	18	7.23959	5.97703	0.880761		0	0									2	7	39	5.52284	4.64476	0.902692	0.832095	15.0664	15.0664
	1	10	9	6.04505	5.08014	0.907447	2.98308	49.3474	49.3474									2	18	13	4.36274	3.3601	0.832363		0	0									2	14	3	5.18156	4.29031	0.884396	4.3865	84.6559	15.3441
	1	14	532	7.4018	6.06618	0.840307	3.74856	50.6438	49.3562									2	18	40	7.30033	6.2363	0.898389		0	0									2	6	24	6.01676	5.12803	0.913361	5.08987	84.5949	15.4051
	1	3	2	7.23718	6.12143	0.90097	3.57459	49.392	49.392									2	18	46	4.97642	4.12747	0.88594		0	0									2	7	17	6.78489	5.8105	0.915585	1.0467	15.427	15.427
	1	1	145	6.68238	5.60271	0.876108	3.3019	49.4121	49.4121									2	18	383	3.90589	3.06158	0.859946		0	0									2	1	8	4.75286	3.98551	0.902515	0.752984	15.8428	15.8428
	1	12	112	8.91549	7.11445	0.812126	4.40576	49.417	49.417									2	19	4	5.28564	4.36759	0.882537		0	0									2	5	22	7.66371	6.60034	0.908097	1.22459	15.9791	15.9791
	1	10	452	8.88964	7.1636	0.815119	4.49224	50.5334	49.4666									2	19	23	3.79648	2.93819	0.833645		0	0									2	2	82	7.35335	6.34557	0.913401	1.18166	16.0696	16.0696
	1	3	43	6.20761	5.01428	0.835129	3.13685	50.5324	49.4676									2	19	59	4.75617	3.78844	0.866528		0	0									2	8	201	8.04641	6.81555	0.897782	6.73825	83.7424	16.2576
	1	3	430	11.3251	9.24877	0.840793	5.72271	50.5312	49.4688									2	19	62	2.09652	1.54581	0.850568		0	0									2	7	84	5.92184	4.75011	0.842037	4.95723	83.711	16.289
	1	13	25	8.21299	6.95257	0.87947	4.14977	50.5269	49.4731									2	19	96	6.43417	5.1425	0.842573		0	0									2	2	56	7.23529	6.12812	0.881954	6.0464	83.5682	16.4318
	1	9	447	7.8358	6.67346	0.910384	3.87791	49.4896	49.4896									2	19	107	6.22463	5.15869	0.872438		0	0									2	12	16	4.8837	4.10704	0.921746	0.802983	16.4421	16.4421
	1	1	211	5.55503	4.44563	0.843474	2.74921	49.4904	49.4904									2	19	142	4.4992	3.79117	0.913375		0	0									2	8	199	8.18454	6.74795	0.857199	1.35167	16.5149	16.5149
	1	15	6	6.28094	5.15191	0.841819	3.16874	50.4501	49.5499									2	19	396	4.70104	3.88726	0.873211		0	0									2	7	96	7.04637	5.64485	0.826567	5.87862	83.4277	16.5723
	1	12	100	7.3542	6.01202	0.849696	3.64709	49.5919	49.5919									2	1	82	16.8652	14.1376	0.853614	16.0733	95.3043	4.69573									2	10	44	10.82	9.31594	0.890146	1.81374	16.7628	16.7628
	1	1	88	8.28603	6.70728	0.83921	4.10943	49.5947	49.5947									2	1	428	21.219	17.7832	0.8534	20.2041	95.2169	4.7831									2	3	172	7.68898	6.49854	0.88621	1.28909	16.7654	16.7654
	1	1	307	6.49392	5.29534	0.843194	3.22207	49.6167	49.6167									2	15	39	5.35827	4.49432	0.894504	0.287601	5.36742	5.36742									2	2	72	9.26592	7.82257	0.875569	1.55556	16.7879	16.7879
	1	1	14	8.71957	7.47898	0.890003	4.32723	49.6266	49.6266									2	11	19	4.01773	3.11785	0.82967	3.79962	94.5715	5.42849									2	3	79	6.71502	5.45268	0.839282	5.58239	83.1329	16.8671
	1	5	7	6.32749	5.38064	0.911914	3.14044	49.6318	49.6318									2	13	419	9.72184	8.09446	0.860134	9.12255	93.8356	6.16438									2	7	7	6.08541	4.93982	0.848333	5.04356	82.8797	17.1203
	1	1	338	8.84748	7.4354	0.868773	4.39178	49.6388	49.6388									2	19	91	5.99797	4.75816	0.817834	5.60392	93.4304	6.56964									2	4	67	5.43325	4.65528	0.914437	0.931697	17.1481	17.1481
	1	14	552	8.33319	6.64234	0.831426	4.19659	50.36	49.64									2	19	83	6.89134	5.86279	0.891459	0.468649	6.80055	6.80055									2	6	1	6.82944	5.75984	0.880895	1.22639	17.9574	17.9574
	1	3	425	8.10757	6.73502	0.871008	4.08094	50.335	49.665									2	18	35	5.91282	4.81719	0.866461	0.402773	6.81186	6.81186									2	2	25	5.14292	4.32082	0.910511	4.21386	81.9351	18.0649
	1	11	14	10.3913	9.03005	0.897394	5.16154	49.6719	49.6719									2	13	52	9.3154	7.56312	0.830002	8.65201	92.8785	7.12152									2	3	56	5.37892	4.49344	0.8882	4.3999	81.7989	18.2011
	1	10	12	9.22005	7.9551	0.898393	4.58092	49.6844	49.6844									2	19	27	4.89679	3.99503	0.863725	0.349718	7.14178	7.14178									2	9	207	6.925	5.7869	0.899823	1.26198	18.2236	18.2236
	1	3	18	5.37496	4.48948	0.885984	2.70441	50.3151	49.6849									2	17	19	3.71231	3.03688	0.894405	0.280457	7.55477	7.55477									2	7	53	5.08476	4.25963	0.893408	0.935811	18.4042	18.4042
	1	3	59	8.14007	6.83855	0.8736	4.09395	50.2938	49.7062									2	18	43	11.4672	9.38821	0.825061	0.927783	8.09073	8.09073									2	14	19	5.33716	4.4249	0.884633	4.35028	81.5092	18.4908
	1	1	15	8.45403	6.85733	0.828398	4.25031	50.2756	49.7244									2	13	29	4.24104	3.56838	0.896266	3.87944	91.4739	8.52607									2	7	186	4.70664	3.64469	0.830897	3.83432	81.4661	18.5339
	1	12	458	9.6782	7.88756	0.834763	4.86411	50.2585	49.7415									2	14	10	4.69832	3.98221	0.948567	4.25835	90.6358	9.36425									2	10	14	4.77245	3.98122	0.897345	3.88736	81.4543	18.5457
	1	1	200	7.14173	5.78804	0.847024	3.55337	49.7551	49.7551									2	19	60	8.98816	7.73371	0.903736	8.1257	90.4044	9.59556									2	15	25	4.8578	4.05172	0.91581	0.902173	18.5717	18.5717
	1	8	2	11.1338	9.63193	0.892872	5.54218	49.778	49.778									2	8	8	6.1369	5.212	0.901059	0.601402	9.79976	9.79976									2	12	1	7.09028	6.19241	0.923124	5.76069	81.2477	18.7523
	1	15	15	8.80009	7.85526	0.943616	4.4175	50.1984	49.8016									2	5	70	7.08222	5.8351	0.859803	0.702217	9.91522	9.91522									2	2	162	5.42091	4.36669	0.847616	4.39743	81.1198	18.8802
	1	6	80	6.20996	5.15713	0.876978	3.09304	49.8078	49.8078									2	4	440	8.23031	6.77091	0.845044	7.41086	90.0435	9.95646									2	4	75	5.41736	4.45638	0.856749	4.39375	81.105	18.895
	1	14	14	6.79927	5.70964	0.880641	3.4126	50.1907	49.8093									2	14	30	5.65469	4.93566	0.939347	5.07988	89.8348	10.1652									2	7	248	7.21837	5.91457	0.845063	1.3713	18.9974	18.9974
	1	1	152	5.52026	4.67943	0.89099	2.77062	50.19	49.81									2	5	76	8.91449	7.44849	0.875828	8.00747	89.8254	10.1746									2	7	62	9.23094	7.94467	0.89487	7.47326	80.9588	19.0412
	1	1	207	6.55089	5.39086	0.868346	3.28665	50.171	49.829									2	16	4	4.9956	4.23508	0.91576	4.47097	89.498	10.502									2	3	57	6.92216	5.85743	0.887337	5.59858	80.8791	19.1209
	1	1	504	10.365	8.49961	0.847077	5.16653	49.8461	49.8461									2	7	9	5.4697	4.30323	0.860272	4.89419	89.4782	10.5218									2	4	53	4.26608	3.38685	0.854901	3.43885	80.6092	19.3908
	1	14	24	9.8567	8.29299	0.868549	4.91327	49.8469	49.8469									2	2	40	6.04893	4.79988	0.833376	0.648227	10.7164	10.7164									2	8	47	5.4412	4.48765	0.872185	4.38263	80.5453	19.4547
	1	1	11	9.70785	7.998	0.847261	4.84066	49.8634	49.8634									2	16	3	12.2117	10.8434	0.925172	1.30887	10.7182	10.7182									2	6	27	7.83774	6.84159	0.91814	6.29851	80.3613	19.6387
	1	12	457	9.93572	8.2111	0.87953	4.95445	49.865	49.865									2	13	351	5.55906	4.5339	0.865722	4.96079	89.238	10.762									2	10	218	6.75895	5.56797	0.843496	1.32855	19.6562	19.6562
	1	15	27	7.69946	6.58449	0.898979	3.85961	50.1283	49.8717									2	10	7	31.6907	28.7406	0.915811	3.44428	10.8684	10.8684									2	7	98	7.83547	6.66383	0.890087	6.28869	80.2592	19.7408
	1	11	526	7.23563	6.02709	0.903152	3.60929	49.8821	49.8821									2	4	57	5.05286	4.17196	0.869387	4.4968	88.9952	11.0048									2	9	35	8.67404	7.32264	0.891954	6.9522	80.1495	19.8505
	1	1	495	8.25928	6.88652	0.861298	4.12037	49.8878	49.8878									2	9	72	14.5252	12.7173	0.896864	12.9214	88.9583	11.0417									2	14	228	4.76892	4.00281	0.906913	0.947263	19.8633	19.8633
	1	1	204	7.88381	6.5715	0.864339	3.95002	50.1029	49.8971									2	10	424	5.49548	4.75058	0.927157	4.88164	88.8302	11.1698									2	15	235	5.66018	4.59995	0.845077	1.12699	19.9108	19.9108
	1	10	10	5.93955	5.14643	0.928097	2.96376	49.8987	49.8987									2	2	435	14.963	12.4498	0.85656	1.68594	11.2674	11.2674									2	4	34	6.82939	5.27424	0.810584	5.46928	80.0844	19.9156
	1	3	21	7.74486	6.51418	0.901379	3.8659	49.9158	49.9158									2	10	12	3.75083	2.98482	0.868636	0.423461	11.2898	11.2898									2	2	55	6.38918	5.22904	0.878388	1.28015	20.0363	20.0363
	1	2	20	7.2272	6.26013	0.920529	3.60755	49.9162	49.9162									2	11	108	6.80643	5.84291	0.915951	6.01166	88.3233	11.6767									2	10	3	8.65252	7.2967	0.883117	6.89527	79.6909	20.3091
	1	3	46	7.42353	6.13276	0.847068	3.71784	50.0819	49.9181									2	13	415	8.48716	7.32129	0.895413	1.00645	11.8585	11.8585									2	10	214	4.90547	4.10789	0.891899	1.00372	20.4613	20.4613
	1	9	11	9.17475	8.23884	0.942651	4.58133	49.9341	49.9341									2	17	37	5.80489	4.97564	0.918098	0.690927	11.9025	11.9025									2	5	16	4.56178	3.84513	0.92722	0.936617	20.5318	20.5318
	1	15	22	16.0192	14.0324	0.879604	8.00038	49.9425	49.9425									2	15	8	9.93679	8.60536	0.905402	8.73709	87.9267	12.0733									2	8	30	9.45954	7.86017	0.863673	7.50258	79.3124	20.6876
	1	4	432	9.11776	7.59243	0.849571	4.55371	49.9433	49.9433									2	4	67	4.66826	3.91885	0.898562	4.1031	87.8937	12.1063									2	13	25	7.0523	6.09007	0.929064	1.46114	20.7186	20.7186
	1	1	270	7.84074	6.46597	0.842884	3.92471	50.0553	49.9447									2	9	36	6.88239	5.68398	0.856474	6.04876	87.8875	12.1125									2	9	204	6.93024	5.70011	0.879401	5.48961	79.2124	20.7876
	1	1	42	8.41587	6.98386	0.859422	4.21197	50.048	49.952									2	9	23	4.37118	3.45936	0.841567	0.546098	12.4931	12.4931									2	4	66	6.76385	5.78505	0.91927	1.41508	20.9212	20.9212
	1	6	41	9.12403	7.64958	0.862747	4.55847	49.9612	49.9612									2	19	412	6.49074	5.24673	0.843864	0.814148	12.5432	12.5432									2	7	51	6.95976	5.90521	0.892652	5.50267	79.0641	20.9359
	1	11	4	8.6723	7.29907	0.889882	4.33295	49.9631	49.9631									2	1	32	5.06039	4.15213	0.881261	4.41066	87.1604	12.8396									2	15	62	8.72736	7.82982	0.931124	1.82723	20.9369	20.9369
	1	1	2	8.57403	7.20609	0.86803	4.28602	49.9884	49.9884									2	10	1	4.97015	4.29952	0.925014	4.32994	87.1189	12.8811									2	2	41	5.02994	4.236	0.906967	3.97328	78.9927	21.0073
	1	12	459	8.26378	6.95848	0.892995	4.13126	49.9924	49.9924									2	3	5	5.532	4.68472	0.908508	4.8115	86.9758	13.0242									2	7	38	7.30494	6.06833	0.877665	1.53567	21.0223	21.0223
	2	3	12	6.92137	5.93412	0.895215		0	0									2	12	1	4.42843	3.83214	0.923076	3.84791	86.8911	13.1089									2	12	18	6.45259	5.45947	0.907513	1.35881	21.0583	21.0583
	2	3	42	10.3138	9.18956	0.928498		0	0									2	1	426	5.91991	4.77456	0.848339	0.785409	13.2673	13.2673									2	4	27	4.5397	3.58598	0.831433	0.956695	21.074	21.074
	2	4	4	5.90765	5.0062	0.899072		0	0									2	3	21	8.98249	7.68228	0.884238	7.78972	86.7211	13.2789									2	12	223	7.16664	6.07234	0.903763	5.65524	78.9106	21.0894
	2	4	5	6.02373	5.07288	0.890657		0	0									2	9	13	12.3246	10.1494	0.843763	10.6817	86.6696	13.3304									2	15	4	5.47985	4.62754	0.897933	4.31053	78.6615	21.3385
	2	4	13	5.29105	4.50033	0.896513		0	0									2	11	458	5.28329	4.31782	0.853786	4.57449	86.5841	13.4159									2	11	2	4.71068	3.98044	0.913937	3.68759	78.2814	21.7186
	2	4	118	7.60906	6.30219	0.866644		0	0									2	9	11	6.13257	5.00725	0.861704	5.3006	86.4336	13.5664									2	3	63	5.04047	4.2312	0.900984	1.09992	21.8217	21.8217
	2	4	176	9.08275	7.64981	0.869421		0	0									2	9	25	4.78171	3.85146	0.866145	4.12534	86.2733	13.7267									2	15	75	4.91247	4.12626	0.904917	3.83728	78.1131	21.8869
	2	4	202	5.94252	5.06391	0.901038		0	0									2	17	11	4.72166	4.05114	0.927545	0.652641	13.8223	13.8223									2	15	47	6.28502	5.42381	0.915393	1.38475	22.0325	22.0325
	2	4	332	5.18823	4.19928	0.845179		0	0									2	10	30	4.42478	3.66556	0.884681	0.613855	13.8731	13.8731									2	13	32	6.26958	5.29273	0.914441	4.88429	77.9045	22.0955
	2	5	11	6.48109	5.57176	0.923565		0	0									2	11	23	5.55464	4.30639	0.838108	4.78347	86.1167	13.8833									2	10	42	5.04579	4.15878	0.864783	1.12969	22.3887	22.3887
	2	6	15	6.87775	5.98296	0.918765		0	0									2	5	80	11.6541	9.68905	0.856913	10.0356	86.1119	13.8881									2	13	7	7.03088	5.71271	0.819406	1.57482	22.3987	22.3987
	2	6	92	7.95842	6.72907	0.885985		0	0									2	1	130	5.60679	4.56534	0.852029	4.81104	85.8074	14.1926									2	9	1	7.67966	6.55512	0.901495	1.73182	22.5508	22.5508
	2	6	104	5.97261	4.88667	0.838971		0	0									2	19	32	5.03991	4.38282	0.929362	4.32279	85.7712	14.2288									2	13	36	6.16387	5.10767	0.888577	1.39816	22.6831	22.6831
	2	6	277	6.14473	5.09027	0.881114		0	0									2	5	15	5.3327	4.4785	0.890571	0.77184	14.4737	14.4737									2	2	159	7.24341	6.05672	0.867965	1.6445	22.7034	22.7034
	2	7	8	7.25472	6.05861	0.879969		0	0									2	19	402	4.39166	3.54591	0.874574	3.75472	85.4968	14.5032									2	6	183	10.9646	9.13555	0.854562	8.45999	77.1575	22.8425
	2	7	11	7.05102	5.83858	0.865455		0	0									2	18	11	6.20447	5.16856	0.88488	0.900001	14.5057	14.5057									2	13	34	2.57486	2.0864	0.926132	0.59471	23.0967	23.0967
	2	8	22	9.08733	7.71378	0.884753		0	0									2	1	296	7.32317	6.04812	0.866252	6.2554	85.4194	14.5806									2	8	13	6.12337	4.95101	0.847431	4.70763	76.8797	23.1203
	2	8	25	5.82226	4.83633	0.881516		0	0									2	18	468	7.43334	6.02787	0.829455	6.34901	85.4126	14.5874									2	15	263	16.1518	14.1801	0.906236	12.393	76.7283	23.2717
	2	9	18	5.32692	4.46043	0.896599		0	0									2	13	78	6.66926	5.70198	0.910293	5.68974	85.3129	14.6871									2	13	226	7.79545	6.69237	0.922179	5.96372	76.5026	23.4974
	2	10	22	6.28011	5.1637	0.863359		0	0									2	15	262	12.355	10.0722	0.834264	1.81792	14.7141	14.7141									2	12	17	5.34214	4.54998	0.905138	4.08217	76.4145	23.5855
	2	10	292	4.57728	3.71586	0.886155		0	0									2	5	328	5.02404	4.11285	0.872207	4.28453	85.2805	14.7195									2	2	38	6.21039	5.2391	0.887442	4.72395	76.0654	23.9346
	2	11	6	5.16861	4.25397	0.885112		0	0									2	12	5	4.47371	3.82648	0.939257	3.81513	85.279	14.721									2	9	44	5.65592	4.78822	0.905013	1.35754	24.0021	24.0021
	2	11	303	6.18182	4.85615	0.810174		0	0									2	2	433	6.26376	5.00574	0.833641	5.34107	85.2694	14.7306									2	3	35	6.75519	5.60256	0.86539	1.62266	24.0209	24.0209
	2	12	6	6.45438	5.37188	0.889443		0	0									2	2	29	9.55635	7.95397	0.867716	8.14171	85.1969	14.8031									2	13	12	5.9198	5.04222	0.913123	4.49376	75.9107	24.0893
	2	12	23	6.65326	5.81243	0.926755		0	0									2	1	43	5.94506	4.84272	0.858053	5.05258	84.9878	15.0122									2	7	94	7.13208	5.89025	0.885096	1.71874	24.0987	24.0987
	2	13	8	8.40022	7.17022	0.896405		0	0									2	4	71	5.39046	4.35086	0.839228	0.816917	15.1549	15.1549									2	4	80	6.2021	5.23926	0.887515	1.50317	24.2364	24.2364
	2	14	12	5.67406	4.77905	0.912744		0	0									2	4	43	8.73059	7.55073	0.913436	1.32857	15.2174	15.2174									2	11	5	6.28876	5.3446	0.896746	1.52837	24.3032	24.3032
	2	14	14	5.81622	4.65472	0.861999		0	0									2	13	356	5.51527	4.41053	0.830414	4.66989	84.672	15.328									2	10	15	7.187	6.0233	0.87521	1.74978	24.3464	24.3464
	2	14	20	6.4041	5.34747	0.878348		0	0									2	11	66	15.7873	13.5835	0.890353	2.426	15.3668	15.3668									2	4	15	5.5561	4.7465	0.906578	4.20068	75.6048	24.3952
	2	15	322	7.11714	5.94493	0.886545		0	0									2	5	325	6.47177	5.27428	0.853827	5.47429	84.5873	15.4127									2	8	48	4.33154	3.58843	0.881221	1.06503	24.5878	24.5878
	2	8	284	10.2666	8.64465	0.861079	1.11663	10.8764	10.8764									2	16	12	6.15232	5.44743	0.950962	5.19882	84.5017	15.4983									2	15	236	8.82136	7.37129	0.857874	2.18572	24.7775	24.7775
	2	4	98	5.02894	4.18681	0.888679	4.34378	86.3756	13.6244									2	6	6	4.22603	2.99861	0.792017	3.5665	84.3936	15.6064									2	7	1	5.02184	4.24414	0.901232	3.77002	75.0725	24.9275
	2	9	8	5.54074	4.87028	0.956624	4.68254	84.511	15.489									2	4	70	5.23888	4.39387	0.890616	4.41651	84.3025	15.6975									2	15	21	6.03824	4.76666	0.834556	4.5324	75.0615	24.9385
	2	11	9	7.95194	6.85741	0.90359	6.65995	83.7526	16.2474									2	11	423	8.7407	7.07172	0.841803	1.37677	15.7512	15.7512									2	1	9	4.53411	3.77788	0.897392	3.39943	74.9746	25.0254
	2	2	10	5.61698	4.88777	0.941375	1.01665	18.0996	18.0996									2	17	7	6.1131	5.19636	0.892805	0.965394	15.7922	15.7922									2	15	1	5.85329	4.95127	0.901278	1.46532	25.0341	25.0341
	2	12	1	5.74799	4.98496	0.931753	4.63367	80.6138	19.3862									2	18	30	6.71241	5.53641	0.862972	5.6466	84.1217	15.8783									2	9	48	5.71739	4.64936	0.846744	1.43251	25.0553	25.0553
	2	12	22	6.26065	5.4094	0.926623	4.92651	78.6902	21.3098									2	4	91	5.89095	4.93621	0.898642	0.938287	15.9276	15.9276									2	2	58	4.44348	3.51708	0.86272	1.11566	25.1077	25.1077
	2	10	24	5.83572	4.93324	0.911775	1.25114	21.4394	21.4394									2	9	339	6.21337	5.20435	0.894633	5.21725	83.9682	16.0318									2	2	17	5.76716	4.89644	0.919775	1.45019	25.1456	25.1456
	2	4	91	4.62973	3.57726	0.835939	0.99839	21.5647	21.5647									2	9	31	4.5291	3.77179	0.906825	0.743232	16.4101	16.4101									2	2	87	6.47318	5.3301	0.869596	4.83771	74.7347	25.2653
	2	5	2	4.87671	4.19404	0.91152	1.0645	21.8282	21.8282									2	15	87	4.22914	3.47583	0.889186	0.702116	16.6019	16.6019									2	4	91	4.00392	3.31167	0.904093	2.99221	74.732	25.268
	2	5	15	6.62537	5.78545	0.930054	5.0996	76.9708	23.0292									2	8	13	6.33127	5.68184	0.959567	5.26482	83.1559	16.8441									2	9	56	6.20649	5.18551	0.874862	1.57556	25.3857	25.3857
	2	10	297	6.37001	5.33818	0.88818	1.48848	23.367	23.367									2	15	76	7.23293	5.80312	0.833017	6.01027	83.096	16.904									2	8	26	6.62143	5.28362	0.835359	4.93917	74.5937	25.4063
	2	4	79	5.25805	4.24211	0.864052	4.01597	76.3775	23.6225									2	15	57	13.0354	11.2845	0.906269	2.21989	17.0296	17.0296									2	4	46	7.42912	6.22735	0.891886	1.89873	25.5579	25.5579
	2	4	329	5.4504	4.37624	0.843121	4.13235	75.8173	24.1827									2	17	23	8.16789	7.33116	0.941816	1.39335	17.0588	17.0588									2	2	29	6.74503	5.6917	0.893399	5.01508	74.3522	25.6478
	2	4	127	5.97536	4.85651	0.864844	4.51236	75.5162	24.4838									2	19	116	7.45271	6.06508	0.834476	6.18081	82.9337	17.0663									2	9	143	8.22271	7.0339	0.904807	2.11177	25.6821	25.6821
	2	2	7	10.0224	8.27594	0.822926	2.47558	24.7003	24.7003									2	12	14	6.55503	5.65206	0.926337	1.12229	17.121	17.121									2	8	96	7.51012	6.03141	0.839316	1.92909	25.6865	25.6865
	2	4	139	5.71097	4.52603	0.836871	4.26289	74.6439	25.3561									2	1	84	7.7376	6.40129	0.857042	1.32815	17.1649	17.1649									2	3	29	5.14376	4.20126	0.866223	1.32151	25.6914	25.6914
	2	4	330	9.52598	8.11034	0.892712	7.04392	73.9443	26.0557									2	10	24	6.22566	4.95666	0.843487	5.1545	82.7944	17.2056									2	6	182	13.7313	11.6903	0.85267	10.1848	74.172	25.828
	2	10	293	5.74236	4.76993	0.885802	4.18303	72.8451	27.1549									2	14	11	8.04393	6.87486	0.893475	6.65257	82.703	17.297									2	2	33	4.5384	3.83297	0.904877	1.17606	25.9135	25.9135
	2	9	255	5.31397	4.28038	0.875109	3.81369	71.7672	28.2328									2	9	42	4.81193	3.84551	0.865312	3.97521	82.6116	17.3884									2	6	57	6.71323	5.75071	0.913305	1.74371	25.9742	25.9742
	2	4	335	6.13611	4.94294	0.845714	1.76089	28.6972	28.6972									2	15	33	4.64532	3.65771	0.832623	3.83476	82.551	17.449									2	7	247	6.52195	5.32855	0.845114	1.71091	26.233	26.233
	2	4	126	5.8409	4.79317	0.878819	4.14931	71.0389	28.9611									2	16	372	5.53503	4.79878	0.946608	0.97051	17.534	17.534									2	2	21	5.28421	4.40179	0.886911	3.89731	73.7539	26.2461
	2	14	2	5.43349	4.77078	0.951037	3.8196	70.2974	29.7026									2	11	41	5.44525	4.20701	0.817856	4.48824	82.4248	17.5752									2	9	39	6.4153	4.95634	0.804248	4.72711	73.685	26.315
	2	3	327	4.53866	3.73412	0.863331	3.19044	70.2949	29.7051									2	10	5	6.74992	5.62938	0.878395	5.5619	82.3995	17.6005									2	3	74	7.779	6.48279	0.86893	5.73112	73.6743	26.3257
	2	8	9	6.19343	5.19288	0.876471	4.26455	68.8561	31.1439									2	18	385	3.63083	2.99868	0.905368	2.98838	82.3057	17.6943									2	9	26	7.72535	6.29272	0.850477	2.04019	26.4091	26.4091
	2	6	96	10.1284	8.79362	0.901761	6.80377	67.1749	32.8251									2	9	341	5.06677	4.03131	0.860304	0.901397	17.7904	17.7904									2	5	11	4.83102	4.05228	0.92964	1.28643	26.6285	26.6285
	2	10	294	6.52489	5.66608	0.92505	2.22294	34.0685	34.0685									2	15	82	8.5211	6.89773	0.843404	6.99538	82.0948	17.9052									2	4	18	7.22593	6.17222	0.908405	5.30125	73.3642	26.6358
	2	15	323	5.56314	4.71117	0.918849	3.65927	65.7772	34.2228									2	15	5	6.743	5.70094	0.896568	1.21183	17.9716	17.9716									2	10	51	6.1483	5.12794	0.878989	4.50427	73.2604	26.7396
	2	9	287	5.93219	4.99223	0.90451	3.89783	65.7064	34.2936									2	16	2	4.25077	3.5942	0.90775	0.764368	17.9819	17.9819									2	9	28	6.68924	5.68411	0.886194	1.80865	27.0382	27.0382
	2	13	314	6.41851	5.49172	0.905695	2.21733	34.5458	34.5458									2	5	316	7.71171	6.49538	0.86898	6.31372	81.8719	18.1281									2	2	62	5.75319	4.92145	0.930638	4.19232	72.8695	27.1305
	2	10	15	6.33122	5.04537	0.80633	4.10101	64.7744	35.2256									2	19	92	9.93711	8.21958	0.844341	8.13014	81.8159	18.1841									2	6	23	8.49895	7.12789	0.8863	2.31172	27.2	27.2
	2	4	143	5.38217	4.36305	0.854841	3.47383	64.5433	35.4567									2	13	417	8.08669	6.77408	0.874081	1.4787	18.2856	18.2856									2	3	25	6.50563	5.3329	0.85983	1.78252	27.3997	27.3997
	2	14	13	6.80831	5.49197	0.853805	2.45691	36.0869	36.0869									2	9	68	5.87071	4.86063	0.884994	1.07584	18.3256	18.3256									2	15	70	6.3565	5.22383	0.867936	4.60848	72.5002	27.4998
	2	6	43	6.89897	5.49647	0.830012	4.39588	63.7179	36.2821									2	14	6	4.92238	3.99259	0.87731	0.902803	18.3408	18.3408									2	6	59	5.24443	4.42333	0.897012	1.4426	27.5073	27.5073
	2	10	351	6.8738	5.94313	0.919032	4.35277	63.324	36.676									2	2	304	8.35574	6.96741	0.880065	1.54531	18.494	18.494									2	4	37	6.78119	5.88292	0.933053	1.86675	27.5284	27.5284
	2	4	333	5.61434	4.52137	0.859994	2.06813	36.8366	36.8366									2	11	96	3.97685	3.20747	0.866019	3.23559	81.3605	18.6395									2	9	17	6.91277	5.75096	0.890245	4.99862	72.3099	27.6901
	2	15	3	6.53475	5.53425	0.912507	4.10498	62.8178	37.1822									2	13	45	9.97027	8.33743	0.861336	8.10702	81.3119	18.6881									2	15	61	9.46396	8.08045	0.904112	6.84168	72.2919	27.7081
	2	4	38	6.22452	4.88508	0.821093	3.90919	62.8031	37.1969									2	3	437	5.24549	4.20935	0.86035	0.98777	18.8309	18.8309									2	12	9	9.08875	7.80289	0.906735	6.55539	72.1264	27.8736
	2	12	12	5.9385	5.04802	0.896785	2.23081	37.5653	37.5653									2	17	2	4.21808	3.46068	0.89704	3.42017	81.0835	18.9165									2	15	27	6.21523	5.24488	0.881739	1.73533	27.9205	27.9205
	2	4	39	5.66933	4.48123	0.838012	3.53118	62.2856	37.7144									2	7	4	6.05929	5.03524	0.860699	4.91187	81.0636	18.9364									2	6	16	12.6534	11.1449	0.912472	9.12018	72.0767	27.9233
	2	8	15	5.87956	4.77947	0.857859	3.64867	62.0569	37.9431									2	11	1	4.51944	3.64058	0.873584	0.857705	18.9781	18.9781									2	3	8	6.22332	5.18352	0.876117	4.48378	72.0479	27.9521
	2	3	41	7.07553	6.17751	0.930801	4.32165	61.0787	38.9213									2	1	286	7.45917	5.927	0.826156	6.03358	80.8882	19.1118									2	4	65	6.4218	5.49844	0.910346	4.6228	71.9861	28.0139
	2	11	15	10.9818	9.60058	0.899385	6.70398	61.0461	38.9539									2	11	36	4.7931	3.80632	0.841113	0.923298	19.2631	19.2631									2	2	83	6.13631	5.2438	0.913649	4.41066	71.8781	28.1219
	2	2	8	4.93261	3.98451	0.896698	1.9264	39.0544	39.0544									2	8	1	8.08459	6.99037	0.920764	6.52458	80.7039	19.2961									2	8	57	5.65788	4.73045	0.910112	1.59717	28.2292	28.2292
	2	14	359	6.71407	5.81288	0.925346	2.65758	39.5822	39.5822									2	16	370	6.0687	5.29528	0.946415	1.17193	19.3111	19.3111									2	4	76	5.9346	4.78996	0.839176	4.25843	71.7561	28.2439
	2	6	19	6.05511	5.11299	0.894303	2.3983	39.6079	39.6079									2	18	384	5.37379	4.36043	0.858459	1.0422	19.3941	19.3941									2	13	47	6.42303	5.26984	0.86611	1.81415	28.2444	28.2444
	2	1	4	10.2492	8.56207	0.879109	6.15966	60.0989	39.9011									2	7	441	6.86191	5.84192	0.894188	5.5288	80.5724	19.4276									2	3	71	10.1181	8.69734	0.897517	7.24963	71.6499	28.3501
	2	3	33	6.2524	5.2787	0.899845	3.75054	59.9856	40.0144									2	15	60	9.2165	7.9774	0.910933	1.79839	19.5128	19.5128									2	7	188	6.90842	5.84193	0.895457	1.98307	28.7051	28.7051
	2	12	15	6.57787	5.47675	0.888978	3.92501	59.67	40.33									2	9	84	5.94207	4.95778	0.879939	4.78113	80.4624	19.5376									2	5	1	5.42356	4.61786	0.914998	3.86187	71.2054	28.7946
	2	6	49	9.63008	7.81092	0.83867	5.74097	59.6149	40.3851									2	17	28	4.92108	4.18249	0.93419	3.95238	80.3153	19.6847									2	15	69	6.30252	5.38752	0.902734	4.47787	71.0489	28.9511
	2	6	24	6.64133	5.76724	0.918297	3.9375	59.2878	40.7122									2	15	364	6.05693	4.83344	0.82463	4.85651	80.1811	19.8189									2	4	94	7.0441	6.07826	0.912993	2.06732	29.3483	29.3483
	2	6	31	6.92681	5.33763	0.81881	4.0992	59.1788	40.8212									2	9	35	6.45994	5.61424	0.923001	1.29365	20.0257	20.0257									2	15	31	9.95553	8.16886	0.848926	7.00034	70.3161	29.6839
	2	1	5	6.29976	5.43942	0.924291	3.72077	59.0622	40.9378									2	13	352	5.40602	4.54799	0.895242	1.08307	20.0345	20.0345									2	8	79	8.02619	6.85047	0.889258	2.39522	29.8426	29.8426
	2	10	14	5.06652	4.0964	0.891319	2.98	58.8174	41.1826									2	13	31	8.23373	6.54536	0.822982	6.57131	79.8097	20.1903									2	5	23	5.95128	5.10569	0.911189	1.7767	29.854	29.854
	2	4	197	8.60393	7.10524	0.850484	5.05259	58.7243	41.2757									2	17	33	3.91049	3.31379	0.93665	0.79622	20.3611	20.3611									2	14	16	7.04323	5.74949	0.839808	4.94031	70.1427	29.8573
	2	6	95	6.74172	5.66376	0.889923	3.95139	58.6111	41.3889									2	9	445	6.07861	5.02648	0.879394	4.83261	79.5018	20.4982									2	1	15	6.02232	5.17193	0.913104	1.80666	29.9994	29.9994
	2	8	282	6.85158	5.54669	0.863619	2.84296	41.4935	41.4935									2	9	66	8.43698	7.369	0.920014	6.7046	79.4668	20.5332									2	14	261	3.83118	3.05414	0.845069	2.68039	69.9624	30.0376
	2	4	117	6.36435	5.29811	0.880734	3.71986	58.4483	41.5517									2	2	73	5.43906	4.39543	0.850742	4.31367	79.3091	20.6909									2	9	6	5.36609	4.58931	0.909315	1.61638	30.122	30.122
	2	3	39	6.12698	5.23222	0.91341	3.5744	58.3388	41.6612									2	7	22	7.02632	5.69591	0.870354	1.45789	20.749	20.749									2	6	42	8.02012	6.97823	0.91093	5.59472	69.7586	30.2414
	2	6	2	6.10679	5.08997	0.879571	2.56829	42.0563	42.0563									2	4	84	5.44709	4.64046	0.905329	1.13763	20.8851	20.8851									2	12	28	6.04302	5.09781	0.9005	4.2144	69.7399	30.2601
	2	11	4	10.3337	8.80787	0.878877	4.35238	42.1182	42.1182									2	14	36	5.56617	4.69883	0.910465	4.40362	79.1139	20.8861									2	7	34	5.09954	4.37964	0.913774	3.54447	69.5057	30.4943
	2	4	336	9.07755	7.42782	0.834746	3.83063	42.199	42.199									2	19	273	8.00546	6.35103	0.82029	1.67274	20.8949	20.8949									2	15	37	6.33084	5.22335	0.857603	4.39606	69.4388	30.5612
	2	3	268	9.51082	8.05134	0.883173	5.49659	57.793	42.207									2	7	16	10.8649	9.49083	0.90654	2.28786	21.0573	21.0573									2	11	8	6.91566	5.99767	0.916953	4.79881	69.3904	30.6096
	2	4	122	5.24478	4.19514	0.853377	3.02793	57.7322	42.2678									2	17	35	5.42838	4.59052	0.923395	4.28057	78.8554	21.1446									2	10	45	5.88595	4.87943	0.864197	1.80239	30.6219	30.6219
	2	10	299	7.4472	5.82144	0.802765	4.29793	57.712	42.288									2	11	76	5.74879	4.88548	0.909294	4.5294	78.7888	21.2112									2	6	184	8.3198	6.99271	0.883018	5.76182	69.2543	30.7457
	2	6	93	5.36639	4.37036	0.842137	3.09524	57.6782	42.3218									2	3	17	8.36497	7.19534	0.882048	6.57964	78.6571	21.3429									2	8	114	8.82927	7.59749	0.89139	2.71848	30.7894	30.7894
	2	10	29	9.33297	7.59639	0.827517	3.97099	42.548	42.548									2	13	40	3.67815	2.86371	0.838899	0.786132	21.373	21.373									2	2	51	10.1975	8.82339	0.91051	7.03881	69.0251	30.9749
	2	6	16	7.43765	6.28694	0.884725	3.16631	42.5713	42.5713									2	4	25	7.43221	5.98157	0.8375	5.84173	78.6002	21.3998									2	2	66	7.70693	6.28884	0.846543	2.39244	31.0427	31.0427
	2	8	344	7.85467	6.29979	0.846862	3.34578	42.596	42.596									2	9	451	19.2645	15.9709	0.844595	4.16198	21.6044	21.6044									2	9	73	7.32946	6.33632	0.907572	5.04008	68.7647	31.2353
	2	2	5	8.21072	6.66984	0.853312	4.70129	57.258	42.742									2	12	8	12.4047	10.4715	0.834161	9.72206	78.3741	21.6259									2	6	35	5.90148	4.87446	0.896889	1.84666	31.2915	31.2915
	2	4	108	9.79708	8.28924	0.863414	5.5955	57.114	42.886									2	5	317	6.6801	5.41766	0.844289	1.44487	21.6295	21.6295									2	15	64	7.67948	6.54379	0.902468	5.27056	68.6318	31.3682
	2	6	105	5.86912	5.03073	0.91223	2.51868	42.9141	42.9141									2	1	121	4.5743	3.7647	0.888514	0.990659	21.6571	21.6571									2	2	54	6.40328	5.49363	0.920116	2.01015	31.3925	31.3925
	2	14	15	6.82916	5.73659	0.886368	3.89624	57.053	42.947									2	9	444	6.00404	4.89897	0.890126	1.30318	21.7051	21.7051									2	14	6	6.87114	5.8762	0.908429	4.71252	68.5843	31.4157
	2	12	10	8.65685	7.03463	0.865363	4.93156	56.9671	43.0329									2	3	18	7.93753	6.85839	0.886418	1.72303	21.7074	21.7074									2	8	85	8.01637	7.06086	0.920955	2.52001	31.4358	31.4358
	2	3	267	6.80792	5.78685	0.879126	3.86918	56.8335	43.1665									2	9	78	5.10927	4.26995	0.898895	1.11092	21.7433	21.7433									2	7	90	6.00514	4.78947	0.828923	1.88865	31.4506	31.4506
	2	4	183	7.37167	5.92599	0.834811	4.18495	56.7707	43.2293									2	13	12	5.1109	4.10645	0.838675	1.11723	21.8597	21.8597									2	3	69	6.88511	5.49186	0.835786	2.17265	31.5558	31.5558
	2	8	19	8.76008	7.56801	0.911068	3.78816	43.2434	43.2434									2	15	463	14.1246	12.1393	0.876842	3.09963	21.9449	21.9449									2	9	12	10.3634	8.96562	0.890192	7.09188	68.4322	31.5678
	2	7	7	9.82367	8.59275	0.902893	5.57489	56.7496	43.2504									2	18	49	8.15421	6.64188	0.852683	6.36277	78.0305	21.9695									2	9	41	6.79133	5.54579	0.870816	2.1462	31.602	31.602
	2	6	100	5.78584	4.89199	0.911379	2.50396	43.2773	43.2773									2	1	285	6.83097	5.61982	0.868327	1.50287	22.0008	22.0008									2	13	11	4.5421	3.75114	0.908445	3.10117	68.2763	31.7237
	2	5	4	6.84226	5.90706	0.921754	3.881	56.721	43.279									2	19	100	5.71332	4.49323	0.830858	1.25722	22.005	22.005									2	10	41	4.73513	4.00432	0.916354	3.22677	68.1453	31.8547
	2	3	325	6.28742	5.12482	0.852018	3.56504	56.7012	43.2988									2	1	124	6.44683	5.43362	0.886871	5.01743	77.8278	22.1722									2	9	24	5.41355	4.15828	0.820801	1.72515	31.8673	31.8673
	2	6	340	6.00811	4.89339	0.84502	3.40591	56.6886	43.3114									2	9	77	5.33235	4.51697	0.903938	4.14872	77.8028	22.1972									2	11	221	6.37188	5.42451	0.914079	2.0315	31.8822	31.8822
	2	4	33	7.1267	6.10012	0.906906	4.03897	56.6738	43.3262									2	13	361	4.79005	3.77601	0.832985	3.72023	77.6658	22.3342									2	7	91	6.16086	4.91944	0.846504	1.96945	31.9672	31.9672
	2	4	112	8.95224	7.43363	0.851508	3.88446	43.3909	43.3909									2	14	12	3.98763	3.02483	0.815416	0.890924	22.3422	22.3422									2	9	60	6.0902	4.96723	0.865463	1.95471	32.096	32.096
	2	6	20	8.56403	7.06756	0.84098	3.71963	43.4332	43.4332									2	5	36	5.02087	4.22194	0.907045	1.12818	22.4699	22.4699									2	2	164	8.81158	7.45009	0.88449	5.97241	67.7791	32.2209
	2	14	10	8.08798	6.61223	0.862392	4.57165	56.5239	43.4761									2	9	9	12.5361	10.8501	0.903763	9.69727	77.3544	22.6456									2	9	3	7.23284	6.10024	0.886434	4.89643	67.6972	32.3028
	2	4	2	6.98096	5.95419	0.905782	3.9413	56.4578	43.5422									2	18	7	4.94469	4.0354	0.870495	3.81753	77.2047	22.7953									2	1	21	5.86793	4.96581	0.909518	1.90653	32.4907	32.4907
	2	3	29	7.68338	6.25151	0.855107	4.33675	56.4433	43.5567									2	12	4	4.5249	3.74653	0.880348	3.47839	76.8721	23.1279									2	13	39	8.43104	7.19354	0.878296	2.74512	32.5597	32.5597
	2	4	328	8.06605	6.9205	0.903507	4.55145	56.4272	43.5728									2	18	1	9.27884	7.75131	0.85449	7.13084	76.8506	23.1494									2	7	56	5.66883	4.84718	0.904018	3.81516	67.3006	32.6994
	2	8	11	9.54756	8.09416	0.904994	5.38716	56.4245	43.5755									2	7	2	7.04716	5.91448	0.896184	5.41071	76.7786	23.2214									2	15	66	6.08966	5.22833	0.916285	4.09793	67.2933	32.7067
	2	10	23	5.81359	4.67572	0.840858	3.2794	56.4092	43.5908									2	18	9	5.63029	4.56079	0.855128	4.32268	76.7756	23.2244									2	12	26	5.83858	5.05389	0.932349	1.91212	32.7497	32.7497
	2	10	17	6.92789	5.92944	0.91062	3.03452	43.8015	43.8015									2	17	34	6.97276	6.02771	0.920984	5.34739	76.6896	23.3104									2	7	193	10.7657	9.06172	0.875278	3.52613	32.7533	32.7533
	2	8	347	6.07443	5.0796	0.888283	2.66923	43.9421	43.9421									2	18	392	5.3693	4.4107	0.862528	1.25634	23.3986	23.3986									2	14	4	5.65263	4.91417	0.924445	1.85616	32.8372	32.8372
	2	12	306	7.63372	6.53285	0.913156	3.35936	44.0068	44.0068									2	13	418	8.85742	7.38219	0.868588	6.78057	76.5525	23.4475									2	2	161	6.04276	4.80577	0.851522	4.05546	67.1127	32.8873
	2	4	69	7.54693	5.95654	0.821106	3.32122	44.0076	44.0076									2	15	366	5.90794	4.72731	0.82727	4.52174	76.5366	23.4634									2	6	26	6.03454	5.32889	0.949524	4.04342	67.0047	32.9953
	2	10	21	9.58433	7.88975	0.855846	5.35984	55.923	44.077									2	9	452	11.4806	9.51528	0.860959	8.7614	76.3151	23.6849									2	13	43	9.35671	8.04434	0.894197	6.26673	66.9757	33.0243
	2	11	355	7.31682	6.23818	0.902791	4.09092	55.9112	44.0888									2	2	12	5.55018	4.61349	0.887676	4.2309	76.23	23.77									2	3	13	4.65502	3.81109	0.889935	3.10909	66.7899	33.2101
	2	10	352	6.54183	5.51013	0.90029	3.65714	55.9039	44.0961									2	5	323	5.97022	4.86065	0.838019	1.42326	23.8393	23.8393									2	2	52	5.23238	4.17959	0.843091	1.73791	33.2145	33.2145
	2	10	16	8.03292	6.56602	0.859815	3.54269	44.1022	44.1022									2	1	89	7.03451	6.00184	0.891863	5.34368	75.9638	24.0362									2	2	6	6.00225	5.04443	0.919979	4.0045	66.7166	33.2834
	2	14	318	7.24571	5.9049	0.853966	4.03734	55.7204	44.2796									2	14	16	4.79764	3.79961	0.834592	3.63647	75.797	24.203									2	2	76	6.31245	5.34457	0.882922	4.20989	66.6918	33.3082
	2	9	2	7.10078	6.22488	0.923815	3.14448	44.2836	44.2836									2	9	87	7.03515	6.10372	0.930053	1.70437	24.2264	24.2264									2	3	46	7.5196	6.07475	0.839979	5.00845	66.6053	33.3947
	2	4	271	7.62133	6.32736	0.891874	3.38302	44.3888	44.3888									2	5	21	4.98324	4.08794	0.874558	1.21763	24.4345	24.4345									2	4	58	6.67095	5.45145	0.856931	2.2301	33.4301	33.4301
	2	4	148	10.8172	9.20243	0.877234	4.81355	44.4992	44.4992									2	13	46	4.69837	3.88573	0.900934	1.14935	24.4627	24.4627									2	4	242	8.54757	7.30543	0.902138	5.68453	66.5046	33.4954
	2	15	321	12.5929	10.4222	0.849382	6.98881	55.4978	44.5022									2	1	48	9.33106	7.75593	0.850003	2.28281	24.4646	24.4646									2	2	23	5.98348	4.64836	0.818265	2.00684	33.5396	33.5396
	2	5	273	7.69658	6.33128	0.885495	4.26649	55.4336	44.5664									2	1	24	6.5859	5.4345	0.874204	4.95047	75.1677	24.8323									2	9	43	7.3182	5.90396	0.839191	4.85047	66.2795	33.7205
	2	8	345	5.96109	4.85283	0.845049	3.30093	55.3747	44.6253									2	7	1	6.45831	5.69026	0.930375	1.60537	24.8574	24.8574									2	7	194	5.69007	4.49451	0.853062	1.92466	33.8249	33.8249
	2	3	269	9.21188	7.55517	0.845646	5.09251	55.282	44.718									2	3	11	5.4239	4.62262	0.912622	4.07078	75.0527	24.9473									2	12	23	5.10207	4.30459	0.890774	3.3707	66.0652	33.9348
	2	4	74	7.31746	5.85218	0.854952	3.28439	44.8842	44.8842									2	11	65	5.18085	4.45972	0.924518	3.88047	74.9002	25.0998									2	7	244	11.4116	9.70608	0.874619	7.53238	66.0061	33.9939
	2	11	20	8.87375	7.74237	0.912728	4.89082	55.1156	44.8844									2	17	31	6.50149	5.64594	0.934208	4.86916	74.8929	25.1071									2	3	61	5.57004	4.66484	0.897149	3.66386	65.7781	34.2219
	2	14	5	8.81866	7.60373	0.901087	4.85683	55.0745	44.9255									2	12	11	6.15958	4.88262	0.842343	1.55059	25.1736	25.1736									2	8	78	5.31799	4.22903	0.841473	1.82428	34.3039	34.3039
	2	9	13	8.11236	6.75742	0.88414	3.64729	44.9597	44.9597									2	15	261	14.4714	12.5132	0.878492	10.8215	74.7783	25.2217									2	4	49	5.75763	4.56867	0.843682	1.9757	34.3145	34.3145
	2	15	1	6.77714	5.75612	0.894746	3.72465	54.9589	45.0411									2	2	303	4.78915	3.91189	0.861682	1.21304	25.3289	25.3289									2	8	202	7.90231	6.35478	0.829731	5.17019	65.4263	34.5737
	2	6	91	6.73283	5.59303	0.878623	3.69853	54.9327	45.0673									2	5	14	7.17425	5.98538	0.87443	1.81833	25.3452	25.3452									2	13	35	4.71264	3.99747	0.917133	3.07458	65.2412	34.7588
	2	5	12	7.10629	6.16033	0.916639	3.89885	54.8648	45.1352									2	13	100	4.7328	3.97347	0.913293	1.20343	25.4275	25.4275									2	11	7	5.21434	4.39211	0.930344	1.81827	34.8705	34.8705
	2	6	64	5.79229	4.91219	0.906949	3.17308	54.7811	45.2189									2	18	16	6.05168	5.01263	0.879813	4.51147	74.549	25.451									2	7	196	5.41476	4.36136	0.851888	3.51797	64.9701	35.0299
	2	4	23	10.4002	8.99945	0.897766	4.70567	45.2459	45.2459									2	18	50	8.50144	7.25435	0.894316	2.16548	25.472	25.472									2	2	70	5.23058	4.36801	0.875548	1.83832	35.1456	35.1456
	2	7	3	7.04805	5.94732	0.882901	3.19336	45.3084	45.3084									2	13	69	4.34135	3.44029	0.850504	1.10703	25.4997	25.4997									2	11	10	5.81397	4.99347	0.920146	2.05334	35.3173	35.3173
	2	11	356	7.04736	5.75181	0.866123	3.85351	54.6801	45.3199									2	16	8	7.64235	6.736	0.954958	1.96104	25.6601	25.6601									2	2	85	5.891	4.98826	0.9029	3.80847	64.649	35.351
	2	6	67	5.22752	4.06615	0.809104	2.36924	45.3225	45.3225									2	4	76	12.0317	10.668	0.912	3.10137	25.7766	25.7766									2	2	64	4.26809	3.55558	0.907171	1.51394	35.4711	35.4711
	2	14	358	6.23138	5.1233	0.855036	2.82497	45.3346	45.3346									2	11	457	14.2046	11.8177	0.847198	10.5369	74.1794	25.8206									2	12	21	5.23813	4.43069	0.902347	1.87887	35.8692	35.8692
	2	14	316	5.89146	4.94793	0.88597	2.67534	45.4105	45.4105									2	18	31	6.21938	5.10854	0.857858	1.62314	26.098	26.098									2	5	17	7.16088	6.2282	0.927362	2.57454	35.9529	35.9529
	2	6	338	8.25238	6.78873	0.845001	4.49832	54.5094	45.4906									2	11	56	6.93922	5.80362	0.879051	5.11488	73.7097	26.2903									2	8	250	7.25459	6.21984	0.904999	4.63851	63.9389	36.0611
	2	12	310	9.46768	7.99217	0.867979	5.156	54.459	45.541									2	4	311	10.0483	8.48026	0.878544	7.40041	73.6482	26.3518									2	6	118	7.76333	6.35064	0.832264	2.80171	36.089	36.089
	2	6	94	7.06817	6.14906	0.916209	3.22123	45.5738	45.5738									2	11	350	5.79471	4.71285	0.847531	1.52943	26.3936	26.3936									2	8	19	5.85238	5.08537	0.915313	3.71566	63.4897	36.5103
	2	6	274	7.95289	6.48678	0.852201	3.62812	45.6202	45.6202									2	9	86	4.37005	3.59429	0.890085	3.21479	73.5641	26.4359									2	5	9	7.07628	6.0091	0.89703	4.48801	63.4233	36.5767
	2	4	114	8.55891	6.99828	0.837083	4.64847	54.3115	45.6885									2	17	26	9.79871	8.66062	0.932036	7.20101	73.4894	26.5106									2	9	45	8.05744	6.79957	0.892348	5.10574	63.3667	36.6333
	2	6	337	6.76606	5.53472	0.845009	3.67468	54.3105	45.6895									2	11	83	6.3647	5.06039	0.822828	1.69895	26.6934	26.6934									2	4	1	5.20225	4.22687	0.871392	3.29449	63.3283	36.6717
	2	3	28	8.53271	7.29705	0.895333	4.63413	54.3101	45.6899									2	4	310	4.49676	3.72378	0.89027	3.29574	73.2915	26.7085									2	8	83	5.30049	4.40117	0.899667	3.35149	63.2298	36.7702
	2	11	2	7.17006	6.35964	0.93326	3.8913	54.2715	45.7285									2	19	397	3.56171	2.73409	0.836526	0.951855	26.7247	26.7247									2	4	47	4.47558	3.76873	0.918198	2.8282	63.1919	36.8081
	2	1	3	10.1218	8.65695	0.882862	5.49291	54.2683	45.7317									2	8	12	8.93704	8.05966	0.964157	2.39575	26.8069	26.8069									2	15	229	5.35827	4.30474	0.845822	3.38317	63.1393	36.8607
	2	15	10	7.82205	6.36847	0.814196	4.24379	54.2542	45.7458									2	15	256	5.25148	4.16739	0.857396	1.41122	26.8727	26.8727									2	11	13	9.24935	8.08172	0.918918	3.41143	36.8829	36.8829
	2	6	85	7.43288	6.12782	0.842585	4.03178	54.2425	45.7575									2	19	43	5.25017	4.23993	0.851317	3.82236	72.8046	27.1954									2	2	61	6.19826	5.20802	0.884863	3.90942	63.0729	36.9271
	2	8	10	6.6179	5.7016	0.915399	3.58617	54.189	45.811									2	14	33	6.77084	5.81588	0.916826	4.92291	72.7075	27.2925									2	3	108	6.04793	4.8781	0.846662	2.23417	36.941	36.941
	2	14	19	7.75577	6.68485	0.918718	3.56094	45.9134	45.9134									2	14	17	6.55343	5.43827	0.87924	1.79858	27.4449	27.4449									2	11	19	2.60683	2.11038	0.932939	1.64281	63.0196	36.9804
	2	6	341	7.27662	5.96383	0.845	3.34099	45.914	45.914									2	12	7	7.9354	7.03502	0.962462	2.1816	27.492	27.492									2	6	20	5.61579	4.78503	0.916005	3.53892	63.0172	36.9828
	2	13	4	9.51098	7.98771	0.874521	4.36826	45.9286	45.9286									2	1	132	9.13316	7.64817	0.869956	6.5975	72.2368	27.7632									2	4	61	8.77779	7.5664	0.901131	5.5282	62.9794	37.0206
	2	15	6	7.5625	6.32502	0.893505	4.08554	54.0237	45.9763									2	19	134	4.51664	3.53207	0.833215	3.25768	72.1262	27.8738									2	12	6	7.29859	6.17803	0.89237	4.59563	62.966	37.034
	2	4	189	10.1069	8.39883	0.851886	5.45829	54.0058	45.9942									2	1	289	8.16834	6.60788	0.848686	2.29416	28.086	28.086									2	4	79	5.16516	4.39738	0.907365	1.91314	37.0394	37.0394
	2	8	1	6.92149	6.02091	0.920601	3.73793	54.0048	45.9952									2	12	13	5.778	5.02118	0.929126	1.62718	28.1617	28.1617									2	3	174	4.95352	4.07977	0.876101	1.83862	37.1175	37.1175
	2	7	343	8.67401	7.04669	0.833499	4.68029	53.9576	46.0424									2	19	75	2.18281	1.66055	0.859842	0.616478	28.2424	28.2424									2	14	31	8.83042	7.76816	0.922263	5.55053	62.857	37.143
	2	11	3	8.93572	7.76842	0.898531	4.11694	46.0728	46.0728									2	11	455	7.14183	6.00843	0.888049	5.11824	71.6657	28.3343									2	7	245	6.48307	5.4859	0.905278	2.4125	37.2123	37.2123
	2	14	11	7.72832	6.58131	0.904274	4.16712	53.9202	46.0798									2	19	407	7.97333	6.72271	0.863451	5.71242	71.644	28.356									2	9	11	6.73977	5.65618	0.895172	4.23123	62.78	37.22
	2	11	304	6.49508	5.37544	0.87296	2.99538	46.1177	46.1177									2	14	9	5.30881	4.55491	0.943073	3.787	71.3342	28.6658									2	4	38	6.95995	5.73782	0.868783	4.3652	62.7188	37.2812
	2	6	342	8.43241	6.95601	0.85312	4.53947	53.8337	46.1663									2	17	1	6.16032	5.23053	0.909359	4.39189	71.2931	28.7069									2	7	83	6.78276	5.25627	0.808646	2.53645	37.3956	37.3956
	2	10	20	9.53398	8.12492	0.888101	4.40798	46.2344	46.2344									2	9	8	4.35793	3.38149	0.823519	1.25244	28.7393	28.7393									2	3	30	8.67429	7.13146	0.847868	3.24816	37.4459	37.4459
	2	2	266	7.36654	6.23525	0.89401	3.41149	46.3106	46.3106									2	7	23	9.01314	7.76423	0.912328	2.59155	28.753	28.753									2	5	7	4.99331	4.23451	0.916794	1.87083	37.4667	37.4667
	2	11	5	6.44722	5.52758	0.910321	2.98765	46.3401	46.3401									2	19	94	9.13138	7.84052	0.901103	2.65143	29.0365	29.0365									2	2	80	4.44125	3.71708	0.916836	1.66492	37.4876	37.4876
	2	5	8	6.37753	5.37305	0.897487	2.95837	46.3873	46.3873									2	9	70	7.72558	6.54037	0.89088	2.25005	29.1247	29.1247									2	4	89	5.8105	4.90486	0.896852	3.62807	62.4399	37.5601
	2	12	311	9.27235	7.48594	0.823451	4.97101	53.6111	46.3889									2	1	122	9.08043	7.46273	0.838996	2.65892	29.2819	29.2819									2	2	89	3.82251	3.18982	0.900944	1.43671	37.5854	37.5854
	2	8	280	8.4514	7.09504	0.862915	4.52908	53.5897	46.4103									2	15	46	4.2029	3.46482	0.89753	2.97091	70.6872	29.3128									2	3	169	8.40817	6.79462	0.824323	5.24285	62.3542	37.6458
	2	8	20	9.39066	8.17717	0.911995	4.35951	46.4239	46.4239									2	15	464	11.9354	9.71523	0.834144	3.50051	29.3287	29.3287									2	10	216	4.81693	3.90894	0.863247	2.99253	62.1254	37.8746
	2	9	16	7.91891	6.80195	0.905736	3.6776	46.4407	46.4407									2	9	344	4.56319	3.83094	0.896206	3.22445	70.6622	29.3378									2	9	65	4.97406	4.17141	0.911462	1.89328	38.063	38.063
	2	2	14	8.2492	7.08283	0.896122	4.41776	53.5537	46.4463									2	13	6	5.73783	4.74463	0.872681	4.05339	70.6432	29.3568									2	4	70	7.59805	6.59873	0.911824	2.89276	38.0724	38.0724
	2	7	13	8.80342	7.90401	0.954445	4.08909	46.4489	46.4489									2	19	54	6.07176	5.13177	0.906018	4.28131	70.5119	29.4881									2	9	72	5.75099	4.90124	0.903063	3.56084	61.917	38.083
	2	5	14	6.4169	5.43308	0.896733	2.98285	46.4843	46.4843									2	16	374	9.20919	7.91207	0.889501	6.49303	70.5059	29.4941									2	2	94	5.2369	4.29159	0.896816	3.24252	61.9168	38.0832
	2	14	7	7.76363	6.83452	0.923266	3.60997	46.4985	46.4985									2	4	45	11.51	9.515	0.81932	3.39564	29.5017	29.5017									2	4	9	9.72657	8.34993	0.877928	6.02013	61.8936	38.1064
	2	13	10	10.0961	9.14271	0.943098	5.40159	53.5015	46.4985									2	1	427	9.02028	7.45658	0.85519	6.34772	70.3716	29.6284									2	6	54	7.97165	6.79751	0.886452	4.93181	61.8669	38.1331
	2	11	19	9.94172	8.55458	0.897253	5.31701	53.4818	46.5182									2	13	57	8.41626	7.26481	0.92014	5.91193	70.2441	29.7559									2	1	22	5.3072	4.42788	0.896225	3.28115	61.8244	38.1756
	2	8	5	8.92147	7.74261	0.893177	4.15317	46.5525	46.5525									2	4	85	7.87344	6.71408	0.901344	2.34576	29.7933	29.7933									2	2	167	4.97603	3.81114	0.819192	1.90022	38.1876	38.1876
	2	10	290	7.85309	6.55444	0.875704	4.1957	53.4273	46.5727									2	13	95	6.20469	5.04532	0.844106	1.84946	29.8075	29.8075									2	4	2	6.43177	5.30984	0.864087	2.45862	38.2262	38.2262
	2	7	12	6.72366	5.79224	0.915713	3.59009	53.395	46.605									2	1	38	7.04645	5.84061	0.877073	2.10041	29.8081	29.8081									2	3	240	19.7231	16.4282	0.827388	7.55905	38.3258	38.3258
	2	15	11	7.859	6.41186	0.8613	4.18942	53.3073	46.6927									2	10	23	4.52957	3.96356	0.950123	1.35184	29.8448	29.8448									2	13	31	5.53855	4.59417	0.890469	2.13001	38.4579	38.4579
	2	8	3	7.27861	6.30753	0.915884	3.87974	53.3034	46.6966									2	13	359	8.88216	7.56414	0.891832	6.22529	70.0876	29.9124									2	12	3	5.77761	4.88052	0.891941	2.22351	38.4851	38.4851
	2	4	331	7.68762	6.19574	0.829685	4.09582	53.2781	46.7219									2	3	7	4.22852	3.26647	0.831547	1.26544	29.9263	29.9263									2	4	115	7.3636	6.35863	0.920105	2.8363	38.5178	38.5178
	2	9	6	9.01505	7.68083	0.882827	4.80255	53.2726	46.7274									2	19	25	9.79708	7.99459	0.832102	6.85718	69.9921	30.0079									2	5	18	5.3174	4.40336	0.887161	2.05169	38.5845	38.5845
	2	11	305	6.58429	5.38931	0.865351	3.07732	46.7372	46.7372									2	15	80	6.40434	5.58244	0.922398	4.47619	69.8931	30.1069									2	1	24	8.75322	7.56278	0.907502	3.37808	38.5924	38.5924
	2	12	9	12.3845	10.1289	0.843157	6.59568	53.2576	46.7424									2	18	20	6.37283	5.34785	0.883139	1.92414	30.1928	30.1928									2	7	95	8.39994	7.23829	0.905849	5.12442	61.0054	38.9946
	2	14	263	8.61297	7.3415	0.867545	4.02655	46.7499	46.7499									2	13	93	4.52149	3.73008	0.888627	1.36522	30.194	30.194									2	15	13	10.2787	8.75778	0.87041	6.26934	60.9938	39.0062
	2	2	11	7.9478	6.92412	0.924542	4.23093	53.234	46.766									2	15	255	7.08832	6.01326	0.898089	4.93754	69.6574	30.3426									2	8	36	7.65388	6.68162	0.916535	4.66828	60.9924	39.0076
	2	11	301	7.70075	6.31597	0.840124	3.60215	46.7767	46.7767									2	8	9	7.57488	6.41771	0.901511	2.29856	30.3445	30.3445									2	15	6	9.46372	8.15827	0.894229	5.77173	60.988	39.012
	2	4	137	8.66889	6.91401	0.819382	4.61363	53.2205	46.7795									2	7	442	6.72716	5.55523	0.888513	2.04195	30.3538	30.3538									2	3	80	6.51906	5.25621	0.834152	2.55299	39.162	39.162
	2	3	9	8.10969	6.87353	0.890479	4.3156	53.2154	46.7846									2	7	19	6.25284	5.20867	0.892967	1.89831	30.3591	30.3591									2	13	9	6.22948	5.27364	0.915311	3.78948	60.8314	39.1686
	2	6	275	7.73135	6.34882	0.844977	3.61714	46.7853	46.7853									2	15	9	6.80908	5.74346	0.906716	4.73641	69.5602	30.4398									2	6	47	5.16045	3.97388	0.824631	2.02187	39.18	39.18
	2	4	105	8.18471	6.9312	0.893034	4.35463	53.2044	46.7956									2	15	4	6.27396	5.44888	0.910216	4.36229	69.5301	30.4699									2	8	66	7.71565	6.31767	0.856959	3.02548	39.2123	39.2123
	2	8	286	8.02928	6.90754	0.915793	4.26901	53.168	46.832									2	19	56	7.15971	6.13968	0.908464	2.18218	30.4786	30.4786									2	8	92	9.50151	8.15488	0.907326	5.77556	60.7857	39.2143
	2	13	2	6.54847	5.73013	0.927106	3.06797	46.8502	46.8502									2	10	20	5.88845	4.87228	0.886095	1.79568	30.495	30.495									2	12	19	6.48342	5.67849	0.944631	2.54661	39.2788	39.2788
	2	9	288	7.89734	6.64041	0.887873	3.70769	46.9486	46.9486									2	11	109	10.0427	8.94974	0.930743	6.97658	69.4694	30.5306									2	13	42	5.17685	4.37776	0.907707	2.03566	39.3224	39.3224
	2	5	272	8.11819	6.95288	0.888196	4.30676	53.0507	46.9493									2	4	439	2.0982	1.58848	0.845	0.641974	30.5964	30.5964									2	8	1	4.50254	3.7183	0.891421	1.77831	39.4956	39.4956
	2	10	289	8.66415	7.36052	0.896482	4.59594	53.0455	46.9545									2	9	34	6.74682	5.76443	0.909377	4.677	69.3215	30.6785									2	7	81	4.39783	3.58504	0.892191	1.74062	39.5791	39.5791
	2	13	315	11.7522	9.99263	0.858418	6.22764	52.9913	47.0087									2	11	59	5.48228	4.37938	0.844629	3.79852	69.2872	30.7128									2	13	224	7.91525	6.18775	0.792454	3.14147	39.6888	39.6888
	2	12	18	7.42115	6.28427	0.892421	3.93044	52.9627	47.0373									2	1	104	5.19935	4.37183	0.905787	3.59395	69.1231	30.8769									2	2	57	7.91292	6.40833	0.828556	3.14262	39.7151	39.7151
	2	5	9	7.0591	6.02272	0.898193	3.32121	47.0486	47.0486									2	4	312	11.573	9.41129	0.825083	7.99908	69.1187	30.8813									2	8	2	7.48291	6.30061	0.866427	4.51088	60.2824	39.7176
	2	6	86	8.079	6.85821	0.893242	3.80187	47.0587	47.0587									2	5	19	8.54728	6.95282	0.837481	2.64192	30.9095	30.9095									2	2	37	6.46582	5.54222	0.90922	2.57991	39.9007	39.9007
	2	15	4	7.68368	6.59414	0.906611	4.06612	52.919	47.081									2	9	17	6.13737	4.887	0.831038	4.23812	69.0543	30.9457									2	2	14	8.28771	7.01396	0.905133	4.9747	60.025	39.975
	2	2	4	7.04979	6.13108	0.923738	3.31955	47.0871	47.0871									2	19	103	4.7803	4.02775	0.904097	3.29956	69.024	30.976									2	8	15	7.73155	6.56272	0.889481	4.62721	59.8484	40.1516
	2	15	320	6.13184	4.9996	0.84977	2.89148	47.1552	47.1552									2	2	65	6.92423	5.68768	0.873505	2.14725	31.0106	31.0106									2	1	14	6.01578	5.05627	0.902054	3.59985	59.8402	40.1598
	2	10	298	7.08303	5.53457	0.812288	3.73577	52.7425	47.2575									2	19	55	4.91437	4.12176	0.901238	3.38971	68.9755	31.0245									2	7	5	5.92434	4.98644	0.898432	3.54274	59.7997	40.2003
	2	6	103	6.34551	5.37565	0.892762	3.34583	52.7275	47.2725									2	2	301	5.36667	4.40237	0.852834	1.66889	31.0973	31.0973									2	2	13	8.96719	7.55397	0.874581	3.60965	40.254	40.254
	2	9	4	9.85617	8.58353	0.891643	4.66704	47.3515	47.3515									2	11	62	6.38842	5.31568	0.881203	1.99124	31.1696	31.1696									2	15	5	7.1573	5.95869	0.882442	4.26957	59.6533	40.3467
	2	12	8	6.35915	5.29532	0.865383	3.012	47.3648	47.3648									2	1	429	19.9069	17.0658	0.860438	6.21245	31.2075	31.2075									2	6	37	7.83595	6.73414	0.906034	3.16187	40.3508	40.3508
	2	10	32	9.44995	7.99712	0.868843	4.47836	47.3903	47.3903									2	10	3	5.13732	4.40184	0.928823	3.5294	68.7013	31.2987									2	10	5	7.20109	6.10985	0.90415	4.29516	59.646	40.354
	2	8	285	6.84197	5.56823	0.828976	3.59936	52.6071	47.3929									2	1	101	7.0187	5.88725	0.889773	4.82119	68.6906	31.3094									2	10	24	6.65881	5.67748	0.896089	3.97094	59.6344	40.3656
	2	9	9	8.47398	7.40316	0.908341	4.01818	47.4178	47.4178									2	19	404	6.65827	5.54717	0.882178	2.08495	31.3138	31.3138									2	10	52	8.93062	7.43594	0.865676	5.32349	59.6095	40.3905
	2	6	75	7.54636	5.90754	0.8088	3.96597	52.5547	47.4453									2	9	5	7.24307	6.01161	0.875584	2.27753	31.4442	31.4442									2	9	52	6.5878	5.77947	0.927775	2.6628	40.4202	40.4202
	2	9	7	5.79509	5.00969	0.927109	3.04539	52.5513	47.4487									2	4	89	8.28416	7.17837	0.902036	2.60975	31.5029	31.5029									2	5	8	6.48126	5.54511	0.916408	3.8611	59.5732	40.4268
	2	15	13	7.14162	6.10772	0.90125	3.75298	52.5508	47.4492									2	5	320	10.3182	8.4583	0.825388	7.06178	68.44	31.56									2	8	11	6.65152	5.26579	0.828377	3.95185	59.4127	40.5873
	2	11	11	7.15618	6.28219	0.933503	3.75113	52.4181	47.5819									2	5	74	5.27809	4.3262	0.852822	1.66652	31.5744	31.5744									2	7	88	6.54826	5.63773	0.908107	2.66308	40.6685	40.6685
	2	10	295	6.47831	5.51112	0.900014	3.08379	47.6017	47.6017									2	18	47	6.86551	5.82059	0.898468	4.69596	68.3993	31.6007									2	13	260	13.7978	11.4765	0.845022	8.18604	59.3286	40.6714
	2	10	33	8.38627	7.25437	0.907363	4.39369	52.3914	47.6086									2	5	72	5.46849	4.53628	0.867338	1.72854	31.6092	31.6092									2	4	69	5.19306	4.46619	0.920211	2.11228	40.675	40.675
	2	10	27	9.78976	8.5179	0.905312	4.66116	47.6126	47.6126									2	13	459	13.0914	11.1606	0.891791	4.1534	31.7262	31.7262									2	11	21	9.67564	8.56345	0.91258	5.73934	59.3174	40.6826
	2	2	1	8.61425	6.95551	0.852249	4.51216	52.3802	47.6198									2	7	24	9.45435	8.11817	0.900512	6.45144	68.2378	31.7622									2	8	197	6.7905	5.50924	0.839904	4.0239	59.2579	40.7421
	2	8	21	10.8393	9.41636	0.894044	5.67715	52.3754	47.6246									2	6	330	14.0052	11.9111	0.893389	4.45731	31.8262	31.8262									2	2	239	6.44181	5.24661	0.833053	2.6279	40.7944	40.7944
	2	12	4	9.85773	8.1509	0.84725	4.69907	47.6688	47.6688									2	7	29	15.7409	13.9892	0.916404	10.7192	68.0975	31.9025									2	10	39	6.58854	5.33369	0.833071	3.89329	59.0918	40.9082
	2	12	7	6.20777	4.9956	0.822511	2.96094	47.6973	47.6973									2	13	80	5.36163	4.22928	0.822443	3.65016	68.0794	31.9206									2	9	53	7.06542	5.97958	0.89852	4.17079	59.031	40.969
	2	6	276	7.71772	6.16739	0.822658	3.68131	47.6994	47.6994									2	12	3	7.65174	6.53138	0.90128	2.44691	31.9785	31.9785									2	13	16	3.98849	3.29222	0.901805	1.63417	40.9722	40.9722
	2	3	32	6.75179	5.68906	0.892524	3.22086	47.7038	47.7038									2	1	2	4.73343	3.84778	0.870379	1.51373	31.9796	31.9796									2	9	50	8.66446	7.64113	0.920362	5.11441	59.0274	40.9726
	2	3	13	5.87641	4.60197	0.834979	3.07138	52.2662	47.7338									2	10	4	8.7631	7.49362	0.901213	2.80581	32.0185	32.0185									2	5	13	4.13861	3.40426	0.892701	1.69699	41.0039	41.0039
	2	7	279	8.4114	7.51227	0.92746	4.01811	47.7698	47.7698									2	11	112	9.54762	8.25738	0.900674	6.48022	67.8726	32.1274									2	12	20	6.81757	5.89232	0.917072	4.02176	58.991	41.009
	2	12	5	5.57486	4.71126	0.918302	2.90939	52.1878	47.8122									2	9	60	6.8579	5.52751	0.851999	2.20442	32.1442	32.1442									2	9	254	7.73696	6.35342	0.845055	4.56407	58.9904	41.0096
	2	4	159	7.0637	5.65997	0.834726	3.68503	52.1685	47.8315									2	19	403	4.83953	3.81847	0.838522	1.55782	32.1895	32.1895									2	11	24	5.87501	5.04786	0.907698	2.41255	41.0646	41.0646
	2	1	6	5.8746	5.17787	0.955079	2.81036	47.8392	47.8392									2	2	41	8.20952	6.70358	0.846348	2.64496	32.2182	32.2182									2	8	4	6.14208	5.21754	0.903445	3.6191	58.9231	41.0769
	2	3	326	10.0307	8.66366	0.895584	4.80288	47.8819	47.8819									2	19	52	7.01339	5.9026	0.894923	4.74213	67.6153	32.3847									2	5	6	4.27615	3.58022	0.909937	2.51926	58.9143	41.0857
	2	10	11	5.86208	4.65886	0.820282	3.05492	52.1133	47.8867									2	10	15	10.3472	9.08872	0.935153	6.99457	67.5985	32.4015									2	12	11	9.1919	7.9531	0.90429	3.77788	41.1001	41.1001
	2	11	12	10.2551	8.55059	0.866391	4.9127	47.905	47.905									2	13	87	6.44382	5.51299	0.91464	4.34644	67.4514	32.5486									2	8	40	5.93618	5.02849	0.90863	2.44201	41.1377	41.1377
	2	13	313	8.3689	7.40209	0.930086	4.35964	52.0933	47.9067									2	19	53	6.98681	6.08169	0.915933	4.70881	67.3957	32.6043									2	8	65	3.64339	2.78153	0.861182	2.14441	58.8576	41.1424
	2	12	357	10.5412	8.83872	0.858478	5.05041	47.911	47.911									2	4	60	4.80738	3.7149	0.823386	1.5721	32.7018	32.7018									2	7	28	9.9806	8.64612	0.902916	4.11123	41.1922	41.1922
	2	6	21	8.22493	6.96802	0.897051	3.9415	47.9213	47.9213									2	9	53	5.92179	4.99668	0.912952	3.98257	67.2528	32.7472									2	9	27	6.82901	5.87874	0.910776	4.01547	58.8002	41.1998
	2	14	317	8.20518	6.83924	0.886037	3.93465	47.9533	47.9533									2	19	74	4.28556	3.36423	0.848176	1.40885	32.8744	32.8744									2	3	176	9.54529	7.94051	0.852271	3.9376	41.2517	41.2517
	2	12	307	7.80039	6.55311	0.874219	3.74691	48.035	48.035									2	9	29	7.09816	6.13018	0.911348	2.33656	32.9179	32.9179									2	3	18	8.06132	6.77616	0.876476	4.73522	58.74	41.26
	2	7	9	8.94723	7.87068	0.918902	4.30419	48.1064	48.1064									2	11	94	4.77583	3.95332	0.891009	1.57887	33.0596	33.0596									2	14	1	6.6079	5.64211	0.911697	2.72647	41.2608	41.2608
	2	4	45	9.19476	7.85966	0.878297	4.76781	51.8536	48.1464									2	14	40	5.74589	4.8933	0.899429	1.90213	33.1041	33.1041									2	1	2	8.56194	7.39842	0.927938	3.54052	41.3518	41.3518
	2	4	334	8.81294	7.34393	0.858139	4.56789	51.8316	48.1684									2	8	4	5.13857	4.4076	0.919519	1.70481	33.1768	33.1768									2	2	69	5.7141	4.85597	0.910277	3.35078	58.6406	41.3594
	2	11	14	7.85684	6.57209	0.890907	3.7895	48.2318	48.2318									2	19	14	8.48953	7.2033	0.89456	5.67284	66.8216	33.1784									2	9	8	7.17458	6.06311	0.884108	2.97487	41.464	41.464
	2	13	7	8.46427	7.5197	0.932657	4.08655	48.28	48.28									2	19	400	5.92842	4.89062	0.844694	1.96696	33.1785	33.1785									2	3	2	7.40847	6.24153	0.882616	4.333	58.4871	41.5129
	2	4	1	7.56389	6.49342	0.893854	3.65198	48.2817	48.2817									2	1	299	9.60751	7.93156	0.854736	6.41909	66.8132	33.1868									2	2	35	5.69404	4.86609	0.917069	3.32591	58.4104	41.5896
	2	2	6	6.41933	5.69322	0.942659	3.31909	51.7046	48.2954									2	10	22	4.23453	3.50238	0.90469	2.82637	66.7458	33.2542									2	13	8	6.71712	5.67364	0.896296	2.79372	41.591	41.591
	2	10	28	7.38976	6.35314	0.907487	3.82068	51.7023	48.2977									2	5	3	4.54399	3.73492	0.881773	1.51285	33.2935	33.2935									2	2	47	4.57565	3.56676	0.854353	2.66857	58.3212	41.6788
	2	8	348	7.5994	6.45314	0.905187	3.67062	48.3014	48.3014									2	19	24	5.83698	4.82325	0.870477	3.89038	66.6506	33.3494									2	6	180	6.16585	4.97022	0.834917	2.57017	41.6839	41.6839
	2	7	14	8.54309	7.45368	0.920415	4.41569	51.6872	48.3128									2	14	23	5.84073	4.60695	0.860136	1.94879	33.3655	33.3655									2	15	17	7.95754	6.83399	0.898163	4.62062	58.0659	41.9341
	2	9	1	7.69841	6.65549	0.913476	3.97875	51.6827	48.3173									2	17	13	6.3416	5.44596	0.92292	4.22278	66.5886	33.4114									2	15	54	6.54552	5.27203	0.857511	2.74544	41.9437	41.9437
	2	4	102	9.84733	8.48448	0.888543	4.76124	48.3506	48.3506									2	13	26	10.2199	8.24797	0.814321	3.42017	33.4658	33.4658									2	13	21	7.72096	6.54891	0.914386	3.24074	41.9733	41.9733
	2	6	339	6.64262	5.35022	0.834393	3.43068	51.6465	48.3535									2	14	29	7.04417	6.01629	0.90473	4.68551	66.5162	33.4838									2	3	10	8.60734	7.27131	0.871261	3.61803	42.0342	42.0342
	2	1	1	8.46186	7.50492	0.938234	4.36799	51.6197	48.3803									2	16	5	7.029	6.14905	0.925688	4.66679	66.3933	33.6067									2	11	17	7.20564	6.31496	0.924508	4.1726	57.9075	42.0925
	2	4	158	6.79601	5.74602	0.90141	3.2895	48.4034	48.4034									2	7	30	9.01981	7.81029	0.909514	3.04001	33.7037	33.7037									2	6	8	9.26557	7.89531	0.872096	3.90254	42.1187	42.1187
	2	3	270	6.52495	5.60497	0.905858	3.15865	48.4088	48.4088									2	19	57	6.92623	5.89668	0.90736	2.33684	33.7389	33.7389									2	6	2	6.06179	5.12557	0.907076	3.50655	57.8467	42.1533
	2	12	17	8.41341	6.77605	0.804072	4.07292	48.4098	48.4098									2	4	77	5.85651	4.91296	0.890343	3.87547	66.1738	33.8262									2	12	5	8.73262	7.51477	0.904125	3.68263	42.171	42.171
	2	9	349	7.51966	6.47336	0.911403	3.64373	48.456	48.456									2	19	95	5.73766	4.61218	0.856967	1.94301	33.8641	33.8641									2	2	34	8.05486	6.6768	0.864665	3.40044	42.2161	42.2161
	2	5	1	11.4647	10.1569	0.9027	5.90818	51.5334	48.4666									2	13	7	9.33959	7.55897	0.852337	6.1758	66.125	33.875									2	4	43	7.27253	6.19773	0.898199	3.07056	42.2213	42.2213
	2	10	1	7.06971	6.08594	0.917161	3.63871	51.4691	48.5309									2	18	27	6.87979	5.81543	0.887498	4.53843	65.9676	34.0324									2	6	44	7.97393	6.79218	0.907515	4.60524	57.7537	42.2463
	2	7	5	8.54219	7.15943	0.878327	4.38961	51.3874	48.6126									2	6	9	10.4154	8.98881	0.906655	3.55459	34.1281	34.1281									2	9	205	4.72592	3.84749	0.890374	1.99923	42.3036	42.3036
	2	10	12	9.56297	8.11983	0.85607	4.65049	48.6302	48.6302									2	18	387	6.48424	5.32731	0.853846	4.26704	65.8064	34.1936									2	10	31	5.99501	5.00309	0.877139	3.45746	57.6722	42.3278
	2	15	9	7.73818	6.71782	0.936974	3.97468	51.3646	48.6354									2	13	84	5.3572	4.55154	0.909559	3.52422	65.7847	34.2153									2	6	49	6.49253	5.6547	0.925056	2.75032	42.3614	42.3614
	2	10	353	8.42455	6.93599	0.845011	4.10066	48.6751	48.6751									2	11	4	11.2087	9.09753	0.830285	7.37201	65.7702	34.2298									2	2	3	7.57554	6.38345	0.895176	3.21461	42.4341	42.4341
	2	10	26	9.54023	8.2667	0.907854	4.89641	51.3238	48.6762									2	13	47	5.17656	4.37407	0.896648	1.77536	34.2962	34.2962									2	15	233	7.49644	6.45607	0.909329	4.31396	57.5468	42.4532
	2	15	8	6.17173	5.42546	0.958625	3.16622	51.302	48.698									2	4	90	3.93865	3.21355	0.871041	1.352	34.3264	34.3264									2	4	26	10.8071	9.27602	0.880927	4.59517	42.5201	42.5201
	2	7	6	6.61543	5.79329	0.932659	3.39369	51.2996	48.7004									2	18	391	7.0392	5.83825	0.865406	2.41633	34.3268	34.3268									2	8	5	7.20809	6.02685	0.878399	4.14162	57.4579	42.5421
	2	5	5	8.50345	7.44307	0.92009	4.3589	51.2604	48.7396									2	1	129	6.47305	5.39132	0.867346	2.22605	34.3895	34.3895									2	7	195	13.4501	11.1729	0.832697	7.72451	57.4307	42.5693
	2	10	25	6.82233	5.71421	0.880747	3.49612	51.2453	48.7547									2	5	77	4.9141	4.06755	0.889372	1.69104	34.4119	34.4119									2	15	68	7.71318	6.51958	0.900927	3.28445	42.5823	42.5823
	2	4	47	6.57976	5.29397	0.839427	3.20824	48.7592	48.7592									2	17	9	8.16835	6.95728	0.906443	2.8163	34.4782	34.4782									2	9	34	5.87549	4.85882	0.878496	2.50352	42.6095	42.6095
	2	3	44	8.58094	7.41602	0.901552	4.39536	51.2223	48.7777									2	2	13	4.75062	3.72758	0.826628	3.1113	65.4925	34.5075									2	7	47	13.8282	11.9223	0.87319	5.89963	42.6638	42.6638
	2	10	9	6.67945	5.57282	0.87718	3.42113	51.2187	48.7813									2	2	430	19.8517	17.3795	0.880756	6.85149	34.5133	34.5133									2	13	26	7.81017	6.68642	0.878343	3.33361	42.6829	42.6829
	2	1	2	7.66323	6.6512	0.91936	3.739	48.7915	48.7915									2	10	345	8.37245	7.12546	0.893533	5.48239	65.4812	34.5188									2	15	44	5.90215	5.06073	0.921264	2.52303	42.7477	42.7477
	2	14	4	10.5712	9.56071	0.933962	5.4103	51.1796	48.8204									2	9	64	10.3031	9.02699	0.926848	6.73999	65.4169	34.5831									2	7	46	8.08039	6.95302	0.899776	3.45871	42.8038	42.8038
	2	10	296	6.59718	5.49501	0.883462	3.37561	51.1675	48.8325									2	15	24	8.7415	7.12141	0.842818	3.0234	34.5868	34.5868									2	15	230	9.21699	7.55187	0.833357	5.26895	57.1656	42.8344
	2	2	12	10.3205	9.03268	0.89804	5.27637	51.125	48.875									2	1	70	7.95561	6.79266	0.885687	5.19484	65.2978	34.7022									2	2	88	7.05901	5.75062	0.859014	3.02491	42.8518	42.8518
	2	6	51	9.2394	7.59931	0.865079	4.71866	51.071	48.929									2	17	29	7.33566	6.4059	0.930559	2.55275	34.7991	34.7991									2	15	22	7.00295	5.92467	0.893464	4.00031	57.1233	42.8767
	2	2	9	5.6882	4.88922	0.924492	2.90292	51.0342	48.9658									2	7	3	6.59939	5.69536	0.925342	2.29781	34.8185	34.8185									2	8	54	7.58048	6.44472	0.889367	3.25048	42.8796	42.8796
	2	9	350	5.59867	4.38628	0.813447	2.85701	51.0301	48.9699									2	19	42	29.3388	25.457	0.876967	10.2317	34.8743	34.8743									2	10	257	8.33554	6.85981	0.844533	3.57468	42.8848	42.8848
	2	9	3	7.5703	6.54872	0.913305	3.86252	51.022	48.978									2	19	22	7.30371	5.97136	0.850128	4.75008	65.0366	34.9634									2	8	252	8.08936	6.8028	0.878059	4.61842	57.0925	42.9075
	2	10	30	6.64542	5.51575	0.886827	3.3882	50.9855	49.0145									2	14	4	3.62069	2.90039	0.888506	2.34911	64.8802	35.1198									2	9	55	5.19315	4.41046	0.906268	2.22898	42.9216	42.9216
	2	4	56	8.65515	7.11707	0.849033	4.41252	50.9814	49.0186									2	19	105	7.90515	6.49712	0.851007	5.12343	64.8112	35.1888									2	2	40	5.73386	4.56288	0.831991	3.26935	57.0183	42.9817
	2	14	319	9.93227	8.25513	0.873407	5.06217	50.9669	49.0331									2	3	24	5.66903	4.64937	0.856864	3.66811	64.7044	35.2956									2	3	68	10.0136	8.60491	0.878519	4.30406	42.982	42.982
	2	9	15	6.73189	5.81671	0.918213	3.303	49.065	49.065									2	17	32	4.25171	3.51543	0.877436	2.7508	64.6986	35.3014									2	6	34	7.5747	6.62164	0.922343	4.31747	56.9986	43.0014
	2	6	58	8.56857	6.99792	0.862006	4.36208	50.9078	49.0922									2	19	12	6.53229	5.23919	0.846332	2.32048	35.5232	35.5232									2	1	10	9.28956	8.13245	0.901977	3.99579	43.0138	43.0138
	2	12	20	11.2529	9.88566	0.902972	5.52732	49.1188	49.1188									2	14	26	5.31803	4.25103	0.815209	3.42376	64.3802	35.6198									2	7	60	6.71262	5.61269	0.889766	2.88898	43.038	43.038
	2	11	300	8.08379	6.77162	0.871261	3.9739	49.1589	49.1589									2	11	88	5.30741	4.34844	0.890611	3.41629	64.3684	35.6316									2	9	144	10.4876	8.52185	0.823005	5.96691	56.8949	43.1051
	2	12	309	5.94725	4.89887	0.842477	3.02268	50.8248	49.1752									2	18	393	19.7311	16.6694	0.844746	12.6837	64.283	35.717									2	4	87	7.97262	6.24501	0.807753	3.43714	43.1118	43.1118
	2	12	259	7.84354	6.88283	0.936597	3.85849	49.1932	49.1932									2	9	37	5.34437	4.35841	0.853476	3.42776	64.1377	35.8623									2	4	39	7.98361	6.86945	0.909734	4.53851	56.8478	43.1522
	2	14	17	7.97067	6.85532	0.909847	3.92218	49.2077	49.2077									2	11	86	6.85638	5.8373	0.899671	4.3914	64.0484	35.9516									2	1	5	8.87883	7.49851	0.877253	3.84245	43.2765	43.2765
	2	8	2	8.54387	7.49301	0.916193	4.20519	49.2188	49.2188									2	16	20	6.15632	5.28669	0.918984	3.9323	63.8742	36.1258									2	7	52	7.22301	5.88786	0.838761	4.09658	56.7157	43.2843
	2	14	1	5.38198	4.68339	0.935328	2.64954	49.2298	49.2298									2	9	340	5.57577	4.71659	0.911735	3.56014	63.8503	36.1497									2	2	75	5.70814	4.93719	0.936958	3.23492	56.6721	43.3279
	2	4	97	7.45045	6.23792	0.873524	3.78185	50.76	49.24									2	19	9	8.90246	7.66801	0.891305	5.68387	63.846	36.154									2	8	44	9.25847	7.95675	0.888711	5.24188	56.6171	43.3829
	2	8	281	7.17999	6.14562	0.921262	3.64359	50.7465	49.2535									2	10	2	5.15595	4.36649	0.913156	3.29105	63.8302	36.1698									2	9	51	5.04176	4.23156	0.904935	2.85404	56.608	43.392
	2	8	283	8.92225	7.14358	0.828648	4.39452	49.2535	49.2535									2	9	334	7.93343	6.77132	0.896615	5.05896	63.7676	36.2324									2	7	64	7.90405	6.77014	0.897356	4.47419	56.6064	43.3936
	2	2	2	7.70537	6.24994	0.850773	3.90938	50.7358	49.2642									2	15	368	7.45613	6.08179	0.860793	4.74843	63.6849	36.3151									2	8	38	7.11005	5.96344	0.864624	4.01916	56.5278	43.4722
	2	8	18	5.17434	4.09225	0.855715	2.54931	49.2683	49.2683									2	19	410	16.6602	13.6622	0.827733	6.05207	36.3265	36.3265									2	15	20	9.01562	7.34125	0.82925	5.09594	56.5235	43.4765
	2	6	3	8.6584	7.60415	0.912497	4.38967	50.6984	49.3016									2	4	308	8.75607	7.11568	0.835136	3.18304	36.3524	36.3524									2	4	7	4.95819	3.91007	0.826483	2.15724	43.5086	43.5086
	2	4	155	6.43579	5.07168	0.831601	3.17329	49.3069	49.3069									2	18	52	4.83611	3.90698	0.858756	1.75849	36.3617	36.3617									2	4	23	5.54528	4.36835	0.825081	2.41683	43.5835	43.5835
	2	10	6	7.88614	6.99843	0.933549	3.99643	50.6767	49.3233									2	13	81	5.20437	4.14087	0.852358	1.9006	36.5192	36.5192									2	5	10	20.5654	18.1624	0.913142	11.6013	56.4117	43.5883
	2	4	142	8.62316	7.01958	0.833547	4.25537	49.3482	49.3482									2	19	408	5.13995	4.23727	0.880472	1.87926	36.5618	36.5618									2	6	32	6.47461	5.204	0.833983	2.8274	43.669	43.669
	2	8	14	9.05763	7.59915	0.873219	4.58408	50.6102	49.3898									2	13	354	9.51489	7.95759	0.84311	6.01864	63.255	36.745									2	9	71	8.20764	7.1204	0.898172	3.5848	43.6764	43.6764
	2	6	18	5.89304	4.65862	0.826355	2.98122	50.5889	49.4111									2	1	123	6.96724	5.66329	0.833932	4.40472	63.2204	36.7796									2	13	38	8.72374	7.57763	0.909459	4.91174	56.3032	43.6968
	2	11	17	7.92808	6.60606	0.876061	3.91824	49.4223	49.4223									2	3	4	6.33321	5.34086	0.894962	2.33138	36.8119	36.8119									2	3	170	5.48914	4.34765	0.836838	3.08936	56.2812	43.7188
	2	3	16	6.59684	5.59049	0.894625	3.33636	50.5751	49.4249									2	18	14	4.7166	3.72668	0.831237	1.74068	36.9053	36.9053									2	2	24	6.7086	5.66423	0.901312	2.93682	43.777	43.777
	2	3	43	8.74761	7.5912	0.907586	4.32646	49.4587	49.4587									2	17	21	4.99691	4.30041	0.953378	3.15256	63.0902	36.9098									2	8	73	6.70007	5.57636	0.872692	3.76535	56.1987	43.8013
	2	2	13	7.70698	6.50159	0.89245	3.89184	50.4976	49.5024									2	4	75	4.01904	3.35063	0.930296	1.48578	36.9686	36.9686									2	2	168	6.19906	4.97517	0.842388	2.71937	43.8675	43.8675
	2	8	346	5.50752	4.45829	0.845	2.77909	50.4599	49.5401									2	17	376	5.97883	4.88234	0.865672	2.21306	37.0148	37.0148									2	7	50	6.13305	5.14454	0.894908	2.69051	43.8691	43.8691
	2	8	23	10.2255	8.79742	0.897143	5.06695	49.552	49.552									2	17	24	5.39403	4.49847	0.886003	3.38886	62.8261	37.1739									2	7	45	9.43859	7.68445	0.830426	5.29741	56.1251	43.8749
	2	5	10	9.76974	8.54655	0.909324	4.92611	50.4221	49.5779									2	15	35	9.90262	7.94049	0.812474	3.68667	37.2293	37.2293									2	2	91	7.99982	6.77085	0.891992	4.48415	56.0531	43.9469
	2	7	10	11.6484	10.1498	0.890502	5.77528	49.58	49.58									2	7	17	6.34766	5.41888	0.908218	2.3635	37.2342	37.2342									2	8	49	6.98925	5.58963	0.834795	3.91266	55.9812	44.0188
	2	3	46	7.25653	6.25182	0.907797	3.59782	49.5804	49.5804									2	13	355	7.91502	6.52083	0.856695	4.9679	62.7655	37.2345									2	8	62	6.67203	5.40199	0.829358	2.94405	44.1253	44.1253
	2	11	8	9.40434	8.02147	0.896541	4.66367	49.5907	49.5907									2	10	26	4.75296	3.67726	0.842979	1.77084	37.2576	37.2576									2	1	3	5.42402	4.61034	0.909243	3.02692	55.8058	44.1942
	2	15	12	7.75676	6.7238	0.908853	3.84762	49.6035	49.6035									2	1	117	6.74954	5.64825	0.864721	2.51575	37.2729	37.2729									2	4	90	6.85672	5.95972	0.911217	3.82367	55.7653	44.2347
	2	10	5	11.6024	9.78243	0.863509	5.84603	50.3866	49.6134									2	17	12	4.86734	4.05753	0.894629	3.05144	62.6922	37.3078									2	1	17	9.77755	8.3539	0.889813	4.32614	44.2457	44.2457
	2	10	354	10.2798	8.50419	0.845062	5.10086	49.6202	49.6202									2	3	305	8.38817	7.00622	0.867601	5.24339	62.5094	37.4906									2	9	40	7.85936	6.39939	0.854942	3.47851	44.2595	44.2595
	2	13	9	9.39381	8.37736	0.927856	4.73128	50.3659	49.6341									2	19	123	5.05136	4.19633	0.889246	3.15023	62.3639	37.6361									2	13	17	9.39046	8.05468	0.884588	4.16187	44.3202	44.3202
	2	4	110	6.80135	5.84124	0.913538	3.42504	50.3582	49.6418									2	15	88	7.43644	6.51956	0.924703	2.80814	37.762	37.762									2	8	6	8.9485	7.65622	0.886532	3.97635	44.4359	44.4359
	2	3	324	9.35167	7.83057	0.860675	4.64445	49.6644	49.6644									2	18	25	20.4908	17.5094	0.862119	7.73932	37.7697	37.7697									2	5	12	16.9177	14.9692	0.902263	9.39961	55.5606	44.4394
	2	11	10	8.29249	7.32888	0.929604	4.11924	49.6744	49.6744									2	13	28	15.0662	13.1837	0.906826	5.6999	37.8323	37.8323									2	15	32	10.691	9.26726	0.889841	5.93513	55.5154	44.4846
	2	10	291	7.63346	6.2251	0.86124	3.79361	49.6971	49.6971									2	5	6	4.98898	4.01596	0.847992	3.09283	61.9932	38.0068									2	7	249	8.98898	7.74058	0.893392	4.98885	55.4996	44.5004
	2	7	278	7.45915	6.52312	0.930203	3.74834	50.2515	49.7485									2	10	18	5.78109	4.7566	0.877764	2.19765	38.0145	38.0145									2	5	19	6.57494	5.6236	0.910991	3.63482	55.283	44.717
	2	7	4	8.51725	7.07605	0.870808	4.23791	49.7568	49.7568									2	1	57	4.59923	3.79947	0.889526	1.75532	38.1656	38.1656									2	12	13	12.4058	11.0253	0.921025	5.5482	44.7228	44.7228
	2	1	7	5.72112	4.88168	0.920198	2.87353	50.2267	49.7733									2	13	35	5.76426	4.91874	0.918866	3.56192	61.7932	38.2068									2	9	206	6.26091	5.2182	0.887205	3.46027	55.2679	44.7321
	2	9	5	9.75513	8.18153	0.846021	4.85723	49.7916	49.7916									2	13	38	7.71533	6.1488	0.848099	4.75669	61.6524	38.3476									2	14	22	5.81801	4.92408	0.898858	3.21439	55.2489	44.7511
	2	6	98	7.286	5.87685	0.83013	3.63606	49.9047	49.9047									2	14	362	11.6441	10.0947	0.915876	7.17677	61.6346	38.3654									2	10	255	6.01325	4.89011	0.834493	2.69116	44.7538	44.7538
	2	5	13	10.5036	9.11799	0.898851	5.26039	50.082	49.918									2	17	377	4.7942	4.02543	0.924666	1.8517	38.6237	38.6237									2	14	262	9.30127	7.8597	0.86826	5.1358	55.2161	44.7839
	2	9	11	7.83192	6.74421	0.904365	3.92184	50.0751	49.9249									2	8	11	8.22311	6.93572	0.875157	3.17823	38.6499	38.6499									2	7	187	7.99099	6.59334	0.843066	3.57961	44.7956	44.7956
	2	8	7	8.27218	7.12382	0.897672	4.14063	50.0549	49.9451									2	17	36	9.10732	8.06024	0.91811	3.52276	38.6805	38.6805									2	6	25	7.9573	6.63117	0.8644	3.56843	44.8447	44.8447
	2	4	99	9.23349	7.48532	0.840173	4.61218	49.9506	49.9506									2	5	44	6.98459	5.65523	0.845384	4.28131	61.2965	38.7035									2	10	30	6.67378	5.52059	0.875008	3.67978	55.1378	44.8622
	2	13	312	7.17228	6.13448	0.898058	3.5839	49.9688	49.9688									2	9	80	5.96397	5.2067	0.930731	2.31007	38.7338	38.7338									2	9	61	5.86714	5.01077	0.915466	2.63226	44.8646	44.8646
	3	1	4	6.44542	5.35966	0.875589		0	0									2	8	2	4.51017	3.87456	0.937287	1.74709	38.7366	38.7366									2	15	232	11.2314	9.62705	0.896077	6.19088	55.1214	44.8786
	3	2	48	4.58452	3.60384	0.867732		0	0									2	2	434	9.34222	7.69082	0.850094	5.72042	61.2319	38.7681									2	1	6	7.34988	6.24874	0.896911	4.04815	55.0778	44.9222
	3	2	89	5.79102	4.68487	0.859243		0	0									2	7	26	8.85289	7.71275	0.917161	5.41345	61.149	38.851									2	6	19	8.52437	7.26696	0.896281	4.6948	55.0751	44.9249
	3	2	104	5.56962	4.29387	0.818011		0	0									2	17	5	4.61874	4.00821	0.936852	2.82253	61.1102	38.8898									2	8	77	7.4022	6.21496	0.871056	4.07434	55.0422	44.9578
	3	4	25	5.32215	4.5154	0.909213		0	0									2	18	37	6.57047	5.59086	0.898536	2.55541	38.8923	38.8923									2	3	31	10.5124	9.02463	0.878486	5.78587	55.0386	44.9614
	3	6	1	6.26657	5.2788	0.897076		0	0									2	14	363	6.87118	5.73719	0.885189	4.19656	61.0748	38.9252									2	8	91	10.492	8.9472	0.854813	4.71984	44.985	44.985
	3	7	2	6.9617	5.89496	0.883606		0	0									2	15	81	4.85907	4.03619	0.90672	1.89316	38.9615	38.9615									2	6	39	9.62514	8.15853	0.859398	4.33064	44.993	44.993
	3	7	16	5.92231	4.86019	0.854051		0	0									2	15	41	5.34807	4.54838	0.909823	3.26221	60.9979	39.0021									2	15	35	5.8258	5.03539	0.924839	2.62254	45.016	45.016
	3	7	17	6.42412	5.42753	0.897507		0	0									2	2	43	7.56868	6.3161	0.881635	2.95225	39.0062	39.0062									2	6	52	5.82854	4.75071	0.878689	2.62682	45.0682	45.0682
	3	8	10	5.49666	4.54808	0.874386		0	0									2	13	83	6.71015	5.37164	0.825779	4.09243	60.9887	39.0113									2	12	222	10.7415	9.45785	0.913369	4.84199	45.0773	45.0773
	3	8	12	7.3314	6.10682	0.872865		0	0									2	1	73	10.6367	8.99574	0.86179	4.15434	39.0565	39.0565									2	5	20	7.20849	6.2455	0.91228	3.95673	54.8899	45.1101
	3	9	20	9.9093	8.24072	0.872062		0	0									2	2	45	10.5382	8.73198	0.839973	4.11668	39.0645	39.0645									2	6	53	9.64306	8.08718	0.859248	4.35115	45.1221	45.1221
	3	9	25	4.81836	4.05915	0.918197		0	0									2	18	32	7.25658	6.07262	0.888525	4.41653	60.8624	39.1376									2	3	24	7.51624	6.26064	0.877611	3.39308	45.1433	45.1433
	3	9	26	4.87198	4.15779	0.931117		0	0									2	3	16	8.53747	7.22074	0.866821	3.34215	39.1469	39.1469									2	1	18	7.71509	6.61097	0.903385	4.22855	54.8089	45.1911
	3	10	9	6.55725	5.55149	0.89531		0	0									2	9	27	4.83867	3.79524	0.83744	2.94393	60.8416	39.1584									2	9	42	7.68251	6.65173	0.90699	3.47586	45.2438	45.2438
	3	12	1	6.89308	5.84575	0.907888		0	0									2	15	30	9.02329	7.18919	0.821061	5.48146	60.7479	39.2521									2	14	5	6.76643	5.77286	0.910758	3.69838	54.6578	45.3422
	3	13	242	5.89701	5.05667	0.919723		0	0									2	19	394	12.1546	10.5435	0.894614	4.77365	39.2746	39.2746									2	11	9	5.27653	4.53058	0.92521	2.8839	54.6553	45.3447
	3	14	2	10.2596	8.6228	0.881388		0	0									2	3	23	5.93432	5.02216	0.888381	2.33168	39.2915	39.2915									2	13	225	4.9761	4.24857	0.928269	2.25988	45.4146	45.4146
	3	14	9	6.39475	5.39315	0.892967		0	0									2	5	78	7.22695	6.07631	0.870607	4.3783	60.583	39.417									2	8	60	8.08001	6.58066	0.832585	4.40726	54.5453	45.4547
	3	14	11	5.50811	4.71745	0.927317		0	0									2	9	85	8.57429	7.26524	0.915391	5.18682	60.4927	39.5073									2	13	3	4.95574	4.07841	0.886271	2.7007	54.4965	45.5035
	3	15	4	6.2965	5.29202	0.88172		0	0									2	14	5	9.59794	8.54665	0.9335	3.79346	39.5237	39.5237									2	14	26	7.28107	6.30661	0.907649	3.31315	45.5036	45.5036
	3	15	245	5.43537	4.59034	0.927433		0	0									2	15	83	13.1533	11.6795	0.91612	7.94656	60.415	39.585									2	8	31	6.91113	5.92176	0.893164	3.75881	54.3877	45.6123
	3	4	45	5.03275	4.06633	0.867801	4.54561	90.3205	9.6795									2	13	60	7.95935	6.43745	0.827958	3.15185	39.5993	39.5993									2	9	62	4.81059	4.05599	0.896097	2.19464	45.6211	45.6211
	3	2	91	5.23503	4.18277	0.854936	4.34812	83.0581	16.9419									2	9	57	6.67263	5.33488	0.830322	4.02347	60.2982	39.7018									2	14	9	8.86364	7.46351	0.882175	4.81713	54.3471	45.6529
	3	14	14	6.61	5.45417	0.881303	5.45213	82.483	17.517									2	4	92	7.33126	6.31336	0.900499	4.41331	60.1985	39.8015									2	7	246	10.3888	8.59301	0.845063	5.64483	54.3356	45.6644
	3	4	221	5.48336	4.62686	0.892578	0.970611	17.701	17.701									2	15	51	4.42453	3.61993	0.891851	2.66325	60.1929	39.8071									2	8	42	7.7374	6.53248	0.882871	3.53847	45.732	45.732
	3	2	12	5.92987	5.05854	0.904582	1.0964	18.4894	18.4894									2	18	33	8.03198	6.81663	0.88415	4.83352	60.1784	39.8216									2	8	86	6.7896	5.80412	0.908657	3.10604	45.7471	45.7471
	3	2	45	5.18158	4.17262	0.863914	4.22168	81.4748	18.5252									2	13	42	7.36928	6.06798	0.853786	2.93757	39.8624	39.8624									2	2	7	5.94217	4.9679	0.89178	2.72131	45.7965	45.7965
	3	8	20	5.58246	4.66827	0.900478	1.17647	21.0744	21.0744									2	17	25	6.91794	5.78906	0.919024	4.15586	60.0738	39.9262									2	1	19	9.60053	8.01646	0.863336	4.40397	45.8722	45.8722
	3	9	18	5.77324	4.86006	0.894107	4.5474	78.767	21.233									2	15	462	8.50055	6.89853	0.83396	5.10441	60.0479	39.9521									2	8	251	10.4246	8.62756	0.845013	5.64257	54.1276	45.8724
	3	5	222	5.69456	4.64736	0.869533	1.24681	21.8947	21.8947									2	6	2	5.21486	4.26621	0.87936	2.08383	39.9594	39.9594									2	9	16	6.54103	5.59419	0.881459	3.00058	45.8733	45.8733
	3	2	55	5.23181	4.0806	0.856689	4.07598	77.9078	22.0922									2	7	14	6.44631	5.58953	0.929404	2.58228	40.0583	40.0583									2	7	87	9.71264	8.19023	0.874698	5.25117	54.0653	45.9347
	3	5	227	5.73996	4.81626	0.906403	4.46538	77.7945	22.2055									2	11	80	6.45835	5.26408	0.869368	3.86755	59.8845	40.1155									2	7	69	5.98562	4.67546	0.832087	3.23471	54.0413	45.9587
	3	9	28	7.04876	6.16963	0.93465	5.42935	77.0255	22.9745									2	19	143	6.54769	5.37379	0.877735	2.6269	40.1195	40.1195									2	8	67	5.62383	4.65093	0.865002	2.58593	45.9816	45.9816
	3	4	42	6.01124	4.87415	0.844864	1.38662	23.0671	23.0671									2	11	349	3.91832	2.95068	0.816771	1.57271	40.1374	40.1374									2	4	17	14.6635	12.8519	0.896988	7.9154	53.9803	46.0197
	3	3	5	6.1061	5.25931	0.925639	4.6907	76.8199	23.1801									2	13	91	4.92144	4.02606	0.869334	2.94054	59.7497	40.2503									2	3	28	10.4875	8.88218	0.870056	5.66078	53.9766	46.0234
	3	2	147	5.43466	4.72457	0.928787	1.54042	28.3443	28.3443									2	5	324	6.20752	5.05667	0.850519	2.51007	40.4359	40.4359									2	8	50	7.6965	6.61845	0.896369	4.15089	53.9322	46.0678
	3	2	253	5.12939	4.15905	0.861864	3.59534	70.093	29.907									2	17	378	6.48923	5.46794	0.873287	2.63211	40.5613	40.5613									2	11	12	8.05918	7.0163	0.925551	3.71726	46.1246	46.1246
	3	4	50	5.67851	4.33401	0.815186	3.89533	68.5977	31.4023									2	3	19	6.60679	5.66195	0.915939	3.92566	59.4186	40.5814									2	14	24	8.12384	6.91395	0.893531	3.74926	46.1513	46.1513
	3	2	145	5.7552	4.61529	0.854645	3.92523	68.2033	31.7967									2	9	446	8.24548	6.88007	0.881664	3.34771	40.6005	40.6005									2	8	3	8.68414	7.36927	0.891925	4.67236	53.8033	46.1967
	3	2	125	4.54237	3.49289	0.838968	3.06327	67.4377	32.5623									2	19	16	8.07458	6.86118	0.902718	4.79609	59.3974	40.6026									2	12	22	7.29366	6.26848	0.903513	3.37102	46.2184	46.2184
	3	7	229	5.62486	4.53153	0.852988	3.75315	66.7243	33.2757									2	14	3	15.3127	13.5071	0.90782	6.22379	40.6446	40.6446									2	13	48	6.59719	5.71819	0.920007	3.05184	46.2597	46.2597
	3	2	132	5.15261	3.98421	0.824397	3.41405	66.2586	33.7414									2	9	12	5.66995	4.842	0.904594	2.31124	40.7629	40.7629									2	3	39	3.73547	2.95715	0.838662	2.00743	53.7397	46.2603
	3	6	49	11.4654	9.55317	0.854687	3.8822	33.8602	33.8602									2	1	295	9.83705	8.17606	0.853679	5.81856	59.1494	40.8506									2	2	238	5.60767	4.68344	0.907645	3.01024	53.6808	46.3192
	3	11	1	5.15909	4.41379	0.927762	1.7828	34.5565	34.5565									2	5	39	6.34095	5.14846	0.852359	3.75009	59.1408	40.8592									2	10	27	8.77767	7.20255	0.869473	4.06585	46.3204	46.3204
	3	10	20	9.05952	7.91588	0.89848	5.87814	64.8836	35.1164									2	18	390	10.4864	8.76613	0.849359	6.19893	59.1138	40.8862									2	7	58	7.89438	6.72199	0.895488	3.65795	46.3362	46.3362
	3	2	66	5.3052	4.32521	0.88324	3.4404	64.8495	35.1505									2	2	34	6.59354	5.56368	0.880104	3.89606	59.089	40.911									2	8	55	7.75012	6.37407	0.897768	4.15836	53.6554	46.3446
	3	4	23	5.92334	4.58578	0.819802	3.8276	64.6189	35.3811									2	18	381	7.72961	6.26364	0.83809	3.16313	40.9222	40.9222									2	8	129	8.05928	6.46796	0.831203	3.73704	46.3695	46.3695
	3	2	35	6.12653	5.17335	0.898639	3.95792	64.603	35.397									2	15	25	9.60768	7.64145	0.821802	3.9327	40.9329	40.9329									2	13	41	8.39954	7.2112	0.899477	4.49953	53.5687	46.4313
	3	8	1	5.83007	4.90262	0.895697	3.76497	64.5786	35.4214									2	15	19	6.378	4.94061	0.82312	2.61602	41.0162	41.0162									2	14	29	6.44956	5.39169	0.896459	2.99663	46.4626	46.4626
	3	4	4	4.88911	3.72894	0.817181	1.77479	36.3008	36.3008									2	1	105	9.1458	7.26905	0.815861	3.75309	41.0362	41.0362									2	4	54	5.7402	4.95061	0.925726	3.0725	53.5259	46.4741
	3	4	190	6.60997	5.49365	0.892975	4.20746	63.6533	36.3467									2	18	4	7.27528	5.99608	0.857055	4.28469	58.8937	41.1063									2	6	17	11.5469	9.83797	0.888525	5.36699	46.4797	46.4797
	3	2	254	6.51459	5.46866	0.887719	4.1319	63.4253	36.5747									2	11	105	7.50278	6.50509	0.916262	4.41351	58.825	41.175									2	8	16	7.45162	6.39899	0.901816	3.46763	46.5353	46.5353
	3	1	18	6.07815	5.0568	0.902751	2.22504	36.6072	36.6072									2	7	25	4.10669	3.48872	0.947916	2.4153	58.8139	41.1861									2	8	46	9.57522	7.98102	0.826444	5.1188	53.4588	46.5412
	3	9	14	6.392	5.30341	0.889094	2.39812	37.5175	37.5175									2	2	53	4.96171	4.09562	0.878917	2.05033	41.3231	41.3231									2	8	253	6.98618	5.83723	0.862618	3.73287	53.4322	46.5678
	3	2	103	5.81036	4.91153	0.917044	2.18431	37.5933	37.5933									2	7	331	9.10943	7.58861	0.838362	3.76972	41.3826	41.3826									2	6	36	9.11464	7.84341	0.897587	4.86581	53.3845	46.6155
	3	15	3	6.3574	5.63764	0.954455	2.42485	38.1421	38.1421									2	19	49	6.69769	5.77982	0.91413	2.77566	41.4421	41.4421									2	3	40	7.3765	6.14062	0.855	3.93772	53.382	46.618
	3	9	19	6.20966	5.28627	0.905262	3.8314	61.7007	38.2993									2	19	2	6.02449	5.18226	0.905557	2.4976	41.4575	41.4575									2	14	227	7.71257	6.41908	0.87216	3.59569	46.6211	46.6211
	3	2	114	4.2066	3.19242	0.847009	2.56592	60.9977	39.0023									2	11	421	8.20016	7.07638	0.896253	3.39959	41.4576	41.4576									2	9	9	7.30452	6.06447	0.88957	3.40927	46.6734	46.6734
	3	2	249	8.35291	6.84175	0.864391	3.25792	39.0034	39.0034									2	14	35	8.2179	7.108	0.908732	3.41237	41.5236	41.5236									2	15	45	8.02016	7.02081	0.917377	3.7452	46.6973	46.6973
	3	4	255	6.44825	5.14125	0.828117	3.92636	60.8903	39.1097									2	5	329	7.59106	6.11644	0.829131	4.43759	58.4581	41.5419									2	15	234	8.63946	7.12497	0.854727	4.60358	53.2855	46.7145
	3	5	225	6.00015	4.80474	0.865387	2.34926	39.1533	39.1533									2	13	353	7.1923	6.13631	0.916913	2.99012	41.5739	41.5739									2	12	14	6.11727	5.13592	0.897859	3.25826	53.2633	46.7367
	3	10	5	5.76674	4.95051	0.924036	2.26988	39.3615	39.3615									2	14	8	7.87347	6.8405	0.912409	4.59066	58.3054	41.6946									2	4	5	8.92861	7.76262	0.91349	4.75389	53.2433	46.7567
	3	10	233	6.14747	4.79398	0.800014	2.44248	39.7314	39.7314									2	14	21	5.76294	4.42249	0.808655	2.40411	41.7168	41.7168									2	3	175	16.3475	14.1146	0.879041	8.70366	53.2416	46.7584
	3	12	236	6.19264	5.16495	0.89988	3.72711	60.1862	39.8138									2	4	73	7.54717	6.39223	0.893959	3.15024	41.7406	41.7406									2	7	8	6.1618	5.11476	0.876065	3.28023	53.235	46.765
	3	3	4	7.00947	6.15987	0.926661	2.79596	39.8884	39.8884									2	11	103	11.1398	9.78546	0.905761	4.65149	41.7556	41.7556									2	10	217	6.598	5.45578	0.870915	3.08639	46.7776	46.7776
	3	14	17	6.04256	5.11583	0.916533	3.63155	60.0996	39.9004									2	19	5	10.8832	9.25094	0.88377	4.54798	41.789	41.789									2	9	69	9.14076	7.69582	0.864452	4.86441	53.2167	46.7833
	3	7	5	9.20103	7.84786	0.898249	5.52725	60.0721	39.9279									2	19	130	5.8277	4.59993	0.837457	3.38718	58.1221	41.8779									2	5	15	8.28907	7.14251	0.895719	4.40841	53.1834	46.8166
	3	8	5	6.01308	5.17064	0.92404	2.40635	40.0186	40.0186									2	1	133	8.59013	7.14988	0.866037	3.59877	41.8942	41.8942									2	4	16	7.73679	6.27851	0.848961	3.62327	46.8317	46.8317
	3	2	127	4.92424	3.95603	0.843773	1.98609	40.3329	40.3329									2	5	16	9.64291	8.21676	0.890589	5.6017	58.0914	41.9086									2	7	30	5.29215	4.06061	0.818012	2.8123	53.1409	46.8591
	3	13	11	6.98868	5.91053	0.89245	2.82792	40.4643	40.4643									2	2	300	7.80907	6.34847	0.837522	3.27315	41.9147	41.9147									2	3	171	11.2681	9.62303	0.867845	5.28128	46.8692	46.8692
	3	5	18	6.14603	5.18987	0.914005	2.50029	40.6814	40.6814									2	15	49	7.83828	6.28111	0.856218	3.28541	41.9149	41.9149									2	6	181	10.4181	8.54513	0.846943	4.88492	46.8887	46.8887
	3	1	5	6.03421	5.00197	0.875578	3.54698	58.7812	41.2188									2	14	39	6.12696	5.27813	0.917621	3.55544	58.0293	41.9707									2	10	210	10.534	9.00341	0.879576	5.5794	52.9655	47.0345
	3	4	81	8.09066	6.86495	0.889097	3.3349	41.2191	41.2191									2	19	409	5.87722	4.94423	0.886694	2.46937	42.016	42.016									2	15	23	6.96523	6.09798	0.928554	3.68386	52.8894	47.1106
	3	4	218	6.73009	5.57619	0.8754	3.95013	58.6936	41.3064									2	19	411	11.3347	9.48447	0.85927	4.76374	42.0278	42.0278									2	8	107	6.31442	5.45141	0.914937	3.33763	52.8573	47.1427
	3	5	21	6.42561	5.48508	0.907862	2.66638	41.4961	41.4961									2	9	83	6.39055	5.42925	0.904956	2.68627	42.0351	42.0351									2	12	29	4.8824	4.25463	0.93351	2.58039	52.8507	47.1493
	3	2	134	5.99381	4.74416	0.834435	2.49049	41.5511	41.5511									2	1	292	7.3461	6.1478	0.877954	3.09142	42.0825	42.0825									2	4	93	8.65695	7.41451	0.891872	4.57421	52.8386	47.1614
	3	6	2	8.36379	7.20262	0.89363	3.49622	41.8019	41.8019									2	11	107	5.1469	4.37403	0.91399	2.1687	42.1361	42.1361									2	15	76	5.29016	4.40006	0.891567	2.79288	52.7938	47.2062
	3	3	215	8.24223	6.70289	0.855148	3.45558	41.9253	41.9253									2	19	101	9.2069	7.68324	0.853103	3.88283	42.173	42.173									2	7	189	9.02643	7.37567	0.849641	4.26131	47.2093	47.2093
	3	2	113	5.5917	4.54151	0.865102	2.34733	41.9789	41.9789									2	2	436	7.16106	5.8814	0.848822	4.13897	57.7983	42.2017									2	4	24	8.3526	7.19346	0.901905	3.94472	47.2275	47.2275
	3	2	3	8.20794	6.86689	0.868768	3.45459	42.0884	42.0884									2	13	61	8.67033	7.06185	0.827425	5.00776	57.7574	42.2426									2	1	1	7.64376	6.59018	0.908804	3.61281	47.2648	47.2648
	3	12	15	5.74315	4.90918	0.922367	2.41987	42.1349	42.1349									2	16	373	10.1226	8.74131	0.900923	4.2763	42.245	42.245									2	15	16	8.52598	7.31965	0.904615	4.49574	52.7299	47.2701
	3	2	16	6.52858	5.52798	0.903316	3.76897	57.7302	42.2698									2	4	49	6.16968	4.88845	0.816449	2.61018	42.3066	42.3066									2	10	2	6.94863	5.84396	0.887417	3.28618	47.2925	47.2925
	3	8	15	5.17602	4.34492	0.904536	2.98266	57.6245	42.3755									2	5	26	13.8208	11.4854	0.841393	5.84765	42.3104	42.3104									2	1	25	6.35186	5.50789	0.922352	3.00641	47.3313	47.3313
	3	6	11	6.46186	5.44877	0.899716	2.74135	42.4235	42.4235									2	13	24	10.7906	9.15814	0.885905	4.57142	42.3651	42.3651									2	8	198	8.6038	7.26115	0.874628	4.52933	52.6433	47.3567
	3	2	146	7.81627	6.68067	0.899722	4.49796	57.5461	42.4539									2	19	47	6.72803	5.39339	0.828375	3.87612	57.6116	42.3884									2	13	40	4.62102	3.76709	0.882662	2.1889	47.3683	47.3683
	3	7	11	5.81941	5.09259	0.942506	3.34538	57.4866	42.5134									2	1	108	7.91835	6.59724	0.879259	3.3567	42.3913	42.3913									2	8	23	7.95121	6.76921	0.889582	4.18464	52.629	47.371
	3	5	224	7.15459	6.03784	0.902895	4.09904	57.2925	42.7075									2	17	17	5.16925	3.97057	0.813199	2.97655	57.5819	42.4181									2	15	15	4.86885	3.84395	0.840049	2.31028	47.4502	47.4502
	3	8	14	8.97188	8.00471	0.933172	5.12671	57.142	42.858									2	19	86	6.91181	5.62185	0.857022	3.97548	57.5173	42.4827									2	6	21	9.67286	8.09484	0.853623	5.08263	52.5452	47.4548
	3	4	1	8.44334	7.40618	0.908327	3.62433	42.9253	42.9253									2	18	34	5.44849	4.29429	0.830917	2.31681	42.5221	42.5221									2	13	1	8.60847	7.44208	0.896939	4.52268	52.5376	47.4624
	3	1	6	9.52822	8.12133	0.865824	5.4169	56.8511	43.1489									2	2	8	8.68679	7.45337	0.890401	4.98799	57.4204	42.5796									2	9	64	10.2284	8.58452	0.861829	5.37155	52.5161	47.4839
	3	4	29	6.93332	5.5322	0.828876	2.99601	43.2118	43.2118									2	7	31	4.96935	4.29212	0.934062	2.84893	57.3301	42.6699									2	8	203	9.36358	7.88152	0.881257	4.91342	52.4737	47.5263
	3	13	1	7.77623	6.73979	0.922532	3.36884	43.3223	43.3223									2	9	26	7.76016	6.6112	0.899426	4.44841	57.3236	42.6764									2	4	85	6.97827	5.82858	0.875888	3.66119	52.4656	47.5344
	3	6	37	5.59899	4.80577	0.920023	2.42763	43.3583	43.3583									2	4	82	9.06262	7.97576	0.923943	5.18866	57.2535	42.7465									2	2	166	9.53897	7.86665	0.85753	4.53544	47.5464	47.5464
	3	8	8	6.75411	5.88994	0.929942	3.82225	56.5915	43.4085									2	13	58	8.59444	7.00819	0.846713	4.91987	57.2448	42.7552									2	6	29	8.48709	7.45332	0.920808	4.44636	52.3897	47.6103
	3	4	14	9.71791	8.34159	0.898653	5.49316	56.5262	43.4738									2	14	31	8.98255	7.55966	0.864908	3.85158	42.8785	42.8785									2	8	118	7.03585	5.99298	0.901865	3.68567	52.3841	47.6159
	3	5	20	8.11861	7.02789	0.904612	3.54391	43.6517	43.6517									2	8	10	5.96441	5.02588	0.892868	3.40472	57.0839	42.9161									2	3	43	5.80316	4.65351	0.849534	2.76391	47.6277	47.6277
	3	4	41	8.34424	7.07242	0.894017	3.64344	43.6641	43.6641									2	19	470	16.0471	13.6689	0.89128	6.88737	42.9197	42.9197									2	8	80	5.67247	4.72147	0.89151	2.70738	47.7284	47.7284
	3	3	21	9.98429	8.55853	0.880369	5.62053	56.2937	43.7063									2	15	26	5.83363	4.73093	0.853693	2.50463	42.9344	42.9344									2	3	42	6.14561	5.06408	0.87424	3.21118	52.2516	47.7484
	3	1	206	7.36151	6.23645	0.905861	3.22197	43.7678	43.7678									2	13	23	8.42277	6.65746	0.796166	3.62173	42.9993	42.9993									2	8	82	5.50219	4.6418	0.901412	2.87432	52.2396	47.7604
	3	3	214	11.2796	9.89649	0.891898	4.94055	43.8006	43.8006									2	19	37	7.87153	6.36088	0.842297	3.38877	43.051	43.051									2	4	64	7.44428	6.39949	0.902209	3.55542	47.7605	47.7605
	3	9	13	9.33794	8.09231	0.895138	4.09217	43.8231	43.8231									2	13	27	5.1213	4.25099	0.88744	2.91571	56.9331	43.0669									2	10	26	3.99655	3.22943	0.872378	2.08646	52.2065	47.7935
	3	10	8	9.21647	7.65504	0.880924	4.04024	43.8371	43.8371									2	11	57	8.15835	6.66224	0.863813	3.51749	43.1152	43.1152									2	1	11	7.08376	6.26259	0.935733	3.69706	52.1906	47.8094
	3	7	15	7.78457	6.75819	0.918762	4.37104	56.15	43.85									2	19	61	8.0229	6.82717	0.889981	4.55938	56.8296	43.1704									2	11	15	6.73455	5.73227	0.898744	3.51479	52.1904	47.8096
	3	9	17	6.18691	5.27491	0.918908	3.47256	56.1275	43.8725									2	5	326	6.64161	5.49006	0.865462	3.77357	56.8171	43.1829									2	4	44	5.29548	4.52257	0.907255	2.76266	52.1701	47.8299
	3	1	205	7.25992	6.27944	0.927975	3.19332	43.9857	43.9857									2	13	68	7.35949	5.90242	0.831707	3.1781	43.1837	43.1837									2	11	1	6.65255	5.61826	0.898697	3.46753	52.1233	47.8767
	3	7	18	5.7747	5.04657	0.943844	3.23459	56.0132	43.9868									2	19	108	16.2949	13.8336	0.869308	9.25608	56.8034	43.1966									2	2	20	5.86599	4.90683	0.881838	2.80889	47.8844	47.8844
	3	5	4	7.40035	6.33917	0.907179	3.2583	44.0289	44.0289									2	10	31	5.34158	4.22366	0.858019	2.3076	43.2007	43.2007									2	12	15	9.88772	8.57584	0.89591	5.14764	52.0609	47.9391
	3	6	36	7.99733	6.83667	0.893067	4.47185	55.9168	44.0832									2	14	14	9.5771	8.38494	0.906152	5.43525	56.7526	43.2474									2	8	135	7.26797	6.08844	0.896694	3.48634	47.9686	47.9686
	3	1	10	6.51565	5.5372	0.906082	3.64114	55.883	44.117									2	15	21	6.01048	4.68298	0.824757	3.40627	56.6722	43.3278									2	4	59	11.1163	9.33696	0.870632	5.33282	47.9731	47.9731
	3	2	141	7.75426	6.28887	0.861086	3.42545	44.1751	44.1751									2	10	28	9.72595	8.03535	0.850631	5.50963	56.6488	43.3512									2	2	32	6.33792	5.40587	0.902677	3.29525	51.9927	48.0073
	3	5	6	8.89148	7.69806	0.918619	3.92964	44.1956	44.1956									2	9	51	7.69997	6.56799	0.897893	4.35941	56.616	43.384									2	1	13	7.91111	6.78105	0.889726	3.80321	48.0744	48.0744
	3	8	22	10.6047	9.3551	0.92057	4.69795	44.3007	44.3007									2	18	469	7.36777	6.14855	0.864048	3.20598	43.5136	43.5136									2	4	25	6.3234	5.07693	0.853733	3.27771	51.8346	48.1654
	3	2	88	5.82862	4.69333	0.850758	2.58458	44.3429	44.3429									2	11	104	8.24787	7.15269	0.9135	3.59105	43.5391	43.5391									2	15	56	5.7737	4.81401	0.894282	2.9916	51.8142	48.1858
	3	2	62	5.99128	4.7595	0.83386	2.65805	44.3653	44.3653									2	8	5	11.6289	10.1317	0.903566	6.56481	56.4526	43.5474									2	4	32	7.58058	6.12256	0.835094	3.65861	48.2629	48.2629
	3	2	7	6.3462	5.25706	0.876977	2.81617	44.3757	44.3757									2	7	6	6.72328	5.42035	0.845326	3.79525	56.4494	43.5506									2	10	40	9.22511	7.57152	0.837852	4.77048	51.7119	48.2881
	3	5	228	9.71588	8.43236	0.908766	5.40162	55.5958	44.4042									2	18	388	7.85033	6.37578	0.845875	3.42432	43.6201	43.6201									2	8	28	9.67647	8.29285	0.878774	4.67398	48.3025	48.3025
	3	7	4	11.1012	9.61978	0.894113	4.94265	44.5234	44.5234									2	9	336	6.84265	5.84288	0.891729	2.98477	43.6201	43.6201									2	10	213	8.56698	7.22915	0.884698	4.14041	48.3299	48.3299
	3	11	5	10.4353	9.09139	0.897149	4.64691	44.5308	44.5308									2	9	16	9.80104	8.3337	0.887557	5.52527	56.3743	43.6257									2	7	3	7.62386	6.44153	0.881412	3.93726	51.6439	48.3561
	3	1	17	8.35574	7.08257	0.881506	3.72185	44.5424	44.5424									2	14	7	7.77453	6.59291	0.894325	4.38251	56.3701	43.6299									2	15	2	10.3328	8.9779	0.892395	5.33187	51.6011	48.3989
	3	10	13	10.0402	8.66928	0.879585	4.47394	44.5602	44.5602									2	2	72	10.4667	8.9211	0.862199	5.89624	56.3335	43.6665									2	6	9	8.93769	7.72112	0.890331	4.32631	48.4052	48.4052
	3	2	212	7.18392	5.82898	0.853527	3.98093	55.4145	44.5855									2	19	109	9.7892	8.0747	0.860543	5.51315	56.3187	43.6813									2	2	157	9.79539	8.20475	0.863839	4.74613	48.4527	48.4527
	3	9	6	7.02393	6.16534	0.930158	3.89084	55.3941	44.6059									2	1	88	8.10978	6.4793	0.815119	4.56726	56.3179	43.6821									2	4	84	5.8844	5.00601	0.90886	3.03322	51.5469	48.4531
	3	14	18	7.8746	6.78634	0.923735	4.36039	55.3729	44.6271									2	1	288	9.33904	7.71049	0.839949	4.08386	43.7289	43.7289									2	5	14	6.8203	5.97835	0.935676	3.51491	51.536	48.464
	3	11	10	8.95637	7.76745	0.916335	4.95759	55.3527	44.6473									2	19	406	5.87455	4.98851	0.909536	2.57086	43.7626	43.7626									2	15	39	6.96391	5.9537	0.908781	3.58886	51.5351	48.4649
	3	7	12	6.37761	5.1355	0.845566	2.84805	44.657	44.657									2	16	13	6.87616	5.80768	0.893758	3.01133	43.7937	43.7937									2	6	48	9.82601	8.52597	0.920654	4.76294	48.4728	48.4728
	3	6	5	6.96899	6.03246	0.913714	3.85615	55.333	44.667									2	15	89	5.43393	4.71278	0.929502	3.0489	56.1086	43.8914									2	2	163	7.64489	6.13675	0.834691	3.70602	48.477	48.477
	3	8	6	7.57832	6.51946	0.911293	4.19024	55.2924	44.7076									2	10	454	7.67815	6.42831	0.878493	3.3704	43.8959	43.8959									2	2	237	5.19086	4.20241	0.845021	2.51931	48.5336	48.5336
	3	6	4	5.44859	4.63682	0.925538	3.00967	55.2376	44.7624									2	11	21	6.07358	4.89672	0.834642	3.40551	56.0709	43.9291									2	9	49	7.54856	6.56954	0.914756	3.88221	51.4298	48.5702
	3	14	1	6.02525	4.98708	0.884043	2.70246	44.8523	44.8523									2	10	8	9.02815	7.76809	0.910896	3.97113	43.986	43.986									2	4	20	7.55365	6.5573	0.930924	3.88347	51.4119	48.5881
	3	9	232	5.63595	4.57237	0.833017	3.10689	55.1263	44.8737									2	19	104	7.80396	6.71026	0.90558	3.43277	43.9875	43.9875									2	12	27	5.35444	4.54241	0.925461	2.60234	48.6017	48.6017
	3	2	252	8.57067	7.07525	0.854157	4.72379	55.1158	44.8842									2	19	113	8.74726	7.5099	0.896042	3.84815	43.9927	43.9927									2	4	178	11.4845	9.95776	0.882957	5.58411	48.6229	48.6229
	3	2	119	6.20099	4.96808	0.85748	2.78689	44.9427	44.9427									2	2	432	11.0385	9.42061	0.883752	4.85671	43.998	43.998									2	8	43	6.96749	5.83313	0.904576	3.57762	51.3473	48.6527
	3	2	152	6.25278	5.05392	0.840115	3.43928	55.0041	44.9959									2	5	47	9.56595	8.12778	0.896943	5.35302	55.9591	44.0409									2	15	51	8.09597	7.02495	0.889385	3.94349	48.7093	48.7093
	3	4	75	5.68682	4.68599	0.870428	2.56006	45.0173	45.0173									2	11	92	7.54688	6.07385	0.831959	4.22042	55.9227	44.0773									2	6	3	6.38711	5.47434	0.912589	3.11131	48.7124	48.7124
	3	12	3	6.87965	6.0377	0.933574	3.09735	45.0219	45.0219									2	12	10	6.58345	5.84439	0.942137	2.90548	44.133	44.133									2	8	59	6.68243	5.73924	0.910115	3.25599	48.7246	48.7246
	3	5	7	7.92965	6.49281	0.873585	3.57211	45.0475	45.0475									2	19	26	6.0918	5.0849	0.881328	2.68995	44.1569	44.1569									2	13	2	5.82308	4.97872	0.909684	2.83882	48.7511	48.7511
	3	12	237	6.49391	5.43746	0.88253	3.56721	54.9317	45.0683									2	19	28	7.70333	6.53369	0.887804	4.30177	55.843	44.157									2	2	39	11.0001	9.13376	0.828993	5.36304	48.7543	48.7543
	3	9	10	6.41091	5.37297	0.885271	2.89229	45.1151	45.1151									2	19	35	6.38321	5.0301	0.828185	3.55739	55.7305	44.2695									2	14	23	7.31773	6.2944	0.904582	3.74989	51.2439	48.7561
	3	1	11	8.25204	7.27421	0.933791	3.72313	45.1176	45.1176									2	1	126	5.58207	4.62398	0.875221	2.47202	44.285	44.285									2	8	76	7.93764	6.82812	0.90158	4.0669	51.2356	48.7644
	3	4	47	6.49727	5.2262	0.823249	3.56377	54.8503	45.1497									2	13	460	8.15134	6.81663	0.882384	4.53867	55.68	44.32									2	3	12	9.03899	7.66824	0.874426	4.41112	48.801	48.801
	3	10	16	9.12563	7.85395	0.90728	5.00438	54.8388	45.1612									2	9	3	6.74486	5.71097	0.888698	3.75518	55.6747	44.3253									2	8	117	7.1001	6.08935	0.910624	3.47068	48.8821	48.8821
	3	9	21	8.03026	6.9579	0.915737	3.62822	45.1819	45.1819									2	5	319	8.10683	6.77673	0.868163	4.51123	55.6473	44.3527									2	9	63	5.81191	4.85602	0.882652	2.84297	48.9163	48.9163
	3	15	7	7.11237	6.02788	0.895001	3.21632	45.2215	45.2215									2	15	53	8.48814	6.89366	0.841221	4.72302	55.6426	44.3574									2	5	243	14.3207	12.5089	0.887521	7.00847	48.9395	48.9395
	3	10	1	9.07511	7.82075	0.89996	4.96967	54.7616	45.2384									2	4	438	9.55831	8.08873	0.8905	4.24213	44.3816	44.3816									2	4	116	6.97293	5.75759	0.856876	3.55965	51.0495	48.9505
	3	5	14	10.8393	9.27693	0.880346	5.93551	54.7592	45.2408									2	15	72	8.37901	6.63404	0.828997	3.71907	44.3855	44.3855									2	3	36	7.24035	6.12088	0.89371	3.69603	51.0477	48.9523
	3	5	19	8.75093	7.60481	0.914481	3.96563	45.3166	45.3166									2	9	76	6.492	5.04453	0.825704	3.60919	55.5945	44.4055									2	8	105	8.22319	6.96125	0.893987	4.19627	51.0297	48.9703
	3	2	153	6.66583	5.27814	0.837355	3.64373	54.6628	45.3372									2	19	110	5.74538	4.82113	0.892141	2.55608	44.4894	44.4894									2	7	6	7.26012	5.86594	0.867358	3.55625	48.9834	48.9834
	3	3	15	7.89664	6.79709	0.904758	4.31534	54.6477	45.3523									2	9	74	8.73545	7.28916	0.864179	4.84394	55.4516	44.5484									2	12	12	6.03463	5.32088	0.952333	3.07721	50.9926	49.0074
	3	12	14	9.21953	8.11559	0.918141	5.03809	54.6458	45.3542									2	10	21	6.74713	5.79952	0.919071	3.74139	55.4515	44.5485									2	7	40	7.75664	6.36956	0.844534	3.95467	50.9843	49.0157
	3	3	6	10.9583	9.77027	0.9453	4.9729	45.3801	45.3801									2	13	22	15.2332	12.3274	0.821452	6.78763	44.5581	44.5581									2	6	12	7.59651	6.45324	0.880292	3.72396	49.022	49.022
	3	2	208	6.10586	4.98767	0.866426	2.77308	45.4167	45.4167									2	2	75	9.58062	8.06154	0.865781	5.309	55.414	44.586									2	11	259	7.49458	6.55855	0.909537	3.67552	49.0423	49.0423
	3	4	217	8.17344	6.87998	0.866263	3.71265	45.4233	45.4233									2	15	55	10.8248	9.17849	0.869545	5.99382	55.3714	44.6286									2	3	75	10.4482	8.82771	0.878961	5.31754	50.8946	49.1054
	3	5	9	6.20099	5.29584	0.928473	3.38312	54.5577	45.4423									2	8	6	6.07082	5.03131	0.882486	3.36118	55.3662	44.6338									2	15	67	5.99321	5.20307	0.913003	2.94742	49.1794	49.1794
	3	2	246	7.66221	6.23058	0.855514	4.17801	54.5276	45.4724									2	10	346	9.09027	7.6197	0.855838	5.0325	55.3614	44.6386									2	8	88	6.30729	5.00082	0.832657	3.10298	49.1967	49.1967
	3	12	13	6.21858	5.28513	0.908037	2.82919	45.4957	45.4957									2	10	13	8.36036	6.74845	0.838036	3.7326	44.6464	44.6464									2	3	58	8.72712	7.41486	0.884286	4.29532	49.2181	49.2181
	3	1	13	10.3019	8.8925	0.880395	5.61194	54.4746	45.5254									2	14	2	9.73324	8.50469	0.924566	5.38555	55.3315	44.6685									2	14	2	7.79551	6.7247	0.904603	3.95576	50.7441	49.2559
	3	6	3	8.5506	7.3667	0.912219	4.64851	54.3647	45.6353									2	5	9	4.76254	3.90237	0.889245	2.63279	55.2812	44.7188									2	14	13	9.47671	7.64593	0.831276	4.67491	49.3305	49.3305
	3	1	2	9.34283	7.90786	0.87394	5.07911	54.3637	45.6363									2	19	29	6.62178	5.52914	0.873616	3.66019	55.275	44.725									2	3	6	6.57446	5.46015	0.87687	3.33002	50.6508	49.3492
	3	4	256	7.68386	6.08051	0.827303	4.17082	54.2803	45.7197									2	17	22	5.5613	4.71274	0.913222	2.4876	44.7305	44.7305									2	15	18	9.77944	8.22328	0.864595	4.95168	50.6336	49.3664
	3	4	220	7.57124	6.40305	0.89247	4.10701	54.2448	45.7552									2	11	68	6.0099	5.00198	0.903516	3.32021	55.2456	44.7544									2	2	45	6.83297	5.78797	0.887842	3.45976	50.6333	49.3667
	3	5	17	6.80853	5.9091	0.92681	3.69125	54.215	45.785									2	2	159	4.58237	3.61128	0.832902	2.05229	44.7866	44.7866									2	10	10	7.10052	6.02099	0.888592	3.59499	50.6299	49.3701
	3	1	16	9.80269	8.47735	0.886971	4.49008	45.8045	45.8045									2	18	12	5.91645	4.82727	0.861193	2.64997	44.7899	44.7899									2	15	52	7.49901	6.01243	0.833457	3.70723	49.4362	49.4362
	3	14	16	8.02666	7.05355	0.930725	3.67679	45.8072	45.8072									2	14	32	9.50074	8.21853	0.899132	4.25583	44.7947	44.7947									2	3	41	8.32171	7.02362	0.864303	4.20755	50.5611	49.4389
	3	2	69	5.8976	5.00595	0.901608	2.70372	45.8443	45.8443									2	5	1	7.36671	6.16131	0.8763	3.31207	44.9599	44.9599									2	4	88	7.20561	6.27293	0.904554	3.64151	50.5371	49.4629
	3	15	5	11.1922	9.54259	0.878615	6.05883	54.1346	45.8654									2	14	1	7.36589	6.43418	0.919723	3.31228	44.9677	44.9677									2	3	7	8.87344	7.60019	0.880357	4.38966	49.4696	49.4696
	3	10	234	7.89921	6.60031	0.89201	4.27541	54.1245	45.8755									2	1	297	8.18368	6.7421	0.848168	4.50274	55.0209	44.9791									2	4	13	6.15148	5.20013	0.899333	3.04339	49.474	49.474
	3	4	49	9.03399	7.73619	0.893749	4.88649	54.0901	45.9099									2	17	3	28.4383	25.7182	0.918282	15.6409	54.9995	45.0005									2	13	18	9.87406	8.49414	0.894892	4.98874	50.5237	49.4763
	3	7	7	11.0992	9.58954	0.872283	5.09723	45.9245	45.9245									2	4	80	6.48129	5.58516	0.912118	2.91987	45.0508	45.0508									2	10	8	9.21513	7.8306	0.867193	4.56437	49.5313	49.5313
	3	4	36	7.5033	6.03564	0.853723	4.0564	54.0615	45.9385									2	9	343	8.4162	6.70515	0.83533	3.79318	45.07	45.07									2	3	82	9.25867	7.83853	0.885801	4.59122	49.5883	49.5883
	3	3	177	10.7666	9.06001	0.853167	5.81809	54.0383	45.9617									2	11	97	9.23036	7.52712	0.822203	4.16466	45.1191	45.1191									2	9	2	8.98538	7.82254	0.909345	4.46058	49.6426	49.6426
	3	15	11	8.37398	7.44974	0.944185	3.85434	46.0276	46.0276									2	9	337	6.47091	5.47385	0.897739	3.54841	54.8364	45.1636									2	13	29	6.39999	5.58837	0.935416	3.17743	49.6474	49.6474
	3	2	176	6.69729	5.33093	0.83017	3.08541	46.0695	46.0695									2	11	111	7.25703	6.1504	0.88636	3.27992	45.1964	45.1964									2	4	63	6.98125	5.67905	0.869387	3.5148	50.3463	49.6537
	3	8	2	9.86994	8.71146	0.905074	4.54978	46.0974	46.0974									2	19	106	5.07098	4.01051	0.842412	2.29491	45.2558	45.2558									2	3	19	9.99056	8.47334	0.858292	5.0266	50.3135	49.6865
	3	9	22	11.6508	9.76457	0.828552	6.27197	53.8328	46.1672									2	19	401	6.9289	5.98984	0.91274	3.13929	45.3073	45.3073									2	7	35	6.93837	5.94796	0.905445	3.48659	50.2508	49.7492
	3	1	3	8.08842	6.9939	0.906651	4.35135	53.7973	46.2027									2	19	112	6.45627	5.50666	0.906269	3.5307	54.6864	45.3136									2	4	86	8.53504	6.9151	0.837106	4.24665	49.7555	49.7555
	3	2	140	7.87714	6.47487	0.849952	4.23685	53.7867	46.2133									2	11	110	8.21914	6.99895	0.885238	3.72945	45.3751	45.3751									2	7	2	8.1267	7.02253	0.906997	4.08102	50.2174	49.7826
	3	10	18	12.549	10.9973	0.921264	6.74184	53.7241	46.2759									2	18	382	5.81665	4.91305	0.885313	3.17689	54.6171	45.3829									2	8	98	7.26507	6.18184	0.882988	3.61722	49.7892	49.7892
	3	12	8	7.9589	6.54311	0.878573	3.68579	46.3103	46.3103									2	19	18	5.16865	4.25453	0.879877	2.34864	45.44	45.44									2	6	43	7.69003	6.5514	0.906166	3.86042	50.2003	49.7997
	3	2	97	9.17837	7.94099	0.879717	4.25117	46.3173	46.3173									2	10	10	8.54553	7.24955	0.88353	3.89139	45.5371	45.5371									2	4	35	5.68427	4.49384	0.840049	2.83178	49.8178	49.8178
	3	15	12	9.20307	8.04335	0.913887	4.26318	46.3235	46.3235									2	16	14	6.17421	5.34426	0.925678	3.36022	54.4235	45.5765									2	7	191	5.749	4.81251	0.898094	2.88308	50.1493	49.8507
	3	13	6	9.48064	8.24822	0.91308	4.3929	46.3355	46.3355									2	4	24	7.06598	5.89089	0.864822	3.84458	54.4097	45.5903									2	15	34	6.28605	5.28909	0.88278	3.14967	50.1058	49.8942
	3	3	18	9.51745	8.28894	0.91152	5.10415	53.6294	46.3706									2	7	5	9.05566	7.9127	0.915733	4.92342	54.3684	45.6316									2	7	36	8.15558	6.86607	0.877451	4.08491	50.0874	49.9126
	3	11	9	6.00169	4.94576	0.884299	2.78626	46.4245	46.4245									2	10	16	8.07681	6.70807	0.859255	3.68748	45.6552	45.6552									2	13	13	8.41325	7.13934	0.889155	4.21324	50.0786	49.9214
	3	2	158	8.53477	7.08272	0.86462	3.96285	46.4318	46.4318									2	18	21	6.97328	5.8509	0.881409	3.78875	54.3323	45.6677									2	8	84	7.05919	5.70003	0.832679	3.52412	49.9224	49.9224
	3	4	37	9.23129	7.8462	0.87608	4.94453	53.5627	46.4373									2	19	405	7.78087	6.37267	0.864623	3.55734	45.719	45.719									2	14	12	10.6266	9.06043	0.862868	5.31045	49.9734	49.9734
	3	1	8	7.9933	6.89516	0.884564	3.71414	46.4657	46.4657									2	15	69	4.40496	3.38491	0.849219	2.01401	45.7215	45.7215									2	10	18	6.33151	5.34604	0.886105	3.16584	50.0014	49.9986
	3	11	8	9.81196	8.94872	0.931765	5.2513	53.5194	46.4806									2	9	338	7.64396	6.32126	0.872361	4.14822	54.268	45.732									3	1	1	13.2302	11.3028	0.869125		0	0
	3	11	4	5.13694	4.46301	0.949331	2.39142	46.5534	46.5534									2	13	76	7.46172	6.26048	0.890487	4.04912	54.2653	45.7347									3	1	9	9.77079	8.39687	0.894356		0	0
	3	2	76	6.2053	5.13219	0.87363	3.31544	53.4292	46.5708									2	10	9	7.36625	6.15745	0.887198	3.36934	45.7402	45.7402									3	1	17	6.87228	5.94349	0.920809		0	0
	3	6	48	10.4593	9.03517	0.891914	5.58735	53.4201	46.5799									2	17	14	6.91837	5.93865	0.914709	3.16497	45.7473	45.7473									3	1	20	5.09476	4.15109	0.881642		0	0
	3	13	12	8.22942	7.14055	0.912464	4.39311	53.383	46.617									2	15	461	10.7515	8.90058	0.851384	4.91959	45.7573	45.7573									3	1	37	11.8609	9.95492	0.855905		0	0
	3	2	27	11.2796	9.70506	0.898871	6.01952	53.3665	46.6335									2	10	17	8.5537	6.96342	0.839638	3.9156	45.7767	45.7767									3	1	38	8.60443	7.41721	0.890872		0	0
	3	2	133	8.54493	7.37986	0.905974	3.98927	46.6858	46.6858									2	15	79	5.37203	4.61861	0.916141	2.4614	45.8188	45.8188									3	1	133	8.25823	6.79474	0.845068		0	0
	3	9	33	6.59182	5.72399	0.912823	3.07824	46.6979	46.6979									2	2	20	10.9277	9.20214	0.871381	5.91618	54.1391	45.8609									3	2	4	5.66583	4.98748	0.939987		0	0
	3	7	8	9.20848	7.83251	0.898581	4.31088	46.8142	46.8142									2	17	16	6.85115	5.66926	0.83856	3.14653	45.9271	45.9271									3	2	7	8.2753	7.27938	0.926396		0	0
	3	15	1	16.465	14.6294	0.900454	7.71974	46.8857	46.8857									2	15	465	16.3704	13.6487	0.845072	7.53006	45.9979	45.9979									3	2	19	5.82574	5.18758	0.950755		0	0
	3	9	8	5.67308	4.82127	0.917098	3.0125	53.1016	46.8984									2	1	109	8.29204	6.88209	0.861043	3.81668	46.0283	46.0283									3	2	187	4.46043	3.83337	0.931605		0	0
	3	3	20	11.9844	10.2831	0.880563	5.62171	46.9086	46.9086									2	19	76	7.33204	6.31504	0.906362	3.95707	53.9696	46.0304									3	3	10	8.10553	6.98132	0.897913		0	0
	3	7	1	6.71391	5.77729	0.919209	3.15099	46.9323	46.9323									2	19	127	8.74498	7.57711	0.894866	4.02721	46.0517	46.0517									3	3	31	5.48567	4.51851	0.881641		0	0
	3	8	11	7.8838	6.79466	0.916068	4.18373	53.0674	46.9326									2	10	453	8.97816	7.40445	0.845141	4.13641	46.072	46.072									3	3	35	6.84226	5.99943	0.924054		0	0
	3	5	223	6.75865	5.5403	0.842907	3.17294	46.9463	46.9463									2	5	43	8.44683	7.01484	0.860928	3.89239	46.0811	46.0811									3	3	140	16.8738	14.3804	0.884521		0	0
	3	5	15	6.2578	5.40639	0.915807	2.93846	46.9567	46.9567									2	5	322	8.62491	6.98542	0.837167	4.64695	53.8782	46.1218									3	3	143	12.0177	10.4021	0.903293		0	0
	3	14	13	10.8076	9.46293	0.914122	5.07595	46.9666	46.9666									2	9	7	7.11523	5.75695	0.833437	3.28205	46.1271	46.1271									3	4	145	6.52535	5.51697	0.884542		0	0
	3	2	210	6.53568	5.08201	0.810318	3.06975	46.9691	46.9691									2	3	3	9.1075	7.43979	0.840827	4.906	53.8677	46.1323									3	5	12	6.31213	5.59503	0.946979		0	0
	3	12	10	7.30734	6.41784	0.931744	3.43298	46.9799	46.9799									2	18	380	6.12097	4.88714	0.840051	3.29594	53.8468	46.1532									3	6	8	5.25516	4.10152	0.83534		0	0
	3	7	19	8.09042	6.91164	0.898281	3.80629	47.0468	47.0468									2	18	386	8.72552	7.29863	0.870171	4.69657	53.8256	46.1744									3	6	12	12.1977	10.9943	0.931416		0	0
	3	10	15	11.1332	9.42095	0.885568	5.23986	47.0653	47.0653									2	13	43	5.78259	4.79858	0.884601	3.11177	53.8127	46.1873									3	6	18	7.91725	6.68825	0.889009		0	0
	3	2	9	6.80482	5.80191	0.899255	3.59912	52.8908	47.1092									2	7	12	5.74505	4.74317	0.89348	2.65378	46.1924	46.1924									3	7	12	5.43492	4.60561	0.892208		0	0
	3	2	213	6.33031	5.29067	0.890919	2.99086	47.2466	47.2466									2	19	269	7.17396	5.94043	0.877215	3.31624	46.2261	46.2261									3	7	155	11.7192	9.55785	0.822815		0	0
	3	10	19	9.0003	7.80451	0.908742	4.25254	47.2489	47.2489									2	6	8	7.31981	6.13407	0.87753	3.93351	53.7379	46.2621									3	8	1	6.10463	4.96474	0.863419		0	0
	3	5	13	7.62482	6.73582	0.945663	3.60283	47.2513	47.2513									2	14	19	11.6214	9.74791	0.857571	5.37759	46.2731	46.2731									3	8	8	12.0125	10.6513	0.922918		0	0
	3	12	22	7.11349	6.27497	0.940791	3.3617	47.2581	47.2581									2	19	68	10.2625	8.88772	0.902413	5.51372	53.7269	46.2731									3	8	157	7.50422	6.27448	0.88146		0	0
	3	15	13	9.84978	8.63309	0.91489	5.19277	52.7196	47.2804									2	14	25	6.35099	5.39165	0.898132	3.41188	53.722	46.278									3	9	1	7.67609	6.44144	0.900969		0	0
	3	2	139	9.15129	7.71767	0.872051	4.816	52.6265	47.3735									2	11	49	12.1201	9.85609	0.828358	5.60988	46.2857	46.2857									3	9	5	7.44958	6.41549	0.918734		0	0
	3	2	20	7.57215	6.36859	0.882469	3.58764	47.3794	47.3794									2	2	36	7.50093	6.37859	0.894467	4.0278	53.6973	46.3027									3	9	10	9.87016	8.37146	0.897681		0	0
	3	12	16	8.20554	6.83727	0.875235	4.31711	52.6121	47.3879									2	19	6	9.74596	8.42755	0.888523	4.51276	46.3038	46.3038									3	9	11	7.64158	6.5994	0.904263		0	0
	3	12	21	7.90914	6.80887	0.903568	4.1609	52.6087	47.3913									2	10	32	7.64317	6.56125	0.902301	3.53927	46.3063	46.3063									3	9	14	5.83038	4.99631	0.926466		0	0
	3	2	32	8.75722	7.27922	0.851251	4.60525	52.588	47.412									2	15	23	8.09592	6.93845	0.906015	4.34378	53.654	46.346									3	10	8	8.14892	6.73298	0.862772		0	0
	3	3	12	9.37637	7.63731	0.83756	4.45008	47.4606	47.4606									2	17	30	2.35549	1.78572	0.853388	1.26305	53.6214	46.3786									3	10	12	4.98085	4.11088	0.880739		0	0
	3	9	16	7.09981	6.14542	0.92677	3.72984	52.5345	47.4655									2	13	82	7.31817	6.0477	0.868437	3.92331	53.6106	46.3894									3	10	14	7.70232	6.3112	0.848932		0	0
	3	14	15	7.45132	6.45895	0.911625	3.5443	47.566	47.566									2	15	29	9.13178	7.49801	0.8398	4.89232	53.5747	46.4253									3	10	38	2.71222	2.13796	0.87644		0	0
	3	12	238	7.5473	6.1121	0.830815	3.95385	52.3876	47.6124									2	13	360	8.46565	7.26842	0.893704	4.53433	53.5615	46.4385									3	10	45	6.77871	5.41942	0.830773		0	0
	3	9	2	8.424	7.09277	0.871984	4.01289	47.6364	47.6364									2	5	318	8.9939	7.53793	0.883526	4.81527	53.5393	46.4607									3	10	115	6.21506	5.21351	0.873215		0	0
	3	8	4	7.97206	6.76968	0.886992	4.16734	52.2743	47.7257									2	15	48	10.068	7.99344	0.815919	5.38635	53.4998	46.5002									3	10	160	5.30546	4.19563	0.833138		0	0
	3	12	2	8.69726	7.67531	0.910677	4.15259	47.7459	47.7459									2	8	3	9.96176	9.03862	0.953174	4.63396	46.5175	46.5175									3	10	170	11.471	9.40939	0.844212		0	0
	3	9	7	5.59004	4.77415	0.929376	2.67169	47.7938	47.7938									2	19	87	6.87956	5.92504	0.916188	3.6783	53.467	46.533									3	11	2	5.92751	5.0688	0.912842		0	0
	3	8	7	7.38175	6.41185	0.920772	3.8522	52.1854	47.8146									2	15	85	4.46524	3.70286	0.900997	2.07878	46.5546	46.5546									3	11	4	5.66126	4.97265	0.943588		0	0
	3	2	108	7.42634	6.18276	0.85741	3.87442	52.1713	47.8287									2	5	68	6.33423	5.27653	0.885888	2.95001	46.5725	46.5725									3	12	3	4.1778	3.41268	0.8906		0	0
	3	4	219	6.73041	5.57519	0.852063	3.51073	52.1622	47.8378									2	9	32	9.36397	7.9468	0.882782	5.00155	53.4127	46.5873									3	12	5	5.94678	5.17292	0.931683		0	0
	3	10	2	6.39686	5.37156	0.900548	3.06112	47.8535	47.8535									2	13	416	11.9107	9.92179	0.845172	5.55227	46.6159	46.6159									3	12	15	13.8832	12.0286	0.898788		0	0
	3	7	3	7.55142	6.4864	0.91006	3.61481	47.8693	47.8693									2	11	51	5.62253	4.76857	0.902322	2.62326	46.6562	46.6562									3	13	6	4.32703	3.63614	0.913096		0	0
	3	6	16	7.6076	6.5743	0.915001	3.96382	52.1034	47.8966									2	13	65	15.4053	12.8129	0.847635	8.21744	53.3416	46.6584									3	14	1	7.9934	6.99998	0.923305		0	0
	3	9	11	9.01673	7.6711	0.887172	4.69593	52.0802	47.9198									2	18	379	9.01285	7.5208	0.857227	4.20765	46.6851	46.6851									3	14	3	6.39829	5.57886	0.932573		0	0
	3	2	38	9.64438	8.0519	0.862033	5.02243	52.0763	47.9237									2	7	7	11.676	10.4597	0.91388	6.21602	53.2376	46.7624									3	14	8	5.62674	4.91226	0.94962		0	0
	3	10	7	8.51426	6.94447	0.86128	4.08375	47.9637	47.9637									2	7	28	10.0806	8.83692	0.902409	5.3655	53.2258	46.7742									3	14	14	5.67411	4.9504	0.931133		0	0
	3	1	7	8.25094	6.74135	0.847953	3.95897	47.9821	47.9821									2	18	22	7.12988	5.81836	0.849308	3.7932	53.2014	46.7986									3	14	178	7.05236	5.82623	0.819637		0	0
	3	13	8	7.46627	6.44406	0.909973	3.88324	52.0104	47.9896									2	5	56	9.22943	7.70117	0.855457	4.90816	53.1794	46.8206									3	14	182	4.33768	3.59093	0.910688		0	0
	3	2	36	7.57801	5.98095	0.806534	3.94126	52.0092	47.9908									2	19	65	13.5462	11.2967	0.877301	6.34249	46.8212	46.8212									3	16	2	7.94914	6.87395	0.910365		0	0
	3	3	9	9.94042	8.35665	0.884552	4.77057	47.9916	47.9916									2	1	42	4.84413	3.86873	0.85442	2.576	53.1778	46.8222									3	16	3	10.0209	8.39745	0.869347		0	0
	3	9	29	8.42932	7.34034	0.914385	4.38215	51.987	48.013									2	8	7	7.27135	6.37056	0.938035	3.40482	46.8251	46.8251									3	16	8	5.48194	4.61034	0.891274		0	0
	3	9	15	8.02756	6.87453	0.91456	3.85487	48.0204	48.0204									2	4	81	5.54229	4.57719	0.884403	2.94684	53.1701	46.8299									3	16	183	3.76658	3.05539	0.889213		0	0
	3	8	19	5.18912	4.25506	0.880552	2.69666	51.9676	48.0324									2	9	333	14.0522	12.1436	0.862312	6.58515	46.8619	46.8619									3	17	5	5.70328	4.87447	0.909918		0	0
	3	13	239	6.93161	5.93031	0.898427	3.33074	48.0514	48.0514									2	19	102	5.75353	4.89352	0.902822	3.05706	53.1337	46.8663									3	17	6	4.82485	4.03368	0.903624		0	0
	3	9	1	8.48588	7.2714	0.900739	4.40722	51.936	48.064									2	12	6	7.68099	6.93652	0.950315	4.07971	53.1144	46.8856									3	17	7	5.77893	4.84587	0.895434		0	0
	3	2	92	5.32806	4.54518	0.906188	2.56126	48.0711	48.0711									2	19	111	9.57049	8.30105	0.890038	5.0821	53.1018	46.8982									3	17	10	6.83044	5.65101	0.88535		0	0
	3	12	11	8.02499	6.88303	0.910146	3.8591	48.0886	48.0886									2	13	72	6.44557	5.04847	0.866458	3.0236	46.9097	46.9097									3	17	25	11.0147	9.70148	0.9171		0	0
	3	10	17	7.30669	6.50445	0.955005	3.51433	48.0974	48.0974									2	9	335	8.5932	7.40414	0.897727	4.03142	46.9141	46.9141									3	17	27	6.77727	5.72038	0.89146		0	0
	3	3	3	12.9928	11.3628	0.89086	6.253	48.1266	48.1266									2	13	357	14.2651	12.3045	0.886935	6.69715	46.9479	46.9479									3	1	7	7.66427	6.47829	0.879864	7.24822	94.5715	5.42854
	3	7	230	7.13737	6.026	0.897315	3.43705	48.1557	48.1557									2	1	298	7.07667	5.78809	0.846886	3.75381	53.0449	46.9551									3	2	137	5.3764	4.59035	0.914208	4.94155	91.9117	8.08829
	3	15	244	9.65754	8.12332	0.884928	4.65066	48.1557	48.1557									2	5	313	11.5008	9.82113	0.884107	5.401	46.9621	46.9621									3	4	146	5.75567	4.77412	0.895312	0.524837	9.11861	9.11861
	3	4	44	8.22136	7.08101	0.898102	3.95927	48.1583	48.1583									2	13	55	5.34446	4.45923	0.909334	2.51234	47.0082	47.0082									3	1	22	4.40369	3.39827	0.823384	3.98403	90.4703	9.5297
	3	14	19	12.2077	10.217	0.863152	6.32698	51.8277	48.1723									2	17	20	8.93878	7.74853	0.893939	4.20309	47.0208	47.0208									3	9	16	6.02422	5.17713	0.927729	0.655413	10.8796	10.8796
	3	2	209	7.66491	6.42802	0.869387	3.69539	48.2119	48.2119									2	13	96	5.34708	4.33679	0.86248	2.83007	52.9273	47.0727									3	14	177	8.80506	7.37785	0.848383	0.997749	11.3315	11.3315
	3	14	5	9.14099	7.65051	0.909867	4.40754	48.2173	48.2173									2	1	47	7.83921	6.30867	0.838466	4.14719	52.9031	47.0969									3	3	5	5.9769	4.83691	0.833028	5.26342	88.0627	11.9373
	3	7	9	7.69647	6.53532	0.907648	3.71243	48.2354	48.2354									2	16	1	8.7974	7.65673	0.92438	4.65295	52.89	47.11									3	17	9	15.6496	14.1097	0.934478	13.766	87.9635	12.0365
	3	11	7	7.17635	6.29953	0.933293	3.46222	48.2448	48.2448									2	5	8	8.40086	6.86255	0.833558	3.95929	47.1296	47.1296									3	17	193	12.056	10.8136	0.929852	10.5586	87.5796	12.4204
	3	9	5	11.481	9.96346	0.900722	5.54024	48.2557	48.2557									2	19	8	8.40489	7.17471	0.889984	4.4425	52.8561	47.1439									3	4	150	8.00548	6.58199	0.845124	6.98902	87.303	12.697
	3	15	6	9.70911	8.43863	0.897039	4.68581	48.262	48.262									2	4	69	5.73191	4.78687	0.892826	2.70386	47.172	47.172									3	10	164	5.92939	4.68009	0.827417	5.17338	87.2499	12.7501
	3	8	13	7.33247	6.23108	0.903351	3.54088	48.2905	48.2905									2	9	342	9.19881	7.95687	0.890761	4.85814	52.8127	47.1873									3	12	11	5.62641	4.8787	0.936166	4.88838	86.8826	13.1174
	3	3	216	7.1094	5.78808	0.821502	3.43369	48.2979	48.2979									2	5	81	10.528	8.98222	0.879364	5.55826	52.7948	47.2052									3	16	13	6.08174	5.22583	0.915253	5.23647	86.1015	13.8985
	3	15	9	8.55436	7.57606	0.936338	4.13169	48.2992	48.2992									2	17	4	10.1528	8.37957	0.877379	4.79463	47.2249	47.2249									3	17	3	5.06636	4.36687	0.924513	0.709254	13.9993	13.9993
	3	1	12	6.10141	5.15887	0.906507	3.15435	51.6986	48.3014									2	15	369	6.74998	5.51568	0.831318	3.56157	52.7642	47.2358									3	13	8	6.29243	5.6044	0.956976	5.37118	85.3594	14.6406
	3	3	2	6.98747	5.91693	0.88708	3.61218	51.6951	48.3049									2	13	70	6.16965	4.92635	0.850929	3.25265	52.7202	47.2798									3	1	2	23.099	20.0722	0.885511	19.6249	84.9603	15.0397
	3	12	20	10.8222	9.3484	0.886859	5.2308	48.334	48.334									2	5	46	8.47268	7.08702	0.844632	4.46539	52.7034	47.2966									3	10	105	14.0608	11.8843	0.882161	2.23614	15.9034	15.9034
	3	10	6	11.2108	9.93811	0.915244	5.41908	48.3379	48.3379									2	19	34	5.88507	4.82006	0.87386	3.10102	52.693	47.307									3	10	113	5.66305	4.5098	0.838522	0.915062	16.1585	16.1585
	3	2	8	5.38159	4.30355	0.843507	2.77918	51.6425	48.3575									2	16	17	7.46676	6.58105	0.928132	3.53642	47.3622	47.3622									3	4	10	23.4232	20.1455	0.869295	19.6057	83.7019	16.2981
	3	2	44	6.99984	5.55038	0.82604	3.61402	51.63	48.37									2	2	61	14.805	12.8102	0.878327	7.01762	47.4004	47.4004									3	10	116	7.762	6.36444	0.858793	6.48715	83.5757	16.4243
	3	4	80	9.41228	7.9394	0.885127	4.55616	48.4066	48.4066									2	19	39	9.36892	8.05537	0.893733	4.44227	47.415	47.415									3	8	4	6.97354	5.84741	0.888474	5.79807	83.1438	16.8562
	3	13	241	7.90694	6.59964	0.881229	4.07936	51.5922	48.4078									2	1	131	6.76015	5.57334	0.873044	3.20591	47.4237	47.4237									3	1	24	4.3934	3.65331	0.901122	3.61826	82.3567	17.6433
	3	5	1	5.34873	4.60441	0.934257	2.75952	51.5921	48.4079									2	11	347	25.234	22.4357	0.909821	13.2562	52.5329	47.4671									3	1	4	5.15442	4.29357	0.87174	0.948657	18.4047	18.4047
	3	8	3	8.42023	7.33525	0.920398	4.07675	48.4161	48.4161									2	15	63	6.59809	5.20257	0.84583	3.46314	52.4871	47.5129									3	15	13	26.0704	23.0331	0.86045	5.10212	19.5705	19.5705
	3	2	115	7.24511	5.90271	0.846338	3.73696	51.5791	48.4209									2	3	306	10.0768	8.47985	0.884688	4.78814	47.5166	47.5166									3	11	6	6.14651	5.34215	0.92677	4.93001	80.2083	19.7917
	3	13	9	5.15111	4.06256	0.823835	2.49645	48.4642	48.4642									2	6	5	8.43341	7.28366	0.910834	4.01092	47.5598	47.5598									3	1	135	5.29953	4.33135	0.864638	1.05787	19.9615	19.9615
	3	9	23	7.74003	6.46918	0.881837	3.98847	51.5303	48.4697									2	5	22	9.33499	7.59809	0.85094	4.44306	47.5957	47.5957									3	15	2	9.28104	7.61427	0.833835	1.92444	20.7352	20.7352
	3	5	16	8.01951	6.95654	0.918484	3.88785	48.4799	48.4799									2	15	86	8.60933	7.39655	0.907973	4.50948	52.379	47.621									3	16	192	7.45147	6.34942	0.920815	1.60243	21.5048	21.5048
	3	4	46	10.8935	9.18232	0.859531	5.61014	51.4997	48.5003									2	19	413	11.5415	9.6676	0.874779	5.49922	47.6474	47.6474									3	15	3	6.39133	5.44682	0.908395	4.98477	77.9927	22.0073
	3	4	11	8.02838	6.45057	0.822308	4.13311	51.4813	48.5187									2	1	290	10.0383	8.15806	0.842002	5.25315	52.3313	47.6687									3	2	18	6.38894	5.43072	0.907552	1.46274	22.895	22.895
	3	10	258	8.0233	6.62754	0.842161	3.89493	48.5452	48.5452									2	6	7	7.69679	6.27429	0.814738	3.66948	47.6754	47.6754									3	16	4	6.40101	5.56299	0.919878	1.48857	23.2552	23.2552
	3	2	25	6.48348	5.23365	0.8455	3.1489	48.5681	48.5681									2	1	98	7.69601	6.20424	0.82598	3.66927	47.6775	47.6775									3	9	12	7.53159	6.27312	0.894511	5.74677	76.3022	23.6978
	3	2	5	5.35354	4.26531	0.832416	2.6014	48.5922	48.5922									2	13	414	6.5849	5.3482	0.852393	3.44527	52.3208	47.6792									3	1	35	9.09327	7.77797	0.884826	2.19202	24.1059	24.1059
	3	8	17	6.93872	5.99565	0.927341	3.37593	48.6534	48.6534									2	4	309	6.58123	5.72282	0.914158	3.44208	52.3015	47.6985									3	6	153	6.63334	5.29575	0.840449	5.00648	75.4745	24.5255
	3	2	247	10.133	8.53976	0.856216	4.93089	48.6617	48.6617									2	19	70	9.32075	7.9607	0.87853	4.87217	52.2723	47.7277									3	14	7	3.62065	3.08161	0.954608	0.889327	24.5626	24.5626
	3	11	3	10.0038	8.40016	0.868837	5.13209	51.3015	48.6985									2	19	117	8.65274	6.92334	0.843175	4.13377	47.7741	47.7741									3	4	1	7.11663	5.98124	0.859686	5.3653	75.391	24.609
	3	2	150	8.46887	7.32085	0.90414	4.3404	51.2512	48.7488									2	11	456	5.69102	4.50452	0.838778	2.72001	47.7948	47.7948									3	3	4	8.64475	6.99464	0.809756	6.48993	75.0736	24.9264
	3	2	116	7.67724	6.27972	0.859086	3.74556	48.7879	48.7879									2	15	467	9.55038	8.11572	0.874724	4.56961	47.8474	47.8474									3	10	165	4.34523	3.50599	0.872277	1.09619	25.2275	25.2275
	3	2	21	5.74973	4.57917	0.834848	2.80655	48.8118	48.8118									2	15	50	5.3349	4.31975	0.881042	2.55318	47.8581	47.8581									3	3	14	6.45443	5.30822	0.85974	1.64365	25.4654	25.4654
	3	9	12	7.49818	6.21638	0.871383	3.66212	48.8401	48.8401									2	11	6	7.97826	6.40489	0.820532	3.81985	47.8782	47.8782									3	10	46	5.8117	4.64456	0.834019	1.48449	25.5432	25.5432
	3	10	14	5.42235	4.6772	0.942106	2.7733	51.1456	48.8544									2	9	91	8.2178	7.13471	0.907417	4.28108	52.0952	47.9048									3	9	159	6.75657	5.85389	0.946678	5.02661	74.396	25.604
	3	12	12	10.2284	8.67657	0.868792	5.22852	51.1176	48.8824									2	9	450	6.08863	4.98272	0.88203	2.92135	47.9804	47.9804									3	3	21	7.02162	6.07196	0.919749	1.83098	26.0763	26.0763
	3	2	63	7.52233	6.19314	0.859662	3.67727	48.8848	48.8848									2	18	44	8.88764	7.40254	0.85832	4.26576	47.9965	47.9965									3	10	166	7.7716	6.55508	0.885885	2.02707	26.083	26.083
	3	2	251	8.68351	7.23693	0.873866	4.24727	48.9119	48.9119									2	16	9	19.2233	17.3361	0.914773	9.228	48.0041	48.0041									3	1	136	9.69868	8.36331	0.892104	7.14763	73.697	26.303
	3	3	19	6.72874	5.76888	0.908153	3.43716	51.0818	48.9182									2	19	88	5.92278	4.8212	0.854814	3.07951	51.9944	48.0056									3	3	7	10.1528	8.464	0.872426	7.45746	73.4523	26.5477
	3	1	15	9.09281	8.09534	0.928278	4.44856	48.9239	48.9239									2	17	375	8.81358	7.54203	0.880989	4.58166	51.9841	48.0159									3	10	168	6.43513	5.24269	0.844054	1.73346	26.9375	26.9375
	3	2	86	8.16979	6.87838	0.880106	4.17073	51.0507	48.9493									2	15	466	7.69873	6.40814	0.85702	3.6984	48.0391	48.0391									3	13	7	9.05257	7.86572	0.910247	6.58585	72.7512	27.2488
	3	4	33	7.82957	6.37472	0.858551	3.83461	48.976	48.976									2	1	125	12.1269	10.2826	0.865562	5.83325	48.1018	48.1018									3	15	11	6.00003	5.08079	0.908987	1.63549	27.258	27.258
	3	15	10	6.93026	5.81514	0.888636	3.39493	48.987	48.987									2	15	7	6.04533	5.16968	0.912431	2.90877	48.116	48.116									3	16	12	6.52379	5.54855	0.910633	4.73943	72.6484	27.3516
	3	2	207	7.23304	5.81476	0.831301	3.54325	48.987	48.987									2	15	10	6.49872	5.43369	0.895742	3.12723	48.1207	48.1207									3	10	161	8.16719	6.98969	0.890953	2.23709	27.3911	27.3911
	3	12	235	7.219	6.188	0.904489	3.68254	51.0117	48.9883									2	11	87	7.5126	6.4419	0.894263	3.61941	48.1779	48.1779									3	11	3	8.96576	7.69869	0.911269	2.51601	28.0624	28.0624
	3	14	3	9.7202	8.52427	0.921358	4.95782	51.0053	48.9947									2	5	73	9.23569	7.77524	0.879947	4.78575	51.818	48.182									3	5	3	6.7893	5.93857	0.945722	4.87692	71.8324	28.1676
	3	11	2	11.201	9.76815	0.893649	5.71308	51.0052	48.9948									2	19	398	9.17998	7.54476	0.869856	4.75072	51.7508	48.2492									3	6	15	4.95997	4.22864	0.917648	1.40643	28.3556	28.3556
	3	9	231	7.12153	5.89025	0.840028	3.48993	49.0053	49.0053									2	9	41	8.80732	7.51469	0.876219	4.55777	51.7498	48.2502									3	14	181	13.7013	11.3126	0.822033	9.79218	71.469	28.531
	3	15	14	7.50954	6.48221	0.904826	3.82243	50.9009	49.0991									2	14	34	8.07606	6.84736	0.897396	4.17535	51.7003	48.2997									3	4	4	7.1224	6.06704	0.910582	2.04105	28.6568	28.6568
	3	4	12	6.32957	4.99162	0.824976	3.10865	49.1131	49.1131									2	15	2	7.96768	6.74553	0.891066	3.84841	48.3002	48.3002									3	10	163	11.661	9.79134	0.868939	8.28229	71.0256	28.9744
	3	6	35	8.27022	7.20244	0.914177	4.06259	49.1231	49.1231									2	17	10	8.35073	7.08375	0.893073	4.31462	51.6675	48.3325									3	3	33	5.68572	4.83928	0.910415	1.65651	29.1345	29.1345
	3	12	4	8.30503	6.80598	0.879849	4.08412	49.1765	49.1765									2	11	91	18.7569	16.0527	0.86853	9.68938	51.6576	48.3424									3	2	15	5.69081	4.84322	0.91977	1.6716	29.3737	29.3737
	3	8	21	6.07904	5.38383	0.953756	3.08935	50.8197	49.1803									2	18	29	7.59238	6.4198	0.885495	3.92108	51.6449	48.3551									3	3	190	6.48322	5.80316	0.94767	1.91679	29.5654	29.5654
	3	2	137	7.1562	5.64412	0.812439	3.63648	50.8157	49.1843									2	2	63	9.19117	7.86133	0.882819	4.73819	51.5515	48.4485									3	10	1	7.6975	6.52369	0.87492	5.40375	70.2013	29.7987
	3	14	4	8.22457	7.05404	0.909687	4.17844	50.8043	49.1957									2	5	314	9.1212	7.55049	0.85194	4.70052	51.534	48.466									3	1	18	5.47859	4.56751	0.882293	1.63415	29.8278	29.8278
	3	13	2	7.29166	6.30023	0.906623	3.58735	49.198	49.198									2	5	32	10.4877	8.83499	0.868256	5.0868	48.5024	48.5024									3	11	10	8.72395	7.90764	0.960907	2.60352	29.8434	29.8434
	3	3	17	9.51394	8.26309	0.898397	4.6827	49.2193	49.2193									2	2	33	5.84778	4.63943	0.828567	2.83689	48.5122	48.5122									3	6	5	7.27334	6.33803	0.93467	5.08608	69.9277	30.0723
	3	9	30	10.7624	9.38882	0.893442	5.46408	50.7703	49.2297									2	5	75	8.93462	7.50057	0.877807	4.5973	51.4549	48.5451									3	10	118	5.76702	4.70584	0.852056	4.02405	69.7769	30.2231
	3	13	243	8.16549	7.08801	0.90351	4.02097	49.2435	49.2435									2	13	21	4.85455	3.86991	0.847095	2.4965	51.4259	48.5741									3	8	21	7.55663	6.66977	0.936546	2.28452	30.2319	30.2319
	3	2	107	8.68771	7.43993	0.888744	4.27945	49.2587	49.2587									2	12	2	5.31627	4.50365	0.916341	2.73344	51.4165	48.5835									3	17	184	12.0488	10.4961	0.906537	3.64664	30.2655	30.2655
	3	2	29	6.10356	5.18555	0.919159	3.09572	50.7199	49.2801									2	11	47	8.66128	7.16464	0.842251	4.20941	48.6003	48.6003									3	9	17	6.48841	5.68396	0.931912	2.00723	30.9356	30.9356
	3	4	58	12.3044	11.0901	0.926598	6.23612	50.682	49.318									2	9	21	6.71451	5.31526	0.856667	3.45032	51.386	48.614									3	2	8	10.2427	8.93892	0.9231	3.18016	31.0481	31.0481
	3	13	240	8.77813	7.34837	0.870911	4.44852	50.6774	49.3226									2	3	1	6.66607	5.61671	0.899944	3.24228	48.6385	48.6385									3	9	13	4.31517	3.61912	0.925908	1.33991	31.051	31.051
	3	9	24	7.11482	6.09694	0.908234	3.60395	50.6542	49.3458									2	15	40	8.28415	7.18802	0.923789	4.25314	51.3408	48.6592									3	12	173	11.8025	10.3407	0.888969	3.70552	31.3959	31.3959
	3	9	3	6.35297	5.61423	0.946353	3.21694	50.6368	49.3632									2	2	10	8.19099	6.91331	0.882029	4.20505	51.3375	48.6625									3	6	1	5.16274	4.41926	0.901158	1.62766	31.5271	31.5271
	3	2	250	6.31332	5.1688	0.846942	3.1932	50.5789	49.4211									2	13	85	7.51394	6.10267	0.828983	3.85506	51.3055	48.6945									3	17	19	9.84834	8.40871	0.892015	3.1116	31.5952	31.5952
	3	2	95	8.22672	7.00361	0.899466	4.15778	50.54	49.46									2	16	371	5.94674	4.8724	0.845247	3.04978	51.2848	48.7152									3	5	6	8.18357	7.04056	0.874166	5.5915	68.3259	31.6741
	3	7	13	9.00877	7.72996	0.878211	4.5502	50.5086	49.4914									2	11	422	7.04005	6.11862	0.924081	3.60879	51.2609	48.7391									3	11	5	5.54422	4.79231	0.937185	1.77957	32.0978	32.0978
	3	9	32	5.44224	4.60291	0.892781	2.69449	49.5106	49.5106									2	1	291	8.65858	7.26883	0.856257	4.22073	48.7462	48.7462									3	7	5	3.15647	2.55729	0.906482	2.13898	67.7649	32.2351
	3	10	10	12.7534	11.3736	0.922022	6.31831	49.5421	49.5421									2	13	2	7.79112	6.76816	0.907008	3.79802	48.7481	48.7481									3	2	17	8.61626	7.51712	0.911732	5.83835	67.7596	32.2404
	3	2	47	8.88914	7.57014	0.884306	4.48145	50.4148	49.5852									2	19	51	9.3808	8.10774	0.888786	4.80564	51.2285	48.7715									3	3	12	5.81664	4.94612	0.913747	1.88565	32.4182	32.4182
	3	14	12	11.0698	9.47018	0.878762	5.49319	49.6233	49.6233									2	13	77	5.50877	4.35421	0.8389	2.82161	51.2204	48.7796									3	17	4	10.5859	9.22989	0.906763	7.14897	67.5326	32.4674
	3	2	106	5.89854	4.86837	0.886589	2.97144	50.3759	49.6241									2	1	33	8.87003	7.2832	0.854822	4.33328	48.853	48.853									3	17	16	6.86513	5.70744	0.866352	2.29237	33.3914	33.3914
	3	7	6	8.57369	7.615	0.934959	4.31784	50.3615	49.6385									2	19	45	8.42686	7.30908	0.906745	4.30781	51.1199	48.8801									3	6	13	7.56189	6.33915	0.873804	5.02808	66.4924	33.5076
	3	12	259	10.4892	8.95092	0.878666	5.28131	50.3501	49.6499									2	2	18	8.19499	6.88826	0.874357	4.00612	48.8849	48.8849									3	1	11	6.62454	5.59362	0.906929	4.39383	66.3265	33.6735
	3	2	211	7.68871	6.3169	0.858421	3.81793	49.6564	49.6564									2	15	38	8.09197	6.78563	0.867807	3.95669	48.8964	48.8964									3	3	142	5.50341	4.50968	0.869826	3.64325	66.1999	33.8001
	3	6	6	9.43635	8.13441	0.885842	4.68756	49.6756	49.6756									2	3	12	8.60139	7.58036	0.932563	4.21407	48.9929	48.9929									3	3	32	7.0985	6.24222	0.937436	2.40945	33.943	33.943
	3	2	173	9.89031	8.42733	0.880987	4.91502	49.6953	49.6953									2	13	90	5.86728	4.72058	0.862423	2.99255	51.004	48.996									3	10	63	8.87276	7.64915	0.885033	3.01475	33.9776	33.9776
	3	5	226	9.13312	7.60175	0.863009	4.59314	50.291	49.709									2	10	14	8.01185	7.03613	0.914571	4.08599	50.9993	49.0007									3	8	11	11.7274	10.5831	0.932179	4.09432	34.9125	34.9125
	3	2	248	9.35186	7.89683	0.892995	4.70264	50.2856	49.7144									2	5	4	9.04998	7.64915	0.874917	4.60957	50.9346	49.0654									3	10	59	11.1636	9.12133	0.833281	7.25355	64.9749	35.0251
	3	4	40	7.77308	6.39799	0.84445	3.90833	50.2803	49.7197									2	4	88	7.12158	6.14806	0.903923	3.62708	50.9309	49.0691									3	16	9	7.49832	6.54013	0.920879	2.62932	35.0655	35.0655
	3	4	21	7.41127	6.01443	0.837703	3.68488	49.72	49.72									2	9	28	5.96451	4.70253	0.836212	2.92686	49.0713	49.0713									3	1	12	7.56322	6.46111	0.888781	4.90731	64.8839	35.1161
	3	11	6	6.68429	5.57227	0.893695	3.35865	50.2468	49.7532									2	17	15	6.36186	5.04822	0.822616	3.12261	49.0833	49.0833									3	5	8	7.78962	6.65893	0.913137	4.96421	63.7285	36.2715
	3	2	1	10.4273	9.02847	0.894369	5.18891	49.7627	49.7627									2	7	15	9.87193	8.65669	0.909463	5.02447	50.8966	49.1034									3	13	175	7.49935	6.48336	0.91008	2.72256	36.3039	36.3039
	3	7	257	9.28708	7.79132	0.87073	4.66435	50.2241	49.7759									2	19	90	4.92716	4.01621	0.855375	2.41954	49.1061	49.1061									3	2	11	6.52434	5.74532	0.921286	2.36942	36.3166	36.3166
	3	14	6	7.71598	6.38948	0.883212	3.84082	49.7775	49.7775									2	5	66	7.45934	6.38074	0.894614	3.79548	50.8823	49.1177									3	3	36	10.4201	9.08805	0.910944	6.6007	63.3461	36.6539
	3	2	68	8.01604	6.3241	0.81148	3.99048	49.7812	49.7812									2	2	431	12.5071	10.5344	0.882787	6.36072	50.8569	49.1431									3	5	10	8.76699	7.7081	0.917892	3.22068	36.7365	36.7365
	3	4	71	7.68681	6.28998	0.838701	3.827	49.7866	49.7866									2	13	75	8.22422	6.99123	0.890213	4.04211	49.1489	49.1489									3	3	24	5.80084	4.91474	0.906257	2.13227	36.758	36.758
	3	6	34	12.8502	11.0148	0.86381	6.40163	49.8174	49.8174									2	3	307	9.11924	7.77957	0.892857	4.48262	49.1556	49.1556									3	11	9	10.5225	9.07176	0.907272	6.61857	62.8989	37.1011
	3	2	174	4.9096	3.84844	0.839179	2.46252	50.1572	49.8428									2	19	48	6.79971	5.81941	0.905184	3.34302	49.1641	49.1641									3	4	14	7.17516	6.16868	0.897408	4.51131	62.874	37.126
	3	14	7	9.46722	8.12243	0.921361	4.72643	49.9241	49.9241									2	1	68	9.9739	8.25904	0.855362	5.07	50.8326	49.1674									3	15	1	4.92463	4.00065	0.874823	3.0814	62.5712	37.4288
	3	14	8	7.24588	5.74948	0.832813	3.62843	50.0758	49.9242									2	10	11	7.43857	5.775	0.804353	3.65797	49.1758	49.1758									3	10	42	7.57389	6.41763	0.892248	2.83692	37.4565	37.4565
	3	2	15	8.43447	7.10245	0.882724	4.22341	50.0733	49.9267									2	11	93	8.4817	6.89847	0.825439	4.1733	49.2036	49.2036									3	8	15	9.12784	8.03209	0.921064	3.43206	37.5999	37.5999
	3	4	39	9.52373	7.78286	0.823852	4.76843	50.0689	49.9311									2	6	3	9.39612	8.17774	0.906668	4.62734	49.2474	49.2474									3	13	13	8.51819	7.45747	0.920781	5.3041	62.2679	37.7321
																		2	2	68	8.97871	7.36421	0.839411	4.55481	50.7289	49.2711									3	10	31	7.26955	5.77205	0.826398	2.75314	37.8721	37.8721
																		2	5	2	5.54539	4.40517	0.83825	2.81114	50.6933	49.3067									3	12	12	7.20586	5.71242	0.839932	4.46954	62.0265	37.9735
																		2	9	93	10.6185	9.14639	0.885567	5.23671	49.3168	49.3168									3	3	15	8.14362	7.1553	0.924317	3.1033	38.1071	38.1071
																		2	1	25	8.79575	7.21605	0.830176	4.33824	49.322	49.322									3	2	21	8.89374	7.84505	0.925409	3.40928	38.3334	38.3334
																		2	18	23	5.85751	4.92804	0.896199	2.9672	50.6564	49.3436									3	10	56	6.58489	5.22851	0.837527	2.53979	38.5699	38.5699
																		2	6	1	5.2076	4.03867	0.828413	2.57045	49.3595	49.3595									3	7	11	7.52455	6.43626	0.88035	2.90403	38.5941	38.5941
																		2	11	95	7.38028	6.34193	0.892789	3.64769	49.4249	49.4249									3	9	4	6.78082	5.88062	0.931229	4.15474	61.2719	38.7281
																		2	9	55	5.93751	4.93115	0.874023	2.93466	49.4258	49.4258									3	4	16	8.14825	7.07863	0.918612	4.98904	61.2283	38.7717
																		2	19	268	6.89995	5.8905	0.907535	3.41066	49.4302	49.4302									3	10	67	5.86639	4.93231	0.884106	3.5915	61.2216	38.7784
																		2	9	59	12.6888	11.1025	0.894158	6.4167	50.5696	49.4304									3	3	29	18.5396	16.8442	0.940865	11.33	61.1122	38.8878
																		2	1	120	9.39762	7.95082	0.879746	4.64609	49.439	49.439									3	17	21	13.9901	12.1563	0.888304	5.47712	39.1499	39.1499
																		2	1	287	6.98048	5.68305	0.843123	3.45363	49.4755	49.4755									3	15	12	10.1577	8.41112	0.841477	6.17921	60.8328	39.1672
																		2	19	395	7.06997	5.6024	0.826152	3.49794	49.476	49.476									3	17	22	7.31319	6.22672	0.891156	2.86763	39.2117	39.2117
																		2	7	18	5.0723	3.83443	0.810547	2.56259	50.5212	49.4788									3	3	23	6.53964	5.58705	0.910589	2.56871	39.2791	39.2791
																		2	5	79	7.50428	6.15451	0.835804	3.71596	49.5179	49.5179									3	10	7	8.27179	6.80105	0.841909	5.00905	60.5558	39.4442
																		2	1	114	6.5931	5.2531	0.819974	3.26557	49.5302	49.5302									3	4	9	9.97509	8.7145	0.9281	6.03075	60.4581	39.5419
																		2	14	15	6.82079	5.61783	0.883309	3.44117	50.4512	49.5488									3	6	154	5.87797	4.75383	0.83028	2.32544	39.5619	39.5619
																		2	19	124	5.2622	4.12272	0.832289	2.60817	49.5642	49.5642									3	7	3	9.76779	8.69434	0.919197	5.89088	60.3092	39.6908
																		2	11	348	6.72055	5.58466	0.878462	3.33156	49.5727	49.5727									3	6	9	9.93559	8.60953	0.897484	5.97777	60.1653	39.8347
																		2	9	14	10.2352	8.52831	0.851052	5.08195	49.6517	49.6517									3	3	2	11.4223	9.45503	0.832398	6.85598	60.0228	39.9772
																		2	13	88	8.10153	6.79273	0.876469	4.02591	49.6932	49.6932									3	16	14	9.33021	8.41479	0.932949	3.74011	40.086	40.086
																		2	7	27	5.27428	4.48559	0.917954	2.65236	50.2885	49.7115									3	11	1	9.34464	7.91303	0.865796	5.59779	59.9038	40.0962
																		2	19	399	6.80141	5.46755	0.83821	3.38143	49.7165	49.7165									3	8	17	3.78961	3.23762	0.934143	1.52096	40.1349	40.1349
																		2	7	332	10.8682	9.17969	0.88118	5.46061	50.2442	49.7558									3	8	10	5.62589	4.80629	0.903259	3.35812	59.6905	40.3095
																		2	15	365	10.2538	8.50531	0.839502	5.1516	50.2408	49.7592									3	11	8	17.3575	15.5625	0.943855	10.348	59.6167	40.3833
																		2	11	99	8.53359	7.02903	0.848391	4.24979	49.8007	49.8007									3	17	1	8.65992	7.59116	0.903592	3.49884	40.4027	40.4027
																		2	2	31	9.15852	7.7114	0.868365	4.5945	50.1664	49.8336									3	15	4	8.08773	6.91464	0.899582	3.27698	40.5179	40.5179
																		2	5	327	6.4131	5.08723	0.830501	3.19676	49.8473	49.8473									3	3	16	6.70955	5.86961	0.922672	2.72123	40.5576	40.5576
																		2	9	449	8.93377	7.54939	0.890269	4.458	49.9006	49.9006									3	13	11	9.28074	7.79142	0.857706	5.48955	59.1498	40.8502
																		2	5	321	6.91361	5.48011	0.818712	3.45009	49.9028	49.9028									3	13	1	6.79285	6.08172	0.947237	2.7945	41.1388	41.1388
																		2	13	94	5.89358	5.06333	0.92235	2.95014	50.0568	49.9432									3	16	10	8.55543	7.50115	0.924782	5.02148	58.6935	41.3065
																		3	1	7	8.94562	7.6386	0.894429		0	0									3	11	7	10.6958	9.39094	0.923882	6.2725	58.6446	41.3554
																		3	1	11	6.19541	5.01832	0.864403		0	0									3	8	16	8.74011	7.46038	0.923048	5.10573	58.4173	41.5827
																		3	1	39	3.96838	3.31839	0.907924		0	0									3	2	12	6.68613	5.86074	0.927082	2.79587	41.8159	41.8159
																		3	1	42	4.64703	3.88899	0.891913		0	0									3	1	10	5.98834	5.0717	0.888012	2.50797	41.8809	41.8809
																		3	1	95	6.42358	5.45431	0.897477		0	0									3	1	5	7.23309	6.16514	0.885051	3.04698	42.1255	42.1255
																		3	1	187	5.49003	4.42935	0.861475		0	0									3	17	186	8.40566	7.27407	0.925096	4.85562	57.7661	42.2339
																		3	1	193	5.87826	4.89068	0.878957		0	0									3	10	43	7.12162	6.14933	0.917316	3.00886	42.2497	42.2497
																		3	2	8	2.0735	1.5592	0.868844		0	0									3	6	17	8.49296	7.45804	0.919158	3.61741	42.5931	42.5931
																		3	2	17	7.11144	5.9674	0.888919		0	0									3	15	6	6.64635	5.70042	0.904978	3.80388	57.2326	42.7674
																		3	3	24	8.00846	6.91558	0.909454		0	0									3	12	172	7.81281	6.51292	0.876909	3.34778	42.8499	42.8499
																		3	3	35	6.14961	5.03981	0.865737		0	0									3	5	7	10.1228	8.83276	0.918791	4.34821	42.9547	42.9547
																		3	3	38	4.50441	3.70323	0.887618		0	0									3	3	189	16.7962	14.0106	0.845081	9.58	57.0367	42.9633
																		3	3	200	6.22136	4.96959	0.827842		0	0									3	1	14	5.61072	4.66491	0.866374	3.18564	56.7778	43.2222
																		3	4	1	7.7912	6.68806	0.902647		0	0									3	3	138	9.44901	7.8736	0.879004	4.09204	43.3066	43.3066
																		3	6	4	10.1788	8.28949	0.850318		0	0									3	12	7	9.91784	8.87619	0.938438	5.6109	56.5738	43.4262
																		3	7	19	6.05588	5.12973	0.921013		0	0									3	3	26	8.52532	7.26468	0.894712	3.71004	43.5179	43.5179
																		3	8	143	0.280189	0.023197	0.113136		0	0									3	1	131	6.7432	5.6318	0.891843	3.80709	56.4582	43.5418
																		3	10	24	5.95138	4.95135	0.891999		0	0									3	3	30	10.9408	9.48005	0.893919	6.1743	56.4339	43.5661
																		3	10	30	5.06035	4.30393	0.904612		0	0									3	3	13	10.099	8.74005	0.889625	5.69551	56.3969	43.6031
																		3	11	32	5.5011	4.43169	0.867575		0	0									3	6	20	5.64189	4.48176	0.856654	2.46596	43.7081	43.7081
																		3	11	164	5.35904	4.28669	0.833749		0	0									3	6	10	6.16543	5.15787	0.887715	2.69678	43.7403	43.7403
																		3	14	8	6.01537	4.96864	0.87399		0	0									3	16	5	9.46589	8.11158	0.897588	5.32482	56.2527	43.7473
																		3	14	11	9.0545	7.59829	0.860874		0	0									3	9	9	6.50974	5.48259	0.872315	2.8575	43.8958	43.8958
																		3	15	15	4.58741	3.51971	0.822454		0	0									3	13	10	3.82659	3.13026	0.904343	2.14117	55.9551	44.0449
																		3	15	17	5.66172	4.66272	0.890578		0	0									3	12	14	7.64781	6.48736	0.910044	3.38511	44.2624	44.2624
																		3	15	22	4.73875	3.97652	0.914526		0	0									3	6	16	7.44032	6.59616	0.934882	3.29519	44.2883	44.2883
																		3	17	1	8.94332	7.63844	0.89158		0	0									3	3	18	6.7808	5.93064	0.928764	3.00371	44.2973	44.2973
																		3	17	4	4.64141	3.94633	0.921831		0	0									3	8	156	9.92393	8.30643	0.846649	5.51975	55.6206	44.3794
																		3	17	10	5.49577	4.73717	0.915705		0	0									3	13	14	8.77833	7.54978	0.887292	4.87499	55.5344	44.4656
																		3	18	47	5.32861	4.39784	0.873415		0	0									3	3	17	7.41713	6.45051	0.902779	4.10827	55.3889	44.6111
																		3	18	54	6.33719	5.4585	0.917005		0	0									3	2	1	9.01829	7.87821	0.901814	4.99245	55.3591	44.6409
																		3	18	58	4.66448	3.7584	0.870931		0	0									3	5	5	9.79093	8.50952	0.899436	5.41965	55.3537	44.6463
																		3	18	269	7.04816	5.8285	0.887171		0	0									3	2	16	5.22279	4.33652	0.893071	2.88715	55.2798	44.7202
																		3	4	22	8.40284	7.23694	0.927575	8.16788	97.2037	2.79629									3	13	2	7.47855	6.35428	0.884138	4.12915	55.2132	44.7868
																		3	18	46	5.88098	4.83816	0.900018	5.47351	93.0714	6.92863									3	1	132	6.14874	5.0774	0.875004	2.75557	44.8151	44.8151
																		3	15	18	5.46916	4.54748	0.896391	0.403097	7.37037	7.37037									3	10	117	12.3582	10.1719	0.846294	6.81448	55.1414	44.8586
																		3	18	10	9.53363	7.77248	0.838294	0.729166	7.64836	7.64836									3	5	1	6.4311	5.64339	0.938936	3.52779	54.8552	45.1448
																		3	18	43	9.3664	7.54083	0.814698	8.621	92.0418	7.95823									3	10	169	9.86448	8.1641	0.873973	4.45666	45.1789	45.1789
																		3	1	99	7.49436	6.51146	0.909801	0.653521	8.72017	8.72017									3	3	6	5.2293	4.34993	0.883521	2.36279	45.1837	45.1837
																		3	7	209	5.21249	4.42883	0.923715	0.495736	9.51055	9.51055									3	5	152	10.1604	8.55372	0.837298	4.59408	45.2155	45.2155
																		3	3	19	6.22866	5.22663	0.897448	5.62938	90.3787	9.62134									3	1	15	8.35942	7.16758	0.872575	4.57394	54.716	45.284
																		3	11	17	6.17616	4.99563	0.859232	0.595951	9.64922	9.64922									3	4	148	12.5363	10.7783	0.879002	6.85905	54.7134	45.2866
																		3	11	6	15.5145	12.7724	0.83469	13.9977	90.2233	9.77671									3	3	34	8.3109	7.32146	0.919027	3.77653	45.4407	45.4407
																		3	13	22	7.24345	6.15322	0.892805	0.710954	9.81513	9.81513									3	2	2	6.26541	5.30544	0.892715	2.86192	45.678	45.678
																		3	1	87	10.5636	8.6622	0.834071	1.10669	10.4764	10.4764									3	10	15	8.15008	6.99496	0.881779	3.72632	45.7213	45.7213
																		3	13	23	7.66341	6.59292	0.903	6.80298	88.7722	11.2278									3	1	19	7.76163	6.5455	0.861402	4.21192	54.2659	45.7341
																		3	15	23	4.59602	3.87692	0.902698	0.545455	11.868	11.868									3	7	6	9.05058	8.04191	0.923257	4.89216	54.0536	45.9464
																		3	3	86	5.22985	4.05423	0.836623	0.622402	11.9009	11.9009									3	12	8	5.69321	4.33831	0.808678	2.6169	45.9652	45.9652
																		3	18	38	4.57768	3.5641	0.844537	4.00873	87.5712	12.4288									3	14	180	8.8647	7.01688	0.805025	4.79	54.0346	45.9654
																		3	12	6	20.5527	17.6658	0.876914	17.8295	86.7503	13.2497									3	8	9	7.8161	6.83018	0.908818	3.59345	45.9751	45.9751
																		3	12	2	15.378	13.8168	0.934875	13.2607	86.2317	13.7683									3	4	151	10.1409	8.54122	0.874672	5.47453	53.9847	46.0153
																		3	8	144	5.64364	4.56502	0.855386	4.86013	86.117	13.883									3	13	4	9.0059	7.79928	0.904447	4.14558	46.0318	46.0318
																		3	16	13	16.103	14.1444	0.883608	13.8219	85.8344	14.1656									3	10	16	15.0198	13.0812	0.890057	6.92613	46.1133	46.1133
																		3	1	191	5.47949	4.52784	0.867332	4.68192	85.4445	14.5555									3	10	34	5.90922	4.90503	0.85982	2.72607	46.1325	46.1325
																		3	18	12	6.39963	5.20033	0.874152	0.936269	14.6301	14.6301									3	10	102	7.32549	6.02452	0.843218	3.38324	46.1846	46.1846
																		3	15	1	5.55674	4.78292	0.92287	4.7371	85.2495	14.7505									3	10	74	6.67329	5.69682	0.907376	3.08286	46.197	46.197
																		3	1	66	6.22057	5.00553	0.863003	5.27412	84.7851	15.2149									3	5	2	7.06118	6.05267	0.913189	3.79205	53.7029	46.2971
																		3	1	188	5.92428	4.6832	0.82536	5.0129	84.6162	15.3838									3	15	14	8.36742	7.4034	0.932303	3.87572	46.3192	46.3192
																		3	14	5	4.99861	4.19517	0.910704	0.770533	15.4149	15.4149									3	14	11	14.5223	12.7697	0.896228	7.79413	53.6701	46.3299
																		3	10	23	4.74454	3.95768	0.901707	4.00881	84.4932	15.5068									3	4	12	5.71334	4.84594	0.901694	2.64872	46.3602	46.3602
																		3	18	77	5.23056	4.35046	0.885185	0.835606	15.9755	15.9755									3	3	28	21.8351	19.9476	0.932617	10.1338	46.4108	46.4108
																		3	11	232	5.17078	4.0303	0.828119	4.32937	83.7276	16.2724									3	13	12	9.53036	8.43835	0.920929	5.10654	53.5818	46.4182
																		3	9	40	5.67376	4.79149	0.892195	0.924568	16.2955	16.2955									3	6	6	10.3213	9.15057	0.913924	5.52151	53.4963	46.5037
																		3	4	203	6.04236	4.77154	0.820254	0.984738	16.2972	16.2972									3	1	28	10.8799	9.22351	0.856386	5.81332	53.4317	46.5683
																		3	16	2	6.68192	5.50466	0.874569	1.1183	16.7363	16.7363									3	1	134	7.95281	6.78556	0.888601	3.70614	46.6017	46.6017
																		3	18	7	6.47451	5.11185	0.844075	1.08431	16.7474	16.7474									3	9	3	5.22301	4.29756	0.886314	2.78575	53.336	46.664
																		3	18	272	5.24859	4.17524	0.844973	0.883629	16.8356	16.8356									3	16	11	10.0698	8.97322	0.91645	5.37023	53.3302	46.6698
																		3	12	29	6.01678	5.12296	0.91224	5.00007	83.1022	16.8978									3	15	10	6.73709	6.00898	0.942416	3.59136	53.3073	46.6927
																		3	9	221	7.19336	6.15972	0.902645	5.95598	82.7982	17.2018									3	15	8	8.59037	7.75431	0.949258	4.57461	53.2527	46.7473
																		3	17	5	20.1984	17.7298	0.902198	3.48594	17.2585	17.2585									3	10	60	6.55403	5.22976	0.827789	3.06466	46.76	46.76
																		3	14	22	25.6588	22.5077	0.873007	21.2277	82.7307	17.2693									3	17	8	6.62802	5.79476	0.919452	3.52742	53.2198	46.7802
																		3	18	51	14.3188	12.4922	0.904594	2.49295	17.4103	17.4103									3	2	5	8.09918	7.06124	0.92006	4.30809	53.1917	46.8083
																		3	4	8	5.3502	4.25699	0.829328	0.943293	17.631	17.631									3	2	6	9.19723	7.78472	0.881351	4.892	53.1899	46.8101
																		3	3	83	5.83847	4.60713	0.822047	1.04939	17.9738	17.9738									3	10	162	5.75858	4.84288	0.891825	2.69601	46.8172	46.8172
																		3	17	264	7.0119	5.62422	0.834386	1.26196	17.9974	17.9974									3	3	141	8.19996	6.88925	0.881727	4.35324	53.0885	46.9115
																		3	7	13	5.3078	4.497	0.909791	4.35022	81.9591	18.0409									3	2	13	7.94005	6.97607	0.920482	4.20994	53.0216	46.9784
																		3	18	276	6.80427	5.74597	0.898902	1.24329	18.2722	18.2722									3	2	3	10.3017	8.84493	0.887482	5.45892	52.9903	47.0097
																		3	7	14	5.0947	4.35742	0.909567	4.16131	81.6792	18.3208									3	8	20	11.0687	9.75624	0.900809	5.85329	52.8815	47.1185
																		3	18	72	5.30787	4.53259	0.910929	4.33084	81.5927	18.4073									3	15	7	15.2332	13.2901	0.876098	7.19807	47.2526	47.2526
																		3	8	32	5.61166	4.71026	0.90211	4.57237	81.4797	18.5203									3	17	2	6.57554	5.66808	0.89991	3.10876	47.2776	47.2776
																		3	12	7	5.86167	4.74764	0.853588	1.08828	18.566	18.566									3	4	149	9.92764	8.51319	0.898251	5.22469	52.6277	47.3723
																		3	7	1	6.84036	5.67921	0.857182	1.27056	18.5744	18.5744									3	8	12	7.37964	6.55413	0.938931	3.87142	52.4608	47.5392
																		3	2	2	5.55522	4.75733	0.928464	1.03711	18.6691	18.6691									3	6	3	5.28136	4.45423	0.914571	2.51151	47.5542	47.5542
																		3	3	88	6.67905	5.18868	0.819138	5.41611	81.091	18.909									3	3	27	9.76306	8.43271	0.87716	4.64882	47.6164	47.6164
																		3	7	205	7.50776	5.92914	0.830025	6.08582	81.0604	18.9396									3	12	2	6.48655	5.17096	0.812842	3.09268	47.6784	47.6784
																		3	13	248	11.409	9.65263	0.885084	9.21735	80.7904	19.2096									3	3	139	9.23531	7.57715	0.842607	4.82523	52.2476	47.7524
																		3	3	58	10.6997	8.95455	0.847164	8.63356	80.6901	19.3099									3	10	19	9.43916	7.5758	0.836146	4.92858	52.2141	47.7859
																		3	14	26	5.72602	4.80056	0.886879	4.60768	80.4691	19.5309									3	10	4	5.31651	4.20549	0.836202	2.76711	52.0476	47.9524
																		3	18	16	5.30955	4.1305	0.822037	1.05026	19.7806	19.7806									3	8	6	10.5712	9.12846	0.899608	5.07048	47.9649	47.9649
																		3	16	17	6.29337	5.30544	0.892216	5.04739	80.2018	19.7982									3	17	15	6.71083	5.7852	0.91713	3.2196	47.9762	47.9762
																		3	18	56	5.28435	4.29492	0.878225	1.05042	19.8779	19.8779									3	3	19	7.23195	6.38557	0.938062	3.47056	47.9892	47.9892
																		3	16	23	6.17044	5.2076	0.912968	1.22831	19.9063	19.9063									3	6	7	15.2849	13.2866	0.90027	7.36342	48.1745	48.1745
																		3	17	9	6.3908	5.4406	0.915948	5.11825	80.0877	19.9123									3	7	9	11.2725	10.054	0.918228	5.43069	48.1765	48.1765
																		3	8	8	4.45575	3.61379	0.895456	0.894792	20.0817	20.0817									3	7	4	10.4967	9.32618	0.90023	5.07735	48.3709	48.3709
																		3	4	14	6.40599	5.25911	0.84229	1.2883	20.1108	20.1108									3	12	1	18.2631	15.9167	0.87919	9.41909	51.5743	48.4257
																		3	16	259	6.23715	5.17936	0.878035	1.26452	20.274	20.274									3	12	174	9.57437	8.1516	0.839034	4.63982	48.4609	48.4609
																		3	11	38	9.08864	7.70946	0.902518	7.24264	79.689	20.311									3	14	6	9.27864	8.19993	0.919857	4.4973	48.4694	48.4694
																		3	2	4	5.70234	4.79209	0.91647	4.54001	79.6166	20.3834									3	7	10	10.0231	8.6472	0.892378	4.8635	48.5227	48.5227
																		3	18	26	5.77929	4.63661	0.838606	4.59785	79.5572	20.4428									3	8	158	14.443	12.2757	0.853482	7.0118	48.5479	48.5479
																		3	7	25	6.99203	5.70817	0.85588	1.44277	20.6346	20.6346									3	14	179	6.50021	5.1109	0.814244	3.34227	51.4179	48.5821
																		3	3	50	7.28522	6.07096	0.883629	5.76668	79.1559	20.8441									3	13	9	9.80973	7.90342	0.831942	4.76984	48.6236	48.6236
																		3	12	168	7.42921	6.05707	0.82568	5.86834	78.99	21.01									3	17	18	8.22809	7.26394	0.932086	4.00222	48.6409	48.6409
																		3	12	12	5.05601	4.15855	0.89406	3.97693	78.6574	21.3426									3	1	13	6.78668	5.77005	0.885177	3.48259	51.315	48.685
																		3	8	16	4.89784	4.04977	0.892283	1.05115	21.4616	21.4616									3	10	111	8.66433	7.21823	0.875349	4.44261	51.2748	48.7252
																		3	15	31	5.50333	4.74107	0.932834	4.31553	78.4166	21.5834									3	10	110	7.40068	6.00058	0.838986	3.60724	48.742	48.742
																		3	14	14	6.62217	5.35827	0.8691	1.44451	21.8133	21.8133									3	4	5	6.69272	5.48608	0.882289	3.26383	48.7669	48.7669
																		3	1	35	5.49685	4.54254	0.894874	1.20392	21.9019	21.9019									3	12	9	5.88782	5.10816	0.919071	3.01299	51.1733	48.8267
																		3	12	17	5.06631	4.14033	0.861517	1.11118	21.9328	21.9328									3	10	171	6.89676	5.48233	0.821254	3.37045	48.8701	48.8701
																		3	4	10	7.26536	6.26588	0.93225	1.59961	22.0169	22.0169									3	10	3	10.2288	8.40979	0.849468	5.22531	51.0841	48.9159
																		3	18	31	4.60989	3.76999	0.896878	3.58403	77.7465	22.2535									3	8	18	6.8195	6.00694	0.942346	3.33652	48.9261	48.9261
																		3	8	7	5.42625	4.5875	0.898949	4.21601	77.6967	22.3033									3	13	176	7.76498	6.84332	0.929905	3.80119	48.953	48.953
																		3	14	43	5.91379	5.07654	0.922377	1.34724	22.7814	22.7814									3	6	2	16.6615	14.912	0.911365	8.5043	51.0417	48.9583
																		3	11	27	7.8388	6.61772	0.887383	1.81542	23.1594	23.1594									3	7	2	7.94567	7.12793	0.94334	3.89352	49.0018	49.0018
																		3	8	53	7.61422	6.41738	0.879698	5.84584	76.7753	23.2247									3	1	3	11.1797	9.68192	0.887607	5.69731	50.961	49.039
																		3	3	41	6.25698	5.31565	0.896735	4.79238	76.5926	23.4074									3	6	191	6.8716	5.71133	0.893311	3.50114	50.9509	49.0491
																		3	16	6	5.68686	4.78745	0.897017	1.33426	23.4622	23.4622									3	8	5	6.1916	4.73769	0.798304	3.15156	50.9006	49.0994
																		3	14	24	3.89137	3.10886	0.848071	2.97749	76.5154	23.4846									3	15	5	9.83331	8.83854	0.941247	4.99748	50.822	49.178
																		3	9	224	6.88015	5.44499	0.826429	5.26089	76.4648	23.5352									3	10	167	9.26808	7.92232	0.89092	4.7065	50.7819	49.2181
																		3	13	29	5.24527	4.3493	0.887694	1.24628	23.7601	23.7601									3	14	13	9.18048	8.24031	0.945982	4.65914	50.7506	49.2494
																		3	12	27	7.09001	6.1494	0.920936	5.40439	76.2254	23.7746									3	10	2	17.4216	14.8103	0.878982	8.82959	50.6819	49.3181
																		3	13	18	16.1847	14.0716	0.878053	3.87125	23.9192	23.9192									3	4	147	8.63139	7.44642	0.903533	4.36945	50.6229	49.3771
																		3	9	46	7.80476	6.23665	0.844659	5.92033	75.8554	24.1446									3	12	4	7.28013	6.43623	0.940269	3.60715	49.5479	49.5479
																		3	8	3	5.13635	4.15778	0.863024	1.24176	24.176	24.176									3	1	21	11.9828	10.2134	0.862439	5.93901	49.5628	49.5628
																		3	3	5	5.75401	4.88777	0.901358	1.40582	24.432	24.432									3	7	7	7.03105	5.98693	0.882646	3.54621	50.4365	49.5635
																		3	9	4	4.73532	3.68633	0.830934	1.16136	24.5254	24.5254									3	15	9	14.7858	13.068	0.889003	7.43998	50.3184	49.6816
																		3	9	11	7.88232	6.57885	0.886737	5.9296	75.2265	24.7735									3	14	10	8.40504	7.27841	0.914667	4.22523	50.2701	49.7299
																		3	10	11	4.90012	3.88223	0.846611	3.6808	75.1165	24.8835									3	17	185	9.90361	8.60878	0.908865	4.97807	50.2651	49.7349
																		3	8	33	5.42694	4.38926	0.889422	4.06959	74.9887	25.0113									3	3	188	11.2814	9.3508	0.845007	5.66441	50.21	49.79
																		3	3	79	7.59442	6.46249	0.893887	1.91666	25.2377	25.2377									3	9	7	7.64331	6.78045	0.93269	3.8371	50.2021	49.7979
																		3	1	85	6.34221	5.32275	0.883156	1.60409	25.2923	25.2923									3	4	144	5.83516	4.94557	0.898692	2.92908	50.1971	49.8029
																		3	9	39	5.81914	4.99089	0.922659	4.33077	74.4228	25.5772									3	12	10	9.83848	8.50736	0.894634	4.90072	49.8118	49.8118
																		3	13	16	7.63641	6.57237	0.904313	5.67136	74.2674	25.7326									3	5	4	8.67784	7.58202	0.895227	4.35216	50.1526	49.8474
																		3	10	21	6.66369	5.28495	0.802805	1.73371	26.0173	26.0173									3	14	12	10.6997	9.27424	0.899928	5.33773	49.8866	49.8866
																		3	11	15	5.23116	4.02398	0.829816	1.36737	26.139	26.139									3	6	14	7.1644	5.65339	0.824471	3.59007	50.1099	49.8901
																		3	9	10	4.93976	3.87413	0.825139	1.30032	26.3236	26.3236									3	3	20	8.891	7.71381	0.886484	4.45465	50.103	49.897
																		3	15	6	9.45573	8.06475	0.891063	6.96058	73.6122	26.3878									3	4	11	8.78956	7.59031	0.895104	4.40269	50.09	49.91
																		3	14	3	8.13826	7.16931	0.921741	5.9899	73.6018	26.3982									3	4	8	6.7882	5.81227	0.89669	3.3893	49.9293	49.9293
																		3	1	6	12.8081	10.9625	0.888396	3.38763	26.4491	26.4491									3	10	62	7.30977	5.86859	0.852875	3.65055	49.9408	49.9408
																		3	1	20	5.67926	4.63375	0.851164	4.16172	73.2792	26.7208
																		3	14	15	8.36463	6.72592	0.845577	2.2379	26.7543	26.7543
																		3	7	208	10.0951	8.21374	0.822026	2.70727	26.8176	26.8176
																		3	13	8	5.70251	4.55746	0.831339	1.5356	26.9284	26.9284
																		3	1	37	6.17008	4.96559	0.84146	1.66395	26.968	26.968
																		3	10	29	5.16134	4.43534	0.91681	1.39734	27.0731	27.0731
																		3	18	44	6.5618	5.56866	0.900459	1.78277	27.1689	27.1689
																		3	10	2	4.75154	3.96408	0.901164	3.45432	72.6989	27.3011
																		3	9	6	5.04725	3.78111	0.811549	1.38189	27.3791	27.3791
																		3	1	69	6.14192	4.83157	0.829318	1.68617	27.4535	27.4535
																		3	9	19	4.19374	3.13581	0.811967	1.16364	27.747	27.747
																		3	4	7	5.37489	4.2301	0.808413	3.87732	72.1376	27.8624
																		3	14	40	8.74362	7.44359	0.872011	2.44047	27.9114	27.9114
																		3	4	25	5.98438	5.21934	0.935056	1.68343	28.1304	28.1304
																		3	16	7	9.89553	8.5134	0.899227	2.78382	28.1321	28.1321
																		3	3	82	5.69577	4.73203	0.886558	1.60537	28.1853	28.1853
																		3	12	23	7.43046	6.47627	0.917227	5.33319	71.7748	28.2252
																		3	14	30	13.6267	12.0562	0.899059	3.84656	28.2281	28.2281
																		3	17	265	10.4298	8.63001	0.833653	2.94502	28.2366	28.2366
																		3	15	21	5.86497	5.01339	0.914569	1.66522	28.3927	28.3927
																		3	16	25	7.58042	6.44293	0.88168	5.42224	71.5295	28.4705
																		3	18	62	7.93809	6.88022	0.909102	5.67699	71.5159	28.4841
																		3	14	253	6.21939	5.19212	0.904181	4.43931	71.3786	28.6214
																		3	18	27	8.6378	6.98583	0.819017	6.15983	71.3125	28.6875
																		3	13	20	10.0452	8.30424	0.845318	7.15864	71.2641	28.7359
																		3	5	7	11.4492	10.2047	0.944005	3.2905	28.7401	28.7401
																		3	8	37	7.91844	6.44131	0.842283	2.27999	28.7934	28.7934
																		3	12	4	6.39268	5.47829	0.917384	1.8437	28.8409	28.8409
																		3	3	7	6.97887	5.92297	0.896753	2.02907	29.0744	29.0744
																		3	3	57	7.38075	5.84611	0.820573	5.22976	70.8567	29.1433
																		3	8	50	5.84	4.67303	0.851883	4.1321	70.7551	29.2449
																		3	18	274	16.0556	13.6086	0.865878	11.3294	70.5633	29.4367
																		3	4	29	7.43962	6.31913	0.902313	5.24622	70.5173	29.4827
																		3	1	8	6.60871	5.6695	0.907813	4.65641	70.4586	29.5414
																		3	18	66	5.43784	4.58596	0.907943	1.6081	29.5724	29.5724
																		3	6	27	5.90149	5.02284	0.906345	1.75244	29.6949	29.6949
																		3	5	5	5.72833	4.86841	0.906061	1.70577	29.7778	29.7778
																		3	2	18	5.70696	4.95055	0.924927	4.00312	70.1444	29.8556
																		3	4	20	5.72621	4.71036	0.873295	4.01588	70.1316	29.8684
																		3	6	32	5.39221	4.41439	0.883727	1.61687	29.9854	29.9854
																		3	14	37	5.72574	4.85748	0.910356	1.72234	30.0806	30.0806
																		3	9	12	5.11188	4.15186	0.891437	3.56957	69.8289	30.1711
																		3	18	75	7.99172	6.87724	0.905238	2.4119	30.1799	30.1799
																		3	16	21	8.98621	7.80902	0.907838	6.261	69.6734	30.3266
																		3	12	33	4.27019	3.53825	0.890206	1.29968	30.4361	30.4361
																		3	4	19	7.13991	6.04246	0.905096	4.95692	69.4255	30.5745
																		3	1	186	4.41307	3.6997	0.918315	3.06163	69.3763	30.6237
																		3	15	19	7.05833	5.93045	0.908909	4.89467	69.3461	30.6539
																		3	1	111	5.23329	4.21497	0.838417	3.62539	69.2756	30.7244
																		3	8	213	14.3945	12.528	0.896957	4.46196	30.9976	30.9976
																		3	9	52	6.21355	5.37688	0.9163	4.2873	68.9992	31.0008
																		3	7	18	4.84991	4.09317	0.910765	1.5052	31.0357	31.0357
																		3	13	32	8.04493	6.95453	0.898766	2.49806	31.0514	31.0514
																		3	1	110	4.56879	3.5367	0.830016	3.14811	68.9047	31.0953
																		3	18	5	5.25545	4.37983	0.903548	1.63572	31.1243	31.1243
																		3	3	199	5.11288	4.09293	0.826641	1.59187	31.1344	31.1344
																		3	15	7	5.29377	4.4319	0.898643	3.64452	68.8455	31.1545
																		3	11	24	7.74727	6.7684	0.91204	5.32792	68.7717	31.2283
																		3	16	8	5.70554	4.88682	0.912596	1.78393	31.2666	31.2666
																		3	12	8	4.58747	3.71958	0.908147	1.44203	31.4341	31.4341
																		3	14	19	10.825	9.37923	0.919048	7.40626	68.4182	31.5818
																		3	9	26	7.85357	6.53153	0.877038	2.48306	31.617	31.617
																		3	5	6	10.4704	9.04315	0.938261	7.15889	68.3727	31.6273
																		3	17	7	6.98726	5.96716	0.920236	4.77629	68.3571	31.6429
																		3	3	52	9.22894	7.91374	0.905838	2.92089	31.6493	31.6493
																		3	1	30	7.33568	5.97471	0.834136	2.32257	31.6612	31.6612
																		3	8	45	4.68051	3.88381	0.894965	1.48526	31.7329	31.7329
																		3	18	68	7.36728	6.31472	0.906315	2.34832	31.875	31.875
																		3	8	17	4.98188	4.15654	0.892714	1.59596	32.0354	32.0354
																		3	18	40	6.07824	5.00433	0.882621	1.95436	32.1533	32.1533
																		3	2	196	8.48326	6.9647	0.841018	2.72908	32.1701	32.1701
																		3	18	266	9.19609	7.96978	0.907835	6.21057	67.5349	32.4651
																		3	6	17	4.72743	3.57241	0.809682	1.53508	32.4718	32.4718
																		3	8	23	5.93108	5.13707	0.937492	4.00069	67.453	32.547
																		3	3	42	5.39942	4.5276	0.922289	1.76371	32.6649	32.6649
																		3	11	229	7.33119	6.01364	0.836825	2.39677	32.6928	32.6928
																		3	18	76	7.55391	6.53493	0.913772	5.07923	67.2397	32.7603
																		3	4	204	6.0651	5.15659	0.925683	1.99365	32.8709	32.8709
																		3	12	34	6.30568	5.16048	0.873492	2.07553	32.9153	32.9153
																		3	17	13	9.05586	7.98458	0.922283	2.98119	32.92	32.92
																		3	15	12	8.14007	6.96234	0.909522	5.46026	67.0788	32.9212
																		3	11	234	6.74526	5.41296	0.825694	2.22068	32.922	32.922
																		3	10	28	5.60283	4.81867	0.926688	1.8575	33.1529	33.1529
																		3	18	53	6.69401	5.65455	0.888729	4.47385	66.8337	33.1663
																		3	1	33	10.6299	9.21952	0.915281	3.54684	33.3665	33.3665
																		3	6	16	6.25827	5.21663	0.863307	2.09876	33.5358	33.5358
																		3	11	12	6.39621	5.46825	0.900435	4.23225	66.1681	33.8319
																		3	2	11	10.0068	8.81549	0.927621	3.39249	33.9017	33.9017
																		3	1	101	5.4799	4.665	0.911458	1.85861	33.9168	33.9168
																		3	9	15	8.05103	6.80103	0.887279	5.31268	65.9876	34.0124
																		3	18	52	8.28392	6.87328	0.898821	5.43923	65.66	34.34
																		3	12	10	5.77556	4.87905	0.902254	1.98984	34.4527	34.4527
																		3	6	5	5.05162	4.01414	0.832557	1.74075	34.4592	34.4592
																		3	8	2	5.19301	4.43585	0.916821	3.40168	65.505	34.495
																		3	10	22	7.31613	6.25256	0.900774	4.78687	65.429	34.571
																		3	13	250	7.97249	6.60217	0.880863	5.21164	65.3703	34.6297
																		3	9	36	7.16407	5.65805	0.830552	2.48538	34.6924	34.6924
																		3	8	13	7.55197	6.42565	0.906995	4.93196	65.3068	34.6932
																		3	10	26	5.89684	5.04863	0.93118	2.04946	34.7553	34.7553
																		3	10	9	8.354	7.18428	0.920106	2.90536	34.7781	34.7781
																		3	1	100	5.30286	4.19502	0.843702	3.45637	65.1795	34.8205
																		3	12	5	9.88098	7.98424	0.827448	3.44198	34.8344	34.8344
																		3	18	9	5.87645	4.88677	0.883538	3.82099	65.0221	34.9779
																		3	13	244	8.87874	7.18465	0.821843	5.7633	64.9113	35.0887
																		3	18	50	5.82035	4.87407	0.897457	2.04727	35.1743	35.1743
																		3	18	35	7.05442	5.93412	0.893238	4.57211	64.8119	35.1881
																		3	1	54	4.63101	3.73995	0.870322	2.99935	64.7666	35.2334
																		3	14	25	4.95693	4.07075	0.893749	1.75279	35.3605	35.3605
																		3	4	16	8.49467	7.46223	0.927495	3.02668	35.6304	35.6304
																		3	3	1	7.30428	6.232	0.896829	4.69391	64.2625	35.7375
																		3	1	1	4.96484	3.99221	0.866455	1.77919	35.8357	35.8357
																		3	3	73	5.62801	4.47284	0.853244	3.60251	64.0104	35.9896
																		3	6	6	6.46156	5.33602	0.873485	2.33399	36.1212	36.1212
																		3	11	26	8.46787	7.35639	0.913897	5.40349	63.8117	36.1883
																		3	3	78	6.80715	5.63967	0.878614	4.34033	63.7613	36.2387
																		3	9	43	6.56553	5.1769	0.828951	2.39024	36.4058	36.4058
																		3	4	202	5.89122	4.8118	0.846784	2.1479	36.4594	36.4594
																		3	3	68	7.25318	5.80221	0.830496	2.64572	36.4767	36.4767
																		3	1	190	7.54099	6.25362	0.859691	2.7657	36.6756	36.6756
																		3	12	9	5.93116	4.94211	0.885509	2.17614	36.69	36.69
																		3	1	34	6.74394	5.50033	0.853844	4.26633	63.2617	36.7383
																		3	9	59	10.5247	9.08925	0.89147	3.86715	36.7436	36.7436
																		3	18	270	6.03931	4.9328	0.861144	2.22498	36.8416	36.8416
																		3	14	21	6.00224	5.13485	0.909067	2.21824	36.9569	36.9569
																		3	8	44	7.62363	6.42536	0.881642	2.82082	37.001	37.001
																		3	3	70	8.15596	6.68693	0.842785	5.1331	62.9368	37.0632
																		3	6	22	6.52652	5.58618	0.917666	2.42558	37.1649	37.1649
																		3	1	88	6.67386	5.67484	0.90651	4.19152	62.805	37.195
																		3	10	31	8.42737	7.22488	0.90146	5.2927	62.8037	37.1963
																		3	7	142	6.27941	5.31882	0.910736	3.93915	62.7313	37.2687
																		3	12	1	7.26777	6.35611	0.927767	4.54861	62.5861	37.4139
																		3	18	59	13.1822	11.1366	0.868975	4.94302	37.4978	37.4978
																		3	16	19	9.40876	8.0351	0.881072	3.58495	38.1023	38.1023
																		3	9	54	6.19773	5.2186	0.883895	3.83611	61.8954	38.1046
																		3	18	28	9.61214	7.80696	0.813551	3.66707	38.1504	38.1504
																		3	8	41	8.16787	7.03627	0.908703	5.04284	61.7399	38.2601
																		3	10	27	5.75542	4.92426	0.929873	2.20434	38.3003	38.3003
																		3	3	39	4.9295	4.14745	0.917666	1.89161	38.3732	38.3732
																		3	18	14	5.25411	4.45697	0.905085	3.23383	61.5485	38.4515
																		3	12	37	7.86048	6.80926	0.902636	4.8353	61.514	38.486
																		3	13	13	5.35519	4.50373	0.908057	3.29296	61.491	38.509
																		3	5	3	5.93	5.17594	0.927549	2.28519	38.536	38.536
																		3	6	26	9.07462	7.65871	0.879785	5.57581	61.444	38.556
																		3	17	12	6.52988	5.57475	0.918185	2.52202	38.6227	38.6227
																		3	16	258	10.623	9.10037	0.883379	6.51827	61.3598	38.6402
																		3	3	3	6.80069	5.80316	0.907634	4.16247	61.2066	38.7934
																		3	18	30	5.73383	4.6616	0.879858	3.50299	61.0934	38.9066
																		3	7	24	7.53924	6.4355	0.898547	4.60227	61.0443	38.9557
																		3	12	11	6.46701	5.55866	0.921405	2.52787	39.0888	39.0888
																		3	15	5	7.89441	6.36014	0.840571	4.80827	60.9073	39.0927
																		3	18	267	6.81232	5.67146	0.883244	4.13545	60.7054	39.2946
																		3	13	246	6.0652	4.93795	0.851082	2.38777	39.3684	39.3684
																		3	10	18	13.6401	11.0558	0.819081	5.38364	39.4693	39.4693
																		3	15	13	4.98989	4.16896	0.922208	1.97595	39.599	39.599
																		3	1	70	5.79457	4.98303	0.908525	2.30198	39.7265	39.7265
																		3	18	69	6.07622	4.95787	0.83528	3.66187	60.2655	39.7345
																		3	7	23	6.05538	5.12899	0.8957	3.64529	60.1993	39.8007
																		3	8	38	7.72225	6.63503	0.908733	3.07675	39.8427	39.8427
																		3	3	36	16.6268	14.5884	0.906699	6.62456	39.8428	39.8428
																		3	8	10	5.37846	4.16738	0.82681	2.14935	39.9623	39.9623
																		3	18	41	9.06924	7.4874	0.866442	3.63495	40.08	40.08
																		3	6	36	8.86494	7.911	0.919773	5.31059	59.9055	40.0945
																		3	14	34	5.78387	4.69578	0.86293	2.32443	40.1882	40.1882
																		3	17	8	7.12973	6.0827	0.908799	4.25589	59.6922	40.3078
																		3	1	89	6.66444	5.26217	0.817136	2.68707	40.3196	40.3196
																		3	10	16	6.38778	5.22753	0.874681	3.80088	59.5024	40.4976
																		3	6	3	5.04941	3.85262	0.814371	3.00404	59.493	40.507
																		3	13	19	8.94763	7.65613	0.878335	5.32019	59.4592	40.5408
																		3	14	29	6.92406	5.65683	0.86669	4.11551	59.4379	40.5621
																		3	17	6	8.25465	6.90194	0.879277	4.89594	59.3112	40.6888
																		3	18	2	28.3252	24.9025	0.889153	11.532	40.713	40.713
																		3	11	7	6.36619	5.25948	0.889383	3.77239	59.2567	40.7433
																		3	3	85	6.33187	5.47582	0.909077	2.58059	40.7556	40.7556
																		3	16	262	11.4855	9.75216	0.865701	6.804	59.24	40.76
																		3	8	214	6.3847	5.22769	0.888753	3.78134	59.225	40.775
																		3	9	14	7.0286	5.55337	0.844313	2.86916	40.8212	40.8212
																		3	8	21	5.50546	4.56594	0.886829	3.2571	59.1612	40.8388
																		3	3	13	4.35086	3.26859	0.833424	2.57355	59.1504	40.8496
																		3	8	19	5.17421	4.29397	0.882397	3.05948	59.1294	40.8706
																		3	7	7	8.26095	7.1938	0.940248	3.37706	40.8798	40.8798
																		3	11	37	9.52867	8.20766	0.899463	5.63304	59.1167	40.8833
																		3	9	38	7.37963	6.30857	0.909711	4.35453	59.0074	40.9926
																		3	1	25	2.75132	2.13131	0.856982	1.62315	58.9952	41.0048
																		3	8	9	8.07293	6.74638	0.868538	3.31803	41.1007	41.1007
																		3	8	51	6.40751	5.19965	0.848512	3.77284	58.8815	41.1185
																		3	14	7	7.22711	6.25691	0.906397	2.97788	41.2043	41.2043
																		3	16	22	8.589	7.43149	0.911623	5.04071	58.6879	41.3121
																		3	14	38	10.4406	9.23141	0.920885	4.3178	41.3558	41.3558
																		3	1	183	7.78219	6.31401	0.830729	3.21929	41.3674	41.3674
																		3	18	33	5.7269	4.51981	0.84616	2.36954	41.3757	41.3757
																		3	10	225	8.42689	6.97259	0.859528	4.93813	58.5997	41.4003
																		3	16	18	7.20318	5.96333	0.851871	4.21889	58.5699	41.4301
																		3	16	5	6.82	5.73102	0.883866	2.82649	41.4442	41.4442
																		3	3	32	6.68691	5.76528	0.917461	3.90761	58.4366	41.5634
																		3	16	4	6.655	5.54721	0.871177	3.88778	58.4189	41.5811
																		3	12	20	5.00541	4.25639	0.92045	2.08456	41.6461	41.6461
																		3	8	40	10.1999	8.59301	0.863303	4.2479	41.6464	41.6464
																		3	11	1	8.00275	6.42597	0.825959	3.33772	41.7071	41.7071
																		3	8	47	8.08267	6.62727	0.834321	3.37276	41.7282	41.7282
																		3	14	254	6.35389	5.21815	0.884717	2.65298	41.7536	41.7536
																		3	12	236	7.41622	6.06277	0.835977	3.09741	41.7653	41.7653
																		3	8	215	8.23063	6.78775	0.866139	4.79255	58.2282	41.7718
																		3	18	13	5.23165	4.15193	0.865353	3.04597	58.2221	41.7779
																		3	9	217	7.95089	6.39917	0.81971	3.32979	41.8794	41.8794
																		3	17	17	7.72452	6.5789	0.894068	3.23618	41.8949	41.8949
																		3	12	35	6.25934	5.03078	0.856611	3.63625	58.0933	41.9067
																		3	5	1	6.91979	5.84627	0.905831	2.90336	41.9573	41.9573
																		3	8	43	7.95668	6.824	0.896678	4.61647	58.0201	41.9799
																		3	11	10	8.6237	7.13099	0.885664	4.99712	57.9464	42.0536
																		3	2	6	7.84611	6.91611	0.93714	4.54302	57.9016	42.0984
																		3	4	3	7.31994	6.37277	0.917513	4.23779	57.8937	42.1063
																		3	7	207	9.82997	7.83247	0.829134	5.69087	57.893	42.107
																		3	1	80	6.88378	5.92531	0.902012	2.90276	42.1681	42.1681
																		3	15	27	8.08883	7.05342	0.9264	4.6745	57.7896	42.2104
																		3	5	9	8.2598	7.39019	0.945611	3.48897	42.2404	42.2404
																		3	13	243	7.89081	6.32662	0.822343	4.55232	57.6914	42.3086
																		3	18	268	9.17474	8.01318	0.918361	3.88255	42.3178	42.3178
																		3	15	28	7.83426	6.49776	0.861334	4.5186	57.6774	42.3226
																		3	14	256	7.43929	6.33184	0.909613	3.15093	42.3553	42.3553
																		3	11	8	9.38015	7.81191	0.862546	3.97497	42.3764	42.3764
																		3	2	9	8.79362	7.57466	0.886341	5.04298	57.3482	42.6518
																		3	13	252	5.39156	4.47572	0.883747	2.31746	42.983	42.983
																		3	4	21	8.31096	7.0939	0.897625	4.73682	56.9949	43.0051
																		3	8	46	5.60578	4.72322	0.912074	3.19359	56.9697	43.0303
																		3	17	11	8.34426	7.28684	0.93807	3.59479	43.0809	43.0809
																		3	1	46	8.05807	6.64832	0.846733	4.58213	56.8638	43.1362
																		3	1	19	8.4613	7.14535	0.891663	4.80484	56.7861	43.2139
																		3	3	17	14.2061	12.1273	0.869923	8.0644	56.7672	43.2328
																		3	6	9	7.12501	6.21164	0.913978	4.04165	56.7249	43.2751
																		3	3	80	6.08608	4.92647	0.854558	3.4512	56.7066	43.2934
																		3	8	42	5.76554	4.86428	0.902045	3.26648	56.6553	43.3447
																		3	15	16	7.03065	5.52872	0.821095	3.9815	56.6306	43.3694
																		3	17	14	9.66356	8.45535	0.905811	5.46655	56.5688	43.4312
																		3	18	61	9.92954	8.13239	0.842133	4.31336	43.4397	43.4397
																		3	9	150	9.40787	8.12967	0.892254	5.31944	56.5425	43.4575
																		3	8	52	9.26954	8.08024	0.904394	4.02922	43.4673	43.4673
																		3	2	12	7.67749	6.76479	0.938092	4.33465	56.4592	43.5408
																		3	14	1	12.5041	10.8209	0.876167	5.44743	43.5652	43.5652
																		3	12	28	9.42172	8.04928	0.895074	5.31222	56.3827	43.6173
																		3	12	26	6.80768	5.4183	0.818968	3.83765	56.3725	43.6275
																		3	1	56	5.22442	4.08334	0.825476	2.9451	56.3717	43.6283
																		3	7	26	19.1231	16.9553	0.913679	10.7761	56.3511	43.6489
																		3	3	9	8.89048	7.61045	0.895274	3.88275	43.6731	43.6731
																		3	14	10	5.95922	5.13881	0.927957	3.35588	56.314	43.686
																		3	18	64	11.1456	9.37278	0.88548	6.27607	56.3098	43.6902
																		3	8	18	7.42899	6.40092	0.911376	3.24705	43.7078	43.7078
																		3	14	255	11.67	9.80827	0.862777	5.10225	43.7211	43.7211
																		3	1	36	8.79247	7.45556	0.884802	4.94756	56.2704	43.7296
																		3	18	273	10.6042	8.73084	0.845987	4.63805	43.7377	43.7377
																		3	1	75	6.69552	5.31821	0.827513	2.92896	43.745	43.745
																		3	1	194	6.72451	5.49338	0.881348	2.95129	43.8885	43.8885
																		3	8	30	6.47614	5.56568	0.900737	3.63101	56.0674	43.9326
																		3	1	61	9.52394	7.8477	0.85111	5.33215	55.9868	44.0132
																		3	18	6	6.30595	5.32232	0.894266	3.53017	55.9816	44.0184
																		3	12	237	11.1623	9.4379	0.850603	6.2457	55.9533	44.0467
																		3	7	16	6.15625	5.32886	0.920434	3.44449	55.9512	44.0488
																		3	1	26	12.7792	10.9578	0.86489	5.63926	44.1284	44.1284
																		3	6	25	10.2544	8.30511	0.859771	5.72018	55.7826	44.2174
																		3	1	48	6.70068	5.33376	0.821298	2.96434	44.2394	44.2394
																		3	1	41	10.3036	8.92109	0.8755	4.5591	44.2475	44.2475
																		3	3	16	3.73387	3.05633	0.884353	2.08106	55.7347	44.2653
																		3	12	167	10.9965	9.51567	0.878763	6.12681	55.7161	44.2839
																		3	9	37	9.27959	7.81303	0.872217	4.1113	44.3048	44.3048
																		3	18	277	8.03522	6.85439	0.909204	4.47504	55.6929	44.3071
																		3	3	29	8.20943	7.1505	0.927361	3.64425	44.391	44.391
																		3	9	57	11.8105	9.88853	0.839406	5.25476	44.4922	44.4922
																		3	8	20	8.09184	6.95457	0.905986	4.47812	55.3412	44.6588
																		3	16	14	8.87665	7.66325	0.89996	4.91008	55.3146	44.6854
																		3	13	245	7.2182	5.99831	0.861402	3.99019	55.2795	44.7205
																		3	8	11	9.98264	8.39953	0.870006	5.51419	55.2378	44.7622
																		3	3	8	4.67419	3.92767	0.905969	2.09642	44.8511	44.8511
																		3	2	7	6.65518	5.77406	0.934704	3.65822	54.968	45.032
																		3	11	29	10.7133	9.32938	0.905237	5.88795	54.9594	45.0406
																		3	10	1	8.80462	7.85688	0.931484	4.83534	54.9182	45.0818
																		3	6	35	7.31066	6.28013	0.907436	3.29652	45.092	45.092
																		3	18	55	7.51999	6.24301	0.864659	4.12172	54.8102	45.1898
																		3	18	23	8.04781	6.95776	0.909029	3.63918	45.2195	45.2195
																		3	13	11	8.86838	7.73757	0.919847	4.85591	54.7553	45.2447
																		3	11	5	7.08354	5.48139	0.791574	3.87375	54.6866	45.3134
																		3	6	18	6.60896	5.52075	0.871464	2.99499	45.3171	45.3171
																		3	15	3	8.5339	7.24702	0.886993	3.87039	45.3531	45.3531
																		3	3	30	5.02822	4.00172	0.841953	2.74707	54.6332	45.3668
																		3	14	17	6.84187	5.9299	0.916065	3.73716	54.6219	45.3781
																		3	3	71	7.75537	6.23855	0.818705	4.23553	54.6141	45.3859
																		3	9	218	8.74418	7.30496	0.854656	3.96882	45.3881	45.3881
																		3	16	263	9.01165	7.61324	0.871235	4.92028	54.5992	45.4008
																		3	9	222	7.22371	6.11762	0.90496	3.94305	54.5849	45.4151
																		3	18	177	7.70603	4.68051	0.599304	4.20327	54.5452	45.4548
																		3	11	28	6.13997	5.16913	0.904941	2.79125	45.4603	45.4603
																		3	9	27	6.65912	5.72996	0.917814	3.63069	54.5221	45.4779
																		3	9	220	10.58	8.4685	0.815623	5.75933	54.436	45.564
																		3	16	20	5.92821	4.95921	0.89057	3.22636	54.4239	45.5761
																		3	11	4	6.23914	5.28039	0.915431	3.39483	54.4118	45.5882
																		3	3	45	9.30122	7.59391	0.84126	4.24352	45.6233	45.6233
																		3	8	212	6.74126	5.66346	0.898668	3.07606	45.6303	45.6303
																		3	13	241	8.37631	6.78987	0.827823	4.54471	54.2567	45.7433
																		3	12	18	10.3872	8.68875	0.870817	4.75317	45.7597	45.7597
																		3	9	47	8.8729	7.54755	0.881864	4.81134	54.225	45.775
																		3	14	39	9.35261	7.88856	0.847193	5.06849	54.1933	45.8067
																		3	12	235	6.40193	5.21062	0.834865	3.46913	54.1888	45.8112
																		3	9	2	8.7282	7.51392	0.89837	4.00113	45.8414	45.8414
																		3	16	10	6.71486	5.66771	0.884243	3.07987	45.8665	45.8665
																		3	6	30	8.48402	6.99966	0.851115	4.59186	54.1237	45.8763
																		3	10	6	13.765	11.5729	0.865272	7.44612	54.0947	45.9053
																		3	12	240	14.948	12.4536	0.843225	6.8791	46.0203	46.0203
																		3	11	31	6.84699	5.86892	0.911564	3.69526	53.9691	46.0309
																		3	15	20	7.03329	6.11022	0.91842	3.79223	53.9183	46.0817
																		3	14	32	11.9522	9.63852	0.820677	6.44395	53.9144	46.0856
																		3	1	189	6.29036	5.19427	0.868522	2.89945	46.0935	46.0935
																		3	9	50	5.027	4.16741	0.891755	2.3183	46.1171	46.1171
																		3	1	15	5.74558	4.54622	0.831859	3.0932	53.8362	46.1638
																		3	1	43	10.0066	8.17019	0.854081	5.38574	53.822	46.178
																		3	15	2	6.03721	5.08728	0.894755	2.79102	46.2303	46.2303
																		3	10	8	8.94676	7.77942	0.903797	4.13762	46.2471	46.2471
																		3	7	206	7.45842	6.23052	0.869907	3.45548	46.3299	46.3299
																		3	1	74	7.11847	5.77911	0.844793	3.30092	46.3713	46.3713
																		3	12	19	9.03549	7.27693	0.832577	4.84438	53.615	46.385
																		3	16	1	6.03625	5.13258	0.90742	3.23565	53.6036	46.3964
																		3	7	4	8.30753	7.19817	0.915348	4.4506	53.5731	46.4269
																		3	18	57	8.35645	6.88889	0.84709	3.88427	46.4823	46.4823
																		3	13	28	6.83425	5.76615	0.892101	3.65234	53.4418	46.5582
																		3	3	12	8.16105	7.03477	0.912678	4.3609	53.4355	46.5645
																		3	15	11	7.32548	6.26231	0.899597	3.41419	46.607	46.607
																		3	15	14	5.44783	4.5832	0.911376	2.53938	46.6127	46.6127
																		3	13	31	7.91955	6.77526	0.89243	3.69199	46.6187	46.6187
																		3	2	15	10.5743	8.99581	0.876266	5.64265	53.3617	46.6383
																		3	9	32	7.91028	6.30828	0.832521	4.22008	53.3493	46.6507
																		3	9	23	7.29099	6.06522	0.873656	3.88605	53.2994	46.7006
																		3	1	5	10.4022	8.90302	0.877682	5.53929	53.2511	46.7489
																		3	7	8	9.63968	8.53012	0.904997	5.13202	53.2384	46.7616
																		3	6	11	6.77944	5.75638	0.895656	3.60613	53.1922	46.8078
																		3	9	45	9.82743	8.16789	0.840701	4.60016	46.8094	46.8094
																		3	16	16	11.5824	9.96477	0.887999	5.42574	46.8447	46.8447
																		3	8	211	7.11464	6.09142	0.924821	3.78174	53.1544	46.8456
																		3	1	184	8.48243	6.96417	0.840364	3.97399	46.8496	46.8496
																		3	13	17	9.67685	8.26657	0.890965	5.13978	53.1142	46.8858
																		3	7	22	9.08285	7.95159	0.906228	4.82123	53.0806	46.9194
																		3	9	149	10.725	9.03719	0.872567	5.03498	46.9463	46.9463
																		3	6	21	14.263	12.7465	0.907957	6.72276	47.1344	47.1344
																		3	2	1	11.4618	10.004	0.896495	6.05547	52.8317	47.1683
																		3	1	77	10.8702	9.10185	0.854209	5.74046	52.809	47.191
																		3	3	27	8.05021	6.6365	0.844208	3.80165	47.2242	47.2242
																		3	1	40	12.3595	10.052	0.840406	6.52212	52.7702	47.2298
																		3	9	223	6.47929	5.24794	0.835467	3.06042	47.2339	47.2339
																		3	1	38	11.292	9.10959	0.832461	5.94864	52.6803	47.3197
																		3	18	3	8.22467	7.06913	0.901701	4.33024	52.6494	47.3506
																		3	10	227	7.10334	5.77137	0.847021	3.7392	52.64	47.36
																		3	11	25	8.87306	7.69398	0.914155	4.66964	52.6271	47.3729
																		3	4	17	6.58447	5.66763	0.922937	3.1209	47.398	47.398
																		3	2	3	5.41365	4.5914	0.904667	2.84617	52.574	47.426
																		3	3	60	6.73298	5.51477	0.86794	3.53846	52.5541	47.4459
																		3	12	38	7.62846	6.61182	0.91974	3.61943	47.4464	47.4464
																		3	2	5	7.86939	6.75347	0.900515	3.73419	47.452	47.452
																		3	11	18	7.13534	5.74935	0.837575	3.38709	47.4692	47.4692
																		3	9	22	7.91568	6.70592	0.896473	3.75976	47.4976	47.4976
																		3	3	4	6.56937	5.57394	0.89017	3.12209	47.525	47.525
																		3	4	6	9.02512	7.81177	0.89812	4.73542	52.4694	47.5306
																		3	10	13	7.65574	6.80648	0.929342	4.01167	52.4009	47.5991
																		3	7	17	9.88003	8.39309	0.874191	5.17711	52.3997	47.6003
																		3	13	26	6.79744	5.71158	0.883358	3.23584	47.6038	47.6038
																		3	7	2	5.06157	3.96686	0.826861	2.65023	52.36	47.64
																		3	3	31	6.9754	5.72605	0.861755	3.32729	47.7004	47.7004
																		3	15	9	6.48196	5.42974	0.916047	3.09368	47.7276	47.7276
																		3	9	58	8.60015	7.45973	0.916968	4.49544	52.2717	47.7283
																		3	1	83	8.68246	7.38844	0.886489	4.53792	52.2654	47.7346
																		3	3	62	7.222	5.69898	0.818544	3.77395	52.2564	47.7436
																		3	14	44	7.76683	6.64873	0.902022	3.70899	47.7543	47.7543
																		3	12	31	9.76887	8.66589	0.927597	4.66679	47.7721	47.7721
																		3	9	28	7.43541	6.3854	0.921268	3.55396	47.7977	47.7977
																		3	3	77	9.53679	8.25577	0.888816	4.56085	47.8238	47.8238
																		3	13	4	8.70726	7.02419	0.828987	4.54272	52.1716	47.8284
																		3	9	29	5.29055	4.24372	0.860667	2.75603	52.0936	47.9064
																		3	3	198	10.8456	9.17149	0.866444	5.19576	47.9068	47.9068
																		3	1	53	9.393	7.49765	0.823642	4.50086	47.9171	47.9171
																		3	14	27	9.99424	8.16775	0.839278	5.20494	52.0794	47.9206
																		3	9	42	7.64463	6.2905	0.874843	3.98034	52.0671	47.9329
																		3	9	24	9.10679	7.75351	0.89939	4.37002	47.9864	47.9864
																		3	1	185	9.21478	7.91453	0.900998	4.79172	52.0004	47.9996
																		3	8	31	9.61318	8.11849	0.886028	4.61543	48.0115	48.0115
																		3	13	251	10.2327	8.42692	0.842933	4.91334	48.0162	48.0162
																		3	12	13	9.06959	7.34084	0.847348	4.71165	51.9499	48.0501
																		3	15	25	8.51427	7.27361	0.888087	4.42141	51.9294	48.0706
																		3	15	257	8.55752	7.03003	0.83856	4.11431	48.0783	48.0783
																		3	14	6	7.61366	6.683	0.926395	3.95197	51.9063	48.0937
																		3	1	10	10.0458	8.63046	0.896829	4.8347	48.1267	48.1267
																		3	3	69	6.91687	5.77091	0.871847	3.58727	51.8626	48.1374
																		3	18	271	7.06399	5.83576	0.85171	3.40209	48.161	48.161
																		3	3	197	6.98833	5.65798	0.844781	3.36603	48.1664	48.1664
																		3	8	39	8.71067	7.35397	0.880932	4.5113	51.7905	48.2095
																		3	1	192	6.76881	5.62519	0.871054	3.26344	48.2128	48.2128
																		3	3	84	6.65129	5.32131	0.850082	3.20716	48.2186	48.2186
																		3	9	41	11.7798	10.1148	0.920565	5.68141	48.2303	48.2303
																		3	1	28	9.86664	7.928	0.832191	5.09729	51.6619	48.3381
																		3	6	34	7.76399	6.56679	0.888299	4.01064	51.6569	48.3431
																		3	16	260	10.6758	9.18793	0.878915	5.16347	48.3662	48.3662
																		3	18	65	7.78569	6.70931	0.911097	3.76791	48.3953	48.3953
																		3	3	11	7.84729	6.51338	0.857351	4.04833	51.5888	48.4112
																		3	11	23	6.07906	5.17296	0.907544	2.9473	48.4829	48.4829
																		3	6	23	9.5853	8.34058	0.89978	4.93727	51.5087	48.4913
																		3	10	15	13.9932	12.1648	0.8923	7.20353	51.4788	48.5212
																		3	3	26	10.9564	9.4754	0.890222	5.63402	51.4221	48.5779
																		3	18	8	8.92574	7.36536	0.855359	4.33701	48.5899	48.5899
																		3	4	27	6.5147	5.68704	0.939249	3.3487	51.4023	48.5977
																		3	9	34	10.1694	8.49146	0.851326	5.22726	51.4019	48.5981
																		3	5	4	7.26346	6.11628	0.882072	3.5306	48.6076	48.6076
																		3	11	13	7.25337	5.9154	0.865182	3.72643	51.3751	48.6249
																		3	10	226	9.03984	7.53018	0.851957	4.6433	51.3649	48.6351
																		3	14	20	6.82222	5.74848	0.891299	3.31858	48.6436	48.6436
																		3	11	20	10.7153	9.09604	0.870028	5.50277	51.3544	48.6456
																		3	3	6	6.35241	5.45442	0.903684	3.26165	51.3451	48.6549
																		3	2	10	7.32202	6.34479	0.928971	3.75937	51.3433	48.6567
																		3	6	141	9.05666	7.17931	0.82536	4.41299	48.7264	48.7264
																		3	11	230	8.95399	7.57909	0.901259	4.36661	48.7672	48.7672
																		3	9	53	9.4795	7.91509	0.868699	4.62399	48.7788	48.7788
																		3	1	12	8.83256	7.16014	0.825123	4.31127	48.8111	48.8111
																		3	6	12	6.86576	5.96823	0.908063	3.35162	48.8165	48.8165
																		3	10	228	7.92107	6.5869	0.863946	4.05339	51.1723	48.8277
																		3	15	10	5.65977	4.88154	0.92619	2.89478	51.1466	48.8534
																		3	14	31	6.73191	5.59025	0.872465	3.44253	51.1374	48.8626
																		3	9	33	7.64576	6.38676	0.894879	3.90939	51.1315	48.8685
																		3	2	195	7.11684	5.76332	0.835137	3.47872	48.8801	48.8801
																		3	3	15	6.32292	5.38168	0.914269	3.2268	51.0333	48.9667
																		3	15	4	9.34085	7.58717	0.850861	4.7664	51.0275	48.9725
																		3	18	71	6.73219	5.47012	0.843793	3.43506	51.0244	48.9756
																		3	3	14	6.39611	5.48098	0.907033	3.13482	49.0114	49.0114
																		3	8	35	6.25292	5.38865	0.917211	3.18693	50.9671	49.0329
																		3	18	36	8.87792	7.60295	0.906833	4.5241	50.9591	49.0409
																		3	11	233	7.11458	5.805	0.829962	3.48926	49.0439	49.0439
																		3	1	17	7.6341	6.21754	0.834042	3.74582	49.0669	49.0669
																		3	14	4	8.1454	6.911	0.886893	3.99837	49.0875	49.0875
																		3	11	36	9.93313	8.4794	0.888125	4.87681	49.0963	49.0963
																		3	13	21	4.77276	4.01533	0.924947	2.42917	50.8966	49.1034
																		3	13	3	7.33131	5.85603	0.832225	3.60014	49.1063	49.1063
																		3	13	247	9.80434	8.34081	0.90132	4.98846	50.8801	49.1199
																		3	4	30	7.34861	6.02779	0.860515	3.73501	50.8261	49.1739
																		3	12	238	7.63644	6.27948	0.827414	3.88033	50.8134	49.1866
																		3	1	23	5.97199	5.14015	0.910544	2.93771	49.1916	49.1916
																		3	13	27	8.28702	7.14512	0.903722	4.0788	49.2191	49.2191
																		3	1	2	6.98273	5.96655	0.900744	3.54568	50.7778	49.2222
																		3	15	29	8.20766	7.22193	0.930008	4.04123	49.2372	49.2372
																		3	1	9	7.78169	6.66574	0.879278	3.83193	49.2429	49.2429
																		3	13	30	5.03607	4.16879	0.878605	2.55581	50.7502	49.2498
																		3	6	29	8.14613	6.56144	0.823471	4.13349	50.7417	49.2583
																		3	17	15	8.55526	7.34778	0.903509	4.34103	50.7411	49.2589
																		3	15	26	8.55687	7.37384	0.907364	4.21546	49.2641	49.2641
																		3	18	175	7.96214	6.40412	0.827619	3.92297	49.2703	49.2703
																		3	2	14	6.20836	5.2049	0.883557	3.05973	49.2839	49.2839
																		3	7	10	11.4867	9.82167	0.853513	5.66398	49.3089	49.3089
																		3	12	22	9.60061	8.01949	0.874753	4.86662	50.6907	49.3093
																		3	3	201	8.08473	6.85237	0.894352	4.09499	50.6509	49.3491
																		3	8	49	11.3754	9.2229	0.817108	5.76066	50.6412	49.3588
																		3	8	210	8.55212	7.14777	0.881672	4.32872	50.6157	49.3843
																		3	8	4	8.97116	7.82697	0.902872	4.43092	49.3907	49.3907
																		3	13	249	11.6968	9.70301	0.831378	5.78092	49.4233	49.4233
																		3	1	105	8.04377	6.57937	0.845608	3.97553	49.4237	49.4237
																		3	15	8	14.0814	12.3221	0.891013	6.96468	49.4601	49.4601
																		3	12	24	7.05324	5.67943	0.825984	3.56072	50.4835	49.5165
																		3	6	13	8.36443	7.19068	0.885253	4.14196	49.5187	49.5187
																		3	13	24	7.78375	6.66398	0.875524	3.92809	50.4653	49.5347
																		3	12	239	9.14712	7.43779	0.844005	4.61537	50.4571	49.5429
																		3	18	4	8.49866	7.38177	0.903616	4.21105	49.5495	49.5495
																		3	18	15	9.14029	7.90163	0.90513	4.52955	49.5559	49.5559
																		3	18	24	6.93869	5.88284	0.889465	3.4398	49.5742	49.5742
																		3	13	242	10.9554	9.26174	0.854858	5.43232	49.5856	49.5856
																		3	17	2	8.34494	7.20409	0.902169	4.13993	49.61	49.61
																		3	10	17	9.05148	7.41944	0.853425	4.56085	50.3879	49.6121
																		3	14	23	8.88513	7.66766	0.895377	4.4763	50.3797	49.6203
																		3	12	32	7.92732	6.73151	0.898846	3.93425	49.629	49.629
																		3	16	9	7.83955	6.75879	0.897984	3.89197	49.6453	49.6453
																		3	6	20	11.1896	9.827	0.900944	5.63414	50.3515	49.6485
																		3	6	19	8.54773	7.04634	0.851971	4.24387	49.6491	49.6491
																		3	14	28	9.84753	8.03811	0.838478	4.88924	49.6494	49.6494
																		3	3	43	7.22128	5.93397	0.850756	3.63578	50.3481	49.6519
																		3	5	2	11.17	9.80442	0.893616	5.62229	50.3338	49.6662
																		3	12	15	9.0744	7.6621	0.868979	4.5669	50.3273	49.6727
																		3	3	2	5.0634	4.20174	0.901357	2.51811	49.7316	49.7316
																		3	8	216	9.6619	7.97786	0.845738	4.80587	49.7404	49.7404
																		3	16	261	8.42846	7.23779	0.894932	4.19268	49.7443	49.7443
																		3	18	275	5.8226	4.91278	0.904166	2.92379	50.2145	49.7855
																		3	10	19	8.49695	6.99709	0.831717	4.26613	50.2078	49.7922
																		3	9	219	10.9462	9.27357	0.856106	5.45513	49.8358	49.8358
																		3	18	32	6.62228	5.31854	0.861472	3.30046	49.8387	49.8387
																		3	6	14	5.23984	4.49479	0.924306	2.62663	50.1281	49.8719
																		3	13	25	8.18932	6.61159	0.825834	4.0847	49.8784	49.8784
																		3	14	2	10.4998	8.90823	0.866366	5.23813	49.8881	49.8881
																		3	11	231	10.8781	9.11311	0.864856	5.44433	50.0484	49.9516
																		3	17	16	9.34194	8.27368	0.920857	4.67516	50.0448	49.9552
[truncated: 7 more columns]
