# Supplementary material for: PomX, a ParA/MinD ATPase activating protein, is a triple regulator of cell division in Myxococcus xanthus
Source: eLife. 2021 Mar 18;10:e66160. doi: 10.7554/eLife.66160 (PMC7993993; doi:10.7554/eLife.66160)
Supplement: Figure 4—source data 2. [file elife-66160-fig4-data2.xlsx]

## Sheet: Figure 4-source data 2
Source data for Figure 4B
SA3146												SA9720											SA7014											SA8240											SA8268
frame_no	cellid	ancestors	length	area	width	threshold_spot	background	cell_signal_int	cluster at			frame_no	cellid	ancestors	length	area	width	threshold_spot	background	cell_signal_int	cluster at		frame_no	cellid	ancestors	length	area	width	threshold_spot	background	cell_signal_int	cluster at		frame_no	cellid	ancestors	length	area	width	threshold_spot	background	cell_signal_int	cluster at		frame_no	cellid	ancestors	length	area
1	2		6.77767	5.54577	0.851244	2155.65	1788.7	429470	3.23672			1	3		18.0604	15.5509	0.872315	712.47	609.717	152392	8.00171		1	1		8.56793	7.38221	0.890094	10607	7635.14	2009865			1	1		10.5997	9.01511	0.869012	1626.87	1263.66	326059	4.77373		1	3		38.2055	34.1681
1	3		12.2301	10.2962	0.863611	2333.61	1877.8	662959	1.49581			1	4		53.0134	45.9427	0.868598	714.105	592.605	892957	35.6243		1	2		7.08919	5.87403	0.85752	9611.06	7453.47	1134357			1	2		9.32818	8.11071	0.899582	1975.09	1405.7	665590	1.20179		1	5		7.85502	6.74292
1	4		7.31726	6.31941	0.899472	2375.45	1985.93	356725	5.77283			1	5		12.4033	11.068	0.910533	713.033	594.038	175697	6.59317		1	3		9.07246	7.60507	0.859827	9781.18	7474.82	1650456			1	3		9.16344	7.674	0.855653	1763.56	1308.75	346652	5.8339		1	9		6.29392	5.13776
1	5		4.56287	3.71199	0.857287	2308.83	1844.92	332335	2.26687			2	2		17.0428	14.8656	0.87766	658.659	556.266	164580	6.1148		1	4		21.8356	19.0229	0.890988	9492.45	7359.88	3922729			1	4		7.51101	5.95511	0.814105	1936.15	1364.15	338163	6.00104		1	10		7.81595	6.838
1	7		9.87182	8.42285	0.880243	2454.56	1904.39	544207	8.11359			2	3		11.1072	9.24687	0.859215	636.893	531.072	129255	5.62265		1	5		2.38492	1.86164	0.905862	9308.02	7729.99	219826			1	5		6.40236	5.29877	0.867396	1990.74	1349.23	493044	2.89611		2	1		14.581	12.7787
1	8		9.83829	8.43064	0.872654	2676.35	1941.5	1166706	0.980085			2	4		5.90094	4.95624	0.887178	568.886	502.843	19036			1	6		11.4633	9.51233	0.847247	9862.51	7441.93	2443271			1	7		8.29217	6.73227	0.83902	1579.65	1335.23	210606	4.4937		2	2		10.527	9.17549
1	9		7.04665	6.13903	0.898472	2605.1	2016.16	540579	0.74163			2	57		11.2902	9.44341	0.855787	651.543	568.056	54869	4.75169		1	7		9.00463	7.46032	0.85954	11070.4	7853.67	2236716			1	8		6.2124	5.13685	0.881677	1877.33	1350.77	246413			2	3		24.8158	22.0984
1	10		4.17281	3.47514	0.901116	2552.79	2050.04	336389	1.87219			2	58		11.6042	9.88537	0.885826	678.169	569.694	103893	7.46657		1	8		15.5806	12.948	0.837339	10341.2	7486.99	3891778			1	9		9.88478	8.06178	0.834413	2529	1400.48	913579			2	4		9.36756	8.17447
1	11		8.41502	7.2703	0.900268	2223.05	1928.19	446720	1.71427			3	2		6.29533	5.24285	0.884594	724.06	630.79	35852	1.76955		1	9		8.79885	7.37048	0.864294	10195.3	7591	1884562			1	10		4.73447	3.76279	0.867094	1775.57	1391.08	154236	2.40711		2	5		1.81899	1.66294
1	12		6.0648	5.0774	0.889639	2126.34	1888.1	126133				3	3		7.51676	6.34845	0.897078	702.44	635.19	18629			1	10		10.844	8.84348	0.851775	11062.8	7710.13	3072809			1	11		4.01675	3.28755	0.885848	1839.22	1350.6	149129			3	1		11.0802	9.32516
1	13		3.32071	2.60314	0.870526	3085.26	2186.81	576916	1.32892			3	5		9.88175	8.60677	0.917178	738.518	627.02	104431	5.71333		1	11		6.91314	5.70856	0.855291	9127.58	7231.38	966209			1	12		13.4234	11.2837	0.86025	1768.09	1358.86	459298	2.11396		3	3		5.25572	4.23686
1	14		7.46387	6.21519	0.88521	2507.02	1880.95	644194	0.245874			3	59		6.87604	5.73951	0.872506	778.998	641.723	91277	4.57283		1	12		11.0854	9.22805	0.84774	10348.1	7682.44	2530355			1	13		21.7689	18.5477	0.867723	1893.86	1327.65	1081096	5.51037		3	4		9.41313	8.17945
1	15		5.76726	4.74966	0.863446	2312.21	1876.31	294498	2.32565			3	60		31.6574	27.6204	0.882439	725.059	609.428	318294	1.37619		1	13		11.668	9.61902	0.849353	9730.76	7693.46	1911437			1	14		4.99461	3.9251	0.833319	1500.67	1269.05	80841			3	6		12.1955	10.3537
1	16		7.36743	6.18288	0.874612	2375.81	1957.76	763395	4.63831			3	61		64.137	55.8	0.881272	739.131	618.464	755386	0.336632		1	14		8.17867	6.83764	0.878934	9278.11	7328.43	1270012			1	15		15.0665	12.7212	0.878815	1667.37	1400.81	529380	12.5183		3	9		24.035	21.3268
1	17		8.10639	6.99279	0.896851	2814.52	1960.63	1107372	1.11989			4	2		13.9286	11.7418	0.859741	716.195	624.597	90423	9.45695		1	15		11.6159	9.88727	0.866844	10389.8	7286.69	3346798			1	16		6.19058	5.11084	0.870922	1738.24	1426.8	136949			3	10		17.1326	15.1737
1	18		7.95291	6.67804	0.881563	2319.26	1914.1	481207	5.27461			4	3		17.8267	15.5547	0.887156	720.053	601.842	186995	5.92123		1	16		12.3677	10.8978	0.907668	10507.2	7203.52	3737967			1	17		17.5573	15.1257	0.874573	1882.18	1424.1	629107			3	13		7.76418	6.88497
1	19		4.31714	3.62611	0.899236	3357.52	1960.91	614605	2.90959			4	5		10.2211	8.68778	0.87928	715.981	595.159	132330	7.35753		1	18		5.89136	4.93188	0.890219	10326.5	7306.28	1428532			1	18		6.60495	5.28494	0.856321	1810.35	1456.41	173679	2.13374		3	14		14.9129	13.2178
1	21		12.6699	10.8672	0.893494	2207.63	1844.36	656644	1.3573			4	6		10.4825	9.13275	0.896436	692.666	581.791	120763	7.57304		2	1		7.87005	6.5384	0.855934	7889.38	6493.96	853701			1	19		5.86614	4.95765	0.894875	1928.35	1416.42	474366	4.32683		3	16		6.93159	6.00295
1	22		9.76775	8.44001	0.896811	2186.98	1882.92	497179	1.2714			5	3		25.4508	22.757	0.902971	721.514	605.74	295975	0.3142		2	2		6.20265	5.38534	0.915541	8717.36	6740.67	872257			1	21		7.62153	6.40796	0.88106	1638.98	1319.18	325654	4.14632		3	17		12.1365	10.3623
1	24		7.86513	6.69071	0.897041	2557.27	1889.15	649840	5.99301			5	4		19.2184	16.4358	0.868609	736.369	610.192	172549	8.1244		2	3		7.80817	6.58931	0.874654	8759.15	6835.8	1221444			1	24		7.03711	5.79546	0.861326	1518.83	1287.26	121055	5.43448		3	18		16.1213	14.4066
1	25		3.45303	2.73879	0.858686	2390.2	1859.57	172912	1.99833			5	5		5.05137	4.09312	0.856293	665.368	596.032	17133			2	4		11.4626	10.0865	0.898994	10857.9	7051.45	3944189			1	28		2.68609	2.07366	0.871368	1618.37	1302.22	55638			3	22		8.87278	7.50508
1	30		10.0193	8.60539	0.894235	2734.67	1848.66	1161259	1.93979			5	6		27.3682	23.5838	0.871264	705.719	593.105	332289	12.6615		2	5		10.5205	9.01894	0.881265	9122.11	6910.33	1748754			1	30		7.66216	6.40779	0.867769	1805.81	1361.79	264934			3	23		10.8977	9.32744
1	33		5.1738	4.26227	0.88371	2291.39	1844.28	261952	3.67472			6	3		15.1918	12.9662	0.881528	722.755	613.721	146036	9.71957		2	6		6.58959	5.70355	0.893015	14470.2	7334.48	4086870			1	123		7.30049	5.98612	0.845004	1670.02	1319.23	172162			3	25		8.13257	6.92861
1	36		7.55996	6.37732	0.886489	2085.11	1824.85	189296	2.66621			6	4		21.0382	18.1532	0.880735	764.146	614.264	349559	8.95297		2	7		10.2171	8.71213	0.886807	9602.02	6754.68	2410986			1	124		6.60037	5.50521	0.881506	1681.98	1360.12	159313	1.60586		4	2		8.28077	7.01112
1	38		2.96702	2.2869	0.872736	7089.22	2485.85	1598924	1.99309			6	5		17.5228	14.907	0.86299	749.413	611.252	229624	7.10185		2	8		10.0181	8.37879	0.850321	9686.05	7018.1	2212886			1	125		5.16039	4.14972	0.858833	2109.24	1390.7	299673	3.06482		4	6		16.397	14.2602
1	39		8.32202	6.70627	0.846407	3201.42	2235.19	1887485	3.28736			6	6		26.1784	23.39	0.903481	746.332	611.149	535235	13.6642		2	9		7.16411	5.88147	0.857502	9454.64	6825.9	1643183			1	126		4.48688	3.60499	0.845	1682.32	1442.62	80547	2.22568		4	8		23.3688	20.7824
1	40		6.44191	5.2573	0.852268	1998.06	1770.76	120034				6	7		27.2193	23.2307	0.860402	705.555	584.152	421516	8.5818		2	10		7.84923	6.58994	0.871969	10157.2	7015.58	2293530			1	127		5.2654	4.2624	0.844999	1769.02	1440.98	98053			4	9		7.40787	6.07078
1	44		4.82776	4.01525	0.895156	3017.84	1921.32	890032	1.92688			6	8		13.4684	11.1192	0.834256	705.547	597.905	96896	5.24578		2	11		4.70077	3.88571	0.890221	10301.2	6922.42	1141044			2	5		11.1369	9.4507	0.874845	1636.6	1332.87	263433			4	11		3.68148	2.8889
1	47		8.6232	7.00036	0.83341	2043.99	1808.06	262799	4.71119			7	1		14.4444	12.4068	0.87733	665.171	569.904	103811	7.42778		2	13		6.96245	5.81164	0.880523	9317.96	6797.31	1370977			2	7		5.21664	4.33093	0.885532	2760.55	1437.57	612240	1.11713		4	12		10.436	9.01458
1	122		3.17822	2.55577	0.898468	3311.36	2095.38	621432	2.22294			7	4		25.1828	21.7106	0.868849	717.526	599.72	382325	14.2801		2	14		4.61984	3.62322	0.855173	7349.73	6557.64	250200			2	8		6.39331	5.28383	0.872518	1652.49	1344.77	140483			4	15		13.0042	10.9138
1	123		8.71059	7.16564	0.835701	2124.3	1831.3	462622	4.54098			7	6		14.6004	12.5214	0.876986	700.408	581.889	140936	5.14714		2	15		5.66806	4.7832	0.898254	10070	6705.76	1573741			2	10		5.45922	4.50766	0.877234	1801.51	1393.1	218194	1.84181		4	16		10.3919	9.26027
2	1		23.318	20.7771	0.897644	2291.25	1836.12	2017628	2.25438			8	1		15.4277	13.2491	0.881779	740.472	612.067	206777	4.60928		2	20	12	5.1568	3.99247	0.823116	9473.24	6890.87	969080			2	11		7.71289	6.33351	0.857974	1751.36	1333.49	273948	1.91897		4	18		8.09421	6.96339
2	2		6.86411	5.79312	0.884754	2228.02	1793.6	538827	4.04347			8	2		9.04365	7.50977	0.861487	750.947	621.204	121412	2.4557		2	19	12	5.57261	4.43534	0.827562	11769.8	7026.18	1988968			2	12		2.77727	2.14827	0.852886	2153.93	1430.9	172321	2.22326		5	1		19.9937	17.4305
2	3		5.26961	4.35181	0.878196	2228.73	1848.61	263412	2.31376			8	3		25.7844	22.4305	0.881483	714.98	606.607	344272	16.9592		3	2		13.386	11.377	0.867624	9317.13	6310.6	3570137			2	15		5.27217	3.28673	0.661443	1814.07	1335.78	146608			5	2		26.8079	21.1332
2	5		3.63555	2.99662	0.910659	2358.61	1978.57	208204	1.83156			9	2		10.7812	9.27244	0.886263	680.796	576.697	89274	3.6954		3	3		8.37423	7.12658	0.862701	10707.9	6412.69	2875990			2	18		25.5895	21.2047	0.835089	1900.76	1349.04	1429830	3.70684		5	3		2.33564	1.75617
2	6		8.03897	6.85717	0.892972	2654.73	2019.3	1010540	2.39426			9	3		45.6557	40.0856	0.875947	700.31	582.536	593446	13.24		3	4		17.7244	14.9833	0.84452	8677.4	6398.73	3643987			2	21		10.2198	8.4785	0.854606	1752.99	1297.96	373596			5	5		15.6732	13.9305
2	8		7.8969	6.72615	0.894445	2355.3	1927.6	491038	0.848115			9	4		8.88228	7.58373	0.879597	672.198	583.395	54385	5.40974		3	5		11.4231	10.0293	0.90085	9520.4	6635.57	2636100			2	22		7.14474	5.90715	0.863809	1829.64	1338.78	304985	2.99849		5	8		18.6849	16.0122
2	9		7.26105	6.14249	0.904874	2103.34	1824.75	353403	5.4731			9	5		3.37469	2.74532	0.891567	684.182	590.881	18137			3	6		11.9131	10.2343	0.86558	9776.39	6410.05	3469567			2	23		9.12939	7.71549	0.879535	2162.95	1403.76	872587	0.949332		6	5		28.5829	25.4406
2	10		8.79368	7.73604	0.917194	2477.42	1924.59	580781	1.79983			9	6		7.51576	6.35913	0.886386	676.12	588.917	39243			3	7		4.57308	3.29014	0.786704	9753	7019.83	567259			2	24		5.18083	4.24908	0.871276	1568.18	1330.2	86763	4.28256		6	6		9.44947	8.48498
2	11		4.7846	4.00365	0.900819	2251.88	1888.39	158458				9	7		21.6124	18.0692	0.847417	684.341	566.619	269891	6.27802		3	8		6.52335	5.31584	0.859858	8350.52	6439.55	1037574			2	25		4.89157	3.98306	0.850293	1784.75	1333	173087			6	7		10.5075	9.07841
2	12		6.20408	5.1128	0.872791	2254.77	1869.9	287578	3.21868			10	1		8.69098	7.4981	0.885205	713.016	621.029	53271	4.30197		3	9		6.66686	5.69039	0.901176	10190.5	6573.55	1563379			2	26		6.25567	5.17568	0.881762	1634.05	1362.74	117614			6	8		10.6148	9.35439
2	13		6.12884	5.04276	0.867092	2766.3	1790.12	668938	4.88532			10	2		18.1534	15.1918	0.850373	730.975	618.288	151496	6.60717		3	10		4.56334	3.75001	0.887164	9126.44	6482.46	859691			2	27		3.95214	3.15055	0.874548	2103.02	1426.14	242076	2.33717		6	10		12.8635	11.2002
2	14		8.54251	7.07288	0.844669	3251.99	1952.14	1792367	3.63212			10	3		9.49951	7.90914	0.850705	703.679	615.584	48080	2.15874		3	11		2.90514	2.33075	0.87846	9311.33	6820.9	606731			2	28		3.23307	2.57336	0.869387	1783.95	1402.03	91929			6	120		1.95	1.46073
2	15		30.3132	26.58	0.88563	3837.58	1872.25	8957147	12.3522			10	6		6.39458	5.35103	0.873754	713.494	621.67	35001			3	12		9.54316	8.05107	0.868763	9024.63	6611.25	1579313			2	31		8.46239	7.16424	0.877089	2558.26	1545.01	1029726	1.56938		6	121		30.9774	27.058
2	16		8.35816	7.22694	0.906652	2201.36	1833.25	282027	5.03316			10	7		16.0599	13.7141	0.87063	734.467	621.153	175950	5.15505		3	13		17.643	14.9673	0.857687	8389.57	5933.79	3690762			2	37		4.26746	3.32852	0.85818	2731.95	1500.8	374786	3.57503		7	1		13.6503	11.6142
2	17		3.55176	2.93233	0.921362	2577.48	1881.89	443789	1.23009			10	8		10.9399	9.37677	0.888113	736.255	623.265	141409	6.00408		4	1		4.73956	3.92934	0.888586	8840.68	6532.15	779606			2	38		2.83068	2.1522	0.857323	1593.86	1360.16	37625			7	2		13.862	11.5799
2	19		7.10273	6.09649	0.905066	2749.75	1891.05	472326				10	9		17.7046	15.3488	0.888843	737.934	614.543	198985	3.58652		4	2		4.90169	4.17402	0.90236	8601.11	6790.81	599513			2	39		12.8971	10.6361	0.837897	1707.3	1285.52	419015	11.3142		7	3		16.2135	13.691
2	20		8.992	7.58052	0.858885	2121.38	1772.5	581893	3.71565			10	10		11.3063	9.70295	0.880404	736.995	604.035	131172	4.89549		4	4		7.78867	6.62112	0.884398	8233.51	6461.86	1093995			2	41		12.7005	10.822	0.872749	1844.21	1343.43	534106			7	6		27.9745	24.5095
2	24		4.32604	3.54925	0.889822	2685.95	1881.17	673788	2.02675			10	63		7.19484	5.93011	0.842975	727.118	641.223	33691			4	5		10.622	9.09506	0.879067	8714.2	6887.14	1473158			2	52		6.75125	3.37618	0.53531	1505.03	1253.49	98190	5.71383		7	7		19.6231	16.6874
2	124		10.5736	8.96203	0.875003	2264.7	1867.31	414457	5.90217			10	64		4.48547	3.60338	0.845	759.542	651.551	34694	2.56319		4	6		6.27548	5.33282	0.893109	9808.23	6918.1	1512827			2	58		6.94255	5.66088	0.855241	2867.61	1366.68	925264	5.0057		7	8		27.3511	24.4747
2	125		2.56057	1.98184	0.845	3332.42	1998.99	470427	1.26834			11	1		9.595	8.2515	0.892555	651.13	574.576	39357			4	7		14.2497	12.5672	0.902329	10647.5	6558.04	4890212			2	63		6.17849	5.0234	0.858691	1717.4	1317.14	214568	4.14763		8	1		19.873	17.4674
3	1		4.064	3.3386	0.876524	2197.19	1768.42	178005	2.66202			11	2		15.6832	13.661	0.886831	696.623	579.78	183607	9.21724		4	8		2.39643	1.86837	0.876013	10410.3	7351	448904			2	66		5.91071	3.73549	0.713379	1433.48	1265.37	44734			8	2		6.26739	5.19716
3	2		5.22419	4.42887	0.899929	2361.97	1824.48	295804	3.45337			11	3		12.2923	10.4318	0.870169	673.334	574.941	88182	9.13958		4	10		9.66603	7.8044	0.842326	10830.8	8266.53	1045478			2	68		9.22524	7.74542	0.866257	1909.72	1290.65	526765			8	3		14.0816	12.5398
3	3		6.40502	5.48569	0.905532	2020.53	1819.72	119389	4.17141			11	4		13.2591	11.4337	0.876827	691.41	583.217	127143	8.37036		4	11		7.84502	6.31967	0.809077	13304.9	7979.72	2776509			2	69		2.99067	2.29534	0.851422	1667.22	1399.75	50725			8	4		6.91428	5.94498
3	5		10.1048	8.48694	0.866542	2610.4	1871.59	922425	4.70353			11	5		15.037	12.8908	0.882208	671.174	559.243	157680	7.21704		4	12		16.878	14.4841	0.864454	9589.73	6646.3	4226948			2	70		3.58844	2.81611	0.847753	2396.5	1443.13	299911	0.518126		8	7		8.28341	7.25426
3	6		9.06462	7.58389	0.861171	2089.55	1783.04	425873	7.79834			11	7		8.89253	7.5368	0.886823	661.722	580.71	41277			4	13		6.43736	5.38549	0.892421	9435.7	6878.34	1232406			2	138		4.95323	4.00214	0.845076	1712.27	1362.42	211348	2.94649		8	8		9.52823	8.04356
3	7		9.48273	8.10703	0.88897	2311.03	1899.74	359990	5.54253			12	1		10.9469	9.40004	0.877361	672.276	579.027	69370	4.93635		4	14		3.92904	3.2431	0.89092	9900.35	6691.89	990956			2	139		7.91613	6.56066	0.848014	1636.99	1350.19	175111	6.66362		9	2		14.0008	12.2324
3	8		5.87949	4.97044	0.909797	2486.72	1947.33	489691	2.56415			12	2		16.5574	14.3484	0.880452	697.976	587.247	189508	11.8179		4	15		18.7455	15.9088	0.861518	8961.76	6529.19	4002358			2	140		6.51992	5.23922	0.855508	1648.54	1320.95	153468			9	3		9.76715	8.2018
3	9		4.4397	3.64472	0.882976	2558.45	1879.99	619814	2.50647			12	3		17.9784	15.1557	0.851579	726.291	591.342	320238	11.4645		4	16		9.05886	7.74107	0.867628	10626.6	6681.29	3008193			2	141		6.281	5.17681	0.868858	1513.66	1309.22	105421	1.81921		9	4		7.70138	6.74938
3	10		6.79405	5.85199	0.913294	2174.99	1902.42	206593	4.47727			12	4		2.63653	1.93327	0.820617	709.37	620.749	11056			4	17		5.88212	5.00845	0.898045	10510.9	6824.09	1936024			2	142		6.12759	5.10575	0.885545	1716.09	1336.91	166180	2.04813		9	8		7.43513	6.44284
3	11		5.95517	4.88037	0.881745	2165.71	1872.76	162704	1.55565			12	6		9.4447	7.91246	0.86603	669.486	566.861	61038			4	18		20.4432	18.1395	0.893411	9225.67	6466.94	5407413			2	143		17.9034	15.314	0.868978	2100.67	1318.96	1442912	17.2218		9	9		7.96914	6.86016
3	12		7.31251	6.19335	0.896404	2384.31	1773.09	556534	0.925761			12	7		9.31477	8.16587	0.916903	677.102	566.935	86800	4.17254		4	19		7.90162	6.52768	0.850259	10731.6	6743.25	2790688			2	161		7.28078	5.96434	0.851974	1785.18	1447.24	188809	1.6336		9	10		16.518	13.8068
3	13		5.93421	5.08386	0.91146	2454.64	1920.46	993559	0.778312			12	65		9.63823	8.00949	0.860466	706.194	594.732	113215	3.54225		4	20		5.96227	4.89353	0.86991	9229.06	6660.19	1189947			3	1		10.3935	9.06779	0.893329	2050.21	1432.5	692531	0.862078		9	11		10.2371	8.3279
3	14		2.42607	1.81945	0.858392	2731.37	2004.91	321406	1.43408			12	66		17.351	14.6063	0.858599	672.303	556.157	135593			4	21		12.8529	11.1273	0.882975	11151.7	6677.45	4965392			3	3		15.3882	13.1416	0.870057	1670.47	1371.75	409424	10.7588		10	1		6.53672	5.98126
3	15		4.3971	3.64729	0.910104	3169.11	1897.76	594648	0.7373			13	2		30.2831	25.9844	0.864325	692.099	580.511	338884	26.42		4	22		10.4172	9.04418	0.898988	12363.3	7275.38	3993367			3	4		6.62298	5.57325	0.881797	2183.93	1400.57	641617	3.11641		10	3		13.5487	11.7674
3	126		7.89667	6.57018	0.841088	2138.3	1851.11	249408	5.78742			13	13		7.58681	6.44898	0.890513	705.956	610.527	53687	4.88236		4	23		15.3092	13.134	0.876295	9131.29	6560.74	3867189			3	7		5.06353	4.26396	0.889548	2069.55	1394.84	358542	1.41996		10	5		23.4706	20.6488
3	127		6.1499	5.01291	0.845125	2286.71	1884.44	294523	2.48864			13	21		10.5546	8.97594	0.882581	695.027	587.194	74369			4	24		15.3161	13.2033	0.872302	10025.2	6471.34	5074648			3	12		3.11411	2.42349	0.868883	1832.37	1503.42	49720			10	6		5.70643	4.75336
4	3		6.67459	5.61681	0.87809	2078.05	1754.36	312041	1.80778			13	22		9.16299	7.82074	0.877841	731.837	592.261	153551	4.50493		4	25		13.4909	11.366	0.853482	9129.49	6223.07	3316926			3	15		13.4235	11.7369	0.892594	1923.21	1386.77	717030	2.00204		10	7		7.55844	6.19792
4	4		5.37205	4.44645	0.883316	2418.12	1874.52	483647	3.16694			13	67		5.35942	4.34649	0.845052	667.7	577.208	28993			4	26		14.1889	11.9341	0.856229	8244.36	6285.29	2573854			3	16		6.89674	5.76528	0.882312	1985.93	1328.77	350112			10	8		7.98463	6.83216
4	5		4.34918	3.51606	0.869402	3250.84	1999.87	1047750	1.89684			13	68		11.6558	9.61685	0.844901	686.605	574.599	127670	6.70749		4	27		8.11172	6.80922	0.870543	8555.13	6321.3	1520414			3	17		3.31858	2.61334	0.839593	1934.72	1345.28	198945	2.87135		10	9		9.97247	8.32938
4	7		7.07663	5.96587	0.881757	2253.91	1802.69	345949	1.03518			13	69		6.40667	5.1913	0.843141	698.16	585.745	56113	4.59474		4	40		14.0286	11.6699	0.845067	8904.5	7014.84	2065768			3	18		8.98894	7.643	0.883977	1762.47	1364.7	443791	8.34829		10	10		9.32101	8.27789
4	8		7.18646	6.09226	0.88738	2716.96	1974.15	1117545	5.84102			13	70		14.2074	12.0744	0.860622	689.46	565.851	170530	8.80873		4	41		17.636	15.0911	0.870042	8865.97	6570.35	3580310			3	19		11.0139	9.37557	0.884371	2795.56	1625.02	1281918	3.37482		11	5		13.5077	11.8424
4	9		5.49471	4.61503	0.898473	2188.93	1877.27	169429	1.82556			13	71		6.09664	4.90082	0.833989	722.226	629.687	34861	2.59739		5	1		14.5028	12.1607	0.844926	8202.42	6179.2	2541287			3	20		6.90171	5.84452	0.889413	1768.89	1403.93	256492	4.65091		11	6		15.1009	12.8935
4	11		6.05594	5.03264	0.880017	2030.86	1770.99	198747	3.73265			13	72		23.8501	20.2615	0.853966	721.992	612.414	184823	6.78608		5	2		28.3364	24.4882	0.868418	9217.39	6349.54	6413491			3	23		6.18394	5.16322	0.885335	1728.79	1352.82	217096	1.16953		11	7		7.99268	6.78211
4	12		4.81613	4.24293	0.933041	4033.61	2249.11	982838	2.18149			13	73		15.7316	13.4422	0.873372	726.107	622.487	133638	8.95817		5	3		10.0984	8.67369	0.87569	12088.1	6743.6	4410463			3	24		14.1497	11.6802	0.835896	1842.64	1370.81	571527	5.08108		11	8		1.78987	1.32303
4	13		6.66418	5.72047	0.888122	2455.03	1895.64	531491	2.49816			13	74		21.9141	18.3368	0.842926	735.18	617.143	191449	6.2313		5	4		6.35367	5.5405	0.913407	9059.67	6894.04	1020272			3	25		8.0564	6.8458	0.891502	1875.03	1446.21	254546			11	9		4.89267	4.13932
4	15		6.94194	5.75344	0.878573	2583.72	1840.66	538481	4.78919			13	75		7.74438	6.21658	0.818964	747.037	670.31	18539	3.32405		5	5		10.6865	9.36077	0.88931	10682.4	6443.69	4075140			3	27		3.66792	2.78736	0.838302	1733.75	1465.29	66519			11	10		1.95116	1.36481
4	16		6.80951	5.72114	0.875951	2342.22	1843.49	364279	5.04209			14	4		7.12864	6.04772	0.891261	720.475	614.791	66353	2.12772		5	7		8.45953	6.97689	0.854465	9686.51	6388.14	2122773			3	28		4.36146	3.48953	0.856434	1720.56	1495.19	59035			11	11		18.2063	15.4914
4	18		3.98749	3.31319	0.909266	2645.24	1956.55	464134	1.67114			14	5		9.59925	8.12628	0.868895	699.925	613.974	45176			5	8		10.023	8.57775	0.878393	10057.5	6408.38	2919905			3	29		5.47674	4.52492	0.894932	1946.95	1490.58	349526	2.4127		11	12		21.5438	17.3994
4	20		4.44427	3.53192	0.864082	2262.3	1853.58	255325	2.1765			14	6		12.9738	11.5822	0.907495	735.102	603.119	140975	7.53074		5	9		15.4594	13.0202	0.851643	8189.07	6047.67	3056779			3	31		16.6087	14.0339	0.855613	1838.18	1434.19	527642	8.19306		11	13		14.5813	12.5888
4	21		8.46563	7.27965	0.89045	2378.2	1981.23	763494	1.58142			14	7		5.67762	4.86406	0.896396	702.527	607.248	30170			5	10		6.30919	5.28151	0.895877	8356.28	6261.32	1051379			3	32		7.46168	6.19933	0.867165	1747.67	1318.76	256213	2.33694		11	14		10.2629	8.79471
4	22		7.06193	5.88585	0.880753	2191.44	1859.57	416732	1.52357			14	9		10.4322	9.07712	0.897074	682.963	599.468	51543			5	11		7.63389	6.4438	0.878147	8848.68	5797.2	2185791			3	35		6.34205	5.15841	0.864937	1876.18	1427.44	236966	1.65802		11	16		6.00393	5.01393
4	23		7.07599	6.05194	0.898058	2265.49	1870.92	364506	3.40566			14	10		15.1698	13.0707	0.877653	710.889	603.722	140888	12.2696		5	42		5.40754	4.38357	0.84502	9430.62	6684.34	1049936			3	38		4.61533	3.70373	0.861569	1861.93	1347.13	350996	2.98407		11	17		16.3193	14.5939
4	24		7.1724	6.12277	0.913032	2280.09	1865.62	342029	0.799728			14	12		5.0967	4.25128	0.878991	646.875	560.273	23945			5	43		11.0838	9.18639	0.852921	10133.1	6414.3	3552949			3	39		5.42381	4.56663	0.902628	2114.23	1475.25	261665			11	18		10.8485	9.38734
4	25		11.2336	9.45377	0.854309	2067.9	1852.4	233976	6.18201			14	13		19.3475	16.5927	0.867493	676.329	571.498	154409	10.2123		6	1		6.74298	5.60354	0.867879	8484.72	6534.12	1023049			3	41		4.56433	3.70609	0.875767	1815.73	1462.95	132264	1.67613		11	19		25.795	22.2159
4	26		3.98892	3.24163	0.884391	2363.35	1854.56	390243	1.41773			14	31	8	9.43883	8.27534	0.908686	728.041	626.796	110267	8.65556		6	2		17.37	14.9664	0.869106	9855.21	6572.45	5136938			3	42		3.09867	2.50859	0.906019	1678.52	1420.84	49504			11	20		4.38711	3.60897
4	27		9.35149	8.20907	0.900223	2425.59	1791.61	887590	8.18478			14	30	8	6.99896	5.91695	0.880233	709.495	609.916	41363			6	3		9.0245	7.66758	0.870603	8683.91	6389.52	1619193			3	43		9.40638	7.61308	0.846752	1723.8	1457.85	231509	5.627		12	1		8.58656	7.14748
4	28		7.63505	6.46698	0.893342	2613.41	1886.19	583788	2.65132			14	47		8.8276	7.54041	0.886179	733.626	619.312	102750	3.317		6	4		19.7856	16.7191	0.859163	8866.43	6537.72	4078165			3	44		2.29494	1.6936	0.862136	2120.73	1468.56	92421			12	2		13.8732	11.6075
4	29		7.63689	6.6679	0.909981	3360	1897.17	1315995	6.06985			14	48		25.0242	21.1178	0.855399	709.552	596.213	267894	18.4562		6	5		42.6473	37.3257	0.869472	10000.4	6574.67	14711809			3	45		8.07372	6.69013	0.85909	1840.82	1466.29	242874	6.08108		12	3		11.3709	9.55275
4	30		5.15443	4.31392	0.88436	2805.25	1928.82	802097	2.82249			14	49		1.4054	0.947044	0.825283	669.768	599.985	4048			6	6		12.4664	10.4712	0.854311	9558.33	6303.65	3851206			3	46		3.95784	3.194	0.879556	1669.51	1349.47	84647			12	4		7.13676	5.90701
4	31		15.8018	13.5463	0.879561	2234.1	1828.81	874405	13.4266			14	76		8.55382	7.04585	0.845117	704.731	613.493	46081	6.80983		6	7		10.8265	9.25918	0.878178	8642.33	6335.35	2346946			3	47		3.2894	2.52769	0.835514	2131.86	1481.51	287377	0.842079		12	5		13.4555	11.6759
4	32		3.18588	2.5192	0.880633	2583.78	1935.76	250101	2.39706			14	77		9.6296	8.1877	0.882142	704.765	617.192	47377	7.02621		6	8		14.1913	12.2615	0.877099	9973.95	6576.31	4508948			3	49		3.81521	3.08042	0.880043	2065.81	1424.95	173072			12	6		11.9664	10.0668
4	33		7.63556	6.54299	0.90546	2262.05	1920.95	263708	0.28571			14	78		6.79948	5.61084	0.849404	745.376	632.276	53750	4.05247		6	10		19.1477	16.2506	0.853692	10971.7	6015.59	8146303			3	52		7.84194	6.60146	0.852397	2446.3	1464.41	1302131	2.64995		12	7		13.9691	12.4877
4	34		5.73719	4.89222	0.907813	2311.24	1801.18	354474	0.862473			14	79		10.8425	9.117	0.878045	719.808	626.248	72125	2.70569		6	11		10.6916	9.38086	0.902104	9205.7	6299.84	2621856			3	54		9.33533	7.89968	0.888131	2066.06	1412.67	597920	1.12353		12	8		6.64022	5.50863
4	35		8.15672	6.86345	0.876594	2667.3	1904.48	995366	2.78691			15	1		18.8205	15.7867	0.84889	640.454	558.83	93464	10.4161		7	1		28.6877	24.2858	0.843534	7991.34	6166.76	4520093			3	55		15.9754	13.0607	0.829341	2214.58	1387.16	1200474	7.19308		12	10		6.00868	4.85106
4	36		15.4274	13.6778	0.906769	3142.12	2022.32	2897442	1.26152			15	3		16.6728	14.4383	0.886622	683.857	562.385	146885			7	2		12.4879	10.4353	0.856652	8615.22	6177.85	2288280			3	56		8.73229	7.22364	0.858042	1667.37	1392.67	281024	3.72351		12	13		23.7034	20.2433
4	37		14.826	12.8826	0.891825	2805.33	1830.89	1815270	1.2737			15	4		37.9816	33.2472	0.884255	668.86	555.967	599414	21.1131		7	3		9.95564	8.36843	0.872749	9151.07	5916.95	2810444			3	57		10.6495	8.94799	0.866175	1758.2	1338.91	361408			12	15		16.3291	14.0527
4	38		4.91918	4.01321	0.866482	2832.55	2050.19	1139787	1.57691			15	5		7.83946	6.55461	0.872032	638.686	561.006	31982			7	4		7.30532	6.17366	0.884439	10426.3	6417.63	2259213			3	58		4.81015	3.92648	0.870234	3582.18	1520	978615	3.51532		12	18		8.71249	7.48741
4	40		7.39427	6.21182	0.886033	1991.98	1696.03	304957	5.98358			15	7		12.0077	10.3661	0.889278	662.048	549.698	153533	5.94503		7	5		16.3911	13.8976	0.866676	8257.56	6039.38	3152107			3	59		21.4577	18.4196	0.881025	1636.7	1361.67	1095057	4.74671		12	20		6.32186	5.37635
4	41		5.52158	4.3467	0.819946	2165.61	1809.17	247616	3.61445			15	8		7.35564	6.07707	0.846965	637.714	562.889	29275			7	7		7.82849	6.7512	0.893158	7173.56	6028.77	787915			3	60		5.10742	4.13002	0.862728	1821.12	1354.34	185912	1.45026		12	21		8.24282	6.08689
4	42		5.53871	4.53442	0.880398	2294.64	1814.64	611259	2.49389			15	9		8.79423	7.44611	0.883834	680.843	563.08	89274	5.51535		7	8		5.11161	4.24225	0.901059	6989.81	6023.35	493451			3	61		5.8119	4.63766	0.841173	1471.76	1237.77	125524	2.23916		12	122		16.746	14.3574
4	43		7.01338	6.05545	0.90976	3834.87	2051.57	1194420	3.94912			15	10		10.5112	8.90077	0.872519	638.021	538.863	71940	5.81155		7	9		6.20562	5.21507	0.888165	6743.19	5783.39	482511			3	62		4.13213	3.2316	0.853337	1627.31	1281.5	119264	2.93765		13	2		12.6206	9.99564
4	44		7.62052	6.31707	0.868268	2338.57	1863.3	370354	0.601875			16	1		8.80932	7.65862	0.903443	656.294	554.138	72917	5.38663		8	1		15.204	12.9326	0.860028	8591.11	6307.96	3035428			3	63		8.7234	7.32581	0.877969	1689.52	1313.09	358386	6.27419		13	3		28.4128	25.1093
4	45		6.24605	5.1573	0.884756	2782.23	1866.3	1293539	3.00007			16	2		10.8024	9.21408	0.88872	635.397	543.636	65747	5.89766		8	2		6.21279	5.33245	0.905779	10166.8	6477.97	1731458			3	64		2.7465	2.08631	0.845566	1665.31	1307.53	61574			13	5		25.866	22.41
4	46		13.7443	11.5279	0.862559	1900.29	1713.15	248218	12.0919			16	3		9.03958	7.59444	0.869328	646.19	559.455	44992			8	3		11.3999	9.92307	0.884509	11806.5	6549.66	5756876			3	67		10.5887	8.92533	0.87628	1631.88	1287.62	421545	2.87906		13	12		8.52567	6.9114
4	47		6.59619	5.58046	0.880888	2403.95	1914.34	463431	1.76366			16	4		11.7273	9.93643	0.859522	642.739	558.175	69483	5.93247		8	4		10.9968	9.41367	0.875803	8498.14	6327.99	1937841			3	68		2.27968	1.63732	0.823849	1544.43	1327.06	30303			13	13		12.9619	11.05
4	48		8.6056	7.32185	0.898976	2755.85	1817.33	1117582	2.9956			16	5		5.69878	4.88053	0.91538	641.409	565.008	20692			8	5		15.9623	13.891	0.879968	8803.52	6118.96	3561691			3	69		7.73531	6.45613	0.869736	1497.11	1258.81	201775	1.47319		13	15		6.97463	5.6554
4	49		6.47461	5.52998	0.904669	2339.13	1709.4	624446	2.00915			16	6		7.87625	6.82215	0.894367	685.809	555.926	116582	4.26271		8	6		22.7321	20.0076	0.896734	8567.8	6170.35	4932734			3	144		10.2098	8.48362	0.869121	1795.22	1395.57	325962	5.83229		13	16		11.0338	9.30613
4	50		5.70026	4.74301	0.884233	2276.76	1748.2	430316	0.550559			16	7		13.6014	11.8454	0.891632	664.812	551.049	178160	4.06782		8	7		7.25664	6.16063	0.890424	9638.11	6314.47	2412272			3	145		9.31026	7.68413	0.845001	1740.07	1536.12	111974	1.64432		13	17		26.636	22.9415
4	51		7.30168	6.13852	0.875056	2277.14	1766.38	643080	5.39662			16	8		8.93055	7.49971	0.865675	614.703	549.591	25404	6.64993		8	8		4.15113	3.4913	0.895189	9105.07	6323.07	1046776			3	146		12.7284	10.8746	0.881579	2439.31	1478.73	1215728	1.88983		13	18		17.9933	15.8717
4	52		7.20252	6.09528	0.869434	2276.27	1783.52	503765	0.864436			16	10		3.61817	3.02072	0.90929	638.621	545.714	20055			8	9		5.88765	4.94172	0.899001	8555.45	6214.84	1035838			3	147		8.25971	6.79623	0.84501	1923.41	1657.09	180994	2.31262		13	19		15.7914	13.6996
4	53		7.26636	6.37308	0.918834	3739.33	2134.37	1688703	2.67888			17	4		21.9239	18.3912	0.844462	712.465	577.388	379671	9.59841		9	1		7.16628	6.14349	0.894121	8782.42	6276.39	1436674			3	148		7.04884	5.77401	0.845085	2091.19	1657.79	274373	0.389457		13	20		8.24851	7.01449
4	54		5.11259	4.16147	0.885044	1899.86	1641.87	141584	1.36063			17	5		21.7882	18.5864	0.863684	704.667	566.217	397253	16.9673		9	2		11.3647	9.89428	0.891948	10068.4	6334.88	3778568			3	149		4.27175	3.42525	0.845022	1778.49	1608.74	30186			13	22		17.0148	14.2882
4	128		6.43574	5.25121	0.845071	2253.33	1893.84	464756	2.78051			17	8		9.56206	8.3333	0.905924	689.594	582.682	86583	6.71189		9	3		14.0152	12.3983	0.902308	8127.22	6170.67	2286105			3	150		9.52058	7.86228	0.845103	1767.34	1491.71	129682			14	13		7.10888	5.87791
4	129		10.7618	8.91007	0.844999	2494.83	2047.9	1017689	2.65866			17	10		9.22297	7.98835	0.902943	686.278	580.069	87076	3.17505		9	4		11.351	9.62816	0.862036	8908.9	6190.75	2656668			3	151		36.5861	30.7316	0.845017	1937.55	1562.58	1594030	9.939		14	14		5.81148	4.65178
5	1		6.79117	5.69531	0.880925	2204.49	1796.99	346285	4.08213			17	80		7.58641	6.31114	0.860054	633.488	559.695	27815			9	5		30.5366	27.3208	0.908702	8410.73	6024.26	6825440			3	152		1.70617	1.25704	0.844297	1641.01	1473.08	11775			14	15		15.8493	13.5375
5	2		10.6905	9.14857	0.872589	2750.59	1863.29	1712904	2.86899			17	81		6.02351	4.90332	0.85296	632.242	555.174	23763			9	6		10.5596	8.97804	0.869938	8424.33	6063.21	2023884			3	153		8.64805	7.11896	0.845055	1753.89	1444.34	281437	0.430519		14	16		10.054	8.70727
5	3		7.30803	6.15854	0.879466	2101.4	1823.39	296111	2.75712			17	82		8.28262	6.76451	0.844335	693.939	581.12	70157	2.10642		10	1		10.3155	8.8883	0.880227	8468.62	6522.26	1660323			3	154		15.2919	13.4054	0.897847	1902.17	1394.35	710357			14	17		15.7079	13.3569
5	4		5.88214	4.9844	0.906267	1990.81	1768.06	108502				17	83		12.4558	10.4353	0.875355	673.672	581.901	70064	4.04514		10	3		9.85523	8.40791	0.876821	8163.15	6469.83	1388734			3	155		13.1623	11.3726	0.895815	2093.7	1498.63	1763592	9.23269		14	18		14.7219	12.6923
5	5		6.06924	5.21433	0.905395	2191.39	1929.51	217321	4.40221			17	84		5.3072	4.34839	0.881549	655.72	583.833	18586			10	4		8.49522	7.24722	0.881069	8463.06	6508.83	1312100			4	2		6.8443	5.5979	0.847227	1523.38	1262.43	166325	2.2743		14	21		11.97	10.2451
5	6		4.18168	3.43604	0.886906	2294.2	1813.02	315993	2.08282			17	85		20.7216	17.9901	0.885469	696.18	583.287	292830	3.79307		10	5		10.7599	9.25711	0.880536	11537.7	6674.21	4364121			4	3		14.0143	11.9875	0.869685	2313.86	1359.31	1201623	3.50915		14	22		14.3198	11.9909
5	7		6.17483	5.26101	0.901273	2463.98	1943.11	427469	1.19335			17	86		10.8326	9.13892	0.862314	708.218	576.115	161305	7.78099		10	6		9.58359	7.5137	0.805224	8798.06	6550.56	1535066			4	4		3.2321	2.52906	0.869133	2762.02	1547.39	377835	1.65511		14	24		17.6369	15.1609
5	8		7.17734	6.05832	0.893269	3222.8	2157.45	2668440	1.65811			17	87		4.0471	3.39063	0.910708	670.038	610.177	8841			10	7		9.54193	7.79905	0.834912	9261.85	6843.89	1446490			4	6		8.2137	7.04056	0.894674	1727.92	1363.22	271858	5.82487		14	25		10.553	9.21206
5	9		2.23378	1.72399	0.855011	2785.63	1928.52	211487	1.11878			18	1		11.082	9.58138	0.896756	661.238	562.746	95667	5.32418		10	9		7.44554	6.15218	0.858267	9255.37	6588.72	1696225			4	7		9.59175	8.27944	0.892483	1786.46	1336.99	367769	0.949847		14	28		14.8005	12.7304
5	10		4.9667	4.18898	0.900408	3144.58	2024.02	978463	3.29301			18	2		2.3552	1.85731	0.902097	585.211	524.814	5361			10	10		13.1521	11.3187	0.872154	7531.7	6263.37	1380038			4	8		8.72008	7.65935	0.915939	4095.87	1509.84	2460337	2.2794		14	33		8.35899	5.78867
5	11		8.44227	7.11966	0.868138	2018.6	1774.97	479760	4.02858			18	4		43.9847	38.4748	0.883417	678.246	573.36	476772	26.3655		10	11		6.3138	5.28131	0.875928	8532.78	6100.63	1230676			4	9		11.0229	9.21984	0.858521	2192.39	1380.24	1047349	4.57156		14	37		7.00317	6.06175
5	12		10.591	8.99392	0.883264	2029.45	1824.11	192865	7.07748			18	5		8.21813	6.99131	0.888589	661.884	567.796	45931			10	12		8.78173	7.3828	0.860155	8834.99	6223.72	2049681			4	10		8.80773	7.43171	0.880768	1581.05	1344.33	210855	1.71567		14	42		19.9096	17.2976
5	13		8.14407	6.86371	0.878402	2380.05	1832.79	636862	5.40465			18	6		12.4934	10.6588	0.875125	702.791	572.811	167337	5.39465		10	44		22.6684	19.1899	0.864062	10497.2	6487.81	9087511			4	12		10.8461	9.2997	0.881438	1524.78	1298.29	254933	6.75609		14	45		3.82514	2.87339
5	14		6.03558	5.18391	0.90183	2945.45	2006.4	1021938	1.61709			18	7		9.17684	8.03051	0.912403	654.364	561.94	60193	2.07979		10	45		5.90745	4.97708	0.877014	10956	6877.6	1967148			4	13		7.56485	6.31676	0.871902	1520.56	1341.67	134036	4.02388		14	46		8.59466	7.30273
5	15		4.22795	3.41711	0.873823	2603.26	1915.19	377582	2.45259			18	8		2.05263	1.5651	0.880476	616.874	536.858	8851			11	1		15.0587	13.0032	0.870656	9068.25	6161.07	3690509			4	14		8.37636	7.09875	0.88346	1792.78	1384.26	251877	3.10301		14	47		17.3689	15.1063
5	16		5.74711	4.8428	0.898645	2301.4	1820.6	228215	0.875646			18	88		9.91418	8.31627	0.88221	737.292	665.299	18938	5.43537		11	2		7.50649	6.42556	0.890671	10447.7	6396.02	2390360			4	15		6.84341	5.7049	0.87527	1678.6	1302.09	190314			14	48		6.37118	5.33157
5	17		7.64476	6.50483	0.888293	2123.02	1809.01	515001	4.45989			18	89		16.7396	14.1718	0.869142	686.524	584.768	128803	6.05929		11	3		16.4009	14.0657	0.858203	9975.47	6440.07	5046583			4	16		6.97049	5.68534	0.859817	1674.42	1332.34	214413	2.62377		14	50		11.4946	9.55169
5	18		4.9548	4.07735	0.890767	2218.07	1855.47	176062	1.99585			18	90		38.3654	33.0923	0.856311	684.88	572.809	596018	19.7565		11	4		8.89843	7.86407	0.905846	12473.1	6723.64	4954215			4	17		7.18499	5.93762	0.87434	1565.86	1350.96	106773			14	51		11.2634	9.70694
5	19		5.8577	4.78403	0.84733	2370.71	2006.24	339033	1.34829			19	1		7.69172	6.66669	0.906728	677.761	599.073	35203	3.98826		11	5		9.40347	7.62651	0.8248	10242.2	7169.68	1616227			4	18		3.03001	2.33138	0.870549	2355.38	1458.13	312679	2.53983		14	53		9.1462	7.45564
5	21		9.88819	8.15902	0.862908	2138.53	1818.7	327184	5.53178			19	3		6.02823	4.72797	0.804014	731.682	639.155	33672	2.99184		11	6		23.851	21.2908	0.902851	10873.8	6267.47	9733406			4	19		21.0355	18.1021	0.878649	2015.65	1386.92	1458550	13.0707		14	56		10.3816	8.82682
5	22		4.14862	3.41121	0.903068	2345.37	1872.57	200095	2.25916			19	4		7.08873	6.13148	0.910456	708.411	614.153	42965	2.04522		11	7		21.1573	18.2116	0.873474	10410.5	6594.22	6541709			4	23		10.5502	8.96592	0.863365	1760.5	1356.37	888863	4.49361		14	57		10.8767	9.06148
5	23		3.03876	2.32869	0.859111	2101.19	1771.44	84937	1.86354			19	5		8.54533	7.19139	0.873967	689.706	598.968	49431	5.68084		11	8		7.16056	6.12231	0.893594	9121.3	6530.13	1451078			4	24		6.08218	5.10098	0.90146	1986.96	1472.65	206670	0.496234		14	58		12.7661	10.1545
5	24		18.514	16.5469	0.913762	2682.18	1894.21	2266614	3.34708			19	7		3.61114	2.9238	0.878864	713.258	615.476	19087			11	9		3.506	2.88137	0.879041	12015.3	6721.25	1683424			4	25		5.70673	4.59602	0.850055	1854.15	1427.38	223955	2.34195		14	59		4.9602	4.17085
5	25		3.48206	2.77326	0.875756	3144.96	1929.26	523657	1.55394			19	8		13.0725	11.3475	0.892392	709.339	595.345	103535			11	10		7.76314	6.71412	0.887302	13706.2	6445.38	4929182			4	26		10.6115	8.49986	0.821778	2227.13	1505.32	337871	7.4512		14	60		6.58322	5.63671
5	26		5.52836	4.67464	0.905076	2217.91	1844.42	244633	0.507931			19	9		4.84275	4.02953	0.884612	710.311	592.336	38670			11	11		16.9815	14.7068	0.871213	8661.47	6130.44	3844332			4	27		9.66674	7.81486	0.827045	1994.09	1346.91	508072			14	61		12.2998	10.5519
5	27		8.74452	7.25468	0.838596	2136.87	1852.88	712417	4.4436			19	10		5.14	4.27202	0.872952	667.024	576.859	28367			11	12		10.0034	8.48424	0.872986	10083.7	6215.13	3630407			4	28		13.5993	11.6493	0.874378	1925.51	1369.93	950512	8.58284		14	63		17.3233	14.4536
5	28		7.169	6.12352	0.901823	2205.14	1975.8	166662	1.71269			19	91		14.5872	12.7746	0.900574	732.019	622.87	199336	6.23719		11	13		7.54909	6.40936	0.884482	7856.02	6236.88	900734			4	29		3.94473	3.06347	0.83999	2469.73	1656.59	216943	1.82731		14	65		4.54827	3.02086
5	29		5.64036	4.89144	0.921098	4738.91	2118.97	1447569	2.39749			19	92		8.84478	7.35519	0.878361	751.011	620.97	106081	4.80826		11	14		21.1359	18.1601	0.86751	8529.62	5897.25	4925814			4	31		10.3748	8.45587	0.855921	1852.87	1446.56	454113	7.25065		14	68		10.9555	8.78426
5	30		9.19226	7.66259	0.864814	2318.47	1815.2	1340157	3.25502			19	93		1.87685	1.36792	0.829449	713.311	609.399	10310			12	1		15.5074	13.0276	0.852403	7822.69	5812.74	2680766			4	32		4.61531	3.69814	0.86598	2035.26	1440.39	193373			14	69		13.117	11.1598
5	31		7.96905	6.58282	0.857293	2159.78	1763.23	283935				20	1		9.83002	8.35112	0.867645	654.879	543.269	89094	3.24476		12	2		5.99213	3.55022	0.607012	9675.78	6459.29	977492			4	34		6.70029	5.49969	0.863685	1653.52	1341.54	145652			14	70		8.81564	7.12828
5	32		3.06246	2.44969	0.885854	2735.84	1926.3	247026	1.51243			20	3		11.1357	9.43749	0.860497	635.351	555.681	48921			12	3		5.87984	4.94586	0.868632	10779.4	6472.76	1827626			4	45		17.8807	14.4908	0.819638	1708.93	1327.83	552626			14	72		10.6631	9.16441
5	33		4.57105	3.70918	0.883205	2117.94	1795.17	179556	3.22			20	4		7.28659	6.14363	0.87724	652.616	551.83	49453			12	4		12.6351	8.99424	0.694948	9336.13	6418.84	3024423			4	46		5.18543	4.26321	0.865494	1563.21	1338.59	81848			14	73		9.64013	8.17463
5	34		5.28363	4.22676	0.870259	2147.76	1713.95	195668				20	7		14.057	12.0173	0.868441	667.689	552.533	186530	7.62488		12	5		19.3769	16.5299	0.85588	8685.02	6110.47	4274836			4	156		9.46794	7.81653	0.845056	1730.05	1365.49	250483	2.52429		14	74		13.2763	11.0098
5	35		7.96681	6.58354	0.874432	2441.89	1837.72	628157	4.56686			20	8		19.4444	17.1195	0.891608	696.065	553.777	310901	10.9578		12	6		4.9512	3.41315	0.707886	9008.45	6494.19	642271			4	157		8.08477	6.64452	0.858436	2555.72	1548.95	940106	0.678356		14	76		11.3259	9.43556
5	36		5.04168	4.12208	0.881295	2095.65	1798.5	136734				20	9		12.7441	10.876	0.87866	638.719	540.372	97164	3.89621		12	7		7.99054	6.61257	0.880615	9560.08	7077.94	1231516			4	158		10.1431	8.38737	0.845045	1837.52	1399.43	314961			14	123		13.2434	11.0072
5	37		4.28918	3.54575	0.899786	2210.8	1760.11	218567	3.20475			20	10		2.11201	1.66517	0.881015	628.738	553.594	7363			12	8		6.94005	4.10238	0.616852	9379.73	6716.26	1067279			4	159		3.7657	2.98566	0.845	2075.24	1479.24	184202	3.07087		14	124		12.4371	10.1982
5	38		5.2327	4.29593	0.893591	2309.46	1773.67	360378	0.775001			20	11		23.8974	21.0307	0.884266	651.037	545.914	290349	11.5774		12	9		5.5656	2.97268	0.517605	11261.8	7508.77	1088582			4	160		2.51534	1.92996	0.844999	1595.16	1367.28	33493			14	125		15.28	12.7252
5	39		9.45414	7.63566	0.82676	2053.76	1811.65	201298	2.13976			20	13		9.34525	7.82898	0.873204	627.581	535.38	63807	5.60083		12	10		6.85485	5.79618	0.886622	9516.38	6402.68	1544838			5	1		3.40297	2.7142	0.858549	1563.15	1310.22	98089	1.33912		14	126		23.0616	19.4213
5	40		4.05365	3.19249	0.858015	2303.99	1851.11	235502	1.32376			20	94		11.2608	9.68704	0.891781	638.867	545.298	108615	7.76887		12	11		6.14073	5.08588	0.87365	10927	7246.75	1636615			5	5		21.694	18.6774	0.867748	1385.41	1203.79	286105			14	127		16.7457	13.9674
5	41		15.9587	13.0324	0.836367	2026.99	1710.26	572971	6.14221			20	95		21.772	18.9141	0.884589	657.861	536.159	333962	13.1933		12	12		8.46124	7.32315	0.89921	9285.3	6604.66	1550697			5	7		3.30969	2.55632	0.851003	1590.2	1286.95	73182			14	128		13.213	10.9828
5	42		4.18831	3.33054	0.868398	2118	1872.25	102254	2.15692			20	96		15.2451	13.2042	0.884135	649.304	551.312	114037	6.4884		12	13		10.1795	8.57692	0.861722	8375.99	6237.2	1923634			5	14		10.7511	8.98418	0.859257	1998	1373.02	734086	4.98442		14	129		12.9752	11.085
5	44		6.40256	5.23006	0.852766	2470.62	1778.11	1062381	2.37887			20	97		3.19641	2.43581	0.851951	640.393	565.544	10204			12	14		7.08804	5.9889	0.886776	9267.75	6566.48	1309619			5	16		5.23026	4.28082	0.856947	1618.78	1335.13	132342	1.9113		15	3		8.41182	7.04947
5	45		6.52877	5.40216	0.876372	2186.91	1847.26	433351	4.57386			20	98		15.1352	12.6166	0.848738	672.883	574.814	96579	8.80869		12	15		10.4589	8.64155	0.87038	9641	6847.21	2007877			5	17		6.87734	5.72434	0.872225	1488.19	1298.91	127418	4.39611		15	5		25.2261	21.7477
5	46		7.82469	6.42853	0.863765	1927.3	1687.68	220959	5.80677			21	1		10.2757	8.68672	0.868192	657.175	562.167	63536	4.97242		12	16		7.74629	6.45022	0.864925	11979.1	6948.29	2558945			5	19		11.2915	9.40324	0.853505	1804.44	1369.97	397912	10.8859		15	12		8.0394	6.88777
5	47		9.97187	8.35519	0.872458	2439.96	1748.15	850342	2.79637			21	2		17.7666	15.1578	0.863509	691.691	573.024	197463	10.725		12	17		7.3509	6.09108	0.849092	10906.2	6427.75	2288809			5	21		13.9056	11.7725	0.859795	1790.16	1330.88	535335	3.43391		15	17		2.78226	2.08003
5	48		8.16536	6.50882	0.817358	2392.83	1859.63	416738	7.25019			21	3		5.81406	5.01357	0.923706	666.921	584.974	24727			12	18		15.8375	13.4441	0.868975	8453.25	6312.01	2794367			5	22		8.30429	6.92493	0.860608	1638.28	1359.94	317091	3.76887		15	18		9.5616	8.15919
5	49		5.10456	4.12593	0.860481	2094.48	1737.2	288066	2.9002			21	4		13.7193	11.7322	0.872004	636.321	542.385	94660	4.42475		12	19		15.3492	13.069	0.865612	8999.01	6342.03	3827164			5	23		5.43895	4.57862	0.894098	1471.38	1212.63	123145	3.47475		15	19		11.2702	9.96405
5	50		7.75548	6.52253	0.886752	2027.88	1778.23	240751	1.27286			21	5		8.29034	7.1921	0.906301	674.782	588.632	35479			12	20		16.7264	14.2324	0.8672	8675.22	6093.98	3917649			5	24		11.492	9.86944	0.884424	1998.81	1402.66	628573	7.78897		15	21		19.4223	16.7692
5	51		5.05229	4.149	0.867775	2117.8	1866.68	125022	2.66563			21	6		12.3062	10.6725	0.890037	672.538	560.221	142392	8.40486		12	21		2.52695	1.84724	0.847123	12222.6	7028.85	576488			5	25		7.50211	6.10451	0.850188	1657.41	1315.37	235649	4.98807		15	23		8.67104	7.38749
5	52		10.5219	8.80337	0.870849	2043.09	1784.59	413466	4.7921			21	10		24.7851	21.6544	0.906275	739.351	583.904	497467	15.8946		12	22		21.9339	18.9834	0.879509	9810.6	6112.23	7786329			5	26		8.7651	7.21475	0.858886	1460.42	1265.47	159643	6.75038		15	24		21.346	17.4732
5	53		15.8888	13.2654	0.841535	2213.5	1824.42	526165				21	100		26.8257	23.4189	0.878773	688.362	562.14	357441	22.2739		13	1		11.0309	9.41616	0.878468	10530	6579.18	3217584			5	27		6.91478	5.73149	0.874189	1714.8	1364.71	231954	4.02747		15	34		6.75116	5.23505
5	54		7.46096	6.14033	0.880521	2525.94	1798.6	889645	2.06578			21	99		1.49895	1.04212	0.833295	662.717	575.622	6206			13	2		18.354	15.6665	0.863494	8606.28	6429.04	3527909			5	28		11.2398	9.2039	0.836286	3046.05	1431.87	2056440	5.56363		15	36		25.778	22.1317
5	55		8.01341	6.69017	0.875413	2887.73	1841.4	963149	1.21086			21	101		1.8602	1.40636	0.878832	638.605	547.69	8618			13	3		8.65203	7.39825	0.891899	9811.98	6743.18	2010415			5	29		14.8612	12.8277	0.881897	1589.49	1366.91	497871	3.78368		15	41		9.64248	8.27166
5	58		6.08874	5.10842	0.896381	2202.36	1782.27	269639	5.23127			22	2		4.91413	4.11498	0.881195	690.788	601.777	25318			13	4		13.1907	11.5132	0.899226	13211.5	6801.94	6781143			5	30		7.69647	6.42826	0.872955	1562.4	1303.39	160609	4.22447		15	42		10.4084	8.94953
5	60		7.17251	5.9474	0.88214	2443.32	1750.31	698279	4.69472			22	7		7.30013	5.96839	0.849033	676.31	561.302	56098	4.70746		13	5		7.68916	6.62418	0.883661	9402.42	6542.53	1714251			5	31		7.23289	5.87871	0.840819	1667.39	1405.48	123628	5.00472		15	44		9.9348	8.27682
5	61		7.05093	5.88566	0.876863	2011.33	1700.76	255988	2.20741			22	8		9.38128	7.88287	0.863174	787.671	599.414	245085	7.12187		13	6		6.5168	5.52446	0.893456	8715.78	6608.07	988147			5	33		5.35868	4.24746	0.83781	1694.78	1441.79	73782			15	47		23.7445	19.922
5	62		9.78811	8.5421	0.908616	1933.53	1706.57	272635	3.35963			22	9		9.64051	8.36292	0.900542	667.871	590.605	38656			13	7		16.3967	14.143	0.878316	8654.77	6332.81	3051939			5	34		12.2938	10.2819	0.857378	1710.03	1350.21	492783	5.12956		15	50		9.29359	7.70479
5	68		7.26179	6.05732	0.878327	1928.6	1635.83	260300	1.39827			22	102		5.76401	4.74861	0.864109	662.721	583.662	25660			14	1		13.0268	11.0174	0.865412	7521.25	6160.45	1535211			5	36		12.4625	10.5134	0.875925	2430.43	1426.07	1137135	3.91002		15	51		10.6125	8.90527
5	69		10.2921	8.65548	0.873928	2013.37	1725.43	357774	0.779813			22	103		15.5117	13.4795	0.886275	672.955	577.701	166241	6.7796		14	3		14.153	11.8646	0.890292	8969.42	7215.02	1395291			5	37		15.5284	12.7708	0.810119	2175.7	1378.93	1108097	7.74195		15	53		6.39014	5.29309
5	70		8.23148	6.7048	0.858678	2132.66	1716	410401	3.82389			22	104		3.75536	3.10764	0.902398	655.17	569.71	19137			14	5		7.66753	6.34964	0.860158	10435.8	7700.58	1405871			5	39		8.19458	6.92756	0.884976	1709.35	1370.37	273816	2.68827		15	54		10.012	8.61126
5	130		1.84077	1.37106	0.844452	2377.6	1931.8	139081	1.06194			22	105		19.6305	16.4651	0.847492	712.027	583.013	188090			14	6		6.20333	5.19889	0.89397	9805.04	6655.86	1341992			5	40		7.71953	6.38594	0.862205	1651.07	1370.48	148945			15	55		6.86162	4.61283
5	131		3.86666	3.08522	0.845	2533.21	2003.89	238926	1.61674			22	106		5.77359	4.84774	0.88854	694.143	607.179	32667	2.95304		14	8		7.70408	6.66613	0.896508	9746.48	6648.61	2307992			5	42		4.69233	3.88977	0.893756	2518.61	1449.52	380251	1.5437		15	57		8.89433	5.9639
6	1		3.13879	2.52251	0.887488	2847.65	1833.65	285375	2.40989			22	107		18.7831	15.7554	0.861577	734.68	596.768	232587	8.45018		14	9		6.60765	5.65167	0.897442	10346.1	6801.35	1821151			5	43		12.3988	10.2961	0.858819	1762.67	1336	615697	2.6035		15	59		16.295	14.2083
6	2		7.17906	6.18806	0.895841	2541.64	1846.75	914116	5.4047			22	108		36.5605	31.3928	0.860291	723.273	605.308	726710	7.79731		14	10		12.2404	10.1424	0.837255	8404.9	6792.02	1418491			5	45		7.81977	6.59177	0.879025	1434.76	1261.4	122952	4.86832		15	60		5.90747	4.82688
6	3		5.87233	4.86941	0.876364	1982.03	1630.87	341166	4.46949			23	1		5.12794	4.23079	0.891394	660.129	563.282	34611	3.16345		14	11		7.14743	6.08286	0.891809	8618.56	6612.87	1104237			5	46		3.49026	2.74305	0.876164	1664.24	1314.77	102992	0.60637		15	61		7.21432	6.2759
6	4		9.52067	8.07322	0.884411	2289.29	1692.52	560379	8.03689			23	2		12.9912	11.2705	0.895275	740.022	634.441	89357	5.34076		14	12		4.18121	3.48822	0.897412	9117.69	6747.46	575124			5	47		4.79754	3.81508	0.84196	1820.31	1327.34	176860			15	62		7.56844	6.31003
6	5		8.8162	7.61531	0.884013	2700.49	1825.48	925379	3.09678			23	3		19.352	17.0124	0.898019	722.588	603.306	237529	9.39707		14	13		6.98851	5.60571	0.829439	9357.29	7551.19	722127			5	48		4.22798	3.46955	0.891306	1681.82	1339.15	187794	2.06284		15	64		23.8046	20.6186
6	6		8.22299	7.01509	0.878704	2240.95	1795.54	611999	3.36394			23	4		12.0769	10.0802	0.862884	723.594	628.369	84108	5.17455		14	15		10.8059	9.2443	0.882107	10104.7	6674.46	2926455			5	49		12.3876	10.1636	0.825078	2158.1	1454.97	579248			15	65		9.59461	7.7157
6	7		7.26433	6.30976	0.9034	2160.87	1814.74	282683	4.67038			23	5		9.80523	8.48544	0.890728	715.583	625.389	53897	4.02885		14	17		12.4457	10.4807	0.853593	9909.17	6598.32	3189595			5	50		4.37801	3.46432	0.864474	1938.72	1351.01	191864			15	66		20.8886	18.024
6	9		6.47424	5.37498	0.862116	2017.08	1760.7	198321	2.41702			23	6		8.94106	7.47714	0.853	745.613	625.651	81000	0.517464		14	18		5.22396	4.39431	0.894719	9398.89	6601.34	1279887			5	51		16.1055	13.3975	0.842411	1916.18	1354.23	826283	6.80007		15	67		19.2009	16.3117
6	10		3.77787	3.20189	0.916231	2510.93	1937.75	231180	1.48851			23	8		6.86869	6.00946	0.922509	752.399	641.162	49952	4.90908		14	19		13.9081	11.6875	0.853699	10330.7	6751.5	4096868			5	52		5.45379	4.41285	0.877829	1858.46	1415.93	233802	0.662571		15	68		8.77911	7.57383
6	11		12.0912	10.1079	0.864119	1861.39	1649.38	224433	11.0562			23	9		11.1325	9.42707	0.881476	730.406	636.973	63580	3.90706		14	20		13.9296	11.8693	0.861968	9294.89	6459.3	4310213			5	53		7.05126	5.69144	0.859645	1539.18	1299.93	177901	1.90609		15	69		7.43473	5.81418
6	12		3.96942	3.22682	0.883531	2109.21	1757.49	191681	3.26388			23	12		9.67376	8.32271	0.875296	730.55	644.254	37404			14	22		11.057	9.06263	0.814407	10228.4	6871.71	2532063			5	54		21.8742	18.8208	0.8777	2037.84	1305.54	1423847			15	70		18.0214	15.3342
6	13		5.86025	4.96551	0.889233	2004.23	1760.38	123739	2.46312			23	13		9.12916	8.06156	0.911071	683.032	606.391	35791			14	23		11.9634	10.3358	0.885702	10495.5	6544.05	4272517			5	55		6.28158	5.08563	0.858308	1632.28	1353.56	241383	1.35193		15	71		12.8486	11.1405
6	14		9.78074	8.23713	0.869648	1877.44	1662.16	180188	4.11787			23	16		4.89951	4.0329	0.884772	764.963	637.628	50498	3.43249		14	25		10.8715	9.04966	0.835638	9678.45	6686.89	2780733			5	56		3.9069	3.16591	0.884703	2065.91	1417.23	245768	2.16126		15	72		7.81848	6.70622
6	15		8.84964	7.67996	0.907116	2541.15	1946.16	782410	6.86562			23	17		2.55403	1.88761	0.817609	772.454	681.263	10028			14	26		7.58059	6.192	0.851071	9132.16	6424.81	1833989			5	57		5.15663	4.25991	0.884256	1954.73	1350.89	409960	4.61539		15	73		7.17838	5.84368
6	16		3.02741	2.39771	0.879888	2209.39	1814.71	196079	1.58293			23	109		8.71251	7.33641	0.872127	741.008	607.046	81987	5.75277		14	27		9.07907	7.92431	0.902914	11317.5	6471.7	3458597			5	59		16.6943	14.2913	0.867792	1609.03	1298.72	426897	7.90353		15	74		13.4374	11.2111
6	17		4.12876	3.2912	0.853203	2751.71	1827.88	425575	2.73061			23	110		9.64263	8.07737	0.859166	833.809	674.216	101824	6.06437		14	28		12.0603	10.209	0.866745	8834.86	6318.22	2442116			5	60		7.40496	6.112	0.867768	1523.88	1323.51	94665			15	104	4	3.17087	2.50872
6	18		8.04198	6.80712	0.889452	2066.1	1788.78	255893	2.96051			24	1		19.7715	16.9193	0.85955	665.087	587.849	74763			14	30		12.1256	10.219	0.856729	8898.3	6791.73	1730392			5	61		8.44718	7.10556	0.882177	1977.09	1363.33	693661	1.29726		15	107	4	20.3921	17.2874
6	19		13.8984	12.0006	0.879023	2368.26	1843.02	814347	5.24027			24	2		9.37957	7.96428	0.897175	706.117	602.725	71522	2.04001		14	31		10.6058	8.86945	0.871993	10643.5	6647.03	3230422			5	64		20.803	17.8869	0.867451	2019	1356.15	1382889	1.88655		15	130		13.956	11.7915
6	20		9.66499	8.33803	0.892677	2307.58	1950.79	232566	8.12692			24	3		17.489	15.2722	0.902716	692.674	592.078	146162	14.2337		14	32		8.43804	7.02816	0.8533	9964.42	6873.39	2033744			5	65		7.05983	5.92933	0.879997	1817.95	1319.07	448907	5.81137		15	131		26.9684	23.2323
6	21		6.02724	5.17146	0.905628	2287.55	1909.85	459542	3.2494			24	5		20.7854	18.1717	0.890528	689.011	579.586	213364	10.323		14	33		14.5418	12.4992	0.875888	9150.27	6191.55	4055291			5	66		14.5019	12.4548	0.879214	1791.68	1310.51	587329			16	4		23.6253	20.8201
6	23		6.49399	5.56161	0.901221	2155	1824.39	370140	2.02571			24	6		11.7945	10.1321	0.885461	732.266	619.136	115802	5.31273		14	35		7.36078	6.01975	0.846214	8554.13	6102.14	1469549			5	67		14.9192	12.6154	0.864088	1853.56	1321.39	694746	5.75383		16	10		11.6031	10.2605
6	24		6.76313	5.67461	0.882723	2839.8	1875.44	1143967	1.74377			24	7		9.84631	8.5245	0.899744	681.796	598.705	49152	5.72552		14	46		19.3704	16.1823	0.845046	10747.9	6765.21	6489305			5	68		16.8921	14.586	0.883578	2300.82	1336.35	2508327	5.54728		16	11		6.28727	5.29622
6	25		9.6355	8.25593	0.884012	2020.92	1758.34	220319	4.90639			24	9		2.65357	2.04409	0.86433	663.723	586.354	8017			14	47		10.9966	9.10955	0.845006	9847.18	6503.33	2909205			5	69		6.2763	5.1826	0.862434	1516.91	1256.77	213570	3.06056		16	13		11.9264	10.3231
6	26		8.35518	7.07414	0.870052	2159.52	1738.01	405853	3.65191			24	10		39.014	33.9679	0.870614	704.723	587.603	573839	25.2828		14	48		10.4775	8.67128	0.845034	10060.4	7103.25	2088809			5	72		6.51833	5.29237	0.844745	1954.69	1523.79	225441	2.88583		16	132		41.3656	36.6498
6	27		5.03468	4.21928	0.896681	1855.19	1654.26	119967	2.89921			24	12		7.04437	5.60923	0.819906	719.55	625.905	34850			14	49		5.08498	4.11234	0.845	9918.3	6850.48	1141327			5	73		7.93911	6.57079	0.854213	1697.28	1217.75	409797	2.64869		17	1		9.17613	8.01251
6	28		15.6968	13.0497	0.842098	2692.64	1839.44	2094266	6.9861			24	13		3.61449	2.96426	0.884911	711.171	641.629	9639			15	1		6.20135	5.27564	0.901575	8453.53	6119.89	1019150			5	76		7.29449	6.04768	0.865342	2112.43	1324.8	512615	3.21612		17	2		12.7542	11.0919
6	29		4.64069	3.76625	0.887322	2430.14	1899.54	533069	1.12012			24	14		7.561	6.15776	0.844978	691.884	597.191	36937			15	2		8.1758	6.94943	0.893703	8440.71	6211.47	1238120			5	84	10	0.238062	0.0295787	0.161008	1514.14	1465	181			17	4		17.78	15.3643
6	30		5.17707	4.2177	0.855519	2516.15	1799.14	550012	0.826771			24	15		7.39081	6.38063	0.904332	669.391	581.571	44621	4.70846		15	3		6.46578	5.43448	0.882107	8499.17	6071.62	1147316			5	162		8.71901	7.2905	0.865232	1620.18	1276.43	246279	2.71509		17	5		6.43436	5.40708
6	32		5.15437	4.36476	0.912551	3204.21	1911.04	1176377	1.58763			24	16		6.77971	5.80948	0.89256	725.811	607.812	64938	5.09753		15	4		15.1198	13.2911	0.902277	9799.12	6110.32	4728329			5	163		10.4475	8.30787	0.839385	1890.34	1480.07	260578	4.80936		17	6		14.6925	13.0152
6	33		10.1074	8.54626	0.881178	2003.98	1824.38	207355	5.28999			24	19		6.75146	5.66836	0.876177	618.756	548.684	22323			15	5		6.62003	5.80916	0.912889	9364.28	6407.91	1293245			5	164		8.40027	6.89372	0.848785	1743.92	1382.29	229532			17	7		18.508	16.5443
6	34		6.08165	5.09413	0.882601	1973.98	1643.44	225490	3.89425			24	20		23.1389	19.8468	0.86619	718.143	573.821	438498	11.5637		15	6		6.32829	5.26425	0.868222	7736.69	6244.63	582040			5	165		7.54702	6.22326	0.865856	1792.55	1388.09	249118	1.51168		17	9		14.269	12.2153
6	35		5.96339	5.02503	0.895647	2277.46	1817.05	443048	0.575564			24	111		11.618	10.014	0.881892	735.087	612.229	138702	7.57166		15	7		7.55136	6.44454	0.890142	9025.25	6372.27	1249269			5	166		19.041	15.8948	0.847492	1730.59	1354.07	574692	3.79964		17	10		12.656	11.1023
6	36		3.62435	2.67684	0.796383	2094.19	1834.56	121686	2.32237			24	112		7.16247	6.05084	0.882513	721.752	611.945	63017	1.96164		15	8		9.61486	8.1255	0.871363	9013.77	6121.19	2334611			5	167		6.34963	5.1826	0.845	1516.19	1255.74	170244	1.17299		17	11		10.8399	9.56822
6	37		6.08348	4.99913	0.876471	2093	1789.97	209453	4.6614			24	113		23.7585	19.9327	0.849141	723.048	601.069	271748	11.9422		15	9		5.25737	4.22378	0.851357	8912.56	6735.07	698176			5	168		7.09791	5.89491	0.857302	1560.24	1284.27	291521	3.38941		17	12		6.52657	5.64945
6	38		7.20778	5.99674	0.87782	2656.73	1995.62	541100	3.27995			25	2		13.856	11.9365	0.881287	659.148	558.56	123187	8.26382		15	11		10.1194	8.45394	0.85674	8228.89	7030.77	535848			5	169		6.66615	5.49586	0.870713	1714.13	1329.31	275033	2.03922		17	13		8.5745	7.62386
6	39		8.28818	7.02447	0.884312	1980.17	1694.52	212081	3.97987			25	3		9.28811	7.87333	0.877062	641.422	566.514	39581	4.87546		15	12		11.4778	10.1435	0.897234	8325.92	5928.23	2161730			5	170		7.65337	6.28234	0.845	1558.55	1296	135734			17	15		10.5488	8.94905
6	40		3.10694	2.48715	0.895554	3943.62	2113.58	621659	0.797496			25	4		15.2262	13.1439	0.881339	674.413	570.991	169062	6.94858		15	13		5.22737	4.31401	0.861955	22090.7	7129.77	5868404			5	171		4.19029	3.35892	0.845078	1771.2	1314.13	166841	2.34481		17	16		11.782	10.1026
6	41		4.10899	3.25335	0.861659	2780.12	2185.89	26014				25	5		2.93973	2.3512	0.888304	628.354	546.193	12684			15	14		3.76497	3.01618	0.882711	10029.5	6409.04	806647			6	1		2.54343	1.9463	0.863205	1411.76	1208.6	31883			18	1		10.6331	9.23864
6	44		5.77883	4.80506	0.883265	2249.58	1868.33	432321	3.413			25	6		41.953	36.5603	0.876526	684.791	564.003	658250	33.9384		15	15		13.4205	11.2339	0.850558	10383	6368.3	4259734			6	2		13.5473	11.4188	0.85707	1394.4	1155.11	232161	5.63379		18	2		9.43735	8.12719
6	45		7.96859	6.8088	0.902472	2594.43	1816.98	880281	1.15459			25	7		7.16482	6.27622	0.917631	659.509	561.852	64100	2.10074		15	17		6.76403	5.65063	0.89646	8933.36	6562.57	1379231			6	3		5.76664	4.83468	0.876047	1509.68	1242.95	104630			18	4		13.6652	11.5387
6	46		5.34719	4.34846	0.870852	2981.42	2065.8	985544	1.30443			25	8		13.9016	12.0234	0.882882	664.259	546.213	153032	5.82669		15	18		10.4882	9.17907	0.899685	11192.3	6758.64	2998359			6	4		15.7576	13.4719	0.87108	1460.93	1210.39	299735			18	5		10.7573	9.03633
6	47		6.20641	5.0913	0.864331	2115.79	1770.09	321418	1.08963			25	9		7.29072	6.093	0.877405	692.249	589.402	58875	5.14105		15	19		19.7283	17.4719	0.900623	10936.7	6152.02	8879484			6	6		4.47062	3.71462	0.893524	1536.24	1276.1	78411			18	6		12.9217	11.1677
6	48		2.81058	2.20423	0.861426	2566.84	1846.97	282972	1.04032			25	10		8.11323	6.71889	0.889399	689.12	584.796	60621	3.54298		15	20		8.37809	7.24206	0.899657	8770.39	6303.39	1520096			6	7		4.5815	3.8407	0.901827	1768.48	1312.16	177108	2.60979		18	8		9.15581	7.98248
6	49		3.41894	2.69989	0.866065	2308.7	1931.66	177051	1.87145			25	114		17.609	15.1384	0.875594	648.907	554.499	136769	12.5399		15	21		11.987	10.3543	0.885986	9675.33	6138.57	3744850			6	9		7.65497	6.48618	0.876853	1773.35	1361.53	518175	1.9359		18	9		8.58335	7.40917
6	50		5.30904	4.24981	0.870266	2076.56	1829.82	147371	3.60867			25	115		11.1149	9.5234	0.876236	670.772	582.636	78027	4.02069		15	24		12.0222	10.2932	0.86646	9294.05	6166.56	3430450			6	10		19.0549	16.0226	0.84701	1692.56	1328.65	464275	8.85114		18	10		9.73022	8.22276
6	51		5.44194	4.31984	0.858064	2043.25	1776.44	109793				25	116		8.19682	6.99789	0.885346	669.593	552.661	83718	3.22879		15	25		9.9361	8.26828	0.863447	8885.48	6348.24	1974995			6	14		8.96132	7.30638	0.823861	2422.86	1499.64	476003			18	11		10.0419	8.87248
6	52		7.9819	6.57776	0.860447	2022.71	1747.82	257914	3.70753			25	117		7.8839	6.57007	0.864844	615.044	542.947	27186			15	26		5.52622	4.58614	0.890618	8400.11	6152.08	1023262			6	15		3.16656	2.45938	0.852578	1527.75	1262.37	52442			18	12		16.4338	14.3773
6	53		2.82733	2.19708	0.875935	2006.92	1678.87	79996	0.776289			26	2		24.339	20.7098	0.871597	692.602	565.51	408991	11.2067		15	27		17.4275	14.8404	0.859805	10445.5	5881.18	6706159			6	17		3.40012	2.6219	0.847613	1923.21	1374.99	112171			18	13		9.11979	7.39273
6	54		5.19481	4.2392	0.853682	3927.81	2008.67	1029522	3.38064			26	3		4.48984	3.55269	0.863292	678.072	573.914	28415			15	50		11.5651	9.7796	0.866624	9711.66	6212.08	3171128			6	22		5.05446	4.00133	0.843403	1952.72	1601.95	89334	2.19976
6	55		6.08156	5.09698	0.890246	2300.35	1788.48	316273	3.70302			26	4		18.8547	16.2619	0.882117	666.738	554.976	178443	11.8896		16	1		14.3243	12.2698	0.872726	8805.92	5592.6	3484291			6	23		2.8971	2.30929	0.895001	1994.16	1454.23	107987
6	56		6.11868	5.08891	0.875957	2332.24	1771.61	476497	3.64983			26	5		17.5225	15.0693	0.884062	668.754	560.36	187526	4.709		16	3		5.76254	4.98415	0.888479	8965.17	5989.4	1485490			6	24		20.699	17.5924	0.865068	1710.23	1331.74	564889
6	57		4.10633	3.27676	0.855821	2069.86	1709.36	151045	2.69048			26	6		5.03319	4.06292	0.835381	681.407	624.619	6212			16	4		10.1213	8.54827	0.86919	7677.54	6133.8	1172376			6	25		6.30132	5.04891	0.864292	2849.15	1430.87	887053	0.965749
6	58		8.17858	6.97782	0.894968	2023.98	1715.55	243402	5.0094			27	3		11.0255	9.62212	0.896785	626.102	538.355	84249	7.13818		16	5		8.28782	7.08196	0.891611	7607.99	5674.81	1171020			6	26		23.812	20.9939	0.88976	2778.72	1277.89	3172955	3.69867
6	59		10.5688	9.10281	0.891634	2303.35	1740.79	582733	6.53013			27	5		6.91345	5.92107	0.8972	666.436	563.009	45916			16	6		6.9751	5.78647	0.851608	8037.19	5782.5	1071163			6	27		7.46242	6.01258	0.872417	1726.41	1399.81	317266	1.95282
6	60		3.85585	3.11118	0.888084	1895.89	1667.65	93744	1.69158			27	7		20.0443	17.5618	0.884113	683.776	559.884	273251	13.8592		16	7		13.7496	11.52	0.836427	8023.29	5826.56	2064794			6	28		2.90129	2.20153	0.841958	1738.64	1356.24	57399
6	61		2.31953	1.74866	0.865571	2410.56	1757.37	183867	1.05456			27	9		7.26365	6.17174	0.897888	624.164	534.013	39335			16	9		5.05	4.26702	0.891965	8482.28	5829.75	1046596			6	29		6.42501	5.34525	0.886365	1712.94	1293.81	206320
6	62		11.215	9.38383	0.847937	1733.04	1561.2	286710	4.57915			27	10		7.06729	6.07213	0.890097	637.523	557.968	31626	1.76482		16	10		7.17491	6.055	0.876869	9071.67	6089.16	1253394			6	30		4.99893	4.10359	0.878397	1596.27	1340.19	111717	2.48598
6	63		4.77118	3.95486	0.89666	2232.28	1764.57	193541	4.12996			27	12		4.97111	4.12126	0.873261	629.066	547.879	19775			16	11		18.2733	15.4797	0.863164	8820.88	6258.38	3421997			6	31		3.28647	2.51751	0.844205	1476.03	1271.54	45129
6	64		7.02104	5.93221	0.888668	2444.18	1705.87	579270	1.23889			27	14		5.96797	5.14022	0.918002	616.035	528.199	33362	2.73544		16	12		6.17063	5.13014	0.884612	8550.96	5978.75	1354074			6	32		7.12169	5.67164	0.84273	1848.15	1387.41	261236	1.4844
6	65		6.55213	5.48832	0.878415	2145.62	1702.46	818944	3.91943			27	15		15.4007	13.5752	0.908147	637.214	521.531	173039	5.69226		16	14		4.30653	3.60357	0.889028	9817.26	6050.19	1244058			6	33		7.21009	5.9689	0.869697	2060.62	1373.17	323888	4.56565
6	66		3.44205	2.76373	0.876334	2396.55	1676.37	223228	0.314878			27	118		13.678	11.568	0.874708	662.789	558.992	91682			16	15		6.39545	5.30456	0.86704	9249.58	5923.57	1764593			6	34		9.99491	8.5664	0.8954	1935	1285.65	991147	7.31002
7	1		9.03987	7.71361	0.88814	2125.32	1761.96	469560	2.47673			27	119		3.7135	2.97797	0.842589	656.734	582.982	12210			16	16		17.9852	15.6391	0.882194	13147.9	6088.52	10139258			6	35		7.23582	6.1686	0.893627	1478.51	1222.39	186983	4.93016
7	2		6.41138	5.40415	0.881932	2044.87	1702.21	310421	1.7111			27	120		40.0451	34.3723	0.856302	670.899	534.402	742383	2.52999		16	17		11.7754	9.95335	0.868604	8496.81	5998.93	2577866			6	37		6.8387	5.60708	0.874673	1555.2	1282.44	130198
7	3		5.72113	4.77003	0.87848	2180.22	1726.11	340708	0.600003			28	2		6.19087	5.21158	0.879761	641.183	540.925	41313			16	18		13.3618	11.4799	0.871702	9309.54	5848.4	4035487			6	39		32.775	28.0391	0.858365	1667.55	1287.81	1076082	4.18068
7	4		6.39534	5.42084	0.898247	2102.94	1770.16	169015				28	3		8.23032	7.0684	0.899393	644.511	546.003	73296	4.44818		16	19		17.6546	15.4448	0.885766	8662.24	6013.16	3821497			6	40		8.62784	6.76851	0.808167	2005.05	1580.77	383705	0.551027
7	5		5.88136	5.07095	0.908469	2327.68	1773.64	589143	3.01702			28	4		4.76313	3.95442	0.894793	609.259	539.557	15717			16	20		10.2822	8.54606	0.8654	8790.07	6042.87	2291354			6	45		12.7566	10.7987	0.871936	1649.2	1281.17	358303
7	6		9.74826	8.02744	0.849165	2032.12	1723.13	656404	5.55623			28	5		11.7447	10.1888	0.882828	613.424	527.163	62973			16	22		7.63409	6.39999	0.894443	9047.72	6176.73	1638044			6	46		7.01815	6.00998	0.90309	1863.33	1290.28	505748	5.3716
7	7		5.96442	5.09032	0.893836	2173.5	1731.03	340462	3.99268			28	6		8.59018	7.12753	0.85809	612.827	521.241	46619			16	23		5.08651	4.18436	0.877695	8267.72	6301.15	624740			6	48		10.1111	8.40039	0.853261	1656.48	1452.95	111511	9.58504
7	8		9.11687	7.65165	0.864648	1954.44	1748.14	253620	3.11738			28	7		11.5426	9.73305	0.858656	612.392	529.982	54866	7.10104		16	24		9.53951	8.03036	0.863296	7556.83	5452.33	1673518			6	49		5.11945	4.21312	0.878208	1524.47	1257.8	94658
7	9		5.93657	4.93964	0.887405	1924.02	1759.16	85242	3.25958			28	8		10.0527	8.30758	0.853351	600.164	517.576	53083	6.6856		16	25		13.345	11.9276	0.918432	13876.6	6515.79	7617956			6	50		8.20529	6.74456	0.853319	1721.49	1294.11	272389
7	10		9.63879	7.75276	0.830831	1929.16	1677.98	303542	2.36474			28	9		11.8687	10.1637	0.882787	620.618	531.262	104207	6.15542		16	51		10.1098	8.48435	0.8674	8975.09	5773.99	2827077			6	51		21.5495	18.0867	0.846779	1757.45	1223.1	1156966	5.35412
7	11		18.1696	15.8962	0.899715	2276.12	1708.38	2213873	0.984623			28	10		10.5387	9.10216	0.881938	636.744	534.846	79765	4.81001		16	52		10.3897	8.59558	0.845003	9264.5	5851.64	3052575			6	52		5.73551	4.56847	0.845523	1790.02	1394.74	224265	2.00242
7	12		6.65122	5.71442	0.906869	3051.61	1869.86	1480312	2.27763			28	11		10.9488	9.47233	0.886746	604.443	518.176	84570	7.09053		16	53		8.40255	6.91828	0.845012	8755.28	6161.45	1565156			6	53		9.18277	7.85507	0.898992	3862.88	1487.89	2075379	3.3066
7	13		7.10251	6.10627	0.900137	2123.64	1738.49	283720	1.66473			28	12		9.10524	7.73353	0.88207	596.301	513.037	46186	5.63007		16	54		13.849	11.8291	0.877123	8811.47	6138.64	2471063			6	54		4.21661	3.36111	0.862092	1693.44	1323.82	210886	1.72242
7	14		7.54272	6.28969	0.864952	2046.91	1720.85	554168	5.93848			28	13		6.85988	5.8655	0.895136	630.752	529.996	46398	3.46041		16	55		11.0526	9.15582	0.845074	9671.22	6552.28	2644684			6	55		5.31221	4.30025	0.85961	1554	1231.68	151794	1.85603
7	15		14.7627	12.7359	0.883204	2210.44	1726.13	1727453	5.07481			28	14		12.3583	10.6385	0.881422	598.166	517.397	65609	6.86919													6	56		2.1572	1.59956	0.849422	1409.44	1249.52	18359
7	16		8.54654	7.05403	0.865822	2057.13	1706.78	481738	3.6148			28	15		20.0347	17.462	0.879283	632.697	520.952	257666	13.7674													6	57		5.69983	4.63657	0.865495		1855.91	0
7	18		2.78849	2.20474	0.909387	1791.2	1578.46	49159	1.88008			28	16		13.7258	11.4945	0.866558	613.65	519.252	82189														6	58		5.33108	4.37268	0.877878	2065.76	1472.94	383288	4.59476
7	19		8.61145	7.40365	0.903224	2388.14	1752.75	1110702	3.57017			28	17		7.19308	6.01252	0.885647	574.983	495.757	33324														6	59		5.08244	4.05178	0.853537	1566.48	1232.18	147305	1.63203
7	20		7.29069	6.1301	0.875296	1951.19	1632.08	262351	3.20721			28	18		3.80043	2.98808	0.84249	606.195	534.339	12351														6	60		5.75644	4.81911	0.884344	1586.34	1286.45	133916	1.39517
7	21		2.69839	2.12164	0.891427	2489.74	1745.89	205827	1.42694			28	19		7.10107	6.01421	0.88628	590.603	513.573	29907	1.76417													6	61		5.40633	4.36487	0.855603	1575.27	1195.82	137528
7	22		7.43651	6.14594	0.865835	1919.08	1652.66	176205	5.34515			28	121		20.2631	17.4165	0.875649	640.058	543.62	244345	16.4306													6	62		6.83131	5.61914	0.874195	1461.02	1227.82	181271	1.02157
7	23		4.25404	3.37298	0.876569	2021.79	1599.98	180441	3.09466			29	1		17.0111	14.656	0.874229	629.296	528.792	169583	7.06696													6	63		5.44739	4.38795	0.858104	1867.08	1315.76	233503
7	24		5.89572	5.07245	0.923051	2458.57	1782.59	478865	0.659188			29	5		9.64858	8.14928	0.868732	573.76	503.536	36032	6.64098													6	64		6.98725	5.80374	0.895945	2286.29	1309.07	529014
7	25		3.82908	3.03154	0.878857	2354.96	1713.54	233459	1.63522			29	6		29.9418	25.8376	0.867946	604.222	513.618	236075	14.3542													6	65		9.30769	7.89999	0.88229	1707.45	1301.15	295694
7	26		7.60736	6.38707	0.897062	2031.35	1618.48	419014	6.36657			29	8		10.6703	8.91159	0.864368	582.982	502.298	59109	7.08529													6	67		5.90037	4.89529	0.879623	1674.54	1258.38	183631
8	2		7.60467	6.37315	0.87866	2075.18	1714.57	356858	5.11616			29	10		10.6269	9.15787	0.892515	609.092	521.724	76294	6.85573													6	68		6.44935	5.45192	0.898522	1995.7	1356.78	277393	5.75167
8	5		11.0712	9.43819	0.875433	1910.87	1755.26	172049	6.22673			29	11		17.0649	14.8389	0.886453	597.475	512.231	108125	5.85618													6	69		6.77414	5.54103	0.872822	1698.15	1284.98	222165
8	10		5.42738	4.49997	0.878312	1928.21	1686.48	182684	3.27832			29	12		6.87208	5.83573	0.88855	577.335	504.409	27805														6	70		7.70586	6.47316	0.867005	1638.49	1277.41	275736	2.05441
8	27		9.5896	8.31098	0.898052	2778.34	1837.04	1571094	6.40602			29	13		9.53313	8.21687	0.897887	571.733	509.097	28408														6	73		6.74145	5.57234	0.860385	1649.56	1356.39	181980	3.91104
8	28		5.63049	4.64313	0.871877	1856.48	1655.56	106546	3.7419			29	122		2.50053	1.91811	0.825468	599.708	525.053	9282														6	75		9.04915	7.66571	0.886381	1493.56	1256.89	214467	7.29481
8	29		5.95492	5.092	0.894359	2750.27	1774.1	744813	3.15001			30	1		7.58443	6.66681	0.919666	637.007	533.266	63217	4.09615													6	76		5.34043	4.33758	0.86111	1738.56	1204.78	354147	1.50186
8	30		6.78449	5.82644	0.886573	2104.09	1704.78	369850	2.70131			30	2		7.04783	5.98088	0.889695	647.969	549.692	45196														6	172		8.64165	7.18817	0.868177	1665.71	1301.84	255804	3.37836
8	32		6.31951	5.27322	0.874358	2310.18	1750.9	554849	4.56832			30	4		8.13545	6.99791	0.901153	646.713	540.459	72842	3.80069													6	173		16.3997	13.8475	0.863565	1816.28	1240.11	940002	6.36227
8	33		7.60632	6.42005	0.883737	1949.09	1605.89	388365	1.69379			30	5		15.7012	13.6382	0.891449	593.243	500.317	139908	10.0237													6	174		11.0086	8.87898	0.824715	1824.01	1529.83	275812	2.9351
8	34		5.32227	4.34231	0.872588	2293.77	1762.06	435319	3.56234			30	6		19.5694	16.8697	0.885265	604.83	518.972	125513	10.5911													6	175		8.35935	6.8815	0.845104	1777.09	1439.81	273500	2.04607
8	35		7.26728	6.20489	0.893216	2099.07	1737.61	396407	4.61226			30	50		10.6754	9.17771	0.884785	605.878	518.606	64490	5.06546													6	176		8.87973	7.56421	0.87089	1746.77	1463.48	214323	3.4799
8	37		7.84564	6.59112	0.884635	1903.43	1610.09	341349	3.86058			30	51		36.5636	31.5605	0.873976	602.132	499.681	377342	15.083													6	177		4.30595	3.45408	0.845	1416.12	1249.42	39048
8	38		5.03473	4.25425	0.897045	1957.41	1686.42	163880	3.1482			30	123		9.05798	7.60275	0.871914	622.157	532.026	53132	4.63609													6	178		12.0387	9.99047	0.845009	1695.9	1290.02	338665	7.99701
8	39		3.94403	3.21974	0.885204	2444.04	1864.93	425014	1.19759			31	1		10.4376	8.98443	0.887026	690.616	563.79	168056	6.71516													6	179		8.89885	7.65272	0.896867	1506.41	1276.54	135218
8	40		2.37517	1.8359	0.850005	3639.35	1901.58	319361				31	3		8.60012	7.21792	0.873625	666.913	561.481	60998	3.3978													6	180		6.31005	5.14881	0.845015	1778.52	1341.73	232508	3.90799
8	41		6.71368	5.67989	0.896983	2074.84	1717.43	304720	4.20127			31	4		8.56762	7.26432	0.879621	647.333	556.593	47087														6	181		5.44959	4.32121	0.836994	1631.64	1319.8	149537	1.73032
8	42		7.83258	6.59262	0.872461	2530.44	1845.51	596862	1.12089			31	5		8.69007	7.45135	0.891421	675.956	559.877	97377	4.84489													6	182		54.3869	46.5208	0.866626	1728.61	1289.9	2809295	7.50759
8	43		8.79834	7.44367	0.882714	2056.29	1821.45	546613	5.13077			31	6		14.3968	12.4489	0.888085	696.228	568.381	208061	5.97426													6	183		6.1373	5.00325	0.845031	1736.03	1284.27	326637	1.27944
8	45		9.2513	7.84358	0.880818	2380.28	1911.99	743435	0.328171			31	7		14.4212	12.6179	0.893979	679.288	562.835	216533	8.88866													6	184		4.20025	3.24889	0.833471	1532.23	1309.05	57327
8	46		2.81132	2.1832	0.876137	2439.69	1913.28	235444	0.356431			31	8		5.33366	4.41361	0.883096	650.774	571.302	25387	3.85579													7	1		8.14707	6.75585	0.858676	1571.06	1216.54	281452	7.22667
8	47		5.01505	4.17675	0.899687	2113.89	1739.29	306408	0.464371			31	9		6.86595	5.85708	0.885618	643.2	557.831	37051	0.968636													7	4		2.5025	1.88125	0.853633	1387.08	1260.94	14599
8	48		4.66028	3.80737	0.891698	2482.46	1810.88	502862	2.87811			31	10		19.6321	17.0084	0.872202	691.8	549.824	450330	11.0608													7	6		7.55336	6.26145	0.86504	1619.22	1250.51	393989	3.52432
8	49		5.33496	4.3199	0.867339	2155.44	1741.68	408340	3.10166			31	12		3.92018	3.31486	0.904799	620.898	529.923	21575														7	7		23.6498	20.9215	0.894881	2431.3	1251.53	2755668	1.6232
8	50		6.07916	5.15202	0.896006	2303.25	1737.79	567854	1.994			31	14		17.4103	15.07	0.882093	674.444	535.473	260282	7.40446													7	8		23.183	19.0689	0.830776	1630.56	1225.06	884815	12.0559
8	51		4.0152	3.22699	0.872862	2203.13	1784.95	364383	1.33196			31	55		59.1033	51.6879	0.879489	668.604	544.589	829277	22.3243													7	9		5.10212	4.04183	0.824997	1546.09	1212	216265	2.21332
8	52		11.2545	9.28704	0.873005	1932.25	1679.61	316629	3.11585			31	56		11.2954	9.50298	0.859616	610.279	539.829	39252	7.8316													7	10		4.90582	4.04852	0.880703	1369.96	1175.85	79945	2.60409
8	53		7.62684	6.66028	0.918569	1972.04	1676.22	212080				32	1		3.59674	2.97125	0.893815	648.838	562.892	17204														7	13		3.72688	3.02837	0.883551	1774.92	1239.02	153457
8	54		14.6071	12.9929	0.91444	2378.08	1712.4	3688358	12.4707			32	3		17.4544	14.9958	0.873417	663.934	546.203	246022	7.66769													7	14		7.05945	5.88077	0.876781	1637.56	1186.62	241562	3.35525
8	55		9.7371	8.30775	0.890336	1939.68	1605.88	370896	2.63387			32	4		22.9988	19.8963	0.874859	668.84	543.344	403929	13.2733													7	15		8.20619	6.8143	0.871028	1517.06	1214.4	192050
8	56		4.45795	3.73757	0.895463	2158.49	1753.15	363117	1.732			32	5		14.0893	11.8535	0.86177	634.839	561.531	64248	7.65545													7	19		6.70656	5.44631	0.87613	1355.37	1157.55	89894
8	57		13.2796	11.4198	0.872406	2776.18	1713.22	2214648	7.05631			32	6		5.5445	4.62977	0.876202	634.814	534.743	44471	3.03469													7	20		7.12795	6.02172	0.890112	1567.05	1249.5	180384
8	61		4.84078	4.0011	0.892991	2004.09	1679.7	226601	1.84778			32	7		12.906	10.7657	0.856618	632.55	540.19	70442														7	22		3.36298	2.67069	0.886342	1454.5	1219.49	52969
8	62		7.79132	6.61174	0.878256	2046.57	1665.44	497444	3.63537			32	9		5.92141	4.81544	0.846144	662.938	525.864	94024	3.09631													7	25		5.57566	4.41821	0.850051	1467.21	1256.26	102792	2.34508
8	64		12.7028	11.3003	0.908593	2952.24	1750.56	2742880	2.10833			32	52		10.7194	9.11417	0.875968	643.462	546.099	71242	4.15859													7	27		5.02266	4.1131	0.882237	1374.58	1174.11	66183
8	65		9.1994	7.71941	0.859169	2470.15	1653.76	1540960	6.76516			32	53		7.01362	6.04161	0.917916	658.355	549.475	63354	3.44836													7	28		5.72535	4.46433	0.844915	2016.7	1396.49	332363	0.79761
8	66		12.8563	10.971	0.87075	1898.93	1620.77	332436				32	54		7.00289	6.00685	0.899291	720.711	552.174	127207	3.55457													7	29		7.88856	6.54813	0.879619	1809.58	1283.84	470538	1.46019
8	67		8.75204	7.24089	0.857446	1989.13	1642.76	449039	2.32651			33	4		7.03115	5.91613	0.89174	684.454	579.668	43942														7	31		16.0919	13.6282	0.864308	1751.11	1244.99	844544	9.70957
8	68		4.65311	3.78009	0.881049	2482.88	1570.63	414171	0.587407			33	6		6.60992	5.60019	0.891678	712.393	558.947	148059	2.91779													7	32		9.7698	8.28421	0.879838	1675.08	1242.07	523195	5.23509
8	69		5.47699	4.66084	0.905083	2110.2	1730.59	382761	2.79331			33	10		11.9407	10.0479	0.861746	686.29	567.593	127330	5.93225													7	33		5.9282	4.92066	0.881525	1541.13	1265.42	150355	3.27053
8	132		9.95369	8.49132	0.869206	2341.21	1748.17	708489	4.51394			33	11		14.5359	12.2424	0.840148	680.773	588.634	89064	10.3276													7	34		10.2715	8.5171	0.860786	1569.38	1230.41	325540	8.67845
9	1		10.0155	8.54863	0.873877	2181.37	1721.3	834467	4.61115			33	14		13.2942	11.2671	0.867913	695.378	565.372	168681	9.81666													7	35		21.593	18.1917	0.849974	1655.44	1192.84	1036582	8.99377
9	2		15.3229	13.312	0.884219	2045.57	1688.37	956357	1.65684			33	15		7.7346	6.70082	0.921807	700.992	570.824	127513	3.82148													7	36		4.27981	3.40896	0.831136	1500.87	1238.25	82674
9	3		5.65026	4.82175	0.898152	2066.63	1719.39	229494	1.5134			33	16		15.4491	12.9779	0.85242	619.339	526.081	102406	7.55289													7	40		4.92057	4.01167	0.863034	1460.62	1216.67	121105	1.97609
9	4		4.90809	4.07481	0.88533	1875.82	1659.14	100045	2.62434			33	17		9.47841	7.74751	0.844957	626.11	530.348	68661	4.45707													7	41		14.1391	11.5029	0.821165	1464.92	1217.57	375566	3.41814
9	6		11.4206	9.95921	0.896003	2500.72	1757.1	1162163	9.45588			33	18		16.6176	14.1367	0.876824	615.248	519.529	107833	0.573228													7	42		10.9348	9.12825	0.868903	1525.77	1237.75	278957	4.32677
9	9		9.3992	8.03155	0.885398	2014.29	1722.18	262460	1.67846			33	124		9.12963	7.66389	0.85979	701.334	580.932	139108	3.75283													7	43		5.02608	4.00747	0.857401	1530.26	1231.71	127163	1.31518
9	14		7.88973	6.55889	0.875302	2077.12	1755.86	299969	1.27815			33	125		2.18839	1.66616	0.847017	682.247	602.033	7649														7	44		6.44066	5.32603	0.875537	1363.54	1175.38	127849	1.62775
9	15		7.55184	6.57944	0.90249	3015.58	1933.69	1576456	2.38839			33	126		18.7861	16.1785	0.876109	698.824	584.855	221750	6.33408													7	45		6.13573	5.15268	0.886953	1837.82	1264.01	295262
9	17		7.71194	6.54016	0.890569	1945.11	1718.09	236091	5.21872			33	127		11.6184	9.65471	0.851199	665.666	580.273	56212														7	46		6.36877	5.09884	0.851512	1477.88	1252.66	89825
9	19		7.88927	6.51377	0.862208	2146.53	1767.25	396120	4.26471			33	128		9.41462	7.81922	0.857752	726.143	591.392	132405	5.56849													7	47		12.9089	10.9781	0.876694	1561.91	1213.36	485017	2.3077
9	20		7.08019	6.0162	0.908234	2680.63	1831.63	592877	1.04045			33	129		10.058	8.40999	0.848957	604.479	530.486	39313	5.18555													7	49		5.53956	4.55494	0.879933	1694.04	1243.12	229552	3.5256
9	25		3.33171	2.69536	0.894134	2074.43	1784.31	110911	1.8194			33	130		10.0418	8.1449	0.848221	607.254	527.651	41649														7	51		6.38555	5.42315	0.895184	1705.65	1236.98	260788	5.76569
9	26		7.75175	6.48171	0.887979	2028.66	1774.22	182000	5.02731			33	131		9.82497	8.32529	0.85947	820.75	581.322	178413	5.06725													7	53		5.12509	4.03054	0.834154	1597.55	1340.85	64138	2.80291
9	27		10.2356	8.75489	0.889565	2476.95	1831.16	1592742	3.63652			33	132		14.7504	12.4136	0.848724	1199.04	639.532	375624	8.2874													7	55		3.85757	3.09013	0.893125	1702.55	1254.73	130322	2.21951
9	28		6.09608	5.05695	0.876004	2421.34	1835.63	744688	1.52764			33	133		54.5635	46.9802	0.871908	697.182	572.64	948107	8.78272													7	56		3.19588	2.46211	0.850574	1384.83	1218.14	32283
9	29		7.39357	6.12164	0.863607	1940.34	1715.37	174809	5.29357			34	1		10.5104	9.28933	0.909689	694.116	532.232	132939	1.66169													7	57		7.12941	5.84905	0.862259	1414.07	1246.22	71890
9	30		5.01036	4.1222	0.873882	1965.37	1748.3	92218	0.18309			34	2		7.44656	6.2735	0.874627	664.328	527.705	64078	3.87563													7	58		8.92186	7.58847	0.883319	1399.27	1195.1	179152	7.16606
9	31		4.09485	3.30274	0.870721	1968.67	1656.84	156700	1.78358			34	3		14.1616	12.3403	0.88947	619.413	522.794	107426	8.75113													7	60		14.4343	12.0975	0.859862	1668.89	1215.33	508612	7.86829
9	32		5.52972	4.67995	0.904222	2297.86	1837.31	324721	0.879497			34	4		3.69148	2.99834	0.889463	622.089	531.81	19448	1.4372													7	61		6.85113	5.66484	0.875495	1841.25	1365.54	210440
9	33		9.37676	7.99793	0.879744	1971.4	1699.62	276082	3.3843			34	5		7.9055	6.71703	0.888751	650.248	536.207	71213	3.93053													7	64		7.16585	5.91193	0.848584	1560.79	1280.64	225000	1.2881
9	34		3.02115	2.40427	0.884525	2476.56	1864.63	346254	0.814178			34	6		15.6688	13.2947	0.868339	618.647	529.464	91076	7.57117													7	65		5.39162	4.39567	0.857174	1443.35	1143.24	137469	1.53876
9	35		5.47972	4.6627	0.920432	2193.97	1826.36	314769	3.08243			34	8		9.92829	8.26509	0.847054	621.223	545.863	35151	5.19488													7	66		10.6819	9.01173	0.865737	1621.24	1230.06	339523
9	36		6.48126	5.30346	0.864769	1923.63	1736.57	139476	4.15281			34	9		9.78372	7.92889	0.851555	621.653	543.462	41949														7	67		5.397	4.42472	0.874327	1803.87	1229.81	264048
9	37		7.40387	6.25157	0.886279	1901.83	1694.73	135856	4.94343			34	10		14.7681	12.7633	0.875523	662.169	549.039	209083	6.6912													7	68		13.5483	11.2173	0.846879	1313.6	1115.57	281812	1.43554
9	38		6.62363	5.53292	0.879637	2267.17	1693.09	423177	1.87208			34	12		11.3974	9.82819	0.892689	615.968	524.338	82099	5.45988													7	69		8.91979	7.21588	0.821574	1944.18	1399.97	385343	4.05333
9	39		3.03767	2.38967	0.892019	2009.18	1703.74	121241	1.17391			34	13		13.654	11.82	0.896794	600.045	522.771	74511	3.5687													7	70		5.41601	4.36618	0.859793	1731.71	1208.08	362399	1.59355
9	40		7.96917	6.8734	0.911286	2048.42	1737.92	288867	4.9771			34	14		20.9488	18.2338	0.884328	620.745	518.048	243345	11.9947													7	71		7.8847	6.6981	0.882748	1875.55	1185.48	479093	3.95221
9	41		3.80906	3.10412	0.88904	1936.2	1697	100505	2.53754			34	15		6.60619	5.78004	0.929581	666.055	528.556	96759	1.93938													7	72		5.29911	4.21203	0.819439	1601.86	1283.99	159413	4.74912
9	42		5.47103	4.72793	0.915794	2730.8	1933.79	775107	3.03255			34	134		16.4176	14.1194	0.894038	625.684	532.634	101727	10.1784													7	73		9.33618	7.84507	0.868437	1691.59	1121.5	459632	4.18072
9	43		6.92373	5.701	0.858426	2167.83	1742.97	856921	3.75546			34	135		9.61311	7.97095	0.861331	633.811	541.694	61604	4.56631													7	77		10.9511	9.11037	0.839141	1392.12	1202.53	239700	3.10028
9	44		10.3758	9.03795	0.907266	2261.27	1701.65	718288	1.09167			34	136		14.9421	12.9284	0.898619	654.539	541.285	181872	9.39812													7	78		10.4947	8.72717	0.852879	1575.08	1142.3	421198	1.79949
9	45		8.83657	7.49823	0.875707	2069.36	1691.24	407018	5.10115			35	1		14.3303	12.2092	0.87302	614.539	513.262	120836	7.57545													7	185		4.65613	3.71453	0.835079	1654.56	1287.72	198542	1.78473
9	46		9.68802	8.301	0.896274	2001.05	1677.7	351454	0.795804			35	3		7.24861	6.47569	0.934351	933.163	592.571	208317	2.13501													7	186		3.30382	2.60815	0.845	1893.15	1281.67	155037	1.5124
9	133		2.52486	1.95192	0.845002	2265.81	1744.55	110070				35	4		4.85545	3.94925	0.874738	734.237	557.358	86031	1.0293													7	187		7.83291	6.43575	0.845004	1752.72	1269.39	267578
9	134		7.92708	6.88859	0.921142	2473.7	1884.79	644638	2.5536			35	6		11.0198	9.41258	0.873092	669.367	559.951	103973	5.51136													7	188		6.02622	4.93638	0.865907	1656.7	1307.11	131407	2.644
10	3		6.05809	4.93807	0.849456	1915.9	1675.18	168333	2.02338			35	7		4.60554	3.77541	0.882453	601.659	533.816	15405														7	190		8.69335	7.22893	0.861544	1544.79	1273.26	221470	3.4089
10	4		6.68498	5.81229	0.888817	2906.02	1886.24	855025	3.69828			35	8		3.23852	2.6289	0.904418	654.794	556.272	23141	1.96242													7	191		5.50469	4.5219	0.870868	1479.62	1221.57	112439	2.26627
10	5		9.31396	7.94607	0.879671	2154.83	1728.93	520657	4.14201			35	9		11.1597	9.50766	0.875677	641.76	543.442	114775	6.51695													7	192		3.82664	3.0374	0.845	1952	1375.63	163921	1.33377
10	7		14.2424	12.2978	0.873813	2629.75	1887.47	2378901	3.82302			35	10		3.60854	2.89617	0.864964	660.546	564.487	21013														7	193		5.22379	4.24571	0.865936	1689.99	1284.24	270686	2.73438
10	8		6.13987	5.2313	0.896967	2189.85	1851.57	245188	3.0554			35	11		8.00383	6.83431	0.89891	626.743	540.228	44428	1.32742													7	194		4.9426	4.037	0.865703	1547.63	1284.42	133560	4.44529
10	9		4.65492	3.64294	0.830857	2387.13	1971.74	165724	3.6321			35	12		6.01031	4.97561	0.870187	653.021	566.977	31293														8	1		8.8267	7.30933	0.843439	1457.59	1214.9	249695	4.84429
10	10		5.06337	4.02897	0.841856	2518.36	1973.94	271454	2.93678			35	13		11.1337	9.26298	0.844709	694.896	579.08	100490	4.03113													8	2		4.74811	3.91325	0.884712	1457.9	1213.65	97198	1.65005
10	11		8.50283	6.85668	0.843487	2149.61	1855.92	188940	4.83439			35	14		15.5683	13.4297	0.902183	689.171	563.96	172933	6.70028													8	4		7.81595	6.6473	0.884269	1918.39	1262.86	400324
10	12		6.39357	5.34162	0.875493	2099.23	1825.44	145075	3.73455			35	15		8.30523	7.01922	0.865781	736.232	581.277	114959	2.72106													8	5		6.88335	5.69691	0.864192	1482.63	1240.56	179804	3.59984
10	13		5.1766	4.30835	0.881164	2087.88	1813.44	177781	1.82681			35	16		11.1471	9.60703	0.893541	626.725	537.412	62787														8	6		4.23583	3.44905	0.8771	1531.98	1199.17	97844
10	14		5.57622	4.61048	0.8876	2116.65	1822.29	139828				35	17		10.2381	8.73574	0.881887	639.367	525.385	113116	8.19163													8	7		6.07217	5.13006	0.888602	1463.29	1198.9	118398
10	15		9.51978	7.94811	0.862953	2099.01	1742.53	493110	3.16789			35	18		10.324	8.9	0.894774	692.419	555.737	154239	6.35792													8	8		5.43949	4.41294	0.852198	1891.41	1187.07	290055	3.07458
10	16		4.96809	4.15884	0.886163	2399.98	1851.84	298835	2.73065			35	19		4.59093	3.88047	0.902625	701.719	564.527	43571														8	9		3.36023	2.70329	0.893377	1574.48	1256.38	79843
10	17		6.71289	5.57801	0.886665	2260.4	1838.3	501093	4.09323			35	20		21.2045	18.6861	0.89736	648.161	541.727	251324	11.4988													8	11		3.87344	3.07734	0.871733	1452.74	1152.8	74439
10	18		8.63072	7.41879	0.88588	2128.43	1825.93	293411	6.43096			35	21		7.64741	6.49381	0.885534	673.393	548.944	103905	5.72947													8	12		4.05197	3.2703	0.876202	1491.87	1203.46	110504	1.47408
10	19		23.4048	20.2161	0.86311	2628.81	1866.89	2239325	11.6049			35	22		24.2751	21.2663	0.888271	674.955	539.173	538872	11.007													8	13		5.8255	4.86031	0.883623	1772.28	1292.42	346215	2.39484
10	20		4.64889	3.78612	0.866111	2593.45	1945.77	475245	2.06468			35	23		7.84071	6.52588	0.863025	651.605	536.323	69571	1.96747													8	16		7.9712	6.52503	0.848146	1389.92	1202.4	157908	4.35869
10	21		3.88303	3.21384	0.880197	3171.78	2014.89	649995	2.47055			35	24		9.58473	8.37112	0.905682	625.932	537.113	61183	5.30087													8	17		13.175	11.3677	0.874968	2226.88	1291.44	1089478	12.1911
10	22		7.28424	6.2035	0.879895	2235	1980.32	151697	5.90191			35	25		15.4001	13.1952	0.866638	620.959	526.64	94408														8	19		11.9116	10.0515	0.862666	1670.46	1303.05	324620	6.19513
10	23		5.48802	4.49006	0.856913	2300.55	1950.71	179621	3.08118			35	26		16.3124	14.2175	0.894202	607.883	515.651	126398	9.067													8	20		6.01413	4.71529	0.82987	1554.69	1250.85	127863
10	24		10.1723	8.85017	0.911582	2922.57	1980.52	1483924	1.38277			35	137		10.8482	9.17794	0.871247	664.937	564.984	69777														8	22		7.69853	6.16273	0.822264	1673.2	1325.59	180424
10	25		5.5796	4.51583	0.858195	2537.07	2041.62	588907	2.47874			35	138		9.9177	8.33352	0.858406	668.102	566.107	68079	1.55864													8	23		3.04235	2.45136	0.892022	1765.93	1354.55	85235
10	26		8.22767	6.66928	0.850654	2638.57	1977.87	778807	2.51963			36	2		8.78046	7.6207	0.904001	646.572	516.551	139189	3.94139													8	24		5.88834	4.81466	0.860212	1589.73	1258.34	141586	4.63463
10	27		3.39386	2.56634	0.858828	3369.64	2622.97	48096	1.87216			36	10		2.27639	1.73658	0.858523	589.513	537.869	3893														8	25		5.8348	4.67826	0.850039	1679	1283.94	233360	1.95311
10	28		11.5369	9.92755	0.889982	2485.81	1974.66	1299640	0.572263			36	15		17.5788	15.0429	0.849692	676.373	564.591	201473	6.58651													8	27		8.39942	7.03811	0.873521	1880.27	1306.64	382670	7.5079
10	29		9.46786	8.09694	0.884858	2426.09	1911.52	727271	1.02633			36	17		6.06478	5.04188	0.869759	620.92	548.09	20508														8	28		10.0367	8.22615	0.852933	1574.82	1249.11	324273	7.18639
10	30		8.77052	7.42684	0.88156	2162.52	1883.68	281290	4.88819			36	18		26.9686	23.5554	0.876931	641.447	523.636	405590	15.1527													8	29		9.19076	7.82134	0.885807	1968.93	1308.58	472039
10	31		3.72699	3.00652	0.877881	2417.9	1985.52	138885				36	23		6.25197	5.276	0.887094	592.486	523.358	21811														8	30		4.04695	3.06752	0.817682	1401.1	1186.34	55262
10	32		6.59398	5.36275	0.87133	2222.01	1892.69	178193				36	26		12.3342	10.5789	0.877045	669.913	548.562	147084	6.60792													8	31		12.5788	11.0107	0.900533	2542.45	1444.96	1189759	6.13601
10	34		6.61856	5.65	0.901763	2383.5	1826.78	424566	4.50524			36	27		12.2492	10.455	0.884793	648.422	529.521	116349	6.66248													8	32		4.52543	3.67505	0.885657	1763.98	1290.95	293323	1.99657
10	36		8.36422	7.07382	0.880292	2049.87	1816.95	225006	2.25447			36	28		12.3467	10.4286	0.863717	624.003	520.868	91235														8	33		8.21267	7.03044	0.89559	1451.39	1204.1	144439
10	38		8.83533	7.48735	0.890753	2179.31	1892.39	354033	1.68264			36	29		9.7691	8.17963	0.862276	663.836	525.449	174263	4.86231													8	34		8.76549	7.44334	0.88713	1459.9	1250.83	181806	1.75445
10	39		3.62217	2.84772	0.846524	3003.91	2031.22	488099	2.0468			36	30		6.28776	5.23211	0.878935	637.432	499.991	91181	3.5993													8	35		8.16091	6.41176	0.827928	2045.67	1355.88	674395	1.54049
10	41		5.14472	4.35568	0.908931	2688.5	2216.15	257278	1.72544			36	41	25	13.809	11.6664	0.870392	670.179	542.914	172823	6.30374													8	36		5.87371	4.46868	0.787622	1495.58	1257.43	98255
10	42		5.10481	4.15535	0.861164	2413.44	2075.22	225213	1.60121			36	139		21.4785	19.0677	0.901957	647.775	547.956	201066	12.1907													8	37		11.4967	9.49057	0.846867	1565.88	1222.23	325013	5.55912
10	43		6.7409	5.7176	0.881413	2735.18	1921.5	776511	2.82453			36	140		1.83739	1.37731	0.887468	611.79	535.626	6507														8	38		6.10356	5.08037	0.877345	3244.98	1429.74	994432	4.93758
10	44		4.65422	3.74503	0.861592	2640.16	2062.71	352303	3.43227			36	141		10.1146	8.6012	0.891158	695.709	594.934	74107	6.39943													8	39		2.73826	2.06896	0.83942	1569.68	1332.49	41325	2.03768
10	46		7.11211	5.9469	0.880408	2432.07	1863.58	493682	0.960734			36	142		20.5461	17.6385	0.856025	656.328	542.989	224100	6.15921													8	40		3.78431	2.92792	0.834309	1713.8	1308.63	113577	0.697542
10	47		2.4792	1.9034	0.886966	2477.76	1961.22	101479				36	143		8.96855	7.63901	0.88221	607.357	539.261	30258														8	41		3.17014	2.46001	0.85154	1743.85	1338.55	82561
10	48		2.42486	1.86588	0.876252	2763.84	2037.45	267426	1.40598			36	144		12.2475	10.4104	0.885623	635.697	539.504	88525	5.77044													8	42		2.48249	1.81761	0.81829	1383.6	1180.83	32383
10	49		6.25316	5.20539	0.879108	2683.22	1937.54	1083266	3.26677			36	145		6.53038	5.4694	0.87872	781.433	624.865	29391	3.75655													8	44		7.51544	6.31869	0.886048	1569.1	1161.99	266678	5.29041
10	50		5.22027	4.32954	0.88158	2535.03	1858.53	399068	1.31874			36	146		11.7317	9.70184	0.842742	692.629	571.788	154282	2.44862													8	45		11.0965	9.46306	0.867642	1803.87	1242.46	506879
10	51		3.95283	3.12362	0.848217	2259.13	1871.01	161166	1.57459			37	3		8.8187	7.55773	0.881014	631.572	523.67	76382	7.04684													8	46		4.87062	3.99722	0.878314	2367.58	1360.62	488573	1.3587
10	52		2.59435	2.07714	0.905177	3912.54	2086.58	535827	1.42694			37	5		11.8146	10.1492	0.896159	624.684	536.248	78261	7.29123													8	47		4.51963	3.34703	0.796608	1803.75	1448.53	74009
10	53		2.78648	2.14763	0.875589	3528.77	1951.36	533953	1.24063			37	7		10.8334	9.1418	0.863813	629.109	518.576	127820	8.00774													8	48		8.14666	6.61756	0.845453	1635.97	1384.89	137349	1.56426
10	54		4.82326	4.08209	0.918726	2390.58	1924.81	387365	1.35386			37	8		12.5362	10.6859	0.870221	607.815	505.649	156658	6.22323													8	49		15.3857	13.1345	0.875248	1513.33	1185.68	405428	11.4016
10	56		8.70352	7.30497	0.876837	2066.15	1824.01	256152	5.49908			37	9		7.11546	6.14228	0.900837	593.097	507.739	44388	4.97198													8	51		2.90051	2.24244	0.85523	1749.12	1294.57	99863	2.25741
10	58		4.0019	3.27476	0.898195	2113.5	1821.56	114114	1.31108			37	10		14.5873	12.6304	0.876878	622.004	503.364	182632	7.06368													8	53		5.96891	4.81896	0.858732	1424.12	1200.2	94703
10	59		9.67568	7.62685	0.822214	2186.75	1837.29	366420	5.25922			37	11		4.22303	3.5422	0.893963	589.236	501.797	22350														8	54		22.0528	18.6777	0.856782	1859.04	1254.84	1245105
10	60		10.2474	8.73229	0.879452	2237.45	1814.23	519062	0.551061			37	13		10.4158	9.06419	0.905663	606.678	508.844	90502	3.4344													8	55		10.551	8.63189	0.843563	1492.88	1218.58	262751	8.75833
10	61		6.95864	5.84495	0.883088	2344.96	1884.04	568459	3.86952			37	14		10.3282	8.97014	0.896511	595.251	498.082	91640	3.85842													8	56		3.84472	3.10448	0.88629	1711.36	1241.02	169496	1.0229
10	62		7.44492	6.1932	0.871566	2159.59	1784.15	606602	4.5358			37	15		4.68012	3.64565	0.826473	595.894	495.367	29613														8	57		5.89768	4.71742	0.855181	1557.15	1189.91	161145	2.15259
10	64		4.04982	3.31813	0.896105	2270.6	1850.12	350904	2.90888			37	16		8.19556	6.76502	0.862708	560.625	486.853	31879	3.0678													8	58		7.65835	6.23531	0.85194	2291.35	1281.58	596621	2.83613
10	65		7.9929	6.63554	0.875361	2651.45	1941.68	802826	2.8192			37	147		10.3724	8.65801	0.853768	621.769	524.819	74644	4.83082													8	59		2.3013	1.78964	0.885284	1435.77	1231.49	29494
10	66		13.6829	11.4945	0.861034	2297.56	1699.31	1121588	9.02204			37	148		26.6319	23.036	0.877436	620.459	522.253	242325	19.1998													8	60		8.36019	6.93047	0.870673	1542.63	1234.06	200468	6.15151
10	69		10.5502	8.77919	0.855484	2175.07	1784.25	496658	7.64212			37	149		18.2879	15.8817	0.895311	634.442	528.931	257985	12.7418													8	61		6.95038	5.51018	0.846033	1605.99	1230.22	266361	1.1659
10	70		9.35094	7.75353	0.857224	2209.57	1722.58	606709	0.326039			37	150		14.4161	12.232	0.8854	614.83	540.102	64309	6.74379													8	63		6.54198	5.31737	0.850448	1615.91	1205.73	208692
10	71		7.6713	6.38666	0.849137	2042.36	1761.71	220515	4.20878			37	151		15.8137	13.4962	0.879243	622.033	514.327	161400	11.9133													8	64		9.45999	7.53818	0.827237	1910.14	1284.76	606612	0.983887
10	72		4.36548	3.60001	0.891404	2262.77	1760.13	198359	2.03911			37	152		2.15724	1.54656	0.820853	627.978	546.5	9088														8	67		3.68342	2.98491	0.888695	2898.07	1587.31	377818
10	73		7.21112	6.06987	0.883682	1970.84	1692.49	274835	4.02104			37	153		23.376	19.7699	0.864734	623.569	512.946	269012	14.4905													8	68		3.49405	2.73374	0.84232	2151.32	1646.56	103129
10	74		7.70323	6.25833	0.853983	2108.21	1735.77	328573	0.328295			38	1		16.8686	14.4639	0.878299	605.002	507.982	149590	10.3122													8	69		4.19108	3.24866	0.869329	1607.9	1275.17	135937	1.50942
10	75		4.25267	3.50354	0.890364	1899.46	1673.52	89933	3.13621			38	3		6.19195	5.1146	0.862028	610.498	510.044	39283														8	195		7.25842	5.87489	0.854323	1912.08	1411.09	285387	5.7288
10	76		3.46192	2.76421	0.87006	2419.11	1742.99	191175				38	9		5.61816	4.63212	0.863715	588.982	517.987	21478														9	1		3.82108	3.1637	0.892583	1503.26	1244.67	84584	1.66396
10	77		4.70383	3.89964	0.894787	2129.13	1694.72	218663	3.47031			38	21		8.96464	7.7141	0.887078	585.673	511.377	34909	4.55206													9	2		8.6629	7.29592	0.870186	1480.63	1226.63	161146
10	135		12.3347	10.3631	0.868746	2408.79	1809.89	1214026	9.01218			38	22		34.8598	30.9224	0.888213	602.708	501.805	348500	23.1135													9	3		21.7462	18.4138	0.866623	1695.23	1212.71	930642	17.5847
10	136		1.90938	1.43165	0.844687	2844.12	2118.22	211957	0.695803			38	30		8.20979	7.01179	0.894475	615.284	519.988	62609	4.66698													9	5		8.23571	6.88989	0.876483	1669.35	1275.82	254016
10	137		2.66579	2.06581	0.845001	3406.53	2305.78	397251	2.19182			38	31		9.85128	8.45454	0.890733	588.714	502.804	51616														9	6		10.2104	8.62278	0.88256	1742.8	1349.16	321389	6.77359
10	138		8.48464	7.08996	0.858434	2377.3	1917.05	925273	3.493			38	32		15.7744	13.7566	0.890629	575.201	490.292	103353	12.5706													9	9		5.79135	4.48392	0.815614	1887.55	1262.92	271572
11	1		6.78904	5.65978	0.867195	1932.09	1665.11	280904	1.34592			38	34		8.53597	7.10477	0.858131	612.621	503.554	118777	3.30636													9	10		4.41436	3.44138	0.836456	1483.1	1317.08	43960	2.40261
11	2		3.32941	2.61089	0.869865	2826.18	1901.28	511145	1.97443			38	35		15.5503	13.5924	0.88541	572.746	493.414	119908	11.3412													9	11		9.45864	8.12219	0.894166	1635.39	1294.1	372226	8.74645
11	3		8.8744	7.64129	0.893809	2014.35	1761.03	256638	7.33668			38	36		13.3067	11.5823	0.893684	561.27	479.967	76740	5.44695													9	12		6.09531	4.87663	0.860423	1612.71	1279.48	201509	4.97873
11	4		2.59132	2.06677	0.867459	2119.64	1760.9	73333				38	37		16.4361	14.9143	0.934474	624.903	505.935	211687	5.00358													9	13		19.9006	16.633	0.857893	1648.68	1251.04	602500
11	6		6.28651	5.37469	0.900504	2125.46	1787	212534	3.71139			38	38		5.07478	4.38077	0.927649	676.267	503.432	107211	2.69676													9	15		6.01461	4.80945	0.854077	1617.24	1303.92	337999	3.91691
11	7		10.0628	8.89969	0.918777	2177.74	1828.29	395983	9.39275			38	39		17.9462	15.2349	0.862946	564.282	495.336	69105	11.8384													9	16		6.34576	5.3709	0.898036	1405.98	1209.19	112483	2.66451
11	8		5.70461	4.82747	0.912118	2581.57	1910.1	786023	3.81446			38	40		8.76404	7.27199	0.874792	592.376	487.626	61206														9	17		7.15566	5.94664	0.878434	1827.29	1375.8	331694	2.18985
11	9		4.77528	4.05854	0.908061	2148.03	1830.11	175645	3.37283			38	154		10.0445	8.47713	0.868112	980.766	619.317	224105	3.06017													9	18		9.38373	8.05613	0.90294	2301.55	1397.45	1143488	1.05678
11	10		6.75485	5.64088	0.879958	2159.56	1808.46	470418	2.40217			38	155		11.2775	9.71898	0.878408	558.592	487.22	52124	4.92218													9	19		2.04785	1.52177	0.852201	1583.84	1287.25	41460
11	11		12.2773	10.5902	0.889872	2086.65	1781.97	543222	1.08646			38	156		8.28694	7.14615	0.911723	589.676	503.021	57375	4.37675													9	20		5.75948	4.71217	0.861323	2001.21	1270.4	446048	0.675522
11	12		14.5757	12.8141	0.887416	2766.14	1829.09	1691835	1.35573			38	157		15.5933	13.4274	0.879417	594	524.055	57974	6.5305													9	21		4.78716	3.94905	0.896761	1626.72	1317.41	202296	0.949667
11	15		2.69212	2.11417	0.884849	2306.91	1939.05	84671	2.26343			39	1		17.0597	14.7765	0.884341	634.992	525.636	167273	5.52607													9	22		5.61364	4.71589	0.901382	1814.89	1284.03	247036
11	16		7.48955	6.05285	0.863949	2960.52	2136.54	1001365	0.691197			39	4		7.78611	6.80843	0.906549	593.109	523.725	29087														9	23		8.1884	6.75739	0.864875	1557.6	1267.79	291852	6.45051
11	17		4.70956	3.80543	0.864073	2165.17	1850.83	263179	1.15149			39	7		14.3993	12.215	0.85723	616.031	534.707	89846	7.65146													9	196		10.953	9.07306	0.845071	1902.73	1337.39	625533	2.87576
11	18		4.30785	3.31135	0.803053	2916.07	2136.24	541326	1.70284			39	8		14.4061	12.3935	0.878295	620.591	535.838	74762														9	197		15.7867	13.1562	0.845028	1649.26	1290.26	555818	10.2437
11	19		15.6551	13.991	0.921364	3145.62	2123.98	2754145	1.87176			39	9		16.9258	14.7524	0.886363	655.645	546.309	237711	12.3786													9	198		12.3834	10.282	0.845011	1741.32	1321.19	477549	1.30925
11	21		9.29216	7.56229	0.844991	2112.04	1784.9	289173	4.44527			39	11		22.3397	18.9374	0.862277	661.548	544.076	300092	11.7839													9	199		2.17748	1.65781	0.845	1422.57	1246.58	21825
11	22		4.40822	3.59796	0.883808	2441.84	1857.26	292659	0.93853			39	12		9.19652	7.92319	0.896638	637.175	536.427	69892	5.99528													9	200		8.24282	6.78099	0.845055	2198.59	1350.43	1167132	2.19017
11	26		6.02291	5.09269	0.9031	2215.07	1786.81	325804	0.386904			39	13		6.08166	5.1395	0.885301	617.201	520.204	39028														10	1		5.93188	4.95446	0.867734	1450.63	1244.54	112729	1.34585
11	27		5.40999	4.74838	0.932588	4998.42	2299.14	2143230	2.77865			39	14		8.73809	7.50349	0.88779	623.131	522.956	75212	4.33776													10	2		10.8377	9.16542	0.86475	1518.85	1233.3	235393	4.86356
11	28		6.09222	5.04298	0.871431	2195.95	1818.63	489317	5.22308			39	15		3.53451	2.88717	0.923472	701.303	530.196	52975	2.0043													10	3		9.21071	7.99575	0.892337	1832.67	1336.46	623530	1.13901
11	29		7.22762	5.92714	0.861514	2234.98	1813.1	801460	2.50836			39	16		15.4422	13.308	0.881743	606.504	521.063	92512	8.32485													10	4		9.24825	7.90774	0.873814	1561.42	1224.5	244576
11	30		5.28275	4.4776	0.910274	2948.52	2005.7	1184784	2.95209			39	17		9.14653	7.65154	0.871522	672.237	525.161	123844	2.93928													10	5		7.54932	6.17891	0.836699	1679.49	1264.1	237969	5.77328
11	32		9.38186	8.10089	0.895523	3065.27	1998.3	2364766	1.2901			39	18		22.5744	19.4364	0.894	662.303	529.006	358694	9.86072													10	6		6.55163	5.53247	0.886024	1709.19	1253.92	308355	2.95168
11	33		4.51646	3.65442	0.863889	1977.91	1767.81	73262				39	19		10.6003	8.82378	0.874668	614.973	528.026	54517														10	7		8.40625	6.86753	0.843476	1426.8	1236.99	147052	4.57165
11	34		8.44224	7.07157	0.871235	2024.85	1742.55	366288	3.98943			39	21		7.26518	6.19772	0.883228	588.977	511.979	34475	5.90268													10	8		4.99821	4.11502	0.872621	1723.42	1249.72	187200	1.77765
11	36		5.65369	4.67771	0.891909	2289.56	1836.48	523514	3.73949			39	22		15.2375	13.2813	0.889071	623.42	502.848	181886	6.05192													10	9		6.22457	5.17084	0.894011	1601.68	1249.85	160285
11	37		3.22369	2.64071	0.888181	2276.5	1800.63	154286	1.83828			39	24		15.8494	13.3628	0.865525	603.212	505.637	124855	5.47469													10	10		9.9408	8.3161	0.858486	1973.33	1276.52	607599	1.51366
11	38		3.92357	3.18082	0.880897	2175.05	1778.91	183135	1.16801			39	25		14.3596	12.0447	0.851933	618.267	501.12	179713	7.08681													10	11		5.03935	4.07717	0.869792	1534.64	1253.29	120595	2.4051
11	39		6.08505	5.12237	0.899848	2020.17	1755.89	200527	2.73894			39	26		4.86014	4.21175	0.931113	595.969	506.499	27046														10	12		13.7259	11.6718	0.868733	1483.91	1196.53	299507
11	40		6.57629	5.53629	0.870434	2360.37	1797.3	553995	2.64098			39	27		13.1747	11.192	0.887745	601.85	498.045	116749	3.7822													10	13		4.06154	3.36112	0.897213	1534.99	1189.66	102341
11	41		4.7583	3.9296	0.881804	2684.32	1910.67	673986	1.65665			39	158		20.4177	17.4554	0.870508	632.001	517.071	226632	15.1156													10	14		4.96146	3.94969	0.846059	1381.25	1186.88	63998
11	42		6.52728	5.48098	0.88668	2008.45	1674.72	240115	5.10686			39	159		15.6998	13.5089	0.878725	641.509	527.579	183335	7.19438													10	15		21.9506	19.1152	0.89061	1591.13	1205.24	693675
11	43		5.086	4.19556	0.880825	2127.2	1835.93	105988	1.50683			39	160		2.27593	1.73641	0.845001	619.216	555.441	4826														10	16		15.5127	13.1787	0.887365	1434.66	1234.44	362993	13.0088
11	44		11.5708	9.84355	0.895122	2458.93	1791.02	1478884	8.45093			39	161		13.6295	11.5413	0.881192	646.551	524.471	134695	5.83585													10	17		6.46573	5.31353	0.847888	1458.37	1284.35	56393
11	46		6.33414	5.38265	0.898942	2254.32	1788.31	394997	1.30766			40	6		6.88759	5.79842	0.878558	658.022	562.02	40550														10	18		6.66198	5.34496	0.841937	1502.51	1255.58	128565	1.93523
11	47		7.70548	6.32055	0.856429	1957.28	1733.99	175375	5.96061			40	7		8.50353	7.12685	0.868556	671.854	550.454	113420	2.47794													10	19		3.96526	3.15704	0.854787	1461.67	1109.34	96250
11	49		5.56667	4.69863	0.917824	2220.01	1832.22	308881	1.98564			40	8		9.6695	8.30375	0.891643	638.566	520.073	137456	6.71828													10	20		4.69887	3.56489	0.807291	1428.6	1253.95	52689	1.97512
11	51		5.59525	4.67693	0.896673	2253.02	1759.78	282651	4.65344			40	9		15.0885	13.2634	0.894795	641.781	543.661	137665	8.38141													10	21		5.32174	4.31952	0.88223	1474.46	1236.27	75070
11	52		6.80843	5.83867	0.916802	2577.05	1751.76	771330	1.33633			40	10		7.1197	5.94738	0.874546	626.211	508.614	73469	4.59665													10	22		8.02592	6.78023	0.880072	1409.16	1141.84	251263	4.06062
11	53	14	5.48956	4.31839	0.841371	2373.91	2007.76	145511				40	11		11.0292	9.32166	0.864847	674.412	541.653	155923	4.62803													11	4		9.37917	7.90512	0.866859	1762.01	1374.8	412351	4.30126
11	85	14	2.26135	1.52243	0.80072	3570.99	2272.81	167032				40	12		6.0484	5.05479	0.878472	644.688	531.339	57423	3.77235													11	8		4.37974	3.57715	0.885829	1688.82	1331.78	106389
11	139		3.4268	2.71483	0.845	2026.96	1803.22	67718	1.42205			40	13		7.96044	6.71149	0.863299	632.954	533.973	51296														11	11		8.33659	6.99524	0.871512	1725.84	1342.9	224451
11	140		14.8005	12.5773	0.875253	1991.19	1751.06	397786	11.1031			40	14		15.167	13.1508	0.889802	654.527	545.895	135299	6.67762													11	12		6.72985	5.64771	0.883604	1707.95	1340.98	170952
12	1		7.84383	6.57658	0.87828	1986	1711.69	213106	0.514364			40	16		13.1425	11.6998	0.909997	606.048	507.774	114337	3.75478													11	14		9.0519	7.66675	0.869253	1569.38	1354.45	111216	5.13119
12	2		4.34134	3.57336	0.890021	2056.37	1711.1	185175	2.19132			40	17		10.1356	8.89842	0.900607	585.823	517.913	34988														11	15		3.07818	2.48533	0.892679	1719.59	1376.85	76773	0.991714
12	3		5.50208	4.46353	0.850248	2045.58	1746.45	253410	3.47562			40	18		4.35588	3.51898	0.883223	583.538	500.075	18084														11	16		8.34665	6.9381	0.854304	1593.03	1368.5	164728	2.64382
12	4		4.58385	3.8174	0.89337	2034.91	1743.42	197128	3.27555			40	162		16.7505	14.2524	0.852936	649.511	542.583	148352	11.3167													11	18		5.77493	4.75397	0.858911	2166.88	1550.34	379002	0.718458
12	5		3.03225	2.36075	0.842196	2126.14	1807.21	75701	1.52323			40	163		7.20199	5.84614	0.841176	687.588	560.712	94528	4.98415													11	19		5.16759	4.39153	0.893709	2000.85	1432.95	281418	0.616819
12	7		4.92832	4.04073	0.868109	2017.29	1746.58	174167	2.66789			40	164		16.8613	14.4444	0.871834	670.821	555.109	187632	7.12657													11	20		9.39668	8.05011	0.88635	1605.34	1386.87	199229	6.51778
12	8		11.6816	10.2331	0.885334	2579.16	1782.47	1493630	2.54028																									11	21		13.8165	12.0705	0.890302	1826.09	1388.12	514389	4.85809
12	9		5.30092	4.28071	0.852325	3112.77	2083.37	572513	1.14921																									11	22		8.44259	7.19606	0.875463	1631.39	1403.64	199533	4.3526
12	11		3.24801	2.53872	0.853529	1883.53	1718.56	44447	1.89321																									11	23		4.25168	3.54263	0.895595	1694.56	1353.03	100061	2.31864
12	15		6.48593	5.37241	0.850333	2564.32	1899.37	541351	1.91264																									11	24		9.92289	8.41019	0.870108	1797.35	1352.64	413700	1.89592
12	17		12.0391	10.2305	0.865975	2385.83	1876.01	571207	2.59469																									11	25		8.36863	6.96599	0.857449	1883.21	1415.39	518611	5.07551
12	18		5.24382	4.26926	0.873242	2175.97	1782.53	286022	3.54449																									11	26		19.3557	16.0936	0.836641	1887.05	1389.73	837732	4.76637
12	20		4.01657	3.3223	0.897073	2103.21	1801.03	171751	2.36496																									11	27		10.6537	8.86975	0.855025	1896.02	1340.96	458964
12	23		6.36621	5.14545	0.843468	2336.82	1981.15	313375	4.34583																									11	28		3.01924	2.37576	0.86295	1982	1413.58	154680	1.98766
12	28		8.15784	6.74459	0.859433	2261.14	1968.25	182260	3.9283																									11	29		8.62161	7.08182	0.855832	1543.05	1354.44	104486	3.59037
12	29		10.1061	8.29929	0.830352	2676.45	1904	863372	1.44791																									11	31		4.90208	4.05815	0.885846	1734.29	1326.6	179520	3.36061
12	30		8.16298	6.88001	0.883265	2028.76	1786.18	217329	5.03897																									11	32		11.0954	9.58308	0.88889	1796.93	1378.55	354423	5.95713
12	31		8.93308	7.69299	0.898338	2261.23	1829.53	384063	3.46017																									11	35		3.42221	2.71712	0.877582	1790.27	1443.84	65500
12	34		8.74808	7.46265	0.871521	3004.57	1826.22	1805548	5.12476																									11	36		19.3717	16.5986	0.869421	1731.89	1340.17	604270
12	35		10.4824	9.13494	0.891447	1903.99	1684.68	248846	5.44178																									11	37		14.3987	11.955	0.853032	1532.48	1275.49	357008	11.4703
12	36		19.4409	17.1194	0.900602	2309.37	1825.68	2495050	15.3729																									11	38		9.71538	8.01084	0.870971	1828.92	1374.02	298246
12	37		7.27232	6.24972	0.905992	3244.58	1917.55	1340123	5.27945																									11	39		14.3541	12.2898	0.880529	1724.97	1372.29	428179	11.6183
12	40		5.56896	4.61136	0.883759	2040.41	1778.06	156840	1.69029																									11	40		6.96088	5.75978	0.864012	1629.51	1334.47	262840	1.08912
12	42		3.93382	3.17623	0.881311	2525.35	1976.58	295715	2.01252																									11	41		6.71005	5.3419	0.812262	1625.58	1395.14	179942	4.86644
12	43		4.58051	3.80026	0.892577	1980.74	1719.37	156084	1.71996																									11	42		7.89579	6.88641	0.909682	3164.03	1468.31	1358184	3.40535
12	44		14.4438	12.0819	0.857157	2934.06	1796.05	2350316	6.85339																									11	43		5.19678	4.27041	0.868514	2158.95	1308.13	391281	2.52597
12	45		5.17853	4.33281	0.880604	2413.2	1799.46	368051	1.75432																									11	44		2.8721	2.19279	0.858733	1744.86	1364.26	77211
12	46		4.47352	3.64169	0.882697	2139.15	1827.78	271368	2.57356																									11	47		7.51049	6.27972	0.889362	2294.42	1417.81	458867
12	47		4.71776	3.8972	0.894288	2588.37	1929.79	567294	1.79076																									11	48		12.1843	10.3064	0.869986	1638.05	1275.63	367644
12	48		7.35922	6.25155	0.8844	2376.93	1845.66	850675	4.62546																									11	111	46	5.0953	4.02136	0.839456	1631.14	1319.06	144524	2.90047
12	49		8.23471	6.75147	0.857486	2131.03	1785.25	529380	4.07089																									11	201		11.5852	9.94574	0.867894	1897.87	1461.74	372692
12	50		10.6624	9.12552	0.886648	3163.35	1886.04	2093664	3.75088																									11	202		5.81179	4.78453	0.873909	1649.96	1413.7	122502	3.02044
12	52		6.06511	5.05325	0.887643	1980.93	1790.88	113517	1.75452																									11	203		3.42318	2.70982	0.844999	1968.07	1535.26	104195	0.972931
12	53		7.10391	5.66474	0.838665	2107.32	1703.69	324734	4.13685																									11	204		3.5372	2.80701	0.845	1688.42	1453.08	73187	1.24367
12	54		7.96373	6.71112	0.87764	2168.13	1701.21	587329	6.85258																									12	1		5.16791	4.30263	0.873439	2225.69	1353.31	379832
12	57		9.94524	8.44394	0.870492	2067.72	1847.82	183431	3.65965																									12	2		4.45123	3.71255	0.891703	2410.46	1429.54	405923	2.43268
12	58		5.03534	4.10201	0.876005	2700.18	1959.68	712774	2.4641																									12	3		6.4669	5.40642	0.880687	1673.61	1321.73	185300	3.29727
12	60		5.15625	4.34142	0.900656	3408.64	2161.96	1289654	1.81157																									12	4		5.75871	5.02956	0.915084	2055.74	1393.54	301750
12	61		8.35034	7.02728	0.870969	2042.01	1724.85	437165	5.54405																									12	5		9.2703	7.93593	0.891141	1960.46	1486.94	227000
12	66		7.39388	6.24153	0.897146	2170.88	1882.53	356333	1.71981																									12	7		5.10991	4.24957	0.879152	2033.41	1339.98	339342	3.43375
12	67		7.52342	6.32041	0.883397	2540.04	1827.86	752719	1.50347																									12	8		18.6836	16.0797	0.872266	1948.25	1365.61	1541004	1.30369
12	70		5.88949	4.66216	0.822088	2340.37	1901.06	251456	2.87743																									12	9		14.1164	12.3092	0.894088	2022.02	1380.39	726770
12	73		9.8438	8.29127	0.87101	1957.79	1645.05	459551	2.7879																									12	10		4.82566	3.86721	0.868496	1871.26	1391.69	191746	2.76543
12	75		11.1502	9.59539	0.885895	2440.78	1748.86	923455	2.23223																									12	12		8.34879	7.30009	0.912917	2038.05	1365.88	452162
12	78		9.64478	8.16653	0.884878	2636.7	1807.67	1520751	5.5653																									12	13		2.76491	2.20209	0.898535	1804.05	1386.49	80565
12	80		3.97823	3.24963	0.886777	2378.54	1891.64	345727	2.87466																									12	14		6.01683	5.01075	0.883416	1600.46	1291.35	142974
12	82		3.92992	3.09415	0.858655	2352.79	1754.47	452995	2.10988																									12	15		10.456	8.89705	0.877088	1612.43	1361.28	283944	5.24561
12	83		5.11864	4.34558	0.900372	1970.4	1745.67	158068	1.43735																									12	16		12.5697	10.7486	0.883436	1751.95	1359.42	426163
12	85		4.58718	3.6929	0.865824	2077.39	1743.34	216934	1.70069																									12	17		3.31231	2.58042	0.862369	1700.39	1381.97	73692
12	88		7.46151	6.3028	0.886397	1976.42	1615.17	369336	3.76869																									12	18		4.2612	3.28272	0.84614	5055.04	1990.86	1013008
12	141		7.85424	6.45003	0.845014	2445.95	1920.66	721418	5.52415																									12	19		15.6364	13.34	0.8759	1780.87	1335.19	592251
12	142		4.95607	4.0057	0.84507	2475.66	1889.67	575339	0.335264																									12	20		9.66	8.00111	0.861582	1594.12	1343.9	297479	4.25709
12	143		8.78844	7.6914	0.925302	2403.98	1911.51	597834	2.19122																									12	22		4.86879	4.09268	0.89774	1719.83	1258.88	198108	2.8109
13	1		6.58232	5.68129	0.89675	2044.44	1631.03	374143	1.04658																									12	23		3.47438	2.81986	0.898707	1769.8	1299.44	110951
13	2		5.18992	4.4176	0.905407	2011	1693.57	207631	3.03181																									12	25		4.78163	3.93019	0.887232	1773.07	1328	143093
13	3		5.01908	4.19479	0.886899	2988.88	1903.33	1367963	2.96433																									12	114	24	4.60748	3.65098	0.853328	1499.01	1294.76	75213	4.29765
13	4		5.17938	4.36249	0.896811	1896.84	1619.94	193793	1.43862																									12	113	24	2.2332	1.59531	0.844744	1493.01	1329.81	23146	1.94271
13	5		3.85615	3.16973	0.888796	2663.11	1897.49	466486	2.91441																									12	205		5.46572	4.38939	0.831672	1614.54	1353.04	124556	2.05729
13	6		5.90211	4.97056	0.886878	1904.66	1647.22	157090	3.87406																									12	206		2.40763	1.83776	0.845	1781.04	1328.9	77818
13	7		9.88077	8.59955	0.907004	2601.41	1742.57	871007	2.77857																									12	207		7.24401	5.98199	0.872587	1765.61	1332.29	197617	3.14662
13	8		3.46263	2.92649	0.916967	2954.23	1885.88	602420	1.82869																									12	208		8.37311	6.79966	0.824677	1431.49	1246.71	155047	3.81565
13	9		8.74384	7.4073	0.873765	1839.35	1665.47	137449	5.55805																									13	1		4.58397	3.74917	0.881089	1580.48	1264.34	83850
13	11		30.8063	26.8258	0.880976	2091.04	1703.88	3802565	27.7783																									13	2		3.07344	2.43187	0.86972	1501.51	1256.52	47917
13	13		3.15171	2.53253	0.878421	5298.53	2130.22	1168446	1.04302																									13	3		5.76218	4.68964	0.852495	1448.23	1267.09	94973	4.01088
13	14		6.49686	5.36241	0.879544	2080.72	1840.75	145356	2.34181																									13	5		3.59966	2.9118	0.876718	1527.38	1327.46	62145	2.22716
13	15		6.71576	5.66549	0.888469	1909.59	1602.84	277976	4.86427																									13	6		5.52863	4.65578	0.893771	1478.55	1281.69	101185	1.34077
13	16		7.89105	6.51108	0.866402	1875.19	1644.78	215524	3.31945																									13	7		20.0857	17.6504	0.891464	1753.54	1370.9	565080	14.8371
13	17		15.9378	14.1482	0.909589	2024.29	1733.38	807609	10.909																									13	8		3.47446	2.84058	0.885638	2171.26	1432.04	165228
13	18		8.09985	6.68612	0.849958	2025	1694.08	532721	1.04174																									13	11		17.7341	14.9551	0.860898	1820.04	1309.3	937575	5.91611
13	19		4.46297	3.57939	0.872563	1967.57	1692.2	94788																										13	14		9.13111	7.90663	0.895931	1824.22	1374	385905	4.21875
13	20		5.18173	4.24838	0.881888	2310.72	1765.58	516328	2.27143																									13	15		6.64371	5.52587	0.870155	1597.05	1324.96	234166	2.51097
13	21		5.81379	4.89745	0.894608	2352.38	1742.99	529931	3.66707																									13	16		7.01038	6.01051	0.902528	1719.12	1381.8	211507	5.01132
13	22		3.67957	2.96317	0.862261	2482.08	1755.08	461942	0.731294																									13	17		2.42397	1.9104	0.885879	1573.16	1265.59	43292
13	23		4.37687	3.61901	0.881088	2090.21	1772.03	162886	3.05909																									13	19		8.00589	6.85376	0.898279	1755.78	1379.63	464989	4.26927
13	24		3.73474	2.8651	0.837694	2098.66	1740.16	242699	1.54454																									13	20		15.8513	13.3948	0.866751	1749.43	1324.31	710683	5.24397
13	26		6.9172	5.67637	0.860426	2136	1701.7	540479	2.25789																									13	21		8.99734	7.73794	0.894468	1810.65	1332.23	308058
13	27		7.50725	6.21522	0.85431	2047.01	1694.73	172825	3.63337																									13	22		3.28535	2.58792	0.860889	1844.72	1386.11	112320
13	28		10.4713	8.66511	0.862593	2588.19	1694.08	1294693	2.32015																									13	23		11.8315	10.1697	0.882975	1987.23	1348.14	816896	8.85533
13	29		17.6139	14.437	0.840544	2369.81	1696.74	1623593	10.1964																									13	24		9.74711	8.3565	0.895153	1938.17	1372.64	460607	8.5496
13	30		10.8683	9.18794	0.880793	2145.98	1720.12	982692	1.3083																									13	25		9.01076	7.42499	0.85871	1769.87	1437.9	450458	6.56469
13	31		10.3646	8.8157	0.892001	2299.18	1727.01	1292910	7.85883																									13	26		7.635	6.27978	0.854457	1736.04	1361.9	218789
13	32		5.53023	4.50514	0.845664	2036.44	1775.41	223769	3.53476																									13	27		6.81118	5.81979	0.90352	1721.48	1393.53	186880	1.44872
13	33		11.3862	9.72386	0.882099	1995.58	1742.98	247929	4.66859																									13	29		17.3055	15.0006	0.882329	2035.53	1343.22	1407084	2.90135
13	34		5.55298	4.64744	0.879459	2071.85	1620.21	281354	1.66692																									13	30		4.15232	3.4104	0.899105	1801.67	1382.42	173038	2.32743
13	37		4.79934	3.86925	0.862054	2098.51	1663.06	178890	2.56425																									13	31		12.8768	11.0841	0.89518	1686.46	1412.38	216321
13	38		6.74467	5.51094	0.859086	2111.94	1643.12	777901	4.70012																									13	32		5.21999	4.17929	0.859663	1816.28	1360.28	183598
13	39		6.51783	5.62825	0.92357	7150	2524.87	3269461	4.20345																									13	33		6.91729	5.80722	0.88517	1720.52	1365.88	431120	1.86261
13	40		6.582	5.40621	0.862444	1975.44	1497.79	375390	2.03775																									13	34		4.79612	3.91256	0.877717	2096.73	1434.95	169724
13	144		7.88876	6.48348	0.845049	2201.82	1766.99	519860	4.59594																									13	35		2.73719	2.08502	0.86408	1863.33	1351.91	91411
13	145		4.6351	3.73249	0.845	2474.32	1926.79	106170	0.869469																									13	37		10.1085	8.62343	0.891533	1730.82	1357.03	288353
14	3		9.49507	8.22258	0.888945	2079.27	1739.32	388175	4.45591																									13	38		5.80701	4.9009	0.90102	1449.09	1268.36	66527
14	4		6.04987	4.99109	0.865137	2049.94	1757.95	183700	0.815727																									13	39		6.20456	5.27386	0.896095	2197.8	1336.41	900111	4.00844
14	5		8.31283	7.1651	0.896387	1977.35	1714.25	269847	2.99073																									13	40		8.46942	6.92485	0.860464	1529.76	1211.87	195382
14	6		4.63433	3.76375	0.862039	1835.21	1678.08	52103																										13	41		6.73541	5.57594	0.868876	1552.33	1272.82	216698	1.75167
14	7		8.37325	7.21625	0.899673	2107.87	1707.42	295024	2.06869																									13	116	13	2.90928	2.26218	0.87096	1607.31	1330.92	50820
14	8		14.2863	12.9456	0.921682	3017.5	2048.24	2533339	1.98346																									13	115	13	13.4888	11.4639	0.871632	1725.19	1319.32	448430
14	9		7.50528	6.27875	0.872391	2246.66	1818.31	648137	3.58851																									13	209		3.84667	3.06579	0.844999	1905.8	1397.08	125826
14	10		10.2444	8.86119	0.895302	2241.44	1678.28	621384	2.25225																									13	210		9.5526	8.0161	0.884215	2338	1387.19	760710	8.35983
14	11		6.20871	5.21438	0.870225	2060.33	1748.1	186417	1.06008																									13	211		7.96262	6.6563	0.865053	1680.3	1377.27	274576	2.66445
14	12		5.36635	4.62192	0.907556	2239.66	1775.79	344753	0.902307																									13	212		4.10113	3.28048	0.845	1734.44	1416.94	81466
14	13		10.44	8.83815	0.871035	2038.88	1699.85	345129	4.95905																									13	213		3.74057	3.01005	0.878572	1874.64	1377.22	130302
14	14		8.54454	7.18815	0.855444	1980.02	1733.22	210567	0.543551																									14	1		6.00543	5.09676	0.888695	2111.31	1412.42	491374	2.58498
14	15		15.886	13.965	0.898715	2370.15	1802.48	1419287	6.42205																									14	3		4.91579	4.10255	0.890725	1761.97	1333.93	167538	3.30061
14	16		5.54745	4.59366	0.875449	2160.42	1786.05	269685	1.28602																									14	4		10.7722	8.99963	0.855489	1455.02	1282.03	187358	4.63655
14	17		3.82265	3.03108	0.871237	2018.27	1733.04	139067	2.39071																									14	5		16.0203	13.9435	0.880271	1678.89	1257.61	620462	9.6724
14	18		10.3894	8.75768	0.857469	2288.98	1755.11	775051	4.09949																									14	6		9.77413	8.26436	0.879436	1553.95	1270.52	216951	2.82407
14	19		8.35946	6.9027	0.854186	2294.72	1949.73	244403	3.42279																									14	7		12.2605	10.6361	0.875921	1995.78	1374.42	768424	5.78795
14	20		3.59826	2.94299	0.900465	2071.9	1700.05	192973	1.98541																									14	9		2.95596	2.34906	0.888535	1552.54	1262.57	52287
14	21		4.5747	3.77425	0.88555	1957.57	1717.41	106351	3.99719																									14	10		5.63988	4.77745	0.889117	1552.11	1284.42	113399
14	22		4.17225	2.99374	0.757421	3091.03	2326.94	160339	1.74212																									14	11		4.42916	3.43479	0.840653	1781.37	1393.82	120285	2.99956
14	23		4.76751	3.56111	0.778648	3205.5	2146.47	554826	2.01754																									14	12		7.67743	6.3827	0.856596	1806.2	1282.8	337311	2.02325
14	24		5.40394	4.6379	0.916287	2079.45	1738.39	235620	2.01234																									14	13		2.72373	2.11914	0.87968	1955.16	1355.34	145888	1.64607
14	25		4.56206	3.7743	0.881335	2378.15	1843.51	441746	2.72951																									14	14		26.8563	23.4552	0.887187	1652.4	1264.65	879678
14	26		4.95239	4.13661	0.894957	2015.22	1715.83	164097	2.71494																									14	15		3.02914	2.28444	0.816739	1483.43	1320.44	24377
14	27		3.53053	2.8026	0.88009	2178.48	1779.99	155740	1.43652																									14	16		5.95539	5.12229	0.921561	2111.31	1359.56	461432	1.34461
14	28		5.7602	4.59491	0.825505	1977.77	1759.36	90150																										14	17		15.3772	13.3006	0.875977	2142.26	1327.97	1414738	13.5405
14	29		8.78736	7.36389	0.872559	1980.23	1806.3	135182	5.22432																									14	18		2.05602	1.53144	0.883321	1911.27	1288.71	82557
14	30		8.67798	7.48552	0.895101	2222.28	1818	955239	6.85377																									14	20		8.08044	6.80708	0.884838	1817.08	1365.22	339852	2.33785
14	31		9.15304	7.37969	0.836612	2018.34	1739.04	343926	3.2324																									14	21		6.32571	5.28544	0.889214	1817.83	1324.61	240039
14	32		2.70141	2.14115	0.865618	2905.57	1880.88	427190	1.31433																									14	22		8.42193	6.93241	0.857096	1958.87	1338.7	433400	4.48724
14	33		5.71124	4.71933	0.874884	2337.93	1702.81	325814																										14	24		6.62662	5.60687	0.890842	1693.28	1395.33	281140	2.69956
14	34		8.54602	7.44355	0.910596	2929.49	1808.35	927550	2.55345																									14	26		7.13941	6.00601	0.881986	1625.3	1285.26	179195
14	35		3.60058	2.91463	0.883624	3095.73	1962.13	648758	1.64165																									14	27		5.41889	4.31811	0.809078	1763.37	1451.48	85021
14	36		9.43718	7.77892	0.852966	2283.7	1820.49	994682	4.70513																									14	28		10.9583	9.01609	0.84642	1698.04	1295.6	428501	2.44772
14	37		6.84551	5.78685	0.889931	1845.38	1650.77	99002																										14	29		16.4292	13.8927	0.859348	2240.27	1356.34	1190991	6.15848
14	38		6.66887	5.36219	0.847084	2819.75	2043.67	795718	2.43481																									14	30		16.2705	13.7613	0.851786	2100.6	1288.62	1601941	1.13119
14	39		7.03955	5.69302	0.813561	2420.78	2047.76	305053	2.24165																									14	31		4.30446	3.3784	0.841317	1732.47	1359.1	150844	2.32306
14	40		4.80344	4.01726	0.907785	2121.9	1703.67	257734	0.717593																									14	32		8.25025	6.94277	0.886005	1690.24	1342.99	245167	6.98098
14	42		2.71501	2.17419	0.907397	2001.27	1637.59	122603	1.46723																									14	33		15.789	13.5644	0.885461	1844.31	1328.87	1024295	13.7144
14	44		5.5141	4.52884	0.876621	2208.71	1810.98	450176	4.16053																									14	34		2.35884	1.79161	0.875422	1719.47	1337.71	54662
14	45		6.92667	5.87401	0.898128	2303.67	1881.92	663162	4.71078																									14	35		5.67181	4.7948	0.909206	1671.28	1354.9	199038	4.68837
14	46		2.55065	1.98069	0.882543	2317.19	1761.2	190908	0.986621																									14	36		4.33542	3.48222	0.863032	1420.38	1268.64	37703
14	47		10.4128	8.8908	0.890556	2064.65	1693.58	471533	3.05228																									14	37		7.4299	6.15535	0.861749	1703.45	1306.87	236745	4.36419
14	49		5.37113	4.44247	0.896752	2419.74	1692.89	690548	1.33878																									14	38		15.3075	12.9309	0.849412	1917.94	1311.44	812682	12.6865
14	50		4.33349	3.59018	0.902453	1893.05	1599.35	188366	2.96322																									14	40		6.19294	4.99037	0.844412	1703.15	1314.77	180078
15	3		7.34379	5.97123	0.847243	2401.56	1811.56	687449	1.88581																									14	41		4.60017	3.78066	0.889902	1734.02	1321.1	137620	1.7861
15	5		5.63376	4.62568	0.860236	1919.4	1734.85	107098	3.99836																									14	42		9.06308	7.53836	0.875252	1466.06	1216.88	270674	6.23154
15	13		6.14937	5.00525	0.858552	2187.17	1750.88	442186	1.89188																									14	45		24.2196	20.4946	0.854048	1548.49	1263.06	557188	5.66602
15	18		7.85728	6.5271	0.856816	1740.79	1606.74	68309																										14	46		5.94391	4.92053	0.876144	1627.78	1324.18	167685	2.04945
15	19		7.11886	5.85752	0.851836	2191.34	1915.95	69294	3.81067																									14	47		8.65725	7.21326	0.861589	1792.48	1251.36	419171
15	21		2.82973	2.19299	0.855611	4157.08	2324.51	391531																										14	48		5.13076	4.33788	0.916565	2200.9	1339.45	466338	0.616508
15	31		7.50086	6.30041	0.880594	2316.9	1878.19	546187	3.2552																									14	50		13.9501	11.651	0.847082	1636.37	1200.03	513586
15	32		4.0484	3.29106	0.864993	2134.09	1653.05	293461	2.99205																									14	51		8.87098	7.33034	0.859794	1508.36	1278.66	227478	6.68837
15	39		4.51252	3.62176	0.857075	1957.42	1702.34	119534	2.15127																									14	52		5.77607	4.74582	0.863917	1525.88	1211.88	185062	1.79705
15	40		10.775	9.2638	0.879826	2121.78	1766	432116	9.72299																									14	53		3.5627	2.74378	0.864214	1454.21	1198.25	62704	2.2952
15	41		7.19679	5.80695	0.836107	2438.97	1971.32	452680	3.26467																									14	214		8.94963	7.39078	0.846918	1584.68	1298.48	551866	6.88713
15	43		6.20438	5.1923	0.871679	4916.44	2416.51	2336512	3.76809																									14	215		19.2067	16.0234	0.859793	1842.63	1368.53	801842	2.25629
15	45		5.96292	4.91393	0.866004	2160.42	1905.04	64180	4.89763																									15	8		11.7551	10.1751	0.903724	1734.39	1441.08	347319	2.90312
15	47		4.5742	3.49601	0.8174	2323.56	2004.8	213466	2.66429																									15	11		6.21368	5.32709	0.908636	2143.82	1550.41	497513	0.637415
15	49		8.88179	7.56974	0.876909	2037.44	1793.58	246145	6.57651																									15	14		5.92936	4.93347	0.87369	2178.11	1464.51	312450
15	52		2.97061	2.34738	0.880614	2172.32	1805.33	112713	2.40365																									15	18		4.7235	3.88856	0.89296	1827.24	1438.72	135843
15	56		3.01111	2.27141	0.854255	2162.53	1726.71	224153	1.00329																									15	21		3.98292	3.23961	0.871496	1800.89	1474.77	115692	1.25869
15	59		3.73145	2.96444	0.850341	1833.71	1640.81	66200	1.00608																									15	22		9.14594	7.69084	0.865361	2875.96	1508.89	1584094	4.24999
15	60		5.09666	4.19699	0.874618	1952.3	1773.48	88224	1.32378																									15	23		5.44866	4.54235	0.885491	1787.59	1415.58	248310	2.20397
15	61		10.2444	8.62719	0.854326	1979.2	1730.49	260684	4.52769																									15	26		3.88013	3.11892	0.871964	1968.58	1435.14	161458	2.15674
15	68		5.28743	4.35172	0.872717	2290.09	1888.49	239869	4.22405																									15	27		7.66217	6.38001	0.88036	1961.45	1454.36	368394	0.966407
15	74		6.8947	5.88334	0.893057	3055.82	2097.64	1669069	1.68954																									15	28		5.36419	4.34547	0.868828	1734.23	1407.53	237098	3.08828
15	75		4.2783	3.54276	0.894217	2198.01	1940.38	133736	3.60062																									15	29		3.23473	2.49208	0.87427	1751.61	1388.56	107110	1.20183
15	79		10.2105	8.63811	0.880382	2087.1	1709.78	455643	3.60995																									15	216		13.4042	11.687	0.884707	2098.73	1473.94	662565	5.44599
15	80		6.19439	5.032	0.855169	2147.51	1882.94	280781	4.65257																									15	217		9.27089	7.65175	0.845084	3860.2	1660.74	1971732	1.92979
15	82		4.50422	3.63291	0.88043	2595.06	1891.23	687783	1.48219																									15	218		3.28676	2.5949	0.845001	2637.45	1958.91	35501
15	83		9.73229	8.32585	0.883062	2331.68	1949.37	310866	1.40807																									15	219		3.26473	2.44562	0.811728	1928.32	1634.73	61290	2.24162
15	84		3.61826	2.8738	0.846557	2372.2	2053	100628	1.49803																									15	220		13.2006	11.2287	0.877588	1780.83	1424.61	388779
15	86		4.43708	3.6431	0.874792	2443.29	1934.59	333962	2.73756																									15	221		2.78852	2.17011	0.845	2314.33	1567.18	132447	1.33865
15	87		3.65757	3.01309	0.894667	2208.26	1781.01	179721	3.37442																									15	222		10.2	8.47727	0.855141	1599.52	1396.45	177987	6.14745
15	90		3.87001	3.06947	0.868648	2412.36	1866.3	345507	2.13118																									15	223		12.285	10.4431	0.870528	1573.72	1288.17	268334
15	92		9.09162	7.64393	0.879515	2508.47	1776.65	795442	4.00075																									15	224		4.27945	3.43194	0.845169	1785.82	1455.23	132850	1.01796
15	94		2.87718	2.26093	0.890724	2237.82	1838.46	147749	2.0172																									15	225		12.3732	10.5468	0.869968	1808.95	1452.73	355658	4.44422
15	95		5.25735	4.40102	0.900419	2293.75	1801.05	325627	1.9694																									15	227		5.59878	4.54354	0.851903	1807.91	1414.37	149146
15	96		4.44817	3.59882	0.88761	2290.54	1956.18	192933	3.40347
15	97		9.5086	7.92895	0.862593	2123.23	1726.41	428166	4.41618
15	98		9.04087	7.38451	0.83682	2516.9	2088.99	484445	6.27778
15	99		5.58228	4.63512	0.864477	2087.21	1786.18	165903	3.38073
15	100		10.7729	9.21425	0.888968	2684.12	2046.96	1930511	9.62416
15	101		7.25485	6.01192	0.854417	2065.14	1727.63	258182	6.39462
15	103		2.82773	2.19383	0.876952	1946.45	1734.97	50658	2.18119
15	104		6.44883	5.36267	0.876101	2134.44	1695.29	345881	1.16639
15	105		7.91968	6.67505	0.893282	2065.45	1647.6	517451	1.92094
15	106		3.87462	3.10963	0.877327	2091.28	1732.43	165472	0.332127
15	107		6.08549	4.99935	0.889087	2790.86	1737.93	1012138	4.64655
15	146		4.93337	3.98423	0.845097	2384.62	1940.06	277030	2.71319
15	147		6.44059	5.25889	0.845094	3200.48	2071.39	963927	2.25657
15	148		7.94717	6.53011	0.845056	2506.91	1921.18	838782	3.75196
15	149		8.54286	7.03609	0.845	2546.42	1886.37	647198	6.09532
15	150		3.73844	2.97678	0.845	2863.27	1949.86	447759	1.86891
[truncated: 5 more columns]
