# Supplementary material for: PomX, a ParA/MinD ATPase activating protein, is a triple regulator of cell division in Myxococcus xanthus
Source: eLife. 2021 Mar 18;10:e66160. doi: 10.7554/eLife.66160 (PMC7993993; doi:10.7554/eLife.66160)
Supplement: Figure 4—source data 3. [file elife-66160-fig4-data3.xlsx]

## Sheet: Figure 4-source data 3
Source data for Figure 4C
	SA4712														SA9721												SA8250
	data_set	frame_no	cellid	length	area	width	threshold_spot	background	cell_signal_int	cluster at					frame_no	cellid	ancestors	length	area	width	threshold_spot	background	cell_signal_int	cluster at			data_set	frame_no	cellid	length	area	width	threshold_spot	background	cell_signal_int	cluster at
	1	1	1	5.72771	4.68639	0.862871	783.153	464	203053	2.96723					1	1		8.90333	7.39484	0.858607	8592.65	2504.24	5160021				1	1	2	6.2772	5.23625	0.873187	3542.87	2140	977584
	1	1	2	9.40063	7.87396	0.8586	1108.07	473	648089	5.12554					1	2		37.5455	32.0256	0.85337	11498.3	2351.32	35019089				1	1	3	2.40613	1.86548	0.87639	3287.84	2452	196716
	1	1	3	9.47093	7.95785	0.867993	1361.32	486	873629	5.44723					1	4		21.6926	18.3059	0.860997	10647	2477.17	18589705				1	1	5	12.3986	10.7145	0.892426	4022.79	1587	3683197	8.97792
	1	1	4	7.64714	6.36758	0.86413	1239.88	466	644257	3.94468					1	5		19.2721	16.6614	0.885707	9106.7	2911.38	12514256				1	1	8	5.51056	4.53532	0.876438	3471.02	1577	1188302	3.53171
	1	1	5	9.54189	8.03181	0.864698	850.114	450	446356						1	6		9.19754	7.5737	0.858066	10929.1	2674.48	7344975				1	1	10	13.5462	11.4685	0.859417	3371.53	1459	2773467	8.18195
	1	1	6	4.99733	4.14896	0.890613	1036.55	504	262542						1	7		21.9789	18.7147	0.869159	10226.8	2717.12	17365239				1	1	11	11.7563	9.65674	0.844896	4556.42	1552	4142112	5.70325
	1	1	7	6.59331	5.46397	0.871683	892.797	463	307559	5.14686					1	56		40.7295	34.7993	0.865959	11930.6	2585.79	36238534				1	1	12	9.47538	7.80444	0.864062	3128.48	1531	1684278	3.50043
	1	1	8	8.36544	6.88528	0.841282	1614.51	512	974239	5.21489					1	57		16.1482	13.5673	0.857145	12362.1	2527.6	15862804				1	1	13	13.0524	11.0717	0.868321	4491.75	1507	3849141
	1	1	9	6.5356	5.42551	0.865725	737.022	458	196202						2	1		12.6497	10.7405	0.867824	8769.99	2451.85	7772933				1	1	14	21.5006	17.9104	0.843626	4687.42	1475	8582307	10.7377
	1	1	10	5.12685	4.17284	0.884347	860.026	444	215376	2.70027					2	2		15.7291	13.3592	0.880602	9405.51	2684.71	9988986				1	1	15	4.99752	4.02487	0.869258	2980.75	1500	800565
	1	1	11	7.01719	5.97038	0.89726	1252.22	483	597857	3.44449					2	3		25.7515	21.8546	0.855652	10073.5	2274.24	18740650				1	1	16	10.6262	8.62992	0.837116	4214.48	1485	3119230
	1	1	12	9.23261	7.59674	0.843376	1589.52	482	993869						2	4		3.27808	2.47831	0.816668	8368.29	4173.65	719531				1	1	17	10.1121	8.19273	0.836288	3166.78	1414	2099785	4.63629
	1	1	15	6.78722	5.46933	0.84451	1276.08	508	568678	3.34968					2	5		11.8795	9.95238	0.853874	7651.26	2413.89	6035463				1	1	19	0.391279	0.0535126	0.140573	3697.15	3297	1208
	1	1	16	5.80729	4.74186	0.858958	768.553	465	192439						2	7		18.0395	15.425	0.867699	8749.66	2282.01	10539089				1	1	18	2.38233	1.74825	0.823807	4480.36	2998	393238	1.48801
	1	1	17	5.50273	4.53204	0.881318	1080.31	494	339296	1.90776					2	8		18.9364	16.1217	0.851049	12347.7	2415.71	17930696				1	2	1	7.87066	6.42521	0.841825	2224.75	1413	691759	3.94104
	1	1	18	9.70032	8.38179	0.892476	1212.21	530	655108	4.21696					2	9		71.8895	59.688	0.830966	14692.4	2201.19	89886402				1	2	2	11.9869	10.1824	0.865469	5771.85	1637	5957611	6.33584
	1	1	19	6.21996	5.10554	0.883985	1174.8	515	402715	2.82053					2	10		3.22821	2.48531	0.837949	8077.2	2542.29	1541731				1	2	3	18.1372	14.9898	0.837365	2976.93	1453	3349901	4.67083
	1	1	20	7.59885	6.36026	0.883293	1063.44	494	445873	4.24374					3	3		11.3284	9.4788	0.849739	9592.83	2452.92	6573563				1	2	5	6.41341	5.11245	0.842935	3605.36	1601	1291284
	1	1	21	9.6596	7.99693	0.854091	1182.72	536	626830	4.74323					3	4		34.6174	30.0162	0.874214	14898.1	2462.97	43983512				1	2	6	46.6703	40.34	0.86079	2946.92	1353	8950315	0.45122
	1	1	22	9.01823	7.51254	0.861232	1435.07	480	931835	4.40467					3	6		5.30534	4.17026	0.832977	9391.93	2950.46	2662839				1	2	7	5.52878	4.3838	0.846033	3820.23	1617	1149815	2.10912
	1	1	23	6.97557	5.78868	0.881932	1227.96	481	519807						3	7		18.4007	15.3848	0.836366	12968.3	2650.86	17623140				1	2	8	6.22608	5.04083	0.86508	6489.99	2261	2844799	3.17332
	1	1	24	7.84905	6.59702	0.881142	1100.39	461	546209	2.28174					3	8		37.5181	32.0446	0.865107	14897.2	2430.46	44144307				1	2	9	29.1385	24.8002	0.857719	5787.2	1398	16331147	1.36053
	1	1	25	5.93166	4.84195	0.862476	863.331	496	232731						3	9		23.4754	19.9361	0.857589	11178.8	2380.8	20103131				1	3	1	2.43312	1.8623	0.865562	1461.26	1363	12784
	1	1	26	7.46055	6.17384	0.859283	784.455	488	226473	3.27825					3	10		20.7616	17.639	0.862867	20597.5	2645.22	35429317				1	3	2	14.6008	12.4589	0.863299	2825.18	1461	2249735
	1	1	27	6.13819	5.05139	0.87659	1082.12	459	394311	2.94994					3	11		8.06815	6.777	0.871794	8062.44	2512.14	4143694				1	3	3	26.0485	22.5896	0.884831	4662.74	1534	10031965	9.68041
	1	1	28	7.39023	6.22079	0.880139	1232.58	478	585000	3.38942					3	58		26.0786	21.8792	0.851832	12377.2	2945.65	21278971				1	3	4	9.33983	7.96414	0.89234	3450.5	1616	1683219	6.6023
	1	1	30	9.15227	7.67268	0.875787	1037.99	476	527450						3	59		33.228	28.1377	0.871166	14389.9	2868.88	34601898				1	3	5	33.6121	28.7228	0.862582	3109.35	1540	5763055	29.9681
	1	1	31	6.91255	5.69729	0.855824	1430.59	498	654624	3.28055					3	60		20.3494	17.4636	0.87387	10295.1	2485.6	15010009				1	3	7	7.18837	5.98629	0.870846	3619.22	1797	1145502
	1	1	32	7.75178	6.41621	0.859702	1106.82	467	520120	3.85143					3	61		28.6197	24.4255	0.866413	9871.86	2451.86	20124869				1	3	8	14.5148	12.2738	0.870043	2902.51	1482	2036203
	1	1	33	5.49048	4.56302	0.885042	1232.65	486	439780	2.29706					3	62		12.345	10.2911	0.865078	9440.9	3122.89	9733352				1	4	1	4.41393	3.58128	0.871193	2993.37	1566	688204
	1	1	34	7.40966	6.27609	0.890407	1305.65	500	633918	4.37786					4	1		39.1521	33.7281	0.871944	13122.8	2547.98	41854928				1	4	2	28.6785	24.799	0.863799	4195.41	1529	9824174	7.09299
	1	1	35	6.77706	5.59825	0.86144	876.37	462	296299	3.42537					4	2		21.2942	18.2182	0.868628	11079.6	2624.42	18117974				1	4	4	18.4309	15.2667	0.833847	3766.78	1457	5064118	4.52804
	1	1	37	7.77345	6.38015	0.85892	1199.49	465	607872	3.40823					4	3		20.9209	17.619	0.851625	11458.4	4159.64	12527399				1	4	5	8.60281	6.97343	0.846638	3034.26	1468	1469406	4.88735
	1	1	38	13.7924	11.6916	0.863339	1073.78	466	925748	11.4411					4	4		25.9453	21.889	0.852981	12941.5	3651.11	23267941				1	4	6	16.3653	13.5065	0.830728	3797.18	1416	4410599	9.24934
	1	1	39	9.81883	8.21568	0.861298	970.448	479	546714						4	5		39.2133	33.1941	0.854096	10606.6	2547.42	31798747				1	5	1	17.1453	14.7619	0.871836	3466.81	1526	3968517	8.0084
	1	1	40	6.81654	5.67486	0.876636	1144.5	474	494174	2.94249					4	6		28.532	24.337	0.869284	11822.9	2562.3	26389336				1	5	4	11.8616	9.84349	0.870865	5192.62	1597	4947739	11.3844
	1	1	41	9.41867	7.89644	0.884519	1473.82	485	1025536	4.71745					4	8		14.44	12.0908	0.856534	11828.9	2909.96	11709953				1	5	5	10.1308	8.30555	0.847307	4547.43	1553	3142545	9.71635
	1	1	43	7.92389	6.65138	0.887652	1362.39	508	691368	3.84635					4	9		18.9334	16.1651	0.871444	12484.1	2503.87	18440731				1	5	6	68.5524	57.8831	0.843136	3789.17	1352	18770761	45.8862
	1	1	44	6.59262	5.32428	0.845483	1197.35	466	495270						4	11		18.1731	15.3751	0.861928	11463.4	2411.62	16218950				1	5	7	9.45983	7.94076	0.874029	3773.04	1727	2020925	0.490613
	1	1	45	8.67035	7.18663	0.855791	1196.18	487	619520	4.23098					4	12		16.0476	13.8182	0.88452	8643.91	2282.85	10861686				1	5	10	6.9016	5.60746	0.864782	6220.88	1785	3208665	3.91572
	1	1	46	5.60925	4.5572	0.858008	1098.94	479	356868						4	63		16.0491	13.1164	0.84602	11405.6	4585.37	7300543				1	6	1	8.23673	6.7829	0.855933	1910.69	1268	608744	3.61587
	1	1	47	5.82249	4.57565	0.829549	1260.8	495	420049						4	64		45.8527	39.4634	0.860188	12084.2	2423.9	46139024				1	6	2	11.4222	9.67049	0.870255	2453.22	1444	1295344	5.21561
	1	1	48	6.35278	5.30576	0.885264	1160.96	489	427817						5	2		20.118	17.565	0.887743	10837.2	2601.34	14732922				1	6	3	8.1102	6.8071	0.864096	2714.63	1289	1280868	2.23134
	1	1	49	6.70437	5.65179	0.879293	1012.13	475	399105	3.15213					5	4		16.4951	13.9571	0.865274	11304.8	2447.44	13518301				1	6	4	31.6425	26.9753	0.855931	2805.89	1339	5617010	13.5245
	1	1	50	5.67326	4.56878	0.850099	1114.36	480	366650						5	6		11.8668	10.2551	0.891949	10274.7	2662.18	8163931				1	6	5	15.4229	12.8433	0.845307	3110.57	1357	2958064	9.57976
	1	1	51	6.52195	5.42649	0.87405	1096.33	489	390499						5	7		8.35267	6.84172	0.857235	10434.2	4168.93	7031536				1	6	6	6.20808	5.17928	0.885565	2250.88	1324	638673	3.71328
	1	1	52	8.47488	7.02075	0.855045	1402.31	485	793858	3.99102					5	9		30.0036	25.3989	0.849658	15741.9	3576.76	36092565				1	6	8	16.3947	13.409	0.837759	3369.16	1299	3744851	14.5914
	1	1	53	7.30001	6.08006	0.874269	1205.65	471	566386	2.95232					5	10		18.8793	16.3134	0.879917	9595.61	2500.26	11711445				1	6	9	7.58259	6.16523	0.850953	2383.82	1328	863693	1.71909
	1	1	54	9.98315	8.57216	0.882235	1384.63	512	932952	4.8076					5	11		1.89652	1.41666	0.874335	9770.3	3080.72	771169				1	6	10	12.2698	9.95854	0.830025	2695.46	1324	1911275	6.83448
	1	1	55	7.3354	6.09319	0.867409	1210.3	476	568079	3.70993					5	13		6.22423	5.19735	0.869311	12541.9	2753.5	5195932				1	6	11	13.1128	10.8122	0.84727	3584.97	1454	3153825	3.26408
	1	1	56	7.13309	5.9842	0.880407	1222.19	484	526832						5	15		19.2161	16.4526	0.872337	14711.6	2803.88	19339281				1	6	12	6.46639	5.19111	0.846334	4094.26	1477	1705819	4.6082
	1	1	57	6.13681	5.10815	0.880826	1120.07	478	403926	3.24459					5	16		12.2211	10.1766	0.855017	14709.4	3030.68	12174122				1	6	13	11.6688	9.13896	0.806894	2509.91	1340	1427542
	1	1	58	7.56214	6.34187	0.882514	1021.93	496	412184	3.44927					5	17		16.4342	13.817	0.85182	13002.7	5743.1	9874908				1	6	14	8.19538	6.56726	0.83683	3163.25	1410	1508754	4.97022
	1	1	59	11.8229	9.81532	0.853357	733.715	451	421760	6.36619					5	18		15.2959	12.7828	0.862205	12973.1	2965.1	12616673				1	6	16	14.5287	11.6716	0.829164	3654.72	1426	3589989
	1	1	60	5.56175	4.69702	0.899537	1272.48	480	464372	2.13294					5	20		34.6216	29.7306	0.857421	12218	2353.53	30476977				1	6	17	10.4298	8.66144	0.861821	2286.04	1293	1149420
	1	1	61	8.87873	7.45251	0.881625	1074.36	461	572631	4.56012					5	22		20.0867	16.6045	0.82505	13415.7	4823.8	15374076				1	7	1	12.7613	10.9177	0.8714	3374.59	1416	2957100
	1	1	62	7.19068	5.82346	0.842028	1226.02	473	583377	3.5942					5	27		9.11272	7.48381	0.848281	11122.3	2524.84	6719735				1	7	2	9.67483	8.09498	0.858499	3806.58	1548	2732224	4.7998
	1	1	63	10.2286	8.37839	0.839475	1347.31	473	958044	5.04927					5	28		9.52586	8.18894	0.893518	9453.72	2543.94	6210999				1	7	3	11.1211	9.48209	0.88182	4883.71	1783	3303691	9.43016
	1	1	64	8.13459	6.72649	0.871005	1035.94	463	512636	3.83793					5	65		15.3154	12.8291	0.858944	8021.95	2224.18	7965518				1	7	6	1.52767	0.93462	0.796795	5846.29	3187	257839
	1	1	65	5.54252	4.59495	0.887224	1034.2	479	314642						5	66		23.7088	20.378	0.880907	9468.81	2647	13805170				1	7	7	19.2633	15.7526	0.826901	4278.1	1457	6617299	16.499
	1	1	66	6.2051	5.10552	0.864713	1218.95	475	488400	2.6545					5	67		10.6346	8.99409	0.866395	9146.09	3072.84	5433829				1	7	8	30.4438	25.1177	0.836025	11836.3	1507	38926782	22.901
	1	1	67	4.74375	3.39724	0.732842	1281.21	577	228405						5	68		35.4403	29.952	0.846198	11542.2	3293.58	25621665				1	7	9	6.64912	5.28051	0.851857	4093.83	1677	1676690
	1	1	68	8.16226	6.72719	0.864574	1176.65	461	657013	3.87698					5	69		14.2179	11.7227	0.837469	11022.7	4314.51	10162111				1	7	11	7.85588	6.27328	0.838769	2903.16	1451	1298253
	1	1	70	7.52406	6.2741	0.869678	1237.73	466	637685	3.64448					5	70		21.7266	18.3037	0.865791	13146.7	3196.61	25133799				1	7	12	13.8079	11.0454	0.816158	5325.71	1843	5154163	13.2745
	1	1	71	6.06986	4.93664	0.85284	1400.39	537	587135						6	1		18.4246	15.6757	0.865783	8830.87	2584.49	11326278				1	7	13	18.5502	15.0989	0.834249	2769.71	1408	2833465
	1	1	72	8.39335	7.07365	0.874991	1085.1	481	556686	1.94698					6	3		13.4791	11.3288	0.879094	12552.3	4008.73	9781672				1	7	14	12.8618	10.3678	0.825647	4177.89	1489	3976956	9.97618
	1	1	73	9.24435	7.73423	0.866028	1422.14	471	957799	4.82195					6	4		12.3942	10.1013	0.840886	12343.2	5206.61	7481775				1	7	16	23.2611	19.2854	0.838526	3401.39	1495	5105888	2.90231
	1	1	74	6.49535	5.28932	0.846615	986.033	455	355710	3.04878					6	6		15.8559	13.3742	0.850324	12179.7	6285.39	7525236				1	7	17	14.2789	11.6934	0.841346	4702.01	1513	5053238
	1	1	75	8.15777	6.78331	0.871856	1057.89	465	513840	4.74953					6	14		17.1912	14.4988	0.857965	13291.7	2410.7	16405067				1	7	18	10.4226	8.38219	0.83009	3607.64	1513	2338232
	1	1	76	5.73547	4.78026	0.894774	1057.32	481	334964						6	19		16.8653	14.2357	0.861738	14784	2638.68	18023451				1	7	19	5.09796	4.04889	0.845572	3561.76	1485	1060308
	1	1	77	6.99701	5.83364	0.868527	1044.52	469	422302	3.68568					6	23		17.2117	14.2273	0.841424	12027	3917.96	12182673				1	8	1	12.0047	10.1549	0.871407	3058.36	1491	2287186	5.75221
	1	1	78	9.16127	7.69699	0.860951	1213.47	569	546079						6	24		17.3238	14.7735	0.87464	12922.5	2723.42	14903039				1	8	2	8.37078	6.94329	0.864815	3634.21	1462	1945817	3.87316
	1	1	79	4.73225	3.75584	0.864116	1479.63	516	564210	3.15336					6	25		35.9893	31.1078	0.865871	10481	2390.76	29004346				1	8	3	11.501	9.46308	0.848564	4413.72	1517	3864237	4.24551
	1	1	80	4.85148	3.96376	0.871482	963.589	471	238563	0.852143					6	26		15.5613	13.1663	0.870742	11093	2457.14	12512246				1	8	4	12.9854	10.2609	0.802594	3203.56	1435	2678338	6.33385
	1	1	81	7.44638	6.19155	0.870269	1155.69	463	564857	3.69646					6	28		10.8405	8.88095	0.846909	11280.7	3830.14	7445570				1	8	5	19.6535	15.8644	0.807662	4167.1	1487	6494534	6.80575
	1	1	82	7.05637	5.88178	0.873019	946.436	465	358547						6	29		22.5751	19.2643	0.8587	14186.5	2849.09	22197661				1	8	6	7.50169	6.03044	0.842108	2986.4	1443	1176584
	1	1	83	13.0313	10.8646	0.854956	969.714	436	776814	6.13954					6	30		23.1131	19.5724	0.851702	14216	2685.83	25411632				1	8	7	9.24436	7.48062	0.836278	3571.22	1521	1983161	3.7416
	1	1	84	4.55868	3.76999	0.886205	1017.33	468	255506	2.61596					6	31		28.4197	24.4465	0.871182	11587.8	2237.59	25549278				1	9	1	7.8291	6.57773	0.878196	2959.75	1543	1306634	1.57874
	1	1	85	7.57169	6.33405	0.87491	1057.02	463	499759	3.64314					6	32		15.7176	13.5349	0.878124	11257.9	2412.87	12946296				1	9	3	11.5997	9.80968	0.867633	3877.01	1428	3148617	11.1437
	1	1	86	7.10836	5.89576	0.870512	1178.64	470	535831	3.81914					6	33		12.3756	10.4895	0.870938	10975.2	2378.68	9599129				1	9	4	15.0016	12.3596	0.830139	3896.84	1453	4319870	14.468
	1	1	87	7.97793	6.57245	0.865202	1152.8	481	545676	3.63629					6	34		7.49775	6.3256	0.897085	7774.41	2504.76	3541220				1	9	5	13.237	10.8723	0.831587	4275.92	1418	4302312	6.04009
	1	1	89	14.3451	12.0643	0.857802	1390.04	453	1472309	6.56024					6	71		41.6548	35.1896	0.845525	11891.5	3171.93	31620940				1	9	6	14.434	12.035	0.853498	5094.63	1530	5378086	9.98619
	1	1	90	5.95128	4.89381	0.876374	948.385	481	277007						6	72		16.3084	14.0173	0.87117	10829.8	4033.06	8672527				1	9	7	19.77	16.5184	0.851965	7561.35	1536	14462598	13.0497
	1	1	91	8.28375	6.98949	0.876627	1108.88	496	519692	4.33732					6	73		4.01598	3.14755	0.838483	10229.9	4872.13	1738141				1	9	8	19.2724	15.5725	0.81173	4956.22	1540	7448361	18.7732
	1	1	92	6.94388	5.78421	0.873073	959.405	476	358590	3.46968					6	74		38.477	32.7174	0.853847	11551.2	2762.66	30494568				1	9	9	14.1028	11.6052	0.844012	3134.02	1402	2816311	12.3251
	1	1	93	4.76879	3.88864	0.860541	843.305	466	182581						6	75		23.6589	19.7083	0.847775	11038.3	2863.5	21734568				1	9	10	21.4061	17.592	0.829356	4103.22	1495	6591002
	1	1	94	5.31633	4.38258	0.879464	985.576	481	270628	2.0791					7	1		38.7103	33.5758	0.868488	10264.7	2536.38	29895809				1	9	11	17.0123	11.874	0.714866	4220.15	1545	4329614
	1	1	95	6.49725	5.31666	0.859367	1074.99	468	424066	3.69333					7	2		18.8104	16.2133	0.880809	10771	2586.58	16333289				1	10	4	8.80869	7.30917	0.854392	3332.02	1812	1339746	0.695538
	1	1	96	6.54507	5.43255	0.880418	1101.75	485	427225	2.98046					7	3		17.5118	14.7953	0.862796	11281.3	2824.57	12428997				1	10	5	10.8852	9.24566	0.871607	2616.49	1574	1301324	5.95467
	1	1	97	9.5692	7.95094	0.867467	1450.76	464	996531	4.03198					7	4		14.4741	12.4967	0.875995	9514.44	2566.38	9787284				1	10	6	6.09517	5.04911	0.868038	3722.09	1515	1336473	3.61303
	1	1	98	5.37093	4.40234	0.870769	827.492	466	195562						7	5		19.3001	16.2904	0.858282	14190.2	3874.39	16301169				1	10	7	18.0202	14.9511	0.837158	4383.79	1392	5736720	0.523844
	1	1	99	4.85228	3.91594	0.846717	1004.68	468	257586						7	7		12.9143	10.8469	0.858792	12752.1	2460.52	11470535				1	10	9	8.22895	6.92557	0.883577	3036.83	1545	1379792	5.41502
	1	1	102	6.21733	5.12402	0.873357	814.089	480	203151						7	8		11.1642	9.55773	0.885683	11213.5	2784.37	8391629				1	10	10	11.981	9.6414	0.809455	5303.61	1502	4974028	8.89239
	1	1	103	6.51972	5.33377	0.859124	1173.93	474	476959						7	9		14.2635	12.5557	0.903182	12800.9	2557.75	13815110				1	10	11	6.81168	5.5654	0.856143	2609.37	1446	775162
	1	1	104	5.8744	4.8083	0.870482	1005.36	465	324622	2.86377					7	11		16.9411	14.4513	0.869223	14031.7	2937.15	18323428				1	10	12	7.58603	6.0382	0.830711	2937.26	1427	1114183
	1	1	105	4.1207	3.33519	0.863259	1019.91	473	211087						7	14		25.9866	22.3175	0.877783	11792.9	2405.53	22950436				1	10	13	17.8265	14.9708	0.860002	4267.29	1510	5464080
	1	1	106	8.30458	6.75542	0.85644	1164.76	458	613936	4.2383					7	15		31.6241	26.6589	0.851572	12024.4	2907.87	36344354				1	10	15	5.68432	4.4712	0.824455	2532.6	1391	612948	3.19322
	1	1	107	6.3338	5.25015	0.874553	940.872	453	315004						7	17		10.0326	8.19073	0.838035	10706.6	5711.31	3958217				1	10	16	9.07197	7.23224	0.81671	3871.61	1390	2215227
	1	1	108	6.0083	4.81076	0.843248	1014.88	462	347354						7	19		10.3803	8.7046	0.865473	11323.4	2573.36	8116600				1	10	17	2.89202	2.07887	0.818224	3714.54	1616	614359
	1	1	109	5.59505	4.59251	0.871831	931.229	454	258623						7	20		19.1892	15.8356	0.829172	10284.6	4152.31	8927929				1	10	18	21.0031	17.1119	0.82508	3828.22	1324	5407764
	1	1	110	4.64322	3.69205	0.857435	969.997	567	151721						7	23		8.4816	7.00723	0.863535	9481.66	2369.42	5852574				1	10	19	9.08432	7.36764	0.84036	3021.87	1487	1459654	5.73931
	1	1	111	7.3347	6.21425	0.895746	984.068	455	417952	4.22875					7	76		23.1105	19.4838	0.857101	12792.1	3661.73	18752787				1	10	20	10.1537	8.12394	0.82261	4337.49	1385	3484077	5.68385
	1	1	112	6.9847	5.86098	0.881971	812.831	455	257950						7	77		21.8019	18.5149	0.858285	12302.7	2962.35	17518610				1	10	21	10.8283	8.65632	0.826936	4196.07	1380	3086274
	1	2	1	5.05652	4.05874	0.861715	1168.08	460	353197						7	78		13.5066	11.2667	0.855431	13703.7	3660.34	10904807				1	11	1	12.1877	10.057	0.833431	4789.2	1655	3932562
	1	2	2	7.2511	6.05252	0.881885	1130.6	466	503932	3.16322					7	79		16.5765	13.8766	0.855346	13300.2	3235.35	13401120				1	11	2	9.02677	7.5486	0.877632	3867.44	1591	2085468
	1	2	3	8.80168	7.45909	0.880717	1130.28	462	602441	4.30857					7	80		41.0616	34.7328	0.850511	16019.3	2703.45	49691195				1	11	3	11.316	8.97256	0.813833	4366.32	1519	3842080	7.0664
	1	2	4	17.7804	15.2115	0.880724	1495.76	481	1969663	8.35682					7	81		28.2034	23.9754	0.861376	10538.2	3800.76	16129048				1	11	5	5.48936	4.30568	0.820363	3766.88	1548	1144904
	1	2	5	8.48279	6.84634	0.840551	1272.33	456	710159	3.73176					7	82		13.8259	11.3012	0.842976	10921.4	3714.56	12256904				1	11	6	13.082	10.6785	0.848244	4305.17	1535	4051780	12.7188
	1	2	6	5.94681	5.02205	0.895648	1119.55	478	374531	2.97441					7	83		41.0264	34.7356	0.856165	14278.8	3019.97	41229189				1	11	7	15.8745	12.7362	0.816867	3730.24	1406	3856206	8.01765
	1	2	7	5.56554	4.59096	0.870997	1001.37	465	287552	3.23847					7	84		8.82442	7.19854	0.848254	11544.5	4366.99	4737224				1	11	8	23.1955	18.8716	0.817869	4694.62	1489	8110498	15.7722
	1	2	8	9.00815	7.65574	0.877174	1163.94	464	709329	4.89384					7	85		11.7197	9.52566	0.841349	11155.9	3737.73	11319424				1	11	9	14.4197	12.5734	0.899346	6220.62	1488	7594210	8.15179
	1	2	10	5.75937	4.70525	0.855758	1056.01	462	343525						7	86		18.1057	14.9943	0.841166	9926.92	3174.87	9891833				1	11	10	13.9152	11.3869	0.840836	3338.16	1522	2845550	10.2039
	1	2	12	4.40679	3.71855	0.915725	1121.12	470	291339	2.78222					7	87		21.9088	18.3295	0.845003	11062.2	3072.13	17764578				1	11	11	6.27735	5.13112	0.860871	2557.81	1466	690263
	1	2	13	7.82738	6.54393	0.881936	1092.19	475	483173	5.10003					7	88		24.6733	20.8425	0.852671	11491.1	2923.67	21175635				1	11	12	12.9957	10.6074	0.840531	2548.79	1428	1584575
	1	2	14	5.70698	4.73894	0.887766	1068.32	475	317032						8	2		31.6231	26.4808	0.834162	12170.4	2372.01	28148440				1	11	14	20.5603	17.0778	0.848265	2329.9	1318	2185643	15.9601
	1	2	15	3.78612	3.02541	0.859832	1063.05	837	59874						8	3		5.73431	4.62648	0.835254	11323.7	2607.41	4149550				1	11	15	4.26299	3.22355	0.827048	2938.44	1627	566040
	1	2	16	6.80262	5.66173	0.873546	1061.79	474	447047	3.18197					8	4		14.2574	12.2972	0.883213	9517.37	2832.03	8834715				1	11	16	20.6768	17.0357	0.841996	4253.08	1414	6625639	17.0572
	1	2	17	9.29806	7.93337	0.892061	1193.23	488	674347	4.15415					8	5		30.0632	25.3869	0.846413	9102.95	2276.12	21076917				1	12	2	12.4455	10.6058	0.86919	4326.77	1714	4295376	5.07305
	1	2	18	3.92991	3.17191	0.867859	1410.01	502	358372						8	6		25.3892	21.9098	0.870016	11483.5	2300.68	23577113				1	12	3	13.2564	11.4688	0.886501	3536.72	1522	3172077	11.6388
	1	2	19	6.72734	5.69398	0.877852	944.936	467	346665	3.79163					8	7		22.2142	19.0641	0.864903	8711.85	2173.2	16044581				1	12	4	10.7621	8.99288	0.862014	3470.65	1523	2393872	4.25433
	1	2	21	6.47228	5.44999	0.889392	1142.62	479	433683	2.91713					8	89		11.8312	9.90046	0.86519	10206.8	2779.61	6974057				1	12	5	14.3906	11.5507	0.814164	5197.59	1659	5648174	9.03442
	1	2	22	7.47349	6.22323	0.871219	1189.95	465	580955	4.16811					8	90		14.7402	12.612	0.869383	10395.1	2651.61	10861216				1	12	7	7.4374	5.97277	0.846139	2902.51	1579	990674	2.71412
	1	2	25	6.74034	5.66666	0.874774	1043.32	464	422377	3.80388					9	1		9.16226	7.75845	0.883421	5084.85	2116.45	2524159				1	12	8	12.9019	10.9766	0.875931	2662.4	1398	1891081
	1	2	26	7.34352	6.0661	0.867698	1079.67	459	465629	3.38181					9	2		24.0967	20.5808	0.860045	8934.03	2195.09	15522045				1	12	9	15.7026	12.487	0.804599	4893.29	1605	5854545	4.13989
	1	2	28	8.75103	7.27973	0.855777	1154.04	468	642142	5.00558					9	3		14.5416	12.4643	0.888245	6514.59	2189.46	5663403				1	12	23	16.9473	13.5244	0.814532	5786.15	1663	6966428	6.81107
	1	2	29	6.23089	5.17586	0.865642	1032.06	478	375604						9	5		46.5164	40.4384	0.869561	10684.4	2279.73	38433163				1	12	22	0.310709	0.0410047	0.161682	6356.79	3318	9770
	1	2	30	6.0045	4.94963	0.878925	1125.67	474	406491	2.39137					9	6		16.0102	13.5712	0.861903	11775.4	2857.24	12685932				1	13	1	9.79552	8.33845	0.880662	3261.38	1595	1833442	2.20478
	1	2	32	6.6907	5.47841	0.859791	1041.7	463	400270	3.64842					9	7		16.0011	13.3682	0.843874	9253.41	2379.06	10097338				1	13	2	8.64828	7.20337	0.861892	3265.71	1614	1756896	2.80667
	1	2	33	4.34882	3.34396	0.816537	1198.64	618	208869	3.51741					9	8		22.9788	19.618	0.873503	11201.1	2258.79	20323080				1	13	3	12.2518	9.58745	0.798504	4491.56	1794	3138113
	1	2	35	10.2674	8.69762	0.874854	1306.46	468	941947	5.38372					9	9		13.1575	11.228	0.875731	11094.4	2754.42	10226736				1	13	4	8.34021	7.06852	0.878512	4654.72	1700	2795896	7.87879
	1	2	37	8.14871	6.77703	0.878335	1191.85	456	652789	4.06348					9	10		41.9075	36.1287	0.870588	11021	2186.33	39914051				1	13	5	11.1369	8.99208	0.83228	4307.82	1557	3454371	6.63966
	1	2	38	5.55059	4.45607	0.858608	1156.53	468	387737	2.65132					10	1		12.7716	10.9905	0.890913	11162.6	2399.63	10586076				1	13	6	12.9758	10.769	0.856126	2978.69	1546	2005325	0.380077
	1	2	39	9.43313	7.9144	0.86235	1101.82	451	683783	4.32048					10	2		8.76982	7.39491	0.870854	6621.59	2070.36	3735300				1	13	7	8.84372	7.42589	0.877878	3107.02	1579	1588274	1.78267
	1	2	40	5.99042	5.02492	0.880272	990.255	464	338230	2.98763					10	3		5.61234	4.49041	0.843488	11051.5	4419.73	2392129				1	13	8	9.66199	7.73992	0.807814	5520.61	1637	4161863	5.15768
	1	2	41	8.23231	6.73226	0.845275	1491.14	474	905971	4.708					10	5		13.0907	11.0516	0.870972	13110.8	2510.54	13511579				1	13	9	15.3411	12.4754	0.833954	4468.47	1571	4994857	0.506563
	1	2	42	5.30046	4.40912	0.886225	917.293	495	219821						10	7		15.8468	12.7889	0.812201	21587.6	3380.45	25395366				1	13	10	7.77007	6.19322	0.825894	3647.91	1606	1768119	4.24927
	1	2	43	6.37888	5.34477	0.883728	1128.24	500	406002	2.45314					10	8		12.0935	10.2912	0.87482	11139.5	2489.61	9319632				1	13	11	8.07678	6.32777	0.804672	3648.28	1578	1849144	3.90135
	1	2	45	6.04122	4.91336	0.861768	940.799	459	287139						10	9		23.6254	19.9413	0.844772	9015.75	2135.43	16177694				1	13	12	12.5663	10.2831	0.83561	3515.72	1455	3059354	10.2066
	1	2	46	5.54789	4.4492	0.857265	1502.22	493	602017						10	10		26.2519	22.4996	0.863105	10943.8	2200.68	24063543				1	13	13	14.0569	11.3944	0.83009	2656.32	1397	2004482	3.85989
	1	2	47	8.05473	6.86227	0.887948	1219.87	486	643540	4.06171					10	91		9.39165	7.86231	0.881755	13662.5	2942.35	9359638				1	13	14	8.44173	6.91818	0.852277	3809.14	1418	2169329
	1	2	48	7.44855	6.12412	0.861317	1609.52	484	885154	3.74624					10	92		41.0744	35.0789	0.8509	10172.8	2672.35	29621416				1	13	15	9.28639	7.34223	0.818695	4744.66	1582	3227195
	1	2	49	9.12145	7.6016	0.848633	998.084	446	555731	4.77216					11	1		2.23057	1.64047	0.855466	5202.36	2296.91	443227				1	14	1	7.04446	5.78531	0.870748	2772.02	1581	906770
	1	2	50	8.53004	7.06586	0.862261	1034.1	440	560078	3.94422					11	3		5.82967	4.84594	0.873734	6026.38	2215.27	1741260				1	14	2	25.9745	22.2859	0.867838	3394.92	1430	6808266	21.1061
	1	2	51	9.07594	7.41716	0.840094	1177.38	463	672385	4.47862					11	4		20.0426	17.1063	0.870801	8479.23	2053.71	12337086				1	14	3	8.61984	7.20495	0.858482	2816.04	1492	1278850
	1	2	52	6.61032	5.38809	0.864725	1273.95	484	517077						11	5		15.524	13.3234	0.875293	11193.6	2210.16	14724061				1	14	4	6.51817	5.36436	0.871753	2757.54	1520	898615	1.53627
	1	2	53	8.54863	7.03075	0.857839	1102.94	442	612148	4.49385					11	6		8.2979	6.97941	0.88716	10509	2323.6	6301113				1	14	5	2.5794	1.87462	0.812246	4487.7	1909	618876
	1	2	54	7.95775	6.58138	0.856569	1166.55	457	599744	3.83809					11	93		25.3348	21.2603	0.847376	10770.6	2118.96	20092599				1	14	6	8.10177	6.66235	0.863214	3101.43	1520	1378826	1.85386
	1	2	55	6.02241	4.90077	0.865093	950.836	450	311826						11	94		39.5517	33.8717	0.877102	6903.97	2080.67	20710231				1	14	8	27.7311	22.5315	0.8269	4936.07	1494	11383307	21.103
	1	2	56	5.94981	4.90363	0.883034	1007.24	470	316942						12	1		12.9552	11.1118	0.878308	11020.5	2538.72	9535044				1	14	10	12.337	9.87633	0.820029	3679.22	1535	2876529
	1	2	57	7.78362	6.46078	0.881323	1131.4	459	585428	3.86561					12	2		8.53692	6.98233	0.859515	12256.3	3270.71	5793318				1	14	11	11.2091	9.158	0.838438	4092.26	1614	3125327	5.08788
	1	2	58	4.92663	4.03404	0.880488	1067.97	483	290000	1.69008					12	3		9.31618	7.84804	0.869446	11704.1	2656.15	7362650				1	14	12	12.3371	10.1308	0.844339	5651.43	1520	5409479	4.18403
	1	2	59	6.16089	5.05341	0.865965	1146.5	472	422308	2.98002					12	4		19.2618	16.1204	0.838519	13194.2	3441.97	16866894				1	14	13	8.51023	6.60174	0.807404	3063.17	1451	1502319	3.55024
	1	2	60	5.7396	4.65269	0.866873	1221.81	491	406199						12	5		20.8385	17.0806	0.823539	11150.6	3771.62	15234403				1	14	14	19.9668	16.4502	0.828781	3951.5	1374	6159398
	1	2	61	8.80042	7.31061	0.872647	994.187	442	537901	3.73562					12	6		21.8378	18.2827	0.851037	9853.63	3270.4	12488290				1	14	16	5.3062	4.19279	0.836345	3675.53	1552	1215353
	1	2	63	7.0605	5.94358	0.885232	869.792	456	298494	4.13771					12	7		24.6665	20.92	0.862127	14272.2	2772.46	25096666				1	14	17	7.54318	6.1222	0.851618	5416.44	1737	2745077
	1	2	64	5.94176	4.93528	0.877443	927.61	468	272666						12	8		17.5078	14.8555	0.878329	9998.51	2465.38	11613570				1	14	25	9.39188	7.44272	0.827076	5960.18	2464	4752596	8.9666
	1	2	65	7.38275	5.9982	0.848606	1102.23	447	543901						12	12		13.0378	10.7795	0.842505	12477.6	2926.51	11342666				1	14	24	9.61128	7.67605	0.837365	5986.21	1663	4401206	0.57305
	1	2	66	6.22245	5.07134	0.85327	1007.04	454	337391						12	14		24.7918	21.2932	0.860584	13545.3	2763.88	26791635				1	15	1	4.82261	3.91471	0.851794	1964.52	1554	220134
	1	2	67	6.14267	5.11603	0.882284	1041.04	478	342793	4.01178					12	15		25.8361	22.5459	0.880373	13920.5	3264.01	25673483				1	15	2	7.32446	6.10793	0.865442	2244.85	1492	622557	3.13332
	1	2	68	7.80909	6.42088	0.859857	1163.27	475	561440	3.58289					12	16		10.1016	8.56892	0.883445	12308.1	2752.33	8781165				1	15	3	10.279	8.59505	0.858934	3331.39	1535	2178572	4.0783
	1	2	69	6.71819	5.47779	0.852274	1115.89	449	468399	3.10441					12	17		28.5924	24.9544	0.887921	8028.56	2557.03	16254729				1	15	4	3.16932	2.49973	0.873212	2709.77	1511	427822
	1	2	70	7.68068	6.44559	0.883078	1154.62	475	559261	4.35708					12	18		10.6389	8.90041	0.866936	10768.2	2665.59	8102715				1	15	6	6.45212	5.22381	0.838822	2748.88	1978	334171
	1	2	71	5.41321	4.36521	0.850218	1057	457	322786	2.31023					12	95		15.4913	13.0343	0.859443	13047	4553.1	12714626				1	15	7	8.03585	6.74623	0.874216	4675.85	1789	2678168	3.85438
	1	2	72	6.72999	5.52662	0.861304	1082.64	452	458222	2.62149					12	96		5.55264	4.45591	0.843623	11919.2	4246.85	3046886				1	15	8	17.9214	15.2564	0.864757	3875.25	1510	4632215	3.35794
	1	2	73	7.5973	6.26951	0.854391	1068.06	451	493866	3.26913					12	97		36.5517	30.307	0.834998	13055.7	3031.54	32522915				1	15	9	5.89117	4.77927	0.843671	6463.67	2084	3265267	0.403536
	1	2	74	6.2631	5.29028	0.882813	914.571	450	311727	3.32883					12	98		25.6645	21.4626	0.849438	13327.8	3279.72	28691083				1	15	11	5.839	4.68942	0.850885	3317.88	1596	1098807	1.20022
	1	2	75	6.07583	5.04728	0.877374	1450.02	452	655122	3.98797					12	99		9.48265	7.57473	0.808533	13325.8	4721.59	8245527				1	15	12	3.2061	2.46682	0.839509	4691.66	1984	883065
	1	2	76	7.682	6.35335	0.862534	1061.72	447	497501	4.20443					13	1		34.6202	30.425	0.883236	13448.8	3794.07	31015808				1	15	13	59.0135	48.2635	0.809751	6153.12	1465	33965587	6.05385
	1	2	77	7.05047	5.78879	0.858636	888.617	437	334834	3.61136					13	2		27.207	23.3202	0.86553	14272.2	3631.49	26928590				1	15	14	13.2411	10.9969	0.849996	3735.57	1637	3049113
	1	2	78	6.12691	5.01646	0.850319	1061.08	463	378180	3.54514					13	3		21.8167	18.7455	0.866491	12184.9	3667.59	19155525				1	15	15	8.60293	6.98861	0.836731	4575.6	1844	2618648	0.327601
	1	2	79	7.96116	6.71827	0.878586	1074.03	449	546799	4.21736					13	4		6.99966	5.95986	0.904832	15960.6	4754.21	5817655				1	15	16	10.8735	8.67529	0.816275	4997.96	1738	4079957	1.78668
	1	2	80	9.91779	8.18523	0.838816	1281.21	456	855856	4.40633					13	5		28.9442	24.5368	0.842916	14499.6	3582.41	29538647				1	15	17	9.06026	7.13898	0.815615	4550.59	2011	2251648
	1	2	81	9.07755	7.68604	0.884639	1215.8	466	737916	4.33089					13	6		14.9197	12.8303	0.885436	12632.1	3850.94	13761548				1	15	18	7.15829	5.7997	0.844029	2997.08	1597	1084464
	1	2	82	11.3858	9.64185	0.857765	1098.06	447	795674	3.31783					13	7		11.1774	9.34394	0.853558	13286.7	3772	10622970				1	15	19	14.5124	11.4928	0.801341	4048.6	1621	3771419	6.2473
	1	2	83	9.91769	8.22835	0.867789	1176.03	516	736337	4.09406					13	100		41.8375	36.114	0.870719	15937.5	3765.57	46054011				1	15	20	9.97759	8.28381	0.853439	4606.56	1792	3216808	5.36469
	1	2	84	7.4373	6.21101	0.88205	1094.57	478	472453	4.0118					13	101		15.2995	13.046	0.870893	11972.6	3797.05	11759328				1	15	21	10.2103	8.37805	0.848632	2812.82	1729	1222413	6.85448
	1	2	85	4.78636	3.87686	0.8707	909.479	452	211209						14	1		20.32	16.9836	0.848514	14140.7	4336.16	15663549				1	15	22	10.7766	8.98612	0.860349	4411.22	1893	2893232	6.62727
	1	2	86	9.21575	7.67584	0.861682	1082.81	443	626397	4.65981					14	2		12.5895	10.6841	0.855503	9583.25	3866.54	6826795				1	15	23	10.6714	8.61357	0.832127	3139.86	1548	1890679	6.16048
	1	2	87	6.52444	5.48314	0.888302	862.047	446	286838	2.87292					14	3		18.3563	15.7162	0.873376	10468.6	3607.02	10271387				1	15	24	6.27674	4.96998	0.825094	3880.59	1703	1529869
	1	2	90	7.44108	6.26337	0.879204	1104.38	439	534033	3.42673					14	4		40.9706	34.6161	0.851937	12760	4345.47	28863616				1	15	25	4.35469	3.42515	0.8503	3544.79	1591	931094	0.607682
	1	2	91	8.56746	7.22635	0.879079	962.794	425	515801	4.31729					14	5		34.4188	29.2316	0.863692	14564.7	4464.63	44767756				1	15	26	7.58074	5.90431	0.811136	3131.41	1606	1260102	3.68887
	1	2	93	6.54849	5.46473	0.886007	979.285	454	359092	2.98107					14	6		13.7293	11.7366	0.873305	13860.1	3840.83	11843029				1	15	28	4.35129	3.19848	0.808268	5843.49	3276	835146
	1	2	94	7.51297	6.23036	0.862382	952.474	441	396894	4.21264					14	7		20.2105	17.2023	0.853491	13456.6	3789.61	16911722				1	15	30	2.23706	1.58919	0.814098	3001.97	1786	244606
	1	2	95	7.31503	6.04686	0.883532	1114.17	450	508479						14	8		21.4216	18.4332	0.868113	15134.1	3771.88	21193597				1	15	31	20.4599	16.8278	0.831499	5586.96	1690	9054352	17.7839
	1	2	96	6.45864	5.31471	0.872805	1047.54	442	407388	3.32616					14	9		3.53662	2.62841	0.801948	10253.4	4519.99	1272613				1	15	32	10.2882	8.55146	0.855734	3827.98	1611	2481594	3.338
	1	2	97	5.68182	4.46394	0.831968	1112.72	780	80540						14	11		11.8995	9.94533	0.878952	11314.7	3829.11	7093881				1	15	33	14.01	11.3465	0.818149	4176.82	1544	4254622	2.55761
	1	2	98	7.48487	6.21499	0.87969	898.964	463	322985	3.75181					14	13		11.6687	9.74147	0.861821	15069.3	4616.82	10301108				1	15	34	9.69413	7.77051	0.834719	3463.56	1501	2235520
	1	3	1	5.48196	4.48938	0.871752	1072.35	455	351832	2.75251					14	16		19.5315	16.7535	0.862065	14989.2	3776.21	20864865				1	15	35	4.97649	3.92083	0.846485	3776.32	1629	1027133
	1	3	2	6.41776	5.39433	0.878933	1091.55	484	398666	2.84092					14	17		23.329	19.7202	0.858581	12619	3665.23	20159080				1	15	36	11.0533	9.07367	0.845001	6501.16	1842	5494779	5.30214
	1	3	3	7.14863	5.87948	0.855639	852.433	442	301546	4.22677					14	18		12.2662	10.3509	0.870634	11338.4	3270.68	8498438				1	15	37	7.17184	5.67605	0.825949	4233.01	1559	1970132
	1	3	4	6.48714	5.46222	0.88188	1157.05	491	440263	3.20302					14	19		16.2759	13.5884	0.859385	16591.7	4008.76	17922939				1	15	38	9.21737	7.37302	0.83487	3919.76	1456	2658990
	1	3	5	9.48906	7.98125	0.873113	1047.46	460	610780	4.35451					14	20		27.4263	23.9006	0.875016	11995.5	3166.11	26230105				1	15	40	14.4006	12.0074	0.84598	3032.51	1588	2895551	8.29653
	1	3	6	6.79032	5.71886	0.880018	1228.94	483	511508						14	22		6.50697	5.45221	0.875544	7910.95	3901.68	2113703				1	15	39	29.6513	24.829	0.846936	4235.8	1471	11345074	6.949
	1	3	7	11.3606	9.54828	0.865219	1129.73	459	805947	6.35954					14	102		1.69	1.24101	0.84354	8668.76	3944.63	505437				1	16	1	11.1228	9.42594	0.862241	3142.61	1541	2087162
	1	3	8	5.47764	4.53835	0.878377	1045.07	502	280527	2.43734					14	103		26.594	22.4273	0.84318	13057.3	3584.24	23138786				1	16	2	4.40417	3.60311	0.886638	2475.26	1537	429710
	1	3	9	5.41899	4.32841	0.850669	1393.95	545	450774	1.23963					14	104		1.33079	0.884412	0.818666	10023.7	7046.54	200261				1	16	3	12.9606	11.0802	0.861465	2795.91	1484	1997401
	1	3	11	5.85738	4.82129	0.876353	1187.96	491	376301						15	1		18.952	16.4092	0.880764	14729.1	3035.79	20964470				1	16	5	12.4542	10.2724	0.844329	2916.73	1535	1883314
	1	3	12	5.71091	4.73761	0.881063	1105.67	484	343583						15	2		14.424	12.3873	0.888225	11497.6	3050.34	11674908				1	16	6	28.1709	23.9692	0.856557	4271.96	1525	10043354	9.67302
	1	3	13	9.91167	8.27254	0.861655	1083.05	471	645300	4.04007					15	3		9.20084	7.642	0.859328	15064.1	3036.47	9775282				1	16	7	10.1291	8.37958	0.855439	3436	1603	2061786	6.61346
	1	3	14	7.89448	6.51671	0.851864	1326.43	479	708878	3.99202					15	5		11.2323	9.69621	0.894129	11273.4	3388.62	7694644				1	16	8	5.9979	4.74676	0.832205	3709.04	1636	1319679	5.71121
	1	3	15	8.05519	6.76218	0.880446	1137.66	471	571689	4.17381					15	6		19.1725	16.1865	0.864398	10019.5	2945.9	13104241				1	16	9	4.24162	3.20538	0.808761	6223.51	2141	1538161
	1	3	16	9.08498	7.66644	0.880085	1078.25	473	596534	4.32103					15	7		18.0555	15.2294	0.860932	15771.7	3582.56	23380252				1	16	10	23.8447	20.5314	0.872206	2517.8	1573	2527166	4.82651
	1	3	17	6.66513	5.62276	0.87912	869.991	490	253471						15	8		22.1964	18.8444	0.870205	16241.3	3354.59	27436223				1	16	11	11.6183	8.01911	0.719337	5145.19	1768	3663929	6.27571
	1	3	18	8.29325	6.99615	0.875731	1155.53	469	655425	3.83271					15	9		8.62517	7.1816	0.864603	9645.52	3259.44	5094249				1	16	12	6.35611	5.04468	0.821934	2652.82	1547	718246	3.52326
	1	3	19	7.87708	6.62347	0.871951	884.312	460	356616	4.2409					15	10		10.7002	8.99778	0.863528	11621.4	3007.1	9868866				1	16	13	11.7794	8.96978	0.781856	4982.07	1779	3633198
	1	3	20	8.2539	6.95303	0.870439	1353.68	462	807287	3.90946					15	13		18.3839	15.7809	0.876907	10940	3208.71	13801191				1	16	14	12.3541	10.0013	0.833453	5087.26	1650	4484009	6.8596
	1	3	21	5.97228	4.9344	0.866038	976.178	474	331385	3.31899					15	105		12.6248	10.6376	0.871453	11089	3592.65	8012397				1	16	15	7.92109	6.46077	0.837709	6086.31	1768	4008583	0.422303
	1	3	22	8.36364	7.02467	0.870775	1131.86	470	599616	2.0906					15	106		29.9195	25.1647	0.851205	12605.2	2987.66	28372429				1	16	16	12.2376	10.2543	0.8744	2624.25	1480	1594531
	1	3	23	6.77234	5.61262	0.875839	1023.69	468	397297	3.5148					15	107		17.0567	14.3692	0.862824	12366.2	3435.81	14402270				1	17	1	17.5667	15.1386	0.880467	3106	1511	3580247	10.8126
	1	3	24	7.6983	6.29851	0.847251	1318.38	497	618263	4.22186					15	108		22.8559	19.1346	0.854789	13310.1	3344.82	22362200				1	17	2	10.1133	8.53325	0.863273	4647.02	1899	3171354
	1	3	25	6.06991	4.82318	0.846505	1268.27	474	478751						15	109		8.00991	6.6378	0.865006	8627.15	3405.85	3533557				1	17	3	6.06213	4.90255	0.8632	2091.21	1514	385534	2.42981
	1	3	26	8.4396	6.97796	0.852059	1215.53	467	666319	4.01957					15	110		15.5286	13.107	0.864775	9175.22	3234.66	9461996				1	17	5	10.4958	8.8745	0.876856	3925.58	1612	2840373	6.50693
	1	3	27	6.54905	5.47052	0.874693	1164.36	478	470046	2.79428					16	1		9.31846	7.8364	0.870368	11875.9	3620.33	7356552				1	17	6	5.2854	4.30826	0.851544	2853.4	1614	741099	2.9397
	1	3	28	9.40684	7.8597	0.865858	1370.78	473	994143	4.83773					16	2		23.1486	19.6181	0.857639	12707.5	3863.9	18531129				1	17	8	8.37315	6.87058	0.853185	4174.08	1737	2291780	4.33253
	1	3	29	5.97138	4.90578	0.863778	1582.72	499	680877	2.56772					16	4		8.65685	7.36625	0.892275	14197.8	4167.61	8296099				1	17	9	21.6126	17.8716	0.83555	3665.2	1577	5186213	19.8466
	1	3	30	5.37705	4.33541	0.856803	1163.17	476	376035	2.3146					16	5		9.98004	8.29897	0.860347	14432.7	3744.62	10296722				1	17	10	11.0238	9.15684	0.856358	3545.95	1678	2312648	5.94551
	1	3	31	9.288	7.79241	0.863905	1094.01	460	662934	5.14768					16	6		31.2114	26.337	0.852573	13796.9	3480.52	32205409				1	17	11	6.29408	5.04838	0.856439	3011.42	1507	976426	5.02276
	1	3	32	6.72403	5.50739	0.856696	1142.96	482	471793	3.15054					16	7		19.2082	16.3825	0.870874	13498.8	3541.32	18620432				1	17	12	16.8828	13.5506	0.824357	3887.55	1567	4441366	10.5381
	1	3	33	4.29696	3.44904	0.864134	1088	475	249711						16	8		26.5615	22.9448	0.872589	9660.93	2992.27	17894593				1	17	14	7.23753	5.82377	0.842601	4777.85	1638	2600695
	1	3	34	7.7815	6.4025	0.8525	1365.69	482	736890	2.99319					16	9		21.8026	18.6555	0.856419	13940.3	3401	23987617				1	17	15	13.944	11.4647	0.844115	3321.66	1453	2929893	3.42965
	1	3	35	6.66739	5.31804	0.842433	1232.1	491	512967						16	11		31.5657	26.99	0.859459	13898	3415.25	32778081				1	18	1	6.91947	5.69535	0.865446	4479.58	1693	2306496	2.66765
	1	3	36	32.9749	28.3638	0.87525	2275.27	475	6734887	7.32177					16	111		11.4497	9.41008	0.852762	13174.2	4765.43	10960664				1	18	2	28.82	23.5901	0.828885	4282	1579	9058057	2.91292
	1	3	38	6.72967	5.54032	0.854867	1147.53	469	480587	3.83802					17	1		13.2059	11.3303	0.879436	9462.35	3160.49	7650635				1	18	3	7.189	5.65922	0.811108	4276.14	1702	1985643
	1	3	39	8.14023	6.76693	0.86777	1162.98	477	635897	4.11127					17	2		10.0387	8.34917	0.873388	12938.4	3832.71	7772927				1	18	4	9.95995	7.96306	0.824318	4074.81	1617	2539253	9.71438
	1	3	40	6.8105	5.64741	0.8819	1150.79	482	475192	3.29085					17	4		26.1062	21.7437	0.844675	15530.9	3153.85	31974492				1	18	5	6.02376	4.9344	0.868522	4163.89	1859	1442327	2.24884
	1	3	41	6.9086	5.75395	0.877346	1058.9	474	424566	3.08397					17	5		10.2476	8.45678	0.851262	11038.7	3538.28	7000548				1	18	6	10.5072	8.62417	0.852492	3881.05	1626	2720968	7.93653
	1	3	42	5.28523	4.1904	0.857025	1102.88	478	324700						17	6		19.9632	17.0261	0.864479	15323.9	3162.1	22866334				1	18	7	11.2171	9.01499	0.825919	3110.21	1567	1892406	2.09787
	1	3	44	5.45588	4.52326	0.879574	1021.68	490	291219						17	7		27.7908	23.8137	0.857702	9466.91	3154.63	17597617				1	19	1	8.66278	7.23655	0.860478	2520.3	1488	1071549	4.78424
	1	3	45	7.59765	6.37558	0.884733	1121.08	479	526712	4.11912					17	8		12.838	10.8958	0.87951	13000.2	3589.56	11777126				1	19	3	5.63153	4.57485	0.865797	2766.74	1560	714980
	1	3	46	8.12586	6.72465	0.862328	1170.65	468	615108	4.14699					17	12		19.5235	16.7043	0.871465	15826.5	3674.3	24063844				1	19	5	12.4141	10.5266	0.861775	4980.01	1650	4387545	2.68593
	1	3	47	4.66011	3.75439	0.86214	953.295	474	214982						17	112		27.0123	22.68	0.843281	14386.4	4106.63	26422506				1	19	6	14.484	12.4947	0.88104	4333.44	1632	4598927	14.1056
	1	3	48	5.94354	4.88296	0.86652	1182.91	490	410214						18	1		23.2643	19.9427	0.851917	13827.9	2952.76	23679637				1	19	8	8.5964	7.04419	0.855347	3039.12	1555	1454363	5.56945
	1	3	50	5.96172	4.96717	0.888136	866.745	476	231453						18	2		17.6455	15.1301	0.872316	8922.83	2234.52	11552535				1	19	9	5.82933	4.54181	0.795589	5135.58	2062	1711726
	1	3	51	7.9032	6.47279	0.847978	1153.35	462	587990	2.97415					18	3		15.1864	12.8073	0.857557	11952.6	2471.88	13975167				1	19	10	21.5297	18.0158	0.859093	4009.01	1559	6454253	19.9136
	1	3	53	9.168	7.68876	0.881997	1243.1	522	639376	3.91096					18	4		34.4871	29.6955	0.873982	14231.7	2904.33	33708924				1	19	12	7.63826	6.35242	0.881413	3985.11	1804	1575060
	1	3	54	5.63598	4.57721	0.852192	922.997	464	270969						18	7		10.5693	8.34786	0.816531	11962.7	4560.97	6844056				1	19	13	16.6905	13.1528	0.800162	1888.19	1483	872372	15.5941
	1	3	55	6.51722	5.50426	0.886966	1055.58	494	382338	3.15181					18	10		11.142	9.14594	0.840708	13177.4	3314.18	10083205				1	19	14	6.55559	5.07148	0.813164	4970.04	1854	1987905	5.43351
	1	3	56	9.47348	7.74911	0.843716	1398.69	468	952726	4.8143					18	11		9.82774	8.46827	0.897184	13779.3	3138.87	10406488				1	19	16	22.5708	19.3612	0.876431	3848.56	1508	6235260	3.48315
	1	3	57	5.89961	5.01628	0.908166	1116.97	482	397058	2.35811					18	12		12.9037	11.1418	0.894945	12442.9	2518.95	12299561				1	19	17	6.47444	5.3302	0.872069	5954.47	1741	2873552	3.17252
	1	3	59	9.37116	7.6096	0.836778	1129.16	476	623812	4.45836					18	13		18.8274	15.9514	0.862664	10772.5	2229.2	14456965				1	19	18	21.6347	17.4453	0.812491	5087.52	1483	8824797	21.1776
	1	3	60	8.21743	6.80956	0.864875	1437.64	473	833437	4.41593					18	14		19.8835	16.8741	0.857452	12167.2	2567.78	19367639				1	19	19	9.78926	7.93874	0.835997	3638.18	1485	2171520	2.06363
	1	3	61	9.49804	7.91632	0.878156	1229.2	526	675973	4.62877					18	15		15.1292	12.8464	0.862253	9329.17	2179.82	11215564				1	19	20	20.5271	16.8836	0.830934	4605.73	1499	7056053
	1	3	62	6.93437	5.71532	0.858594	1073.29	480	429281	3.9103					18	113		15.735	13.3116	0.856025	11041.9	2863.56	11579131				1	19	42	2.34936	1.75893	0.871111	3220.87	2018	295810	0.776813
	1	3	63	11.1753	9.42735	0.861775	1035.77	493	669586	3.35294					18	114		20.9034	17.5804	0.848793	15733.4	2799.85	27172665				1	19	41	6.07959	5.00449	0.865333	3332.49	1833	975058
	1	3	64	6.83795	5.1926	0.804368	1314.05	504	432616						18	115		34.5849	29.17	0.858677	10922.3	2345.66	27213291				1	19	43	7.7469	6.29002	0.840848	4129.25	1874	1730726	7.46707
	1	3	65	6.07717	4.84283	0.836606	1120	525	339675						18	116		23.2895	19.5731	0.854028	14304.7	2644.97	25618956				1	19	46	1.3274	0.958634	0.828995	5944.58	3799	105774
	1	3	66	7.23742	5.93461	0.854078	1353.88	471	661979	4.24909					19	1		3.40683	2.7319	0.872904	9542.77	3246.51	1502865				1	19	45	1.12266	0.578872	0.671788	4970.69	3752	48232
	1	3	67	7.46029	6.18145	0.868506	1430.32	480	773084	3.90363					19	2		17.248	14.3367	0.844612	12545.3	3162.05	14998170				1	20	1	9.64434	8.29343	0.890679	3314.97	1658	1761781	4.57589
	1	3	68	5.44768	4.55054	0.892112	1106.22	475	355025	3.06114					19	3		9.25691	7.71045	0.857648	15627.9	3323.04	10275464				1	20	2	8.49093	7.25933	0.879873	2242.1	1453	746813	2.808
	1	3	70	8.56626	7.09281	0.860003	1158.95	455	640753	3.95975					19	4		23.9638	20.6307	0.879181	13497	3722.4	19369784				1	20	3	6.69527	5.5135	0.859984	2657.53	1506	878071	4.69118
	1	3	73	7.629	6.38898	0.884137	1217.96	500	588712	3.8697					19	5		17.8216	15.1118	0.874014	15414.7	3484.28	20416383				1	20	4	11.3007	9.5803	0.876924	3477.92	1489	2564803	9.21513
	1	3	74	15.2301	12.5869	0.843736	1265.59	476	1350886	4.179					19	6		14.1399	12.1472	0.881831	12891.2	3095.15	13109633				1	20	6	11.7964	9.73063	0.855874	3312.03	1598	2148772	3.39349
	1	3	75	6.47912	5.33955	0.873466	962.376	485	317074	3.62363					19	7		20.5068	17.2329	0.849975	10146.9	2908.95	13251865				1	20	7	10.3981	8.46792	0.835512	4360.72	1616	3136362	1.92385
	1	3	76	9.99103	8.29856	0.855353	1281.49	471	876904	4.92581					19	8		17.7862	15.1559	0.878981	6825.77	2018.02	8291702				1	20	8	15.8404	12.9338	0.824984	3563.32	1525	3483441	6.35373
	1	3	77	5.9457	4.89417	0.863463	976.859	455	320773						19	10		46.9038	39.9759	0.856327	8738.45	2146.73	31144887				1	20	9	7.05768	5.55327	0.810783	2615.76	1465	768354
	1	3	78	6.59251	5.48277	0.879489	1186.42	479	479131	3.9234					19	11		9.34187	7.89321	0.887559	9806.14	2701.58	6338279				1	20	10	8.89296	7.04329	0.819615	3116.59	1491	1676950	1.3167
	1	3	79	5.16116	4.27335	0.897065	1079	480	314656	2.59559					19	117		27.6498	23.5074	0.85471	11936.4	2465.33	26072026				1	20	11	13.5714	10.7647	0.786517	4865.38	1573	5299977	6.21618
	1	3	81	6.41537	5.33819	0.87883	970.346	472	317985	3.27481					19	118		8.94158	7.52098	0.893483	9355.35	2601.23	6050072				1	20	12	26.0225	21.0813	0.825147	4108.82	1419	8524931	3.84452
	1	3	82	5.87444	4.85745	0.877241	1011.44	477	317970	3.21116					20	1		34.9248	29.5792	0.858181	11806.2	2454.78	29650539				1	20	13	9.19865	7.69593	0.874559	2878.76	1527	1343761
	1	3	83	4.88441	4.00377	0.867762	995.43	464	253820						20	2		18.3248	15.7037	0.881827	14058.4	2632.25	18754215				1	20	14	22.2098	18.344	0.825776	3243.83	1370	4812862
	1	3	84	8.23733	6.82255	0.86765	1253.51	455	734724	3.32531					20	4		17.7653	15.1186	0.869514	12983.1	2859.49	15484618				1	20	15	5.6921	4.45431	0.813575	4613.34	1675	1643253
	1	3	85	7.50232	6.25129	0.875644	1134.44	464	508292						20	9		24.8767	21.0554	0.854355	13901.9	2266.21	27091312
	1	3	86	5.07959	4.13208	0.866047	886.976	454	218584						20	11		9.29084	7.77074	0.86905	12393.9	2488.35	8317011
	1	3	87	6.07819	4.99128	0.864752	974.017	453	315445	3.19159					20	12		28.3622	23.9882	0.848855	12916.3	2152.06	28795289
	1	3	88	6.24878	5.14448	0.866694	1057.58	453	398434						20	13		15.8172	13.2795	0.8571	13251.8	2444.84	16141256
	1	3	89	6.31945	5.20021	0.873516	885.562	453	275999						20	15		8.96396	7.53631	0.870091	6726.24	2675.56	3628024
	1	3	90	7.68488	6.41981	0.871164	1318.44	460	745013	4.042					20	17		26.3403	22.5374	0.861582	13120.6	2206.1	29486307
	1	3	91	6.04366	5.0145	0.879854	1102.98	476	388106	3.2041					20	18		25.7053	22.0607	0.866403	12855.4	2472.62	27929473
	1	4	1	7.71685	6.26445	0.837512	1108.02	463	505072						20	19		8.35479	7.01444	0.877065	11006.5	2530.04	6494020
	1	4	2	7.97101	6.75588	0.872442	880.62	450	404336	4.12822					20	20		2.74369	2.04225	0.827858	10313.2	2710.93	1646711
	1	4	4	7.49318	6.20919	0.862778	1073.98	441	471463	3.8796					20	22		13.5189	11.6461	0.886354	11827.7	2402.35	12764367
	1	4	5	8.14895	6.85478	0.883598	1027.15	488	480972	4.00493					20	24		9.96314	8.59624	0.904979	9624.96	2726.67	6736798
	1	4	6	7.19367	5.95503	0.861217	834.407	448	324035	3.27302					20	119		2.02441	1.52585	0.844924	6565.9	2425.99	598892
	1	4	7	10.0512	8.44337	0.861724	1272.33	452	849047	4.66399					20	120		23.4021	20.3504	0.880983	12339.8	2313.69	23432803
	1	4	8	10.6734	8.80568	0.85721	1164.22	473	780256	5.0721					20	121		23.425	19.6729	0.860913	14751.6	2533.95	28549523
	1	4	9	10.9981	9.27823	0.864198	1091.8	456	792072	5.37412
	1	4	11	5.66819	4.58736	0.853777	1058.61	474	320570
	1	4	12	5.96988	4.88519	0.857435	951.731	447	303003
	1	4	14	6.14456	5.0723	0.87759	960.239	460	302336
	1	4	15	6.63943	5.56264	0.884041	1030.51	444	406095	3.3549
	1	4	16	5.54618	4.51475	0.873589	917.426	469	228926
	1	4	19	6.51199	5.44719	0.886945	1154.96	466	450941	3.55507
	1	4	20	5.10488	4.28182	0.896734	1180.48	477	373067	2.46031
	1	4	21	5.62399	4.59938	0.874761	1113.31	464	353278
	1	4	22	8.00725	6.82716	0.891973	1102.7	465	519681	3.40319
	1	4	23	6.32219	5.16508	0.856935	887.732	450	279141	2.34314
	1	4	24	6.39528	5.39825	0.897965	1256.62	486	494396	2.92892
	1	4	25	4.33168	3.51245	0.86972	793.458	480	129138
	1	4	27	8.49213	7.10672	0.864029	1296.6	470	750253	2.31077
	1	4	28	4.11887	3.45044	0.919356	1121.02	475	245356
	1	4	29	8.09924	6.76914	0.870829	1179.85	461	615933	3.57814
	1	4	30	6.67721	5.49931	0.871414	1197.72	462	510645	3.57803
	1	4	32	4.82348	3.9215	0.875611	997.305	454	269312	2.25009
	1	4	34	7.31915	5.98938	0.865291	1284.71	467	624619	3.54871
	1	4	35	6.96563	5.77172	0.882578	1385.1	531	577741	3.45111
	1	4	36	6.72627	5.53253	0.860153	1278.14	476	582704	3.09788
	1	4	37	6.15992	5.03597	0.856528	1285.01	505	484062
	1	4	38	6.13527	5.04287	0.87317	999.253	459	339052	3.31664
	1	4	39	6.28394	5.09809	0.84308	1121.46	460	429978	3.35263
	1	4	40	6.52073	5.38542	0.860261	1231.19	464	535531	2.80147
	1	4	41	9.14036	7.45392	0.857394	1564.62	507	1003909	4.21461
	1	4	44	5.53843	4.44061	0.860373	1264.83	492	402067
	1	4	45	8.27884	7.04302	0.899898	1133.51	475	588009	4.4196
	1	4	47	7.72322	6.42626	0.878972	1008.65	459	457478	3.46248
	1	4	48	6.84284	5.56433	0.847273	1387.06	490	682925
	1	4	50	7.92283	6.72068	0.889813	1072.77	472	503790	3.89936
	1	4	54	7.72567	6.51179	0.879147	1068.32	469	502735	4.221
	1	4	55	10.1691	8.36957	0.846584	1312.57	458	904744	4.8
	1	4	56	7.01014	5.87533	0.883204	1174.65	471	505584	3.58751
	1	4	57	4.89605	3.97751	0.875311	961.144	470	247397
	1	4	59	5.83631	4.80364	0.87789	1406.02	523	528681	2.69246
	1	4	60	9.91567	8.14601	0.842332	1091.95	449	652835	5.64513
	1	4	61	7.8558	6.41271	0.847671	1359.47	466	767405	3.57969
	1	4	62	4.88741	3.99632	0.8779	910.134	457	231309
	1	4	63	9.76027	8.25744	0.886629	1019.33	482	556622	4.60842
	1	4	64	5.62005	4.61577	0.872076	856.444	471	207689	3.09791
	1	4	65	5.66354	4.5462	0.84989	1141.66	467	379727
	1	4	66	8.47918	7.08742	0.870823	1227.12	466	671767	4.9947
	1	4	67	4.9371	4.05728	0.883954	1180.9	489	346776	2.34586
	1	4	68	7.7305	6.48455	0.880801	1091.3	474	486967	4.23917
	1	4	69	4.45765	3.55082	0.849667	1030.96	459	242800
	1	4	71	5.80476	4.69435	0.857487	937.063	459	300597	3.23418
	1	4	72	8.12867	6.8247	0.878061	1063.67	473	501858	3.78159
	1	4	73	6.18127	5.18297	0.887844	981.16	459	324525	2.7845
	1	4	74	5.35741	4.22516	0.833511	873.39	464	195524
	1	4	75	5.14303	4.12854	0.854116	1010.2	459	276358
	1	4	76	7.29557	5.94707	0.848446	1424.56	485	712761	3.22497
	1	4	77	5.6717	4.47051	0.836623	1413.75	501	476048
	1	4	79	7.81068	6.53163	0.871839	1050.17	440	508625	3.31684
	1	4	80	7.28849	6.03148	0.865587	1002.82	452	419191	3.3303
	1	4	81	6.92927	5.67589	0.863466	906.241	452	310768
	1	4	83	6.07662	5.04391	0.884069	962.976	458	314103	1.98377
	1	4	84	4.87372	3.8521	0.837991	1078.54	478	278531	2.34997
	1	4	85	7.17475	5.93998	0.864337	1028.02	451	431957	3.3624
	1	4	86	7.37667	6.14516	0.878711	1009.74	440	436147	3.81287
	1	4	88	6.02454	4.93661	0.858023	1020.41	442	354662	2.7739
	1	4	90	5.76541	4.57771	0.813958	1057.24	466	351440
	1	4	91	7.07563	5.79333	0.836364	1189.25	499	466979
	1	4	114	5.88116	4.75537	0.858116	1296.39	466	481527	3.51504
	1	4	113	0.281429	0.0271613	0.123131	908.983	756	237
	1	5	2	6.75236	5.60826	0.868492	1153.25	453	501473	3.2882
	1	5	3	11.0231	9.28758	0.855132	1069.69	450	760518
	1	5	5	6.19237	5.23444	0.896827	1078.43	483	372897	3.72509
	1	5	6	6.74096	5.57236	0.862964	1079.37	460	424293	3.25585
	1	5	7	8.07875	6.60611	0.852197	1220.72	462	642336	3.68757
	1	5	8	7.5129	6.25479	0.866804	1030.9	464	446856	3.72381
	1	5	9	6.04993	5.01632	0.880351	835.072	456	218570
	1	5	10	6.53191	5.50594	0.886007	1395.62	509	625381	3.39491
	1	5	11	5.78641	4.72482	0.859657	1078.39	473	338937
	1	5	12	7.27467	6.02286	0.871484	1156.7	471	539787	3.27924
	1	5	13	7.57295	6.3992	0.882711	1254.25	475	624234	3.76317
	1	5	14	14.6491	12.5025	0.872108	1138.45	469	1021875	4.63594
	1	5	15	6.99013	5.78835	0.875886	1222.36	457	571904	3.45363
	1	5	16	6.15152	5.18982	0.891027	1096.97	503	382926	3.35097
	1	5	18	5.83786	4.84775	0.876822	1004.49	493	301452
	1	5	19	7.91467	6.38939	0.834561	1620.18	542	865745	4.3026
	1	5	20	7.24253	6.124	0.875646	1153.88	503	507263	3.18594
	1	5	21	6.2445	5.18367	0.880856	963.023	479	289429	2.82854
	1	5	22	6.70246	5.58634	0.871333	1031.97	471	399075	3.31016
	1	5	24	6.97218	5.7341	0.858092	1265.81	480	583946	3.87046
	1	5	26	5.99128	4.7955	0.86035	818.387	492	184734
	1	5	27	6.53193	5.29529	0.838689	1119.08	506	405361	3.1387
	1	5	29	7.56771	6.31539	0.865294	1163.47	472	560050	3.4391
	1	5	30	9.35959	7.67767	0.858759	1287.74	471	893656	4.795
	1	5	31	5.31776	4.20824	0.837249	1038.5	481	274911
	1	5	33	6.03135	4.88407	0.870758	1255.28	499	463183	2.85086
	1	5	34	5.96929	4.76723	0.815195	1114.26	482	366052	3.11419
	1	5	35	9.85039	8.35696	0.879989	1104.35	474	672927	4.60981
	1	5	36	10.0115	8.37766	0.84374	1107.43	463	695694	4.76147
	1	5	37	9.54972	7.79649	0.841378	1328.66	489	842130	4.56458
	1	5	38	10.2026	8.43907	0.855014	1537.63	471	1239385	4.89158
	1	5	39	9.28192	7.57516	0.839056	1165.07	491	644608	4.53767
	1	5	41	9.46892	7.81303	0.861259	1115.6	463	669415	4.97948
	1	5	42	7.6747	6.42452	0.879162	1141.32	461	572822	3.39603
	1	5	43	8.15579	6.63227	0.843645	1277.84	469	724013	2.95031
	1	5	44	6.14782	4.99928	0.852249	1134.48	475	422903	2.73811
	1	5	45	6.78431	5.64608	0.877316	1234.85	505	517643	2.98254
	1	5	46	5.56867	4.49712	0.856647	1195.56	491	379176
	1	5	47	4.26168	3.51426	0.889525	946.862	482	196387
	1	5	48	10.3726	8.73743	0.857057	1254.52	486	849224	5.21597
	1	5	50	5.19141	4.22154	0.857787	1231.89	484	391842
	1	5	51	9.31745	7.59771	0.846698	1615.1	508	1071721	3.87107
	1	5	52	6.04781	4.91043	0.867756	1222.77	486	460108	2.74391
	1	5	53	4.78981	3.9081	0.858588	1665.28	677	569876	3.1035
	1	5	55	8.47318	7.12225	0.879945	1279.29	483	719092	3.84517
	1	5	56	8.35329	6.74321	0.840713	1312.33	518	658420	4.4047
	1	5	57	5.87785	4.7928	0.872602	1003.4	477	311358	4.03315
	1	5	58	5.43776	4.40879	0.864271	1269.94	481	438930
	1	5	59	8.15685	6.92222	0.892884	1375.32	497	730819	4.49329
	1	5	60	10.4523	8.81161	0.860537	1125.57	456	776675	5.67547
	1	5	61	7.26577	6.34915	0.918778	1199.33	496	548249	3.76911
	1	5	62	6.66384	5.38163	0.845937	1180.13	473	473523	3.53814
	1	5	64	7.80354	6.38399	0.850627	1300.86	505	642785	3.80404
	1	5	65	5.24853	4.23985	0.870645	878.349	491	201842	1.99895
	1	5	66	10.5563	8.78357	0.865919	1480.47	486	1120245	5.15766
	1	5	67	6.14307	5.16472	0.902289	1097.79	496	366188	3.07848
	1	5	68	7.24587	5.98944	0.862077	1360.48	482	665619	4.83628
	1	5	69	6.78727	5.55979	0.865474	1075.72	471	446227	3.33455
	1	5	70	6.80165	5.53019	0.848675	1019.45	462	399462
	1	5	71	7.30893	6.09853	0.87749	1066.15	482	433701
	1	5	72	6.32997	5.24948	0.866262	907.72	499	278042	3.40955
	1	5	73	7.07437	5.95117	0.884198	1251.11	474	587877	2.8965
	1	5	74	9.5041	7.83295	0.840402	1023.43	515	517363	3.77457
	1	5	75	6.34688	5.19176	0.863909	1316.94	490	549035	2.80713
	1	5	76	9.53888	8.05656	0.873332	1299.6	457	894778	4.74036
	1	5	77	5.93283	4.91344	0.879113	1343.62	513	492561	2.80935
	1	5	78	9.09186	7.69763	0.882525	1394.58	495	875901	4.31377
	1	5	79	5.9964	4.93717	0.873736	1190.08	485	435405
	1	5	80	6.93579	5.75985	0.881217	991.271	473	373492	3.07419
	1	5	81	7.29496	6.09378	0.881182	1071.5	467	474585	3.3387
	1	5	82	8.41204	6.96377	0.859754	1221.75	465	665734	4.46507
	1	5	83	7.46993	6.14251	0.868731	1318.24	470	691961	3.51402
	1	5	84	7.77459	6.50293	0.866117	1296.29	470	677008	4.18731
	1	5	85	8.53741	7.07583	0.858432	1134.37	486	608425	4.05807
	1	5	86	8.21868	6.95468	0.890212	898.149	468	348354	4.17201
	1	5	87	9.27662	7.71769	0.866296	1119.28	458	650654	5.48794
	1	5	88	10.6898	8.80013	0.840696	1222.71	459	868591	5.07237
	1	5	89	9.20939	7.61597	0.838979	1099.73	472	601582	4.4548
	1	5	90	5.21577	4.25033	0.888416	898.95	472	224771
	1	5	91	6.72136	5.49858	0.864604	1018.79	463	385225	3.18803
	1	5	92	7.1832	5.82289	0.854738	1192.69	489	489414	3.74031
	1	5	93	6.52834	5.42218	0.871826	1387.07	479	629711	2.63766
	1	5	94	6.79449	5.5684	0.826404	1131	497	442311
	1	5	95	8.73979	7.44907	0.896579	1239.39	500	658645	4.82671
	1	6	1	5.81787	4.91213	0.905381	1123.32	468	382982	1.55594
	1	6	2	6.52495	5.36726	0.870632	1093.7	453	417484	3.18586
	1	6	3	12.3883	10.3844	0.860421	1034.8	491	717571	6.3767
	1	6	4	6.64656	5.49851	0.87435	1047.71	482	415736	3.70041
	1	6	5	5.83593	4.8325	0.877497	991.971	517	265345
	1	6	6	7.62844	6.34361	0.863626	996.44	551	335240	4.41818
	1	6	7	8.68859	7.39639	0.883338	1364.35	469	789918	4.0553
	1	6	8	8.54315	7.1887	0.886347	3075.2	545	2547350	4.91243
	1	6	9	6.19174	5.16729	0.872074	872.17	472	272026
	1	6	10	7.455	6.21986	0.872818	978.488	470	390932
	1	6	11	4.68854	3.78092	0.859271	1259.29	497	348034	1.52438
	1	6	12	6.60109	5.52959	0.884549	1007.35	476	353562
	1	6	13	5.84583	4.85856	0.878648	900.225	477	234882
	1	6	14	5.93502	4.79915	0.863293	1051.21	487	330384	3.33776
	1	6	15	7.77435	6.67094	0.891102	925.106	492	349110	4.29095
	1	6	16	6.41271	5.19946	0.852933	1351.97	490	591085	3.08323
	1	6	17	7.5298	6.26988	0.870002	1136.65	465	538544	3.90564
	1	6	18	5.65354	4.61272	0.860205	1257.52	485	449249	2.10159
	1	6	19	7.92062	6.61575	0.874938	1319	481	702072	3.90111
	1	6	20	6.63128	5.56487	0.879991	1071.67	479	399271	3.15126
	1	6	21	9.49654	9.60108	1.1863	1183	455	928974	4.73559
	1	6	22	5.38704	4.47766	0.887243	1098.73	488	353740	3.27501
	1	6	23	4.45021	3.59044	0.8661	1194.78	476	301308
	1	6	24	8.11182	6.71178	0.858084	1266.51	467	668387	3.72427
	1	6	25	5.96008	4.89851	0.861091	917.402	485	281018	3.24385
	1	6	26	6.26443	5.05516	0.845108	1149.34	482	403552
	1	6	27	6.28809	5.35157	0.897803	1110.21	477	404592	3.06209
	1	6	28	10.0665	8.58222	0.882166	1178.2	484	723619	5.14607
	1	6	29	7.23553	6.08192	0.883423	1074.96	492	448640	3.18833
	1	6	30	7.8439	6.60916	0.885918	1422.25	484	784438	3.60039
	1	6	31	6.60389	5.46964	0.866001	1109.76	483	432608	3.51395
	1	6	32	5.22072	4.31505	0.884891	1179.32	487	347135
	1	6	33	5.61487	4.60407	0.867981	1220.74	475	418757	3.08016
	1	6	34	7.38112	6.07818	0.85976	1127.19	474	499064	3.22434
	1	6	35	8.38493	7.03506	0.864876	1353.72	492	859614	4.66146
	1	6	36	7.41895	6.31943	0.895572	1179.35	504	510419	3.95081
	1	6	38	8.23425	7.02175	0.892232	1116.97	475	555628	3.89487
	1	6	39	9.79401	8.13462	0.849996	1035.78	467	601050	5.1563
	1	6	40	8.83946	7.4079	0.862243	1349.53	477	820485	4.80153
	1	6	41	7.47612	6.25649	0.877624	1140.25	481	503934	3.38855
	1	6	42	5.62399	4.42967	0.859177	1293.94	509	444283
	1	6	43	9.15202	7.55304	0.852882	1359.43	505	789906	4.83264
	1	6	44	5.83268	4.82498	0.879833	1187.35	492	398358
	1	6	46	7.89926	6.60163	0.873382	1378.51	479	752209	3.6229
	1	6	49	6.28228	5.12517	0.867965	1087.34	478	383049	3.24124
	1	6	50	6.01161	4.94734	0.867103	1015.3	472	334259	3.05051
	1	6	51	5.34547	4.34655	0.873173	1483.07	566	552802	3.85118
	1	6	52	15.9605	13.5307	0.863772	1818.7	553	2085799	7.39676
	1	6	54	4.67632	3.92115	0.913547	994.677	477	236968
	1	6	55	5.49398	4.64031	0.90757	1422.83	499	522640	3.13488
	1	6	56	9.12654	7.58536	0.856184	1132.53	466	647300	4.26935
	1	6	57	6.94408	5.67323	0.861217	1396.04	489	624996	3.6972
	1	6	58	4.85157	3.93036	0.866225	889.086	475	196520
	1	6	59	9.26305	7.71481	0.857627	1288.09	480	786155	4.8526
	1	6	60	7.51304	6.1664	0.858428	915.62	455	362914
	1	6	61	6.98158	5.79664	0.876153	1197.36	478	500609	3.59743
	1	6	62	4.08778	3.33318	0.871666	859.993	472	156645
	1	6	63	8.82284	7.33102	0.857463	1444.22	466	906360	4.92943
	1	6	64	7.59431	6.34586	0.868484	1041.84	482	432643	4.25664
	1	6	65	7.00486	5.87686	0.868962	920.522	455	356503	3.63115
	1	6	66	5.31119	4.3589	0.867407	930.046	475	238027
	1	6	67	9.70656	8.15326	0.860016	1352.73	470	910060	4.20868
	1	6	68	8.52588	7.06332	0.862948	1280.39	477	687387
	1	6	70	8.7351	7.35531	0.875506	1311.31	494	731135	4.68998
	1	6	71	8.65378	6.91605	0.835903	1127.12	510	467925	4.10937
	1	6	72	6.64316	5.49909	0.870377	1027.67	474	382706	3.5016
	1	6	73	10.2926	8.54208	0.853125	1231.89	466	828441	4.86955
	1	6	75	7.10127	6.03079	0.897715	1071.35	490	423442	3.57563
	1	6	76	6.69812	5.69686	0.901761	1070.35	478	422592	2.95664
	1	6	77	8.48537	7.05832	0.858431	1235.87	463	691089	4.6008
	1	6	79	4.77919	3.76169	0.83506	1101.97	467	280176
	1	6	81	7.10796	5.89614	0.876863	1155.95	476	482193	3.54463
	1	6	82	5.85186	4.77041	0.854766	933.223	460	271420
	1	6	84	5.1783	4.38547	0.910225	997.042	463	284962
	1	6	85	8.74566	7.36719	0.876206	1236.22	471	687693	4.48206
	1	6	86	7.06753	5.65417	0.823239	1144.12	489	458732
	1	6	88	6.42165	5.33274	0.87569	1187.02	472	458163
	1	7	2	7.02985	5.82637	0.876136	1085.91	473	429240	3.58289
	1	7	3	5.84619	4.8042	0.861617	888.681	460	241015	2.19408
	1	7	4	14.8086	12.4373	0.853722	998.741	459	871295
	1	7	5	5.09729	4.24323	0.880078	853.091	470	207196	2.81926
	1	7	6	8.72952	7.48214	0.888328	1165.83	484	614328	4.36793
	1	7	8	6.58076	5.46766	0.888486	1217.41	499	456855	2.66853
	1	7	9	9.84816	8.24688	0.862529	992.973	495	549548	3.64951
	1	7	10	7.517	6.29672	0.869286	1060.21	518	428624
	1	7	11	7.56068	6.23287	0.869469	1157.96	469	543660	3.6561
	1	7	12	8.42594	7.01802	0.868317	992.257	456	470975	3.58894
	1	7	13	5.68229	4.71584	0.873181	1040.61	487	287586
	1	7	14	10.1043	8.60047	0.875128	1405.52	480	1017015	5.19968
	1	7	15	6.78741	5.60798	0.866158	854.741	472	276583	3.7627
	1	7	16	8.91074	7.33684	0.848411	1395.57	472	851160	3.93539
	1	7	17	6.18767	5.08165	0.860919	1106.03	470	424475	2.95452
	1	7	19	9.40969	7.89891	0.871984	1054.5	487	558326	4.41484
	1	7	20	6.5256	5.37191	0.858169	1025.09	484	361592	3.80109
	1	7	21	7.45657	6.14228	0.861548	1122.5	477	497749	3.47264
	1	7	22	9.24746	7.64271	0.860492	1200.76	476	718962	4.99827
	1	7	23	7.68179	6.39581	0.867939	1162.43	484	545437	3.84149
	1	7	24	5.94613	4.83567	0.843443	1326.74	517	495068	2.28345
	1	7	25	8.41461	7.01572	0.874695	1210.14	479	652252	4.38551
	1	7	26	9.7884	8.00041	0.839099	1229.34	475	795712	2.48797
	1	7	27	6.83798	5.38002	0.834723	1150.57	494	452465	3.50029
	1	7	28	7.3382	6.18824	0.8756	1140.35	486	501318	3.53249
	1	7	29	5.81312	4.79197	0.868438	1072.28	480	335420
	1	7	30	6.20565	5.09232	0.866168	1084.79	481	387448	2.98096
	1	7	32	6.47284	5.29388	0.867844	1165.57	483	434581	3.05077
	1	7	33	7.87446	6.67218	0.8761	1031.67	478	474716	3.94162
	1	7	34	10.4589	8.89861	0.880596	1064.52	479	658777	5.48308
	1	7	35	5.67736	4.63065	0.862539	1343.13	491	485046	2.78387
	1	7	36	7.1049	5.96816	0.877233	1372.38	486	652141	3.14829
	1	7	37	6.01322	4.9192	0.872723	1060.7	480	342695
	1	7	38	7.91408	6.40789	0.842557	1515.38	483	828823	3.3995
	1	7	39	8.49402	7.09039	0.861623	1037.09	468	516545	3.98156
	1	7	40	6.19832	5.13444	0.871728	1106.94	479	396035	2.76512
	1	7	41	6.91786	5.63313	0.851579	1146.1	480	473299	3.62061
	1	7	42	8.08919	6.615	0.854342	1156.79	459	604263	3.81572
	1	7	43	7.41281	6.14552	0.867299	1264.66	485	594845	3.54716
	1	7	44	8.72001	7.33323	0.866348	1108.6	475	589123	4.98421
	1	7	45	6.24451	5.12886	0.863613	1087.31	482	383612	3.09159
	1	7	46	8.21376	6.85105	0.874294	1121.01	478	555200	3.38884
	1	7	47	5.03707	4.09723	0.86903	1263.56	491	381632
	1	7	48	8.75513	7.22628	0.868778	1234.71	497	651921
	1	7	49	5.27487	4.31251	0.873693	1022.26	490	271580	2.55175
	1	7	50	19.0301	16.177	0.858404	1057.38	458	1354988	13.8185
	1	7	51	7.44779	6.13512	0.856029	1305.08	496	603383
	1	7	52	8.42912	6.78279	0.829295	1334.75	483	752068	4.59044
	1	7	53	5.29113	4.38671	0.88531	1059.83	489	300207
	1	7	54	7.46016	6.17139	0.853876	1286.57	496	616022	4.19741
	1	7	55	5.69163	4.71453	0.882724	1224.67	493	407649	2.27327
	1	7	58	5.64775	4.60287	0.868502	1268.18	491	429125
	1	7	59	5.58389	4.46463	0.850301	877.931	456	232443
	1	7	60	7.44768	6.03785	0.851715	1172.74	491	505946
	1	7	61	8.16697	6.63702	0.84383	1343.53	481	732819	3.35415
	1	7	62	9.43851	7.97793	0.865474	1041.09	491	555488	4.32755
	1	7	63	3.73978	2.98865	0.867598	1030.91	484	194120
	1	7	64	7.45937	6.12587	0.866443	1242.35	499	572230	3.53476
	1	7	66	6.79117	5.58698	0.86556	1149.87	503	442355	3.25197
	1	7	67	6.10062	5.0189	0.876616	1171.71	493	397352
	1	7	68	6.56381	5.47819	0.878356	1070.32	477	402889	2.94997
	1	7	69	6.01927	4.84362	0.85604	1063.4	475	356136	3.1777
	1	7	70	4.13706	3.64512	0.93397	1612.03	616	410801
	1	7	71	6.2837	5.15247	0.867566	1222.78	484	493488	3.23694
	1	7	72	6.31129	5.24137	0.876831	1060.85	496	349537	2.9062
	1	7	73	7.69562	6.4566	0.884001	1204.81	510	525187	3.63458
	1	7	74	5.2418	4.33934	0.890422	823.292	484	166906
	1	7	75	14.9455	12.5869	0.845863	1084.92	462	1040875	4.72885
	1	7	76	6.8624	5.5017	0.843429	1126.1	483	455302	3.11591
	1	7	77	8.46944	7.13375	0.880128	1156.86	481	603772	4.92844
	1	7	78	7.31522	5.99441	0.864062	1132.21	481	475194	4.14271
	1	7	79	9.878	8.19918	0.865955	1164.68	483	687294	4.14314
	1	7	80	4.44581	3.61742	0.874999	1161.3	484	332456
	1	7	81	9.41963	7.86744	0.868016	1213.14	477	722123	5.12759
	1	7	82	9.25654	7.64955	0.844979	1026.7	489	469201
	1	7	83	6.98644	5.79975	0.871462	870.597	473	278950	3.26252
	1	7	84	9.31795	7.78577	0.863935	1051.87	460	576562	4.29441
	1	7	85	5.50745	4.71559	0.924358	1041.61	485	293447
	1	7	86	4.87504	3.91678	0.857788	888.215	467	188211
	1	7	87	7.82934	6.49927	0.866502	879.045	453	343861	4.17271
	1	7	88	6.92731	5.62913	0.844929	1134.72	500	417246	3.41684
	1	7	89	7.00524	5.85782	0.878474	1090.23	480	445679	3.92362
	1	7	116	5.8262	4.72937	0.865763	1287.21	499	449291	3.50041
	1	7	115	5.30177	4.30493	0.870331	1105.04	501	305620
	1	7	118	3.66707	2.69432	0.786575	1879.69	528	471276
	1	7	117	3.40035	2.59387	0.864208	1059.56	556	179057	0.530004
	1	8	1	6.3481	5.20232	0.862656	943.313	467	321197
	1	8	2	8.22182	6.69773	0.830937	1304.8	505	677322	4.43942
	1	8	3	12.2253	10.3074	0.840339	1119.65	470	864245	3.98517
	1	8	4	5.28934	4.36577	0.869832	1172.76	482	383622	2.43397
	1	8	5	8.42585	6.98979	0.850269	1182.96	505	650327
	1	8	6	6.10227	4.97476	0.866558	1086.94	477	382774
	1	8	7	4.61786	3.8536	0.899495	1096.39	508	268537
	1	8	8	8.40982	7.00174	0.876645	1326.58	502	724641	3.94767
	1	8	9	4.52457	3.71923	0.886862	1114.01	505	266407
	1	8	10	7.24282	6.16225	0.888857	1265	477	626788	3.36278
	1	8	11	6.09356	5.12102	0.894261	1045.79	493	337652
	1	8	12	6.13108	5.07553	0.88109	1095.43	492	378735
	1	8	14	8.19331	6.93973	0.879895	1101.27	483	548142	4.57885
	1	8	15	8.0357	6.78923	0.884936	1277.43	510	654748	3.80825
	1	8	16	7.26405	5.95508	0.860143	1159.25	503	532329	2.89065
	1	8	17	5.53248	4.54589	0.875256	1106.81	488	349240
	1	8	19	6.41379	5.36542	0.881586	969.107	468	332166
	1	8	20	5.28024	4.41658	0.899336	1039.63	508	287624	3.13732
	1	8	21	8.85677	7.47329	0.879232	1258.14	495	731531	4.24022
	1	8	22	7.49238	6.14107	0.850911	1423.43	516	753074	3.18589
	1	8	23	9.63733	7.88728	0.859442	1469.57	505	943674	5.02711
	1	8	24	8.76963	7.28149	0.864127	1337.64	488	801552	4.12333
	1	8	25	8.87217	7.2454	0.853252	1391.3	507	833930	4.32078
	1	8	26	6.92734	5.55848	0.850807	1291.26	511	579721
	1	8	27	8.68176	7.2694	0.870879	1215.24	487	697890	4.88639
	1	8	29	5.94827	4.95465	0.882589	1097.68	494	370632	2.93707
	1	8	30	9.08668	7.5856	0.88251	1334.47	514	791439	4.6501
	1	8	31	8.16771	6.74774	0.86091	1067.91	479	540548	4.33838
	1	8	32	8.12493	6.81949	0.86928	1322.18	498	707851	4.27119
	1	8	33	9.8498	8.33145	0.875178	1007.88	485	540764	4.47057
	1	8	34	6.40751	5.09267	0.842026	1083.44	480	384838
	1	8	35	7.34674	6.10258	0.875987	1266.7	498	598511	4.027
	1	8	36	7.14616	5.87183	0.874802	1403.8	544	630815
	1	8	37	7.33654	6.17553	0.894552	1272.96	522	585344	4.87272
	1	8	38	7.95353	6.58396	0.86584	1688.19	529	967721	3.32715
	1	8	39	7.74679	6.33988	0.834724	978.628	474	394748	3.64307
	1	8	40	7.76488	6.39204	0.868759	1476.4	497	830819	3.6487
	1	8	41	9.59115	7.7153	0.835279	1347.45	489	873909	5.10658
	1	8	42	5.24093	4.35823	0.891394	1034.54	495	296037	2.70537
	1	8	43	4.95393	3.95229	0.858955	1076.81	521	264211
	1	8	44	7.82677	6.52851	0.873896	1055.47	468	486846	3.983
	1	8	45	8.0544	6.84592	0.884416	1065.51	503	487847	4.36172
	1	8	46	6.19473	5.20074	0.884591	838.597	476	230313
	1	8	47	4.97194	4.18396	0.902376	1244.95	503	383504	2.26983
	1	8	48	8.41333	6.98301	0.867229	1022.39	488	491780	4.02549
	1	8	49	7.36319	6.06272	0.861781	1209.27	481	587615	3.36141
	1	8	50	6.46613	5.51638	0.902776	976.701	494	335145	2.98406
	1	8	51	5.64865	4.65591	0.865821	1002.64	482	301853
	1	8	52	6.33852	5.14814	0.846726	1087.76	484	395360	3.58144
	1	8	53	5.7352	4.90493	0.923422	1105.39	493	383217	2.83186
	1	8	54	5.86787	4.79119	0.855789	1130.59	500	370768	2.66058
	1	8	55	5.49154	4.43868	0.854372	1021.24	551	248345	2.60732
	1	8	58	7.827	6.40361	0.847546	1518.15	508	835485	3.56227
	1	8	59	5.43688	4.3373	0.851333	1045.37	491	302841
	1	8	60	7.64822	6.21944	0.854055	1273.7	495	588535	3.73397
	1	8	61	7.39948	6.21882	0.886793	1111.56	507	458604	3.51814
	1	8	62	5.58367	4.51252	0.863502	1275.4	529	419632	1.61763
	1	8	63	6.2445	5.16201	0.887539	1186.15	527	398215
	1	8	64	10.4331	8.58116	0.852226	1192.69	477	823510	5.07598
	1	8	65	6.02744	4.84285	0.843026	987.851	481	305426
	1	8	66	6.05714	4.95944	0.86097	1041.89	493	332811	3.10805
	1	8	67	6.61032	5.64202	0.897151	1168.16	491	474868	3.73982
	1	8	68	8.37006	7.02769	0.876548	1168.5	476	649585	4.46458
	1	8	71	7.76262	6.29129	0.84806	1092.03	481	510952	4.39945
	1	8	72	6.87965	5.57011	0.853124	1133.33	513	464762	3.01394
	1	8	73	6.98915	5.869	0.877226	1238.55	489	551430	3.57667
	1	8	74	6.21069	5.1009	0.863084	1141.68	484	407228
	1	8	76	9.18164	7.57581	0.85478	1291.62	479	810486	3.34802
	1	8	77	6.17111	4.87153	0.839387	1489.04	546	587168	2.70214
	1	8	78	6.93467	5.61618	0.853597	1236.61	487	530360	3.82349
	1	8	79	6.44266	5.217	0.860654	1046.29	528	322283
	1	8	80	9.96762	8.43657	0.865846	1311.89	482	905318	3.96395
	1	8	81	8.03271	6.71795	0.865154	1291.28	479	703180	4.55206
	1	8	82	5.75163	4.78407	0.888524	846.692	478	217007
	1	8	83	5.10658	4.20145	0.869068	1009.19	477	269455
	1	8	84	4.48398	3.64295	0.86145	960.247	482	211935
	1	8	85	6.37726	5.30597	0.871881	1477.71	492	688491	3.03192
	1	8	86	6.17684	5.07903	0.869628	881.519	467	262460	3.03856
	1	8	87	7.00608	5.85501	0.873542	1331.87	471	671775	2.93145
	1	8	88	5.11101	4.0578	0.849452	838.473	461	195046
	1	8	89	6.1736	5.21985	0.898756	1772.53	505	863163	3.12042
	1	8	90	5.78978	4.70526	0.864258	1050.7	502	314086	2.55696
	1	8	91	8.52531	6.98701	0.84705	1092.71	482	544588	4.17195
	1	8	92	9.91124	8.32036	0.872882	1207.88	469	810006	5.4276
	1	8	93	5.77442	4.83303	0.87946	810.379	478	197511
	1	8	94	6.79151	5.5469	0.865643	1109.99	481	453042	3.12775
	1	8	95	6.19868	5.07028	0.87786	962.239	487	299909	1.06878
	1	8	120	8.32298	6.86977	0.863081	1355.5	499	747178	4.49627
	1	8	119	10.0181	8.19809	0.857314	1528.12	514	1047716
	1	9	2	8.58228	7.1643	0.864851	1187.95	470	667818	4.55589
	1	9	3	5.9029	4.99242	0.89875	1244.81	477	460408
	1	9	4	8.75503	7.37617	0.872367	1101.3	520	558072	5.1615
	1	9	5	6.34937	5.3182	0.887849	1004.42	482	333199	3.16356
	1	9	6	5.24497	4.2452	0.854844	856.12	528	158418
	1	9	7	8.09131	6.84391	0.87376	1185.65	474	638556	1.83
	1	9	8	6.31237	5.24714	0.873065	996.404	462	346586	2.97219
	1	9	9	8.43419	7.04234	0.871257	1133.65	454	614914	3.53506
	1	9	10	7.3088	5.99173	0.852528	883.656	474	337609	3.80196
	1	9	11	8.88209	7.54092	0.876855	1262.52	482	743504	4.16051
	1	9	12	10.4965	8.87883	0.869979	1276.47	485	897017	4.47936
	1	9	13	8.39599	6.88855	0.858368	1211.79	471	661766	3.98018
	1	9	14	7.07501	5.95556	0.895292	1063.11	504	392887	3.8448
	1	9	15	9.13521	7.68613	0.87931	1031.27	476	548246	4.32996
	1	9	16	5.53251	4.53971	0.866834	919.552	493	244327	5.14153
	1	9	18	9.90428	8.4153	0.881098	1075.94	488	627112	4.63792
	1	9	19	6.97147	5.79448	0.861897	1167.11	472	513230	3.33685
	1	9	20	4.69949	3.78455	0.855984	961.199	474	224386
	1	9	21	6.65208	5.54724	0.890446	1214.07	500	494502	3.55815
	1	9	22	9.37099	7.76332	0.85617	1305.74	500	800097	5.07905
	1	9	23	6.04731	4.91453	0.85805	860.109	513	224468	5.62076
	1	9	24	6.68143	5.47969	0.870816	1117.12	475	438695
	1	9	25	10.8189	9.16594	0.867544	1126.89	470	773818	5.79022
	1	9	26	8.52125	7.11369	0.860876	1458.36	488	880485	4.89347
	1	9	27	5.75212	4.81813	0.880841	887.539	472	253020	3.06414
	1	9	28	7.62838	6.3296	0.868808	1133.37	476	553994	4.29403
	1	9	29	7.72023	6.63068	0.890835	962.139	467	427817	3.82879
	1	9	32	6.82304	5.66713	0.886018	941.836	477	327256
	1	9	33	9.2376	7.72405	0.865561	1042.08	467	580799	4.78944
	1	9	34	7.57331	6.28668	0.872818	1310.7	493	675684	3.39729
	1	9	35	5.44668	4.57125	0.896467	1076.93	479	328847
	1	9	36	7.8115	6.58942	0.878539	1118.71	481	535837	4.10071
	1	9	37	6.25835	5.11366	0.86185	914.852	473	272857	3.06506
	1	9	38	6.7303	5.4783	0.859197	1392.07	527	594591
	1	9	39	6.92745	5.60503	0.850002	1148.9	475	489074	2.80168
	1	9	40	8.8471	7.34951	0.877706	1198.82	476	692379	4.89775
	1	9	41	6.6666	5.63722	0.897431	1144.29	463	505862	2.75826
	1	9	42	7.00707	5.99389	0.905515	1007.02	489	389061	3.09235
	1	9	43	6.9372	5.75924	0.868125	1041.13	471	424395	3.16125
	1	9	44	7.28685	6.16751	0.890633	1121.5	500	463920	3.66745
	1	9	45	9.20122	7.47092	0.836391	1069.19	460	593493	4.81662
	1	9	46	4.968	4.01897	0.866539	1084.28	480	294535
	1	9	47	7.87346	6.50499	0.868581	1229.44	483	653268	3.50756
	1	9	48	5.77098	4.78971	0.887185	1098.5	485	365545	2.87125
	1	9	49	5.28622	4.33648	0.880055	985.044	491	261900	2.76701
	1	9	50	6.60818	5.35865	0.847771	1044.76	499	364499	3.81747
	1	9	51	6.32486	5.26406	0.884983	1033.04	500	344691	3.42977
	1	9	52	9.93213	8.36989	0.869982	1170.58	478	724325	5.44988
	1	9	53	6.4327	5.25399	0.869232	1166.46	481	460225	3.07942
	1	9	54	7.18086	5.9754	0.86905	1093.21	473	468260
	1	9	55	6.53762	5.40756	0.867256	932.106	463	325509	3.08918
	1	9	56	6.37598	5.27229	0.871539	900.343	459	297700	3.44868
	1	9	57	7.59634	6.4009	0.885545	1407.82	478	787414	4.15665
	1	9	58	6.00696	4.88823	0.865874	1112.66	470	407873
	1	9	59	7.45723	6.15239	0.879248	906.546	474	328768	4.20423
	1	9	60	8.67049	7.36334	0.881935	1015.79	467	530196	4.31547
	1	9	61	6.95929	5.93189	0.919847	945.702	479	343760	3.77104
	1	9	62	7.99036	6.53354	0.851762	1066.96	452	522777	3.64972
	1	9	63	8.18576	6.83784	0.881551	1063.8	467	531382	4.47288
	1	9	64	7.93956	6.56761	0.863226	1133.94	461	572323	4.00955
	1	9	65	6.7167	5.53177	0.869245	1006.47	460	386855	3.30408
	1	9	66	8.5383	7.28218	0.900467	1121.28	455	643413	4.8427
	1	9	67	6.12002	5.10249	0.882474	998.69	463	349258	2.3349
	1	9	68	5.40595	4.3756	0.855479	917.499	454	256626	2.69199
	1	9	69	7.68166	6.23242	0.843856	1071.99	465	479200
	1	9	70	11.5136	9.53387	0.846581	1086.41	471	729430	5.33361
	1	9	71	6.57017	5.20335	0.812861	1072.7	478	384147
	1	9	72	8.74993	7.20027	0.856627	1000.58	447	522895	4.64546
	1	9	73	4.93778	4.00869	0.868514	917.396	458	230612	2.6323
	1	9	74	8.15623	6.88864	0.88088	997.68	487	429790	4.89095
	1	9	76	8.40562	7.0226	0.875651	873.778	453	366738	3.62916
	1	10	1	5.33678	4.33337	0.850535	1011.4	463	304690	2.66492
	1	10	2	8.56481	7.163	0.863562	904.083	483	413069	4.32994
	1	10	4	6.47518	5.34167	0.860369	840.067	486	245790	3.48718
	1	10	5	10.7078	9.13073	0.87771	1175.65	456	822236	4.96693
	1	10	6	6.0326	4.26542	0.719938	1156.25	504	322678	3.20135
	1	10	7	7.0463	5.68931	0.840066	1088.77	456	448206
	1	10	8	9.06482	7.6041	0.8586	1179.16	452	723160	4.16588
	1	10	9	7.36854	6.13724	0.883865	1165.87	471	553820	3.22322
	1	10	10	5.75952	4.74685	0.86972	1076.82	462	353251
	1	10	11	7.71655	6.5184	0.890533	1276.54	471	657829	3.37218
	1	10	12	5.41678	4.43676	0.855959	1181.18	469	377893
	1	10	13	5.43732	4.46583	0.862237	1007.11	461	295271	2.65635
	1	10	15	9.23752	7.55263	0.843788	1411.09	462	929674
	1	10	16	9.33134	7.64357	0.850533	1138.25	464	661925	4.19501
	1	10	17	5.90364	4.88564	0.871241	1030.04	450	362959	2.42916
	1	10	18	7.06848	5.69377	0.837976	1126.46	464	505367	3.88384
	1	10	19	5.69289	4.5368	0.839042	1078.76	462	333431
	1	10	20	7.03383	5.89365	0.881663	1209.43	475	533559	3.1939
	1	10	21	9.82956	8.21623	0.860217	1271.16	461	858153	4.71417
	1	10	22	6.74842	5.58251	0.863614	1291.69	471	598763	3.25945
	1	10	23	7.33227	6.00155	0.858723	1058.32	447	475268	3.57872
	1	10	24	6.68825	5.53245	0.862214	1199.99	483	481759
	1	10	25	5.98936	4.97504	0.870196	1401.49	487	570994	3.15155
	1	10	26	6.55345	5.39135	0.863033	1137.94	470	459123	3.54974
	1	10	27	6.39557	5.19021	0.852733	983.486	460	341664	2.87561
	1	10	28	5.89518	4.89491	0.879622	1012.51	465	330035
	1	10	29	10.6732	9.02213	0.877293	1344.53	464	1063360	5.41709
	1	10	30	6.71806	5.49453	0.865594	1026.78	493	373614
	1	10	31	10.6661	8.85276	0.848351	1298.68	461	958814	4.86973
	1	10	32	9.53821	8.12718	0.878754	934.342	501	439933	4.64451
	1	10	33	7.31763	6.05675	0.868806	1229.16	484	561031	3.50467
	1	10	36	6.04356	4.95289	0.863612	998.253	452	346243
	1	10	37	5.47366	4.58038	0.898485	1053.59	483	305262
	1	10	38	6.34022	5.29743	0.877058	939.38	476	309870	3.22235
	1	10	39	7.5714	6.20022	0.837527	1310.37	481	650462	4.10214
	1	10	40	8.81209	7.29553	0.857672	955.906	435	502359	4.52157
	1	10	41	7.06263	5.89951	0.880513	1146.3	475	499879	3.87052
	1	10	42	5.44313	4.34858	0.828654	1129.98	492	329611
	1	10	43	10.8271	9.09215	0.86356	1129.62	491	724999	5.95298
	1	10	44	6.6051	5.31734	0.851237	989.972	462	359738	3.34046
	1	10	45	1.93973	0.996353	0.626215	870.246	510	33583	1.62037
	1	10	46	7.91625	6.5023	0.868726	1077.37	614	305531
	1	10	47	9.78037	8.03338	0.859043	1133.35	475	680906	4.384
	1	10	48	6.97391	5.75544	0.870838	1251.82	458	596691
	1	10	49	8.46454	7.06044	0.868448	912.346	454	409233	3.51395
	1	10	51	5.71559	4.55941	0.853873	1066.78	458	346817
	1	10	52	5.22441	4.21308	0.845836	1132.77	461	356155
	1	10	53	5.95414	4.87299	0.874842	1035.24	465	343561
	1	10	54	10.2376	8.39907	0.841624	1282.97	465	894565	4.90365
	1	10	55	8.88066	7.46073	0.875547	1122.49	483	608249	3.63726
	1	10	56	11.2412	9.2951	0.842893	1228.07	472	843628
	1	10	57	6.41692	5.15065	0.839676	1262.39	490	551412	3.46477
	1	10	58	5.75788	4.68821	0.867902	948.961	453	293458	2.32797
	1	10	59	8.78625	7.36897	0.865989	1250.54	459	734416	4.61694
	1	10	60	5.48675	4.39572	0.870642	1311.16	476	450148
	1	10	61	5.80626	4.65147	0.856014	1235.02	478	428781	3.99139
	1	10	63	5.73663	4.82006	0.897615	1129.46	475	371555
	1	10	64	6.26346	5.17708	0.888407	907.302	457	283536	3.09289
	1	10	65	7.28696	6.04036	0.867678	1059.73	450	468190	3.75314
	1	10	66	6.02457	4.9259	0.869088	896.357	450	271133
	1	10	67	5.63641	4.62758	0.876725	927.581	454	272748	2.63123
	1	10	68	8.79813	7.28814	0.847735	1017.97	497	447481	5.06083
	1	10	69	8.10588	6.80826	0.875823	1135.76	454	598420	3.91842
	1	10	70	5.29532	4.28315	0.860888	915.301	449	245279
	1	10	71	9.66345	8.1331	0.881794	1211.54	453	779079	4.76668
	1	10	73	5.46334	4.46686	0.867648	1023.65	447	319114
	1	10	75	6.40989	5.3424	0.87776	947.251	452	348776	2.84108
	1	10	76	5.71461	4.69577	0.877997	872.343	443	253866	2.49964
	1	10	77	6.91888	5.67907	0.86104	916.517	437	332839
	1	10	122	6.19726	5.04433	0.873635	967.214	485	302031
	1	10	121	7.6429	6.27668	0.857853	1309.86	468	699891	3.49711
	1	11	1	9.6624	8.05309	0.862717	1154.4	464	721021	3.97341
	1	11	5	7.13331	5.76196	0.844441	1304.47	479	586722
	1	11	6	9.08721	7.57123	0.85462	1060.41	453	606619	4.54001
	1	11	7	6.01486	4.85331	0.853032	1453.03	498	560109	3.03599
	1	11	8	6.11835	5.01361	0.862433	1043.42	458	369738
	1	11	10	5.50922	4.5248	0.865465	890.783	455	251338	2.35815
	1	11	11	8.80755	7.33277	0.859481	1055.61	468	602909	3.69731
	1	11	12	7.42391	6.16637	0.859603	1067.38	461	475531
	1	11	13	7.57443	6.39902	0.887935	1056.49	455	485215	4.25076
	1	11	16	10.6134	8.82687	0.852847	1254.83	484	868594	6.42879
	1	11	18	6.2332	5.23723	0.88658	814.981	440	233922
	1	11	19	7.90978	6.62658	0.869805	869.078	471	332386	4.73776
	1	11	20	8.95051	7.64582	0.887733	1185.68	505	616885	4.4083
	1	11	21	5.67676	4.69373	0.879858	1139.26	469	385800	3.06988
	1	11	22	9.84953	8.16753	0.870576	998.867	445	579330
	1	11	23	7.3831	6.16192	0.877763	1378.6	468	703165	3.26924
	1	11	24	6.25755	5.09613	0.856148	1139.71	488	402114	3.03182
	1	11	25	7.87829	6.56109	0.874908	908.431	443	388012	4.18221
	1	11	26	7.56862	6.4105	0.884253	1294.51	482	620512
	1	11	27	7.26266	6.09797	0.887088	1151.46	505	466141	3.72294
	1	11	28	8.05255	6.65846	0.869239	1039.56	456	515807	4.18276
	1	11	29	6.26759	5.13734	0.867452	1111.66	456	416845
	1	11	32	9.18126	7.69041	0.873709	1131.28	453	684316	3.78243
	1	11	33	6.19471	5.0646	0.861026	1133.32	457	428066
	1	11	34	6.63733	5.47055	0.862928	1127.58	491	430902
	1	11	35	8.5534	7.1646	0.876689	1163.06	467	634872	4.68165
	1	11	36	8.27643	7.00531	0.888945	1405.39	501	773294	4.2809
	1	11	37	7.17314	5.94116	0.858191	1124.31	497	444562	3.67022
	1	11	38	8.19408	6.77126	0.865767	1315.17	461	756230	4.23206
	1	11	39	5.43252	4.48903	0.869721	935.187	459	263753
	1	11	40	9.37411	7.92412	0.875828	1170.37	482	674138
	1	11	41	9.24369	7.65082	0.858603	1405.03	531	814164	5.44806
	1	11	42	5.61477	4.49276	0.832798	1299.85	489	418975
	1	11	43	5.03938	4.15551	0.884523	1053.52	473	289556
	1	11	44	7.3821	6.26235	0.88967	1129.71	460	540871	4.57971
	1	11	46	7.82737	6.61663	0.876282	1176.34	460	625344	3.64379
	1	11	47	5.9585	4.91468	0.877386	870.695	457	248370
	1	11	48	6.05603	4.98842	0.869049	1062.09	462	386703
	1	11	49	7.56217	6.34328	0.877928	1102.1	461	502978	2.85715
	1	11	50	5.16067	4.23537	0.869682	866.375	461	202618
	1	11	51	5.65169	4.70175	0.892155	1040.97	459	332156
	1	11	52	5.77239	4.74468	0.869148	1036.72	459	359621	3.14821
	1	11	53	18.2934	15.3856	0.850294	1072.4	455	1240448	13.4184
	1	11	54	5.44531	4.20559	0.802615	977.302	461	271276
	1	11	55	6.81236	5.64339	0.881402	963.717	462	361584	2.93224
	1	11	57	11.3347	9.44842	0.851689	1152.2	484	793086	4.80287
	1	11	58	5.55412	4.60461	0.871993	1033.21	456	316217
	1	11	59	5.83691	4.8032	0.87133	1111.77	458	399416	2.90099
	1	11	60	6.05508	5.02001	0.879323	969.909	452	326028
	1	11	61	8.61962	7.12531	0.87202	1140.28	452	667908	4.32595
	1	11	62	9.74753	8.10621	0.864288	1126.86	446	722719	4.66136
	1	11	64	7.8872	6.44124	0.847923	1220.23	455	639526	2.98063
	1	11	65	6.64288	5.63191	0.901685	961.609	457	358131	4.84025
	1	11	66	9.70065	8.06228	0.850641	1173.44	455	732658	4.71511
	1	11	67	9.02558	7.56247	0.862213	1064.45	444	608016	3.73352
	1	11	68	8.55697	7.23552	0.875991	1308.95	489	733317	4.50581
	1	11	69	9.79912	8.09086	0.856741	1127.76	454	691375
	1	11	71	10.1757	8.51549	0.862665	1077.27	450	687590	5.53338
	1	11	72	5.81197	4.76195	0.882426	1114.25	454	400618
	1	11	73	7.30643	6.14354	0.885586	961.53	456	388500	1.88162
	1	11	74	6.79406	5.63124	0.877266	1225.41	468	526355
	1	11	75	9.17859	7.67573	0.864111	1884.73	456	1460199	4.17037
	1	11	76	9.61408	7.9059	0.847863	1228.29	445	807212	5.21374
	1	11	77	10.0036	8.43224	0.862856	823.963	472	349149	5.42552
	1	11	78	6.60955	5.49203	0.879788	914.159	455	319733	0.891403
	1	11	79	8.6165	7.23952	0.884625	1022.89	446	533781	3.96657
	1	11	80	5.47474	4.31804	0.839696	1145.34	462	394834
	1	11	81	7.59106	6.20126	0.852876	1201.51	494	521309	4.55742
	1	11	82	5.33405	4.35601	0.87257	1065.95	454	326050
	1	11	83	7.02488	5.7735	0.855309	1214.7	445	578578	2.99008
	1	11	84	7.87064	6.50005	0.853779	1073.94	437	529512	3.94275
	1	11	85	7.41855	6.208	0.88779	854.346	425	330678	3.80379
	1	11	86	5.15086	4.18939	0.861882	987.566	437	286347	1.82775
	1	11	87	7.76804	6.48234	0.878427	914.678	433	408690	4.2406
	1	11	88	10.3763	8.60816	0.852682	921.048	420	573426	6.06913
	1	11	89	5.87678	4.82344	0.856456	758.417	431	193165
	1	11	90	10.1936	8.55756	0.867859	1076.16	440	709625	4.67196
	1	12	1	9.12976	7.60788	0.866252	1205.49	443	744693	4.34193
	1	12	2	7.45402	6.31945	0.882007	927.277	492	327928
	1	12	3	3.51447	2.90249	0.900661	1163.67	504	223948
	1	12	4	8.00985	6.72606	0.873798	860.395	457	373449	3.64017
	1	12	5	8.32094	6.82536	0.866789	1217.72	450	679734	4.43778
	1	12	6	8.11638	6.83003	0.877757	925.179	465	416142	3.42379
	1	12	7	5.48567	4.59239	0.889989	948.286	473	267591
	1	12	8	6.1063	5.12069	0.888276	1010.2	452	344475	3.65394
	1	12	11	8.75557	7.50245	0.900573	1273.53	473	747240	3.7447
	1	12	13	4.78936	3.93454	0.877696	960.111	456	240281
	1	12	14	6.2168	5.11053	0.879298	985.213	472	313155	3.51776
	1	12	15	5.7101	4.59156	0.861727	919.345	452	266588
	1	12	16	8.57133	7.33053	0.898196	1195.27	464	657627	3.66408
	1	12	17	10.5558	8.92977	0.878079	1001.08	456	607310	4.76558
	1	12	18	5.69567	4.92946	0.913908	1088.29	502	327041
	1	12	19	10.8125	9.13665	0.869624	1416.1	486	1050876	5.49958
	1	12	20	10.0501	8.41717	0.870295	1238.32	457	838048	4.89971
	1	12	21	6.85982	5.66043	0.862419	922.151	496	296060	3.19746
	1	12	22	7.11682	5.9364	0.873726	1149.34	483	486282	3.41421
	1	12	23	5.75478	4.73664	0.88607	1145	473	381290
	1	12	24	5.34439	4.43696	0.872603	778.44	459	176320
	1	12	26	7.36569	6.15115	0.880169	1187.26	500	508666	2.88354
	1	12	27	6.27096	5.09993	0.857366	1062.63	461	381140
	1	12	28	9.46456	8.03946	0.88395	1164.99	460	718306	4.96019
	1	12	29	5.3169	4.38332	0.89536	1082.83	467	327127	3.78954
	1	12	30	6.61029	5.45704	0.87511	916.363	452	315768	3.66034
	1	12	31	7.08296	5.90203	0.878419	1437.14	468	714898	3.40487
	1	12	33	7.61067	6.33059	0.864234	1334.81	465	705881	3.90514
	1	12	34	6.8351	5.74065	0.88932	1183.95	500	476380	3.4756
	1	12	35	7.559	6.33134	0.885644	1126.56	469	540720	3.64874
	1	12	36	8.39466	6.92329	0.847629	1184.16	473	642595	4.57752
	1	12	37	7.66283	6.3007	0.859767	1204.26	450	636543	3.51871
	1	12	38	5.18483	4.25735	0.872103	1012.96	471	289780
	1	12	39	6.09891	5.00667	0.873006	901.184	445	281710	2.84029
	1	12	40	7.72296	6.41387	0.875842	999.837	451	462450	4.10191
	1	12	41	8.72646	7.34247	0.884104	1440.29	470	938044	5.33007
	1	12	42	8.42072	7.1003	0.888898	1409.25	471	867888	3.92319
	1	12	44	6.93043	5.79259	0.891112	1275.71	488	554309	3.00261
	1	12	45	8.55934	6.92493	0.831589	1128.34	477	573144	4.9399
	1	12	46	5.53151	4.50324	0.87591	1105.18	477	341590
	1	12	47	5.6174	4.52969	0.856235	1055.15	481	315692
	1	12	48	6.14754	5.0407	0.874454	1270.25	459	525593	2.64898
	1	12	49	6.21061	5.12681	0.864348	875.379	450	267699
	1	12	50	9.46271	7.93364	0.873316	1067.72	466	592546	4.69391
	1	12	52	8.4269	6.94137	0.861335	986.479	459	483025	4.20164
	1	12	53	6.92058	5.60041	0.850353	1159.18	462	520008	3.34854
	1	12	54	5.94396	4.79823	0.852628	1300.62	465	510796	2.9348
	1	12	56	5.74865	4.67333	0.850059	1052.6	459	364442	3.68008
	1	12	57	8.59416	6.98537	0.832594	1199.47	600	447040
	1	12	58	6.52325	5.41337	0.878591	1378.83	466	615136
	1	12	59	3.9273	3.09251	0.850914	1115.07	923	47694	1.91692
	1	12	60	5.55585	4.51588	0.854003	1232.27	461	446636	3.60246
	1	12	61	6.86141	5.64935	0.867747	1150.52	450	520774	2.99361
	1	12	62	8.95836	7.49432	0.871186	1272.66	465	802009	3.60292
	1	12	63	6.19249	5.10637	0.866383	925.464	450	303585
	1	12	64	6.47437	5.21176	0.846455	1295.27	534	524973
	1	12	65	5.67087	4.59667	0.836827	1410.29	549	501882
	1	12	67	11.5418	9.39827	0.820736	1323.93	513	991115	6.07602
	1	12	69	9.14454	7.60141	0.860768	1361.47	617	585075
	1	12	71	5.33087	4.21218	0.8328	1241.26	496	368413
	1	12	72	8.59062	7.23053	0.874263	1039.94	449	554450	4.30126
	1	12	73	8.12886	6.59542	0.834533	1330.33	492	695389	3.6107
	1	12	74	10.6561	8.83762	0.865113	1378.82	468	1073853	5.29085
	1	12	77	7.86075	6.27487	0.845699	1297.7	619	475514	4.00721
	1	12	78	8.15214	6.72649	0.862253	900.75	458	369332	3.91627
	1	12	79	9.12955	7.69732	0.871811	1146.87	462	654125	4.43152
	1	12	80	4.5027	3.66988	0.888119	1022.13	465	243097
	1	12	81	6.57556	5.31052	0.848852	1165.8	459	469495
	1	12	82	7.28976	6.08439	0.873356	1077.6	458	478589	3.74409
	1	12	83	5.29161	4.35315	0.872823	881.52	445	229902
	1	12	84	9.10931	7.591	0.869651	1133.45	455	666348	4.55067
	1	12	85	6.15473	5.01392	0.856544	1087.12	463	385623	3.01617
	1	12	86	6.89558	5.71681	0.861591	1164.5	450	519908	3.45425
	1	12	87	9.65003	8.17424	0.8793	1061.62	447	666974	4.18541
	1	12	88	14.9707	12.9083	0.876606	1120.98	446	1155364	11.4292
	1	12	89	9.09687	7.42957	0.843668	1172.79	453	712693	4.18567
	1	12	90	5.68615	4.53278	0.837771	978.946	466	315404	3.19716
	1	12	92	8.27544	6.84321	0.862106	953.307	440	455071	3.73674
	1	12	93	7.17258	5.8828	0.860213	961.086	474	370275	4.01333
	1	12	94	7.68246	6.52573	0.892369	964.754	465	393709	3.71125
	1	12	95	8.11729	6.80465	0.872246	1142.1	442	602302	3.80098
	1	12	96	6.0285	4.9823	0.878171	854.751	441	260986	3.29336
	1	12	97	6.07527	5.04966	0.875008	987.086	442	341482	2.65506
	1	12	98	9.34242	7.90981	0.867682	827.26	436	376534	4.93223
	1	12	99	5.86998	4.94553	0.896374	871.324	435	253748
	1	12	100	6.6082	5.53748	0.894385	1067	472	382802
	1	13	1	8.24844	7.04416	0.880001	1005.86	487	422538	3.86847
	1	13	4	6.04774	4.99436	0.880798	1128.4	458	401585	3.12064
	1	13	5	6.97542	5.86982	0.87726	1083.75	446	477958	3.38566
	1	13	8	8.49037	6.9743	0.854779	1346.98	462	808553	4.19401
	1	13	9	5.44496	4.51958	0.87846	871.247	477	206217
	1	13	10	5.49712	4.46807	0.855966	1132.01	467	368039
	1	13	11	5.59301	4.59177	0.870691	874.177	463	227455
	1	13	12	5.35621	4.4067	0.86282	1181.18	471	378746
	1	13	13	5.91369	4.91916	0.877343	1258.95	450	494613	2.88288
	1	13	14	5.36377	4.3874	0.867682	1199.88	459	394931	2.34979
	1	13	15	8.36398	7.01162	0.872868	1020.21	449	517407	5.07191
	1	13	17	4.98108	3.99027	0.862564	867.204	466	199952
	1	13	18	5.22685	4.41304	0.905843	1028.52	461	301630	3.10932
	1	13	19	6.43122	5.29918	0.863768	1140.62	450	462348	2.9929
	1	13	20	7.09907	5.79013	0.841713	1034.64	485	389666
	1	13	21	5.92599	4.88305	0.880153	1319.69	470	515095	3.46802
	1	13	23	6.0924	5.02064	0.874944	1028.45	459	367840	3.25596
	1	13	24	7.05025	5.89938	0.874331	1185.17	460	544797	4.2815
	1	13	25	4.94286	4.14517	0.897107	1099.92	457	344196	1.72055
	1	13	26	6.72026	5.57283	0.864129	1111.83	454	463900
	1	13	27	8.58704	7.24472	0.876452	1342	469	784860	4.29964
	1	13	28	6.73882	5.63946	0.885579	1168.18	477	485671	3.02441
	1	13	29	6.49165	5.39821	0.874472	1041.53	453	400820
	1	13	30	7.2852	5.99302	0.860575	989.422	464	405318	3.97772
	1	13	31	7.48163	6.26428	0.874953	1223.59	462	595501	3.95727
	1	13	32	7.22086	5.95832	0.86869	1055.34	454	490197	3.2195
	1	13	33	7.12647	5.80595	0.850975	1274.48	459	603679	3.40996
	1	13	34	9.76111	8.18229	0.862877	1349.64	474	922484	5.05409
	1	13	35	5.92304	4.93233	0.888407	1118.53	467	382940
	1	13	36	5.14872	4.07785	0.83839	1444.33	471	572828	0.566236
	1	13	37	6.99643	5.63247	0.860979	1164.35	470	511352	2.8632
	1	13	38	6.78494	5.48607	0.852125	1154.63	471	443838
	1	13	40	7.85343	6.33861	0.839538	1295.36	454	721978	3.73102
	1	13	41	7.29996	6.10565	0.876164	825.301	449	293257
	1	13	42	5.68687	4.67082	0.879672	1021.88	468	309074
	1	13	43	7.83863	6.35252	0.822681	1130.49	489	483879	4.26176
	1	13	44	9.26151	7.79618	0.875747	1296.42	476	816262	3.8312
	1	13	45	6.22062	5.14499	0.868708	812.257	439	251324	3.28418
	1	13	47	7.84127	6.50454	0.857897	926.817	450	396419	3.97399
	1	13	49	5.96726	5.0039	0.89385	971.587	446	332138	2.66357
	1	13	50	7.63506	6.44454	0.891712	1197.52	470	590109	3.66564
	1	13	51	9.58675	8.0873	0.875331	1166.33	496	667074	4.618
	1	13	52	10.1133	8.35094	0.858287	1265.43	448	865232	5.64104
	1	13	53	8.13527	6.68818	0.863808	1220.2	476	633395	3.80198
	1	13	54	7.16802	5.90146	0.889644	1176.99	469	506193	3.3535
	1	13	55	6.36231	5.1802	0.850241	972.35	450	335929	3.0097
	1	13	56	5.85702	4.80217	0.864188	971.726	448	310502
	1	13	57	7.4922	6.25579	0.882008	1036.53	480	421643
	1	13	59	4.97208	4.13571	0.875857	901.865	449	227496
	1	13	60	5.30795	4.31618	0.864958	981.955	455	282167
	1	13	61	5.80502	4.73337	0.859864	1144.18	453	411491	2.85704
	1	13	62	7.60554	6.21821	0.858831	1288.06	454	652428
	1	13	63	7.00728	5.78506	0.867414	1050.27	453	416310
	1	13	64	5.94796	4.86297	0.864292	877.351	442	262396
	1	13	65	8.09398	6.8741	0.878861	1174.26	454	613963	4.531
	1	13	66	13.9716	11.6388	0.861011	1169	439	1099305	9.94148
	1	13	67	7.22568	5.95771	0.843888	1185.07	467	550973	3.16759
	1	13	68	9.73369	8.17949	0.878125	1185.16	446	776768	4.49465
	1	13	69	6.6437	5.39968	0.8491	1188.54	465	493716
	1	13	70	5.63227	4.4973	0.849062	1148.95	501	379941
	1	13	71	7.95493	6.64819	0.880852	939.833	454	406218	3.9912
	1	13	72	5.63322	4.60611	0.860816	1133.76	486	370537
	1	13	73	5.4061	4.48142	0.890769	904.594	443	249072
	1	13	75	6.53222	5.48722	0.892572	1091.31	459	426283	3.16923
	1	13	76	4.2083	3.37774	0.86306	890.162	454	173975
	1	13	77	6.61835	5.47289	0.864186	908.769	422	325796	3.02914
	1	13	80	5.47652	4.52419	0.870941	890.066	439	259984	3.32939
	1	13	81	12.0825	10.3164	0.881789	995.039	432	722323	6.1845
	1	13	82	8.56256	7.24378	0.886511	607.891	421	166366	4.19359
	1	13	83	6.51897	5.21466	0.845672	1170.74	450	513496	1.95783
	1	13	85	6.12291	4.9121	0.815582	1289.96	658	325391
	1	13	126	4.09881	3.29508	0.864578	1016.05	455	227575
	1	13	125	1.02382	0.580259	0.709109	881.396	508	24423
	1	14	1	7.17622	5.90721	0.860249	1117.51	436	533502	3.03952
	1	14	2	5.54189	4.56016	0.877505	1040.67	447	331575	2.65072
	1	14	3	5.4662	4.5341	0.876153	935.477	456	275744	2.96346
	1	14	4	5.69488	4.77025	0.893583	1026.35	506	309081	3.09028
	1	14	5	5.63012	4.71819	0.895814	1309.88	482	477234
	1	14	6	8.505	7.18104	0.871805	1056.54	454	580563	3.27197
	1	14	7	7.08233	5.96059	0.878127	1001.88	467	420211	4.01842
	1	14	9	6.34922	5.35654	0.885147	929.139	455	317875	3.30831
	1	14	10	7.51989	6.25608	0.87397	1127.26	454	543947	3.56166
	1	14	12	7.77861	6.6389	0.896422	1052.34	484	448125	4.05643
	1	14	13	7.4646	6.26098	0.878657	934.371	484	330543
	1	14	14	6.16415	5.10102	0.875275	932.901	450	298414	2.8108
	1	14	15	4.72523	3.88936	0.88259	919.517	435	223918
	1	14	16	7.33409	5.90725	0.836901	1130.21	510	451673
	1	14	17	7.54911	6.20853	0.855916	1133.49	465	507478	4.18337
	1	14	18	5.29613	4.3222	0.867529	828.518	480	182562	3.70223
	1	14	19	6.22519	5.13428	0.872898	1336.55	467	562124
	1	14	22	6.22265	5.04322	0.853948	1108.9	455	414296
	1	14	24	4.46291	3.67279	0.892042	1021.6	471	243098
	1	14	25	7.95244	6.66541	0.869778	989.016	464	455358
	1	14	26	6.36764	5.37151	0.897268	1102.23	475	427793	3.26876
	1	14	27	7.73887	6.41836	0.863902	1174.95	452	604308	3.16828
	1	14	28	9.21152	7.83017	0.882016	1027.39	457	581940	4.49266
	1	14	29	7.9968	6.6476	0.873556	1201.09	456	625713	3.84076
	1	14	30	7.77638	6.46014	0.86667	1397.66	457	776489	3.45853
	1	14	31	9.10299	7.55026	0.864811	1031.87	435	592353	4.37589
	1	14	32	9.62062	8.18655	0.887266	1106.19	485	650548	4.96108
	1	14	33	8.16598	6.90676	0.889378	1174.39	472	614920	4.27754
	1	14	34	7.6734	6.44599	0.882622	1305.51	481	671620	4.01371
	1	14	35	7.6797	6.34581	0.860628	1245.31	451	687680	3.97138
	1	14	36	7.17331	6.02907	0.880545	1060	486	414488	3.18192
	1	14	37	6.07985	5.03656	0.870014	1219.74	462	481119	3.23988
	1	14	38	6.4949	5.35533	0.868472	1028.07	452	395751	3.55352
	1	14	39	8.49335	6.99413	0.853251	1156.89	451	646821	4.08011
	1	14	40	9.01021	7.43041	0.852524	1107.24	452	618568	4.52747
	1	14	41	6.79753	5.55313	0.864157	1138.02	454	483168	2.75762
	1	14	42	10.5797	8.81275	0.860628	1214.29	440	926735	5.41061
	1	14	43	8.33131	7.06501	0.886887	1204.1	461	691515	3.68005
	1	14	44	6.22417	5.05675	0.848782	941.443	449	325091	3.16121
	1	14	45	7.37503	6.20539	0.8886	956.856	482	372494	3.50732
	1	14	46	8.2374	6.9587	0.883896	1142.15	476	578750	3.83385
	1	14	47	6.11016	5.04831	0.872813	1102.56	458	399160	3.54848
	1	14	48	5.23546	4.22339	0.85908	1107.32	455	334585
	1	14	50	5.86646	4.70119	0.847852	999.219	449	318702
	1	14	51	5.86887	4.8503	0.872935	1059.23	461	353350
	1	14	52	4.67071	3.81977	0.885756	1186.05	465	342343
	1	14	54	8.41984	6.8696	0.847932	1175.41	511	551724	4.40213
	1	14	55	7.92554	6.51696	0.852186	970.693	442	449972	3.8851
	1	14	56	5.28017	4.30911	0.865955	999.988	458	303765	3.62417
	1	14	57	5.39284	4.44632	0.880004	1001.48	448	309244
	1	14	58	5.42462	4.49898	0.884158	1178.97	459	398597
	1	14	59	6.00945	4.90483	0.869321	1104.19	472	393203
	1	14	60	6.47463	5.23994	0.859277	1208.54	461	504753	3.23201
	1	14	61	6.78256	5.74414	0.897653	887.475	444	321773	3.66858
	1	14	62	5.74324	4.74884	0.890622	891.423	441	270253
	1	14	63	5.81041	4.62075	0.848772	1091.22	467	392464	1.82301
	1	14	65	6.84763	5.6249	0.868252	1060.31	461	415008	3.86177
	1	14	66	4.82892	4.01639	0.887735	773.904	439	166749	2.49379
	1	14	67	6.13254	5.02014	0.848444	1101.24	454	405219
	1	14	68	8.86603	7.35712	0.870708	1054.91	486	541810	5.05782
	1	14	69	11.0818	9.23606	0.840123	1233.82	453	959121	5.84022
	1	14	70	7.31239	5.88925	0.838289	1012.45	455	408437	3.16305
	1	14	71	6.21188	5.0707	0.857826	1001.22	464	340018	3.01326
	1	14	72	5.97645	4.78836	0.826236	917.868	450	270633
	1	14	73	10.388	8.75069	0.86583	1284.8	447	939575	5.12288
	1	14	74	7.1057	5.78876	0.861921	1078.27	441	485155	3.3456
	1	14	75	5.43344	4.47098	0.871613	795.966	435	200121
	1	14	76	7.23893	6.16037	0.899834	984.924	433	449311	3.48435
	1	14	77	5.35526	4.42207	0.877039	1040.19	451	333417	2.60456
	1	14	78	8.30761	6.98996	0.884435	1256.27	462	703931	3.74438
	1	14	79	6.55599	5.29788	0.856047	1095.74	460	429958	3.24562
	1	14	83	6.11648	4.85848	0.834873	1045.93	460	338035
	1	14	84	8.06166	6.56435	0.847619	1134.13	441	585259	3.07562
	1	14	85	6.40181	5.17243	0.857256	1088.22	446	449539
	1	14	86	5.42362	4.52826	0.908753	888.357	432	256428
	1	14	87	7.65186	6.32115	0.859219	976.008	438	446989	3.48816
	1	14	88	5.0961	4.28534	0.913923	985.807	461	273155
	1	14	89	7.39422	6.07661	0.877212	835.695	435	313573	3.95574
	1	14	90	5.63124	4.64076	0.870928	1021.7	449	325940
	1	14	91	10.8594	9.14893	0.863937	1135.99	469	757447
	1	14	92	5.95183	4.74526	0.85893	1000.63	455	329885	3.08284
	1	14	93	7.98701	6.76486	0.890992	938.686	439	433085	4.33495
	1	14	94	4.69029	3.81082	0.862694	996.49	440	266554
	1	14	95	10.8141	9.13082	0.866394	972.141	435	645717	5.57121
	1	14	96	5.66151	4.66272	0.872267	800.597	434	209845
	1	14	97	8.33422	6.83949	0.859978	789.929	420	323096	3.81227
	1	14	98	6.71064	5.64986	0.893856	912.063	435	336319	2.73928
	1	14	127	4.3694	3.37279	0.818995	1236.99	611	256562
	1	15	1	10.5429	8.78495	0.847052	1169.98	433	850955	5.94407
	1	15	2	6.97477	5.8148	0.874374	1193.87	447	546291	3.40424
	1	15	3	5.43797	4.44263	0.867737	1170.87	449	389743
	1	15	5	9.14435	7.75538	0.885988	1195.07	457	705803	4.16119
	1	15	6	7.12627	5.75616	0.83463	1319.92	488	623670	3.16481
	1	15	7	8.05755	6.66846	0.847305	1421.65	470	775125	4.38954
	1	15	8	6.91137	5.74422	0.862281	1000.83	441	402388	3.53335
	1	15	9	6.03713	4.94059	0.874523	880.979	433	276762	1.9111
	1	15	10	8.80715	7.42245	0.869634	1492.44	452	994675	4.01598
	1	15	12	7.30667	6.08779	0.878197	1164.99	430	580928	4.03771
	1	15	13	6.61075	5.56269	0.872799	818.11	445	284116	2.99157
	1	15	14	5.68612	4.7301	0.882092	986.45	441	307960
	1	15	15	4.95953	4.11084	0.884887	1036.2	479	281112
	1	15	16	7.83818	6.49679	0.861671	1075.87	461	494269	3.97332
	1	15	18	6.61515	5.50851	0.873158	1003.7	471	386311
	1	15	19	9.11236	7.76022	0.886823	1142.12	479	619051	4.41011
	1	15	20	7.77976	6.52814	0.866669	1057.32	447	518944	3.80499
	1	15	21	7.83049	6.46841	0.863968	1264.43	443	682914	3.95631
	1	15	22	6.59927	5.43795	0.867293	1034.05	447	398030
	1	15	23	6.25954	5.27771	0.890045	1140.62	465	425510
	1	15	24	5.71562	4.68308	0.875267	966.332	429	310370
	1	15	25	5.61888	4.61895	0.883134	1063.5	458	333047
	1	15	26	6.72209	5.68916	0.889207	973.613	449	365464	3.72947
	1	15	27	6.49897	5.28668	0.844173	1185.77	476	465801	3.77773
	1	15	28	9.26499	7.85822	0.874204	1166.51	450	767252	4.76168
	1	15	30	4.92048	3.99816	0.861971	1117.24	457	313107
	1	15	31	8.26914	6.97748	0.882545	1079.43	440	571041	4.14625
	1	15	32	6.32735	5.26251	0.877544	1049.75	446	389797	3.54489
	1	15	33	5.31287	4.37547	0.88856	884.197	461	229999	2.85145
	1	15	36	5.90336	4.92099	0.882717	1033.58	434	374882	2.61951
	1	15	37	6.00872	4.96434	0.875044	1093.76	442	402166
	1	15	38	8.40563	7.16394	0.884645	1198.98	474	655357	4.67112
	1	15	39	7.05524	5.81789	0.86609	1034.3	447	438682	3.16182
	1	15	42	7.85118	6.35685	0.846592	1368.77	492	682994	4.20616
	1	15	44	7.29233	6.04688	0.865516	1204.03	453	561110	3.53251
	1	15	45	6.20084	5.10233	0.872433	1136.59	474	425717	2.84805
	1	15	46	7.77321	6.47034	0.871677	1143.64	474	552346	3.58013
	1	15	48	7.81001	6.66946	0.888851	928.99	464	374543	4.46614
	1	15	49	14.623	12.675	0.891588	1427.43	482	1495648	8.39758
	1	15	50	7.29589	5.89134	0.841774	1238.38	454	583753
	1	15	51	5.03692	4.09754	0.871176	1123.77	459	345893
	1	15	52	5.53233	4.65488	0.890537	1124.82	459	389626	2.56665
	1	15	53	5.99465	4.84746	0.865542	1241.57	504	421995
	1	15	54	6.5741	5.5048	0.879013	1090.83	460	440579	3.30223
	1	15	55	10.9859	9.07379	0.83908	947.078	422	606410
	1	15	56	8.43299	7.00986	0.87295	1497.42	452	922410	4.29419
	1	15	57	8.53657	7.17606	0.874628	1403.36	465	838753	4.10975
	1	15	58	8.04017	6.75936	0.877416	1488.85	461	872767	3.93346
	1	15	59	7.30805	6.1761	0.877858	1164.87	448	593121	3.9527
	1	15	60	8.22616	6.73219	0.848463	1361.28	454	788600	3.73997
	1	15	61	4.53291	3.74396	0.88175	903.635	437	215072
	1	15	62	5.41368	4.44849	0.880944	919.714	451	252412
	1	15	63	8.13281	6.74017	0.869829	1420.22	470	795554	4.40499
	1	15	64	6.33752	5.31956	0.886675	1132.44	452	452918
	1	15	65	4.97408	3.94451	0.84794	1061.48	478	270770	1.22793
	1	15	66	9.59278	8.09419	0.871506	880.987	425	477414	4.66011
	1	15	67	5.03326	4.1049	0.874321	1011.94	450	277999	2.61205
	1	15	68	7.75979	6.34829	0.850868	1104.63	444	529650	3.8187
	1	15	69	5.41813	4.47994	0.891812	812.028	471	187814
	1	15	70	8.50985	6.93228	0.849302	863.58	446	355730	3.50495
	1	15	71	5.00002	3.9768	0.84523	1113.82	472	334037
	1	15	72	6.0772	4.83464	0.834676	1024.53	481	316328
	1	15	73	5.1614	4.33144	0.897108	1005.78	465	278914
	1	15	74	6.41004	5.26682	0.866403	936.504	429	350799	2.959
	1	15	75	7.18397	5.91611	0.865704	1087.64	439	480068	3.16225
	1	15	76	6.14012	5.06594	0.882055	792.454	426	222640
	1	15	77	6.04637	4.96073	0.860537	858.958	439	260876
	1	15	78	6.5883	5.4538	0.866561	1017.16	456	393349	3.21471
	1	15	79	7.7542	6.43732	0.861411	1252.9	448	645861	3.83703
	1	15	80	6.95202	5.64328	0.850453	1061.24	456	431993
	1	15	82	6.54828	5.29488	0.851556	1030.48	448	379772
	1	15	83	6.98719	5.71359	0.85406	1145.24	454	480339
	1	15	84	7.11313	5.85144	0.862458	933.081	437	368466	3.75928
	1	15	86	6.77509	5.59403	0.871348	974.596	423	381325
	1	15	88	6.53166	5.45602	0.880027	931.807	457	320284	3.55887
	1	15	89	5.69059	4.66103	0.866627	904.683	458	238760
	1	15	91	6.46163	5.42606	0.886887	960.04	440	361868	3.62439
	1	15	93	7.73176	6.46756	0.850292	975.525	431	478063	3.3074
	1	15	95	6.3863	5.2387	0.859388	915.378	440	302872	3.18902
	1	15	96	5.39419	4.42222	0.882745	789.131	429	193523
	1	15	97	5.29852	4.32274	0.875584	1029.49	431	314883
	1	15	98	4.77585	3.92112	0.883661	1072.76	457	276563
	1	15	130	4.38176	3.49029	0.86277	1161.95	499	254076
	1	15	129	1.86768	1.28992	0.829515	1166.07	915	7834
	1	16	1	13.9434	11.7052	0.853846	934.565	432	799686	5.99107
	1	16	2	7.10661	5.86816	0.859287	1170.54	448	542129
	1	16	3	5.69438	4.71961	0.877932	850.859	441	235563
	1	16	5	6.82925	5.49601	0.838578	1115.03	468	470206	3.24361
	1	16	6	4.3609	3.58297	0.891314	910.217	445	207766
	1	16	7	6.92207	5.6069	0.838878	1177.36	461	452470
	1	16	8	8.79681	7.46972	0.877402	991.372	441	546780	4.6361
	1	16	9	6.11422	4.7425	0.778077	1092	441	303430
	1	16	10	6.74836	5.59502	0.870161	870.09	439	304098
	1	16	11	6.38955	5.28694	0.860349	909.966	499	282456	3.02959
	1	16	13	9.45616	7.95291	0.868699	1096.02	418	696190	4.50873
	1	16	16	5.56616	4.60941	0.877211	1008.07	452	304947	3.1143
	1	16	17	13.9886	11.8966	0.871216	891.785	433	709900	3.80691
	1	16	18	6.86541	5.65432	0.864223	1262.86	450	570967	2.98336
	1	16	19	7.65011	6.44729	0.894485	952.209	427	432862	3.46791
	1	16	20	6.4699	5.40179	0.879314	1185.9	478	453730	3.11911
	1	16	21	9.77747	8.09513	0.850973	1139.18	453	715960	4.10954
	1	16	22	6.68246	5.50558	0.861839	1218.41	449	516708
	1	16	23	5.50315	4.43608	0.862268	1090.26	446	352458	3.00869
	1	16	24	5.71095	4.78648	0.901087	1031.96	449	344924
	1	16	25	6.05928	4.96589	0.861707	972.221	454	315335
	1	16	26	6.38625	5.29413	0.868391	902.524	452	319856	3.82991
	1	16	27	6.19724	5.18374	0.88218	860.596	436	267804	2.92725
	1	16	28	5.57504	4.63809	0.874389	874.14	452	248804
	1	16	29	6.4479	5.36568	0.877966	1024.78	449	383817	3.63069
	1	16	30	6.46191	5.30608	0.873968	1365.95	460	608890
	1	16	31	5.56141	4.55496	0.870423	887.751	434	256099
	1	16	32	5.32723	4.54734	0.925631	1198.78	459	419526	2.83066
	1	16	33	9.02192	7.4571	0.854583	1180.15	447	687529	5.18246
	1	16	34	8.72956	7.14776	0.85328	1397.46	489	869755	4.17191
	1	16	35	12.2408	10.3607	0.862761	1625.36	449	1500707
	1	16	36	6.27113	5.05685	0.84109	1177.32	473	436231	2.85371
	1	16	38	10.0849	8.39926	0.867573	1187.11	467	809182	4.8078
	1	16	39	7.6952	6.37374	0.872145	1156.56	450	600182	3.99705
	1	16	40	8.34353	6.82986	0.864915	1350.44	439	837598	3.89481
	1	16	41	9.16514	7.6896	0.874229	1415.1	459	945578	4.37587
	1	16	42	6.95545	5.70436	0.856275	1088.84	447	463587	3.60091
	1	16	43	7.7716	6.45834	0.874749	1348.15	466	734063	4.51044
	1	16	44	5.75802	4.75852	0.865253	1092.57	449	373036
	1	16	45	6.15772	5.21096	0.901126	1078.08	474	366411	3.08197
	1	16	46	8.30618	6.96745	0.876704	1212.36	462	649805	4.03428
	1	16	47	9.65143	8.05577	0.874405	1016.45	432	616493	4.39017
	1	16	48	5.95249	4.88884	0.861019	907.412	428	294194
	1	16	49	7.2007	6.05761	0.893076	1033.81	456	447664	4.21001
	1	16	50	6.79792	5.64107	0.881987	1250.11	454	568440	3.84492
	1	16	51	7.6467	6.37676	0.879298	1351.63	451	732017	3.78009
	1	16	53	7.65009	6.45889	0.880218	1531.77	463	894188	2.90504
	1	16	54	8.80699	7.23466	0.856807	1311.73	488	727316
	1	16	55	6.39167	5.22929	0.854796	1118.8	441	457656	3.21829
	1	16	57	6.0707	5.01567	0.873802	990.873	449	340898	3.17459
	1	16	58	7.25652	5.93753	0.864783	1036.78	440	440093	3.95801
	1	16	59	8.45492	7.07765	0.877762	930.967	444	445717	3.93901
	1	16	60	8.51171	7.22978	0.892939	1145.38	467	609515	4.97243
	1	16	61	9.89377	8.21464	0.852324	1084.73	437	668869	5.13105
	1	16	62	5.65069	4.53846	0.847736	987.242	437	307338	3.34308
	1	16	63	9.30399	7.49334	0.844842	1380.38	491	909722	5.09369
	1	16	64	7.14386	5.9477	0.878163	967.525	458	370881	3.30548
	1	16	65	7.21203	5.96344	0.866144	852.122	425	325323
	1	16	67	7.37695	6.08717	0.862684	1147.87	454	508589
	1	16	70	6.84707	5.61505	0.864277	1064.25	465	431313	4.0349
	1	16	71	5.62502	4.39618	0.826209	1484.25	531	541631
	1	16	72	5.81436	4.8227	0.885935	906.636	439	280128
	1	16	73	5.09355	4.05047	0.859558	1105.48	475	300361
	1	16	74	6.99703	5.71132	0.844435	1171.58	468	479641	3.38264
	1	16	76	5.40131	4.17747	0.818968	1215.03	500	391846	2.2427
	1	16	77	8.85345	7.22681	0.860929	1124.01	437	620519	4.89799
	1	16	78	6.58987	5.559	0.889799	1088.02	444	453265	3.81201
	1	16	80	6.16896	5.0922	0.865509	837.996	430	247102
	1	16	81	8.41986	6.90054	0.83199	1248.99	449	737541	3.13412
	1	16	82	6.14211	5.0231	0.868856	1077	461	382426
	1	16	83	6.0205	4.77127	0.836312	876.325	449	248198
	1	16	84	7.31121	6.07609	0.875731	973.122	454	390920	3.52118
	1	16	85	7.13855	5.96041	0.875207	958.397	451	367638	3.69343
	1	16	86	7.17978	5.945	0.877731	1267.84	457	589174	3.64473
	1	16	87	5.89471	4.88166	0.888799	947.688	459	292158	2.94464
	1	16	89	8.52528	6.97346	0.839533	1381.84	449	865994	4.27685
	1	16	90	5.36875	4.30063	0.858835	1273.82	463	467302
	1	16	91	7.7149	6.31973	0.852168	1244.17	446	616669	4.09268
	1	16	92	6.49885	5.34931	0.863821	956.481	426	355973	3.17278
	1	16	93	5.79672	4.86233	0.89525	828.105	436	241700	3.20153
	1	16	94	7.43818	6.00641	0.842278	1182.2	436	593298	4.25199
	1	16	95	9.55416	7.86095	0.845396	1288.53	492	771620	5.22687
	1	16	96	6.94746	5.70885	0.859606	1057.24	433	428056
	1	16	97	7.09222	5.83774	0.845515	1102.55	445	465184	4.47212
	1	16	98	5.5619	4.544	0.867056	908.193	428	255671
	1	16	99	9.11794	7.50157	0.849311	1155.77	429	721027	3.80213
	1	16	100	6.2958	5.1535	0.873758	892.552	427	291814
	1	16	102	6.88374	5.83392	0.890597	1131.88	442	496293	3.21802
	1	16	103	7.73569	6.36916	0.866669	1018.4	418	492363	4.26211
	1	16	104	7.25901	6.14292	0.894618	908.64	431	387950	3.48304
	1	16	105	9.58852	8.11863	0.870154	984.774	430	566938	3.97845
	1	16	132	5.22802	4.24168	0.858233	2357.77	573	964064
	1	16	131	3.70219	2.84867	0.863988	2392.95	539	627300
	1	16	134	5.38183	4.19959	0.827432	1097.45	529	303395
	1	16	133	1.68471	1.12835	0.794663	1020.58	487	74247
	1	16	136	2.62563	1.92176	0.829226	1091.39	452	167325
	1	16	135	4.3178	3.37721	0.853461	1210.44	447	322894
