# Supplementary material for: PomX, a ParA/MinD ATPase activating protein, is a triple regulator of cell division in Myxococcus xanthus
Source: eLife. 2021 Mar 18;10:e66160. doi: 10.7554/eLife.66160 (PMC7993993; doi:10.7554/eLife.66160)
Supplement: Figure 5—source data 2. [file elife-66160-fig5-data2.xlsx]

## Sheet: Figure 5-source data 2
Source data for Figure 5B
PomXK13AR15A-His6									PomXK13AR15A-His6 + PomY-His6
