# Supplementary material for: PomX, a ParA/MinD ATPase activating protein, is a triple regulator of cell division in Myxococcus xanthus
Source: eLife. 2021 Mar 18;10:e66160. doi: 10.7554/eLife.66160 (PMC7993993; doi:10.7554/eLife.66160)
Supplement: Figure 5—source data 3. [file elife-66160-fig5-data3.xlsx]

## Sheet: Figure 5-source data 3
Source data for Figure 5C
												1	Marker
												2	Supernatant	PomX-His6
												3	Pellet	PomX-His6
												4	Supernatant	PomX-His6+PomY-His6
												5	Pellet	PomX-His6+PomY-His6
												6	Supernatant	PomXK13AR15A-His6
												7	Pellet	PomXK13AR15A-His6
												8	Supernatant	PomXK13AR15A-His6+PomY-His6
												9	Pellet	PomXK13AR15A-His6+PomY-His6
												10	Supernatant	not relevant
												11	Pellet	not relevant
												12	Supernatant	not relevant
												13	Pellet	not relevant
												14	Supernatant	PomY-His6
												15	Pellet	PomY-His6
											Quantifications	Lane
											PomX
											Supernatant PomX-His6	2	489.335	9252.58	5.28863
											Pellet PomX-His6	3	8763.25		94.7114
											Supernatant PomX-His6 + PomY-His6	4	618.456	6562.49	9.42411
											Pellet PomX-His6 + PomY-His6	5	5944.03		90.5759
											PomXK13AR15A
											Supernatant PomXK13AR15A-His6	6	321.627	12356.6	2.60288
											Pellet PomXK13AR15A-His6	7	12035		97.3971
											Supernatant PomXK13AR15A-His6+PomY-His6	8	623.991	8847.15	7.05302
											Pellet PomXK13AR15A-His6+PomY-His6	9	8223.15		92.947
											PomY
											Supernatant PomX-His6 + PomY-His6	4	3574.3	7769.73	46.0029
											Pellet PomX-His6 + PomY-His6	5	4195.43		53.9971
											Supernatant PomXK13AR15A-His6+PomY-His6	8	3338.72	7317.63	45.6257
											Pellet PomXK13AR15A-His6+PomY-His6	9	3978.91		54.3743
											Supernatant PomY-His6	14	5116.91	7776.73	65.7977
											Pellet PomY-His6	15	2659.82		34.2023
