# Supplementary material for: PomX, a ParA/MinD ATPase activating protein, is a triple regulator of cell division in Myxococcus xanthus
Source: eLife. 2021 Mar 18;10:e66160. doi: 10.7554/eLife.66160 (PMC7993993; doi:10.7554/eLife.66160)
Supplement: Figure 5—source data 4. [file elife-66160-fig5-data4.xlsx]

## Sheet: Figure 5-source data 4
Source data for Figure 5D
PomZ+PomXK13R15A																			minus DNA			plus DNA						PomZ+PomX NK13R15A																				minus DNA
PomXK13AR15A µM	Herring Sperm DNA [µg/mL]	µM His6-PomZ	Δ340nm 1	Δ340nm 2	Δ340nm 3	Δ340nm 1 - ØKontrolle	Δ340nm 2 - ØKontrolle	Δ340nm 3 - ØKontrolle	d [cm]	Activity [Pi/min/ Protein]	Activity [Pi/min/ Protein]	Activity [Pi/min/ Protein]	Activity [Pi/min/ Protein]	Activity [Pi/min/ Protein]	Activity [Pi/min/ Protein]				MEAN	STDEV		MEAN	STDEV					PomX N-terminusK13R15A µM	Herring Sperm DNA [µg/mL]	µM His6-PomZ	Δ340nm 1	Δ340nm 2	Δ340nm 3	Δ340nm 1 - ØKontrolle	Δ340nm 2 - ØKontrolle	Δ340nm 3 - ØKontrolle	d [cm]	Activity [Pi/min/ Protein]	Activity [Pi/min/ Protein]	Activity [Pi/min/ Protein]	Activity [Pi/min/ Protein]	Activity [Pi/min/ Protein]	Activity [Pi/min/ Protein]					MEAN	STDEV
0	0	4	0.00173	0.00164	0.00178	0.00075	0.00066	0.0008	0.248189	0.120107	0.105694	0.128114	7.20641	6.34164	7.68684			0	6.37367	1.09386		11.1182	2.3148					0	0	4	0.00184	0.00175	0.00193	0.001133	0.001043	0.001223	0.248189	0.181441	0.167029	0.195854	10.8865	10.0217	11.7513				0	6.48417	4.86949
0.5	0	4	0.00153	0.00155	0.00168	0.000534333	0.000554333	0.000684333	0.248189	0.0855695	0.0887723	0.109591	5.13417	5.32634	6.57545			0.5	6.12225	0.900557		11.1491	3.69479					0.5	0	4	0.00148	0.00173	0.00162	0.000768333	0.00101833	0.000908333	0.248189	0.123043	0.163078	0.145463	7.38257	9.78471	8.72777				0.5	7.05428	2.01048
1	0	4	0.00148	0.00162	0.00144	0.000568	0.000708	0.000528	0.248189	0.0909609	0.113381	0.0845552	5.45766	6.80285	5.07331			1	6.46015	1.13944		10.5	3.81394					1	0	4	0.00151	0.00167	0.0014	0.000701333	0.000861333	0.000591333	0.248189	0.112313	0.137936	0.0946976	6.7388	8.27616	5.68186				1	5.41922	1.94065
2	0	4	0.00165	0.00153	0.00157	0.000764667	0.000644667	0.000684667	0.248189	0.122456	0.103239	0.109644	7.34734	6.19431	6.57865			2	6.81246	0.801524		15.2989	5.75694					2	0	4	0.00177	0.00146	0.00143	0.000962333	0.000652333	0.000622333	0.248189	0.15411	0.104466	0.099662	9.24663	6.26798	5.97972				2	7.45143	1.30672
4	0	4	0.00151	0.00166	0.00151	0.000426667	0.000576667	0.000426667	0.248189	0.0683275	0.0923488	0.0683275	4.09965	5.54093	4.09965			4	5.52492	1.43433		11.7118	2.60486					4	0	4	0.00153	0.00146	0.00166	0.000643	0.000573	0.000773	0.248189	0.102972	0.0917616	0.12379	6.1783	5.5057	7.42741				4	7.09912	1.11369
6	0	4	0.00193	0.00171	0.00178	0.000806667	0.000586667	0.000656667	0.248189	0.129182	0.0939503	0.10516	7.7509	5.63702	6.30961			6	7.09431	1.42183		15.1495	3.77301					6	0	4	0.0015	0.0013	0.00135	0.000333333	0.000133333	0.000183333	0.248189	0.0533808	0.0213523	0.0293595	3.20285	1.28114	1.76157				6	5.56175	3.93846
8	0	4	0.00197	0.00181	0.00175	0.00073	0.00057	0.00051	0.248189	0.116904	0.0912812	0.0816727	7.01424	5.47687	4.90036			8	5.8452	0.906299		14.7651	7.60169					8	0	4	0.00144	0.00159	0.00137	0.00041	0.00056	0.00034	0.248189	0.0656584	0.0896798	0.0544484	3.9395	5.38079	3.26691				8	5.57296	1.74865
10	0	4	0.00198	0.00211	0.00186	0.000735	0.000865	0.000615	0.248189	0.117705	0.138523	0.0984876	7.06228	8.31139	5.90926			10	7.34253	1.28533		16.831	8.0942					10	0	4	0.00147	0.00162	0.00142	0.00033	0.00048	0.00028	0.248189	0.052847	0.0768684	0.0448399	3.17082	4.6121	2.69039				10	5.29271	2.4462
12	0	4	0.00178	0.00184	0.00231	0.00017	0.00023	0.0007	0.248189	0.0272242	0.0368328	0.1121	1.63345	2.20997	6.72598			12	5.14057	2.67347		11.2527	10.3782					12	0	4	0.00156	0.00151	0.00173	0.00036	0.00031	0.00053	0.248189	0.0576513	0.0496442	0.0848755	3.45908	2.97865	5.09253				12	3.87545	0.832494
15	0	4	0.00205	0.00202	0.002	0.000353333	0.000323333	0.000303333	0.248189	0.0565837	0.0517794	0.0485766	3.39502	3.10676	2.91459			15	3.66726	1.10631		8.76513	10.9632					15	0	4	0.00168	0.00163	0.00162	0.000286667	0.000236667	0.000226667	0.248189	0.0459075	0.0379004	0.036299	2.75445	2.27402	2.17794				15	4.29182	2.29401
										Kontrolle 1	Kontrolle 2	Kontrolle 3	ØKontrolle	µM PomX-His6																								Kontrolle 1	Kontrolle 2	Kontrolle 3	ØKontrolle	µM PomX-His6
										0.000948	0.000997	0.000995	0.00098	0																								0.000692	0.000734	0.000695	0.000707	0
										0.00099	0.00101	0.000987	0.000995667	0.5																								0.00071	0.000714	0.000711	0.000711667	0.5
										0.000941	0.000893	0.000902	0.000912	1																								0.000811	0.000793	0.000822	0.000808667	1
										0.000883	0.000877	0.000896	0.000885333	2																								0.000789	0.000797	0.000837	0.000807667	2
										0.00108	0.00103	0.00114	0.00108333	4																								0.000883	0.000906	0.000872	0.000887	4
										0.00114	0.00108	0.00115	0.00112333	6																								0.00116	0.00118	0.00116	0.00116667	6
										0.00123	0.00121	0.00125	0.00124	8																								0.00101	9.87	0.00105	0.00103	8
										0.00121	0.00123	0.00128	0.001245	10																								0.00113	0.00122	0.00115	0.00114	10
										0.00142	0.0015	0.00191	0.00161	12																								0.00119	0.00122	0.00119	0.0012	12
										0.00191	0.00167	0.00151	0.00169667	15																								0.00141	0.00139	0.00138	0.00139333	15
PomZ+PomXK13R15A																												PomZ+PomX NK13R15A
PomXK13AR15A µM	Herring Sperm DNA [µg/mL]	µM His6-PomZ	Δ340nm 1	Δ340nm 2	Δ340nm 3	Δ340nm 1 - ØKontrolle	Δ340nm 2 - ØKontrolle	Δ340nm 3 - ØKontrolle	d [cm]	Activity [Pi/min/ Protein]	Activity [Pi/min/ Protein]	Activity [Pi/min/ Protein]	Activity [Pi/min/ Protein]	Activity [Pi/min/ Protein]	Activity [Pi/min/ Protein]													PomX N-terminusK13R15A µM	Herring Sperm DNA [µg/mL]	µM His6-PomZ	Δ340nm 1	Δ340nm 2	Δ340nm 3	Δ340nm 1 - ØKontrolle	Δ340nm 2 - ØKontrolle	Δ340nm 3 - ØKontrolle	d [cm]	Activity [Pi/min/ Protein]	Activity [Pi/min/ Protein]	Activity [Pi/min/ Protein]	Activity [Pi/min/ Protein]	Activity [Pi/min/ Protein]	Activity [Pi/min/ Protein]
0	0	4	0.00179	0.00171	0.00192	0.000573333	0.000493333	0.000703333	0.248189	0.091815	0.0790036	0.112634	5.5089	4.74022	6.75801													0	0	4	0.00159	0.00152	0.00165	0.00022	0.00015	0.00028	0.248189	0.0352313	0.0240214	0.0448399	2.11388	1.44128	2.69039
0.5	0	4	0.0018	0.00176	0.00194	0.00065	0.00061	0.00079	0.248189	0.104093	0.0976869	0.126513	6.24556	5.86121	7.59075													0.5	0	4	0.00152	0.00173	0.00155	0.00049	0.0007	0.00052	0.248189	0.0784698	0.1121	0.0832741	4.70819	6.72598	4.99645
1	0	4	0.0018	0.00189	0.00168	0.000753333	0.000843333	0.000633333	0.248189	0.120641	0.135053	0.101424	7.23844	8.10321	6.08541													1	0	4	0.00163	0.00177	0.00155	0.00039	0.00053	0.00031	0.248189	0.0624556	0.0848755	0.0496442	3.74733	5.09253	2.97865
2	0	4	0.00187	0.00164	0.00174	0.00084	0.00061	0.00071	0.248189	0.13452	0.0976869	0.113701	8.07118	5.86121	6.82207													2	0	4	0.00179	0.00161	0.00171	0.000892	0.000712	0.000812	0.248189	0.142847	0.114021	0.130036	8.57083	6.84129	7.80214
4	0	4	0.0018	0.00204	0.0018	0.000593333	0.000833333	0.000593333	0.248189	0.0950179	0.133452	0.0950179	5.70107	8.00712	5.70107													4	0	4	0.00166	0.00177	0.00162	0.000791333	0.000901333	0.000751333	0.248189	0.126726	0.144342	0.12032	7.60356	8.66051	7.21922
6	0	4	0.00225	0.0019	0.00199	0.000996667	0.000646667	0.000736667	0.248189	0.159609	0.103559	0.117972	9.57652	6.21353	7.0783													6	0	4	0.00179	0.00204	0.0019	0.000821	0.001071	0.000931	0.248189	0.131477	0.171513	0.149093	7.88862	10.2908	8.94556
8	0	4	0.00205	0.00198	0.00186	0.0007	0.00063	0.00051	0.248189	0.1121	0.10089	0.0816727	6.72598	6.05339	4.90036													8	0	4	0.00195	0.00179	0.00179	0.00083	0.00067	0.00067	0.248189	0.132918	0.107295	0.107295	7.9751	6.43773	6.43773
10	0	4	0.00218	0.00247	0.00219	0.00069	0.00098	0.0007	0.248189	0.110498	0.15694	0.1121	6.6299	9.41638	6.72598													10	0	4	0.0018	0.00178	0.00216	0.000625	0.000605	0.000985	0.248189	0.100089	0.0968862	0.15774	6.00534	5.81317	9.46442
12	0	4	0.0024	0.00213	0.00213	0.000883333	0.000613333	0.000613333	0.248189	0.141459	0.0982207	0.0982207	8.48755	5.89324	5.89324													12	0	4	0.00173	0.00187	0.00176	0.00035	0.00049	0.00038	0.248189	0.0560499	0.0784698	0.0608541	3.36299	4.70819	3.65125
15	0	4	0.00214	0.00237	0.00208	0.00038	0.00061	0.00032	0.248189	0.0608541	0.0976869	0.0512456	3.65125	5.86121	3.07474													15	0	4	0.00189	0.00186	0.00215	0.000566667	0.000536667	0.000826667	0.248189	0.0907474	0.0859431	0.132384	5.44484	5.15659	7.94307
										Kontrolle 1	Kontrolle 2	Kontrolle 3	ØKontrolle	µM PomX-His6																								Kontrolle 1	Kontrolle 2	Kontrolle 3	ØKontrolle	µM PomX-His6
										0.00118	0.0012	0.00127	0.00121667	0																								0.00135	0.0014	0.00136	0.00137	0
										0.00119	0.00112	0.00114	0.00115	0.5																								0.00103	0.00102	0.00104	0.00103	0.5
										0.00106	0.00102	0.00106	0.00104667	1																								0.0012	0.00124	0.00128	0.00124	1
										0.00104	0.00101	0.00104	0.00103	2																								0.000878	0.000892	0.000924	0.000898	2
										0.00116	0.00124	0.00122	0.00120667	4																								0.000853	0.000869	0.000884	0.000868667	4
										0.00125	0.00125	0.00126	0.00125333	6																								0.000948	0.000964	0.000995	0.000969	6
										0.00134	0.00122	0.00136	0.00135	8																								0.00111	0.0011	0.00113	0.00112	8
										0.00144	0.00137	0.00154	0.00149	10																								0.00116	0.00119	0.00119	0.001175	10
										0.00154	0.00147	0.00154	0.00151667	12																								0.00136	0.00136	0.00142	0.00138	12
										0.0017	0.0018	0.00178	0.00176	15																								0.00133	0.00128	0.00136	0.00132333	15
PomZ+DNA+PomXK13R15A																												PomZ+DNA+PomX NK13R15A
PomXK13AR15A µM	Herring Sperm DNA [µg/mL]	µM His6-PomZ	Δ340nm 1	Δ340nm 2	Δ340nm 3	Δ340nm 1 - ØKontrolle	Δ340nm 2 - ØKontrolle	Δ340nm 3 - ØKontrolle	d [cm]	Activity [Pi/min/ Protein]	Activity [Pi/min/ Protein]	Activity [Pi/min/ Protein]	Activity [Pi/min/ Protein]	Activity [Pi/min/ Protein]	Activity [Pi/min/ Protein]													PomX N-terminusK13R15A µM	Herring Sperm DNA [µg/mL]	µM His6-PomZ	Δ340nm 1	Δ340nm 2	Δ340nm 3	Δ340nm 1 - ØKontrolle	Δ340nm 2 - ØKontrolle	Δ340nm 3 - ØKontrolle	d [cm]	Activity [Pi/min/ Protein]	Activity [Pi/min/ Protein]	Activity [Pi/min/ Protein]	Activity [Pi/min/ Protein]	Activity [Pi/min/ Protein]	Activity [Pi/min/ Protein]
0	60	4	0.00317	0.00307	0.00326	0.00143	0.00133	0.00152	0.248189	0.229004	0.212989	0.243417	13.7402	12.7794	14.605													0	60	4	0.00238	0.00231	0.00248	0.000983333	0.000913333	0.00108333	0.248189	0.157473	0.146263	0.173488	9.44841	8.77581	10.4093
0.5	60	4	0.00346	0.00328	0.00319	0.00170667	0.00152667	0.00143667	0.248189	0.27331	0.244484	0.230071	16.3986	14.6691	13.8043													0.5	60	4	0.00182	0.00197	0.00186	0.000814333	0.000964333	0.000854333	0.248189	0.130409	0.154431	0.136815	7.82456	9.26584	8.2089
1	60	4	0.00315	0.00388	0.0033	0.00112	0.00185	0.00127	0.248189	0.17936	0.296264	0.203381	10.7616	17.7758	12.2029													1	60	4	0.00194	0.00208	0.00184	0.000944333	0.00108433	0.000844333	0.248189	0.151228	0.173648	0.135214	9.07367	10.4189	8.11282
2	60	4	0.00468	0.00418	0.00458	0.00232333	0.00182333	0.00222333	0.248189	0.372064	0.291993	0.35605	22.3239	17.5196	21.363													2	60	4	0.00194	0.00189	0.00196	0.000923333	0.000873333	0.000943333	0.248189	0.147865	0.139858	0.151068	8.87189	8.39147	9.06406
4	60	4	0.00481	0.00461	0.00481	0.00159667	0.00139667	0.00159667	0.248189	0.255694	0.223666	0.255694	15.3416	13.4199	15.3416													4	60	4	0.00193	0.00212	0.00189	0.000893333	0.00108333	0.000853333	0.248189	0.143061	0.173488	0.136655	8.58364	10.4093	8.19929
6	60	4	0.00577	0.00555	0.00572	0.00212667	0.00190667	0.00207667	0.248189	0.34057	0.305338	0.332563	20.4342	18.3203	19.9538													6	60	4	0.00222	0.00191	0.00208	0.00109	0.00078	0.00095	0.248189	0.174555	0.124911	0.152135	10.4733	7.49467	9.12812
8	60	4	0.00646	0.00661	0.00638	0.00204	0.00219	0.00196	0.248189	0.326691	0.350712	0.313879	19.6014	21.0427	18.8328													8	60	4	0.00232	0.00204	0.00208	0.001025	0.000745	0.000785	0.248189	0.164146	0.119306	0.125712	9.84876	7.15837	7.54271
10	60	4	0.0077	0.00755	0.00711	0.00289	0.00274	0.0023	0.248189	0.462812	0.43879	0.368328	27.7687	26.3274	22.0997													10	60	4	0.0024	0.00251	0.00229	0.000945	0.001055	0.000835	0.248189	0.151335	0.16895	0.133719	9.08008	10.137	8.02314
12	60	4	0.00768	0.00689	0.00699	0.00222333	0.00143333	0.00153333	0.248189	0.35605	0.229538	0.245552	21.363	13.7723	14.7331													12	60	4	0.00231	0.00256	0.00224	0.000923333	0.00117333	0.000853333	0.248189	0.147865	0.187901	0.136655	8.87189	11.274	8.19929
15	60	4	0.00758	0.00783	0.00766	0.00173	0.00198	0.00181	0.248189	0.277046	0.317082	0.289858	16.6228	19.0249	17.3915													15	60	4	0.00259	0.00251	0.00247	0.00110333	0.00102333	0.000983333	0.248189	0.176691	0.163879	0.157473	10.6014	9.83275	9.44841
										Kontrolle 1	Kontrolle 2	Kontrolle 3	ØKontrolle	µM PomX-His6																								Kontrolle 1	Kontrolle 2	Kontrolle 3	ØKontrolle	µM PomX-His6
										0.00173	0.00174	0.00175	0.00174	0																								0.00137	0.00142	0.0014	0.00139667	0
										0.00175	0.00172	0.00179	0.00175333	0.5																								0.00102	0.000997	0.001	0.00100567	0.5
										0.00206	0.00201	0.00202	0.00203	1																								0.00098	0.000977	0.00103	0.000995667	1
										0.00234	0.00234	0.00239	0.00235667	2																								0.001	0.001	0.00105	0.00101667	2
										0.00323	0.00318	0.00323	0.00321333	4																								0.00102	0.00101	0.00108	0.00103667	4
										0.00359	0.00355	0.00379	0.00364333	6																								0.00111	0.00119	0.00109	0.00113	6
										0.00439	0.00459	0.00445	0.00442	8																								0.00145	0.00109	0.00114	0.001295	8
										0.00479	0.00458	0.00483	0.00481	10																								0.00144	0.00148	0.00147	0.001455	10
										0.00537	0.0055	0.0055	0.00545667	12																								0.00133	0.00141	0.00142	0.00138667	12
										0.00562	0.00594	0.00599	0.00585	15																								0.0015	0.00146	0.0015	0.00148667	15
PomZ+DNA+PomXK13R15A																												PomZ+DNA+PomX NK13R15A
PomXK13AR15A µM	Herring Sperm DNA [µg/mL]	µM His6-PomZ	Δ340nm 1	Δ340nm 2	Δ340nm 3	Δ340nm 1 - ØKontrolle	Δ340nm 2 - ØKontrolle	Δ340nm 3 - ØKontrolle	d [cm]	Activity [Pi/min/ Protein]	Activity [Pi/min/ Protein]	Activity [Pi/min/ Protein]	Activity [Pi/min/ Protein]	Activity [Pi/min/ Protein]	Activity [Pi/min/ Protein]													PomX N-terminusK13R15A µM	Herring Sperm DNA [µg/mL]	µM His6-PomZ	Δ340nm 1	Δ340nm 2	Δ340nm 3	Δ340nm 1 - ØKontrolle	Δ340nm 2 - ØKontrolle	Δ340nm 3 - ØKontrolle	d [cm]	Activity [Pi/min/ Protein]	Activity [Pi/min/ Protein]	Activity [Pi/min/ Protein]	Activity [Pi/min/ Protein]	Activity [Pi/min/ Protein]	Activity [Pi/min/ Protein]
0	60	4	0.00182	0.00177	0.00197	0.00111033	0.00106033	0.00126033	0.248189	0.177812	0.169804	0.201833	10.6687	10.1883	12.11													0	60	4	0.00167	0.00181	0.00189	0.000573333	0.000713333	0.000793333	0.248189	0.091815	0.114235	0.127046	5.5089	6.8541	7.62278
0.5	60	4	0.00194	0.00189	0.00209	0.001191	0.001141	0.001341	0.248189	0.19073	0.182723	0.214751	11.4438	10.9634	12.8851													0.5	60	4	0.00204	0.00225	0.00207	0.00087	0.00108	0.0009	0.248189	0.139324	0.172954	0.144128	8.35944	10.3772	8.64769
1	60	4	0.00169	0.00245	0.00163	0.000795	0.001555	0.000735	0.248189	0.127313	0.249022	0.117705	7.6388	14.9413	7.06228													1	60	4	0.00204	0.00216	0.00184	0.00108467	0.00120467	0.000884667	0.248189	0.173701	0.192918	0.141673	10.4221	11.5751	8.50036
2	60	4	0.00335	0.00304	0.00265	0.00211333	0.00180333	0.00141333	0.248189	0.338434	0.28879	0.226335	20.3061	17.3274	13.5801													2	60	4	0.00203	0.0017	0.00183	0.00108233	0.000752333	0.000882333	0.248189	0.173328	0.120481	0.141299	10.3997	7.22883	8.47794
4	60	4	0.00328	0.00322	0.00328	0.0012	0.00114	0.0012	0.248189	0.192171	0.182562	0.192171	11.5303	10.9537	11.5303													4	60	4	0.00202	0.0019	0.00195	0.00104667	0.000926667	0.000976667	0.248189	0.167616	0.148399	0.156406	10.0569	8.90392	9.38435
6	60	4	0.00435	0.00399	0.00408	0.00161333	0.00125333	0.00134333	0.248189	0.258363	0.200712	0.215125	15.5018	12.0427	12.9075													6	60	4	0.0021	0.0019	0.00197	0.000956667	0.000756667	0.000826667	0.248189	0.153203	0.121174	0.132384	9.19218	7.27047	7.94307
8	60	4	0.00515	0.00523	0.0051	0.00205	0.00213	0.002	0.248189	0.328292	0.341103	0.320285	19.6975	20.4662	19.2171													8	60	4	0.00246	0.00206	0.00205	0.00128	0.00088	0.00087	0.248189	0.204982	0.140925	0.139324	12.2989	8.45552	8.35944
10	60	4	0.00542	0.00547	0.00534	0.001865	0.001915	0.001785	0.248189	0.298666	0.306673	0.285854	17.9199	18.4004	17.1513													10	60	4	0.00238	0.00273	0.00259	0.001165	0.001515	0.001375	0.248189	0.186566	0.242616	0.220196	11.194	14.557	13.2118
12	60	4	0.00551	0.00629	0.0054	0.00172667	0.00250667	0.00161667	0.248189	0.276513	0.401424	0.258897	16.5908	24.0854	15.5338													12	60	4	0.00234	0.00255	0.00238	0.00107	0.00128	0.00111	0.248189	0.171352	0.204982	0.177758	10.2811	12.2989	10.6655
15	60	4	0.00588	0.00567	0.00607	0.00143667	0.00122667	0.00162667	0.248189	0.230071	0.196441	0.260498	13.8043	11.7865	15.6299													15	60	4	0.00273	0.00273	0.00276	-0.00171333	0.00116667	0.00119667	0.248189	-0.274377	0.186833	0.191637	-16.4626	11.21	11.4982
										Kontrolle 1	Kontrolle 2	Kontrolle 3	ØKontrolle	µM PomX-His6																								Kontrolle 1	Kontrolle 2	Kontrolle 3	ØKontrolle	µM PomX-His6
										0.000726	0.00069	0.000713	0.000709667	0																								0.0011	0.0011	0.00109	0.00109667	0
										0.000749	0.000725	0.000773	0.000749	0.5																								0.00117	0.00115	0.00119	0.00117	0.5
										0.000908	0.000884	0.000893	0.000895	1																								0.000939	0.000992	0.000935	0.000955333	1
										0.00123	0.00122	0.00126	0.00123667	2																								0.000904	0.000971	0.000968	0.000947667	2
										0.00205	0.00211	0.00208	0.00208	4																								0.000952	0.000958	0.00101	0.000973333	4
										0.00277	0.0027	0.00274	0.00273667	6																								0.00112	0.00113	0.00118	0.00114333	6
										0.00308	0.0033	0.00312	0.0031	8																								0.00115	0.00116	0.00121	0.00118	8
										0.00352	0.00383	0.00359	0.003555	10																								0.00119	0.00123	0.00124	0.001215	10
										0.00371	0.00387	0.00377	0.00378333	12																								0.00123	0.00126	0.00132	0.00127	12
										0.00422	0.0045	0.00461	0.00444333	15																								0.00159	0.00154	0.00156	0.00156333	15
PomZ+DNA+PomXK13R15A
PomXK13AR15A µM	Herring Sperm DNA [µg/mL]	µM His6-PomZ	Δ340nm 1	Δ340nm 2	Δ340nm 3	Δ340nm 1 - ØKontrolle	Δ340nm 2 - ØKontrolle	Δ340nm 3 - ØKontrolle	d [cm]	Activity [Pi/min/ Protein]	Activity [Pi/min/ Protein]	Activity [Pi/min/ Protein]	Activity [Pi/min/ Protein]	Activity [Pi/min/ Protein]	Activity [Pi/min/ Protein]
0	60	4	0.00179	0.00182	0.00192	0.000847667	0.000877667	0.000977667	0.248189	0.135747	0.140552	0.156566	8.14485	8.4331	9.39396
0.5	60	4	0.00194	0.00188	0.00197	0.00071	0.00065	0.00074	0.248189	0.113701	0.104093	0.118505	6.82207	6.24556	7.11033
1	60	4	0.00224	0.0024	0.00217	0.000806667	0.000966667	0.000736667	0.248189	0.129182	0.154804	0.117972	7.7509	9.28826	7.0783
2	60	4	0.00299	0.003	0.00304	0.000856667	0.000866667	0.000906667	0.248189	0.137189	0.13879	0.145196	8.23132	8.32741	8.71175
4	60	4	0.00419	0.00444	0.00419	0.000863333	0.00111333	0.000863333	0.248189	0.138256	0.178292	0.138256	8.29538	10.6975	8.29538
6	60	4	0.00557	0.00599	0.00544	0.00119333	0.00161333	0.00106333	0.248189	0.191103	0.258363	0.170285	11.4662	15.5018	10.2171
8	60	4	0.00634	0.00639	0.00625	0.0005	0.00055	0.00041	0.248189	0.0800712	0.0880784	0.0656584	4.80427	5.2847	3.9395
10	60	4	0.00793	0.00827	0.00833	0.00051	0.00085	0.00091	0.248189	0.0816727	0.136121	0.14573	4.90036	8.16727	8.74378
12	60	4	0.00919	0.00868	0.00834	0.000286667	-0.000223333	-0.000563333	0.248189	0.0459075	-0.0357652	-0.0902136	2.75445	-2.14591	-5.41282
15	60	4	0.0104	0.0115	0.0107	-0.001	0.0001	-0.0007	0.248189	-0.160142	0.0160142	-0.1121	-9.60855	0.960855	-6.72598
										Kontrolle 1	Kontrolle 2	Kontrolle 3	ØKontrolle	µM PomX-His6
										0.000932	0.000885	0.00101	0.000942333	0
										0.00138	0.00114	0.00117	0.00123	0.5
										0.00159	0.00137	0.00134	0.00143333	1
										0.00224	0.00204	0.00212	0.00213333	2
										0.00342	0.00322	0.00334	0.00332667	4
										0.00454	0.00422	0.00437	0.00437667	6
										0.00591	0.0055	0.00577	0.00584	8
										0.00745	0.00717	0.00739	0.00742	10
										0.00886	0.00909	0.00876	0.00890333	12
										0.0115	0.0115	0.0112	0.0114	15
