# Supplementary material for: PomX, a ParA/MinD ATPase activating protein, is a triple regulator of cell division in Myxococcus xanthus
Source: eLife. 2021 Mar 18;10:e66160. doi: 10.7554/eLife.66160 (PMC7993993; doi:10.7554/eLife.66160)
Supplement: Figure 5—source data 5. [file elife-66160-fig5-data5.xlsx]

## Sheet: Figure 5-source data 5
Source data for Figure 5E
PomZ+PomX NPEP																																	PomZ+PomX NPEPK13AR15A
PomX N peptide µM	Herring Sperm DNA [µg/mL]	µM His6-PomZ	Δ340nm 1	Δ340nm 2	Δ340nm 3	Δ340nm 1 - ØKontrolle	Δ340nm 2 - ØKontrolle	Δ340nm 3 - ØKontrolle	d [cm]	Activity [Pi/min/ Protein]	Activity [Pi/min/ Protein]	Activity [Pi/min/ Protein]	Activity [Pi/h/ Protein]	Activity [Pi/h/ Protein]	Activity [Pi/h/ Protein]	Ø	STDw	Norm. Activity 1	Norm. Activity 2	Norm. Activity 3		protein conc.	minus DNA			plus DNA							PomX N K13AR15A peptide µM	Herring Sperm DNA [µg/mL]	µM His6-PomZ	Δ340nm 1	Δ340nm 2	Δ340nm 3	Δ340nm 1 - ØKontrolle	Δ340nm 2 - ØKontrolle	Δ340nm 3 - ØKontrolle	d [cm]	Activity [Pi/min/ Protein]	Activity [Pi/min/ Protein]	Activity [Pi/min/ Protein]	Activity [Pi/min/ Protein]	Activity [Pi/min/ Protein]	Activity [Pi/min/ Protein]	Ø
0	0	4	0.00131	0.00117	0.00105	0.000600333	0.000460333	0.000340333	0.248189	0.0961389	0.0737189	0.0545018	5.76833	4.42314	3.27011	4.48719	1.25034	8.74075	6.70238	4.9552			MEAN	STDEV		MEAN	STDEV						0	0	4	0.0012	0.00126	0.00116	0.000314	0.000374	0.000274	0.248189	0.0502847	0.0598933	0.043879	3.01708	3.5936	2.63274	3.08114
0.5	0	4	0.00132	0.00102	0.0011	0.000650333	0.000350333	0.000430333	0.248189	0.104146	0.0561032	0.0689146	6.24876	3.36619	4.13488	4.58328	1.49268	9.46875	5.1008	6.26558		0	7.4425	1.72812		12.6666	2.01402						0.5	0	4	0.00112	0.00111	0.00122	0.000398667	0.000388667	0.000498667	0.248189	0.0638435	0.062242	0.0798577	3.83061	3.73452	4.79146	4.11886
1	0	4	0.00103	0.00123	0.000998	0.000253667	0.000453667	0.000221667	0.248189	0.0406228	0.0726513	0.0354982	2.43737	4.35908	2.12989	2.97545	1.20808	3.69334	6.60531	3.22743		0.5	7.46677	1.78128		15.7618	2.2059						1	0	4	0.00111	0.00111	0.00119	0.000443	0.000443	0.000523	0.248189	0.0709431	0.0709431	0.0837545	4.25659	4.25659	5.02527	4.51282
2	0	4	0.00127	0.00111	0.00105	0.000572	0.000412	0.000352	0.248189	0.0916015	0.0659787	0.0563702	5.49609	3.95872	3.38221	4.27901	1.09273	8.32822	5.99865	5.12506		1	5.70503	1.95331		17.8856	1.57153						2	0	4	0.0013	0.00119	0.00116	0.000599	0.000489	0.000459	0.248189	0.0959253	0.0783097	0.0735054	5.75552	4.69858	4.41032	4.95481
4	0	4	0.00129	0.00105	0.00116	0.000589	0.000349	0.000459	0.248189	0.0943239	0.0558897	0.0735054	5.65944	3.35338	4.41032	4.47438	1.15436	8.57574	5.08138	6.68296		2	6.89408	1.32636		20.4269	2.78278						4	0	4	0.00109	0.00119	0.00108	0.000348333	0.000448333	0.000338333	0.248189	0.055783	0.0717972	0.0541815	3.34698	4.30783	3.25089	3.63523
6	0	4	0.00131	0.00109	0.000996	0.000620667	0.000400667	0.000306667	0.248189	0.0993951	0.0641638	0.0491104	5.96371	3.84983	2.94662	4.25338	1.5485	9.0368	5.83364	4.46502		4	6.88437	1.4527		22.7653	2.38201						6	0	4	0.00111	0.00105	0.00106	0.000362333	0.000302333	0.000312333	0.248189	0.058025	0.0484164	0.0500178	3.4815	2.90498	3.00107	3.12918
8	0	4		0.00121	0.0014		0.0005155	0.0007055	0.248189		0.0825534	0.112981		4.95321	6.77883	5.86602	1.29091		7.50559	10.272		6	6.5131	1.60213		23.2776	3.03049						8	0	4	0.00113	0.00111	0.00125	0.000367	0.000347	0.000487	0.248189	0.0587723	0.0555694	0.0779894	3.52634	3.33417	4.67936	3.84662
10	0	4		0.00121	0.00143		0.000504	0.000724	0.248189		0.0807118	0.115943		4.84271	6.95659	5.89965	1.49474		7.33816	10.5413		8	6.69316	2.3513		24.4235	3.73537						10	0	4	0.00107	0.00109	0.00116	0.000273333	0.000293333	0.000363333	0.248189	0.0437723	0.0469751	0.0581851	2.62634	2.81851	3.49111	2.97865
12	0	4	0.0011	0.00123	0.00104	0.000378333	0.000508333	0.000318333	0.248189	0.0605872	0.0814058	0.0509787	3.63523	4.88435	3.05872	3.85943	0.933234	5.50847	7.40125	4.63488		10	7.33816	2.19607		26.3977	4.25613						12	0	4	0.00117	0.00118	0.00129	0.000335667	0.000345667	0.000455667	0.248189	0.0537545	0.0553559	0.0729716	3.22527	3.32136	4.3783	3.64164
15	0	4	0.00116	0.0011	0.00131	0.000456333	0.000396333	0.000606333	0.248189	0.0730784	0.0634698	0.0970997	4.3847	3.80819	5.82598	4.67296	1.03932	6.64414	5.77055	8.82811		12	6.27044	1.17408		29.398	8.17227						15	0	4	0.00118	0.00126	0.0012	0.000268	0.000348	0.000288	0.248189	0.0429182	0.0557296	0.046121	2.57509	3.34377	2.76726	2.89538
																						15	5.04013	2.67003		27.1444	4.60045																Kontrolle 1	Kontrolle 2	Kontrolle 3	ØKontrolle	µM PomX-His6
										Kontrolle 1	Kontrolle 2	Kontrolle 3	ØKontrolle	µM PomX-His6																													0.000902	0.000874	0.000882	0.000886	0
										0.000695	0.000723	0.000711	0.000709667	0																													0.00068	0.000727	0.000757	0.000721333	0.5
										0.00067	0.000684	0.000655	0.000669667	0.5																													0.000631	0.000704	0.000666	0.000667	1
										0.000793	0.000756	0.00078	0.000776333	1																													0.000663	0.000752	0.000688	0.000701	2
										0.000668	0.000728	0.000698	0.000698	2																													0.000717	0.000776	0.000732	0.000741667	4
										0.000715	0.00066	0.000728	0.000701	4																													0.000765	0.000723	0.000755	0.000747667	6
										0.000693	0.000677	0.000698	0.000689333	6																													0.000753	0.00078	0.000756	0.000763	8
										0.000685	0.000711	0.000704	0.0006945	8																													0.000761	0.000825	0.000804	0.000796667	10
										0.000729	0.000728	0.000683	0.000706	10																													0.000826	0.000891	0.000786	0.000834333	12
										0.000717	0.00071	0.000738	0.000721667	12																													0.000847	0.000949	0.00094	0.000912	15
										0.000696	0.000703	0.000712	0.000703667	15
PomZ+PomX NPEP																																	PomZ+PomX NPEPK13AR15A
										1	2	3	1	2	3																												1	2	3	1	2	3
PomX N peptide µM	Herring Sperm DNA [µg/mL]	µM His6-PomZ	Δ340nm 1	Δ340nm 2	Δ340nm 3	Δ340nm 1 - ØKontrolle	Δ340nm 2 - ØKontrolle	Δ340nm 3 - ØKontrolle	d [cm]	Activity [Pi/min/ Protein]	Activity [Pi/min/ Protein]	Activity [Pi/min/ Protein]	Activity [Pi/h/ Protein]	Activity [Pi/h/ Protein]	Activity [Pi/h/ Protein]	Ø	STDw	Norm. Activity 1	Norm. Activity 2	Norm. Activity 3				minus DNA			plus DNA						PomX N K13AR15A peptide µM	Herring Sperm DNA [µg/mL]	µM His6-PomZ	Δ340nm 1	Δ340nm 2	Δ340nm 3	Δ340nm 1 - ØKontrolle	Δ340nm 2 - ØKontrolle	Δ340nm 3 - ØKontrolle	d [cm]	Activity [Pi/min/ Protein]	Activity [Pi/min/ Protein]	Activity [Pi/min/ Protein]	Activity [Pi/min/ Protein]	Activity [Pi/min/ Protein]	Activity [Pi/min/ Protein]	Ø
0	0	4	0.0016	0.00143	0.00139	0.000682	0.000512	0.000472	0.248189	0.109217	0.0819929	0.0755872	6.55303	4.91958	4.53523	5.33595	1.0714	9.92981	7.45463	6.87224		WT PomX		MEAN	STDEV		MEAN	STDEV					0	0	4	0.00142	0.00152	0.00137	0.000388	0.000488	0.000338	0.248189	0.0621353	0.0781495	0.0541282	3.72812	4.68897	3.24769	3.88826
0.5	0	4	0.00136	0.00142	0.00155	0.000465333	0.000525333	0.000655333	0.248189	0.0745196	0.0841282	0.104947	4.47118	5.04769	6.2968	5.27189	0.933234	6.77518	7.64877	9.54154			0	6.2984	0.835154		8.0872	0.791751					0.5	0	4	0.00167	0.00143	0.00142	0.000648333	0.000408333	0.000398333	0.248189	0.103826	0.0653915	0.0637901	6.22954	3.92349	3.82741	4.66015
1	0	4	0.00124	0.00142	0.00138	0.000367333	0.000547333	0.000507333	0.248189	0.0588257	0.0876513	0.0812456	3.52954	5.25908	4.87474	4.55445	0.908165	5.34831	7.96908	7.38669			0.5	6.26798	0.736661		9.52688	1.44372					1	0	4	0.00137	0.00148	0.00142	0.000415667	0.000525667	0.000465667	0.248189	0.0665659	0.0841816	0.074573	3.99395	5.05089	4.47438	4.50641
2	0	4	0.00122	0.00125	0.00136	0.000445	0.000475	0.000585	0.248189	0.0712634	0.0760677	0.0936833	4.2758	4.56406	5.621	4.82029	0.708257	6.47913	6.91592	8.5175			1	5.97812	0.762834		16.2224	2.21824					2	0	4	0.00155	0.00145	0.00143	0.000500333	0.000400333	0.000380333	0.248189	0.0801246	0.0641104	0.0609075	4.80748	3.84662	3.65445	4.10285
4	0	4	0.0012	0.0014	0.00127	0.00039	0.00059	0.00046	0.248189	0.0624556	0.0944841	0.0736655	3.74733	5.66904	4.41993	4.6121	0.975161	5.67834	8.5903	6.69752			2	6.36887	0.914528		20.6584	2.04822					4	0	4	0.00134	0.0015	0.00143	0.000322	0.000482	0.000412	0.248189	0.0515659	0.0771887	0.0659787	3.09395	4.63132	3.95872	3.89467
6	0	4	0.00128	0.00122	0.00135	0.000448667	0.000388667	0.000518667	0.248189	0.0718506	0.062242	0.0830606	4.31104	3.73452	4.98363	4.34306	0.625171	6.53251	5.65892	7.5517			4	5.14057	1.90732		18.8488	1.25538					6	0	4	0.00157	0.00134	0.00126	0.000658	0.000428	0.000348	0.248189	0.105374	0.068541	0.0557296	6.32243	4.11246	3.34377	4.59289
8	0	4	0.00115	0.00127	0.00114	0.0003225	0.0004425	0.0003125	0.248189	0.0516459	0.070863	0.0500445	3.09876	4.25178	3.00267	3.45107	0.6951	4.69555	6.44273	4.54995			6	4.54805	1.26161		26.3595	1.25034					8	0	4	0.00143	0.00169	0.00136	0.000481667	0.000741667	0.000411667	0.248189	0.0771353	0.118772	0.0659253	4.62812	7.12634	3.95552	5.23666
10	0	4	0.0013	0.00141	0.00118	0.000434	0.000544	0.000314	0.248189	0.0695018	0.0871175	0.0502847	4.17011	5.22705	3.01708	4.13808	1.10533	6.31897	7.92055	4.57179			8	5.65303	1.64715		34.2465	2.4162					10	0	4	0.00133	0.00163	0.00149	0.000274333	0.000574333	0.000434333	0.248189	0.0439324	0.0919752	0.0695552	2.63595	5.51851	4.17331	4.10926
12	0	4	0.0013	0.00125	0.00138	0.000449667	0.000399667	0.000529667	0.248189	0.0720107	0.0640036	0.0848221	4.32064	3.84022	5.08933	4.41673	0.630075	6.54707	5.81908	7.71186			10	4.74022	0.638565		35.3034	3.69516					12	0	4	0.00137	0.00157	0.00148	0.000335667	0.000535667	0.000445667	0.248189	0.0537545	0.085783	0.0713702	3.22527	5.14698	4.28221	4.21815
15	0	4	0.00131	0.00108	0.00122	0.000312667	8.26667e-05	0.000222667	0.248189	0.0500712	0.0132384	0.0356584	3.00427	0.794307	2.1395	1.97936	1.11365	4.55237	1.20361	3.24199			12	3.52313	0.489942		39.9555	5.86276					15	0	4	0.0017	0.0016	0.00171	0.000583333	0.000483333	0.000593333	0.248189	0.0934164	0.0774022	0.0950179	5.60499	4.64413	5.70107	5.31673
										Kontrolle 1	Kontrolle 2	Kontrolle 3	ØKontrolle	µM PomX-N Peptid									15	4.21975	1.05625		44.2794	6.71868															Kontrolle 1	Kontrolle 2	Kontrolle 3	ØKontrolle	µM PomX-His6
										0.000918	0.000979	0.000857	0.000918	0																													0.00111	0.0011	0.000886	0.001032	0
										0.000908	0.000869	0.000907	0.000894667	0.5																													0.0011	0.000993	0.000972	0.00102167	0.5
										0.000841	0.000889	0.000888	0.000872667	1										from Figure 2G																			0.00105	0.000928	0.000885	0.000954333	1
										0.00076	0.000818	0.000747	0.000775	2																													0.0012	0.000919	0.00103	0.00104967	2
										0.00083	0.000807	0.000793	0.00081	4																													0.00124	0.000899	0.000915	0.001018	4
										0.000841	0.000809	0.000844	0.000831333	6																													0.00075	0.000836	0.00115	0.000912	6
										0.000823	0.000821	0.000832	0.0008275	8																													0.00114	0.000862	0.000843	0.000948333	8
										0.000867	0.000872	0.000865	0.000866	10																													0.000922	0.000865	0.00138	0.00105567	10
										0.00086	0.000815	0.000876	0.000850333	12																													0.0013	0.000854	0.000949	0.00103433	12
										0.00099	0.00102	0.000982	0.000997333	15																													0.00108	0.00116	0.00111	0.00111667	15
PomZ+ DNA + PomX NPEP																		2.0771												PomZ+ DNA+ PomX NPEPK13AR15A
PomX N peptide µM	Herring Sperm DNA [µg/mL]	µM His6-PomZ	Δ340nm 1	Δ340nm 2	Δ340nm 3	Δ340nm 1 - ØKontrolle	Δ340nm 2 - ØKontrolle	Δ340nm 3 - ØKontrolle	d [cm]	Activity [Pi/min/ Protein]	Activity [Pi/min/ Protein]	Activity [Pi/min/ Protein]	Activity [Pi/h/ Protein]	Activity [Pi/h/ Protein]	Activity [Pi/h/ Protein]	Ø	STDw	Norm. Activity 1	Norm. Activity 2	Norm. Activity 3										PomX N K13AR15A peptide µM	Herring Sperm DNA [µg/mL]	µM His6-PomZ	Δ340nm 1	Δ340nm 2	Δ340nm 3	Δ340nm 1 - ØKontrolle	Δ340nm 2 - ØKontrolle	Δ340nm 3 - ØKontrolle	d [cm]	Activity [Pi/min/ Protein]	Activity [Pi/min/ Protein]	Activity [Pi/min/ Protein]	Activity [Pi/min/ Protein]	Activity [Pi/min/ Protein]	Activity [Pi/min/ Protein]	Ø	STDw	Norm. Activity 1	Norm. Activity 2
0	0	4	0.00137	0.00128	0.00148	0.00067	0.00058	0.00078	0.248189	0.107295	0.0928826	0.124911	6.43773	5.57296	7.49467	6.50178	0.962455	13.3718	11.5756	15.5672										0	60	4	0.00193	0.00189	0.00204	0.000723333	0.000683333	0.000833333	0.248189	0.115836	0.109431	0.133452	6.95018	6.56584	8.00712	7.17438	0.74634	13.4034	12.6622
0.5	0	4	0.00137	0.0014	0.00154	0.0007455	0.0007755	0.0009155	0.248189	0.119386	0.12419	0.14661	7.16317	7.45143	8.79663	7.80374	0.871858	14.8786	15.4774	18.2715										0.5	60	4	0.0021	0.00178	0.00191	0.000936667	0.000616667	0.000746667	0.248189	0.15	0.0987545	0.119573	9.00001	5.92527	7.17438	7.36655	1.54635	17.3565	11.4269
1	0	4	0.00143	0.00148	0.00161	0.000828333	0.000878333	0.00100833	0.248189	0.132651	0.140658	0.161477	7.95908	8.43951	9.68862	8.69574	0.892785	16.5318	17.5297	20.1242										1	60	4	0.00181	0.00181	0.00208	0.000743333	0.000743333	0.00101333	0.248189	0.119039	0.119039	0.162278	7.14235	7.14235	9.73666	8.00712	1.49782	13.774	13.774
2	0	4	0.00168	0.00147	0.00152	0.00111	0.0009	0.00095	0.248189	0.177758	0.144128	0.152135	10.6655	8.64769	9.12812	9.48043	1.05402	22.1533	17.9621	18.96										2	60	4	0.00198	0.00183	0.00176	0.000863333	0.000713333	0.000643333	0.248189	0.138256	0.114235	0.103025	8.29538	6.8541	6.1815	7.11033	1.07998	15.9976	13.2181
4	0	4	0.00182	0.00168	0.00161	0.00128867	0.00114867	0.00107867	0.248189	0.20637	0.18395	0.17274	12.3822	11.037	10.3644	11.2612	1.02741	25.7191	22.925	21.5279										4	60	4	0.00184	0.00201	0.00189	0.000716667	0.000886667	0.000766667	0.248189	0.114769	0.141993	0.122776	6.88613	8.51958	7.36655	7.59075	0.839489	13.2799	16.43
6	0	4	0.00181	0.00167	0.00171	0.00123467	0.00109467	0.00113467	0.248189	0.197723	0.175303	0.181708	11.8634	10.5182	10.9025	11.0947	0.692882	24.6414	21.8473	22.6456										6	60	4	0.00226	0.00205	0.00184	0.001211	0.001001	0.000791	0.248189	0.193933	0.160303	0.126673	11.636	9.61816	7.60036	9.61816	2.0178	22.4399	18.5486
8	0	4	0.00174	0.0017	0.00185	0.0010895	0.0010495	0.0011995	0.248189	0.174475	0.16807	0.192091	10.4685	10.0842	11.5255	10.6927	0.74634	21.7442	20.9458	23.9395										8	60	4	0.00199	0.00215	0.00184	0.00083	0.00099	0.00068	0.248189	0.132918	0.158541	0.108897	7.9751	9.51246	6.53381	8.00712	1.48958	15.38	18.3448
10	0	4	0.00182	0.00181	0.00201	0.001222	0.001212	0.001412	0.248189	0.195694	0.194093	0.226121	11.7416	11.6456	13.5673	12.3182	1.08283	24.3886	24.189	28.1806										10	60	4	0.00189	0.00217	0.00188	0.0008625	0.0011425	0.0008525	0.248189	0.138123	0.182963	0.136521	8.28737	10.9778	8.19129	9.15214	1.58177	15.9822	21.1706
12	0	4	0.00173	0.00188	0.0017	0.001128	0.001278	0.001098	0.248189	0.180641	0.204662	0.175836	10.8384	12.2797	10.5502	11.2228	0.926615	22.5125	25.5062	21.9138										12	60	4	0.0019	0.00221	0.00191	0.000763333	0.00107333	0.000773333	0.248189	0.122242	0.171886	0.123844	7.33453	10.3132	7.43061	8.35944	1.69267	14.1446	19.889
15	0	4	0.00181	0.0018	0.00188	0.0011395	0.0011295	0.0012095	0.248189	0.182482	0.180881	0.193692	10.9489	10.8529	11.6215	11.1411	0.418827	22.742	22.5425	24.1391										15	60	4	0.00221	0.00212	0.002	0.00104667	0.000956667	0.000836667	0.248189	0.167616	0.153203	0.133986	10.0569	9.19218	8.03915	9.09609	1.01232	19.3948	17.7271
										Kontrolle 1	Kontrolle 2	Kontrolle 3	ØKontrolle	µM PomX-His6																										Kontrolle 1	Kontrolle 2	Kontrolle 3	ØKontrolle	µM PomX-His6
										0.000676	0.000674	0.00075	0.0007	0																										0.00115	0.00121	0.00126	0.00120667	0
										0.000625	0.000624	6.69E-4	0.0006245	0.5																										0.00131	0.00111	0.00107	0.00116333	0.5
										0.000567	0.000577	0.000661	0.000601667	1																										0.00107	0.00106	0.00107	0.00106667	1
										0.00056	0.000634	0.000516	0.00057	2																										0.00119	0.00111	0.00105	0.00111667	2
										0.000456	0.000529	0.000609	0.000531333	4																										0.00119	0.00114	0.00104	0.00112333	4
										0.000566	0.000523	0.000637	0.000575333	6																										0.00115	0.001	0.000997	0.001049	6
										0.000678	0.00059	0.000623	0.0006505	8																										0.00125	0.00108	0.00107	0.00116	8
										0.000622	0.000529	0.000574	0.000598	10																										0.00111	0.00096	0.000945	0.0010275	10
										0.000589	0.000644	0.000573	0.000602	12																										0.0013	0.00107	0.00104	0.00113667	12
										0.00065	6,31E-$	0.000691	0.0006705	15																										0.00114	0.00121	0.00114	0.00116333	15
PomZ+ DNA + PomX NPEP																		2.0771												PomZ+ DNA+ PomX NPEPK13AR15A
PomX N peptide µM	Herring Sperm DNA [µg/mL]	µM His6-PomZ	Δ340nm 1	Δ340nm 2	Δ340nm 3	Δ340nm 1 - ØKontrolle	Δ340nm 2 - ØKontrolle	Δ340nm 3 - ØKontrolle	d [cm]	Activity [Pi/min/ Protein]	Activity [Pi/min/ Protein]	Activity [Pi/min/ Protein]	Activity [Pi/h/ Protein]	Activity [Pi/h/ Protein]	Activity [Pi/h/ Protein]	Ø	STDw	Norm. Activity 1	Norm. Activity 2	Norm. Activity 3										PomX N K13AR15A peptide µM	Herring Sperm DNA [µg/mL]	µM His6-PomZ	Δ340nm 1	Δ340nm 2	Δ340nm 3	Δ340nm 1 - ØKontrolle	Δ340nm 2 - ØKontrolle	Δ340nm 3 - ØKontrolle	d [cm]	Activity [Pi/min/ Protein]	Activity [Pi/min/ Protein]	Activity [Pi/min/ Protein]	Activity [Pi/min/ Protein]	Activity [Pi/min/ Protein]	Activity [Pi/min/ Protein]	Ø	STDw	Norm. Activity 1	Norm. Activity 2
0	0	4	0.00143	0.00131	0.00151	0.000606	0.000486	0.000686	0.248189	0.0970463	0.0778292	0.109858	5.82278	4.66975	6.59146	5.69467	0.967239	12.0945	9.69955	13.6911										0	60	4	0.0017	0.00169	0.00183	0.00058	0.00057	0.00071	0.248189	0.0928826	0.0912812	0.113701	5.57296	5.47687	6.82207	5.9573	0.750452	10.7474	10.5621
0.5	0	4	0.00147	0.00139	0.00167	0.000727333	0.000647333	0.000927333	0.248189	0.116477	0.103666	0.148505	6.98862	6.21993	8.91033	7.37296	1.38576	14.5161	12.9194	18.5076										0.5	60	4	0.00196	0.00203	0.00224	0.000716667	0.000786667	0.000996667	0.248189	0.114769	0.125979	0.159609	6.88613	7.55872	9.57652	8.00712	1.40013	13.2799	14.577
1	0	4	0.00156	0.00169	0.00154	0.000850667	0.000980667	0.000830667	0.248189	0.136228	0.157046	0.133025	8.17367	9.42278	7.9815	8.52599	0.782571	16.9775	19.5721	16.5784										1	60	4	0.00234	0.00257	0.00233	0.000803333	0.00103333	0.000793333	0.248189	0.128648	0.165481	0.127046	7.71887	9.92883	7.62278	8.42349	1.30455	14.8858	19.1478
2	0	4	0.00169	0.00194	0.00159	0.00101033	0.00126033	0.000910333	0.248189	0.161797	0.201833	0.145783	9.70784	12.11	8.74698	10.1883	1.73221	20.1641	25.1536	18.1684										2	60	4	0.0032	0.00288	0.00293	0.00113	0.00081	0.00086	0.248189	0.180961	0.129715	0.137723	10.8577	7.78292	8.26335	8.96798	1.65405	20.939	15.0094
4	0	4	0.00195	0.00178	0.00166	0.00126267	0.00109267	0.000972667	0.248189	0.202207	0.174982	0.155765	12.1324	10.4989	9.34592	10.6591	1.40013	25.2002	21.8074	19.4124										4	60	4	0.00364	0.00433	0.00364	0.00053	0.00122	0.00053	0.248189	0.0848755	0.195374	0.0848755	5.09253	11.7224	5.09253	7.3025	3.82777	9.82095	22.6067
6	0	4	0.00212	0.00167	0.00183	0.00142467	0.000974667	0.00113467	0.248189	0.22815	0.156086	0.181708	13.689	9.36513	10.9025	11.3189	2.19179	28.4334	19.4523	22.6456										6	60	4	0.00539	0.00505	0.00494	0.00126333	0.000923333	0.000813333	0.248189	0.202313	0.147865	0.130249	12.1388	8.87189	7.81495	9.60855	2.25409	23.4097	17.1094
8	0	4	0.00186	0.00221	0.00183	0.001228	0.001578	0.001198	0.248189	0.196655	0.252705	0.191851	11.7993	15.1623	11.511	12.8242	2.02996	24.5083	31.4936	23.9096										8	60	4	0.00637	0.00679	0.0061	0.000995	0.001415	0.000725	0.248189	0.159342	0.226602	0.116103	9.56051	13.5961	6.9662	10.0409	3.34096	18.4374	26.2201
10	0	4	0.0018	0.00201	0.00241	0.00109	0.0013	0.0017	0.248189	0.174555	0.208185	0.272242	10.4733	12.4911	16.3345	13.0997	2.97762	21.7541	25.9453	33.9285										10	60	4	0.00792	0.00798	0.00731	0.00082	0.00088	0.00021	0.248189	0.131317	0.140925	0.0336299	7.87901	8.45552	2.0178	6.11744	3.56208	15.1947	16.3065
12	0	4	0.00219	0.00261	0.00291	0.001398	0.001818	0.002118	0.248189	0.223879	0.291139	0.339182	13.4328	17.4683	20.3509	17.084	3.47505	27.9012	36.2835	42.2709										12	60	4	0.0089	0.00975	0.00821	0.000333333	0.00118333	-0.000356667	0.248189	0.0533808	0.189502	-0.0571175	3.20285	11.3701	-3.42705	3.71531	5.77513	6.1767	21.9273
15	0	4	0.00215	0.00214	0.00232	0.00150733	0.00149733	0.00167733	0.248189	0.241388	0.239787	0.268612	14.4833	14.3872	16.1167	14.9957	0.972	30.0832	29.8837	33.4761										15	60	4	0.0107	0.0109	0.0117	-0.000233333	-3.33333e-05	0.000766667	0.248189	-0.0373666	-0.00533808	0.122776	-2.24199	-0.320285	7.36655	1.60142	5.08437	-4.32369	-0.61767
										Kontrolle 1	Kontrolle 2	Kontrolle 3	ØKontrolle	µM PomX-His6																										Kontrolle 1	Kontrolle 2	Kontrolle 3	ØKontrolle	µM PomX-His6
										0.000822	0.000797	0.000853	0.000824	0																										0.00109	0.00112	0.00115	0.00112	0
										0.000745	0.000701	0.000782	0.000742667	0.5																these values were not considered for the calculation of the mean for a technical reason										0.00133	0.00119	0.00121	0.00124333	0.5
										0.000696	0.000721	0.000711	0.000709333	1																										0.0016	0.00152	0.00149	0.00153667	1
										0.000678	0.000681	0.00068	0.000679667	2																										0.00218	0.00194	0.00209	0.00207	2
										0.000679	0.000695	0.000688	0.000687333	4																										0.00325	0.00301	0.00307	0.00311	4
										0.000676	0.000714	0.000696	0.000695333	6																										0.0043	0.00397	0.00411	0.00412667	6
										0.000626	0.00065	0.000638	0.000632	8																										0.00547	0.00509	0.00528	0.005375	8
										0.000711	0.000688	0.000709	0.00071	10																										0.00717	0.00663	0.00703	0.0071	10
										0.000795	0.000813	0.000768	0.000792	12																										0.0087	0.00849	0.00851	0.00856667	12
										0.000654	0.000656	0.000618	0.000642667	15																										0.011	0.011	0.0108	0.0109333	15
[truncated: 9 more columns]
