# Supplementary material for: PomX, a ParA/MinD ATPase activating protein, is a triple regulator of cell division in Myxococcus xanthus
Source: eLife. 2021 Mar 18;10:e66160. doi: 10.7554/eLife.66160 (PMC7993993; doi:10.7554/eLife.66160)
Supplement: Figure 6—source data 1. [file elife-66160-fig6-data1.xlsx]

## Sheet: Figure 6-source data 1
Source data for Figure 6B
Set 1					Set2						Set1					Set2						Set1					Set2															Set1					Set2
		95	18				72	21					2	26				4	45					5	33				6	19														46	13				6
Strain	Cell	division	no division		Strain	Cell	division	no division			Strain	Cell	division	no division		Strain	Cell	division	no division			Strain	Cell	division	no division		Strain	Cell	division	no division												Strain	Cell	division	no division		Strain	Cell	division
SA4797	1	3	0		SA4797	1	1				SA7061	1		2		SA7061	1		2			SA9753	1	1	1		SA9753	1	0	5			SA4797		SA7061		SA9753		SA9754			SA9754	1	1			SA9754	1	1
	2	1	2			2		1				2		3			2		1				2	0	1			2	1	4		n=	206		77		63		65				2	1				2	3
	3	3	0			3	1					3		3			3		1				3	0	2			3	2	2		fission	167	81.068	6	7.79221	11	17.4603	52	80			3	2				3	1
	4	2	1			4	1					4		3			4		2				4	0	2			4	1	3		no fission	39	18.932	71	92.2078	52	82.5397	13	20			4	1	1			4	1
	5	4	1			5	1					5	1				5	1	3				5	0	3			5	2	3													5	4
	6	1	1			6	1					6		2			6		1				6	1	3			6	0	2													6	1
	7	3	1			7	1					7		2			7		1				7	0	1																		7	2	1
	8	3	1			8	1					8	1	1			8		2				8	0	3																		8	2
	9	5	1			9	1					9		2			9		1				9	0	2																		9	1
	10	5	0			10	1					10		2			10		3				10	1	1																		10	1
	11	2	1			11	1					11		1			11		3				11	0	2																		11	2
	12	5	1			12	1					12		1			12		3				12	0	1																		12	1
	13	3	0			13		1				13		4			13		2				13	1	2																		13	2	2
	14	3	0			14		1									14		2				14	0	2																		14	1
	15	1	0			15	1										15		2				15	1	2																		15	3
	16	2	0			16	1										16		3				16	0	2																		16	1
	17	2	1			17		1									17	2					17	0	1																		17	2	1
	18	1	2			18	1										18		1				18	0	2																		18
	19	3	0			19	1										19		2																								19	1
	20	1	0			20	1										20		2																								20	3
	21	1	0			21		1									21		2																								21	1	1
	22	1	1			22		1									22		1																								22	2	1
	23	3	0			23	1										23		2																								23
	24	1	1			24		1									24	1	1																								24	2
	25	3	0			25	1										25		1																								25	1
	26	1	0			26	1										26		1																								26	1
	27	1	0			27	1																																				27
	28	1	0			28	1																																				28	1	2
	29	1	0			29	1																																				29		2
	30	3	0			30		1																																			30	3	1
	31	3	0			31	1																																				31	2	1
	32	1	0			32	1																																				32	1
	33	1	0			33		1
	34	1	0			34	1
	35	1	0			35	1
	36	1	0			36	1
	37	2	1			37	1
	38	1	0			38	1
	39	1	0			39	1
	40	0	1			40		1
	41	1	0			41	1
	42	1	0			42		1
	43	1	0			43	1
	44	1	0			44	1
	45	1	0			45	1
	46	1	0			46	1
	47	1	0			47	1
	48	1	0			48		1
	49	1	0			49	1
	50	0	1			50	1
	51	1	0			51		1
	52	1	0			52	1
	53	1	0			53	1
	54	2	0			54	1
						55	1
						56		1
						57		1
						58		1
						59	1
						60	1
						61	1
						62	1
						63	1
						64	1
						65	1
						66		1
						67	1
						68	1
						69	1
						70		1
						71	1
						72	2
						73	1
						74	1
						75	1
						76		1
						77	1
						78	1
						79	1
						80		1
						81	1
						82	1
						83		1
						84	1
						85	1
						86	1
						87	1
						88	1
						89	1
						90	1
						91	1
						92	1
[truncated: 1 more columns]
